# Supplementary material for: Integrated transcriptome and proteome analysis reveals posttranscriptional regulation of ribosomal genes in human brain organoids
Source: eLife journal article supplement (doi:10.7554/elife.85135), 2023-03-17

H9 hESC

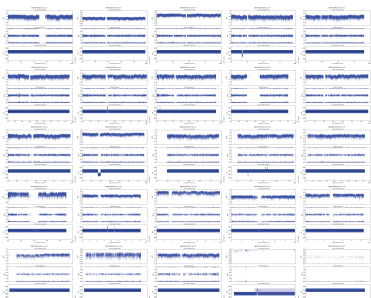

H9 SOX2:SOX2-P2A-EGFP  
AAVS1-syn:dTomato clone 10.1

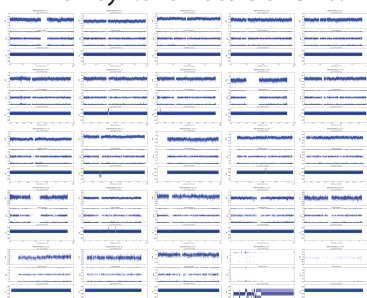

H9 SOX2:SOX2-P2A-EGFP  
AAVS1-syn:dTomato clone 10.2

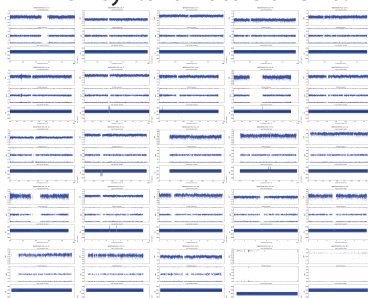

H9 G3BP1::G3BP1-V5-mScarlet

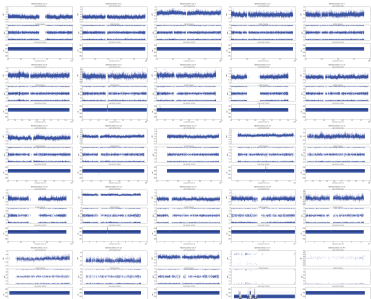

H9 5'TOP clone 1

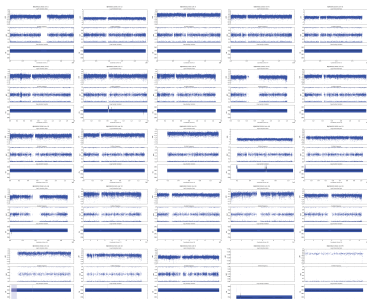

H9 non-5'TOP clone 1

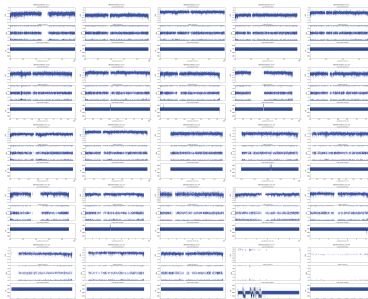

Rozh-5 hiPSC

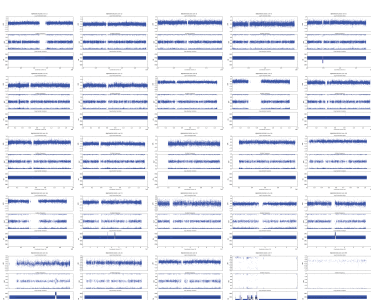

Rozh-5 5'TOP clone 1 hiPSC

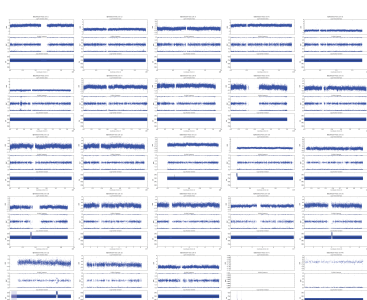

Rozh-5 5'TOP clone 2 hiPSC

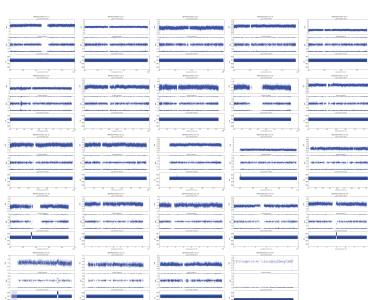

Rozh-5 non-5'TOP clone 1 hiPSC

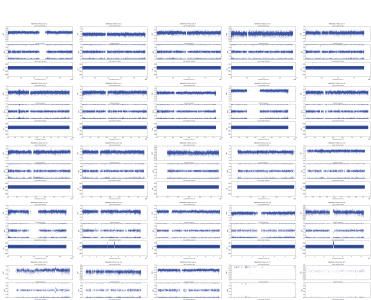

Rozh-5 non-5'TOP clone 2 hiPSC

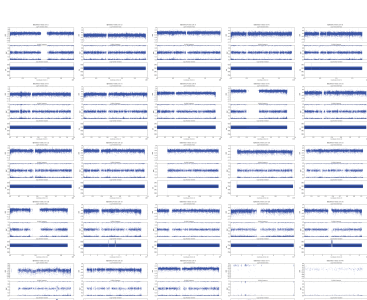

Rozh-5 TSC2 +/+ 4D11 hiPSC

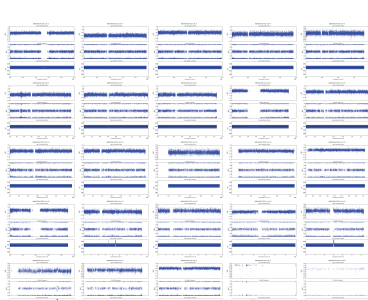

Rozh-5 TSC2 -/- 4G11 hiPSC

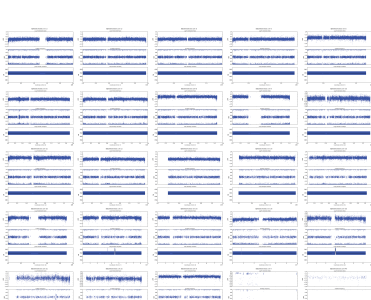

Rozh-5 TSC2 -/- 5G10 hiPSC

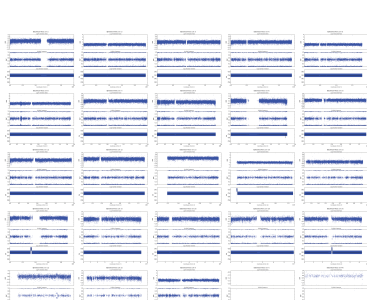

H9 SOX2:SOX2-P2A-EGFP  
AAVS1-syn:dTomato TSC2 +/+ 4H10

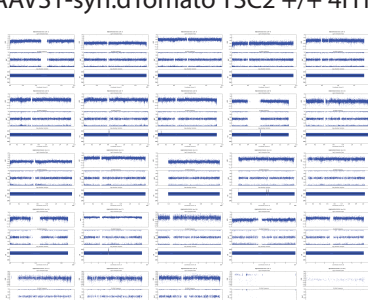

H9 SOX2:SOX2-P2A-EGFP  
AAVS1-syn:dTomato TSC2 +/+ 3B2

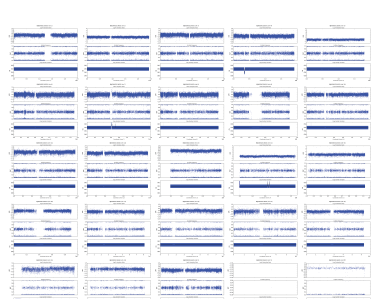

H9 SOX2:SOX2-P2A-EGFP  
AAVS1-syn:dTomato TSC2 -/- 3A5

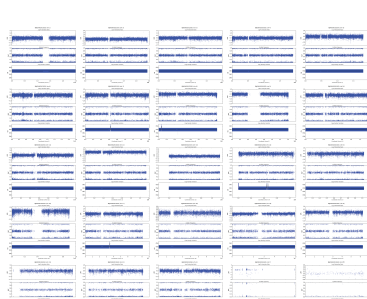

H9 SOX2:SOX2-P2A-EGFP  
AAVS1-syn:dTomato TSC2 -/- 2C9

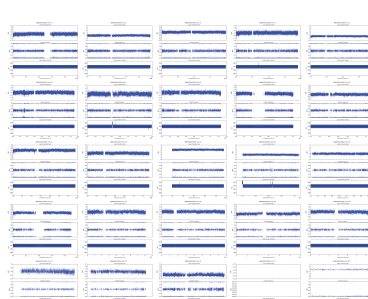

Supplement: supp2 [file elife-85135-supp2-v1.pdf]
