# Supplementary material for: Integrated transcriptome and proteome analysis reveals posttranscriptional regulation of ribosomal genes in human brain organoids
Source: eLife. 2023 Mar 29;12:e85135. doi: 10.7554/eLife.85135 (PMC10059687; doi:10.7554/eLife.85135)
Supplement: Figure 1—source data 1. [file elife-85135-fig1-data1.xlsx]

## Sheet: rsem.tpm.gene
gene_id	Sox2.GFP_d40-100981	Sox2.GFP_d40-100983	Syn.Tom_d40-100992	Sox2.GFP_d40-110954	Syn.Tom_d40-110956	Syn.Tom_d40-110957	DblPos_d40-110958	DblPos_d40-110959	DblPos_d40-110960	Sox2.GFP_d60-114326	DblPos_d60-114327	Syn.Tom_d60-114328	Sox2.GFP_d60-114329	DblPos_d60-114330	Syn.Tom_d60-114331	Sox2.GFP_d90-114332	DblPos_d90-114333	Syn.Tom_d90-114334	Sox2.GFP_d60-116151	DblPos_d60-116152	Syn.Tom_d60-116153	Sox2.GFP_d90-116154	DblPos_d90-116155	Syn.Tom_d90-116156	Sox2.GFP_d90-116157	DblPos_d90-116158	Syn.Tom_d90-116159	Sox2.GFP_d120-121570	DblPos_d120-121571	Syn.Tom_d120-121572	Sox2.GFP_d120-121573	DblPos_d120-121574	Syn.Tom_d120-121575	Sox2.GFP_d120-122062	DblPos_d120-122063	Syn.Tom_d120-122064
dTomato|NA	4.7	7.29	124.61	7.99	120.31	267.37	80.54	124.89	79.85	9.24	98	236.2	4.14	46.84	132.7	9.95	5.18	79.85	6.51	76.66	227.78	8.93	23.23	187.67	20.74	18.16	165.39	7.96	44.33	189.52	8.98	7.42	72.12	11.42	7.57	75.12
EGFP|NA	104.22	117.98	4.61	131.31	1.53	0.66	13.97	19.09	53.62	132.32	30.66	0.68	103.55	37.11	0	90.54	55.7	0	105.21	40.28	0	111.1	100.36	0	85.61	95.47	0	165.42	142.28	1.11	119.13	155.81	0	56.74	99.51	0
ENSG00000000003|TSPAN6	93.12	84.54	18.33	102.24	26.51	29.85	45.31	59.78	58.06	101.59	46.06	10.47	96.14	48.84	12.5	74.62	72.65	37.5	106.48	53	13.11	79.76	76.01	35.24	63.13	63.4	42.23	64.46	64.13	38.36	56.64	56.29	40.28	54.18	50.26	51.83
ENSG00000000005|TNMD	0	0	0	0	0.3	0	0	0	0.23	0	0	0	0	0	0	0	0	0	0	0	0	0	0	0.26	0	0	0	0	0	0	0	0	0	0	0	0
ENSG00000000419|DPM1	102.87	98.52	65.54	79.35	63.96	65.07	65.98	88.58	75.77	87.9	79.37	58.82	98.78	69.86	62.93	87.16	102.82	77.77	92.4	72.15	64.79	95.37	86.64	80.58	93.79	87.81	77.86	84.58	87.9	92.89	81.83	76.63	75.81	92.36	89.84	85.77
ENSG00000000457|SCYL3	11.38	11.84	13.11	7.89	19.74	16.72	15.57	11.08	7.15	11.53	10.35	14.57	8.47	9.02	12.74	11.15	6.6	15.88	9.73	9.43	13.34	10.72	10.66	12.03	13.05	11.82	14.5	10.52	13.29	16.63	11.18	11.66	16.11	14.96	11.83	17.11
ENSG00000000460|C1orf112	24.87	24.32	12.03	27.26	10.11	10.02	6.52	8.93	16.25	24.76	9.33	10.09	24.14	12.98	5.88	23.39	12.06	10.81	21.38	17.32	10.35	21.97	26.96	8.73	15.56	20.83	10.36	19.3	21.23	12.73	25.19	20.32	12.95	14.45	10.01	8.25
ENSG00000000938|FGR	0	0	0	0	0.18	0.13	0.29	0.13	0	0	0	0	0	0	0	0	0.48	0	0	0	0	0	0.12	0	0	0	0.13	0	0	0	0	0	0	0	0.3	0
ENSG00000000971|CFH	0	0	0.28	0	0	0	0	0	0	0.48	0	0	0	0	0.16	0	0	0.22	0	0	0	0	0.05	0.23	0	0	0	0	0	1.67	0	0	0	0	0	0
ENSG00000001036|FUCA2	19.59	20.62	9.89	23.78	14.11	12.36	14.2	11.92	9.83	23.03	11.24	7.2	25.59	11.68	9.35	24.48	20.61	15.07	23.42	11.84	4.89	33.7	31.9	14.14	19.66	31.79	10.57	26.52	23.54	14.54	19.14	23.79	20.17	21.26	20.9	14.46
ENSG00000001084|GCLC	26.87	27.32	27.56	27.78	16.35	22.24	19.63	20.29	26.85	22.38	18.44	27.21	23.97	16.77	15.15	41.82	22.74	20.83	23.34	17.88	17.37	25.57	24.11	18.73	39.85	30.83	20.19	28.43	27.1	27.95	27.33	21.47	14.7	28.75	27.44	24.2
ENSG00000001167|NFYA	43.59	41.56	48.54	43.37	38.66	51.98	45.76	52.64	49.22	36.24	60.06	81.74	44.73	57	79.86	50.86	16.11	54.98	45.53	54.7	76.13	47.42	47.83	59.16	43.19	43.27	45.61	50.27	48.1	46.66	51.45	47.26	48.65	41.91	38.16	44
ENSG00000001460|STPG1	4.56	3.49	4.71	5.73	11.57	6.55	5.47	3.41	5.38	3.04	4.07	3.32	2.99	1.57	8.06	1.76	1.2	4.44	2.04	2.25	2.91	2.07	2.29	3.17	1.58	1.65	3.92	2.45	0.83	1.53	0.99	0.46	3.53	1.21	1.22	2.83
ENSG00000001461|NIPAL3	4.54	7.6	9.38	8.73	15.66	11.16	11.19	8.79	11.01	4.02	5.1	3.79	5.42	6.64	4.26	6.97	6.08	9.66	4.23	5.44	4.96	5.71	7.95	8.93	5.44	4.22	9.41	6.57	6.63	5.89	6.45	6.23	9.67	4.59	5.93	6.07
ENSG00000001497|LAS1L	43.66	41.39	39.79	44.69	51.32	45.4	47.7	35.77	44.07	43.1	38.27	39.28	38.5	42.62	39.26	42.2	39.41	48.78	50.63	51.42	42.49	46.86	48.42	52.21	44.54	37.45	64.91	43.7	43.8	46.81	51.53	56.13	63.03	42.64	45.04	50.5
ENSG00000001561|ENPP4	6.79	4.84	16.76	9.44	17.11	13.31	11.01	11.51	7.58	6.16	8.38	17.25	6.44	10.28	19.25	5.61	4.02	12.05	6.27	10.58	19.45	6.26	6.77	12.02	4.22	4.69	12.55	4.84	6.43	10.61	3.98	4.2	9.23	3.69	3.14	11.87
ENSG00000001617|SEMA3F	10.37	13.56	35.13	8.29	31.39	41.09	37.01	24.04	29.11	3.91	25.46	63.38	6.73	29.11	65.89	5.57	4.33	37.41	10.65	28.01	53.06	3.65	8.49	43.41	5.2	4.36	34.76	5.52	7.73	35.33	8.16	1.85	40.77	4.96	2.16	22.55
ENSG00000001626|CFTR	2.71	1.2	3.15	2.14	2.73	8	2.23	6.41	2.77	3.72	9.09	17.02	8.09	4.36	15.31	3.36	0	8.63	0.68	8.11	10.77	4.73	4.72	8.93	2.39	0.69	5.31	1.48	6.07	10.87	6.02	4.88	12.28	4.64	5.06	5.32
ENSG00000001629|ANKIB1	32.64	31.76	62.46	36.22	71.76	59.84	52.72	51.47	47.02	34.23	43.24	44.76	38.32	44.51	44.71	56.88	22.96	75.76	41.35	46.83	47.64	45.5	54.09	67.61	46.45	45.65	57.8	51.46	60.51	67.68	65.67	64.25	86.45	51.61	47.33	58.75
ENSG00000001630|CYP51A1	198.84	171.5	210.43	183.29	132.55	187.27	144.5	203.14	143.58	185.55	186.96	193.63	174.55	158.83	157.68	123.27	103.1	113.62	234.13	234.35	238.42	152.1	129.84	98.78	111.93	123.58	93.34	83.41	101.25	71.79	80.62	85.52	52.28	81.98	89.85	73.09
ENSG00000001631|KRIT1	59.63	54.88	49.9	47.55	42.31	35.26	40.33	30.63	53.98	56.61	37.8	26.84	51.97	36.44	34.99	60.63	25.54	37.12	55.48	43.55	37.45	57.43	55.95	31.12	64.66	62.75	37.43	46.78	64.17	45.76	53.43	56.82	54.23	65.86	52.4	44.33
ENSG00000002016|RAD52	26.83	39.03	28.12	44.05	29.83	35.97	21.74	26.42	39.27	41.4	23.1	19.93	25.7	28.07	25.87	32.69	29.84	37.68	40.23	24.08	26.36	34.27	38.8	35.55	37	35.33	41.03	19.79	30.36	35.8	34.93	41.29	34.96	30.42	26.21	38.98
ENSG00000002330|BAD	39.55	49.46	91.72	42.79	57.14	81.2	66.83	67.34	63.79	47.81	77.52	84.78	50.2	71.8	72.62	51.13	85.83	55	45.88	61.83	86.3	69.86	44.98	68.11	44.86	42.03	71.91	81.05	50.59	78.51	58.28	48.34	54.5	49.54	60.77	63.26
ENSG00000002549|LAP3	29.77	25.6	24.2	30.45	20.63	22.07	20.78	29.47	22.34	34.5	26.99	30.09	36.44	31.47	29.27	42.27	46.37	30.89	32.72	34.17	36.97	37.08	33.66	22.36	36.78	42.9	27.27	51.2	37.82	32.11	29.91	33.46	23.93	37.46	43.21	30.87
ENSG00000002586|CD99	129.86	170.67	9.85	150.13	5.81	11.9	31.06	45	84.17	148.21	69.68	17.03	115.43	72.71	13.48	89.65	191.24	4.8	118.43	72.3	16.61	155.07	154.35	13.55	90.94	186.1	4.77	80.28	102.96	11.67	81.08	103.7	1.93	67.13	144.37	3.49
ENSG00000002587|HS3ST1	0.35	1.17	1.96	1.43	3.03	1.62	5.86	1.75	0.7	0.08	1.58	3.43	0	1.86	6.81	7.7	3.77	11.75	0.06	0.85	2.67	2.7	3.77	10.22	7.04	4.76	12.71	3.28	3.73	26.59	5.61	3.71	37.82	7.99	6.01	15.15
ENSG00000002726|AOC1	0.09	0.09	0	0	0	0.26	0	0	0.11	0	0	0	0	0	0	0	0	0	0.21	0	0	0	0	0	0	0	0.1	0	0	0	0	0	0	0	0	0
ENSG00000002745|WNT16	0.52	0.53	0	0.37	0.32	0.86	0	0.37	0.5	0	0.08	0.19	0.4	0.26	0.15	2.21	4.42	0.41	0.08	0	0	1.59	1.81	0.45	1.23	1.84	0.23	0.65	0.89	0.07	0.48	1.48	0	0.52	0.91	0.15
ENSG00000002746|HECW1	9.33	5.61	46.7	11.22	29.78	41.76	34.08	25.65	22.42	7.73	37.31	43.45	11.8	34.02	38.55	24.45	8	30.72	11.28	35.27	47.32	10.81	15.23	23.58	24.33	14.95	26.04	16.23	19.14	22.9	22.08	17.21	29.61	41.15	22.43	27.63
ENSG00000002822|MAD1L1	24.08	27.59	26.77	22.86	28.8	16.5	32.8	22.99	23.93	21.18	23.76	20.13	19.94	21.84	16.76	22.43	22.85	19.01	32.23	19.45	23.47	22.44	14.64	14.74	23.65	24.31	16.25	23.4	24.82	18.01	23.15	21.27	17.19	18.12	19.92	24.18
ENSG00000002834|LASP1	56.19	61.75	102.12	71.69	101.6	98.07	100.84	82.35	91.26	76.43	99.17	125.5	85.26	94	120.38	78.4	54.71	96.52	77.54	91.61	125.02	87.86	103.92	105.77	74.08	75.19	88.95	86.58	93.27	93.52	91.77	93.43	104.79	76.53	75.77	85.97
ENSG00000002919|SNX11	22.1	32.84	29.48	27.14	24.39	45.04	30.66	46.74	30.42	30.08	32.56	34.93	26.21	31.86	21.47	30.6	19.52	42.98	21.8	23.28	22.67	26.76	25.43	22.53	31.64	35.72	29.91	29.1	36.93	40.3	29.28	22.29	36.27	34.85	36.23	24.06
ENSG00000002933|TMEM176A	0.79	1.81	1.23	0	1.01	0.74	0	0.44	0.25	0	0.91	0	0	0	0.12	0	0	0.24	0	0	0	0	0	0	0	0	0.36	0	0.19	0.87	0	0	0	0	0	0
ENSG00000003056|M6PR	88.35	72.52	57.67	83.37	87.14	64.87	66.65	73.66	70.39	76.37	61.88	49.34	67.82	79.91	42.68	110.45	78.5	70.28	74.78	54.79	59.97	76.9	78.52	75.32	81.4	105.5	77.32	79.89	81.68	80.21	105.9	77.05	67.7	99.67	110.26	101.23
ENSG00000003096|KLHL13	17.35	17.19	15.76	14.53	23.03	16.43	7.11	8.26	12.82	12.25	5.7	1.19	11.51	5.32	1.82	6.82	4.91	7.38	14.84	7.32	0.78	10.63	10.38	15.93	4.81	4.8	8.75	9.53	11.24	12.5	11.85	13.01	14.46	3	2.09	6.17
ENSG00000003137|CYP26B1	1.99	2.56	16.87	1.58	12.63	10.92	30.57	5.96	18.26	1.41	2.82	4.15	0.41	0.76	1.65	0.43	0.09	2.32	0.66	1.04	3.68	1.72	0.62	2.44	0.67	0.2	3.72	2.83	2.99	5.22	1.59	1.54	1.89	0.72	0.53	1.08
ENSG00000003147|ICA1	1.6	0.94	14.44	2.08	26.8	19.2	7.13	5.75	10.13	2.91	6.9	12.79	0.76	7.25	22.51	2.97	2.3	19.56	0.62	3.61	15.46	0.91	1.61	15.56	3.93	3.07	25.32	0.76	3.09	3.69	1.54	2.18	3.08	4.53	6	10.13
ENSG00000003249|DBNDD1	7.56	9.78	36.45	9.73	41.42	37.55	22.46	23.05	17.08	12.65	34.17	53.72	14.36	29.71	49.65	12.16	11.32	37.68	10.41	17.96	37.59	14.47	16.35	47.55	12.18	9.34	39.93	6.45	7.43	35.98	10.01	9.16	38.76	14.32	11.04	33.62
ENSG00000003393|ALS2	29.03	23.66	45.08	26.55	46.88	44.88	30.89	52.85	41.8	30.14	42.07	49.69	28.1	42.33	53.05	33.3	17.21	52.87	34.43	41.96	41.61	23.44	32.09	52.85	29.48	27.62	43.22	26.13	35.96	39.61	33.71	34.07	62.09	33.06	29.32	50.16
ENSG00000003400|CASP10	1.2	0.06	0.44	0.06	0.06	0.33	0.2	0.09	0.07	1.36	0	0.46	0.19	0.21	0.04	0.12	0.09	0.24	0.04	0.27	1.7	1.7	1.29	3.6	0	1.72	0.13	0.17	0.13	0.29	0.11	0.06	0.24	0	0.2	0.12
ENSG00000003402|CFLAR	12.48	18.51	21.85	10.81	19.45	21.6	15.42	11.81	14.86	11.72	12.97	30.35	10.02	21.23	25.63	22.54	10.96	23.38	11.38	22.18	24.55	17.73	19.43	21.38	15.82	14.07	18.8	22.85	21.36	25.71	20.19	19.88	21.98	12.87	18.58	16.01
ENSG00000003436|TFPI	2.66	2.99	2.61	2.55	3.26	3.39	2.59	2.2	3.36	2.24	4.03	2.5	2.51	2.1	1.41	6.99	6.77	3.3	2.79	2.34	1.91	14.87	23.18	3.86	9.47	13.56	3.21	17.84	27.05	4.21	17.96	30.8	5.61	4.91	8.81	4.27
ENSG00000003509|NDUFAF7	27.98	20.97	45.66	30.86	51.16	47.65	32.01	39.52	29.89	28.1	33.68	37.65	32.1	35.65	46.52	36.32	33.86	43.12	29.35	30.94	46.15	38.02	39.6	38.03	38.56	38.47	46.6	26.46	35.94	42.52	29.06	34.1	49.96	27.76	27.82	52.27
ENSG00000003756|RBM5	315.09	317.67	399.4	275.77	466.69	422.25	359.7	335.93	350.79	284.49	348.56	340.96	283.58	280.59	353.46	413.5	300.6	401.32	323.21	323.88	342.17	411	390.54	381.85	381.14	358.38	362.98	376.38	390.68	473.76	377.8	357.44	450.94	405.64	358.38	380.38
ENSG00000003987|MTMR7	9.29	8.96	51.75	5.67	52.75	42.61	36.8	28.45	22.72	8.51	27.62	36.66	9.27	27.02	37.82	14.37	4.4	38.86	8.38	20.82	35.3	13.07	13.53	34.34	12.31	9.57	30.85	12.64	18.02	35.26	14.82	14.89	32.88	18.31	9.89	33.05
ENSG00000003989|SLC7A2	0.95	1.33	0.14	0.34	0.08	0.16	0	0.14	0.29	0.35	0.13	0.07	0.13	0.06	0	1.13	0.84	0	0.18	0.29	0	0.65	0.98	0.18	2.28	3.52	0.12	2.06	2.21	0.35	0.99	1.6	0.11	3.61	4.3	0
ENSG00000004059|ARF5	186.62	145.76	179.15	192.68	185.25	219.78	204.78	180.89	200.94	162.67	191.47	248.41	176.38	223.65	211.7	133.83	193.44	173.62	187.03	203.36	222.42	151.36	154.87	200.22	103.51	115.95	211.99	152.26	177.76	181.21	150.64	157.69	146.55	128.79	130.85	191.28
ENSG00000004139|SARM1	27.18	24.1	45.53	33.97	51.71	43.61	53.36	33.33	35.37	32.89	36.26	35.09	37.42	28.73	30.44	35.38	22.34	42.12	33.28	34.62	39.28	25.96	30.88	32.72	44.4	33.63	39.03	32.69	41.67	36.53	41.98	37.9	47.02	52.39	35.89	38.91
ENSG00000004142|POLDIP2	59.43	51.52	73.47	59.61	63.85	67.38	67.4	60.95	57.41	62.98	69.39	77.29	64.34	72.31	69.81	63.46	70.49	70.32	55.05	62.38	74.94	61.58	64.22	71.48	64.38	64.36	76.04	64.9	66.29	70.38	64.28	64.44	67.42	64.07	66.24	72
ENSG00000004399|PLXND1	6.75	5.7	106.17	6.66	11.91	68.14	23.66	36.63	37.35	10.01	97.82	172.49	25.21	105.43	165.19	9.09	15.63	82.48	8.05	81.07	159.14	18.39	29.17	129.7	12.46	8.58	67.17	4.23	10.58	42.06	12.94	8.02	86.32	11.41	13.1	79.85
ENSG00000004455|AK2	104.8	106.25	103.15	105.01	85.17	107.17	99.6	78.1	66.41	92.4	63.91	60.2	127.49	63.66	61.2	76.13	70.33	311.93	113.78	90.71	55.28	122.14	108.35	118.49	73.53	86.18	63.19	78.98	78.87	76.6	112.84	82.55	119.1	69.38	73.13	71.62
ENSG00000004468|CD38	0	0	0.4	0	0.24	0.15	0	0.25	0.19	0	0.04	0.1	0	0.22	1.4	0.24	0	0.18	0.18	0.19	0.36	0.17	0.75	0.05	0.24	0.18	0.17	0.72	2.01	0.17	0.54	1.41	1.01	0.22	0.2	0.12
ENSG00000004478|FKBP4	86.28	99.34	87.78	89	73.68	100.46	84	78.74	101.35	74.2	97.84	89.04	73.54	80.3	89.55	78.32	75.63	105.03	80.98	95.28	91.44	67.53	60.02	97.46	66.62	73.67	88.3	59.44	64.31	71.93	65.82	53.69	99.79	62.51	58.88	82.54
ENSG00000004487|KDM1A	238.26	221.64	237.01	224.92	251.85	260.1	278.94	247.7	267.74	246.41	292.52	231.05	246.84	265.57	218	233.35	222.93	218.73	265.5	276.28	230.16	222.57	221.16	241.62	228.5	185.79	217.65	243.46	233.94	232.42	282.03	249.95	240.84	243.6	194.27	229.99
ENSG00000004534|RBM6	215.98	252.8	238.09	180.63	257.8	244.95	256.46	230.45	296.13	217.08	228.47	206.97	203.76	243.7	221.45	297.67	416.07	308.5	234.43	253.87	215.21	277.11	267.66	312.27	327.98	307.27	329.26	212.22	236.93	251.73	299.89	323.33	345.14	284.25	241.46	274.96
ENSG00000004660|CAMKK1	7.67	8.87	15.36	7.78	14.73	15.5	13.77	9.76	11.22	10.46	21.56	19.06	14.53	20.23	19.16	14.7	14.44	26.81	10.16	18.37	15.4	11.55	11	25.47	13.29	10.23	23.75	5.7	7.83	25.53	10.58	8.02	25.9	13.46	7.81	21.2
ENSG00000004700|RECQL	56.29	34.82	29.72	42.47	26.06	26.42	23.09	42.56	30.36	44.6	26.68	25.49	43.61	39.86	20.97	43.74	27.33	31.63	40.81	35.46	27.58	45.89	48.01	25.74	41.34	33.12	23.31	55.29	45.37	39.61	50.26	52.26	31.8	31.77	37.45	31.34
ENSG00000004766|VPS50	21.62	22.23	42.78	24.74	34.31	38.94	44.26	37.05	34.86	19.23	34.44	42.88	25.21	30.09	44.81	32.54	25.24	37.13	19.97	33.95	40.91	25.65	29.21	33.35	39.46	33.42	33.26	36.14	38.3	30.41	25.02	29.96	35.11	25.3	30.54	35.75
ENSG00000004776|HSPB6	1.01	0	1.35	0.38	0.78	0.91	0.2	1.4	0.42	0	0	0.24	0	0.21	0	0.38	0	0	0	1.08	0	0.4	1.02	0.23	0	0	0.19	0.41	0.98	1.69	0	0.74	0.72	0	0.42	0.19
ENSG00000004777|ARHGAP33	71.73	66.52	113.27	66.22	123.41	133.12	126.32	48.33	111.36	77.98	116.07	160.13	83.3	169.66	201.56	217.52	84.7	133.83	83.03	121.41	121.99	139.7	179.7	143.34	93.1	86.89	154.22	90	97.5	120.89	180.01	145.88	158.14	109	89.13	154.11
ENSG00000004779|NDUFAB1	103.74	126.03	198.12	121.74	137.28	166.57	150.92	149.29	125.57	123.6	139.93	154.06	129.64	149.9	172.26	75.06	158.63	115.33	129.61	157.96	182.7	116.44	103.41	135.85	85.94	87.92	117.64	119.05	133.83	121.04	105.62	107.34	110.12	102.28	93.68	140.18
ENSG00000004799|PDK4	0.58	1.08	0	1	0	0.16	0.07	0.08	0.58	0.9	0.39	0	1.81	0.25	0	1.32	1.74	0	1.73	1.06	0	3.65	3.14	0.16	1.22	2.94	0.12	2.69	2.17	0.13	2.53	3.87	0.08	0.6	1.73	0.13
ENSG00000004809|SLC22A16	0	0	0.18	0	0	0	0	0.16	0	0	0	0	0	0.35	0	0	0	0	0	0.18	0	0.16	0	0	0	0	0.15	0	0	0	0	0	0	0.18	0	0.15
ENSG00000004838|ZMYND10	3.2	8.46	1.93	5.17	3.52	2.83	3.33	3.61	1.53	1.35	1.51	2.37	2.73	1.6	2.32	0.61	3.49	4.12	2.52	5.62	2.31	1.69	4.95	8.04	2.68	0.35	3.21	5.02	2.49	3.74	4.95	1.12	5.57	0.19	0.37	4.85
ENSG00000004846|ABCB5	0.67	0.19	0	0.22	0.06	0	0.12	0.14	0.46	0.04	0	0	0.04	0.09	0.33	0.12	0.13	0.11	0.04	0.13	0.19	0.04	0.35	0.31	0.35	0.06	0.04	0.16	0.48	0.18	0.58	0.13	0.24	0.04	0.08	0.44
ENSG00000004848|ARX	71.53	80.42	4.45	62.68	15.34	20.23	36.28	20.68	51.89	65	16.33	0.21	60	20.87	0	57.92	33.98	0.34	59.1	25.26	2.03	71.33	86.01	1.41	49.98	66.29	0.83	155.99	175.45	6.02	150.42	188.87	4.36	33.7	62.99	0
ENSG00000004864|SLC25A13	19.47	17.92	8	14.96	10.46	8.04	6.3	10.27	17.98	15.11	12.67	4.22	17.42	9.45	8.19	16.06	12.56	5.44	18.71	12.48	2.69	22.16	15.24	7.51	17.76	22.81	10.19	27.26	20.33	11.57	15.76	18.39	6.76	13.17	21.48	4.7
ENSG00000004866|ST7	36.46	33.49	86.01	26.18	103.24	103.66	80.73	91.66	75.25	38.25	66.38	60.4	49.39	61.13	74.88	49.45	43.9	78.96	34.9	54.03	63.3	40.18	54.31	73.21	50.65	55.34	74.16	32.3	48.27	62.21	38.12	46.09	62.78	41.86	52.96	81.43
ENSG00000004897|CDC27	80.57	60.48	65.95	60.8	67.02	58.28	49.72	72.81	81.06	40.05	62.09	60.07	56.91	53.8	62.39	70.2	33.57	95.78	72.69	52.74	53.87	76.41	70.72	60.74	65.2	55.28	64.57	65.87	66.41	77.47	75.61	57.33	59.19	59.39	50.37	55.4
ENSG00000004939|SLC4A1	0	0.17	0.68	0.19	0.55	0.23	0.39	0.23	0.21	0	0.21	0	0.16	0.62	0.76	0.2	0.3	0.79	0.6	0.05	0.57	0.81	0.18	0.47	0.91	0.81	0.19	0.22	0.47	0.24	0.35	0.42	0.47	0.22	0.43	0.61
ENSG00000004948|CALCR	0	0	0.24	0.75	0.09	0.23	0.21	0.08	0.22	0	0	0.08	0.07	0	0	0	0.05	0.09	0.19	0	0	0	0	0	0	0	0	0	0	0	0	0	0.23	0	0	0
ENSG00000004961|HCCS	23.9	25.66	28.08	15.39	19.7	16.49	25.56	26.6	21.26	21.06	20.77	16.51	25.23	19.67	12.55	23.98	14.41	20.78	27.49	22.48	21	24.3	16.21	20.68	22.99	22.42	16.73	25.01	19.85	20.89	22.68	17.02	13.56	19.12	13.56	20.37
ENSG00000004975|DVL2	48.04	51.98	31.79	54.96	41.39	36.04	37.46	27.83	37.87	55.77	35.29	33.66	46	37.63	31.76	57.76	29.92	27.78	75.52	41.55	34.02	52.07	53.14	52.68	62.92	65.35	53.31	45.16	43.45	36.95	47.96	65.37	52.92	38.19	71.68	44.92
ENSG00000005001|PRSS22	0	0	0	0	0	0	0	0	0	0	0	0	0	0	0	0	0	0	0	0	0	0	0	0	0	0	0	0	0	0	0	0.33	0	0	0	0
ENSG00000005007|UPF1	39.31	33.83	34.73	35.53	36.74	34.93	37.86	24.16	37.69	40.29	35.48	34.09	46.85	34.04	35.26	37.27	36.32	49.43	37.28	39.14	35.85	43.46	43.15	38.62	57.42	37.47	44.44	45.43	42.36	41.24	37.89	35.01	40.17	41.12	41.88	42.91
ENSG00000005020|SKAP2	4.26	3.23	3.15	1.91	2.4	3.43	1.93	1.41	1.86	3.41	2.87	0.8	1.15	0.64	1.24	3.77	1.35	0.55	2.56	3.22	1.62	1.92	1.59	2.16	1.14	1.68	1.21	4.24	3.39	2.71	1.25	1.05	1.51	1.12	1.21	2.64
ENSG00000005022|SLC25A5	216.07	222.53	182.23	211.83	134.87	162.03	179.42	222.47	191.13	235.7	231.3	203.15	237.69	231.67	217.08	182.43	282.8	159	211.63	218.81	219.43	239.76	222.8	175.55	196.18	234.34	181.64	205.81	205.56	165.52	192.88	217.48	167.86	182.89	202.48	168.77
ENSG00000005059|MCUB	23.91	26.46	0.45	35.45	4.35	2.06	4.51	9.06	20.04	27.89	9.17	1.58	30.92	10.73	1.87	36	31.67	5.39	25.37	15.53	0.96	58.31	52.3	2.77	31.34	60.12	4.41	65.91	57.23	7.99	63.33	52.92	8.12	39.12	60.06	3.64
ENSG00000005073|HOXA11	0	0.1	0.14	0	0	0	0	0	0	0	0	0	0	0	0	0	0	0	0	0	0	0	0	0	0	0	0	0	0	0.21	0	0	0	0	0	0
ENSG00000005075|POLR2J	67.59	54.97	49.48	60.53	50.11	57.09	55.91	63.74	58.46	71.16	61.94	64.46	57.18	72.15	47.94	40.88	70.42	51.22	84.72	60.25	49.1	57.91	51.43	54.38	44.19	45.94	49.91	72.49	69.48	45.19	56.82	58.14	38.39	46.07	53.37	48.31
ENSG00000005100|DHX33	26.91	25.08	24.25	30.28	19.29	20.32	23.2	17.47	25.32	21.52	18.97	17.78	20.92	20.13	17.39	25.4	14.46	33.41	27.09	21.46	17.03	18.01	16.68	22.98	21.68	20.59	26.73	20.86	22.19	28.49	21.15	17.85	23.5	24.81	19.66	29.94
ENSG00000005102|MEOX1	0.24	0	0	0.24	0.37	0	0	0.29	0	0	0	0	0	0	0	0	0	0	0	0	0	0	0	0	0	0	0.24	0	0	0	0	0	0	0	0	0
ENSG00000005108|THSD7A	10.8	6.73	83.12	4.35	58.58	81.5	64.39	71.28	22.72	7.71	43.49	63.87	13.41	38.8	54.2	15.45	7.33	17.42	7.63	42.33	71.61	8.88	15.83	11.06	13.24	13.34	15.66	2.42	6.19	7.1	4.24	2.9	3.22	7.8	5.19	6.23
ENSG00000005156|LIG3	38.65	31.22	31.87	43.02	26.66	28.18	44.04	31.19	30.9	43.99	33.28	44.27	31.87	37.7	59.28	43.83	15.36	29.14	33.32	35.86	34.08	26.87	31.87	25.65	41.87	49.93	21.7	28.37	21.73	29.72	50.67	34.07	34.89	32.19	26.61	41.49
ENSG00000005175|RPAP3	48.27	50.29	49.18	49.14	46.8	44.57	36.13	41.75	40.42	28.86	34.77	33.29	37.6	35	27.52	44.87	34.32	34.06	59.02	30.08	26.48	31.48	39.44	29.3	36.29	45.08	26.85	48.8	45.19	48.57	36.54	45.37	21.49	37.72	26.63	22.98
ENSG00000005187|ACSM3	4.17	1.3	4.48	0.41	4.49	1.37	3.08	2.96	2.1	0.37	1.08	0.09	0.43	4.57	0.18	1.46	0.75	3.46	0.15	0.16	0	2.94	0.87	2.4	2.31	2.68	0.7	0.53	1.61	1.06	1.71	0.23	0.09	0.49	3.36	1.29
ENSG00000005189|REXO5	6.01	13.08	10.41	11.84	8.62	7.71	7.72	12.84	10.52	14.55	10.23	6.38	11.86	10.06	9.61	14.78	17.36	7	9.19	13.28	7.58	24.61	16.64	12.24	10.94	20.3	4.93	23.23	21.21	9	25.02	25.62	8.36	9.41	12.08	4.52
ENSG00000005194|CIAPIN1	58.23	52.2	71.36	61.99	69.99	74.01	69.5	82.74	57.69	64.65	62.15	84.78	63.34	59.52	82.71	59.43	66.03	86.45	64.25	62.96	76.4	54.03	57	66.29	60.15	52.5	60.8	58.58	48.1	65.2	64	49.12	62.08	56.02	57.18	75.07
ENSG00000005206|SPPL2B	95.91	96.42	83.19	91.58	94.04	94.12	87.6	44.29	88.17	71.71	53.77	55.86	79.67	59.49	61.78	106.53	51.42	81.93	81.09	58.65	56.56	95.63	102.23	60.02	115.52	102.61	83.78	89.29	79.08	69.49	107.1	113.15	94.12	90.63	96.98	102.62
ENSG00000005238|FAM214B	17.54	21.22	25.34	17.05	30.66	24.91	28.18	21.09	32.47	24.13	27.18	25.16	22.22	25.5	24.64	23.53	21.54	23.13	22.9	26.32	22.82	18.87	21.08	27.63	22.3	25.42	29.19	22.32	19.5	27.98	18.36	19.08	30.47	19.61	20.86	24.54
ENSG00000005243|COPZ2	0.62	1.15	0.99	1.54	0.78	2.7	1.14	0.69	0	0	1.15	0.95	0	0	0	2.88	4.34	0	0.58	0	0	1.19	1.76	2.75	1.07	7.69	0.6	0.41	3.39	0.52	1.57	3.15	0	2.98	2.93	0
ENSG00000005249|PRKAR2B	33.81	27.84	180.42	34.04	184.77	163.23	120.48	105.17	94.85	32.61	69.52	162.49	39.47	73.51	201.46	37.6	21.37	93.33	31.26	67.47	165.23	33.4	41.83	86.1	33.64	36.21	88.09	24.88	44.53	74.04	29.93	34.48	70.6	36.78	35.65	79.15
ENSG00000005302|MSL3	28.69	28.79	42.17	40.85	40.58	34.9	46.33	45.16	43.91	30.87	27.32	38.97	33.94	34.24	38.52	32.51	27.3	38.85	33.56	36.93	41.3	29.9	30.77	40.89	27.25	30.81	35.54	39.37	43.69	47.26	32.4	39.63	40.02	34.36	26.34	31.53
ENSG00000005339|CREBBP	56.62	55.12	49.12	65.5	60.86	66.07	73.04	30.46	55.03	49.1	51.71	46.64	50.28	51.54	38.58	64.95	26.88	75.06	59.12	56.09	49.33	49.66	64.97	45.31	69.99	65.2	59.02	75.71	58.54	60.25	80.47	63.97	61.57	81.63	66.06	63.83
ENSG00000005379|TSPOAP1	67.96	49.47	112.48	69.46	122.51	108.5	67.48	59.26	101.64	48.54	50.62	92.27	59.75	57.51	77.29	65.6	37.1	51.75	68.09	56.46	82.68	64.44	57.64	63.45	61.44	66.16	62.43	29.15	43.47	41.52	59.11	56.55	78.11	62.56	60.1	58.23
ENSG00000005381|MPO	0	0	0.09	0	0.21	0	0	0	0.08	0	0	0	0	0	0	0	0	0	0	0	0	0	0	0	0	0.08	0	0.16	0	0	0	0	0	0	0	0
ENSG00000005421|PON1	0.19	0.08	0	0	0	0	0	0.12	0	0	0	0.24	0.3	0.21	0	0	0	0	0.1	0.11	0.19	0.3	0	0	0.11	0	0	0.1	0.1	0.28	0	0.21	0	0.11	0.1	0
ENSG00000005436|GCFC2	26.43	24.49	22.31	21.17	14.09	29.17	10.63	13.74	15.5	28.81	18.74	18.42	21.67	15.89	19.2	24.65	19.43	19.28	24.99	28.27	24.41	30.73	19.93	19.67	22.74	21.17	12.52	27.49	27.42	28.63	29.66	34.19	20.28	18.89	16.05	16.57
ENSG00000005448|WDR54	74.3	99.25	72.34	103.88	70.98	59.36	87.27	71.34	63.26	56.96	43.99	60.28	64.77	64.32	51.46	36.86	64.91	39.59	51.98	60.75	59.64	59.31	31.97	54.13	25.54	31.43	36.54	29.09	40	50.01	45.01	40.42	36.04	28.88	21.63	24.69
ENSG00000005469|CROT	22.51	22.78	13.12	23.99	10.99	10.5	16.36	11.61	19.29	19.94	15.07	18.28	17.36	14.87	12.8	38.44	19.85	11.26	22.63	22.07	26.48	46.5	31.92	11.81	33.27	32.68	9.39	23.01	27.96	19.66	31.79	25.61	13.28	25.58	28.84	10.04
ENSG00000005471|ABCB4	1.92	2.65	0	2.22	0.09	0.33	0.2	1.44	0.28	1.79	0.97	0.57	3.05	1.41	0	6.43	2.73	0.32	4.95	0.82	0	5.19	7.52	0.51	3.5	3.07	2.12	3.66	2.93	0.58	2.86	2.51	0.16	1.53	1.46	0.43
ENSG00000005483|KMT2E	90.75	97.08	161.3	91.79	219.94	215.46	183.43	155.8	200.47	78.61	115.59	119.59	95.3	125.26	133.08	139.19	78.62	164.59	111.51	113.38	116.48	106.49	123.02	145.03	132.14	97.14	134.14	116.44	132.35	145.1	151.1	141.25	168.03	112.2	101.32	146.86
ENSG00000005486|RHBDD2	63.74	62.4	116.72	83.41	125	112.26	143.51	127.61	93.23	67.71	83.04	105.3	69.72	88.11	102.2	74.04	94.18	100.76	67.71	83.74	113.2	55.06	56.32	71.19	87.72	83.75	102.54	58.57	68.26	77.04	47.23	43.29	56.58	86.34	95.1	93.58
ENSG00000005513|SOX8	11.26	12.53	1.5	9.58	1.34	2.39	1.81	2.61	11.08	17.75	8.35	1.4	19.65	9.73	1.31	19.03	20.07	5.26	16.57	7.63	0.79	22.53	23.69	5.07	18.15	19.85	4.59	107.67	98.93	9.34	100.89	101.3	12.08	20.61	26.47	9.53
ENSG00000005700|IBTK	36.84	36.66	46.23	35.07	50.81	53.82	49.75	44.16	38.63	35.93	35.62	40.76	35.74	35.81	40.31	48.49	48.07	48.98	34.5	34.5	41.11	39.44	40.47	48.74	51.14	48.62	48.82	42.32	45.27	47.22	43.07	44.01	48.09	47.41	43.46	46.23
ENSG00000005801|ZNF195	116.67	83.01	171.65	71.4	187.55	167.01	174.19	190.73	123.52	91.24	140.29	148.45	97.45	136.55	143.47	104.84	94.63	188.32	112.07	120.45	131.73	96.45	100.08	190.31	116.51	90	172.25	105.06	110.26	183.57	108.98	100.88	142.98	123.89	90.47	184.01
ENSG00000005810|MYCBP2	59.28	66.5	149.66	50.51	147.64	151.39	120.92	86.49	103.44	59.14	59.81	114.69	61.6	86.64	101.05	80.57	51.12	154.82	58.86	77.48	117.57	76.81	80.78	95.04	76	66.35	130.41	76.59	152.96	131.27	106.36	119.23	146.39	75.2	74.3	147.28
ENSG00000005812|FBXL3	33.51	30.41	29.9	31.47	39.99	47.77	46.43	43.12	36.9	40.08	37.58	30.17	42.67	41.08	36.96	69.35	48.65	59.14	35.16	44	38.42	67.35	56.07	66.36	52.87	54.52	48.46	76.23	81.12	65.76	70.55	73.54	58.64	59.52	55.96	51.86
ENSG00000005844|ITGAL	0	0.04	0.06	0	0.48	0	0	0	0.07	1.19	0.05	0.12	0	0.96	0	0.09	0.19	0	0	0	0	0.05	0	0.81	0.17	0.05	1.02	0.05	0.88	0.05	0	0	0.06	0	0	0.15
ENSG00000005882|PDK2	19.26	17.88	28.55	22.97	37.35	27.19	35.22	27.64	34.7	26.45	22.62	33.4	25.72	21.64	29.12	29.21	22.08	13.84	19.74	22.86	29.83	25.91	23.56	24.23	16.04	24.96	12.67	18.1	23.12	19.19	31.22	24.96	21.53	21.59	20.33	20.37
ENSG00000005884|ITGA3	3.28	3.89	18.87	4.57	27.62	17.08	11.33	5.42	9.62	7.26	5.1	9.23	3.42	7.89	13.62	3.27	1.79	19.38	4.21	9.35	12.07	5.61	3.11	10.59	5.12	9.61	14.12	3.04	4.22	13.17	4.68	2.65	15.51	9.86	7.43	12.97
ENSG00000005889|ZFX	38.98	36.93	35.21	31.18	30.29	53.92	29.95	27.53	35.54	37.18	29.59	24.3	28.21	29.33	25.71	53.83	20.49	35.19	42.95	33.42	23.85	48	57.24	25.37	41.22	39.04	29.67	58.06	59.32	68.52	51.67	42.68	34.14	39.93	35.99	36.72
ENSG00000005893|LAMP2	45.64	53.5	47.33	54.93	39.67	46.36	45.8	54.82	45.96	43.48	44.13	44.3	49.99	40.91	39.43	68.51	41.21	40.2	43.94	43.44	41.62	60.32	64.82	37.68	71.96	104.09	39.89	61.03	68.11	41.67	55.58	71.18	36.45	68.8	103.49	37.45
ENSG00000005961|ITGA2B	9.97	11	4.14	8.3	6.26	6.91	6.62	3.29	4.84	7.13	3.74	7.19	7.96	6.81	4.86	7.69	10.53	6.35	15.97	7.97	7.85	10.6	13.2	15.03	4.57	5.43	9.31	4.1	5.02	9	9.69	5.99	15.17	2.75	5.93	8.06
ENSG00000005981|ASB4	0	0.05	0	0	0.08	0	0	0.07	0	0	0.07	0.08	0.13	0	0	0	0	0	0	0	0.06	0.13	0.11	0	0.07	0.06	0.18	0	0.13	0	0	0.07	0	0.14	0	0.06
ENSG00000006007|GDE1	57.62	58.96	73.18	74.44	59.54	76.33	57.14	65.81	77.25	76.69	73.7	72.7	71.47	75.08	102.41	39.57	43.95	61.55	61.21	87.3	85.86	51.28	49.41	58.06	35.18	48.29	73.42	42.8	48.18	65.83	48.9	40.56	49.98	39.73	39.43	54.35
ENSG00000006015|REX1BD	60.92	54.69	83.45	60.33	67.54	87.67	71.34	75.65	78.71	52.17	45.76	56.26	58.44	59.93	58.28	48.66	78.28	65.27	49.71	57.91	62.74	50.05	59.97	68.09	59.47	53.35	74.28	45.73	69.18	61.23	49.06	63.26	68.09	64.39	57.9	66.85
ENSG00000006016|CRLF1	4.16	6.5	8.03	6.32	6.91	9.27	10.06	11.7	8.62	7.9	11.71	4.82	7.66	7.68	4.99	7.6	1.53	9.96	6.73	8.27	9.62	8.61	7.56	11.75	5.67	10.92	8.76	5	6.37	8.1	6.57	8.08	16.71	6.96	6.83	9.17
ENSG00000006025|OSBPL7	7.92	9.72	12.03	7.61	15.71	9.01	9.92	9.98	10.09	8.45	14.37	12.85	12.44	7.4	16.08	17.39	10.79	15.57	11.71	11.43	9.53	12.27	19.75	21.66	19.52	23.68	21.01	30.58	21.68	16.46	16.6	17.23	24.71	40.49	23.12	23.45
ENSG00000006042|TMEM98	148.11	121.84	30.11	152.24	32.69	35.34	59.24	84.85	80.38	162.46	88.77	62.7	146.18	109.01	65.13	112.26	96.45	41.45	150.12	96.3	55.76	151.71	149.04	59.37	110.87	125.15	39.66	158.74	149.94	47.94	168.07	168.21	60.67	122.32	137.83	41.19
ENSG00000006047|YBX2	2.69	3.5	9.53	5.66	12.3	14.52	12.27	5.27	10.24	2.48	2.57	2.73	3.84	5.53	3.13	5.48	3.21	10.48	1.79	2.22	3.37	5.47	5.48	14.81	6.31	3.88	13.34	2.08	3.47	11.91	5.6	4.92	20.24	9.12	3.96	10.61
ENSG00000006059|KRT33A	0	0	0	0	0	0	0	0	0	0	0	0	0	0	0.22	0	0	0	0	0	0	0	0	0	0	0	0	0	0	0	0	0	0	0	0	0
ENSG00000006062|MAP3K14	5.24	5.75	6.8	5.77	5.32	5.94	5.79	3.67	5.62	6.88	8.37	7.74	8.16	7.5	7.12	9.58	7.12	10.74	5.09	5.88	6.53	8.6	10.29	8.36	8.09	7.15	6.48	11.29	8.01	9.48	6.99	9.16	7.77	7.5	7.74	11.07
ENSG00000006071|ABCC8	11.6	10	12.4	8.83	11.52	19.3	9.48	10.01	6.74	12.24	9.16	11.35	14.71	5.79	18.14	12.06	13.06	18.23	11.02	13.71	7.19	13.62	11.02	11.14	15.53	14.7	13.86	10.38	8.52	9.05	12.03	15.66	6.85	5.47	10.3	8.39
ENSG00000006116|CACNG3	0	0	2.92	0	9.11	7.26	0.89	0.38	0.68	0	0.25	4.68	0	0.34	10.29	0.08	0.77	3.37	0	0.18	5.16	0	0.28	1.58	0.18	0.33	3.52	0	0	0.38	0	0	0	0	0	0.61
ENSG00000006118|TMEM132A	107.85	115.21	223.87	97.86	164.99	197.91	191.19	102.96	194.55	141.95	246.48	273.16	160.03	215.94	255.21	124.03	111.41	213.24	157.4	237.78	261.58	129.87	146.75	222.67	141.74	108.91	202.29	62.34	71.76	214.33	97.65	63.73	215.92	143.17	93.83	232.48
ENSG00000006125|AP2B1	138.61	122.4	327.04	145.1	280.8	275.96	279.37	260.12	208.96	148.59	227.84	283.05	157.94	225.8	280.38	137.89	90.7	200.96	154.62	218.95	293.21	140.08	165.3	188.81	136.67	136.87	203.44	121.62	138.44	165.34	129.04	143.89	164.52	126.62	119.53	178.16
ENSG00000006128|TAC1	0	0	69.65	0.24	214.44	83.8	13.11	12.84	29.62	0	0.26	2.02	0	0	0.32	0	1.16	0	0	0.36	2.32	0	0.3	0.57	1.77	1.99	0.99	0	0.25	0.33	0	0	0	3.83	6.8	0.33
ENSG00000006194|ZNF263	40.96	53.5	56.53	43.37	69.31	69.53	60.59	68.73	48.13	50.38	58.52	54.6	55.87	58.19	65.66	64.34	45.49	86.51	57.41	57.37	54.91	56.29	61.19	83.92	65.3	63.34	83	65.02	64.9	95.89	58.6	56.85	77	77.62	67.13	99.45
ENSG00000006210|CX3CL1	8.39	7.88	9.86	15.28	15.29	13.78	17.29	9.83	19.17	7.25	4.46	5.42	7.2	2.99	2.82	3.09	3.32	1.46	8.21	2.51	6.44	4.47	4.61	1.46	2.6	2.74	1.49	1.9	8.46	0.99	2.73	4.68	0.18	1.79	1.75	1.77
ENSG00000006282|SPATA20	19.26	16.92	9.93	18.41	28.69	17.13	13.83	10.62	11.31	15.72	12.18	12.43	20.06	11.75	12.31	16.91	11.69	19.96	12.85	15.46	10.97	20.16	17.17	17.33	24.24	19.06	17.11	13.53	11.92	24.2	9.44	11.06	24.62	14.52	10.35	15.37
ENSG00000006283|CACNA1G	3.16	3.71	9.86	3.69	12.25	10.43	7.95	5.49	9.68	2.9	5.9	15.33	2.37	4.51	11.71	5.2	1.77	2.3	2.34	6.36	12.71	1.86	1.46	0.87	3.28	2.06	1.33	1.38	1.47	2.43	2.83	1.61	1.05	1.35	0.37	0.94
ENSG00000006327|TNFRSF12A	4.31	6.76	0.89	7.3	0.75	1.41	7.44	3.51	3.51	4.22	4.33	2.74	5.03	2.08	0.16	11.94	5.29	1.81	4.61	2.33	1.46	7.29	8.88	3.24	10.27	9.73	1.21	4.25	7.34	3.19	3.8	5.48	2.91	24.28	19.67	2.97
ENSG00000006377|DLX6	4.03	4.35	5.59	0.43	9.63	11.94	8.39	8.39	34.61	0	0	0	0	0.12	0	0	1.77	0	0.66	0	0.11	3.95	9.45	0.68	0.19	0.23	0	31.07	32.09	1.78	46.18	33.73	0.94	0.98	0.68	0.11
ENSG00000006432|MAP3K9	8.72	10.02	26.34	10.17	25.12	24.43	24.93	15	16.04	6.71	16.36	21.27	9.51	14.09	21.06	9.77	5.15	28.82	8.99	15.5	24.1	6.63	10.23	22.39	10.27	6.92	21.26	5.34	8.94	27.18	5.65	5.23	24.9	8.74	6.05	25.34
ENSG00000006451|RALA	57.65	59.2	68.69	57.99	61.06	60.91	70.77	62.66	59.84	51.94	63.39	63.85	65.48	58.82	55.97	66.9	49.47	70.23	60.7	53.77	58.22	63.1	60.48	73.97	75.1	63.55	74	62.05	66.84	75.86	56.84	65.39	80.36	72.7	75.12	78.87
ENSG00000006453|BAIAP2L1	2.69	3.68	2.56	5.15	1.84	2.79	3.1	4.49	3.53	2.19	7.91	2.22	2.86	4.07	4.08	6.56	0.25	7.51	3.89	8.06	1.57	4.4	4.24	2.68	11.4	3.38	3.21	4.03	2.61	4.58	5.54	1.35	5.26	4.54	3.35	4.45
ENSG00000006459|KDM7A	19.18	17.04	15.48	16.02	27.29	24.26	28.07	21.59	18.81	17.5	13.32	9.14	23.32	13.3	8.88	26.87	8.75	17.03	20.96	16.47	9.89	20.04	19.85	20.88	25.55	18.96	17.29	23.79	24.95	19.83	28.32	24.59	20.94	28.44	21.8	21.87
ENSG00000006468|ETV1	9.65	14.64	11.02	3.09	11.51	6.44	8.65	5.92	14.34	20.07	7.84	5.71	21.57	11.62	12.13	70.74	44.55	12.93	15.14	12.17	3.82	51.9	55.01	13.34	76.72	115.28	21.54	102.87	132.89	17.23	123.3	163.2	22.71	57.56	113.79	11.07
ENSG00000006530|AGK	50.46	54.38	60.75	59.62	44.86	57.85	48.22	61.23	44.03	45.81	51.5	57.6	44.28	49.64	50.84	51.59	29.7	51.58	43.68	53.5	56.45	37.81	46	45.37	49.52	38.23	54.58	30.11	43.2	46.23	38.85	37.67	52.85	36.1	46.05	64.11
ENSG00000006534|ALDH3B1	1.66	2.24	1.35	0.84	0.98	0.23	0.99	0.73	0.9	1.18	0.76	0.56	1.26	0.49	0.61	0.87	0.87	0.61	1.69	0.59	1.06	0.78	0.77	0.53	0.95	1.58	0.95	0.46	0.58	1.29	3.92	1.4	1.52	1.28	0.95	0.95
ENSG00000006555|TTC22	0.21	0.06	0	0	0.1	0	0	0.09	0.16	0	0.08	0.09	0	0	0.07	0	0	0	0.07	0	0.07	0.07	0.07	0	0	0	0.14	0	0.08	0.06	0.19	0	0.26	0.08	0	0.14
ENSG00000006576|PHTF2	31.9	35.18	37.12	28.52	37.41	46.98	32.4	30.58	33.76	31.31	31.66	31.18	33.17	34.92	36.28	34.82	21.1	34.45	29.92	30.18	33.48	40.49	43.79	37.24	23.58	32.14	32.06	49.7	37.93	43.97	44.36	39.69	41.57	26.7	37.43	33.24
ENSG00000006606|CCL26	0	0	0	0	0	0	0	0	0	0	0	0	0	0	0	0	0	0	0	0	0	0	0	0	0	0	0	0	0	0	0	0	0	0	0	0
ENSG00000006607|FARP2	26.94	25.95	31.77	22.45	24.05	30.31	43.37	19.63	38.71	27.48	35	40.98	34.16	32.6	41.05	23.49	13.24	31.54	35.93	36.38	30.13	27.51	33.03	36.62	23.18	27.03	32.37	30.13	31.97	43.92	38.35	40.07	41.89	25.2	27.57	35.83
ENSG00000006611|USH1C	0.35	0.71	0	0	0	0	0	0	0	0.55	0	0	0.36	0.39	0	0.12	0	0	0	0	0	1.33	0	0	0	0.26	0	0	0	0	0	0	0.15	0	0	0
ENSG00000006625|GGCT	117.22	83.53	44.11	102.29	43.39	43.69	48.13	57.45	68.83	109.63	50.94	45.8	108.48	66.09	56.45	50.38	104.14	40.5	98.21	72.58	46.54	100.91	89.65	39.65	39.11	52.85	42.35	69.87	60.86	36.4	65.45	68.04	31.6	28.82	46.92	38.93
ENSG00000006634|DBF4	56.17	57.49	10.69	52.87	8.35	13.09	12.25	26.84	31.33	46.85	27.19	5.03	39.69	22.71	5.9	40.29	26.89	16.53	50.99	29.55	8.91	50.62	48.96	17.59	26.11	34.44	13.29	49.64	42.96	17.54	49.37	52.66	17.57	23.19	30.65	17.31
ENSG00000006638|TBXA2R	1.63	1.85	2.21	1.42	2.32	1.8	0.42	0.45	2.07	0.72	1.25	2.13	2.27	1.75	1.35	1.61	2.63	1.93	3.22	1.12	2.98	2.82	2.45	3.45	3.3	1.71	4.07	1.1	2.25	3.8	3.36	3.98	4.89	2.3	1.89	2.92
ENSG00000006652|IFRD1	98.36	167.06	100.16	85.44	113.73	111.99	105.19	109.57	125.9	78.92	103.23	114.32	95.27	104.67	117.05	171.39	119.79	166.02	89.42	95.29	122.22	123.64	122.68	168	144.5	132.71	135.89	105.44	98.49	189.3	88.69	76.33	188.83	130.32	119.55	132.04
ENSG00000006659|LGALS14	0	0	0	0	0	0	0	0	0	0	0	0	0	0	0	0	0	0	0	0	0	0	0	0	0	0	0	0	0	0	0	0	0	0	0	0
ENSG00000006695|COX10	10.55	11.37	16.44	10.03	14.39	14.53	11.15	14.37	14.37	8.41	14.36	12.19	7.87	13.38	11.49	14.7	4.12	16.93	9.17	11.06	13.16	7.71	8.23	12.89	14.11	11.06	15.9	11.04	16.34	12.91	19.6	10.99	16.57	15.3	10.58	14.49
ENSG00000006704|GTF2IRD1	32.16	37.93	39.37	33.87	36.62	46.17	43.93	28	44.26	28.01	44.97	37.51	45.25	41.91	39.96	42.21	38.32	42.38	38.21	30.21	33.94	45.6	37.76	55.33	46.79	36.68	47.48	36.02	39.35	47.96	31.15	31.09	47.09	48.52	39.52	49.7
ENSG00000006712|PAF1	82.35	68.96	77.04	88.68	63.04	88.63	69.5	72.63	73.38	75.07	80.56	66.18	86.19	92.81	83.93	78.71	163.36	77.07	85.12	79.32	89.36	97.93	77.84	85.84	80.16	92.58	82.08	80.48	71.67	83.49	90.75	91.74	76.36	88.77	82.88	97.28
ENSG00000006715|VPS41	72.77	69.33	115.45	80.63	127.87	91.3	90.27	123.37	98.88	64.02	74.03	95.35	73.08	62.03	106.68	125.77	57.98	84.1	69.48	76.07	93.86	89.15	115.32	53.83	118.94	105.9	73.93	72.57	84.94	66.96	89.97	74.06	90.62	108.16	105.35	89.85
ENSG00000006740|ARHGAP44	8.74	7.57	17.31	7.86	17.78	15.53	12.4	6.75	10.64	6.14	8.55	27.94	4.38	7.69	25.81	4.64	1.6	16.08	5.57	9.01	24.78	2.34	4.13	13.43	2.9	2.98	15.12	2.33	2.11	12.95	1.13	1.77	11.12	2	2.01	10.76
ENSG00000006744|ELAC2	39.83	43.78	46.89	51.17	37.62	43.11	38.06	34.85	42.85	44.19	45.28	52.68	43.55	46.81	48.17	50.88	44.6	54.37	51.93	54.82	56.95	43.98	47.54	50.51	51.39	48.23	56.81	54.49	43.26	51.96	48.39	43.85	60.46	50.14	44.93	63.52
ENSG00000006747|SCIN	0.09	0.08	0.28	0.13	1.89	0.28	1.32	1.25	0.84	0.04	0.1	0.17	0.08	0.05	0.07	0.1	0.14	0.09	0.2	0.11	0.1	0.15	0.13	0.19	0.77	0.12	0.24	0.22	0.2	0.13	0.12	0.1	0.2	0.11	0.08	0.11
ENSG00000006756|ARSD	15.33	8.66	9.19	10.99	6.92	11.83	10.42	14.02	7.52	13.42	13.29	5.68	14.9	9.46	8.62	20.08	13.23	7.22	13.69	12.24	4.97	17.03	17.48	11.46	19.68	16.97	6.31	18.89	15.97	10.79	17.67	10.45	7.04	18.05	18.01	9.12
ENSG00000006757|PNPLA4	7.12	4.17	7.51	5.53	5.67	8.4	9.62	4.78	3.37	3.77	6.32	5.2	5.76	2.83	10.53	3.94	1.62	4.32	3.12	3.43	5.6	2.95	2.35	2.69	2.99	3.62	1.65	2.44	1.63	3.22	2.28	0.73	0.96	1.2	1.38	2.49
ENSG00000006788|MYH13	0	0	0	0	0	0	0	0	0	0	0	0	0	0	0	0	0	0	0	0	0	0	0	0.05	0	0	0	0	0	0.07	0	0	0	0	0	0
ENSG00000006831|ADIPOR2	56.98	50.98	41.56	60.68	27.21	39.21	31.03	41.86	38.85	56.91	64.06	53.01	61.28	64.17	45.8	46.75	37.48	43.59	64.23	55.73	55.93	55.34	51.75	49.6	41.58	46.89	44.84	47.87	45.44	52.83	49.51	45.2	57.57	39.33	36.99	43.32
ENSG00000006837|CDKL3	7.49	16.28	26	9.17	33.71	23.16	21.29	14.87	16.55	8.75	12.02	10.51	12.17	14.47	21.33	12.18	19.38	19.63	11	10.03	13.08	17.98	12.41	20.51	27.23	14.43	24.06	16.37	20.52	25.83	11.93	17.63	27.6	18.71	19.71	29.19
ENSG00000007001|UPP2	0	0	1.72	0	2.73	2.99	2.36	1.35	1.46	0.44	0.43	0.85	0.78	0.37	1.32	0.97	0.56	2.94	0.39	0.89	0.46	0.35	0.94	0.87	0.83	1.19	0.89	0.24	1.04	0.6	0.32	0.37	2.66	0.82	0.78	1.33
ENSG00000007038|PRSS21	0	0	0	0	0	0	0	0	0	0	0	0	0	0	0	0	0	0	0	0	0	0	0	0	0	0	0	0	0	0	0	0	0	0	0	0
ENSG00000007047|MARK4	32.37	34.78	75.09	28.61	81.15	79.9	73.19	34.86	58.99	28.11	51.57	81.07	36.27	60.6	84.16	41.9	22.78	67.43	39.55	53.75	66.45	37.31	35.74	71.03	37.92	37.82	59.13	40.82	39.53	59.71	37.03	32.31	62.89	43.37	49.05	63.28
ENSG00000007062|PROM1	49.41	32.17	0.55	41.26	1.52	4.09	6.95	9.73	15.98	52.13	11.42	1.83	51.35	16.57	0.23	28.86	27.63	2.12	45.72	18.44	1.06	41.96	34	2.72	24.78	29.43	5.95	45.72	21.87	37.37	28.55	28.35	0.22	29.76	20.75	1.32
ENSG00000007080|CCDC124	137.03	127.76	130.71	145.22	99.38	126.91	119.98	134.26	133.84	131.37	136.19	146.99	130.03	147.69	139.52	90.5	153.85	107.23	130.87	142.92	151.13	109.35	112	134.4	94.85	79.53	131.82	139.34	124.54	117.04	151.3	121.45	107.02	85.23	112.35	92.58
ENSG00000007129|CEACAM21	0	0	0.21	0	1.2	0.68	0	0	0	0	0	0	0	0	0	0	0	0	0	0	0	2.35	0	0	0	0.6	0.56	0	0.58	0	0	0.61	0	0	0.62	0
ENSG00000007168|PAFAH1B1	162.97	167.46	308.05	155.41	338.59	317.87	279.89	211.67	276.57	162.77	232.71	264.99	173.56	224.06	285.31	253.74	172.74	304.7	165.63	223.76	285.07	186.59	212.62	295.7	243.59	202.34	295.67	165.57	205.67	278.79	208.58	219.83	309.44	201.72	183.82	286.73
ENSG00000007171|NOS2	0.7	0.55	0.54	0.74	0.39	0.43	0.43	0.21	0.55	0.33	0.23	0.37	0.66	0.19	0.17	0.23	0.04	0.4	0.37	0.08	0.43	0.55	0.26	1.2	0.13	0.23	0.52	0.25	0.68	0.9	0.38	0.06	0.24	0.2	0.31	0.63
ENSG00000007174|DNAH9	1.39	1.05	4.69	2.87	4.35	6.91	6	27.09	3.47	0.17	0.87	2.03	0.83	1.72	3.35	13.22	3.71	0.28	0.59	1.57	4.1	4.86	5.09	0.31	2.97	4.32	0.43	1.6	2.06	0.46	1.34	1.65	0.26	0.72	4.48	0.52
ENSG00000007202|KIAA0100	99.87	78.49	90.96	89.48	98.13	75.8	80.2	75.6	79.76	81.24	76.64	84.94	74.89	78.9	89.09	82.96	58.2	108.29	96.6	87.12	89.78	62.59	89.17	83.06	91.84	85.77	88.05	66.8	71.35	91.1	113.48	90.11	102.59	103.57	80.36	108.72
ENSG00000007216|SLC13A2	0	0	0	0.09	0	0	0.12	0.12	0	0	0	0	0.11	0	0	0	0	0	0	0	0	0	0	0	0	0	0	0	0	0	0	0	0	0	0	0
ENSG00000007237|GAS7	8.9	11.21	54.66	12.93	32.62	28.73	21.34	16.08	23.15	6.89	13.1	53.19	5.37	14	48.46	3.48	2.25	38.94	7.09	17.09	53.21	6.35	8.41	23.24	4.33	5.18	41.03	4.2	2.96	12.99	2.4	1.94	3.72	1.88	3.03	18.54
ENSG00000007255|TRAPPC6A	24.57	43.15	23.26	51	9	12.37	16.27	24.97	36.21	22.3	26.97	20.93	24.04	19.84	19.5	20.58	37.86	9.99	33.83	22.42	11.39	8.88	22.89	22.2	24.17	20.83	11.45	29.48	18	16.79	14.76	11.97	13.19	8.09	13.86	11.77
ENSG00000007264|MATK	0.53	0.13	7.05	0.45	3.45	4.58	3.16	0.74	1	0.5	0.17	4.36	0.13	2.07	3.39	0.53	0.69	4.91	0	0.5	1.66	0	0.74	5.44	0	0.93	3.79	1.67	0.94	17.37	0.54	0.85	8.18	0.86	1.69	5.98
ENSG00000007306|CEACAM7	0	0	0	0	0	0	0	0	0	0	0	0	0	0	0	0	0	0	0	0	0	0	0	0	0	0	0	0	0	0	0	0	0	0	0	0
ENSG00000007312|CD79B	0.26	0	0	0	0	0	0	0	0	0	0	0	0	0	0	0	0	0	0	0	0	0	0	0	0	0	0	0	0	0	0	0	0	0	0	0
ENSG00000007314|SCN4A	0.14	1.61	0.17	0.11	0.08	0.14	0.06	1.16	0.13	0	0.06	0.11	0	0.09	0.06	0	0.07	0.04	0	0	0.14	0.03	0.03	0	0.07	0.06	0.03	0	0	0.06	0.03	0	0	0.03	0.03	0
ENSG00000007341|ST7L	19.56	20.93	21.15	35.01	21.63	26.81	24.05	18.74	31.22	24.11	15.91	29.01	23.69	16.5	22.6	24.08	20.73	33.09	24.14	16.57	25.98	26.31	20.15	22.87	24.98	24.5	36.11	24.6	34.11	25.85	30.98	21.74	35.24	31.69	36.6	33.26
ENSG00000007350|TKTL1	6.92	6.9	0.11	4.81	0	4.35	0.1	1.44	3.15	15.59	2.4	1.1	12.86	3.98	1.5	6.34	7.74	0	12.53	2.81	4.76	5.21	4.67	0	2.11	8.22	0.09	8.39	5.25	0.09	6.76	4.57	0	1.66	3.3	0
ENSG00000007372|PAX6	291.22	333.89	52.02	254.65	162.16	103.47	175.71	130.24	305.43	306.47	77.72	5.39	286.89	105.97	1.83	358.87	302.83	15.07	314.37	117.99	12.08	354.01	290.56	14.98	274.78	341.13	12.53	403.32	280.46	94	372.87	434.75	15.97	258.48	345.28	24.67
ENSG00000007376|RPUSD1	23.2	13.05	17.56	15.56	16.36	16.51	19.22	11.36	14.3	15.19	16.99	18.34	19.94	19.28	18.44	16.09	17.22	22.35	15.56	17.74	14.59	11.93	15.61	21.96	23	14.42	22.55	19	18.09	22.31	15.21	15.21	22.54	22	13.92	27.59
ENSG00000007384|RHBDF1	6.94	9.17	2.59	4.68	1.49	2.64	3.59	2.32	8.05	0.71	0.17	2.35	1.56	1.46	0.73	0.53	0.15	1.56	2.26	1.18	0.3	2.32	1.41	3.81	0.55	2.01	1.84	4.71	2.36	4.27	1.42	3.16	0.63	3.88	2.24	1.47
ENSG00000007392|LUC7L	240.13	228.59	266.53	207.19	324.66	290.38	283.67	233.07	327.04	242.49	298.74	344.99	239.44	277.76	346.66	286.93	431.18	359.58	217.2	300.65	339.55	240.54	248.91	401.63	319.13	275.26	397.78	212.71	245.65	297.24	287.9	306.11	404.14	331.55	258.42	382.08
ENSG00000007402|CACNA2D2	5.9	5.51	16.15	7.7	32.75	29.07	22.93	8.39	24.8	1.98	2.27	6.67	1.3	2.37	7.11	0.98	0.51	4.8	2.42	2.53	7.4	0.97	1.39	2.4	1.24	1.03	4.61	4.48	3.9	3.47	2.84	7.13	1.96	1.98	0.77	3.29
ENSG00000007516|BAIAP3	10.07	17.21	53.68	11.24	66.02	49.2	52.34	15.12	34.16	6.52	4.92	7.08	5.08	5.17	10.42	4.9	2.18	9.95	4.71	13.37	12.31	1.95	2.72	8.67	2.11	3.53	5.55	2.88	12.84	4.65	7.1	15.52	5.42	4.41	4.61	12.99
ENSG00000007520|TSR3	41.55	38.5	44.95	33.45	51.89	55.57	59.49	40.86	43.56	44.99	40.98	51.78	48.3	51.57	48.63	34.38	98.36	47.06	36.17	51.41	41.06	39.22	34.32	51.12	46.14	56.01	52.94	44.26	51.91	54.13	49.56	40.19	35.58	39.5	42.5	61.62
ENSG00000007541|PIGQ	39.6	29.36	44.84	41.46	51.58	55.37	46.57	33.22	42.62	43.58	42.47	49.9	43.05	42.25	42.58	32.36	38.53	42.66	37.62	39.76	40.98	33.15	33.92	39.32	29	41.1	42.58	30.42	39.55	33.59	35.31	147.45	55.09	56.82	30.25	40.55
ENSG00000007545|CRAMP1	28.5	21.69	28.74	26.01	27.84	23.12	26.14	11.62	29.57	29.21	31.53	24.38	34.67	21.63	29.97	39.03	21.16	41.27	32.02	24.41	23.35	28.78	36.94	44.52	41.37	33.8	45.01	32.52	35.81	36.54	33.75	34	33.04	41.97	29.64	33.34
ENSG00000007866|TEAD3	20.66	26.52	1.61	23.17	2.64	2.39	5.67	6.62	10.94	23.52	11.46	3.32	22.06	13.18	5.56	16.49	11.57	6.71	18.36	13.18	4.7	26.77	24.5	13.46	20.53	24.2	9.17	17.95	12.32	11.9	18.17	15.95	8	18.93	18.1	7.96
ENSG00000007908|SELE	0	0	0	0	0	0	0	0	0	0	0	0	0	0	0	0	0	0	0	0	0	0	0.06	0	0	0	0	0	0	0	0	0	0	0	0	0
ENSG00000007923|DNAJC11	67.85	47.47	69.23	53.36	52.21	44.32	63.3	51.18	52.56	57.89	48.56	50.06	53.27	51.33	42.67	59.12	33.46	58.58	59.91	56.13	49.84	59.28	48.67	44.38	54.79	57.3	56.97	69.09	56.16	61.51	68.94	53.25	66.35	56.43	56.81	71.17
ENSG00000007933|FMO3	0.44	0	0	0	0	0	0	0.53	0	0.82	0	1.07	0.45	0	0.26	0.48	1.31	0.55	0.45	0	0.7	0.86	0.78	0.53	0.51	0.46	0.85	0.46	0.83	0.86	0.23	1.46	0	0.5	0	0.85
ENSG00000007944|MYLIP	12.72	30.65	13.49	9.16	12.66	15.04	12.91	10.26	20.77	3.89	6.25	6.15	4.28	9.63	8.69	7.4	2.49	11.32	4.33	7.34	7.9	6.13	6.29	11.63	4.44	3.23	9.44	8.36	7.18	13.32	3.32	1.88	5.24	3.84	2.91	7.7
ENSG00000007952|NOX1	0	0.18	0	0.1	0.14	0.71	0.32	0.12	0.23	0	0.11	0	0	0.58	0	0	0	0.14	0	0.22	0	0	0	0.37	0.12	0	0	0	0	0.2	0.09	0.11	0.63	0.12	0	0.1
ENSG00000007968|E2F2	17.87	15.69	0.05	16.94	0.19	0.54	1.19	1.92	8.76	17.33	4.09	0.11	15.08	4.81	0	10.51	11.29	0	13.36	7.29	0.53	23.35	19.15	0.1	6.26	8.2	0.13	20.89	13.16	0.34	26.68	24.54	0.18	2.19	4.57	0.09
ENSG00000008018|PSMB1	252.76	212.73	224.83	259.43	204.25	188.33	191.54	238.39	184.31	270.69	217.22	166.2	252.67	233.92	181.49	171.04	277	142.7	257.28	229.65	212.43	238.13	207.06	161.01	187.15	184.13	168.83	238.37	233.36	194.09	211.26	216.38	172.2	183.74	195.86	179.71
ENSG00000008056|SYN1	8.58	2.94	79.56	3.53	82.91	69.28	54.25	39.43	40.09	6.53	36.05	72.19	13.03	36.53	61.2	13.12	8.21	69.51	6.59	38.1	53.58	10.62	18	51.03	13.93	14.38	53.09	6.9	20.13	53.09	14.22	12.19	52.89	17.07	11.91	52.66
ENSG00000008083|JARID2	39.57	37.89	34.25	34.09	33.7	33.59	37.34	30.38	42.84	22.95	27.92	31.14	22.3	21.36	26.27	14.24	8.72	15.92	25.58	25.81	27.87	14.3	15.63	21.37	15.51	11.49	14.85	14.69	19.45	18.73	14.95	16.86	17.65	11.96	13.22	15.49
ENSG00000008086|CDKL5	14.73	14.16	29.76	15.55	26.23	34.09	23.93	19.78	20.14	12.46	25.44	36.02	19.14	22.13	36.54	17.17	8.77	64.87	11.13	23.03	39.57	17.28	25.61	50.21	21.23	16.66	51.1	19.34	22.19	53.23	21.39	16.54	51.62	18.96	15.36	53.13
ENSG00000008118|CAMK1G	4.15	6.82	5.07	5.85	16.11	14.42	8.41	3.48	10.16	4.76	1	1.59	3	3.88	0.82	3.29	0.7	5.89	4.96	3.16	0.82	1.01	0.87	5.06	0.54	0.44	3.01	0.33	3.44	2.14	0.55	0.44	1.25	0.23	0.49	1.19
ENSG00000008128|CDK11A	87.93	106.26	104.84	72.96	92.41	148.08	82.72	59.51	100.54	95.13	94.32	112.66	83.21	124.06	87.8	101.26	113.94	166.94	86.5	96.52	131.54	128.91	130.48	201.7	162.82	172.48	196.67	119.04	137.2	166.23	147.61	124.74	174.87	193.09	151.77	210.61
ENSG00000008130|NADK	50.8	54.33	48.75	68.82	40.88	67.93	49.24	35.11	49.27	62.71	61.59	41.61	52	49.67	40.11	62.66	52.22	48.87	54.07	42.02	45.65	68.18	65.95	47.22	62.05	54	46.91	61.63	51.22	43.79	64.26	71.19	55.49	49.87	37.55	57.92
ENSG00000008196|TFAP2B	6.41	4.83	7.24	2.03	18.3	11.91	5.05	6.83	3.14	1.15	0.52	0.25	0	0.09	0	0	0.09	0	0	0.04	0.2	0	0	0	0	0.08	0	0.08	0.17	5.09	0	0	0	0.13	0.09	0.04
ENSG00000008197|TFAP2D	0	0	0	0	0.79	0.79	0.16	0.38	0	0	0.78	0	0	0	0	0	0	0	0	0	0	0.16	0	0.37	0	0	0	0.59	0.6	0.58	0.46	0	0	0	0.64	0
ENSG00000008226|DLEC1	1.6	0.44	0.16	0.8	0.66	0.39	0.76	0.32	0.54	0.64	0.05	0.46	0.23	0.55	0.16	0.31	0	0.76	0.33	0.12	0	0.18	0.4	0.46	0.58	0.56	0.16	0.28	0.86	0.07	0.33	0.15	0.26	0	0.19	0.28
ENSG00000008256|CYTH3	16.23	14.45	21.03	13.82	22.69	21.56	19.62	15.33	26.17	17.51	19.36	28.56	16.7	21.64	26.12	23.42	9.62	23.55	15.13	19.57	22.75	25.77	23.01	27.8	26.02	24.65	24.99	23.25	21.44	31.69	24.05	22.55	30.5	22.84	25.38	25.57
ENSG00000008277|ADAM22	13.4	9.01	30.41	13.26	41.84	31.78	30.42	23.25	22.88	11.18	13.55	12.55	11.41	12.58	13.53	10.51	5.35	16.35	12.05	16.71	13.68	14.83	15.79	18.76	10.37	9.1	14.89	19.98	28.97	21.36	30.39	26.37	28.03	12.02	9.55	21.02
ENSG00000008282|SYPL1	51.21	42.11	16.12	45.78	13.03	19.11	12	18.41	24.84	57.02	31.11	24.47	49.45	46.69	24.36	72.69	47.37	34.84	49.35	33.12	29.84	56.07	49.27	26.65	74.59	90.37	36.94	31.79	35.07	19.67	32.09	26.57	23.85	61.73	68.17	23.63
ENSG00000008283|CYB561	8.79	6.87	18.68	13.73	23.28	15.9	16.83	15.97	12.62	9.46	10.8	17.25	8.34	14.18	17.72	6.41	8.13	12.67	8.66	11.13	17.38	8.59	6.49	8.54	7.89	9.98	9.53	4.47	2.4	11.79	9.09	6.15	10.84	7.33	7.37	6.32
ENSG00000008294|SPAG9	230.87	220.96	146.85	201.51	200.3	146.06	170.93	204.04	229.61	218.72	193.77	127.91	265.04	203.31	127.8	343.6	111.56	185.86	243.84	220.33	132.94	316.26	369.1	221.29	286.84	288.46	172.45	272.44	305.79	258.68	361.66	336.26	302.47	292.55	235.61	236.64
ENSG00000008300|CELSR3	44.67	35.15	93.53	34.23	106.55	91.77	106.55	44.31	83.84	42.25	101.11	94.17	45.77	81.38	88.4	66	40	138.92	44.43	87.55	86.6	45.21	63.7	146.22	69.62	51.99	138.62	48.8	61.16	117.13	62.73	64.47	161.88	67.23	59.91	128.29
ENSG00000008311|AASS	101.02	89.97	13.84	94.65	7.97	13.31	28.05	32.64	59.82	95.65	54.06	42.03	81.14	57.84	65.99	118.98	39.63	31.01	88.76	69.37	48.65	118.41	109.12	24.67	102.1	108.73	27.22	89.43	81.94	7.33	107.87	102.17	10.02	91.64	95.3	19.63
ENSG00000008323|PLEKHG6	0.31	0.42	0	0	0	0	0.21	0.24	0	0.15	0	0	0	0	0	0	0	0	0	0	0	0	0	0	0	0	0	0	0	0	0	0.17	0	0	0	0
ENSG00000008324|SS18L2	54.61	47.63	68.63	66.88	69.12	74.79	69.36	72.26	45.77	56.83	62.89	69.72	59.73	67.76	74.43	43.64	70.24	66.38	57.53	73.5	86	68.36	59.03	68.31	45.63	40.17	72.18	47.89	58.32	71.38	55.08	56.08	67.63	48.82	40.88	67.03
ENSG00000008382|MPND	25.63	27.07	37.81	28.67	44.33	35.93	33.54	23.51	37.63	25.1	20.65	14.15	20.24	16.11	21.54	25.56	31.01	25.71	25.63	24.65	16.77	25.35	26	19.55	27.18	23.05	29.19	17.4	21.71	21.29	11.59	17.47	24.49	21.82	22.56	19.46
ENSG00000008394|MGST1	28.15	18.4	4.02	40.07	3.93	2.28	3.32	11.25	16.86	15.32	12.15	12.14	10.33	10.04	17.04	3.96	5.57	4.04	52.56	10.85	43.58	18.03	15.25	11.29	3.39	8	3.36	6.09	9.41	2.93	4.81	8.1	2.24	7.78	6.46	9.13
ENSG00000008405|CRY1	29.76	26.41	38.58	35.51	36.67	37.37	35.79	33.59	30.88	28	32.07	30.11	27.28	28.43	27.75	37.94	26.96	44.69	30.52	32.49	31.77	28.3	36.98	35.28	44.21	44.47	31.8	45.35	54.33	42	37.29	38.72	37.04	27.94	40.59	30.07
ENSG00000008438|PGLYRP1	0	0.5	0	0	0	0	0.58	0	0	0.52	0	0	0	0	0	0	0	0	0	0	0	0.57	0	0.68	0.66	0.58	0	0	0	0.56	0.48	0	0.69	0	0	0
ENSG00000008441|NFIX	19.62	21.83	12.89	35.11	3.34	16.22	26.21	29.75	6.93	75.5	116.64	229.03	95.13	137.17	235.95	165.88	32.13	222.1	83.24	115.15	187.76	96.08	95.8	110.07	139.93	101.15	155.15	285.68	274.04	191.73	301.46	296.02	228.01	200.39	141.99	168.46
ENSG00000008513|ST3GAL1	5.15	3.52	14.75	9.1	7	9.57	6.89	9.62	12.19	5.35	19.63	90.6	4.46	22.72	110.67	11.14	3.27	43.89	6.63	23.71	86.22	5	6.99	28.74	12.02	9.63	36.17	10.2	6.84	24.66	7	7.1	25.68	14.56	9.38	24.7
ENSG00000008516|MMP25	1.81	1.6	1.92	0.28	3.22	0.35	1.94	0.18	1.19	0.67	0.76	0.98	0.58	1.87	1.46	4.32	5.09	3.33	1.24	2.16	2.61	4.19	3.69	2.5	2.81	1.94	2.59	2.03	1.45	3.02	2.61	3.13	7.19	2.31	0.53	3.22
ENSG00000008517|IL32	0	0.18	0	0	0	0	0	0	0	0.69	0	0	0	0	0	0	0	0	0	0	0	0.21	0	0	0	0.21	0	0	0	0.23	0	0	0	0	0	0
ENSG00000008710|PKD1	270.69	319.85	295.75	241.23	361.92	386.98	300.72	152.43	265.52	264.26	274.19	346.2	297.81	242.94	343.77	490.34	188.37	474.18	286.05	284.92	314.44	363.39	392.5	408.67	492.34	395.22	469.09	330.65	302.88	397.04	449.27	447.67	511.68	535.42	477.89	504.5
ENSG00000008735|MAPK8IP2	23.56	20.2	84.42	20.39	78.96	80.68	80.12	38.24	64.39	25.54	53.95	79.52	27.1	54.18	79.01	26.12	19.63	70.41	26.27	54.86	80.19	20.95	26.84	61.54	29.1	23.52	68.79	21.45	28.07	56.34	23.48	26.66	59.09	34.79	26.43	63.02
ENSG00000008838|MED24	89.64	85.91	141.58	90.49	127.56	147.34	124.44	112.64	91.17	106.63	116.02	141.3	108.17	131.25	128.23	119.23	80.59	121.18	104.48	138.39	140.61	95.73	111.21	133.59	96.33	101.15	123.48	107.91	113.2	144.81	135.8	126.56	123.73	112.06	106.42	127.13
ENSG00000008853|RHOBTB2	27.29	20.5	59.99	24.74	60.53	49.7	55.38	30.88	45.13	21.29	29.09	43.03	26.86	31.15	39.29	18.68	9.96	29.13	28.94	35.34	43.92	21.04	19.9	25.87	21.27	12.98	31.13	22.21	23.19	29.26	15.49	16.81	28.87	14.36	13.81	38.91
ENSG00000008869|HEATR5B	16.62	16.51	41.55	15.91	41.26	37.78	39.18	36.59	25.39	17.14	31.98	31.79	19.79	29.09	31.36	29.67	12.54	41.28	19.34	29.18	37.21	20.15	23.6	29.46	29.54	25.2	35.9	23.94	29.71	32.4	26.96	24.58	34.17	25.68	26.73	36.71
ENSG00000008952|SEC62	121.72	125.82	164.71	108.64	170.91	177.59	152.13	197.13	152.63	110.42	127.11	139.32	103.65	136.98	148.49	158.24	273.71	150.72	112.81	118.31	130.74	133.81	126.14	138.06	176.58	156.31	161.46	137.68	177.2	194.8	117.68	127.61	152.57	169.82	162.89	167.79
ENSG00000008988|RPS20	2153.7	2473.32	909.56	2244.01	713.53	885.09	1087.96	1357.15	1680.69	1758.94	1266.38	1000.37	1600.79	1285.62	1134.21	1464.74	2518.74	1073.18	1688.08	1284.92	1083.89	1587.51	1476.58	1120.9	1795	1821.6	1158.95	1727.97	1526.73	1099.77	1571.08	1556.14	1089.9	2179.58	2121.85	1310.15
ENSG00000009307|CSDE1	468.7	404.12	605.35	455.73	619.52	592.3	525.09	649.35	490.72	379.22	547.64	566.91	400.45	523.6	562.46	420.79	198.37	624.79	426.31	506.82	573.22	384.33	407.41	549.31	430.91	371.45	589.02	430.09	439.2	529.23	433.17	422.7	578.15	480.84	396.49	589.49
ENSG00000009335|UBE3C	29.87	34.81	37.92	42.11	43.89	43.19	44.23	32.85	40.88	31.63	29	37.57	34.04	35.29	40.1	46.98	22.18	41.72	35.69	30.89	32.05	43.87	37.26	40.74	47.2	36.13	39.53	50.99	47.91	48.37	44.49	43.96	46.18	46.38	43.55	42.36
ENSG00000009413|REV3L	38.89	31.19	57.74	42.43	82.34	52.33	48.35	38.18	33.7	34.92	29.18	27.73	34.29	30.38	27.52	43.19	31.37	46.55	45.37	34.08	26.43	44.54	38.48	44.5	35.28	37.77	42.34	78.55	92.33	44.46	75.47	92.28	34.98	33.67	45.7	36.85
ENSG00000009694|TENM1	1.02	7.16	11.73	1.01	48.73	23.18	16.31	4.32	5.89	0.43	0.73	2.09	0.83	0.6	3.76	5.53	0.92	2.05	2.03	0.64	1.27	3.07	3.13	1.81	2.64	3.19	2.94	8.65	6.2	1.91	3.54	9.88	2.18	3.82	3.37	1.57
ENSG00000009709|PAX7	2.87	3.71	0.1	0.66	0.23	0.05	0.6	0.96	0.09	0.35	0.17	0	0	0	0	0	0	0	0.04	0	0	0.04	0	0	0.14	0	0	0.13	0.04	0.88	0	0	0	0	0	0
ENSG00000009724|MASP2	5.9	4.95	6.88	7.2	10.48	7.28	6.17	5.08	5.47	7.54	6.68	8.58	7.71	5.78	6.39	9.72	1.11	5.09	9.83	8.04	8.54	8.01	9.33	8.1	3.99	5.89	5.59	10.02	10.38	11.22	6.31	8.29	7.8	5.7	5.33	6.97
ENSG00000009765|IYD	0	0.24	0.12	0.23	0.18	0.34	0.25	0	0	0.36	0.13	0	0.77	0.01	0.05	0.05	0	0.2	0.26	0.27	0.38	0	0.21	0	0	0	0	0	0.3	0	0.1	0.03	0	0	0.13	0.27
ENSG00000009780|FAM76A	12.87	7.9	14.42	10.97	10.81	14.7	12.2	15.85	13.46	12.84	13.91	16.61	13.85	13.98	15.03	16.51	9.25	14.81	11.92	13.03	12.75	12.51	12.19	14.92	15.06	12.13	15.51	14.14	13.97	17.13	10.19	16.77	12.09	13.42	10.75	13.71
ENSG00000009790|TRAF3IP3	0.07	0.53	0.26	0.27	0.37	0.16	0	0.32	0.33	0	0	0.34	0.38	0	0.14	0.07	0	0	0.12	0.08	0.12	0.86	0.47	0.09	0.18	0.15	0	0.12	0.15	0	0	0	0.09	0.2	0.68	0.17
ENSG00000009830|POMT2	24.41	30.6	18.65	39.51	26.77	37.58	44.09	25.32	28.93	22.59	21.53	14.07	31.34	20.35	8.74	19.66	26.62	29.54	29.07	31.49	16.26	25.93	39.3	15.68	25.26	31.55	15.41	42.55	35.42	26.03	36.81	49.56	26.66	29.97	35.69	22.49
ENSG00000009844|VTA1	81.8	71.53	123.86	71.38	112.31	106.5	92.85	118.18	89.27	86.18	97.83	130.01	94.2	89.06	128.26	98.94	68.4	111.76	96.03	100.4	136.71	92.07	95.36	100.38	99	97.7	111.51	91.09	101.92	94.96	92.12	94.4	102.91	99.77	88.1	100.49
ENSG00000009950|MLXIPL	1.11	2.67	6.72	2.13	3.22	4.27	2.29	2.15	1.15	2.36	1.81	1.58	1.26	1.27	1.98	0.32	0.31	0.66	0.97	2.58	2.01	1.55	1.15	0.52	0.42	0.57	2.42	0.61	1.15	1.71	0.94	0.98	2.04	0.74	0.6	0.96
ENSG00000009954|BAZ1B	100.61	96.74	69.63	101	65.55	63.51	69.96	64.64	84.4	97.77	85.23	52.77	90.86	71.12	46.15	95.62	33.34	78.86	102.87	84.21	56.32	92.63	91.37	71.93	89.23	81.56	67.81	99.87	89.1	82.99	102.11	93.05	82.27	82.37	77.13	78.83
ENSG00000010017|RANBP9	52.54	51.11	57.1	50.76	62.68	60.63	56.38	40.65	64.31	58.11	68.79	55.74	70.28	65.48	65.16	88.36	44.31	96.17	61.96	62.58	64.81	77.3	80.9	104.68	84.27	88.11	102	74.83	75.63	97.25	82.11	74.76	93.83	76.74	74.72	90.89
ENSG00000010030|ETV7	0	0	0	0.37	0	0	0	0.22	0	0.22	0	0	0	0	0	0	0	0	0	0	0	0	0	0	0	0	0	0	0	0	0	0	0	0	0	0
ENSG00000010072|SPRTN	15.9	13.52	13.35	10.67	12.32	13.96	16.27	18.62	17.4	15.72	19.35	12.46	16.56	13.81	11.78	18.68	8.07	14.88	12.99	17.26	14.18	12.39	14.01	14.23	14.48	13.74	12.01	17.63	14.37	21.06	12.38	17.58	12	11.71	12.35	14.09
ENSG00000010165|METTL13	19.51	22.27	18.7	22.98	15.36	16.29	13.08	16.05	16.4	20.3	23.58	9.96	17.58	16.65	12.12	20.71	29.28	17.92	21.73	15.31	13.08	16.69	15.52	21.62	16.41	17.18	25.98	33.14	19.98	25.07	23.83	15.79	26.48	13.04	17.91	25.45
ENSG00000010219|DYRK4	27.11	44.15	22.6	52.97	23.8	32.82	22.26	17.8	43.09	45.56	34.67	23.63	44.17	35.09	21.77	45.55	58.75	28.05	60.76	34.22	17.2	50.77	53.34	30.49	57.91	65.09	19.94	48.2	19.71	38.11	38.58	37.88	24.23	40.93	42.14	28.14
ENSG00000010244|ZNF207	259.29	226.27	199.61	252.05	237.87	198.81	195.86	237.96	238.17	226.15	213.79	173.67	216.24	201.5	159.58	272.91	145.31	224.81	214.01	207.87	151.62	225.1	206.53	196.03	316.52	257.34	193.74	262.05	258.94	222.2	237.22	230.43	193.39	268.65	235.59	194.04
ENSG00000010256|UQCRC1	209.8	156.68	244.54	220.2	167.4	192.69	194.37	182.57	219.52	205.74	224.08	197.19	178.52	211.43	179.7	148.9	261.75	142.81	212.43	225.12	179.73	186.6	142.15	145.34	169.04	153.96	199.75	238.55	173.57	123.65	185.48	204.86	188.31	182.37	180.46	178.26
ENSG00000010270|STARD3NL	81.54	76.38	135.22	79.34	134.54	118.9	129.8	121.18	106.51	93.18	109.29	94.94	95.17	100.2	101.85	79.95	83.36	99.96	87.46	97.82	103.61	100.77	100.28	107.16	81.35	93.86	107.32	75.4	78.99	95.84	72.26	87.1	92.81	66.7	80.59	92.41
ENSG00000010278|CD9	12.14	15.45	0.8	13.11	0.47	0.21	0.52	2.58	1.34	2.84	1.72	0	6.01	1.17	0.74	9.82	13.68	0	5.57	2.56	0	22.33	21.32	0	4.92	9.66	0.39	22.54	23.01	2.31	28.84	23.22	0.83	7.63	9.39	0.66
ENSG00000010282|HHATL	0	0	1.38	0	1.15	1.52	0	0.72	0.36	1.1	0.64	0.9	0.34	0.8	0.86	1.76	2.02	1.55	0	0	0	2.43	0.52	0.18	2.14	0.63	0.57	0.88	2.41	2.92	0.82	0.62	2.15	0.37	1.27	1.14
ENSG00000010292|NCAPD2	106.33	89.62	27.76	121.62	21.79	32.88	27.63	29.86	60.23	55.78	38.02	9.72	54.66	68.01	9.77	42.46	30.17	23.24	72.43	41.61	16.79	87.7	83.2	24.73	34.15	54.41	18.6	78.85	55.88	29.29	85.38	73.58	46.11	31.89	46.58	17.06
ENSG00000010295|IFFO1	14.67	15.32	19.19	17.57	17.97	16.42	20.28	13.41	16.55	18.06	18.72	17.76	19.83	17.1	18.05	19.49	16.35	19.29	18.29	21.56	17.86	19.08	17.7	21.43	23.76	19.84	18.78	21.9	23.01	28.53	18.99	19.5	23.04	17.39	21.71	20.99
ENSG00000010310|GIPR	0.56	0.69	4.12	0.34	2.46	7.06	2.55	4.08	4.46	0.35	3.39	5.76	1.48	7.28	5.4	1.45	1.72	3.77	0.52	5.92	4.55	2.14	2.52	8.53	1.48	0.76	3.58	0.82	1.8	1.46	2.61	2	1.43	3.52	3.25	3.65
ENSG00000010318|PHF7	4.87	8.67	8.09	5.57	9.73	9.04	10.03	4.46	10.5	4.25	6.22	8.25	6.35	5.54	7.31	4.82	4.07	8.84	3.43	2.29	7.65	5.18	6.11	7.25	3.86	6.46	6.46	6.88	4.98	11.82	12.67	8.86	15.24	10.51	7.48	5.69
ENSG00000010319|SEMA3G	0.09	0.4	0.22	0.05	0	0	0.05	0	0.26	0	0	0.06	0	0	0	0.05	0	0	0	0	0	0	0	0	0.05	0	0	0.15	0	0.44	0	0	0	0	0	0
ENSG00000010322|NISCH	77.49	78.09	121.66	76.23	147.55	128.9	125.58	97.22	125.32	72.55	91.85	119.63	91.08	94.53	114.99	89	57.28	114.73	92.81	109.07	138.63	85.36	100.72	91.59	88.31	81.79	99.33	84.54	83.65	94.12	90.11	84.84	111.17	89.72	80.77	109.37
ENSG00000010327|STAB1	0.21	0	0.14	0	0	0.03	2.01	0.12	0	0	0	0	0.03	0	0.06	0.03	0.02	0.23	0.06	0	0.12	0.03	0	0.44	0	0.7	0	0.13	0.1	0.03	0.09	0.36	0.03	0.16	0	0
ENSG00000010361|FUZ	50.4	54.49	36.7	52.23	33.66	35.28	28.54	21.49	46.54	41.16	23.62	26.35	39.66	28.61	31.77	30.81	27.74	25.4	41.76	36.57	29.68	57.41	44.85	20.26	32.53	35.4	29.93	43.42	39.33	28.4	53.52	52.35	37.21	24.07	22.36	26.03
ENSG00000010379|SLC6A13	0.68	0	0.33	0.96	0.76	1.63	0.88	0.34	0.31	0.13	0.14	0	0.14	1.05	0.54	0.7	0.42	0.55	0.27	0	0.13	0.72	2.53	1.35	0.33	0.85	0.68	0.3	0.72	0.96	0.48	0.14	0.35	1.07	1.71	0.66
ENSG00000010404|IDS	33.48	29.43	196.91	32.35	158.28	167.87	154.95	125.54	93.14	43.54	116.45	154.66	53.67	128.16	159.56	59.29	26.29	145.98	36.15	106.46	163.31	50.46	61.8	141.63	57.86	64.05	129.28	35.99	57.14	122.19	38.21	43.35	119.15	55.97	48.76	120.11
ENSG00000010438|PRSS3	0	0	0	0	0	0	0	0.58	1.72	0	0	0	0	0	0	0.75	0	0	0	0	0	0	0	0	0	0	0	0	0	0.79	0	0	0	0	0	0
ENSG00000010539|ZNF200	15.65	16.77	18.2	19.31	20.51	21.74	20.92	23.41	16.47	14.8	17.55	21.19	16.37	17.33	17.62	22.38	11.68	22.84	16.98	17.68	13.64	15.47	19.02	23.81	13.44	13.89	21.42	21.95	21.53	22.84	18.66	13.16	18.43	14.1	13.47	18.96
ENSG00000010610|CD4	2.4	2.52	0.83	0.6	3.53	0	4.86	0.36	2.17	2.44	0.45	0.47	0	4.22	0	0.3	0	1.71	0.31	0	0	2.01	0.34	1.88	1.39	0.63	0.15	1.38	2.75	3.78	0	0.32	0.5	0.34	0.41	0
ENSG00000010626|LRRC23	11.75	17.99	22.06	12.88	25.32	18.81	19.17	13.81	20.07	7.74	13.72	17.2	7.06	14.62	17.56	10.37	16.01	11.68	9.99	11.09	18.8	15.99	15.19	10.66	8.2	14.98	12.89	12.69	12.03	16.56	15.29	13.32	12.32	10.9	11.5	16.19
ENSG00000010671|BTK	0.1	0.1	0.13	0.61	0.63	0.27	0	0.14	1.01	0.11	0.24	0	0	0	0.26	0	0.34	0.14	0	0	0.09	0	0	0.42	0	0.11	0.09	0.93	0.11	0.1	0	0.29	0.22	3.31	0	0.17
ENSG00000010704|HFE	0.4	1.08	0.2	1.03	0.12	0.39	0.29	1.14	0.58	0.9	0.42	0.29	1.45	1.46	0.45	0.47	2.25	0.18	0.74	0.72	0.51	2.03	2.43	0.26	2.2	1.11	0.22	1.9	1.15	0.52	1.59	1.8	0.65	0.25	0.99	0.35
ENSG00000010803|SCMH1	25.83	26.39	28.68	30.24	31.81	27.24	27.84	17.19	30.24	18.95	14.46	18.53	23.66	16.54	18.13	19.28	13.01	20.95	20.04	19.68	13.57	22.12	21.96	17.93	19.84	24.31	22.05	20.77	18.02	25.14	28.16	28.69	20.13	16.59	20.31	21.94
ENSG00000010810|FYN	263.55	265.67	264.09	264.23	305.8	250.6	320.84	289.64	304.37	343.51	347.52	240.21	353.32	297.52	207.73	399.25	242.01	304.51	351.88	277.42	204.6	334.47	328.99	347.49	384.39	325.13	295.95	315.1	357.47	410.66	348.34	356.51	489.23	418.16	318.6	456.04
ENSG00000010818|HIVEP2	5.36	5.64	18.89	5.35	16.98	14.07	11.12	7.65	13.67	5.47	6.17	28.69	6.08	12.49	45.66	14.46	5.89	61.39	4.08	5.69	26.28	28.5	18.07	54.49	12.65	12.17	44.01	8.07	9.57	33.66	13.37	9.62	36.14	15.69	14.16	36.16
ENSG00000010932|FMO1	2.45	0.11	0	1.39	0	0	1.22	0	0	0	0	0	0	0	0	0.31	4.84	0	0	0	0	1.52	3.76	0	0.74	1.43	0	0.87	2.46	0.13	1.19	3.71	0	0.67	0	0
ENSG00000011007|ELOA	33.67	37.34	34.18	30.29	35.31	36.51	37.12	36.09	40	29.17	28.88	27.62	33.67	32.47	27.71	47.4	19.83	52.09	37.25	29.31	27.37	35.21	33.45	45.4	45.25	38.71	46.47	46.2	46.08	53.3	42.75	38.94	42.58	47.97	39.83	49.84
ENSG00000011009|LYPLA2	64.79	38.77	78.4	62.17	89.37	74.92	83.52	74.09	80.05	76.19	70.12	90.8	57.65	86.78	84.5	35.29	42.29	48.09	71.61	73.61	75.62	41.66	35.54	72.88	45.69	41.85	67.39	31.87	42.6	44.5	38.55	48.07	40.05	54.53	37.25	50.06
ENSG00000011021|CLCN6	47.13	36.32	63.61	40.94	49.89	58.06	52.43	46.9	39.42	40.59	51.99	50.92	43.56	42.28	47.96	47.32	23	56.69	46.05	58.16	61.89	38.45	45.94	45.53	44.25	45.16	50.43	36.8	42.95	46.56	38.39	42.08	48.68	55.46	51.86	51.34
ENSG00000011028|MRC2	30.6	40.5	1.03	39.79	0.32	0.71	3.62	6.48	25.19	33.8	13.26	1.08	37.79	15.51	0.12	58.04	58.35	0.41	33.15	16.39	1.78	47.79	54.05	3.29	68.01	100.59	2.58	17.64	28.89	3.8	20.09	31.77	0.47	46.56	88.61	1.44
ENSG00000011052|NME1-NME2	15.6	27.66	22.81	24.45	22.27	22.59	25.28	20.66	38.27	22.64	19.49	43.28	15.75	16.21	14.44	22.56	31.61	23.65	17.57	25.38	26.39	12.86	15.54	19.2	16.73	26.26	24	13.42	15.26	26.03	7.46	9.34	7.38	17.33	11.82	23
ENSG00000011083|SLC6A7	0	0	2.29	0	1.87	1.76	0.07	0.15	0.07	0	0.07	0.39	0	0	0	0	0	0	0	0.12	0.38	0	0	0	0	0	0.8	0	0	0	0	0	0	0	0	0
ENSG00000011105|TSPAN9	13.48	11.95	26.49	17.52	20.22	16.2	24	15.17	21.57	10.89	12.84	8.12	11.2	10.51	12.9	13.64	8.45	5.73	11.6	9.85	13.03	9.76	10.82	9.82	11.61	9.68	5.71	14.6	14.86	16.82	10.75	10.2	5.96	12.25	12.27	10.84
ENSG00000011114|BTBD7	23.99	27.88	19.23	25.09	22.7	21.42	24.93	17.47	27.5	29.58	27.33	22.22	26.35	21.91	30.37	35.81	16.5	27.1	30.4	27.68	21.63	28.31	28.39	27.16	30.06	30.74	23.84	29.83	28.83	24.28	31.41	30.38	31.89	28.34	26.17	38.19
ENSG00000011132|APBA3	15.04	24.67	20.42	18.58	21.29	22.56	21.08	12.14	18.87	13.65	12.49	19.98	18.41	14.72	15.44	18.5	13.41	17.04	20.18	20.78	18.77	22.22	15.41	20.72	24.01	16.9	21.96	16.1	11.96	21.61	17.39	18.07	27.22	17.3	16.98	21.28
ENSG00000011143|MKS1	33.06	24.83	37.01	36.85	39.77	30.37	29.53	27.27	31.31	26.73	24.2	19.21	31.95	20.79	23.28	31.95	27.14	27.34	34.12	25.8	21.58	32.49	24.2	33.85	36.33	35.78	27.47	29.31	23.42	37.01	39.44	33.55	27.39	37.01	35.05	29.49
ENSG00000011198|ABHD5	14.06	14.99	20.36	14.13	24.72	22.83	17.53	21.68	15.45	15.06	14.37	15.26	18.52	13.64	13.25	18.21	9.53	16.69	18.48	13.67	14.62	20.6	27.39	21.07	12.05	13.14	13.12	17.46	22.01	19.37	22.66	17.03	15.24	16.97	11.62	16.2
ENSG00000011201|ANOS1	12.4	15.59	5.04	6.79	9.88	6.39	8.84	6.7	11.37	2.02	1.45	0.04	1.59	0.78	0.04	17.18	7.64	0.05	0.74	1.01	0.43	18.11	16.66	0.13	10.97	16.69	0.53	16.09	32.76	11.55	10.23	16.93	0.13	6.17	8.88	0.14
ENSG00000011243|AKAP8L	144	181.04	166.49	143.45	197.17	203.68	185.7	150.56	190.23	147.09	171.92	181.41	148.1	149.71	167.97	170.21	161.95	167.66	135.22	156.88	170.53	162.46	140.24	209.21	160.32	148.44	195.44	134.07	144.78	152.32	156.04	134.93	165.55	148.88	148.14	166.16
ENSG00000011258|MBTD1	59.3	56.55	55.36	54.73	58.4	59.85	58	63.43	63.54	54.17	54.45	48.68	56.52	51.51	49.82	61.4	22.94	67.53	61.68	57.56	53.72	48.77	51.61	57.51	64.57	53.93	58.8	57.61	55.65	55.71	61.97	56.4	54.89	59.55	60.27	62.5
ENSG00000011260|UTP18	70.75	62.33	54.97	62.24	44.81	57.66	53.33	56.61	58.53	55.83	73.07	64.96	59.11	59.34	52.27	53.53	68.04	59.53	62.65	64.55	66.7	54.67	54.72	67.63	59.61	49.17	60.69	51.2	54.46	61.74	50.2	49.85	55.03	54.89	54.97	65.69
ENSG00000011275|RNF216	27.22	27.88	26.92	26.48	22.53	26.89	24.63	23.54	26.29	23.9	24.95	21.79	26.5	23.48	21.7	31.18	17.57	24.21	25.93	26.1	24.72	23.16	24.12	24.46	32.66	28.66	23.24	29.98	31.13	34.83	28.72	29.22	29.94	35.68	30.3	31.45
ENSG00000011295|TTC19	68.78	71.4	84.95	67.59	79	75.97	81.04	70.11	63.82	71.62	65.3	73.12	74.33	67.76	79.66	75.14	70.64	73.98	73.6	65.46	70.33	70.75	67.54	80.42	70.49	76.01	70.99	68.28	77.13	77.58	69.2	63.79	73.42	67.2	67.41	71.18
ENSG00000011304|PTBP1	230.8	242.27	57.75	297.89	60.7	78.52	86.3	83.83	113.54	211.76	108.59	77.56	189.62	111.01	68.69	180.99	125.44	94.05	234.45	142.92	72.21	209.65	179.98	121.96	137.53	150.28	84.15	230.11	183.21	112.14	192.19	215.89	94	131.29	146.14	98.12
ENSG00000011332|DPF1	44.49	23.67	169.87	34.96	111.41	124.28	96.98	63	80.59	39.87	98.74	188.9	32.09	89.14	153.35	14.56	20.22	76.15	38.43	112.25	186.33	27.1	39.45	79.34	11.3	13.67	77.89	51.43	53.13	78.16	45.6	44.28	78.65	12.21	12.93	55.97
ENSG00000011347|SYT7	3.72	6.95	62.33	2.65	53.81	43.23	34	16.8	31.93	2.89	21.32	29.56	6.9	18.61	27.59	6.14	1.49	20.35	3.86	22.5	24.31	4.43	5.86	18.17	3.49	4.29	16.97	4.56	2.59	14.92	2.33	1.58	16.28	3.73	2.51	12.79
ENSG00000011376|LARS2	19.27	14.12	12.77	23.47	12.74	11.52	10.1	12.23	12.49	22.42	15.78	11.02	16.6	13.58	10.73	16.95	9.85	12.57	18.79	15.96	13.77	19.25	17.07	9.99	15.57	16.34	11.08	17	14.28	9.52	15.54	18.8	10.28	14.94	14.87	9.87
ENSG00000011405|PIK3C2A	49.27	48.06	29.69	97.14	36.36	36.71	36.38	28.35	41.9	45.31	25.84	17.32	44.42	29.09	19.46	69.16	14.01	40.49	46.78	35.27	26.04	52.74	80.19	35.43	66.94	53.55	29.13	48.8	47.35	42.03	40.56	45.18	49.95	53.95	56.92	33.58
ENSG00000011422|PLAUR	53.08	52.85	3.29	45	0.33	1.56	2.73	6.06	14.15	48.48	12.31	1.18	35.93	16.77	1.49	11.49	18.07	0.99	46.98	15.74	0.49	40.62	26.37	4.87	5.04	8.51	2.02	19.34	12.44	1.49	15.35	14.59	3.34	2.23	8.05	1.51
ENSG00000011426|ANLN	39.39	50.59	4.43	42.67	5.25	3.6	3.88	13.91	18.86	31.43	13.56	3.35	33.55	13.98	1.3	24.77	20.19	6.68	38.27	25.69	2.78	45.23	38.72	8.93	22.54	26.89	12.84	38.95	36.71	7.06	44.22	43.51	8.91	11.88	17.78	7.25
ENSG00000011451|WIZ	45.75	47.58	57.73	55.25	60.2	60.02	58.43	30.38	58.18	49.17	54.45	60.8	50.94	55.45	51.78	45.55	19.32	61.5	51.45	63.71	57.66	42.23	45.93	56.03	48.9	41.54	51.22	50.87	49.08	58.65	49.55	49.9	50.54	52.46	46.32	59.5
ENSG00000011454|RABGAP1	56.55	65.48	119.63	66.64	85.44	80.37	103.64	88.99	70.92	54.44	102.12	117.62	70.58	90.48	90.36	73.23	31.72	86.29	72.41	103.77	113.37	61	57.4	103.81	78.26	76.73	75.34	59.71	69.13	76.23	79.67	75.1	89.19	73.09	68.8	87.55
ENSG00000011465|DCN	0.85	0.23	7.88	4.18	1.81	5.96	1.49	1.21	1.43	0	0.47	2.45	0.9	1.34	1.81	1.53	3.54	64.98	2.76	2.52	0.79	1.25	2.44	22.69	3.45	2.75	21.02	3.03	24.78	53.36	2.51	28.43	26.29	1.6	1.93	15.56
ENSG00000011478|QPCTL	12.54	5.94	7.8	12.18	8.99	4.07	10.54	3.2	5.42	12.18	6.32	6.55	5.15	5.21	17.83	8.09	8.7	8.56	5.32	5.19	8.61	3.52	5.95	8.8	7.18	15.5	2.68	2.87	4.37	11.5	6.63	4.19	4.55	7.98	28.74	9.48
ENSG00000011485|PPP5C	87.66	92.99	111.46	95.33	101.27	96.12	108.94	92.04	87.04	87.73	104.13	99.3	83	95.2	108.42	90.24	53.3	100.41	96.28	106.17	105.54	88.13	86.67	97.33	92.56	89.01	91.24	89.62	102.48	104.17	104.97	93.35	99.22	74.89	76.58	95.56
ENSG00000011523|CEP68	27.89	26.69	31.16	25.42	34.31	30.33	45.81	32.24	36.42	23.93	25.53	24.98	24.74	29.43	28.56	30.25	10.76	30.3	25.93	29.13	30.16	26.9	29.93	26.43	26.37	25.59	36.44	39.34	46.61	32.91	40.14	38.11	40.34	28.83	29.47	30.24
ENSG00000011566|MAP4K3	43.15	33.19	60.39	47.77	71.72	63.35	61.48	55.22	55.13	36.79	53.58	64.02	42.19	50.4	53.96	54.47	32.63	46.73	42.05	51.23	62.7	48.62	54.6	56.61	54.28	51.31	56.07	43.02	42.77	59.89	45.31	51.6	61.62	65.59	55.28	55.09
ENSG00000011590|ZBTB32	0.6	0.67	0.36	0.45	1.47	0.74	0	0	0.34	0	0.17	0	0.48	0.66	0.15	4.87	0.35	1.4	0.77	0	0.15	0.32	0.6	0.18	0	0	0.45	0.33	1.26	0.6	0.14	0	0.76	0.87	0.33	0.9
ENSG00000011600|TYROBP	0	0	0	0	0	0	0	0	0	0	0	0	0	0	0	0	0	0	0	0	0	0	0	0	0	0	0	0	0	0	0	0	0	0	0	0
ENSG00000011638|TMEM159	9.06	15.73	16.39	12.95	24.12	21.03	26.9	51.26	17	16.75	22.27	31.52	13.83	15.36	27.62	19.52	20.64	12.36	8.73	11.76	19.2	30.59	23.2	14.01	16.87	17.75	13.1	24.17	15.19	7.78	21.73	21.98	13.53	11.45	13.57	5.5
ENSG00000011677|GABRA3	9	10.08	77.11	17.21	105.79	83.83	73.62	49.8	42.11	5.96	21.14	48.44	7.29	22.14	54.25	5.08	6.5	17.61	6.06	22.39	54.85	10.21	13.28	18.55	2.7	4.73	16.74	6.32	9.96	17.72	5.92	5.9	11.18	2	2.63	10.72
ENSG00000012048|BRCA1	35.36	27.2	3.49	34.43	1.61	5.55	3.65	6.63	12.79	21.41	11.44	2.24	31.04	15.43	0.74	23	15.05	0	26.3	16.51	0.71	28.65	26.56	1.05	12.01	11.87	1.57	25.42	21.77	0.42	26.84	28.29	0.81	9.49	19.47	1.77
ENSG00000012061|ERCC1	59.96	64.72	64.68	83.32	55.03	69.52	84.87	67.97	64.64	64.26	56.63	63.76	73.04	61.16	41.1	60.65	82.6	46.63	80.66	54.45	67.3	78.98	64.77	84.01	61.73	66.36	52.65	76.36	68.91	89.38	59.46	80.99	73.99	90.82	80.44	59.81
ENSG00000012124|CD22	0.94	0.87	1.07	1	0.63	3.85	1.89	1.12	3.07	1.66	1.86	3.27	3.61	0	2.77	0	0	4.61	2.75	1.73	1.69	0	1.58	2.22	0	0.94	1.78	3.15	3.17	2.39	8.4	0.95	2.22	0	1.96	2.59
ENSG00000012171|SEMA3B	10.67	12.19	11.17	13.41	8.69	18.36	8.55	7.19	6.47	5.05	2.83	8.42	6.75	3.54	5.45	8.92	3.96	14.09	8.6	5.09	4.2	8.24	6.14	12.17	8.88	6.6	15.97	17.81	13.52	32.83	7.79	7.86	25.37	17.53	8.99	28.44
ENSG00000012174|MBTPS2	16.05	15.67	24.28	15.7	26.13	24.34	22.02	21.67	18.73	18.96	20.81	27.81	19.48	21.97	26.74	23.66	14.76	22.55	17.79	20.35	22.1	17.08	21.45	24.29	24.04	23.24	17.26	18.43	20.06	21.1	18.16	20.71	15.99	19.11	23.81	19.57
ENSG00000012211|PRICKLE3	2.49	0.39	0.69	0.26	1.26	0.14	0.48	0.16	0.36	1.25	0.35	0.55	0.99	0.15	0.22	0.45	0.78	0.44	0.46	0	1.76	0.55	0.31	0.96	1.11	0.14	0.64	2.16	0.26	0.94	0.93	0.35	0.14	0	0.99	0
ENSG00000012223|LTF	0	0	0	0	0	0	1.34	0.29	0	0	0	0	0	0	2.31	0	0	0	0	0	0	0	0	0	0	0	0	0	0	0	0	0	0	0	0	0
ENSG00000012232|EXTL3	42.54	43.82	53.09	48.12	50.39	38.36	48.6	44.49	47.17	49.29	55.76	61.96	51.19	60.6	54.89	45.07	33.18	43	52.98	48.35	53.8	51.07	58.7	51.83	53.2	48.37	44.73	45.76	52.08	67.04	46.86	45.7	65.14	49.05	62.84	48.55
ENSG00000012504|NR1H4	0	0	0	0	0	0	0	0	0	0	0	0	0	0	0	0	0	0	0	0	0	0	0	0	0	0	0	0.31	0.35	0	0.48	0.49	0	0	0	0
ENSG00000012660|ELOVL5	109.23	89.82	78.69	113.43	60.57	62.58	61.75	81.79	74.82	100.48	95.44	74.6	105.43	85.09	73.82	74.91	60.01	64.81	104.41	95.95	86.69	97.98	85.71	60.08	63.18	71.22	67.34	93.17	91.16	58.05	80.55	89.05	47.16	55.7	60.61	56.11
ENSG00000012779|ALOX5	0	0.12	0.12	0.2	0	0	0	0.36	1.6	0	0	0	0	0	0	0	0	0	0	0	0	0	0	0	0	0	0	0	0.8	0	0	0.14	0	0	0	0
ENSG00000012817|KDM5D	0.39	0	0.93	0.42	0.55	0	0	0	0	0	0	0.49	0	0.9	0	0	0	0	0.4	0.44	0.05	0	0	0.06	0	0	0	1.29	0.83	0.39	0	1.71	0.06	0.45	0.43	0
ENSG00000012822|CALCOCO1	46.47	52.99	115.21	55.36	135.61	112.27	127.54	104.59	143.52	75.39	91.44	114	66.88	91.47	122.83	135.13	78.6	123.7	87.08	91.75	111.52	109.84	116.43	140.02	153.2	107.36	128.58	112.29	102.16	116.64	149.52	117.12	171.9	149.53	139.41	148.84
ENSG00000012963|UBR7	43.76	43.02	36.99	46.84	28.51	38.95	35.37	46.32	34.86	41.27	42.51	37.48	52.53	47.66	37.35	39.25	25.83	31.26	43.91	42.47	43.69	41.76	53.57	33.74	35.76	32.75	30.35	51.91	51.03	41.7	54.78	53.66	35.22	34.33	34.73	37.2
ENSG00000012983|MAP4K5	86.85	82.21	88.28	84.13	114.82	105.34	98.88	79.27	96.21	70.45	82.48	83.21	72.49	86.15	77.22	87.89	45.47	104.91	77.28	81.23	83.13	90.64	92.22	89.26	75.8	87.43	88.85	96.1	85.65	109.29	103.96	117.89	107.02	96.82	77.91	116.88
ENSG00000013016|EHD3	4.64	4.13	8.99	5.32	6.83	7.61	7.52	6.8	6.85	6.66	6.51	10.18	5.25	7.11	9.68	4.44	2.17	6.15	4.16	7.92	8.43	4.62	3.97	5.53	4.12	4.13	5.74	3.2	4.66	7.15	3.12	5.02	4.66	3.2	3.97	4.18
ENSG00000013275|PSMC4	105.9	86.39	97.37	88.76	88.57	88.19	103.55	109.82	84.82	107.44	86.21	90.45	80.93	78.6	84.64	104.91	103.35	102.82	96.03	98.7	96.93	97.17	79.31	95.66	108.58	100.43	97.48	95.7	91.01	103.09	87.44	79.3	88.96	104.5	100.15	100.29
ENSG00000013288|MAN2B2	6.03	5.52	12.67	6.07	10.68	11.46	12.9	9.46	10.55	7.48	11.87	16.17	8	11.64	17.53	8.5	7.18	12.42	8.08	14.02	15.76	8.39	10.3	11.7	9.8	8.34	11.54	8.04	9.6	11.5	7.86	8.67	12.27	9.86	9.29	11.69
ENSG00000013293|SLC7A14	0.29	1.7	7.94	0.52	9.08	5.81	4.96	3.68	2.94	0.09	0.79	1.74	0.14	1.88	1.62	0.02	0.03	0.85	0.18	2.3	2.13	0.16	0.07	0.42	0.07	0.16	0.52	0.39	1.15	0.62	0.32	1.85	2.14	0.07	0.15	0.13
ENSG00000013297|CLDN11	0.39	0.99	0.55	0.76	1.39	0.28	1.76	0.36	0.62	1.07	0.31	0.58	0	0.46	0.45	0	0.75	0.56	0.84	1	0.14	0.88	0.38	0.51	0.33	0.49	0.56	0.71	1.19	0.57	0.31	1.83	0.17	0.16	0.32	0.41
ENSG00000013306|SLC25A39	62.59	55.8	59.3	75.69	77.15	66.21	60.03	65.5	45.41	65.58	74.78	95.39	59.27	79.61	89.49	60.41	63.81	65.28	68.54	78.72	87.12	55.98	64.94	76.34	63.47	63.32	81.32	52.06	59.55	62.99	56.59	56.84	80.95	59.05	60.51	80.67
ENSG00000013364|MVP	4.19	6.06	9.51	4.08	8.28	15	7.85	4.99	8.4	3.74	4.42	3.71	2.21	1.61	4.22	3.73	4.35	10.21	1.53	3.16	3.33	8.75	9.27	5.01	7.74	6.37	8.26	85.11	3.42	8.86	5.23	3.14	4.71	7.22	3.73	14.62
ENSG00000013374|NUB1	72.41	78.89	66.31	64.04	102.76	85.51	61.9	82.83	76.43	69.72	69.54	54.16	66.29	68.94	61.51	86.45	37.99	110.17	77.64	76.19	54.31	81.02	79.79	105.58	88.42	64.62	85.64	77.08	93.7	112.18	77.8	91.81	121.55	86.47	69.16	87.83
ENSG00000013375|PGM3	46.17	33.31	21.22	47.35	24.14	27.53	23.3	26.84	29.52	34.37	64.02	22.66	66.61	24.82	16.71	84.83	48.58	35.89	44.66	26.79	20.73	49.61	52.1	28.26	148.59	120.54	25.09	35.01	42.23	36.42	38.94	45.62	26.82	134.77	174.4	22.95
ENSG00000013392|RWDD2A	5.74	5.54	9.06	5.93	10.56	7.77	6.61	6.3	4.46	6.21	7.6	11.82	7.46	7.2	10.72	13.33	8.4	9.19	7.1	6.44	9.99	7.86	5.46	7.42	14.01	17.88	9.03	8.27	8.94	9.27	6.03	6.19	6.89	14.75	14.88	7.92
ENSG00000013441|CLK1	252.15	284.91	259.66	206.69	362.18	395.5	373.48	342.39	370.3	258.42	351.55	343.27	317.72	300.79	334.43	424.65	439.6	461.53	305.88	333.87	358.07	381.93	379.47	506.54	355.37	341.75	439.02	408.55	434.31	504.62	398.34	349.68	554.39	446.93	359.06	499.17
ENSG00000013503|POLR3B	7.64	5.87	9.56	5.39	11.85	12.16	10.97	11.69	6.95	6.97	9.31	7.44	6.25	7.95	5.95	14.85	5.97	8.33	10.05	7.97	8.16	4.99	7.12	7.5	11.25	8.4	10.07	9.2	10.35	11.61	7.76	8.24	9.35	10.67	11.1	12.11
ENSG00000013523|ANGEL1	18.77	17.27	16.85	21.51	29.31	18.5	16.45	12.34	17.85	22.01	11.45	10.67	22.05	15.77	18.07	22.07	12.68	21.51	21.49	14.24	13.1	22.38	21.58	17.24	20.05	20.46	23.31	31.67	26.09	19.37	34.32	37	25.2	14.13	15.25	19.44
ENSG00000013561|RNF14	36.46	33.71	55.76	34.28	49.31	57.47	43.95	49.37	34.99	41.64	49.04	45.02	37.56	43.09	56.65	63.67	35.71	56.73	30	46.46	47.9	39.63	52.78	63.72	62.91	53.15	60	62.97	69.84	85.44	42.88	48.31	72.04	52.54	56.41	72.81
ENSG00000013563|DNASE1L1	9.26	13.96	5.84	14.1	7.52	6.92	8.4	10.06	9.17	14.28	5.3	4.12	11.07	8.26	5.54	9.52	7.71	7.17	12.76	8.8	2.72	10.29	6.47	7.06	8.8	9.52	17.15	43.18	4.47	7.86	5.91	3.57	11.35	8.15	18.09	12.12
ENSG00000013573|DDX11	174.18	163.68	61.66	162.76	82.16	62.93	57.96	57.77	103.68	110.67	75.53	48.07	107.16	77.79	42.8	125.72	66.79	61.24	146.31	88.77	53.75	158.31	163.65	63.8	89.14	119.03	61.93	159.59	142.16	64.76	251.32	215.86	63.74	99.54	100.97	75.27
ENSG00000013583|HEBP1	26.94	38.23	8.37	35.17	7.57	6.91	7.58	11.49	18.7	27.76	12.13	9.22	25.57	13.12	6.03	12.69	32.58	10.9	20.19	13.77	6.12	31.64	18.31	9.84	17.04	24.42	13.33	10.09	8.83	11.7	9.48	8.54	12.73	15.16	17.14	12.52
ENSG00000013588|GPRC5A	0.36	1.06	0.45	0.09	0.2	0.17	0.36	0.07	0.07	0.06	0.03	0.11	0.45	0.03	0.06	0.43	0.07	0.41	0.19	0.09	0.94	0.25	0.14	0.26	0.42	0.16	0.18	0.16	0.5	1.29	0.32	0.16	0.15	0.24	0.4	0.38
ENSG00000013619|MAMLD1	18.59	18.2	15.48	22.73	10.57	11.65	11.85	9.96	15.61	24.97	13.88	27.57	21.48	16.69	31.37	11.12	10.56	12.02	26.22	19.39	26.44	15.4	13.6	10.86	9.98	11.29	10.89	11.64	11.82	11.29	6.98	10.61	9.71	6.12	6.15	8.73
ENSG00000013725|CD6	0	1.26	0	0.5	0.1	0.09	2.15	0	0.25	0	0	0	0	0	0	0.07	0	0.1	0	0.08	0	0	0.07	0.52	0.17	0	1.14	0.08	1.02	0.94	0.13	0	4.44	0.08	0	0.22
ENSG00000013810|TACC3	91.23	114.12	3.47	103.43	5.47	6.56	12.64	16.35	51.32	76.99	29.28	1.44	66.97	35.61	1.51	47.65	62.41	3.12	80.75	49.95	3.06	94.54	76.7	1.78	26.17	52.33	4.29	88.58	52.79	4.65	86.02	93.21	2.77	17.25	31.3	1.68
ENSG00000014123|UFL1	34.76	31.71	17.58	31.52	19.84	13.97	17.66	21.82	21.82	27.48	15.84	13.47	27.31	18.62	14.92	43.22	21.22	18.36	28.29	18.92	15.76	30.74	27.42	17.81	44.03	44.82	19.04	26.66	28.49	24.15	27.64	27.49	19.96	36.15	38.77	19.8
ENSG00000014138|POLA2	24.37	20.23	5.41	22.85	5.08	5.46	2.8	5.1	4.81	16.83	13.64	2.81	19.53	8.8	4.43	11.1	21.95	7.41	32.06	18.78	6.77	22.33	24.57	2.59	6.81	13.35	3.03	22.6	16.48	3.34	25.69	26.03	3.99	6.58	8.98	4.85
ENSG00000014164|ZC3H3	10.96	13.52	15.35	16.44	15.09	16.17	17.43	9.76	16.45	11.62	15.43	13.75	13.95	16.26	13.76	12.23	8.06	13.88	12.92	13.28	13.83	9.93	10.64	13.2	14.39	14.2	13.96	13.31	11.65	15.16	13.69	13.85	13.98	14.28	14.69	15.99
ENSG00000014216|CAPN1	39.82	45.54	75.25	53.33	76.34	98.05	85.08	74.43	69.31	53.55	82.23	106.63	65.72	97.36	109.63	79.42	49.92	82.21	52.69	96.5	84.19	69.61	75.36	112.85	81.19	62.14	82.02	60.27	63.91	75.97	69.62	68.91	101.14	80.25	71.9	83.89
ENSG00000014257|ACPP	0	0	0	0.15	0	0	0	0	0	0.14	0.9	0	0	0	0	0.47	0.34	0	0.08	0	0	4.74	0.66	0	0.17	0	0	0	0	0.15	0.21	1.32	0	0	0	0
ENSG00000014641|MDH1	150.16	159.25	248.77	150.53	238.32	215.53	186.24	200.71	162.4	141.45	176.89	222.73	134.28	192.96	230.16	109.81	157.21	193.45	129.78	181.09	285.52	137.42	130.28	167.27	109.53	117.66	192.52	97.23	104.26	130.12	114.26	128.49	119.39	86.84	81.77	153.94
ENSG00000014824|SLC30A9	81.53	65.25	97.49	59.84	104.73	94.99	83.38	97	73.83	75.95	71.32	111.23	66.44	73.73	103.77	78.9	70.68	101	77.68	82.02	95.39	72.7	69.78	61.83	79.28	76.99	83.11	84.31	83.4	87.33	73.17	75.74	85.75	83.85	77.11	87.2
ENSG00000014914|MTMR11	4.3	7.21	1.44	11.15	2.61	1.13	1.48	1.07	3.14	8.21	6.78	5.23	15.09	6.8	4.91	20.98	14.68	7.99	12.88	4.97	1.72	21.69	23.39	5.48	19.2	26.04	2.99	11.73	10.98	5.64	12.09	13.96	4.24	12.32	16.66	6.02
ENSG00000014919|COX15	36.23	30.57	32.45	38.47	49.7	48.64	44.8	36.06	54.38	36.67	27.39	37.68	37.9	28.81	39.86	53.01	24.87	41.85	32.84	43.68	49.69	37.4	37.77	36.01	43.66	35.4	45.32	44.82	37.52	44.49	50.12	39.55	41.25	55.68	52.97	40.31
ENSG00000015133|CCDC88C	24.32	40.11	19.85	30.78	16.72	18.75	20.47	20.98	22.56	35.45	40.43	9.54	37.74	32.03	6.71	58.72	19.88	39.37	41.97	30.8	11.98	41.8	38.9	51.87	54.49	40.14	38.6	27.78	30.17	38.03	36.4	25.26	46.02	49.35	31.8	48.43
ENSG00000015153|YAF2	31.38	39.83	47.8	28.93	51.36	44.78	31.32	43.76	51.99	28.91	34.63	40.58	36.92	26.23	36.16	53.98	41.08	38.08	26.55	43.02	40.16	42.71	49.32	39.69	42.34	47.18	40.12	44.52	46.55	48.05	39.3	51.85	30.87	41.06	41.08	39.66
ENSG00000015171|ZMYND11	70.18	61.32	122.68	76.98	116.71	111.91	92.18	100.12	73.77	83.52	79.05	120.89	70.57	80.22	115.66	98.33	53.39	119.22	72.7	80.5	116.19	79.08	88.34	97.45	94.43	90.89	110.93	93.53	108.1	109.32	94.06	97.1	105.74	88.9	94.45	108.21
ENSG00000015285|WAS	1.92	1.61	2.17	1.17	2.59	2.19	2.02	1.36	2.58	0.14	0.66	2.3	1.34	0.82	1.04	0.57	1.67	2.66	1.82	0.32	0.14	0.85	0.13	1.36	1.75	2.28	1.46	1.04	1.21	2.68	0.75	0.82	1.05	2.01	3.31	1.11
ENSG00000015413|DPEP1	0.17	3.29	0	0	0.24	0	0	0	0	0	0	0	0	0	0	0	0	0	0	0	0	0.54	0	0.18	0	0	0	0	0	0	0	0	0	0	0	0
ENSG00000015475|BID	28.98	24.82	32.86	17.74	21.55	30.51	25.73	28	30.06	32.74	29.66	33.17	34.31	33.49	32.96	27.71	19.09	37.71	30.21	21.96	36.31	17.92	20.14	34.14	33.35	23.78	50.87	24.45	27.43	61.09	24.87	25.88	43.68	30.47	26.59	38.55
ENSG00000015479|MATR3	852.16	651.08	1071.61	723.31	1111.63	1112.33	1003.72	1154.86	873.19	796.49	878.85	1012.48	813.71	917.93	996.74	667.82	663.71	873.73	817.88	1015.6	1057.44	725.82	779.23	941.23	641.19	575.52	787	776.76	828.66	891.46	823.29	826.37	870.53	664.57	618.28	805.55
ENSG00000015520|NPC1L1	0	0.19	0.06	0	0.2	0.17	0	0.07	0	0.18	0.12	0.24	0	0.12	0.23	0.05	0.18	0	0.05	0.05	0	0.12	0.17	0.2	0.11	0.1	0.52	0.05	0.12	0.05	0	0	0.24	0	0	0.56
ENSG00000015532|XYLT2	18.22	17.27	12.4	17.13	11.85	12.1	13.21	7.81	10.75	16.68	10.32	14.09	13.46	13.1	10.35	13.95	19.91	13.16	15.05	14.67	15.55	24.49	13.72	15.11	15.4	14.86	14.57	12.22	14.91	14.73	14.86	16.39	12.67	16.09	13.6	17.65
ENSG00000015568|RGPD5	23.59	40.18	24.95	20.55	28.85	16.4	31.14	20.88	21.39	17.88	17.45	12.86	8.9	12.43	14.94	24.59	10.44	28.29	9.05	17.1	13.78	12.2	18.06	18.57	45.5	23.09	55.84	52.22	15.07	14.16	18.34	16.37	24.25	28.27	31.93	21.57
ENSG00000015592|STMN4	119.25	105.6	728.98	113.16	762.59	799.19	617.63	603.47	588.68	142.61	461.79	713.36	181.74	425.35	729.55	164.02	337.28	654.15	121.59	348.57	583.12	233.69	317.92	823.04	117.82	143.26	601.49	120.99	189.52	523.98	170.36	190.74	577.68	79.36	91.25	424.28
ENSG00000015676|NUDCD3	64.02	53.38	107.93	58.67	94.58	101.95	84.89	93.79	100.4	54.96	70.74	91.99	65.45	70.46	73.72	74.28	52.84	102.03	73.15	107.22	103.95	65.13	71.32	97.51	64.78	57.97	86.09	57.22	64.09	101.43	69.69	58.81	107.39	82.2	68.22	102.09
ENSG00000016082|ISL1	1.28	0.87	6.98	0.58	19.9	38.85	31.23	28.42	19.62	0.1	0.11	1.01	0	0	0.32	0	0	0	0	0.11	1.35	0	0.09	0	0	0	0.1	0.32	0.65	1.58	0.94	0	0	0	0	0.1
ENSG00000016391|CHDH	0.84	0.97	0.34	0.74	0.24	0.32	0.7	0.28	1.13	0.6	0.18	0.22	0.61	0.41	0.78	2.07	1.48	0.76	0.39	0.45	0.21	1.73	2.44	0.92	0.96	1.15	0.62	2.82	2.89	1.52	1.79	2.24	1.41	2.08	1.22	1.57
ENSG00000016402|IL20RA	0	0.06	0	0	0	0	0	0	0	0	0	0	0	0	0	0	0.36	0	0	0	0	0	0	0	0	0.07	0	0.08	0.22	0	0	0.08	0	0	0.08	0
ENSG00000016490|CLCA1	0	0	0	0	0	0	0	0	0	0	0	0.1	0	0	0	0	0	0	0	0	0	0	0	0	0	0	0	0	0.08	0	0.14	0	0	0	0	0
ENSG00000016602|CLCA4	0	0	0	0	0	0	0	0	0	0	0	0	0	0	1.22	0	0	0	0	0	0	0	0	0	0	0	0	0	0	0	0	0	0	0	0	0
ENSG00000016864|GLT8D1	83.74	68.2	107.51	102.45	84.01	94.94	83.91	83.49	82	83.45	83.36	89.27	83.18	81.6	115.93	73.09	71.56	101.87	65.38	95.38	93.89	79.94	81.22	74.64	94.71	88.46	102.85	94.36	76.27	99.87	85.65	91.54	110.04	78.52	92.99	105
ENSG00000017260|ATP2C1	88.16	74.91	150.34	79.44	163.08	142.18	150.56	109.35	117.66	84.65	131.65	164.86	86.18	113.38	179.86	85.39	77.91	127.09	84.92	134.27	168.88	80.57	99.96	113.68	105.81	98.08	122.97	84.91	96.94	112.47	107.15	107.66	115.43	82.99	81.38	101.12
ENSG00000017427|IGF1	2.64	0.51	0.68	22.08	1.85	1.49	0.67	4.13	0.53	0.09	0.03	0.19	0.06	0	0	0	0	0.08	3.1	0.14	0.06	0.06	0.14	1.15	0.21	0.13	0.12	0.13	0.29	1.85	0.08	0	0.71	0.27	0.07	0.06
ENSG00000017483|SLC38A5	3.87	5.66	6.84	4.65	4.59	4.75	5.6	5.82	4.85	2.67	7.5	9.16	6.52	6.52	8.34	4.45	15.47	16.25	3.44	5.22	1.54	5.49	3.64	14.28	12.09	3.83	22.96	13.02	7.58	45.68	2.59	2.98	17.14	5.95	4.15	19.43
ENSG00000017797|RALBP1	38.73	39.05	31.64	39.47	40.36	43.5	37.15	31.27	36.57	34.9	41.22	38.08	32.68	40.51	38.53	36.19	44.55	51.53	36.61	34.71	29.21	45.72	47.29	54.21	43.16	37.51	43.19	51.65	45.35	59.83	49.88	46.74	61.46	40.11	35.91	56.23
ENSG00000018189|RUFY3	141.09	145.29	304.69	152.39	339.66	298.37	320.92	258.79	211.51	162.62	210.1	222.66	155.98	203.68	216.21	205.73	159.94	215.71	142.9	214.44	218.01	194.77	206.21	227.32	205.71	198.91	220.2	162.6	222.8	236.84	209.03	194.75	238.03	180.11	202.14	220.81
ENSG00000018236|CNTN1	5.55	2.3	145.98	1.48	90.05	117.21	44.42	62.06	28.18	0.92	23.68	162.92	1.98	21.98	201.16	0.79	0.54	37.65	1.59	26.36	179.76	2.62	1.64	31.31	0.65	1.65	39.83	23.29	43.44	17.99	14.56	28.31	2.57	1.59	0.09	9.82
ENSG00000018280|SLC11A1	0.06	0.65	1.05	0.16	0.57	0.18	1.2	0.72	0.76	0.43	0.16	0.42	0.08	0.3	0.64	0.15	0.21	0.21	0.38	0.24	0.06	0.63	0.19	0.32	0.45	0.27	0.24	0.41	0.44	0.39	0.35	1	0.29	1.77	0.04	0.45
ENSG00000018408|WWTR1	11.2	9.68	3.53	8.02	0.86	1.2	2.81	5.14	3.78	7.91	4.64	0.47	7.58	3.51	0.8	23.54	8.35	1.1	2.95	3.01	0.49	17.88	15.57	2.06	14.78	15.14	3.06	41.02	23.2	4.48	31.08	25.45	1.16	11.19	14.36	0.31
ENSG00000018510|AGPS	24.9	21.54	34.3	23.34	24.79	30.69	22.02	23.41	22.6	17.02	28.69	27.28	20.51	20.48	28.11	22.07	8.93	22.74	22.38	22.3	26.48	17.8	18.64	20.87	18.46	17.65	18.21	15.77	18.87	20.12	17.88	18.81	17.01	16.43	14.44	18.12
ENSG00000018610|CXorf56	29.29	30.74	26.57	34.44	47.44	43.69	33.43	20.58	25.04	26.6	32.02	33.72	31.27	31.44	31.1	42.38	30.42	36.63	27.11	27.18	34.59	30.22	29.33	40.68	39.3	40.51	46.61	47.75	42.87	48.27	39.12	34.83	48.65	41.29	48.11	45.1
ENSG00000018625|ATP1A2	8.96	24.39	0.5	17.35	0.12	0.83	4.6	9.43	5.57	28.29	11.06	1.53	32.59	15.64	0.05	84.96	76.29	0.1	18.51	12.07	0.63	104.16	91.36	1.74	61.95	93	1.6	56.07	80.95	3.45	50.97	64.75	0.26	26.52	36.37	1.48
ENSG00000018699|TTC27	13.97	19.12	9.09	13.99	9.54	7.06	5.8	10.8	8.94	13.45	12.88	12.99	17.2	11.31	11.86	17.46	32.78	13.2	12.62	17.97	13	15.94	11.42	14.53	21.14	19.38	11.77	19.62	15.55	13.91	17.54	12.68	12.99	21.06	34.81	13.74
ENSG00000018869|ZNF582	8.51	9.49	7.56	12.13	8.1	12.51	6.52	8.06	8.51	8.16	6.68	7	8.25	5.79	7.43	13.61	6.72	11.49	7.09	7.86	8.3	10.66	11.62	7.49	16.06	10.77	14.01	10.51	8.66	14.24	9.09	8.21	9.85	13.45	13.54	11.9
ENSG00000019102|VSIG2	0.26	0	0.59	0	0	0.3	0.52	0	0	0	0	0	0	0	0	0	0.19	0	0	0.3	0	0.52	0	0	0	0	0.26	0	0	0	0.23	0	0	0.3	0	0
ENSG00000019144|PHLDB1	45.75	62.04	141.91	59.28	201.09	158.99	138.64	73.19	111.75	53.74	70.56	112.98	53.27	70.15	122.71	63.45	43.37	106.35	61.98	66.49	102.84	60.12	73.28	109.18	65.58	65.85	118.96	95.42	123.12	96.37	100.3	126.38	99.2	79.81	55.12	109.7
ENSG00000019169|MARCO	0	0	0	0.14	0	0	0	0	0	0	0	0	0	0	0	0	0	0	0	0	0	0	0	0	0	0	0	0	0	0	0	0	0	0	0	0
ENSG00000019186|CYP24A1	0.11	0	0.13	0.07	0.82	0	0	0.09	0	0	0	0	0	0	0	0	0	0	0.23	0	0	0	0	0	0	0	0	0	0	0	0	0	0	0.65	0	0
ENSG00000019485|PRDM11	6.55	6.34	6.12	8.75	9.18	5.5	4.76	4.4	5.63	5.69	4.77	3.34	6.49	3.87	5.51	11.52	2.62	8.68	6.43	5.61	3.5	5.93	7.74	8.66	7	7.12	6.57	6.4	7.72	10.26	5.29	5.17	8.99	7.15	6	9.22
ENSG00000019505|SYT13	7.65	6.15	201.25	10.56	189.83	204.11	127.88	87.7	95.58	3.07	51.59	149.51	5.12	50.78	129.52	1.29	3.13	97.01	2.47	40.48	119.88	1.49	7.62	81.82	1.91	2.34	86.45	0.96	7.29	53.85	0.68	2.32	58.07	0.5	0.63	61.89
ENSG00000019549|SNAI2	1.64	2.38	1.09	1.38	1.61	0.94	2.97	2.44	1.54	0.17	0.28	0.16	0.81	0.14	0	1.43	1.56	0.58	0.94	0.43	0	2.72	1.17	0.61	1.13	1.61	0.76	1.57	1.91	4.06	1.75	2.13	3.82	0.46	0.98	1.79
ENSG00000019582|CD74	2.5	1.93	1.81	3.18	0	0.95	1	2.11	3.42	0.75	0.29	0	2	0.58	0.45	0.42	0	0.36	0.97	4.03	0.26	0.87	0	0.96	0.31	0.93	0.53	1.2	0	1.99	0.34	0	0.64	0	0.58	0.52
ENSG00000019991|HGF	0.49	0.29	0.77	0.25	0	1.27	0.38	0.95	0.43	1.25	1.3	7.62	0.7	1.76	4.03	5.93	2.06	1.05	0.04	1.79	7.17	7.51	9.68	0.88	3.86	10.62	0.87	4.8	4.1	3.16	0.74	2	2.73	7.88	12.09	4.9
ENSG00000019995|ZRANB1	24.2	29.77	34.45	27.67	38.63	42.92	38.71	26.82	36.52	26.99	31.81	35.38	29.35	31.9	32.06	37.45	19.45	46.81	28.06	30.61	30.66	34.79	36.14	37.83	35.73	30.84	42.9	36.13	34.42	47.38	34.44	30.26	42.93	34.76	32.61	45.53
ENSG00000020129|NCDN	16.64	14.1	85.06	15.2	59.67	67.73	64.64	42.15	29.04	21.61	39.24	67.01	18.06	35.89	69.55	20.92	10.52	40.83	16.16	35.78	78.74	17.6	20.13	40.5	19.54	20.97	42.84	15.98	19.34	35.33	14.86	15.71	41.99	23.42	26.39	38.31
ENSG00000020181|ADGRA2	0.17	2.82	0.72	0.17	0.8	1.09	0.59	0.15	2.01	0.09	0.33	0.41	0.95	0.51	0.24	0.04	0.03	1.42	0.09	0.65	0.24	0.21	0.2	1.13	0.15	0.13	0.61	7.43	2.01	2.96	0.26	0.35	1.52	0.19	0.14	0.65
ENSG00000020256|ZFP64	19.84	22.91	15.85	25.06	15.24	15.29	20.16	20.78	16.82	19.36	21.37	20.23	19.87	26.42	16.62	21.72	14.53	22.5	21.18	21.26	18.27	17.96	17.54	23.27	16.21	15.01	18.97	13.43	16.15	21.02	17.5	17.72	16.89	16.88	14.82	18.75
ENSG00000020426|MNAT1	61.59	55.83	60.35	76.98	73.83	60.28	56.43	57.03	67.54	53.05	51.56	49.14	59.79	97.58	59.02	63.97	56.12	63.65	72.89	53	59.1	65.35	42.63	51.34	45.86	43.25	45.8	84.68	64.35	65.7	62.43	66.42	62	41.35	63.64	62.4
ENSG00000020577|SAMD4A	3.4	7.76	1.12	4.1	1.4	2.32	1.46	1.08	8.82	13.15	3.42	0.52	17.32	7.07	0.28	37.66	12.25	1.36	9.06	3.85	0.38	26.53	21.8	1.74	33.2	32.67	2.36	6.88	10.39	1.45	10.14	12.57	1.4	25.7	31.51	1.8
ENSG00000020633|RUNX3	0	0.05	0	0.06	0	0	0	0.07	0	0	0	0	0	0	0	0	0	0.08	0	0	0	0	0	0	0	0.06	0	0	0	0.09	0	0.07	0.12	0	0	0
ENSG00000020922|MRE11	32.69	29.09	9.24	25.5	9.43	13.32	11.95	15.88	15.63	18.38	13.3	10.24	19.88	15.07	12.81	19.16	9.11	14.08	19.19	18.45	11.58	16.98	20.3	9.96	13.19	20.15	11.77	21.53	20.96	13.75	28.14	24.25	16.38	10.84	10.61	11.68
ENSG00000021300|PLEKHB1	9.32	11.51	1.03	5.01	2.31	0.72	0.8	2.16	3.67	13.91	2.63	0	8.56	2.94	0.12	6.03	8.06	0	4.19	2.66	0.91	13.53	10.2	1.1	3.48	7.32	0.25	21.76	22.92	47.85	5.18	10.05	0	1.95	3.8	0.25
ENSG00000021355|SERPINB1	1.83	1.19	1.32	0.92	0.91	0.52	0.45	0.45	1.03	0.91	0.36	0.47	0.35	0.51	0.64	1.22	0.86	0.96	0.45	0.32	0.7	0.88	0.69	0.67	0.54	1.08	0.46	1.42	0.2	1.65	0.92	1.03	1.14	0.21	0.51	1.1
ENSG00000021461|CYP3A43	0	0.39	0	0.23	0.48	0.28	0.75	0.17	0.72	0.3	0.31	0.18	0.15	0	0	0.27	0.22	0.19	0.14	0.16	0	0.15	0.13	0	0.73	0.3	0	0	0.12	0.16	0	0.31	0.17	0	0.31	0
ENSG00000021488|SLC7A9	0.63	0.39	4.31	0.6	2.54	2.39	2.55	2.27	4.66	1.05	4.9	3.48	2.16	0.82	2.56	2.58	0.12	2.1	1.74	2.78	0.88	1.04	2.26	2.16	1.05	1.06	3.54	0.78	1.23	2.24	0.81	1.79	2.72	1.06	0.93	1.9
ENSG00000021574|SPAST	64.18	49.79	104.43	56.49	119.7	109.99	114.36	92.87	87.2	52.13	104.79	95.12	62.74	95.5	93.49	72.1	51.49	96.19	56.94	103.76	106.97	58.35	71.85	90.18	75.17	56.59	92.14	67.02	84.22	87.19	70.83	75.06	75.87	76.86	58.24	85.65
ENSG00000021645|NRXN3	16.08	13.06	25.09	9.08	31.11	35.41	20.04	21.91	55.22	3.2	2.18	3.66	3.46	1.31	5.52	4.76	3.23	0.07	4.5	2.26	3.5	9.84	24.38	1.19	3.25	3.28	0.57	41.75	53.19	9.79	36.78	50.44	2.64	4.65	2.66	0.26
ENSG00000021762|OSBPL5	16.76	15.03	45.82	16.13	42.95	48.4	32.21	27.42	33.31	21.05	45.98	48.16	28.89	46.63	44.74	24.46	16.67	65.22	22.67	44.04	40.63	24.59	35.06	80.82	21.39	17.26	48.35	18.03	20.18	45.8	28.89	27.73	82.8	32.56	21.39	54.32
ENSG00000021776|AQR	36.73	29.22	30.13	31	30.45	27.06	26.11	29.12	26.07	32.08	27.79	25.95	33.51	26.34	24.73	37.72	11.59	27.96	32.33	25.29	27.19	25	31.41	23.06	36.84	39.92	26.35	33.22	28.45	32.84	39.76	33.24	30.92	40.91	35.03	29.96
ENSG00000021826|CPS1	5.32	11.89	4.24	8.66	4.57	2.14	6.13	5.82	4.02	5.02	2.19	1.89	1.86	3.04	0.61	0.85	1.35	1.46	1.53	6.91	0.76	1.16	5.17	0.34	0.72	2.03	0.36	3.82	4.66	1.16	1.46	3.21	0.24	1.09	2.14	0.33
ENSG00000021852|C8B	0	0	0	0	0	0.3	0	0	0	0	0	0	0	0.14	0	0.13	0	0	0	0	0	0.26	0	0	0	0	0	0	0	0	0.11	0	0	0	0	0.12
ENSG00000022267|FHL1	165.19	127.19	189.91	220.21	279.9	216.56	201.1	164.24	168.79	99.05	135.11	154.33	121.15	136.52	163.77	132.21	101.54	204.66	126.49	145.4	148.7	135.96	143.47	206.98	103.04	121.14	220.53	92.66	129.39	138.09	94.2	119.38	152.63	97.51	100.63	199.58
ENSG00000022277|RTF2	148.39	110.91	143.82	113.22	144.74	127.57	120.04	150.3	123.11	130.7	145.8	139.94	126.77	135.79	133.78	123.89	134.36	115.38	139.23	115.5	132.93	108.82	111.28	109.45	97.92	119.31	112.19	135.19	156.17	127.89	132.67	149.09	120.54	118.53	114.32	102.04
ENSG00000022355|GABRA1	0.06	0.06	4.59	0.29	13.82	13.76	5.18	0.55	8.4	0	0.17	1.12	0	0	0.38	0	0	0.87	0.07	0	1.56	0	0	1.1	0	0.13	1.05	1.25	0.36	1	0	0	0	0.13	0.12	0.3
ENSG00000022556|NLRP2	0	0	0	0	0	3.36	0	0	0.16	0.13	0	0.63	0	0	0	0	0.61	0	0	0.16	2.59	0	0	1.15	0	0	2.45	0	0	0.31	0	0	0.09	0	0	0
ENSG00000022567|SLC45A4	8.08	6.22	11.17	11.79	8.08	8.51	10.46	6.59	6.63	8.33	10.11	7.82	6.04	7.01	8.85	8.66	5.78	7.91	11.89	7.78	8.54	6.31	5.4	14.11	10.62	4.68	12.89	6.35	7.96	12.13	8.29	7.82	12.29	10.5	6.35	12.29
ENSG00000022840|RNF10	101.19	124.74	194.84	101.1	203.77	218.48	205.99	134.5	197.62	150.13	151.27	245.13	144.84	193.52	189.23	231.94	171.89	241.44	155.11	153.9	268.36	145.5	162.59	213.57	192.58	156.68	197.54	136.3	176.93	187.59	147.98	153.12	250.63	176.15	195.91	191.46
ENSG00000022976|ZNF839	20.11	20.18	14.65	21.71	19.19	20.57	18.05	11.49	12.5	14.28	13.13	16.59	18.78	18.23	15.93	22.84	18.07	16.01	21.93	12.53	18.83	24.41	15.29	12.95	23.45	21.75	22.44	23.91	22.7	22.42	21.46	19.92	17.64	27.46	19.65	23.35
ENSG00000023041|ZDHHC6	53.36	42.8	40.56	55	39.61	45.13	43.46	43.4	31.71	52.55	36.67	48.73	67.15	45.64	54.51	61.54	41.29	67.56	60.57	48.08	44.99	52.29	60.05	59.26	57.67	58.47	46.78	61.32	49.79	64.89	54.79	52	44.57	64.08	63.42	87.3
ENSG00000023171|GRAMD1B	9.43	12.38	33.28	16.45	18.75	21.77	15.11	14.63	12.04	11.43	21.02	24.16	20.78	26.99	33.14	65.36	22.56	41.47	12.02	22.96	24.74	27.97	29.23	33.92	52.92	37.01	29.92	49.43	33.99	68.96	67.86	38.98	76.2	73.16	55.76	41.45
ENSG00000023191|RNH1	63.35	47.55	57.6	57.99	47.82	46.31	59.06	51.48	50.92	59.83	59.99	65.74	64.99	57.12	52.09	65.31	60.91	63.51	65.93	59.03	63.54	59.42	54.9	57.09	80.05	79.47	61.58	55.8	54.66	62.01	56.29	57.73	59.03	84.07	81.12	66.41
ENSG00000023228|NDUFS1	80.32	58.95	66.26	69.09	62.68	60.23	66.8	83.03	55.18	67.05	58.19	66.58	65.62	50.49	50.7	67.48	49.25	48.75	59.84	58.9	55.29	62.4	59.52	52.09	81.78	70.96	49.77	67.84	79.46	61.53	72.61	65.34	51.44	69.65	73.05	60.84
ENSG00000023287|RB1CC1	67.41	56.19	87.39	51.45	100.67	93.53	86.23	80.79	82.97	57.08	88.53	80.36	55.93	70.25	94.3	90.91	40.67	103.31	59.28	77.26	73.17	71	73.93	93.75	84.92	78.48	88.94	75.5	81.68	87.44	82.1	70.18	101.88	96.88	79.11	92.2
ENSG00000023318|ERP44	18.7	17.84	24.83	20.09	27.52	24.68	20.15	24.38	18.74	19.95	24.94	22.36	21.75	21.4	24.76	25.89	17.73	31.21	18.94	21.27	22.69	18.64	20.17	26.86	30.36	28.76	31.28	21.63	23.43	29.34	20.54	19.8	26.49	32.96	31.87	29.02
ENSG00000023330|ALAS1	33.32	35.96	43.56	35.08	47.57	46.59	43	43.38	41.78	39.81	39.8	40.9	46.78	43.66	41.65	41.22	32.72	52.67	35.33	40.32	41.93	39.27	32.69	50.72	45.37	34.05	44.68	36.8	35.98	44.22	35.71	29.83	41.98	36.65	37.51	51.43
ENSG00000023445|BIRC3	0.43	0.27	0.05	0.23	1.16	0.07	2.04	0.13	0.12	0.94	0.05	0	0.95	0.06	0	0.67	0.07	0	0	0	0	0.36	0.25	0.78	0.2	0.06	0.05	0.18	0.26	0	2.61	0.19	0	0.65	1.07	0.09
ENSG00000023516|AKAP11	31.99	24.13	67.77	29.95	56.59	52.2	45.87	39.26	41.17	25.82	38.33	45.11	29.49	41.01	45	47.74	19.99	73.38	28.4	42.24	47.92	32.42	45.82	68.83	41.06	38.93	64.57	39.22	42.65	72.19	39.54	39.82	78.5	40.54	36.92	68.74
ENSG00000023572|GLRX2	16.78	7.96	7.96	8.87	7.72	8.31	7.41	7.29	8.03	12.62	11.81	9.28	10.82	10.07	9.92	12.37	13.55	9.58	10.41	10.56	8.94	11.16	11.3	13.93	14.91	12.78	11.47	17.19	16.31	12.87	14.24	13.82	10.52	12.56	14.41	11.71
ENSG00000023608|SNAPC1	15.73	19.5	6.79	16.15	6.25	7.28	7.6	6.92	9.79	14.37	9.93	7.74	11.56	8.05	6.68	12.93	11.45	8.36	14.41	10.92	8.07	11.15	14.25	9.93	12.12	12.79	8.36	15.6	13.39	12.46	14.54	10.78	10.69	11.58	13.75	9
ENSG00000023697|DERA	28.98	30.34	20.36	30.98	3.92	12.73	5.71	11.76	22.97	28.5	25.96	37.65	28.34	32.44	28.7	22.69	21.06	3.27	25.35	26.02	28.18	30.43	30.13	8.47	22.86	22.29	5.32	44.54	36.78	13.88	51.05	44.01	9.61	13.5	21.07	5.42
ENSG00000023734|STRAP	287.9	225.46	322.46	221.13	276.84	302.3	266.1	287.07	283.31	245.82	285.92	277.3	254.09	279.09	272.12	209.66	262.57	260.22	231.65	292.59	343.88	207.74	205.21	261.85	216.34	203.45	276.67	235.88	248.78	280.68	209.09	217.19	238.73	207.78	208.01	268.08
ENSG00000023839|ABCC2	1.78	2.27	0.66	1.11	0.73	1.38	0.46	1.17	2.59	2.29	0.85	0.35	0.82	0.59	0.51	1.14	0.65	1.38	0.6	0.64	0.24	0.46	1.34	2.37	1.17	0.95	0.47	0.6	0.75	0.54	1.35	1.64	0.49	2.42	0.54	0.98
ENSG00000023892|DEF6	2.44	0.19	0.39	0.11	0.63	2.9	0.58	0.27	4.06	0.21	0.12	0.56	2.06	0.12	0.22	0.67	0.34	0.45	0.34	0.25	0	0.23	0.61	0.4	0.51	0.7	0.22	0.48	0.47	0.22	0	0.12	0.14	0.25	0	0.43
ENSG00000023902|PLEKHO1	107.51	76.71	100.91	89.78	97.89	104.74	106.5	90.55	95	123.44	119.65	89.35	117.18	125.12	111.28	121.81	142.03	151.24	134.2	115.81	95.89	131.31	119.51	137.98	125.94	108.07	134.64	126.89	131.37	118.73	119.79	120.29	136.45	113.89	112.71	128.59
ENSG00000023909|GCLM	10.05	11.35	6.6	11.77	5.89	6.5	9	6.87	7.35	7.26	6.33	7.93	9.66	9.63	8.89	20.19	9.56	10.83	10.46	8.21	6.58	11.46	13.35	9.83	33.62	25.23	8.7	14.27	11.01	12.55	10.18	10.99	10.85	29	32.76	8.23
ENSG00000024048|UBR2	17.55	16.2	22.05	16.5	26.71	25.98	20.43	20.69	22.6	16.07	17.54	21.21	17.36	18.97	22.29	21.66	10.96	25.88	17.5	19.27	21.72	18.9	19.2	22.77	22.89	20.9	21.91	21.63	22.93	25.61	22.9	21.9	27.7	22.22	21.73	23.91
ENSG00000024422|EHD2	0.24	0.42	0.54	0.45	0.37	1.16	0.31	0.72	0.22	0.87	0	0.16	0.35	28.35	0.26	4.72	1.56	0	0.86	0.3	0	3.64	2.47	1.07	4.56	2.44	4.01	1.06	1.11	1.61	1.1	3.19	0.92	1.97	1.98	0.46
ENSG00000024526|DEPDC1	22	20.26	0.92	17.99	1.2	1.75	2.53	4.91	10.91	12.59	6.2	0.23	15.06	7.56	0.18	12.04	10.19	0.25	17.04	7.96	0.66	18.63	20.89	0.61	10.11	15.46	0.55	14.64	12.97	0.65	22.63	20.55	0.91	6.15	9.72	0.74
ENSG00000024862|CCDC28A	10.97	11.3	6.68	12.8	7.94	9.71	8.9	8.6	8.87	12.03	8.17	6.76	11.36	6.94	6.41	14.03	17.43	11.09	14.33	7.17	5.64	13.02	12.46	11.67	11.04	11.92	16.76	9.09	11.66	18.65	16.13	14.8	14.02	15.9	12.67	19.24
ENSG00000025039|RRAGD	23.47	27.99	18.39	27.05	22.14	20.17	12.95	14.59	14.99	19.82	17.89	23.11	22.94	24.07	26.71	23.2	19.84	31.54	20.45	27.15	32.45	26.29	27.86	24.84	32.64	42.26	31.87	11.64	19.75	22.16	15.09	21.38	16.26	19.83	25.5	26.59
ENSG00000025156|HSF2	64.22	58.52	72.43	59.05	86.73	74.91	75.66	76.84	67.4	52.02	71.74	54.87	58.81	58.61	65.23	76.54	61.49	71.14	56.37	53.51	63.04	53.06	55.81	85.25	74.36	69.59	68.54	58.45	81.33	81.14	52.04	52.39	69.67	80.58	83.61	76.96
ENSG00000025293|PHF20	48.76	46.22	70.89	40.6	54.4	49.46	54.73	55.54	58.85	47.42	52.94	62.26	55.24	56.95	70.53	49.74	47.27	69.92	47.97	62.88	67.75	52.27	61.71	70.67	46.66	41.34	58.04	51.45	59.5	75.01	56.25	68.57	74.35	52.86	41.2	83.23
ENSG00000025423|HSD17B6	2.24	2.88	1.42	1.43	0	0.22	0.38	0.66	0.4	1.05	0.82	0.91	4.7	0.99	0.53	0.31	0.69	15.15	3.98	0.61	0	1.51	3.71	1.32	1.84	1.79	2.92	3.11	2.42	1.79	2.3	0.82	0.67	0.97	6.73	1.36
ENSG00000025434|NR1H3	7.42	5.27	12.66	6.32	4.18	11.03	5.47	4.28	8.01	6.6	5.13	10.14	8.61	4.73	4.91	8.4	15.68	10.09	6.12	10.39	1.98	12.13	8.95	8.42	12.31	10.48	6.19	8.62	12.37	12.54	12.23	11.95	11.83	6.06	6.53	7.87
ENSG00000025708|TYMP	1.63	3.07	1.77	1	1.55	2.41	2.62	0.78	2.93	1.76	0.48	1.85	1	0.55	1.42	0.78	0.28	1.92	0.97	1.13	0.8	3.53	1.67	2.73	0.72	0.2	1.47	1.36	1.24	0.98	2.23	0.95	2.67	0.2	0.14	1.12
ENSG00000025770|NCAPH2	77.42	66.52	68.78	86.84	78.46	68.79	61.85	51.39	72.53	82.58	59.21	59.76	82.89	65.25	47.12	65.45	88.66	64.68	81.71	69.31	71.96	88.15	88.11	67.86	64.01	75.66	72.47	97.02	78.87	66.7	101.26	97.14	82.96	67.24	60.93	91.34
ENSG00000025772|TOMM34	26.16	16.26	16.01	22.31	9.95	12.61	10.99	16.06	13.86	14.48	18.17	15.67	20.07	16.11	17.44	16.41	20.61	21.08	18.34	15.92	14.8	16.66	18.21	21.53	15.76	17.19	18.32	18.97	17.3	24.52	16.06	14.48	17.13	12.92	15.03	20.83
ENSG00000025796|SEC63	86.43	86.37	87.27	81.55	92.46	106.27	92.77	92.51	99.52	75.23	98.6	86.15	88.61	116.6	105.7	177.64	131.63	172.95	88.27	100.96	94.55	103.42	114.87	126.22	193.24	196.49	153.6	102.85	102.99	118.67	130.73	97.11	147.88	179.74	161.5	164.63
ENSG00000025800|KPNA6	27.76	27.44	32.46	28.31	33.9	33.85	28.51	25.38	30.23	29.09	32.7	31.51	29.75	27.54	31.53	31.15	20.76	34.68	31.08	27.78	30.5	28.18	29.66	31.9	32.15	29.33	31.76	30.63	31.61	33.69	29.95	30.26	27.04	28.32	26.32	31.92
ENSG00000026025|VIM	1876.67	2443.13	122.92	2068.72	147.45	167.03	325.83	464.94	1053.98	1987.46	694.6	110.42	1951.15	912.81	99.18	1554.5	1822.27	192.71	1983	882.9	133.09	1952.72	1746.08	216.22	1216.66	1986.98	255.42	785.38	727.43	79.54	525.5	681.27	43.84	969.67	1421.84	102.95
ENSG00000026036|RTEL1-TNFRSF6B	7.64	5.78	5.88	5.99	7.1	8.19	5.33	3.1	4.34	6.46	4.48	8.03	6.1	6.54	8.39	6.73	4.31	5.83	7.04	6.19	7.44	6.87	8.66	6.15	8.02	8.34	7.15	8.02	7.44	6.01	9.33	11.16	10.09	8.58	9.72	9.2
ENSG00000026103|FAS	0.28	2.26	1.15	0.86	0.92	0.82	0.45	0.89	0.78	1.38	2.67	1.42	2.63	2.37	0.92	2.73	1.07	0.7	5.1	4.07	1.39	2.2	2.3	0.52	6.8	9.8	0.33	3.6	4	1.13	2.5	3.56	0.37	2.29	3.76	0.42
ENSG00000026297|RNASET2	24.44	28.53	38.5	32	29.38	43.55	31.76	19.57	47.77	12.07	18.26	27.56	11.65	13.02	22.45	13.69	12.94	12.64	13.83	19.09	19.82	10.78	8.81	14.28	7.04	11.08	14.23	6.59	10.98	10.78	5.17	8.75	14.04	7.02	7.36	10.39
ENSG00000026508|CD44	0.72	2.37	0.06	4.89	0.07	2.1	0.54	1.05	0.66	3.01	0.86	0	0.88	1.14	0.53	6.09	0.98	0	4.28	1.3	0.9	4.39	3.56	0.12	3.58	8.71	0	22.16	6.01	1.47	1.87	0.93	0.18	6.43	10.22	0
ENSG00000026559|KCNG1	7.76	10.8	42.54	28.35	13	37.81	36.15	26.97	13.69	33.72	31.28	133.97	34.9	35.66	137.91	70.31	47.51	44.55	27.27	29.36	75.08	49.94	38.21	25.99	79.76	83.45	43.51	29.77	17.15	9.16	40.53	15.44	9.72	74.76	69.77	24.37
ENSG00000026652|AGPAT4	55.84	47.43	54.32	51.11	53.47	50.08	49.91	49.48	59.44	46.95	52.96	55.49	51.58	49.53	55.5	71.71	39.48	51.25	51	56.29	56.51	52.85	53.98	57.27	77.73	70.05	46.46	30.89	39.25	49.09	45.94	46.17	62.32	55.81	53.82	49.59
ENSG00000026751|SLAMF7	0	0	0.13	0	0.15	0	0	0	0.11	0	0	0	0	0.12	0.1	0	0	0.14	0	0	0.11	0	0.1	0	0	0	0	0	0	0	0.1	0.15	0.13	0.24	0	0.1
ENSG00000026950|BTN3A1	14.58	18.09	18.44	18.51	17.6	22.97	16.24	11.03	28.2	16.53	15.16	22.14	9.82	18.54	21.5	20.94	9.82	24.47	13.34	10.9	15.03	20.58	29.08	42.28	23.49	22.03	25.56	21.65	25.7	42.43	38	22.73	51.38	20.41	23.06	35.72
ENSG00000027001|MIPEP	9.38	10.08	9.57	12.14	6.37	9.96	6.73	10.24	5.2	9.03	5.34	8.51	7.76	11.12	8.74	4.73	6.99	7.36	9.31	10.1	10.25	6.59	7.37	9.17	3.95	5.49	4.53	9.29	6.48	6.19	7.76	6.54	5.29	3.73	6.68	7.08
ENSG00000027075|PRKCH	1.07	0.21	2.51	0.37	1.7	4.8	0.76	1.96	3.11	1	7.23	2.4	0.79	2.86	0.77	1.05	0	3.43	0.09	8.61	3.12	0	0.5	1.01	0.38	0.17	1.93	2.24	0.28	5.11	0.08	0	1.14	0.2	0	0.97
ENSG00000027644|INSRR	0.04	0.08	0.05	0.04	0.19	0.49	0.05	0.05	0.05	0	0	0.06	0.05	0	0	0	0	0	0	0	0	0	0	0.16	0	0	0.04	0.14	0.05	0.04	0.04	0	0.06	0	0.15	0.04
ENSG00000027697|IFNGR1	35.17	32.1	24.75	35.11	35.69	33.32	31.2	35.39	25.93	34.27	29.68	27.33	33.07	28.99	28.64	49.57	46.06	41.83	34.51	26.31	26.98	42.18	37.93	43.22	50.08	44.34	35.89	47.98	52.06	50.36	38.38	46.66	35.51	44.02	45.19	37.99
ENSG00000027847|B4GALT7	17.82	15.39	22.87	15.32	14.91	21.93	19.78	14.69	16.39	22.27	18.51	26.36	20.57	22.66	24.72	22.52	23.19	20.56	19.05	17.95	20.03	21.2	19.47	22.44	20.71	22.52	24.48	18.23	19.91	32.68	16.95	19.46	19.13	25.28	22.04	26.66
ENSG00000027869|SH2D2A	0.6	3.84	0	0.55	0	0.2	0	0.72	0	0.16	0	0	0	0	0	1.78	0	1.54	0	0	0	0	0.34	0.72	0	0	0	0.62	0	0	0	0	2.08	0	0	0.66
ENSG00000028116|VRK2	5.55	8.06	1.96	3.59	0.44	0.57	0.6	1.78	0.71	3.31	5.59	3.89	2.11	2.86	3.28	2.34	2.28	2.7	2.35	1.92	2.94	2.41	2.83	1.01	0.76	1.33	2.3	2.24	1.41	1.78	1.4	0.7	2.38	0.52	0.35	0.69
ENSG00000028137|TNFRSF1B	0.19	0.68	0.08	0.06	0	0.08	0	0.08	0.07	0.19	0.07	0	0	0	0	0.2	0	0	0	0.15	0.07	0.14	0.18	0.08	0.08	0	0.15	0.07	0.07	0.19	0	0.07	0	0	0	0
ENSG00000028203|VEZT	143.41	158.95	225.63	157.33	181.68	196.8	223.74	265.63	215.86	128.1	197.08	170.89	161.38	173.21	180.05	165.07	92.21	252.64	150.89	195.89	179.47	149.1	146.22	172.87	171.78	140.1	205.9	129.08	145.27	176.37	151.08	142.04	178.83	173.8	153.21	189.97
ENSG00000028277|POU2F2	13.18	15.23	78.11	5.91	256.81	94.42	72.48	33.7	60.3	6.59	34.17	52.06	10.75	33.87	50.04	8.12	6.97	25.58	13.54	42.09	54.32	7.51	11.88	32.89	9.33	7.4	29.23	73.08	11.6	16.68	22.85	18.98	16.86	5.81	4.16	14.83
ENSG00000028310|BRD9	58.6	54.79	73.76	54.16	67.77	73.6	78.54	70.31	68.4	58.52	65.25	75.85	69.14	62.45	74.47	72.44	67.74	86.13	60.59	62.23	68.76	56.35	55.83	67.26	81.93	66.88	80.92	79.07	71.71	93.76	70.84	72.65	70.96	96.74	80.48	86.38
ENSG00000028528|SNX1	68.78	55.18	50.36	85.15	58.5	48.84	56.38	56.86	52.01	76.67	53.7	53.99	65.64	47.36	45.62	77.72	57.36	60.74	76.97	55.46	51.71	67.28	77.52	52.79	77.14	65.58	58.86	84.55	81.32	60.04	86.93	81.23	62.59	84.01	68.21	66.11
ENSG00000028839|TBPL1	69.54	53.14	79.13	55.65	78.15	79.23	85.46	85.83	87.69	58.84	83.4	58.07	60.23	88.9	56.68	77.95	85.57	105.14	65.98	93.96	74.34	56.1	53.62	107.8	70.11	49.14	94.11	74.15	72.29	102.75	58.7	70.84	111.65	79.79	52.93	117.25
ENSG00000029153|ARNTL2	3.94	3.19	7.21	3.42	6.86	5.51	4.22	4.6	6.19	1.01	3.7	2.12	1.06	2.5	1.94	0.52	0.58	8.82	2.21	3.48	2.4	0.93	2.06	3.79	0.55	0.49	5.4	3.8	3.88	3.92	2.78	2.83	4.51	0.35	0.29	5.28
ENSG00000029363|BCLAF1	252.96	165.5	243.41	202.01	264.33	238.85	213.18	284.66	190.88	232.78	215.68	198.74	183.75	221.12	186.9	321.19	201.85	232.23	225.01	230.4	224.98	253.7	232.01	204.6	272.48	218.85	201.27	256.9	251.12	240.95	240.32	252.72	212.51	238.1	208.5	216.88
ENSG00000029364|SLC39A9	38.81	41.06	49.98	41.11	50.62	44.58	47.91	52.57	40.97	39.82	44.72	35.08	44.9	41.59	39.27	56.71	18.73	42.36	40.11	44.93	42.66	42.03	48.79	52.39	51.04	48.88	47.24	58.14	49	54.66	39.94	41.8	43.91	55.19	44.74	47.46
ENSG00000029534|ANK1	0.54	0.24	5.86	0.92	7.64	6.73	3.38	1.01	4.45	0.39	1.88	2	0.76	5.1	4.6	0.56	0.29	10.55	0.25	1.57	2.26	0.39	1.41	9.35	0.29	0.7	9.78	1.44	0.72	7.63	0.68	1.53	5.99	1.68	0.38	8.03
ENSG00000029559|IBSP	0	0	0	0	0	0	0	0	0	0	0	0	0	0	0	0	0	0	0	0	0	0	0	0.21	0	0.19	0	0	0	0	0	0	0.22	0	0	0
ENSG00000029639|TFB1M	11.64	10.39	12.8	9.92	8.1	11.37	5.01	7.52	9.13	8.9	10.27	4.87	13.89	4.93	4.76	16.64	11.2	8.72	10.92	10.23	3.05	9.81	10.03	13.96	20.22	11.29	14.49	11.76	8.3	16.74	12.54	9.58	13.1	11.34	6.78	22.4
ENSG00000029725|RABEP1	64.26	63.4	152.97	65.72	131.57	134.12	116.15	141.8	94.85	69.04	118.23	127.61	69.7	112.44	138.31	94.25	63.35	159.16	72.09	115.47	141.6	68.75	88.75	128.09	97.43	84.4	134.98	79.78	88.07	125.65	80.33	88.53	130.8	101.03	88.22	120.09
ENSG00000029993|HMGB3	551.69	456.75	296.72	496.47	320.39	273.33	300.78	335.17	347.83	466.48	285.71	200.29	462.52	280.29	158.99	266.28	250.54	167.81	475.5	307.8	169.94	395.14	347.85	182.93	244.52	233.57	167.64	442.33	359.3	207.71	439.97	391.01	211.39	205.19	207.33	190.6
ENSG00000030066|NUP160	68.73	74.28	63.72	68.35	76.37	64.02	70.9	62.36	56.11	65.56	65.12	49.39	63.96	55.88	49.59	70.91	29.39	75.88	70.54	61.35	48.39	60.19	73.64	61.67	62.14	64.12	78.57	71.01	73.44	76.24	69.76	74.34	81.62	71.27	49.58	81.36
ENSG00000030110|BAK1	14.19	10.01	13.25	13.2	12.39	10.92	16.31	11.16	11.78	15.54	10.92	11.57	14.5	11.15	14.27	12.99	12.26	16.36	14.18	11.03	11.45	11.97	12.5	13.14	15.39	14.74	14.8	14.66	14.22	15.08	14.95	16.55	12.96	11.58	12.33	14.1
ENSG00000030304|MUSK	0	0	0	0	0	0	0	0	0	0	0	0	0	0	0	0	0	0	0	0	0	0	0	0	0	0	0	0	0	0	0	0	0	0	0.26	0
ENSG00000030419|IKZF2	2.47	4.16	4.65	3.6	5	4.43	3.19	2.84	3.7	2.31	3.06	1.71	3.48	2.13	1.95	7.51	3.15	2.56	2.83	5.17	3.38	6.81	7.48	2.28	4.22	4.52	1.99	5.69	5.72	2.78	7.24	6.38	3.45	2.72	4	1.69
ENSG00000030582|GRN	36.92	31.33	21.26	51.47	22	32.53	43.73	44.22	31.15	38.95	51.96	47.95	37.03	39.99	32.29	46.86	41.38	29.65	32.71	40.33	33.1	37.13	42.53	46.48	41.4	47.16	41.67	36.63	37.08	40.69	31.49	39.04	30.01	49.88	59.12	32.08
ENSG00000031003|FAM13B	44.85	34.35	70.17	38.1	70.71	78.76	62.44	64.08	49.64	41.06	52.78	66.83	38.59	53.39	65.41	63.04	17.83	85.79	43.26	49.82	66.8	45.11	54.15	60.35	65.37	52.73	81.24	50.94	63.27	71.71	56.17	52.04	91.65	68.91	51.66	90.22
ENSG00000031081|ARHGAP31	0.95	1.85	0.08	1.45	0.07	0.2	0.22	0.66	0.57	2.01	0.81	0.21	2.24	1.22	0.74	10.61	3.27	1	1.27	0.62	0.29	5.53	5.46	1.25	11.37	13.25	1.46	4.91	7.21	0.81	5.79	6.15	1.06	11.62	18.17	1.05
ENSG00000031691|CENPQ	29.7	26.65	1.98	28.33	2.15	1.85	5.11	8.91	13.96	21.4	7.97	1.91	24.01	13.71	1.79	16.3	25.66	2.32	21.46	14.65	1.99	29.65	21.77	3.49	12.41	13.19	3.02	28.05	24.59	4.51	21.87	24.99	1.7	7.3	15.22	3.45
ENSG00000031698|SARS	193.61	214.3	228.87	190.45	256.47	261.94	276.75	302.62	252.17	188.8	235.67	223.37	208.04	221.3	206.52	676.25	658.78	538.91	191.23	213.59	212.11	225.99	225.22	262.73	828.93	675.58	541.22	201.22	219.58	318.62	223.26	181	312.34	894.63	750.12	755.35
ENSG00000031823|RANBP3	87.93	82.57	94.79	94.16	100.68	81.23	102.18	112.16	82.89	91.04	80.48	80.76	92.49	87.35	81.05	89.8	49.74	94.56	78.83	97.26	94.1	76.1	86.15	94.34	93.08	82.7	101.52	88.67	77.74	99.79	101.4	95.49	110.06	78.41	108.54	97.58
ENSG00000032219|ARID4A	47.84	52.79	78.33	35.49	80.69	74.96	68.4	74.85	68.95	35.98	59.91	89.56	47.51	54.24	88.46	56.34	56.55	80.97	39.84	49.25	88.91	52.71	54.43	68.93	56.77	44.37	69.58	57.9	87.54	66.97	66.03	60.79	71.43	42.29	39.69	59.04
ENSG00000032389|EIPR1	28.22	27.08	42.87	27.54	40.17	45.1	39.4	47.37	42.73	32.59	40.32	45.4	25.99	35.78	43.79	25.44	29.65	42.05	30.13	31.4	44.56	21.51	26.59	37.49	33.26	25.63	42.73	25.67	27.6	44.24	24.19	28.61	32.16	31.43	25.62	42.89
ENSG00000032444|PNPLA6	13.93	19.88	25.66	32.73	37.72	22.68	23.77	17.98	27.32	29.42	27.68	33.66	15.98	31.12	37.7	30.87	19.56	29.38	25.15	21.38	33.07	20.76	30.91	40.62	20.55	28.79	33.32	13.01	18.19	31.34	23	17.75	44.45	23.31	24.33	24.48
ENSG00000032742|IFT88	23.65	23.32	19.3	32.22	22.66	23.27	15.18	17.58	20.29	18.31	16.95	17.67	21.31	19.51	24.89	28.3	26.5	12.36	21.27	19.03	23.62	23.11	22.95	14.46	24.33	20.34	13.65	33.41	30.56	16.7	30.36	23.7	19.91	30.28	20.19	20.99
ENSG00000033011|ALG1	12.78	14.97	15.7	20.01	21.21	17.06	19.76	13.54	13.42	17.34	14.11	14.31	15.13	17.94	18.33	18.8	14.92	15.21	17.16	14.57	18.16	22.85	13.45	12.56	19.19	22.4	18.02	26.43	16.64	18.99	14.12	12.42	16.67	21.7	20.17	20.58
ENSG00000033030|ZCCHC8	55.83	46.41	41.33	44.84	49.97	55.93	40.7	41.22	46.31	51.92	41.12	40.77	47.17	43.02	37.41	67.44	30.03	65.35	50.41	37.72	43.57	62.38	59.89	60.66	73.23	76.56	61.89	60.74	66.66	66.78	56.91	53.56	57.3	61.59	59.64	54.84
ENSG00000033050|ABCF2	44.36	28.75	33.23	38.87	33.18	58.91	36.68	33.2	28.04	31.98	42.98	42.75	57.08	37.85	57.66	42.92	34.27	46.74	43.13	47.9	38.94	30.79	26.01	45.53	48.12	35.02	43.13	37.24	36.79	44.45	29.46	45.44	53.14	85.51	31.2	42.85
ENSG00000033100|CHPF2	14.1	12.73	21.23	17.18	16.8	17.79	15.57	13.33	13.23	16.5	14.58	17.22	17.02	21.88	13.77	20.14	14.99	17.24	16.98	15.24	15.95	14.41	15.15	15.18	27.9	25.19	15.25	18.91	19.87	18.65	17.28	18	15.6	30.62	31.88	17.26
ENSG00000033122|LRRC7	14.23	4.68	143.71	10.01	126.81	118.37	103.09	82.61	70.47	18.04	176.28	206.38	42.61	199.65	244.89	61.62	33.39	444.78	19.07	151.66	188.52	33.23	88.28	425.87	72.27	48.58	399.34	15.44	40.15	374.64	43.88	30.28	514.61	80.14	37.55	423.46
ENSG00000033170|FUT8	46.62	42.66	50.78	34.6	56.62	46.43	50.23	41.08	55.36	68.63	47.91	29.26	71.31	43.46	24.1	65.09	53.38	33.19	54.06	42.41	31.69	105.02	85.5	40.07	55.88	74.96	30.35	53.6	55.16	49.61	49.59	73.9	49.23	42.53	57.4	42.84
ENSG00000033178|UBA6	71.11	35.52	51.22	33.49	52.75	72.43	74.11	55.94	54.31	44.43	46.08	45.96	69.54	32.13	47.59	79.53	21.64	72.95	29.67	56.27	60.78	45.98	64.87	68.5	45.51	45.94	56.89	64.48	44.69	77.35	51.35	53.55	54.19	47.81	37.43	43.29
ENSG00000033327|GAB2	9.99	13.39	27.3	8.16	26.18	30.01	32.05	18.47	21.04	11.23	21.74	25.06	10.99	19.48	23.71	31.3	11.98	40.19	11.82	16.29	21.15	17.16	21.75	34.35	45.15	40.47	38.3	16.98	22.56	38.93	18.06	16.97	43.85	46.88	46.36	47.96
ENSG00000033627|ATP6V0A1	50.78	48.16	181.71	52.9	189.56	165.22	144.65	156.97	134.1	62.58	127.89	171.32	64.78	129.17	159.23	101.1	76.74	208.66	68.97	128.21	151.78	66.54	89.93	156.72	111.88	92.13	175.61	66.92	79.05	149.81	92.8	88.67	158.29	116.48	115.13	176.41
ENSG00000033800|PIAS1	27.68	30.45	26.68	36.94	45.87	31.27	35.55	37.98	27.5	21.29	23.05	20.43	26.05	24.7	15.95	33.06	18.5	26.47	30.03	23.68	22.35	27.98	31.89	29.47	32.83	22.69	22.56	30.42	29.9	29.06	31.75	39.13	39.09	32.62	22.75	26.91
ENSG00000033867|SLC4A7	62.98	62.95	66.53	51.82	69.55	76.18	67.75	63.47	54.3	59.81	56.17	29.52	63.13	45.5	30.1	65.99	18.3	56.95	60.36	53.62	32.03	57.92	64.89	50.99	59.17	45.55	50.51	58.23	56.93	65.51	56.99	54.82	78.93	69.53	57.73	50.93
ENSG00000034053|APBA2	51.08	52.75	131.95	56.83	134.7	147.94	132.37	101.48	98.98	59.1	106.96	122.04	70.65	100.84	124.86	80.86	51.95	116.22	54.79	100.57	116.88	74.92	81.68	113.02	76.86	53.75	101.56	77.43	78.75	121.23	90.7	77.52	160.75	82.46	63.35	120.8
ENSG00000034152|MAP2K3	14.58	13.78	13.53	10.86	18.79	16.66	16.51	8.69	22.59	7.77	10.45	15.45	11.43	12.04	10.73	15.47	7.17	12.01	10.61	14.17	12.7	9.98	16.57	20.56	10.17	9.6	8.12	11.37	13.3	18.35	15.93	11.94	18.52	10.08	10	8.9
ENSG00000034239|EFCAB1	2.64	1.46	2.53	7.58	2.64	2.25	5.18	7.2	1.18	1.01	1.46	0	1.88	2.73	0.12	0.77	1.68	1.29	1.12	0	0.69	2.36	0.83	0.58	0.73	2.72	0.75	0.52	0	1.31	0.88	0.73	2.88	0.8	2.41	0.71
ENSG00000034510|TMSB10	2370.59	1842.02	6475.44	1862.41	4784.11	6250.72	4432.95	5866.24	4113.98	2903.86	6131.23	7407.4	3027.36	6190.42	6878.23	2254.3	4522.85	4168.1	2916.42	5811.75	7235.83	3449.39	3787.89	5894.38	2427.48	1847.55	4235.73	3627.3	3325.87	5228.25	4158.62	3428.97	4671.85	2777.59	2288.13	3548.17
ENSG00000034533|ASTE1	4.57	2.59	5.93	8.81	6.33	4.12	3.93	4.63	1.61	2.97	4.83	5.26	2.81	3.71	4.42	3.59	2.83	4.36	4.63	4.76	5.02	2.01	3.17	4.08	4.94	2.64	7.6	5.21	4.87	19.6	3.04	3.01	10.56	3.87	2.01	4.16
ENSG00000034677|RNF19A	27.24	28.39	41.97	27.01	67.2	45.71	48.31	48.34	25.23	28.44	37.3	16.76	31.73	26.9	22.16	52.9	25.52	46.48	38.72	34.68	41.01	49.45	50.94	57.71	69.08	53.15	59.41	63.32	65.74	71.03	48.83	69.63	76.35	60.96	56.44	110.88
ENSG00000034693|PEX3	18.9	23.63	30.29	22.63	37.27	23.83	28.02	20.9	16.13	19.75	21.88	20.88	23.67	26.86	28.75	16.84	43.15	19.83	24.03	19.45	32.74	24.38	30.17	33.12	33.66	20.94	22.35	25.62	24.26	27.49	17.78	15.87	20.58	24.87	16.95	19.22
ENSG00000034713|GABARAPL2	144.28	112.89	285.04	112.4	344.23	271.94	280.94	230.81	201.55	173.15	211.18	239.41	200.82	227.99	268.53	130.32	182.29	203.05	159.6	208	310.49	155.81	162.18	232.74	121.33	146.5	221.43	149.81	184.37	226.65	162.13	179.22	186.56	131.65	137.5	199.58
ENSG00000034971|MYOC	0.17	0.15	0	0	0	0	0	0	0.19	0	0	0	0	0	0	0	0	0	0	0	0	0	0	0	0	0	0.17	0	0	0	0	0	0	0	0	0
ENSG00000035115|SH3YL1	62.18	54.7	68.33	56.11	95.02	67.08	73.01	61.8	67.71	50.54	48.39	61.52	55.18	56.09	63.19	75.04	48.01	112.17	68.61	55.01	70	61.12	71.77	91.05	77.18	80.91	125.99	49.51	64.47	86.87	74.89	76.18	115.52	64	63.1	108.31
ENSG00000035141|FAM136A	60.32	48.71	32.97	60.89	38.24	32.33	29.07	32.33	40.04	64.67	34.61	25.93	60.73	40.77	28.87	41.47	45.47	43.69	62.58	41.19	29.43	48.84	51.26	43.67	39.9	45.49	47	63.74	53.98	53.54	53.44	53.97	56.95	39.7	38.47	47.5
ENSG00000035403|VCL	33.38	23.81	19.25	34.77	14.62	16.07	19.62	22.57	20.56	42.76	25.49	13.11	42.43	23.85	8.12	43.45	15.05	21.64	38.81	29.05	13.74	45.03	34.81	20.34	30.99	33.74	18.36	27.5	18.8	20.69	17.47	14.52	24.02	26.97	24.63	16.04
ENSG00000035499|DEPDC1B	46.21	50.82	4.3	49.69	2.23	4.44	6.6	15.49	22.89	30.39	13.69	5.02	29.01	15.68	1.52	16.56	21.98	3.99	34.03	21.47	3.78	34.25	30.71	2.84	14.84	17.77	2.73	31.15	21.34	4.02	42.61	32.93	4.64	12.19	16.45	4.55
ENSG00000035664|DAPK2	4.29	3.9	1.34	3.95	1.19	0.66	0.32	0.46	1.99	8.17	1.47	1.42	7.19	3.28	2.52	11.57	10.23	5.7	2.62	1.59	5.01	9.61	13.93	6.91	7.28	14.19	6.73	7.55	5.45	4.76	12.71	12.14	10.45	7	12.78	11.86
ENSG00000035681|NSMAF	33.86	28.59	21.57	20.38	26.1	39.97	13.12	17.28	22.57	21.08	21.04	34.71	25.13	20.78	25.75	35.47	17.42	33.88	26.73	21.68	22.32	24.73	34.54	27.5	30.32	36.65	27.79	29.88	40.16	32.88	34.94	33.64	31.38	35.36	34.49	26.66
ENSG00000035687|ADSS	44.6	44.51	66.51	42.79	67.58	71.77	76.56	56.77	54.86	48.28	69.44	77.9	52.06	67.02	76	48.99	35.83	83.67	50.92	64.99	71.49	49.3	60.82	73.22	58.64	51.81	76.8	45.36	55.88	73.58	47.55	51.69	81.91	49.8	41.37	77.11
ENSG00000035720|STAP1	0	0	0	0.18	0.26	0	0.38	0	0	0	0	0.23	0	0.2	0	0	0.14	0	0	0.41	0	0	0	0	0	0.19	0	0	0.19	0	0	0.39	0.67	0.21	0	0
ENSG00000035862|TIMP2	66.6	57.84	170.09	81.97	134.14	176.83	122.01	79.55	105.75	88.87	173.86	315.89	103.82	181.08	324.97	96.24	92	185	84.37	143.98	270.26	154.79	178.42	184.12	98.15	148.28	187.47	131.7	179.9	154.47	132.68	162.04	163.73	85.75	132.85	149.05
ENSG00000035928|RFC1	67.43	60.93	32.38	80.55	49.72	41.62	31.83	43.19	40.12	58.62	33.45	28.8	55.49	36.24	30.59	57.99	35.55	29.49	68.14	44.43	32.21	54.42	53	34.39	53.11	55.54	33.34	56.53	52.48	35.84	61.62	46.79	38.84	51.18	53.93	47.18
ENSG00000036054|TBC1D23	39.52	25.02	36.67	31.87	42.94	40.57	36.98	31.35	41.2	35.29	40.03	36.17	35.76	39.25	34.74	51.54	37.72	44.44	28.52	35.92	36.26	43.19	41.86	43.53	60.11	45.56	46.95	43.99	51	53.03	40.97	41.77	43.94	52.47	47.49	49.33
ENSG00000036257|CUL3	108.73	108.51	150.35	118.66	122.98	135.36	135.59	94.06	129.3	122.91	150.7	145.64	121.13	121.49	143.97	156.15	138.65	123.11	122.37	136.12	168.83	128	116.16	118.22	161.81	180.36	113.54	119.81	133.04	107.97	112.29	130.22	109.43	138.01	161.9	103.33
ENSG00000036448|MYOM2	4.53	9.79	14.7	11.15	20.42	16.89	10.88	13.84	13.86	4.08	7.11	14.14	5.93	12.37	14.95	12.41	6.64	18.39	11.19	9.01	8.66	9	8.67	6.41	16.52	13.19	16.36	8.41	4.93	13.05	6.22	11.88	11.95	5.32	11.77	64.94
ENSG00000036473|OTC	0	0	0	0	0	0	0	0	0	0	0	0	0	0	0	0	0	0	0	0	0	0.18	0	0	0	0	0	0	0	0	0.3	0	0	0	0	0
ENSG00000036530|CYP46A1	6.38	3.34	19.38	3.34	22.9	17.65	13.62	8.97	9.13	2.17	6.29	9.81	2.09	8.3	10.64	2.56	1.25	7.71	2.49	6.27	10.42	2.91	2.88	9.89	4.48	4.49	10.22	4.61	2.82	6.02	1.88	2.91	7.57	3.61	2.42	6.06
ENSG00000036549|AC118549.1	46.34	49.68	53.86	53.93	44.92	44.94	42.89	62.47	45.05	48.71	44.74	41.07	39.16	38.51	36.19	67.35	27.88	57.61	55.4	50.08	46.02	42.54	58.22	58.93	55.59	61.4	43.19	57.63	61.44	72.74	38.57	42.12	50.03	57.31	54.08	55.5
ENSG00000036565|SLC18A1	0.65	0.44	0.75	0	0.92	0.68	1.76	1.22	1.99	0	0	0	0	0	0	0	0	0	0	0.78	0	0.09	0.24	0	0	0	0	0	0	0	0	0	0	0	0	0
ENSG00000036672|USP2	6.76	9.04	2.09	11.77	1.7	2.43	4.39	4.28	1.91	7.05	4.45	5.19	5.39	6.41	5.31	5.2	4.03	10	5.76	6.47	5.18	4.99	4.56	8.45	5.37	3.82	7.73	3.94	4.61	8.5	2.32	2.44	3.96	2.46	4.91	5.94
ENSG00000036828|CASR	1.64	2.24	2.64	1.26	3.72	3.03	3.07	2.1	2.67	2.78	2.44	2.48	1.85	1.55	3.53	2.71	1.87	3.5	2.1	2.48	2.28	2.89	2.68	3.73	2.43	2.98	3.81	2.6	3.18	3.98	2.86	3.01	4.42	2.38	1.82	4.01
ENSG00000037042|TUBG2	29.08	25.66	56.93	23.48	60.09	51.67	53.23	37.76	35.29	26.2	29.77	59.68	24.76	36.5	57.74	42.27	27.51	61.73	28.46	30.39	61.87	39.85	36.07	44.87	36.65	40.23	67.55	31.41	32.59	42.95	34.09	39.76	44.81	28.65	31.18	55.43
ENSG00000037241|RPL26L1	112.18	96.41	111.81	107.04	128.01	129.03	88.96	92.77	78.97	87.51	111.76	116.33	95.19	98.94	112.41	88.82	120.69	129.36	77.06	78.85	108.08	115.27	81.21	235.27	80.24	65.63	103.71	88.04	105.39	144.16	91.68	123.84	97.53	55.16	70.94	87.72
ENSG00000037280|FLT4	3.37	4.26	1.55	5.26	0.61	0.5	0.26	0.43	1.08	2.67	1.81	0.07	3.31	2.41	0.11	1.17	0.5	1.01	4.18	2.75	0.88	5.55	4.32	0.51	0.98	1.64	0.21	5.67	2.48	0.61	4.02	1.06	0.44	0.58	0.21	1.32
ENSG00000037474|NSUN2	78.21	80.46	68.85	62.94	79.93	77.93	71.88	56.7	59.52	72.47	61.86	73.9	59.86	67.73	71.48	102.33	65.02	104.26	77.01	83.81	66.73	91.99	80.43	94.36	109.85	96.24	98.05	94.5	86.39	115.62	86.73	82.57	104.94	95.13	99.16	114.65
ENSG00000037637|FBXO42	24.36	28.84	26.68	29.01	43.62	33.13	30.2	31.66	22.59	22.37	28.32	32.17	23.17	27.04	35.31	27.58	28.86	38.8	28.72	23.91	27.31	26.59	24.2	35	42.89	37.83	34.23	25.75	30.31	36.08	31.11	32.04	38.33	31.84	36.32	32.88
ENSG00000037749|MFAP3	45.93	26.33	60.14	43.93	64.39	52.21	53.5	54.83	45.49	37.14	36.59	35.84	30.72	32.76	33.99	50.61	6.91	76.26	39.58	36.51	41.87	32.21	44.1	52.21	39.16	38.29	51.85	45.22	43.3	94.19	39.73	47.47	79.95	42.69	44.44	75.57
ENSG00000037757|MRI1	11.24	10.45	19.17	16.66	23.78	18.08	14.95	13.22	11.93	12.64	16.82	15.19	16	12.14	22.05	13.75	4.08	17.96	16.16	10.19	13.62	11.85	12.23	17.28	15.27	10.16	19.44	9.41	8.24	18.15	11.69	12.44	20.34	10.87	9.35	20.42
ENSG00000037897|METTL1	14.82	12.8	8.85	16.13	4.71	6.44	6.39	5.87	6.99	19.62	11.43	5.33	15.59	5.5	7.71	15.55	28.56	14.09	12.06	11.1	8.72	17.68	9.69	12.07	25.07	19.3	14.07	12.44	20.51	13.53	14.58	14.46	17.35	16.8	19.54	12.09
ENSG00000037965|HOXC8	2.56	2.28	3.07	0	0	0	0	0	0.45	0	0.3	0	0	0	0	0	0	0	0	0	0	0	0	0	0	0	0	0	0	0.14	0	0	0.17	0	0	0
ENSG00000038002|AGA	15.75	23.47	7.35	18.36	7.1	5.55	7.42	10.96	12.11	19.19	16.03	7.76	19.02	12.18	12.3	23.17	16.03	13.71	18.54	8.76	14.56	16.47	17.35	6.69	23.68	37.44	10.63	15.14	18.58	10.13	12.13	19.27	17.24	22.53	20.64	7.98
ENSG00000038210|PI4K2B	15.61	11.04	5.88	16.92	6.51	6.4	7.59	6.36	7.99	13.33	8.13	3.77	12.19	10.35	5.5	13.96	7.97	7.6	11.26	9.72	5.52	17.16	17.19	8.78	9.97	13.98	9.68	12.52	10	7.84	12.17	13.42	9.1	9.98	11.74	9.21
ENSG00000038219|BOD1L1	49.49	42.46	68.4	40.04	74.69	73.56	61.25	57.75	54.86	43.66	49.92	51.7	40.36	41.08	45.86	76.59	29.53	79.83	40.58	46.79	50.39	58.76	59.38	70.21	77.48	57.66	74.32	70.29	71.43	75.51	69.06	60.26	67.84	78.25	70.46	85.21
ENSG00000038274|MAT2B	86.85	89.26	16.89	79.3	23.35	21.47	33.5	35.19	54.26	95.97	29	7.94	98.5	32.84	7.6	95.55	82.48	12.18	90.63	34.08	8.52	88.68	69.23	13.13	74.6	82.16	14.45	82.8	70.77	31.55	84.79	78.12	24.48	60.13	72.42	19.32
ENSG00000038295|TLL1	1.12	0.17	3.15	3.37	1.71	3.11	2.24	3.16	1.52	0.16	2.16	1.43	0.25	0.84	2.46	0	0	0.26	0.2	2.28	1.55	0	0.48	1.32	0	0.11	0.26	0.15	0.15	1.08	0	0	0.04	0	0	0.12
ENSG00000038358|EDC4	50.11	52.81	56.61	66.59	69.61	62.69	56.1	37.85	66.43	67.02	58.08	48.96	56.21	59.15	64.64	77.04	63.93	88.94	63.5	53.26	67.82	77.79	69.62	121.7	77.84	70.29	99.81	70.82	69.51	105.76	84.74	79.54	100.11	79.39	60.67	96.64
ENSG00000038382|TRIO	130.33	106.71	302.49	85.57	353.24	286.18	249.04	156.39	242.99	120.06	174.86	236.35	138.01	195.82	241.61	207.17	56.09	286.92	134.75	167.76	215.77	159.48	211.26	273.31	202.48	163.81	252.55	238.23	296.57	280.17	294.07	299.63	360.19	203.41	181.18	287.57
ENSG00000038427|VCAN	266.45	233.33	106.31	324.28	103.9	91.96	79.14	107.52	201.63	199.44	94.72	68.33	184.45	98.26	73.59	200.88	88.37	83.28	267.54	125.55	78.52	240.64	234.43	229.74	168.25	172.67	95.28	191.68	160.36	232.67	208.63	208.66	267.72	172.66	149.46	150.58
ENSG00000038532|CLEC16A	17.91	14.9	29.42	17.9	35.38	32.5	30.61	20.5	27.65	19.34	24.9	27.27	19.66	22.82	23.08	25.59	18.88	25.81	18.18	27.11	25.4	19.92	22.48	23.56	25.1	22.83	29.57	16.65	18.6	22.23	28.49	25.23	29.1	28.68	27.27	34.08
ENSG00000038945|MSR1	0	0	0.7	0	0	0	0	0.31	0	0	0	0	0	0	0	0	0	0	0	0	0.07	0	0	0	0	0	0	0	0	0.46	0	0	0	0	0	0
ENSG00000039068|CDH1	1.9	1.79	1.26	0.45	0.69	0.77	0.71	4.9	0.77	0.59	0.5	1.09	0.8	0.25	1.49	0.48	0.62	0.96	0.06	0.41	0.6	0.95	0.84	0.41	0.41	0.42	1.32	0.52	2.03	11.92	0.43	0.62	0.77	0.06	0.06	1.95
ENSG00000039123|MTREX	84.97	77.05	88.27	76.11	89.75	57.8	56.01	77.53	73.72	56.73	67.23	57.91	56.88	49.54	60.3	64.15	43.61	62.9	73.24	57.91	65.98	64.87	50.92	43.38	92.71	72.65	52.52	58.99	61.13	49.4	78.35	61.03	50.97	73.67	60.77	51.39
ENSG00000039139|DNAH5	0.25	0.41	1.42	0.37	0.71	0.45	0.42	0.42	0.59	0.47	0.13	0.65	0.22	0.27	1.04	1.14	1.22	1.24	0.25	0.4	1.28	0.65	1.27	1.62	1.15	0.83	1.41	0.39	0.78	1.37	0.33	0.4	4.09	1.81	1.76	1.31
ENSG00000039319|ZFYVE16	47.47	73.02	38.91	97.17	63.82	48.99	53.78	57.85	53.55	39.12	32.37	49.53	45.79	42.87	44.86	56.1	35.87	36.86	43.39	43.05	40.79	57.79	62.35	38.28	47.9	46.76	37.26	52.74	60.92	43.44	74.13	68.4	38.51	68.9	36.27	36.28
ENSG00000039523|RIPOR1	27.8	45.33	70.27	29.27	74.77	98.26	72.18	56.53	66.75	47.62	64.77	91.57	42.09	50.78	100.82	48.33	53.22	76.14	38.8	57.53	90.58	53.15	58.76	108.07	46.6	50.32	93.19	40.89	66.98	78.43	59.73	57.37	88.33	46.19	51.39	88.37
ENSG00000039537|C6	0	0	0.23	0	0.44	0.08	0.07	0	0	0	0	0.08	0	0	0	0	0	0	0	0	0.07	0	0	0	0	0	0	0	0	0	0	0	0	0	0	0
ENSG00000039560|RAI14	61.48	59.87	41.34	49	12.15	32.61	45.23	35	46.69	63.99	67.83	88.31	59.54	68.62	73	71.76	39.52	58.4	56.78	121.36	81.54	72.42	69.88	51.37	80.43	60.92	48.67	42.46	29.11	26.22	42.43	39.13	55.37	26.99	33.45	35.92
ENSG00000039600|SOX30	0	0	0	0.16	0	0	0	0	0	0	0	0	0	0	0	0	0	0	0.33	0	0	0	0	0	0	0	0.32	0	0	0	0	0	0	0	0	0
ENSG00000039650|PNKP	79.85	63.74	40.03	60.96	47.53	51.39	63.42	50.77	81.72	65.13	54.27	66.91	59.41	58.67	53.24	86.89	78.44	81.54	90.61	61.2	57.9	80.52	82.35	84.72	95.59	102.86	70.13	49.2	56.61	77.28	81.24	81.7	88.25	82.28	80.8	90.61
ENSG00000039987|BEST2	0.13	0.75	0	0.13	0.57	1.98	0.43	0.33	1.56	1.04	0.15	3.38	0.14	0	0.13	0.14	0.11	1.98	0.71	0	0.94	0.14	1.97	0.82	0.31	0.14	1.48	0.15	0.29	0.83	0.59	0.89	0.34	0	0.15	0
ENSG00000040199|PHLPP2	13.95	12.71	18.36	13.57	18.11	18.96	15.85	15.57	15.46	12.15	13.26	14.53	13.03	11.4	14.55	16.29	5.23	18.02	12.49	14.83	15.99	13.4	15.59	17.46	14.64	13.88	16.6	16.39	18.35	19.53	14.94	15.6	18.04	14.75	13.39	16.49
ENSG00000040275|SPDL1	52.12	54.17	40.21	54.12	42.94	34.28	24.86	42.2	31.97	45.22	26.85	25.06	30.21	32.98	23.11	45.45	31.84	35.32	39.5	29.08	22.12	50.69	42.08	37.89	36.89	44.77	40.97	59.19	61.48	52.56	50.96	49.77	38.92	43.24	36.32	44.75
ENSG00000040341|STAU2	83.32	72.2	145.35	70.32	164.81	129.34	111.65	120.84	141.74	78.26	126.94	129.61	83.23	123.38	123.82	74	35.78	121.81	78.36	112.26	113.38	84.3	87.46	121.68	63.26	64.1	101.91	66.54	62.21	92.65	78.82	79.78	112.24	59.35	45.71	96.58
ENSG00000040487|PQLC2	14.88	13.81	25.13	20.07	24.04	18.28	21.29	15.87	17.56	15.54	16.32	20.43	15.77	18.12	17.94	20.14	20.22	21.02	16.77	18.82	14.13	17.82	15.93	21.78	19.33	23.39	20.88	13.74	17.31	21.23	19.78	18	25.28	22.74	26.07	21.44
ENSG00000040531|CTNS	16.16	7.84	10.61	15.72	12.87	11.05	9.78	13.4	7.26	9.39	10.02	6.34	10.66	8.82	6.79	17.3	11.31	13.23	11.62	12.92	6.5	11.06	13.34	8.26	16.15	18.99	8.2	8.06	9.27	5.55	11.24	14.14	6.55	13.06	20.2	7.85
ENSG00000040608|RTN4R	15.34	23.28	17.27	22.15	18.19	19.23	14.41	13.68	14.35	15.47	17.56	18.39	15.59	19.46	17.41	10.59	13.35	16.23	15.3	16.89	17.03	14.69	11.78	19.62	9.81	11.09	19.63	8.58	13	21.16	10.6	8.21	21.99	10.47	9.41	21.98
ENSG00000040633|PHF23	40.77	44.09	64.02	58.2	57.47	53.6	53.94	56.63	53.89	63.16	68.97	69.31	62.46	54.47	50.92	57.83	40.44	65.92	56.47	68.07	61.05	40.71	39.17	53.32	53.18	50.71	54.29	38.37	44.64	56.4	35.45	36.28	44.11	34.38	37.68	53.2
ENSG00000040731|CDH10	5.64	5.93	12.63	6.59	26.09	13.8	19.72	8.27	8.28	9.52	3.93	1.3	10.51	3.24	1.71	4.53	7.51	9.34	9.06	5.02	1.39	9.29	7.65	12.13	3.97	4.72	12.7	8.12	17.74	4.72	4.32	7.58	5	1.95	1.54	5.1
ENSG00000040933|INPP4A	29.33	26.97	55.52	28.43	54.17	52.04	46.98	33.97	43.5	30.6	45.63	54.16	30.98	42.86	57.63	43.85	16.64	46.88	30.08	43.59	57.72	37.24	37.13	46.95	38.54	30.97	44.41	24.41	27.72	43.24	29.97	31.05	49.99	33.84	29.53	47.81
ENSG00000041353|RAB27B	1.14	1.41	3.9	2.03	6.19	2.81	0.8	0.93	2.89	0.28	0.2	0.08	0.85	0.24	0.12	0.46	0.12	1.38	2.62	0.45	0.28	0.45	0.33	0.51	1.1	2.69	0.52	4.13	0.82	0.51	0.39	0.97	1.06	1.11	0.94	0.51
ENSG00000041357|PSMA4	496.17	404.7	332.41	450.29	308.91	349.45	318.24	417.57	360.13	434.82	420.57	316.07	414.17	412.59	283.73	300.34	461.55	291.9	421.38	448.51	325.15	383.88	370.92	370.53	363.17	320.11	332.26	400.01	365.94	329.06	419.43	367.8	394.32	349.82	334.52	349.49
ENSG00000041515|MYO16	0.77	1.16	6.5	0.69	8.74	5.97	4.43	2.85	2.54	0.13	0.58	1.75	0.56	0.68	1.27	4.09	1.17	1.64	0.4	0.64	1.48	2.71	3.32	1.2	4.71	6.39	1.26	1.1	1.96	3.86	1.67	1.42	4.46	4.98	5.59	3.33
ENSG00000041802|LSG1	56.09	49.72	46.08	64.26	37.43	36.05	29.85	34.88	30.23	52.87	54.5	39.28	48.37	37.04	32.04	65.75	42.19	70.53	54.97	37.56	31.31	49.41	54.05	51.56	71.93	62.32	49.09	50.33	60.24	77.04	47.46	51.36	49.86	88.1	61.07	69.48
ENSG00000041880|PARP3	6.23	4.69	6.82	4.68	10.9	5.12	6.8	3.6	6.44	3.63	7.28	2.96	6.65	6.4	5.44	5.61	3.52	6.77	2.78	6.3	4.58	8.54	5.37	7.01	6.33	5.39	13.81	7.75	4.67	11.79	5.3	3.37	9.92	9.04	6.85	7.7
ENSG00000041982|TNC	5.59	2.33	1.54	7.26	2.41	2.96	5.55	6.33	1.58	8.71	2.92	0.52	9.82	4.83	0.84	130.23	77.21	1.47	4.72	3.86	3.17	74.32	83.21	3.53	178.6	245.71	4.77	47.33	84.66	7.88	55.55	91.31	12.9	291.41	437.39	6.15
ENSG00000041988|THAP3	22.98	29.48	25.11	25.97	29.77	34.87	22.45	31.11	27.63	27.07	23.85	32.4	33.19	29.16	34.97	30.17	35.92	48.1	21.61	21.56	23.98	30.28	26.7	50.89	31.38	25.95	57.43	26.04	27.47	38.64	32.59	24.46	41.02	31.36	27.57	46.23
ENSG00000042062|RIPOR3	0.95	2.39	0.55	0.55	1.28	0.42	0.88	1.12	0.44	0.84	1.28	0.35	1.69	0.83	1.11	1.37	5.02	1.34	2.39	0.87	0.36	2.31	1.29	0.58	0.9	2	0.71	0.97	3.03	0.41	1.33	2.07	0.2	0.33	0.82	2.35
ENSG00000042088|TDP1	34.69	39.76	22.69	35.3	28.48	21.17	19.47	20.93	43.58	26.58	16.76	12.91	30.28	23.65	12.38	20.54	12.09	19.5	27.28	20.49	12.38	22.92	20.37	24.39	16.44	13.04	12.26	28.82	22.43	21.75	27.48	27.55	25.41	10.62	15.04	18.14
ENSG00000042286|AIFM2	3.05	2.46	4.46	2.7	3.95	3.19	4.08	1.86	3.99	2.92	2.64	3.68	3.13	2.29	4.49	7.14	4.16	4.35	3.1	2.25	3.28	7.35	7.08	1.88	8.27	10.31	3.37	5.41	5.36	6.55	3.91	3.72	5.35	8.19	10.38	3.9
ENSG00000042304|C2orf83	0.32	0.61	0.33	0.14	0.2	0	0	0	0.16	0.14	0.46	0.35	0	0.31	0.28	0.36	0	1.44	0.29	0	0.14	0.02	0	0.17	0	0.75	0.42	0.3	0	0.84	0.38	0.15	0	0.16	0.31	0
ENSG00000042317|SPATA7	22.77	30.94	34.2	22.1	29.99	28.66	30.49	26.13	30.54	18.85	24.87	24.56	19.42	19.74	24.54	20.79	19.6	24.17	22.95	15.68	28.08	22.42	21.98	26.91	16.41	17.68	24.09	20.63	23.34	28.1	22.78	21.72	31.13	22.66	24.99	24.84
ENSG00000042429|MED17	77.77	70.72	65.44	78.13	68.95	87.32	88.66	96.03	83.68	88.93	98.63	79.21	97.93	93.07	79.03	110.49	72.74	93.52	91.17	91.14	77.94	92.59	91.59	115.64	95.18	85.05	86.35	103.35	101.55	103.07	105.74	84.05	91.64	94.95	86.98	93.11
ENSG00000042445|RETSAT	11.51	12.51	13.24	11.14	17.65	14.9	17.06	16.01	15.59	18.55	15.65	14.68	12.27	14.55	16.24	14	16.08	14.54	17.94	18.32	14.29	16.7	18.68	18.12	16.32	19.61	16.72	15.17	11.98	13.36	13.41	15.74	13.81	12.27	15.76	9.56
ENSG00000042493|CAPG	19.31	25.01	0	29.48	0	0.99	1.11	5.27	5.61	27.21	12.47	1.58	36.87	18.2	1.7	17.09	50.22	2.69	26.32	14.33	1.01	36.54	34.62	11.96	8.58	24.73	4.47	28.73	14.28	4.61	20.16	20.1	7.31	9.25	9.25	5.47
ENSG00000042753|AP2S1	89.32	82.06	130.26	93	90.39	120.64	115.25	119.84	75.71	81.98	118.2	132.44	88.54	125.57	131.56	43.69	163.68	92.52	86.48	110.23	157.02	73.93	73.14	110.09	46.95	61.76	96.67	79.79	81.52	130.69	54.7	106.43	66.59	56.24	72.81	100.54
ENSG00000042781|USH2A	0.07	0.02	0.07	0.07	0.1	0.06	0.07	2.78	0.09	0.06	0.01	0	0.01	0.01	0	0.02	0	0.03	0.02	0.01	0	0.04	0.02	0.03	0	0.05	0.01	0.06	0.06	1.45	0.04	0.04	0.1	0.06	0	0.03
ENSG00000042813|ZPBP	0	0	0	0	0	0	0	0	0	0	0	0	0	0	0	0	0	0	0	0	0.94	0	0	0	0	0	0	0	0	1.01	0	0	0	0	0	0
ENSG00000042832|TG	0.44	0.78	0.62	0	1.84	2.21	0.05	0.55	0	0.15	1.74	1.23	0.46	0.64	1.98	2.25	3.36	4.14	0.08	0.66	0.81	1.45	1.64	2.33	5.64	0.9	5.1	0.08	0.16	4.68	1.76	0.67	6.76	2.15	1.98	2.05
ENSG00000042980|ADAM28	1.51	3.27	4	0.8	2.68	1.84	2.36	1.7	0.14	0.97	0.16	0.04	0.16	0	0.24	1.16	0.65	27.5	0.03	0	0	0.37	0.37	10.65	1.06	1.97	17.93	4.15	2.06	12.19	0.76	2.71	27.34	1.29	2.03	38.68
ENSG00000043039|BARX2	0.14	0.25	0.14	0.25	0.17	0	0.12	0.43	0	0	0.26	0.3	0	0	0	0.47	0.09	0	0	0.27	0	0.25	0.11	0.42	0.41	0.12	0	0.25	0.29	0.12	0.21	0.09	0.29	0	0	0.12
ENSG00000043093|DCUN1D1	31.24	28.71	33.76	31.07	31.8	38.21	31.67	35.56	25.84	27.6	33.49	39.8	28.34	29.51	36.46	32.38	19.57	38.49	26.1	29.11	34.09	28.21	34.2	36.22	28.42	29.22	39.52	39.38	38.49	37.01	34.99	39.79	40.5	27.37	26.67	32.15
ENSG00000043143|JADE2	0.34	1.85	4.11	2.23	3.13	2.17	2.64	1.33	1.02	2.69	3.53	3.83	1.48	1.61	5.12	2.16	1.26	5	1.15	1.38	3.15	1.58	3.56	4.54	5.46	3.9	6.93	0.64	2.47	7.11	0.8	2.24	6.89	2.45	1.7	6.18
ENSG00000043355|ZIC2	53.92	63.37	56.66	71.29	126.77	92.56	205.62	69.76	54.07	41.43	12.88	2.23	30.11	25.8	2.07	25.99	16.25	0.33	36.98	17.68	4.23	32.24	17	3.29	28.06	29.55	0.56	29.18	17.83	7.45	15.81	25.34	0.2	38.82	26.35	3.14
ENSG00000043462|LCP2	0.05	0	0.06	0	0.07	0	0	0.06	0	0	0	0	0	0	0	0	0	0	0	0	0	0	0	0	0	0	0	0	0	0	0	0	0	0	0	0
ENSG00000043514|TRIT1	48.7	51.27	61.38	43.64	93.23	70.13	66.11	71.58	44.81	60.2	44.5	53.93	52.36	45.72	56.91	48.25	36.33	69	56.97	54.22	63.34	39.27	43.52	62.49	62	45.52	64.83	57.24	44.67	74.58	51.65	46.55	71.74	41.54	66.84	68.61
ENSG00000043591|ADRB1	0	0	0.2	0	0.12	0.31	0.27	0	0	0	0	0.11	0.09	0	0	0	0	0	0	0	0.09	0	0.08	0.1	0	0.09	0.42	0	0.45	0	0.15	0.28	0	0	0.09	0.17
ENSG00000044012|GUCA2B	0	0	0	0	0	0	0	0	0	0	0	0	0	0	0	0	0	0	0	0	0	0	0	0	0	0	0	0	0	0	0	0	0	0	0	0
ENSG00000044090|CUL7	27.88	30.68	29.08	30.97	33.76	28.08	27.45	20.69	27.68	21.2	24.36	24.95	21.52	25.3	27.83	26.17	15.58	30.81	22.65	24.65	24.73	24.48	20.17	31.97	25.96	24.31	31.44	14.13	14.21	22.24	13.17	11.4	26.01	22.06	19.76	29.86
ENSG00000044115|CTNNA1	140.42	149.11	100.47	181.07	112.4	143.7	127.1	123.81	149.96	166.07	119.25	99.12	170.47	120.06	106.2	202.36	200.53	110.51	188.84	118.17	86.73	216.46	243.3	139.8	226.92	254.8	129.96	183.27	186.37	154.01	203.21	175.57	177.2	196.61	250.68	146.27
ENSG00000044446|PHKA2	14.7	25.23	12.14	28.6	16.97	11.68	19.84	13.5	15.4	22	16.97	19.07	15.49	16.55	13.82	21.94	22.91	38.61	17.4	21.39	21.92	15.77	22.34	25.28	22.46	20.44	33.85	22.29	27.43	31.59	20.49	16.67	48.22	22.45	24.5	45.26
ENSG00000044459|CNTLN	39.44	38.34	3.62	34.15	3.65	5.43	4.14	7.43	14.4	31.85	11.34	5.03	26.75	13.03	4.26	17.95	13.57	5.89	34.31	13.84	3.38	30.37	25.42	6.29	16	18.31	4.37	18.44	14.31	4.01	20.89	22.76	4.24	10.4	13.56	4.02
ENSG00000044524|EPHA3	58.91	52.47	35.89	39.53	73.44	41.37	79.15	57.05	78.76	56.42	19.5	1.28	62.08	22.04	2.88	85.8	38.42	219.97	42.78	18.22	2.56	74.94	93.85	224.54	82.47	61.05	190.22	55.64	36.96	259.66	70.55	32.98	295.5	107.12	74.75	236.68
ENSG00000044574|HSPA5	247.95	375.42	156.08	237.91	159.7	218.53	153.54	222.08	204.94	128.9	159.23	115.7	158.87	129.2	107.09	1080.23	1073.67	401.54	255.81	196.64	160.89	142.84	135.12	134.41	1283.94	1444.06	387.26	362.81	322.5	204.95	225.74	223.1	147.3	1183.85	1471.62	366.91
ENSG00000046604|DSG2	18.43	23.01	0.82	27.27	0.06	1.66	3.37	4.85	7.44	12.21	3.74	1.91	11.58	5.95	1.84	9.94	4.53	1.36	13.09	5.85	1.28	10.86	12.67	0.93	7.47	10.44	1.03	3.72	2.07	0.15	3.5	3.29	0.34	4.44	4.64	0.57
ENSG00000046647|GEMIN8	23.3	31.96	35.84	26.51	42.22	37.47	37.92	18.44	41.47	25.74	22.92	32.5	27.22	27.61	39.98	38.26	34.6	29.56	22.37	21.92	37.45	50.09	44.93	30.69	35.44	43.89	29.9	26.01	40.79	21.44	35.17	49.45	26.56	30.22	33.78	25.81
ENSG00000046651|OFD1	41.22	42.23	30.95	30.13	51.11	37.62	27.68	28.54	40.58	43.78	29.13	44.51	23.99	36.99	27.15	40.98	35.87	40.85	39.54	29.72	31.51	48.96	41.54	37.5	40.37	39.97	31.49	39.85	45.04	27.29	43.64	43.08	43.55	37.94	39.48	32.3
ENSG00000046653|GPM6B	264.08	231.78	243.88	256.3	247.26	239.75	340.41	443.15	326.8	451.8	413.7	283.66	479.93	421.69	269.13	505.97	458.47	332.06	390.82	413.17	289.35	662.45	731.74	346.55	406.29	572.58	281.09	743.03	758.41	395.39	622	708.49	367.42	376.99	493.04	321.65
ENSG00000046774|MAGEC2	0	0	0	0	0	0.16	0	0	0	0	0	0	0	0	0	0	0	0	0	0	0.13	0	0	0	0	0	0	0	0	0.13	0.12	0	0	0	0	0
ENSG00000046889|PREX2	13.64	16.01	4.62	8.31	1.42	1.63	3.02	3.92	6	12.8	7.26	0.21	12.87	5.76	0.57	17.72	7.02	0.98	12.58	5.94	0.6	15.89	15.77	1.4	10.37	14.37	1.19	4.44	4.07	0.44	2.57	2.67	0.23	4.12	5.59	0.41
ENSG00000047056|WDR37	20.19	18.38	42.71	18.97	49.98	42.97	39.46	32.6	33.31	18.45	25.88	35.46	17.72	25.45	33.94	24.37	12.4	36.58	18.4	26.61	30.57	17.93	20.44	31.49	26.39	22.12	32.39	19.09	22.38	34.41	22.36	19.03	28.52	26.56	18.77	37.83
ENSG00000047188|YTHDC2	57.47	44.89	69.26	46.23	79.33	70.95	60.59	58.4	69.73	42.04	46.85	53.56	47.23	48.91	55.96	54.19	21.79	63	43.66	60.15	51.62	47.71	58.79	54.68	51.64	50.47	63.61	46.47	51.55	70.38	47.24	54.57	69.4	56.32	42.29	67.8
ENSG00000047230|CTPS2	73.35	58.06	54.39	70.26	75.54	68.22	58.78	58.23	73.37	72.23	57.44	53.53	83.76	59.63	57.85	75.03	46.38	66.29	73.29	58.71	46.73	77.82	65.18	54.51	73.31	60.22	40.26	68.43	65.46	54.91	56.34	70.58	67.1	51.12	48.65	44.1
ENSG00000047249|ATP6V1H	35.99	36.89	90	36	98.78	94.99	83.67	77.1	69.2	50.97	72.34	91.47	49.91	72.34	83.07	59.57	87.32	64.46	42.68	77.77	90.92	56.91	53.43	64.5	68.07	63.93	62.7	53.63	52.93	67.95	42.73	49.99	61.42	64.31	77.64	75.35
ENSG00000047315|POLR2B	172.06	156.25	240.72	136.03	236.19	197.22	238.42	262.41	192.85	193.49	220.39	197.29	171.6	197.59	212.45	194.57	139.66	239.31	184.56	245.62	215.84	161.61	168.24	236.16	229.43	158.78	236.57	185.04	179.67	219.06	201.64	155.25	225.88	182.05	158.21	217.94
ENSG00000047346|FAM214A	52.43	42.07	64.26	34.53	88.94	74.53	73.83	57.06	77.17	55.77	45.09	43.05	53.75	47.62	41.29	93.78	65.02	59.82	47.72	50.69	40.07	73.47	77.43	53.06	80.27	74.69	55.78	111.54	136.41	71.65	104.55	121.52	81.22	92.73	81.59	46.97
ENSG00000047365|ARAP2	0.26	0.35	0.87	0.22	0.17	0.46	2.56	0.23	3.22	1.09	0.51	0	1.17	0.37	0	10.5	4.11	2.8	0.32	0.48	0	12.86	15.97	0.79	10.99	16.54	0.31	16.22	19.72	1.94	17.29	24.08	0.78	9.73	20.1	0.54
ENSG00000047410|TPR	82.76	66.62	59.37	77.6	61.65	47.08	55.72	74.15	64.78	61.99	49.86	52.59	52.11	55.42	42.64	104.46	42.16	63.32	88.79	56.43	61.94	79.28	85.54	53.09	80.67	80.27	55.44	79.66	73.6	59.05	71.93	83.11	57.68	78.7	65.48	62.19
ENSG00000047457|CP	0.17	1.22	0.31	2.58	0	0.14	1.51	2.32	0	0.17	0.09	0	0.7	0.45	0	0.71	0	0	8.41	1.27	0.15	1.81	0.8	0	2.77	1.45	0.43	12.87	2.21	0.12	3.48	0.16	0	14.8	2.92	0.25
ENSG00000047578|KIAA0556	13.59	9.76	10.95	19.78	10.88	20.46	11.14	11.22	13.23	9.1	15.38	15.67	8.94	12.17	17.36	16.39	3.95	9.44	15.66	15.36	12.09	10.15	12.91	13.59	11.61	12.82	11.33	12.35	12.15	21.09	18.59	26.63	10.04	10.16	18.95	8.27
ENSG00000047579|DTNBP1	21.65	17.55	23.64	20.06	24.62	26.64	23.5	26.66	25.98	18.75	22.54	33.06	12.92	21.18	29.29	14.36	14.71	26.67	13.36	15.01	23.46	13.44	11.59	19.17	14.7	17.7	32.63	9.03	13.74	21.94	10.81	10.49	20.7	12.39	15.33	25.65
ENSG00000047597|XK	1.15	0.27	6.9	1.24	5.65	5.76	3.11	4.35	2.16	0.34	2.16	4.03	0.51	2.97	4.88	0.22	0.27	3.58	0.59	2.03	5.45	0.05	0.56	2.52	0.1	0.37	2.55	0.14	0.23	1.24	0.08	0	0.7	0.25	0.43	1.33
ENSG00000047617|ANO2	1.33	1.19	4.07	2.9	0.84	1.02	3.49	0.89	3.71	0.26	1.35	0	0.63	0.31	0	0.19	0	0	0.57	0.36	0.26	0.29	0.06	0	0	0.3	0	1.45	1.14	10.47	0.5	0	0	0.07	0.07	0
ENSG00000047621|C12orf4	31.05	22.6	46.04	30.56	42.16	39.22	29.76	35.97	30.53	21.92	27.83	42.16	25.84	33.19	36.05	26.67	21.04	35.95	23.86	30.53	38.86	18.96	28.43	34.76	31.22	24.45	30.38	32.84	27.05	32.05	31.61	24.34	29.82	31.08	30.95	28.55
ENSG00000047634|SCML1	0.27	0.96	0.11	0.09	0.13	0.88	0.19	0	0	0.53	0.3	0.79	0.67	0.05	0.38	0	0	0.14	0.37	0.1	1.48	0.38	0.25	0.66	0	0.2	0.71	0.1	0.21	0.76	0	0	0.51	0.31	0.4	0
ENSG00000047644|WWC3	11.44	11.11	16.76	12.02	17.95	14.58	23.66	9.48	12.65	12.51	9.53	9.24	13.46	8.84	9.08	16.06	8.36	14.09	11.62	11.3	8.67	16.99	16.03	10.03	15.49	15.39	8.56	13.78	16.87	9.08	15.37	19.51	8.49	13.87	15.86	10.1
ENSG00000047648|ARHGAP6	1.2	0.62	1	0.6	0.8	2.05	0.69	0.55	0.61	0.18	0.2	0.05	0.06	0.07	0	0.18	0.09	0	0.06	0.14	0.06	0.45	0.43	0.48	0.49	0.54	0.11	0.59	0.45	0.11	0.32	0.43	0.09	0.41	0.16	0.06
ENSG00000047662|FAM184B	3.22	2.52	6.66	2.91	6.35	7.05	4.83	3.56	3.98	5.34	4.47	9.16	4.49	6.27	7.34	9.44	2.64	6.96	4.82	5	7.53	9.36	8.23	6.36	7.5	6.97	8.88	10.04	4.76	5.58	4.69	3.89	5.2	3.29	3.56	6.91
ENSG00000047849|MAP4	103.99	100.63	275.32	152.58	326.87	320.93	251.33	215.1	197.59	107.35	178.41	217.56	128.52	187.43	210.68	172.56	98.42	208.71	109.79	159.98	213.24	132.02	177.08	215.01	191.83	166.33	195.74	103.78	159.79	229.72	130.1	129.78	266.1	177.13	160.15	206.11
ENSG00000047932|GOPC	48.63	45.13	60.91	38.3	55.72	54.44	43.66	44.95	49.62	44.45	47.56	48.31	47.68	43.68	43.56	70.24	39.82	58.5	47.63	44.73	47.69	51.33	55.66	58.49	72.84	63.02	64.65	57.94	65.35	66.38	58.72	54.72	63.03	65.85	58.55	57.79
ENSG00000047936|ROS1	0	0	0	0	0	0	0	0	0	0	0	0	0	0	0	0	0	0	0	0	0	0.03	0	0	0	0	0	0	0	0	0	0	0	0	0	0
ENSG00000048028|USP28	71.9	80.73	30.93	57.98	34.93	45.25	30.66	39.74	53.05	58.76	42.71	30.91	66.73	38.22	46.34	46.69	12.91	31.2	69.91	39.21	32.55	66.65	55.05	63.26	26.82	45.69	22.71	53.2	47.63	37.25	69.87	70.84	41.3	33.69	38.37	26.72
ENSG00000048052|HDAC9	63.75	73.34	23.5	81.47	16.15	15.05	25.48	29.75	35.06	73.64	24.62	13.17	75.59	22.81	8.79	77.33	32.34	14.79	82.65	31.99	14.7	80.05	56.71	11.97	65.88	71	18.84	52.34	33.53	13.6	51.19	41.09	6.49	66.03	55.35	13.56
ENSG00000048140|TSPAN17	33.46	26.36	63.45	38.6	51.99	68.87	64.24	77.87	51.19	35.59	89.99	81.37	43.53	91.04	70.75	30.69	28.74	82.18	32.15	69.05	75.75	29.35	40.77	71.65	36.61	35.37	62.29	32.38	32.87	57.61	39.09	30.07	59.37	33.84	32.14	51.24
ENSG00000048162|NOP16	37.05	41.12	49.97	39.11	40.16	56.23	42.66	38.73	39.1	33.76	38.49	44.28	47.67	35.9	42.09	38.49	42.2	48.61	54.77	42.07	35.04	48.99	50.42	46.1	41.58	41.51	57.05	41.62	42.17	55.22	34.13	39.18	50.3	45.28	44.66	64.68
ENSG00000048342|CC2D2A	19.37	15.07	11.85	20.8	8.55	6.55	7.9	22.82	9.83	20.43	20.35	14.8	21.72	20.67	16.02	27.96	37.01	27.68	27.78	21	20.69	24.01	30.26	15.74	25.61	26.55	21.57	20.84	32.24	26.26	19.65	25.29	13.1	20.13	22.55	19.4
ENSG00000048392|RRM2B	18.63	18.26	18.46	20.39	19.25	15.61	32.65	23.28	16.58	33.14	24.63	27.92	19.56	19.19	25	32.94	17.23	30.26	22.24	22.29	26.82	25.32	24.43	25.56	38.16	43.43	23.99	25.29	24.07	26.9	18.78	18.39	20.43	32.01	26.89	26.13
ENSG00000048405|ZNF800	19.42	20.3	9.1	18.1	10.67	9.29	11	8.93	10.63	18.68	6.22	5.47	13.85	5.16	5.16	22.17	9.14	8.74	13.63	9.93	7.17	17.74	13.22	8.39	17.79	19.25	5.9	22.39	20.3	10.67	18.12	22.33	6.21	17.42	20.77	11.11
ENSG00000048462|TNFRSF17	0	1.09	0	0	1.81	0	1.34	0	2.17	0.62	0	0	0	0	0	0	0.74	0	0	0.36	0.62	0	0.29	0.8	0.38	0	0.32	0	0.34	1.24	0.55	0	0.4	0.74	0.7	0.66
ENSG00000048471|SNX29	7.49	8.75	11.27	9.97	15.89	11.53	15.18	10.39	12.59	10.19	12.24	11.17	11.33	12.91	11.67	10.66	6.23	12.16	11.09	12.86	14.09	9.53	10.91	10.66	10.19	10.6	11.73	13.95	13.94	14.08	11.69	12.28	14.26	10.71	10.82	13.87
ENSG00000048540|LMO3	23.3	19.7	265.94	21.32	64.47	167.81	45.46	69.41	51.71	17.33	116.27	874.69	20.58	125.75	1017.01	28.59	27.37	227.11	16.33	104.5	905.37	44.34	55.37	205.62	17.96	34.98	201.92	57.4	91.26	116.28	48.52	57.42	105.04	11.03	15.2	83.84
ENSG00000048544|MRPS10	34	34.14	39.23	29.88	32.36	34.19	33.21	31.03	29.02	35.41	35.63	42.27	37.15	33.31	36.67	41.02	35.77	31.91	33.28	31.8	38.36	35.87	35.98	33.37	44.46	38.76	35.02	42.58	38.4	37.93	36.22	38.47	37.64	38.11	42.55	38.23
ENSG00000048545|GUCA1A	2.37	1.96	2.84	3.42	3.4	5.22	3.96	3.56	2.85	2.16	1.31	3.02	4.88	3.39	3.87	1.56	2.76	5.11	1.96	4.27	3.28	3.58	3.62	3.52	2	3.44	2.55	0.74	0.91	2.03	2.31	1.49	2.13	2.75	2.45	1.86
ENSG00000048649|RSF1	115.5	169.7	146.03	111.3	157.67	150.4	129.35	190.88	176	129.54	131.18	105.3	108.37	105.48	113.11	156.73	134.23	197.76	93.87	146.83	116.53	129.49	148.35	126.86	160.62	160.87	143.9	164.04	161.93	117.78	169.7	119.62	152.72	173.58	127.43	132.95
ENSG00000048707|VPS13D	24.28	20.57	35.64	21.94	35.6	36.83	35.12	23.05	26.68	23.97	25.43	32.37	24.7	28.52	36.74	36.91	23.33	39.69	23.16	28.24	37.02	43.14	24.66	36.18	26.21	29.23	40.86	26.3	30.46	35.86	27.39	27.71	36.98	27.39	29.79	51.58
ENSG00000048740|CELF2	76.34	65.3	320.56	73.58	155.11	203.22	196.82	203.21	160.31	100.67	195.82	278.11	117.04	181.68	262.64	154.02	59.8	266.01	95.58	193.42	294.29	132.93	144.38	218.13	137.63	116.96	219.56	105.79	113.29	201.72	113.51	107.15	189.57	136.93	118.2	203.37
ENSG00000048828|FAM120A	30.08	30.55	22.9	34.82	19.94	24.42	19.47	15.26	23.47	36.66	29.87	25.62	35.84	28.76	21.88	38.92	22.75	26.42	40.14	32.03	31.25	35.91	42.41	28.66	39.87	43.49	26.4	50.08	51.96	31.29	49.84	61.46	30.03	38.79	40.32	27.63
ENSG00000048991|R3HDM1	54.4	52.12	140.31	63.15	97.52	130.09	70.19	59.08	58.62	56.74	46.02	81.27	45.99	54.96	95.42	45.68	27.97	84.86	45.52	55.66	79.33	44.35	46.31	51.85	39.84	42.69	100.81	48.61	59.58	58.76	48.73	71.27	73.51	46.21	78.21	89.93
ENSG00000049089|COL9A2	11.31	9.31	13.95	26.39	20.05	16.41	17.15	17.32	15.87	11.75	12.98	3.69	13.35	15.92	11.63	17.41	15.72	32.69	10.54	12.35	0.84	18	24.26	42.43	27.96	11.27	26.56	20.89	10.7	14.43	13.57	9.42	49.92	18.42	12.62	24.55
ENSG00000049130|KITLG	5.66	6.2	5.41	5.08	7.77	5.3	4.06	3.34	3.18	5.65	2.26	0.41	3.77	2.1	0.04	3.27	3.98	12.74	5.05	2.48	0.68	9.21	16.76	6.26	5.09	7.83	19.61	44.24	76.74	8.02	24.84	39.6	5.63	5.33	8.33	8.03
ENSG00000049167|ERCC8	26.49	25.14	29.62	24.41	29.47	25.54	28.51	25.04	32.91	16.18	26.92	31.19	19.54	31.45	23.54	18.29	12.77	27.85	20.96	21.62	24.2	15.68	20.96	20.75	19.01	20.41	19.78	21.5	20.45	22.09	24.7	20.14	24.38	19.42	17.38	18.36
ENSG00000049192|ADAMTS6	15.32	12.35	0.52	27.57	0.32	3.71	1.59	4.25	8.42	8.35	3.56	1.18	9.34	7.44	0.38	8.81	6.05	2.11	5.55	3.24	0.96	11.69	10.07	1.16	8.77	11.02	1.88	8.63	11.76	1.22	11.14	13.65	2.32	2.92	16.26	1.91
ENSG00000049239|H6PD	15.77	15.26	7.55	19.6	8.36	6.38	7.89	5.66	9.27	14.8	10.02	9.95	15.18	10.79	10.71	16.41	7.54	9.14	15.06	12.18	10.51	15.78	15.33	8.87	15.24	17.76	9.19	16.59	16.56	12.23	16.56	17.62	10.39	16.73	19.16	11.77
ENSG00000049245|VAMP3	48.14	26.7	24.08	33.78	62.44	25.73	27.73	19.01	63.26	38.85	49.57	21.55	37.92	46.06	22.52	47.26	41.12	38.33	34.42	46.32	43.34	53.89	74.14	53.4	67.91	70.1	47.62	61.99	46.25	34.6	47.74	46.85	62.45	49.71	48.36	54.38
ENSG00000049246|PER3	7.06	9.02	7.34	7.54	13.84	10.32	9.58	5.61	8.39	8.05	6.42	6.74	7.84	5.53	5.4	16.79	9.41	7.17	4.98	5.96	3.92	12.55	12.51	10.39	16.02	18.31	7.94	14.45	12.93	10.85	9.99	14.66	11.18	13.09	13.37	9.22
ENSG00000049247|UTS2	0	0	1.12	0	0	0	0	0	0	0	0	0	0	0	0	0	0	0	0	0	0	0	0	0	0	0	0	0	0	0	0	0	0	0	0	0
ENSG00000049249|TNFRSF9	0.07	0.07	0.22	0.07	0.05	0	0.16	0.32	0.25	0.07	0.22	0	0.17	0.04	0.17	0.23	0.06	0.1	0.04	0.13	0.15	0.23	0.16	0.09	0.13	0.24	0.29	0.16	0.08	0.26	0.07	0.16	0.29	0.3	0.14	0.22
ENSG00000049283|EPN3	0	0.11	0	0	0	0.13	0	0	0	0	0.17	0	0	0.13	0	0.35	0	0.08	0	0.06	0.16	0.13	0	0.15	0	0	0.37	0	0	0.42	0.05	0	0.2	0.18	0	0.44
ENSG00000049323|LTBP1	19.33	28.67	0.96	33.84	1.63	2.59	3.68	6.12	14.97	41.5	11.92	0.76	33.09	14.01	1.28	59.31	31.49	0.6	46.79	18.43	1.71	65.85	50.05	3.93	40.39	67.08	1.73	41.61	44.37	2.23	38.68	61.08	2.57	53.87	62.22	0.5
ENSG00000049449|RCN1	256.13	248.52	49.35	280.39	59.9	58.91	73.93	96.87	170.7	221.24	62.5	15.58	201.41	70.24	15.6	247.01	289.5	41.02	234.61	99.38	19.04	192.99	157.5	36.74	266.73	339.15	52.01	164.54	133.64	39.48	132.89	137.92	28.47	205.92	277.22	44.84
ENSG00000049540|ELN	19.21	38.29	4.96	45.42	4.21	6.93	7.43	9.22	11.13	27.6	5.26	0.37	25.77	9.3	0	11.24	3.02	1.68	20.76	17.4	0.27	12.36	7.32	2.98	11.27	5.51	2.51	20.7	11.36	14.11	13.71	17.33	5.66	12	4.3	3.36
ENSG00000049541|RFC2	72.41	60.47	27.98	70.26	41.39	35.97	35.5	28.67	43.71	58.87	37.98	17.92	45.34	30.26	18.27	28.69	38.44	19.04	50.85	33.73	23.07	57.21	42.43	19.74	22.85	27.05	29.74	75.28	44.6	37.4	42.66	78.53	31.81	37.29	31.02	45.32
ENSG00000049618|ARID1B	47.67	50.17	45.2	47.08	76.62	71.09	65.69	40.5	51.41	45.1	51.52	53.74	50.62	54.33	58.18	58.6	28.53	62.9	52.28	61.25	55.94	46.43	48.08	58.37	52.69	49.05	64.59	70.17	75.21	62.31	71.96	77.86	73.99	55.72	45.87	62.71
ENSG00000049656|CLPTM1L	126.2	98.16	127.26	110.26	114.72	136.67	92.13	85.4	104.29	108.47	116.15	110.49	102.11	114.24	131.08	206.04	92.44	184.86	112.99	109.18	124.01	91.06	109.85	148.84	180.45	182.79	137.14	149.05	110.23	138.73	132.4	101.52	142.92	222.17	211.18	153.9
ENSG00000049759|NEDD4L	185.61	104.13	171.86	76.52	185.68	152.81	193.13	112.98	201.04	216.6	160.42	198.78	284.53	190.89	120.71	308.75	146.45	173.02	215.51	164.57	90.35	294.62	351.86	210.96	291.76	245.3	174.97	212.18	207.51	282.57	261.42	242.52	297.56	264.84	248.39	253.02
ENSG00000049768|FOXP3	0.97	0.86	0.39	0.11	0.93	0.73	0.58	0.27	0.27	0	0.12	0.14	0.35	0.12	0.22	0	0.59	1.34	0.68	0.82	0.22	0.35	0.22	0	0.28	0.23	0.82	0.52	0.12	0.91	0	1.2	0.69	0.83	0.72	0.32
ENSG00000049769|PPP1R3F	7.98	7.52	18.43	11.24	17.95	19.86	16.07	12.41	16.26	9.28	16.35	13.9	10.55	13.24	13.46	15.81	10.58	18.64	11.4	12.84	21.08	13.12	11.48	18.76	12.25	14.89	16.69	13.35	12.02	16.17	12.18	13.88	17.92	15.08	16.63	20.24
ENSG00000049860|HEXB	28.84	36.28	18.59	34.16	20.03	21.4	19.01	17.76	25.34	22.91	21.92	13.64	21.15	13.62	18.61	27.01	39.26	14.51	20.4	12.72	10.22	29.96	36.72	21.08	26.89	35.19	15.33	21.42	23.81	16.84	24.63	30.29	19.79	26.7	43.26	16.57
ENSG00000049883|PTCD2	13.04	11.7	13.78	14.91	8.51	9.03	11.17	5.37	8.62	8.22	12.99	8.45	8.88	7.26	11.01	14.33	5.85	11.74	7.58	18.46	13.08	7.63	10.95	4.88	13.68	14.67	10.57	7.01	8.85	8.44	7.36	6.83	10.14	8.07	8.72	8.28
ENSG00000050030|NEXMIF	12.47	10.58	33.63	14.59	30.96	25.62	19.81	17.05	15.47	11.49	17.1	23.18	13.52	18.36	22.57	16.17	6.86	26.99	12.88	19.83	25.46	12.1	15.46	18.07	13.59	12.07	20.2	11.3	13.38	21.91	13.73	12.62	23.46	13.22	12.74	22.86
ENSG00000050130|JKAMP	52.6	53.31	41.16	53.04	67.19	47.35	51.05	60.34	55.77	55.25	52.67	43.66	66.7	54.49	41.83	67.46	54.16	32.99	63.55	40.28	50.02	63.3	77.13	30.85	77.84	81.97	43.96	87.44	76.73	50.67	81.73	84.95	40.7	73.44	76.5	39.34
ENSG00000050165|DKK3	67.85	90.16	93.64	82.3	120.91	120.83	72.24	87.32	109.16	213.31	121.58	166.14	169.94	138.09	205.87	106.85	133.75	114.17	119.55	102.38	151	212.97	168.77	124.19	82.04	118.64	97.95	197	125.42	77.28	33.29	50.81	82.37	58.63	77.97	72.31
ENSG00000050327|ARHGEF5	0.34	0.12	0	0.48	0.12	0	0.15	0.34	0	0.16	0	0.05	0.13	0.07	0	0.33	0.32	0.19	0.14	1.03	0	0.15	0.15	0.19	0.16	0.22	0.14	0.35	0	0.05	0	0.15	0.1	0.05	0	0.08
ENSG00000050344|NFE2L3	19.91	13.95	24.95	28.36	33.04	35.85	33.18	25.33	25.3	13.87	18.04	20.5	14.73	18.54	23.97	19.88	14.83	46.49	17.91	22.16	23.9	11.15	16.65	28.73	14.08	14.7	33.41	16.84	23.51	36.56	13.89	12.91	28.25	14.14	11.6	47.56
ENSG00000050393|MCUR1	14.13	11.26	20.75	14.74	11.98	17.49	12.09	16.42	15.11	15.64	54.67	42.91	24.39	59.83	44.28	22.19	19.93	83.74	16.74	42.84	36.16	16.28	25.48	80.26	22.72	28.31	70.64	13.04	13.43	48.02	12.33	13.04	60.53	18.37	23.3	56.57
ENSG00000050405|LIMA1	23.38	22.45	10.48	23.57	10.29	11.31	14.16	16.61	25.17	39.56	29.75	14.66	51.38	31.94	13.8	87.86	75.02	19.86	37.3	25.19	13.97	97.71	90.84	28.8	77.99	83.55	21.9	134.75	175.27	31.52	117.24	141.2	38.82	59.95	76.16	32.02
ENSG00000050426|LETMD1	58.28	38.66	77.77	51.3	87.9	72.46	57.87	51.82	41.09	38.22	37.3	52.41	31.88	40.69	72.49	46.31	50.4	60.33	47.3	35.2	46.46	46.84	37.94	44.52	37.94	38.39	64.83	53.3	52.07	62.53	40.94	22.68	61.1	28.76	30.13	47.82
ENSG00000050438|SLC4A8	49.57	40.65	80.96	35.02	93.6	83.73	93.18	60.95	72.64	34.66	43.06	47.03	36.59	37.53	44.12	30.27	14.6	37.33	44.51	45.4	51.13	32.44	34.18	34.99	29.91	27.53	31.97	45.36	30.08	30.15	44.37	41.69	43.02	27.5	25.63	27.47
ENSG00000050555|LAMC3	0.27	0.12	0.32	0.04	0.1	0.04	0.41	0.08	0.07	0.06	0	0.09	0	0.14	0	0.27	0	0.18	0.14	0	0.07	0	0.06	0.26	0	0.04	0.14	0	0	0.22	0.24	0.07	0.12	0.12	0	0
ENSG00000050628|PTGER3	0.2	0.16	4.86	0.63	3.6	7.48	2.08	1.63	0.35	0	0.77	0.49	0.14	0.63	0.19	0.24	0.12	0.81	0.4	0.55	0.68	0.13	0.15	0.79	0.26	0.07	0.69	0.14	0.22	0.39	0.03	0.14	0.52	0.77	0.04	0.58
ENSG00000050730|TNIP3	0	0.18	0.48	0	0	0.12	0	0.52	0.11	0	0	0	0	0	0.41	0	0	0	0	0	0.84	0	0	0	0	0	0.1	0.56	0.11	0	0	0	0	0	0	0
ENSG00000050748|MAPK9	38.62	31.78	66.71	42	81.43	82.43	67.84	52.13	51.03	33.52	52.62	62.14	46.54	48.53	61.47	39.18	20.11	59.92	38.85	55.44	62.19	36.34	46.13	56.74	39.55	37.22	49.44	35.93	41.76	65.28	42	41.38	56.6	35.97	33.97	50.61
ENSG00000050767|COL23A1	0.1	0.56	0.38	0.42	0.45	0.26	0.82	0.26	0.24	0	0.12	0	0	0	0	0.11	0	0	0	0	0.32	0.22	0	0	0	0.23	0.42	4.72	1.25	0.95	0	0.09	0.29	0.12	0.12	0.21
ENSG00000050820|BCAR1	31.32	24.61	27.07	34.32	26.18	27.59	31.16	21.48	28.12	36.15	24.82	24.4	31.65	28.12	32.56	32.24	25.85	30.93	29.39	25.45	27.02	32.28	25.01	30.2	43.05	32.76	27.89	44.08	35.51	25.84	46.84	34.26	31.7	38.37	29.5	38.11
ENSG00000051009|FAM160A2	27.93	23.54	27.43	29.43	53.17	30.89	37.27	28.18	24.27	32.14	28.58	30.71	28.41	22.35	33.63	41.36	33.45	40.24	39.72	31.59	37	37.31	31.14	32.4	45.68	39.15	35.52	34.59	31.61	32.96	34.26	34.24	34.55	44.07	38.62	32.9
ENSG00000051108|HERPUD1	78.2	126.66	40.5	71.67	79.08	113.11	109.67	102.83	98.78	49.27	62.92	29.51	49.42	43.39	29.95	754.77	512.96	256.75	61.94	58.13	37.24	129.06	74.38	64.41	817.62	840.95	274.86	103.77	101.71	90.71	55.31	64.7	61.98	742.83	787.8	348.31
ENSG00000051128|HOMER3	53.17	43.26	42.72	41.12	32	43.02	52.06	34.96	46.86	71.38	44.92	21.03	63.47	47.73	25.04	64.57	75.34	32.37	63.87	44.2	29.01	72.65	62.24	39.35	76.46	63.95	34.59	83.47	66.43	41.79	79.75	73.49	46.15	102.1	113.12	40.49
ENSG00000051180|RAD51	20.03	28.53	1.08	12.17	2.48	0.74	0.75	4.84	7.95	15.08	5.65	1.71	16.63	5.05	0	9.24	12.84	0.82	15.05	6.61	0.59	21.74	21.55	1.56	7.99	8.92	0.79	26.25	21.35	1.19	26.85	22.13	0	6.54	6.36	1.59
ENSG00000051341|POLQ	14.14	12.19	0.42	14.17	0.81	0.25	0.56	2.69	4.99	7.91	6.25	0.16	9.95	3.18	0.02	8	4.06	1.06	10	5.11	0.56	7.79	9.72	0.09	3.43	8.25	0.1	10.69	8.83	0.4	15.54	17.9	0.16	2.4	4.72	0.49
ENSG00000051382|PIK3CB	14.59	15.04	25.48	13.51	19.94	22.63	19	20.79	15.65	20.74	29.5	53.54	24.17	24.6	48.61	29.3	15.9	21.8	16.49	25.79	53.77	26.3	22.24	21.27	28.18	25.77	20.1	19.24	20.64	16.28	21.77	23.51	17.59	20.41	20.02	13.48
ENSG00000051523|CYBA	12.61	16.17	4.65	21.58	0.28	2.15	3.5	4.9	9.19	8.27	5.7	0.49	8.71	9.84	1.99	6.98	21.38	4.27	9.47	3.53	7.32	11.22	10.53	2.81	4.74	6.6	2.59	3.5	2.66	2.07	6.73	7.37	4.07	5.73	10.24	2.87
ENSG00000051596|THOC3	111.58	112.36	113.89	113.41	86.11	91.31	77.8	82.6	95.59	110.27	88.62	87.27	85.55	74	83.43	53.42	57.48	66.27	100.72	87.63	76.91	92.24	79.51	70.7	68.28	60.83	68.73	78.56	60.04	67.87	68.42	70.25	48.22	48.54	65	60.11
ENSG00000051620|HEBP2	16.92	23.9	11.81	18.56	8.24	26.5	16.86	19.87	15.21	22.93	35.47	9.68	22.15	27.01	18.32	21.19	28.55	50.32	17.89	29.77	18.66	23.11	38.13	56.75	33.05	25.18	58.91	19.24	20.88	41.72	25.45	20.31	46.59	32.84	27.67	46.69
ENSG00000051825|MPHOSPH9	71.6	64.91	36.96	73.57	33.03	33.37	28.96	42.27	36.61	49.63	27.65	32.81	65.24	27.06	31.3	57.13	21.07	23.89	49.93	34.19	22.52	55.29	57.08	25.07	34.97	42.44	35.86	64.01	41.4	25.76	71.99	69.41	37.77	52.76	37.04	29.68
ENSG00000052126|PLEKHA5	71.63	72.18	68.91	85.65	93.58	75.52	89.06	62.85	85.5	47.25	57.83	71.87	42.24	55.72	73.53	55.29	39.31	82.54	53.05	53.2	59.85	52.66	53.28	85.18	54.33	43.75	72.75	26.24	34.94	78.13	31.79	27.14	72.44	38.03	32.7	58.5
ENSG00000052344|PRSS8	1.49	0.48	0.46	3.33	0.62	0.59	1.2	0.34	1.63	0.81	0.21	0	0.51	0.27	0	0	0	0	0.14	0	0.14	0	0.36	0	0	0.57	0.19	1.01	0	0	0	0.48	0.24	0.28	0	0.24
ENSG00000052723|SIKE1	46.43	26.59	36.5	40.97	34.54	34.53	36.21	49.82	25.97	22.53	40.16	39.27	39.21	33.43	33.57	33.26	19.4	42.12	34.25	35.76	48.73	30.5	28.44	36.24	48.21	37.36	40.09	30.59	37.24	51.48	40.83	28.58	41.62	31.08	29.99	36.39
ENSG00000052749|RRP12	18.89	24.14	18.29	22.65	18.2	21.11	19.22	17.09	19	26.41	15.59	18.02	18.08	12.55	17.64	26.48	28.19	36.94	25.39	19.03	20.45	18.07	19.49	28.41	17.16	20.56	29.33	22.4	24.17	21.32	22.31	18.03	17.92	27.17	28.19	21.38
ENSG00000052795|FNIP2	19.19	17.23	32.24	12.63	49.02	35.56	23.02	19.14	23.93	15.33	14.84	19.53	18.73	14.18	15.78	25.55	12.95	34.67	14.33	15.84	17.7	18.2	22.33	25.53	26.78	31.52	27.33	20.31	21.86	37.93	19.82	20.29	35.68	25.87	34.06	36.73
ENSG00000052802|MSMO1	273.07	207.75	277.46	246.93	153.96	295.17	228.81	323.49	200.88	264.01	294.97	243.53	288.54	256.05	221.82	172.02	103.04	168.98	315.41	312.31	267.73	222.51	177.22	193.15	123.35	120.61	164.88	112.04	118.91	115.84	109.83	111.84	97.94	113.76	90.27	146.45
ENSG00000052841|TTC17	92.23	100.28	101.01	92.86	106.13	108.66	93.67	77.15	110.65	79.98	86.59	86.86	79.86	76.16	83.81	126.08	62.3	120.48	102.74	87.29	83.17	95.62	93.9	99.84	137.05	134.13	104.45	86.56	87.77	87.23	112.23	103.09	92.93	120.06	133.32	102.41
ENSG00000052850|ALX4	0.04	0.07	0.28	0	0.28	0.19	0.33	0.29	0.17	0	0.04	0.05	0.04	0.13	0.08	0.12	0	0.32	0.04	0.18	0.08	0	0.07	0.09	0.18	0.12	0.16	0.04	0	0.31	0.21	0.13	0.15	0.09	0	0.15
ENSG00000053108|FSTL4	3.5	7.15	6.36	3.59	9.3	7.44	7.36	5.95	3.63	2.76	2.23	0.13	1.93	1.42	0	3.59	0.39	5.25	4.67	2.13	0.32	3.5	1.67	3.96	5.67	1.17	3.12	4.94	2.09	3.95	3.69	2.31	4.14	0.92	2.56	4.38
ENSG00000053254|FOXN3	42.35	51.13	47.67	47.32	48.43	57.56	47.99	52.83	56.06	50.3	50.23	38.62	55.75	57.09	47.44	91.39	28.51	101.73	52.21	44.14	36.69	58.44	81.21	71.51	77.35	71.96	71.61	60.37	65.86	78.89	70.48	71.45	96.64	78.31	67.71	90.19
ENSG00000053328|METTL24	2.16	1.92	0	0.55	0	0.33	0	0	0.3	0	0.59	0	0	0	0	0.27	0	0	0	0	0.27	0	0.25	0	0	0	0.48	0.58	0	0	0	0	0	0	0	0
ENSG00000053371|AKR7A2	41.37	49.3	25.17	46.14	21.61	25.86	33.68	29.22	36.74	36.02	29.99	25.12	48.51	37.8	24.58	25.99	38.51	18.54	40.91	23.14	22.26	40.26	33.93	20.76	17.91	24.03	20.91	33.94	32.65	22.65	23.89	44.85	16.72	15.83	25.36	23.48
ENSG00000053372|MRTO4	35.69	31.91	28.98	43.13	28.36	33.96	30.72	25.84	28.23	33.33	28.47	36.38	30.41	30.15	34.7	38.51	39.43	42.85	27.88	34.71	44.49	26.57	26.75	36.85	28.13	31.57	52.28	43.12	37.78	39.3	33	29.35	46.56	34.16	27.92	54.11
ENSG00000053438|NNAT	798.98	679.84	2271.78	670.5	4167.13	3424.27	5622.61	3736.8	2289.9	1194.38	1085.49	967.47	1057.78	1034.46	1063.02	757.99	939.99	421.57	1123.32	972.35	941.13	1116.96	1075.53	837.32	591.63	550.4	410.72	1617.54	1288.97	1071.31	1474.36	1235.51	1115.48	673.97	647.61	561.65
ENSG00000053501|USE1	38.1	33.77	41.68	41.7	35.83	30.41	43.11	56.96	40.33	32.01	32.01	26.47	29.51	49.89	30.51	57.13	72.82	59.2	40.48	40.28	33.74	51.25	42.95	35.76	65.59	74.39	65.09	50.07	45.08	47.72	46	53.13	47.36	59.35	80.93	57.18
ENSG00000053524|MCF2L2	0.84	1.94	7.23	1.1	9.23	6.34	4.23	4.55	2.37	1.67	1.54	2.58	0.74	5.62	4.65	6.14	2.88	5.55	4.46	0.89	1.98	1.99	3.06	2.49	2.16	4.98	4.46	2.29	4.5	7.88	1.39	1.28	5.2	3.16	2.12	6.12
ENSG00000053702|NRIP2	2.6	1.85	1.56	2.08	3.26	5.06	3.06	1.61	3.01	2.1	1.93	2.11	1.68	1.55	2.44	3.11	1.29	5.17	2.37	2	1.52	1.85	2.43	2.87	2.97	2.24	5.25	2	2.64	3.3	2.94	3.36	3.61	3.51	3.88	4.51
ENSG00000053747|LAMA3	6.91	4.91	0.84	3	1.5	0.64	1.52	2.4	1.23	12.06	3.57	0.12	7.53	3.26	0.07	9.69	6.52	0	10.79	3.75	0.34	14.22	19.03	0.16	4.8	9.5	0.23	1	1.56	0.2	2.61	3.17	0	1.65	5.14	0
ENSG00000053770|AP5M1	38.25	31.18	53.47	39.8	51.08	40.48	47.14	61.34	42.46	36.32	36.67	38.36	32.75	35.71	34.2	40.08	23.47	43.15	36.77	33.85	33.59	44.36	45.86	39.01	50.87	39.08	34.8	45.85	41.41	40.9	41.11	42.97	39.82	36.19	39.75	48.77
ENSG00000053900|ANAPC4	52.13	39.01	50.51	50.52	53.98	59.01	49.25	52.04	55.76	49.17	64.02	54.83	59.37	52.14	69.25	62.98	47.37	61.75	58.64	42.55	56.16	53.83	57.68	66.65	54.88	49.56	58.67	66.57	66.74	77.05	70.46	80.85	73.23	52.06	50.15	51.32
ENSG00000053918|KCNQ1	0.07	1.17	0	0.46	0.33	1.27	0	0	0	0	0	0	0	0	0	0	0	0	0.24	0	0	0.21	0	0	0	0	0	0.08	0.08	0.14	0	0.22	0.25	0.13	0	0
ENSG00000054116|TRAPPC3	66.43	57.38	146.86	81.5	107.36	104.31	108.94	100.77	92.72	89.6	113.21	110.51	82.5	119.22	109.98	67.29	99.24	108.34	76.27	107.62	127.6	64.92	80.67	171.89	81.13	71.43	113.6	62.05	83.05	112.31	79.14	68.76	129.54	76.48	74.53	112.62
ENSG00000054118|THRAP3	106.72	100.64	98.99	106.46	83.78	86.32	89.17	93.12	99.41	98.93	93.45	94.81	97.85	82.73	79.76	107.6	47.41	89.45	110.26	92.14	94.93	112.49	96.18	88.33	100.93	83.59	89.39	93.73	99.58	88.21	98.93	94.39	82.77	94.1	85.58	89.32
ENSG00000054148|PHPT1	117.93	98	106.43	84.54	89.88	99.27	89.64	83.13	94.41	143.57	108.76	102.83	101.67	110.78	96.02	97.18	160.68	77.75	118.68	125.3	106.31	96.96	91.71	73.56	89.14	141.74	99.52	86.15	87.21	73.11	86.66	97.08	88.29	95.44	109.05	84.7
ENSG00000054179|ENTPD2	1.19	1.53	0.23	2.2	0.62	0.24	0.4	0	0.22	2.91	1.18	1.14	1.83	1.49	2.63	0.8	0.7	2.69	4.3	2.77	0.73	0.6	0.51	0.88	0.89	0.4	0.85	0.45	0	1.44	0.88	0	0.67	0.22	0	0.71
ENSG00000054219|LY75	0.06	0.14	0.19	0.03	0.61	1.24	0.11	0	0.68	0.12	0.14	0.58	0.21	0.11	0.28	0.1	0.03	0.15	0.12	0	0.2	0.27	0.3	0.28	0.19	0.17	0.19	0.25	0.03	0.1	0.24	0.18	0.43	0.08	0.24	0.29
ENSG00000054267|ARID4B	67.1	72.94	71.81	66.22	106.94	83.59	102.43	107.13	76.66	72.46	85.11	57.66	67.13	76	58.03	90.66	48.09	102.8	68.69	68.72	62.81	85.38	71.4	85.3	91.97	74.37	83.35	80.33	85.61	92.87	88.01	76.91	85.45	85.88	70.8	93.7
ENSG00000054277|OPN3	13.38	17.27	5.49	17.46	5.24	7.04	6.31	8.46	7.81	11.87	13.21	4.23	12.64	16.71	5.22	6.22	4.34	7	10.32	18.13	4.87	10.1	8.54	5.25	4.8	4.71	3.7	12.67	7.19	3.72	18.6	8.51	6.43	4.25	4.51	4.56
ENSG00000054282|SDCCAG8	30.2	28.36	20.67	23.4	30.39	23.65	37.11	27.34	35.58	21.7	22.1	16.76	24.69	18.98	19.72	45.02	52.72	26.56	36.29	22.4	15.56	50.39	48.11	29.1	59.85	56.99	21.68	38.22	32.07	42.56	33	36.22	33.88	35	37.14	25.14
ENSG00000054356|PTPRN	4.19	5.12	49.48	4.78	54	56	48.55	24.86	28.3	1.84	19.08	38.69	2.22	16.09	38.5	5.33	4.96	33.83	3.69	13.34	38.46	1.72	7.62	37.26	4.4	2.95	27.29	4.03	7.22	31.07	6.4	9.68	31.86	3.9	3.36	26.75
ENSG00000054392|HHAT	4.62	4.67	0.84	4.93	1.4	1.85	1.87	3.7	2.66	2.79	2.06	0.9	3.37	1.95	1.41	3.47	2.47	0.73	3.61	1.9	0.36	3.11	2.84	0.75	2.09	3.4	0.96	2.12	1.84	0.97	1.77	0.78	0.22	1.73	1.67	0.97
ENSG00000054523|KIF1B	129.48	122.39	199.59	121.58	210.7	196.71	188.58	143.89	183.3	114.69	154.35	182.72	132.85	155.21	177.05	205.06	79.68	175.16	133.92	155.99	191.03	141.53	154.9	148.95	196.91	184.23	150.47	119.51	144.98	152.98	146.44	150.94	168.19	154.46	152.24	157.35
ENSG00000054598|FOXC1	0.48	0.32	0.07	0.18	0	0	0.06	0	0	0.3	0	0	0	0.13	0	0.25	0.05	0	0.06	0	0	0.06	0.06	0	0.42	0.51	0	0.07	0.39	0.18	0.05	0	0.08	0.83	0.6	0.06
ENSG00000054611|TBC1D22A	7.41	7.93	7.4	7.46	8.25	10.08	7.05	9.54	6.68	8.4	7.67	7.38	11.49	8.18	7.21	6.29	8.1	5.22	8.36	9.86	6.69	15.29	6.36	6.19	9.97	6.14	6.1	8.41	8.63	8.91	8.43	8.66	10.28	10.38	12.75	8.52
ENSG00000054654|SYNE2	240.97	212.36	64.66	214.13	62.55	63.41	80.26	78.71	148.6	305.41	142.98	93.99	268.01	159.78	100.96	298.68	205.37	94.72	294.97	172.66	102.05	285.37	243.83	95.01	253.85	280.75	91.27	161.48	145.84	78.11	233.39	213.47	117.47	213.29	300.28	106.67
ENSG00000054690|PLEKHH1	31.42	29.56	25.49	27.24	39.79	42.14	26.3	13.37	32.04	30.14	23.94	13.27	22.59	27.26	26.24	25.02	18.08	23.59	22.3	27.4	17.72	39.87	34.63	22.2	23.02	21.78	23.69	28.16	31.96	30.53	21.72	32.92	35.74	16.69	15.79	25.72
ENSG00000054793|ATP9A	52.15	43.28	204.1	53.57	214.18	194.19	180.71	129.1	130.8	53.25	130.59	168.93	67.55	133.31	159.71	75.51	31.46	173.65	54.12	125.34	167.58	59.86	77.65	148.29	76.26	64.12	167.43	69.56	85.29	158.69	81.74	79.33	179.72	87.67	71.63	176.9
ENSG00000054796|SPO11	0	0	0	0	0	0	0	0	0	0	0	0	0	0	0	0	0	0	0	0	0	0	0	0	0	0	0	0	0	0	0	0	0	0	0	0
ENSG00000054803|CBLN4	0	0	0.56	0.08	0.67	0.77	0	0.29	0	0	0	1.6	0	0	0.78	0.08	0	0	0	0.09	0.64	0	0.15	0.38	0.09	0.25	0.24	0.09	0.08	0.16	0	0.09	0	0.09	0	0
ENSG00000054938|CHRDL2	0	0	0.29	0	0.34	0	0	0	0	0.13	0	0	0.25	0	0	0.49	4.27	0	0	0	0	0.81	0.25	0	1.75	1.93	0	1.03	0.44	0.64	1.57	1.1	0.6	2.85	2.1	4.01
ENSG00000054965|FAM168A	65.04	60.47	116.34	68.29	118.74	104.24	109.33	87.67	97.4	76.67	88.61	98.38	76.93	86.57	93.57	77.05	25.46	86.92	81.63	90.35	103.57	75.85	88.47	75.74	68.81	69.34	81.26	69.78	88.99	82.07	79.36	83.46	96.02	75.19	73.22	85.12
ENSG00000054967|RELT	7.14	8.71	5.63	8.87	7.96	7.03	9.16	3.86	6.51	7.41	6.9	6.05	8.78	7.25	5.58	6.93	5.48	3.54	8.38	7.8	7.41	9.27	10.29	6.6	5.01	6.4	4.29	10.72	6.08	5.35	8.6	9.26	7.5	3.72	5.18	5.9
ENSG00000054983|GALC	19.88	15.92	28.52	18.56	43.46	27.52	33	26.88	24.54	14.91	16.36	20.24	19.56	22.13	20.93	15.12	13.34	23.59	14.61	23.98	20.81	14.6	16.08	15.13	13.86	17.86	15.62	10.8	16.73	22.38	14.92	13.38	19.79	13.16	13.66	12.47
ENSG00000055044|NOP58	141.68	162.53	131.84	131.6	132.96	141.12	112.76	105.77	93.51	123.14	107.09	120.16	125.69	109.18	115.07	141.22	144.59	149.33	130.69	105.07	137.28	116.68	117.84	149.1	147.42	131.52	160.18	128.39	128.93	188.18	126.58	121.57	172.74	148.08	108.8	195.25
ENSG00000055070|SZRD1	85.82	82.62	44.59	89.6	41.79	47.08	65.17	56.68	57.32	85.41	62.5	36.92	73.8	57.77	41.02	87.91	42.19	62.74	87.12	66.84	44.13	84.87	74.56	60.3	70.79	74.49	51.56	104.55	79.52	69.42	94.72	85.38	55.51	81.64	84.05	67.08
ENSG00000055118|KCNH2	19.82	16.02	31.02	13.57	43.11	38.5	41.35	18.08	26.69	13.57	17.03	15.38	13.45	14.54	19.31	7.57	4.35	23.06	12.33	18.48	20.79	6.58	8.57	19.66	6.58	4.93	21.67	6.59	8.47	13.98	8.92	8.82	8.93	6.46	6.41	10.84
ENSG00000055130|CUL1	101.5	97.85	82.27	97.12	76.68	76.79	80.76	84.35	85.53	133.93	96.24	70.33	121.92	85.52	67.24	126.38	98.68	77.02	139.92	87.77	78.3	127	116.78	80.06	117.02	98.08	71.07	63.2	64.13	72.45	67.35	59.15	70.44	91.78	82.05	84.03
ENSG00000055147|FAM114A2	25.96	19.71	21.87	23.46	23.08	32.43	26.66	24.28	31.38	17.76	22.01	18.5	22.27	14.18	14.04	31.24	25.53	30.5	32.45	20.37	14.26	15.9	19.36	15.94	34.31	30.56	25.43	28.34	25.01	31.02	29.6	27.59	27.73	31.97	25.46	37.05
ENSG00000055163|CYFIP2	65.7	64.91	164.79	82.55	147.7	149.3	151.76	137.41	125.02	71.26	129.13	166.14	78.75	138.28	175.07	88.9	60.94	135.26	73.98	135.43	189	91.12	96.93	127.84	71.14	83.24	104.75	69.61	86.78	114.13	82.83	86.04	121.36	66.99	65.36	112.62
ENSG00000055208|TAB2	65.83	77.08	36.58	81.26	52.07	45.74	54.94	57.58	61.8	65.68	63.75	46.92	66.57	63.63	51.51	73.98	59.12	72.16	68.06	59.4	45.06	67.66	68	77.01	67.91	63.98	63.5	75.45	67.82	75.43	68.2	70.74	72.64	57.02	58.24	64.99
ENSG00000055211|GINM1	33.95	35.96	23.22	43.21	30.98	30.8	29.3	25.33	25.85	38.77	27.25	26.01	39.56	28.68	26.28	41.46	42.72	28.73	32.42	28.83	20.98	47	42.68	27.3	44.39	44.59	27.59	51.19	50.75	32.49	54.46	46.06	30.98	47.46	53.67	28.03
ENSG00000055332|EIF2AK2	27.85	29.62	22.07	33.76	15.7	16.1	15.28	21.59	17.24	31.08	18.32	17.41	30.35	21.11	19.61	40.68	13.18	22.57	28.9	24.01	25.82	38.41	36.56	20.25	31.5	35.66	20.08	34.69	37.96	28.51	36.57	40.51	21.4	29.02	29.74	18.47
ENSG00000055483|USP36	24.02	19.49	27.63	20.93	27.27	31.44	27.38	27.52	25.18	29.48	27.83	26.27	20.67	22.4	22.89	43.76	28.29	42.11	26.23	25.02	26.56	26.82	27.97	32.02	43.35	49.46	45.12	41.12	32.02	37.35	32.65	38.11	38	47.07	42.69	45.31
ENSG00000055609|KMT2C	78.42	50.34	64.8	62.01	64.69	63.16	67.81	54.19	71.9	72.6	57.63	74.08	75.6	70.24	76.4	106.54	50.42	93.37	73.14	67.84	67.19	88.9	95.77	81.05	90.99	87.93	81.78	77.38	75.35	81.33	89.53	82.89	91.36	96.03	97.15	80.41
ENSG00000055732|MCOLN3	0.26	0.08	0.21	0.11	0	0	0.19	0.11	0.1	0.09	0	0	0	0	0	0	0	0	0.18	0	0.18	0	0	0.18	0.09	0	0	0.17	0	0.31	0	0	0	0	0	0
ENSG00000055813|CCDC85A	3.37	3.55	22.16	7.59	22.84	17.67	15.11	8.09	10.4	0.23	1.41	8.54	0.74	1.15	8.36	0.24	0.13	2.63	0.97	1.85	7.57	0.37	0.43	2.03	0.34	0.43	3.47	0.38	0.31	1.03	0.05	0.25	0.22	0.26	0.26	1.43
ENSG00000055917|PUM2	113.34	102.68	150.28	116.59	120.56	132.78	141.69	149.03	124.92	107.53	128.76	147.58	119.94	126.64	137.1	131.16	56.2	152.47	109.64	130.43	144.23	104.89	110.47	126.97	116.3	103.16	132.57	111.95	123.14	138.39	115.91	116.29	122.13	107.23	97.94	123.84
ENSG00000055950|MRPL43	51.78	55.65	55.68	60.52	61.79	63.97	69.22	75.92	65.7	61.86	65.99	68.98	55.88	68.94	65.05	53.84	68.23	65.85	49.53	66.24	74.76	71.81	58.94	63.66	56.49	65.57	86.91	59.73	57.32	60.85	58.54	53.25	66.38	73.51	66.42	75.63
ENSG00000055955|ITIH4	4.91	5.91	18.56	3.46	22.91	11.86	5.36	10.75	5.01	5.6	9.3	31.03	2.43	10.84	10.02	9.76	2.63	5.27	3.89	6.84	4.81	2.24	8.4	7.46	6.38	9.47	12.53	4.19	11.55	6.77	6.18	17.5	9.84	11.89	5.72	8.39
ENSG00000055957|ITIH1	0	0	0	0	2.84	0	0	0	0	0	0	0	0	0	0	0	0	0	0	0	0	0	0	0.12	0.1	0	0	0.72	0	0	0	0	0	0	0	0
ENSG00000056050|HPF1	105.82	81.81	84.28	102.59	68.57	80.05	81.31	81.35	80.34	86.56	89.96	79.69	105.76	78.79	75.25	67.12	85.21	69.68	97.97	97.98	84.89	79.56	83.18	74.96	50.57	63.02	78.51	78.42	84.01	71.89	79.8	78.4	68.57	79.54	45.07	92.7
ENSG00000056097|ZFR	114.3	110.82	121.65	112.79	135.8	118.38	108.26	113.45	124.74	103.49	110.45	113.92	109.78	108.11	106.28	115.97	78.02	126.37	109.59	108.87	125.84	106.18	107.13	104.31	111.08	108.79	107.78	112.43	119.9	113.81	97.63	112.92	107.71	96.03	105.58	98.69
ENSG00000056277|ZNF280C	16.41	14.36	9.64	14.58	11.06	10.27	10.07	10.96	11.91	13.14	8.58	9.31	12.88	10.93	9.45	12.34	3.47	9.18	16.15	10.45	9.15	11.54	12.16	10.28	11.45	9.31	11.43	12.48	11.54	10.79	15.37	12.03	13.74	9.78	10.56	9.68
ENSG00000056291|NPFFR2	0	0	0.9	0	0.36	0.21	0	0.31	0	0	0	0	0.27	0	0.14	0.26	0	0	0	0.16	0.14	0	0	0.17	0	0	0	0.14	0.15	0.86	0	0.26	0	0	0	0.27
ENSG00000056487|PHF21B	60.65	57.94	48.54	42.65	51.96	58.86	101.49	65.41	111.01	62.6	103.47	67.13	71.83	92.04	60.82	48.31	37.82	46.2	72.92	96.51	66.17	46.05	48.2	74.08	51.21	34.23	50.78	39.58	43.23	45.84	50.97	47.4	66.38	56.04	45.57	57.76
ENSG00000056558|TRAF1	1.78	1.2	1.11	1.56	1.53	1.24	0.79	0.53	0.9	0.94	0.48	0.22	1.07	0.41	0.62	0.7	0.47	0.59	0.96	0.55	0.54	0.96	1.24	0.53	0.44	0.33	0.32	0.76	0.63	0.68	0.32	0.32	0.33	0.29	0.48	0.12
ENSG00000056586|RC3H2	43.61	34.88	71.98	40.82	55.76	53.86	56.41	62.54	43.16	45.07	57.83	72.26	47.17	52.07	54.94	55.9	16.76	60.11	47.46	55.63	64.74	39.4	45.85	57.32	53.45	44.94	60.32	48.05	57.83	61.54	51.71	51.93	53.98	46.23	42.42	52.04
ENSG00000056736|IL17RB	2.64	3	6.6	3.62	5.11	5.93	6.8	4.58	4.04	3.2	5.06	4	4.05	4.56	4.49	6.14	2.4	6.67	3.17	4.14	3.74	4.73	7.58	3.71	3.74	3.71	4.6	7.1	8.96	6.94	7.6	8	8.67	4.96	4.55	7.27
ENSG00000056972|TRAF3IP2	2.58	7.86	1.38	7.4	4.05	2.37	3.06	3.9	1.01	7.48	3.56	3.28	7.33	4.63	1.94	6.26	5.16	4.61	4.66	4.37	2.91	7.01	8.13	1.92	3.72	9.44	2.52	10.61	12.39	4.87	10.44	10.97	2.12	6.86	4.74	2.86
ENSG00000056998|GYG2	28.17	28.88	12.32	31.38	11.67	15.43	9.51	15.74	15.35	29.79	14.37	6.22	25.35	17.25	4.84	20.85	24.81	4.29	27.37	14.9	5.33	30.85	25.43	5.08	16.91	25.83	5.19	12.74	18.26	3	13.1	21.02	2.8	10.05	17.83	1.65
ENSG00000057019|DCBLD2	59.42	49.3	31.27	47.67	69.28	90.72	67.8	53.2	74.79	41.48	24.18	7.29	43.74	22.19	8.84	30.31	14.87	20.43	46.57	25.13	12.61	38.51	42.18	29.25	31.09	28.28	19.82	47.38	39.27	41.99	34.15	32.59	40.09	33.94	20.72	31.23
ENSG00000057149|SERPINB3	0	0	0	0	0	0	0	0	0	0	0	0	0	0	0	0	0	0	0	0	0	0	0	0	0	0	0	0	0	0	0	0	0	0	0	0
ENSG00000057252|SOAT1	18.49	16.69	7.68	22.51	7.32	6.96	7	14.2	15.13	22.41	12.56	8.64	26.28	14.11	8.03	53.4	25.38	8.41	21.23	16.84	6.97	32.18	33.75	7.66	49.02	63.24	7.57	18.83	22.98	12.12	22.27	27.97	10.45	23.35	31.78	7.69
ENSG00000057294|PKP2	7.03	8.08	1.91	7.62	1.33	1.93	4.2	7.17	3.77	4.88	5.08	0.69	5.56	2.44	0.94	4.37	1.98	3.01	5.79	3.17	1.04	3.48	1.94	2.89	2.39	2.21	2	1.45	1.63	3.77	1.16	0.7	2.32	1.77	1.24	1.74
ENSG00000057468|MSH4	0.21	0.13	0.77	0.36	0.83	0.44	0.15	0.09	0.16	0.28	0.24	0.09	0	0.16	0.07	0.07	0	0.4	0.15	0.33	0.22	0.15	0.2	0.44	0.17	0.08	0.22	0.16	0.16	0.14	0.13	0.24	0.63	0.33	0.16	0.5
ENSG00000057593|F7	0.5	0.44	0.48	0.3	0.15	1.44	0.18	0.2	1.2	0	0.46	0.32	0.11	0.11	0.33	0.1	0.16	1.52	0.45	0.38	1.11	1.24	0	0.5	1.11	0	0.1	0.22	0	2.28	0	0	2.29	0.12	0	0.3
ENSG00000057608|GDI2	329.36	347.38	255.22	405.74	276.45	243.98	281.99	331.08	302.66	313.32	291.9	254.56	305.03	289.29	221.96	276.98	298.81	241.63	337.58	272.87	267.56	291.63	273.44	232.82	308.84	246.9	254.15	242.74	212.59	184.08	253.85	249.15	205.21	272.12	238.51	206.21
ENSG00000057657|PRDM1	0.32	0.13	0.11	0.36	0	0.18	0.21	0.12	0	0.24	0	0.08	0.1	0.05	0	0	0.15	0	1	0	0	0.15	0.05	0.06	0.06	0.05	0.09	11.3	2.59	16.39	0.35	0.23	0.99	0	0.07	0.29
ENSG00000057663|ATG5	24.19	22.01	36.04	28.3	27.46	33.68	26.26	35.25	26.3	24.5	28.8	24.34	32.83	29.67	31.92	26.78	32.25	30.14	27.14	22.25	32.05	27.38	26.55	33.36	26.52	32.95	28.2	27.71	27.95	38.11	26.39	26.18	36.27	27.13	32.36	32.6
ENSG00000057704|TMCC3	0.56	0.6	2.67	0.93	7.56	3.7	2.16	1.68	2.21	1.17	0.08	1.62	1.3	1.48	0.05	0.43	0.12	4.78	0.16	0.18	2.38	0.32	1.02	1.29	1.85	0.57	3.5	2.15	2.66	0.53	1.95	2.22	0.39	1.79	1.27	1.51
ENSG00000057757|PITHD1	73.94	63.9	120.13	57.48	138.86	134.25	98.41	92.39	78.09	60.56	80.15	103.98	61.9	74.11	106.23	77.95	107.49	110.91	60.59	72.43	102.3	75.31	74.83	102.78	72.03	60.14	117.22	73.52	88.95	130.72	64.69	75.84	108.62	71.2	63.39	131.82
ENSG00000057935|MTA3	59.75	82.41	67.47	30.97	58.31	59.6	40.28	46.87	65.15	45.74	33.46	31.61	37.74	37.53	35.42	54.83	41.88	53.34	43.37	42.19	39.06	58.39	66.46	47.27	76.55	48.31	38.58	41.86	46.4	39.76	56.47	45.4	43.07	44.16	60.19	46.35
ENSG00000058056|USP13	13.89	12.04	10.34	12.31	9.34	7.42	8.98	9.03	9.51	11.82	10.78	10.4	15.66	11.43	12.37	20.97	9.15	16.31	11.54	10.44	11.44	19.25	16.88	12.5	15.7	15.46	12.3	21.32	19.35	22.14	23.07	19.82	18.44	26.62	20.08	19.5
ENSG00000058063|ATP11B	39.11	41.27	44.36	38.3	47.04	32.37	38.9	29.09	32.31	27.93	36.47	33.41	33.9	24.37	30.93	44.09	14.75	51.27	34.28	35.47	32.56	35.39	42.09	42.61	38.57	30.26	34.44	48.67	50.36	51.76	46.43	41.27	42.79	41.21	42.05	31.77
ENSG00000058085|LAMC2	0.82	0.5	3.07	0.75	0.59	1.14	4.69	6.24	2.43	1.51	2.89	3.12	2.98	3.93	2.52	7.14	2.91	3.32	2	2.79	3.02	1.7	3.96	4.46	1.69	2.03	1.95	0.17	0.3	2.48	0.61	0.29	2.39	0.99	0.55	2.79
ENSG00000058091|CDK14	26	22.28	33.12	29.83	42.36	40.17	38.79	32.22	27.11	20.29	11.37	9.35	20.91	14.21	9.53	20.47	14.9	14.02	23.61	13.65	10.1	20.08	24.24	13.25	13.21	19.47	13.48	22.57	32.74	9.92	17.84	30.17	9.37	10.82	13.91	8.46
ENSG00000058262|SEC61A1	109.44	86.38	127.3	118.79	107.66	121.33	136.75	142.68	107.54	129.09	146.93	139.62	136.78	154.53	134.29	286.44	193.51	162.82	136.63	152.64	147.41	146.43	151.78	122.89	351.04	337.16	165.33	153.36	157.25	170.2	130.41	124.37	142.52	363.1	382.21	178.67
ENSG00000058272|PPP1R12A	86.78	118.64	107.77	84.66	121.53	84.19	77.8	96.43	85.65	84.99	64.56	89.35	81.36	66.81	69.66	106.59	136.5	94.63	84.41	57.92	84.39	100.61	93.49	102.62	91.71	93.21	92.36	126.84	141.54	123.02	121.36	101.29	106.35	87.61	94.22	78.27
ENSG00000058335|RASGRF1	0.32	0.15	18.59	0.32	25.59	14.55	12.47	4.21	7.96	0	0.12	1.97	0	0.18	2.31	0	0	0.53	0.06	0.98	2.97	0.08	0.03	0.29	0	0.04	2.07	0.12	0.23	1.07	0.07	0.09	0.04	0.35	0	0.14
ENSG00000058404|CAMK2B	1.39	1.78	63.2	0.98	74	60.77	31.06	15.89	19.31	3.21	21.67	46	4.12	22.27	53.46	2.11	4.14	108.32	1.71	14.17	45.25	1.92	6.58	100.66	1.93	3.93	106.78	4.17	3.27	80.56	2.14	3.49	103	5.35	2.61	144.17
ENSG00000058453|CROCC	75.34	76.25	83.01	80.7	105.4	77.59	75.63	48.02	95.31	76.18	63.79	70.36	61.15	71.13	81.12	83.68	44.55	99.51	74.81	86.66	63.6	89.74	80.26	89.6	70.96	78.3	92.79	60.26	81.71	102.86	81.62	92.16	128.07	79.15	88.49	84.6
ENSG00000058600|POLR3E	33.16	31.76	40.93	47.38	35.3	41.29	28.46	35.45	27.03	43.26	34.16	39.5	38.12	34.41	44	57.33	39.93	50.68	38.98	35.92	39.55	32.8	39.15	52.74	60.22	65.68	62.17	49.74	39.91	69.35	44.65	38.22	54.78	59.97	61.3	56
ENSG00000058668|ATP2B4	64.84	81.03	53.17	81.53	27.97	52.76	55.46	67.26	70.3	77.87	77.22	144.2	80.92	90.56	147.87	68.48	48.65	45.44	77.44	72.15	117.2	85.11	87.05	49.23	44.62	53.5	49.54	79.2	74.04	18.56	90.78	97.09	22.56	27.13	39.34	13.64
ENSG00000058673|ZC3H11A	153.2	130.63	141.29	153.52	157.9	149.04	148.61	148.67	158.78	152.79	139.89	150.6	152.87	139.29	160.87	158.5	90.39	158.63	142.94	142.76	163.62	184.93	160.75	174.13	159.16	160.35	150.31	143.05	163.96	173.86	166	168.48	191.28	147.42	140.23	160.92
ENSG00000058729|RIOK2	44.91	27.18	28.17	23.41	21.89	29.81	25.53	23.52	28.71	21.81	18.26	17.94	19.54	19.77	18.5	34.28	32.67	42.89	26	23.42	23.98	20.48	19.81	25.26	39.96	44.81	39.74	31.76	30.33	33.18	24.87	20.51	17.93	26.38	25.34	26.41
ENSG00000058799|YIPF1	35.15	26.05	44.09	34.62	48.1	54.92	47.13	55.29	45.4	35.3	47.2	43.69	37.97	46.93	44.91	28.78	37.41	32.32	36.5	42.74	48.07	28.58	29.53	32.61	30.9	26.15	24.5	23.3	26.25	27.7	20.11	20.67	22.87	22.4	25.81	25.85
ENSG00000058804|NDC1	39.25	33.03	13.18	42.14	13.83	14.19	13.63	20.76	19.91	25.62	18.02	13.33	28.53	20.78	14.94	17.42	17.45	19.07	31.09	23.5	16.2	27.58	26.69	14.91	16.23	20.86	19.03	29.88	28.32	19.25	26.95	30.39	16.06	15.39	16.61	19.92
ENSG00000058866|DGKG	0.07	0.29	5.51	0.08	0.73	3.02	0.97	1.22	0.28	0.04	1.58	0.74	0	0.75	0.88	0.08	0	0.21	0.04	0.26	0.53	0.08	0.07	0.16	0	0	0.15	0	0	0	0	0	0	0	3.43	0.07
ENSG00000059122|FLYWCH1	23.99	22.79	32.63	29.29	39.3	38.32	44.23	26.03	46.04	22.77	37.25	29.63	25.35	26.72	26.91	31.84	15.68	35.99	23.05	30.86	26.37	23.73	22.05	37.81	38.95	23.16	44.41	28.01	26.4	27.34	25.04	22.77	42.25	22.92	24.39	31.63
ENSG00000059145|UNKL	9.46	18.57	8.26	8.03	15.82	9.33	14.88	8.97	11.55	13.56	9.7	14.71	11.42	8.66	9.95	22.87	10.23	15.76	118.69	11.71	9.74	12.36	16.94	11.78	82.43	18.85	18.69	16.87	15.77	21.64	20.13	17.77	17.35	21.28	17.76	19.37
ENSG00000059377|TBXAS1	3.82	1.29	1.49	4.24	2.9	0.24	0.77	2.49	1.19	2.08	0.62	1.84	0.73	0	0	0.55	0	0	3.2	0.17	0	0.84	5.09	0	2.62	0.2	0	0.62	1.15	0.87	0.13	0.58	0	0.68	0.59	0.5
ENSG00000059378|PARP12	1.27	0.41	2.54	1.03	1.03	2.45	0.27	0.23	0	0.46	0.31	0	1.01	0.21	0	4.32	0.97	0.49	0.73	0.22	0	0.88	1.7	0.11	2.48	1	0.09	7.63	4.04	3.25	4.49	3.88	0.49	4.21	4.3	0.37
ENSG00000059573|ALDH18A1	89.92	82.02	49.05	104.54	44.99	49.21	49.86	67.26	71.93	91.82	79.41	45.73	77.82	77.28	44.1	66.84	46.85	58.57	98.42	79.54	54.17	62.59	64.03	53.35	71.36	60.81	48.4	58.52	66.9	50.54	65.45	65.03	51.03	56.62	51.07	52.83
ENSG00000059588|TARBP1	78.02	77.98	141.25	107.99	215.01	209.4	151.96	72.75	121.97	62.13	82.18	184.72	61.55	87.1	217.31	101.65	97.13	90.34	64.27	105.91	197.08	126.26	97.39	79.74	96.93	100.12	101.02	51.57	83.42	56.27	64.76	85.37	71.05	82	77.6	99.95
ENSG00000059691|GATB	16.6	13.41	21.37	17.29	17.26	19.55	19.1	14.71	15.1	17.67	18.97	20.15	17.07	21.86	18.49	15.88	17.72	21.62	18.13	17.76	24.74	19.1	15.92	15.95	13.99	15.49	15.88	48.93	27.62	19.6	15.82	14.68	16.09	9.97	17.31	20.22
ENSG00000059728|MXD1	13.36	21.42	25.68	12.52	26.87	32.4	27.48	24.47	23.55	11.65	15.74	12.74	15.67	13.57	12.04	26.01	8.33	19.03	14.45	16.47	15.3	18.06	16.38	18.4	19.7	19.74	18.42	17.25	19.16	27.43	14.52	13.6	19.68	26.48	24.97	22.82
ENSG00000059758|CDK17	36.75	36.77	79.38	38.61	93.73	76.36	71.15	64.47	61.67	36.26	30.37	44.29	36.95	34.37	57.92	47.55	23.01	36.81	32.16	29.86	48.1	38.44	39.33	27.75	39.94	42.81	29.13	53.79	66.16	40.26	41.84	44.58	33.99	43.77	44.78	32.14
ENSG00000059769|DNAJC25	15.94	17.75	17.75	18.37	22.79	24.33	21.05	17.1	14.9	13.25	14.12	16.43	14.51	13.72	18.53	22.96	15.06	26.95	16.24	15	21.58	17.49	14.36	23.79	28.69	19.11	24.12	17.09	18.94	24.37	13.79	14.17	21.62	24.8	21.38	24.41
ENSG00000059804|SLC2A3	56.83	109.82	51.77	59.3	55.65	45.48	33.81	31.89	49.32	26.58	34.44	27.5	33.7	38.42	29.83	103.44	68.38	32.71	52.06	34.66	36.69	75.78	85.92	43	83.99	122.3	26.29	54.23	70.87	35.66	47.45	71.47	29.87	62.96	78.11	23.92
ENSG00000059915|PSD	14.72	18.01	123.81	11.91	118.7	116.92	90.14	50.06	83.63	14.45	52.82	110.24	17.04	57.86	111.86	17.58	27.22	90.53	13.9	49.44	99.66	14.42	22.48	78.01	19.84	15.69	94.25	15.89	35.36	83.6	32.33	29.37	92.93	27.71	20.88	80.75
ENSG00000060069|CTDP1	19.8	20.2	18.52	20.11	17.15	20.92	22.48	13.39	15.05	15.31	15.6	19.24	18.02	18.25	17.63	20.28	20.94	19.59	18.14	20.16	18.84	17.24	14	17.82	20.38	17.68	21.35	14.56	17.36	21.98	17.07	16.85	16.38	23.17	17.54	20.36
ENSG00000060138|YBX3	33.81	62.25	4.59	50.57	1.89	5.33	7.27	10.52	18.6	40.18	13.68	1.14	27.53	13.64	1.23	75.55	81.2	4.27	23.98	13.1	2.94	40.89	48.33	6.91	84.8	85.86	4.12	44.18	31.92	8.17	34.43	32.9	2.83	79.86	99.44	4.7
ENSG00000060140|STYK1	0	0	2.66	0	0.91	1.46	0.42	0.1	0.92	0	0.26	0.61	0	0.09	0.63	0	0	0.76	0	0.45	0.57	0	0.15	0.48	0	0.17	1.35	0	0	0.47	0	0	0.1	0	0.09	0.16
ENSG00000060237|WNK1	134.03	84.72	78.1	108.76	91.45	111.05	126.87	106.93	80.4	110.24	93	90.97	73.18	82.29	107.25	95.56	36.15	93.95	80.37	77.98	122.81	88.64	138.63	134.11	177.97	112.5	103.85	123.9	86.22	99.29	90.84	98.67	185.32	107.22	115.5	230.78
ENSG00000060339|CCAR1	177.18	160.92	164.28	160.93	164.28	172.6	170.55	163.01	189.12	233.41	174.13	163.64	192.23	173.97	162.18	204.11	224.47	178.12	209.93	176.99	156.37	205.93	191.4	204.68	217.46	206.33	197.47	197.03	189.27	183.07	206.73	193.09	194.16	167.27	162.81	232.99
ENSG00000060491|OGFR	33.76	44.17	39.56	35.52	40.19	36.95	40.52	29.4	44.5	47.72	50.93	47.95	46.49	47.81	42.43	44.71	51.02	55.27	43.95	49.66	42.32	44.86	39.45	55.5	52.84	38.35	52.85	41.23	44.18	48.48	46.25	43.93	55.78	47.5	41.46	52.3
ENSG00000060558|GNA15	0	0.21	0	0.12	0	0	0	0	0	0	0	0	0	0	0	0	0	0	0	0	0.12	0	0.11	0	0	0	0	0.13	0.25	0	0	0	0	0.13	0	0
ENSG00000060566|CREB3L3	0.09	0	0	0	0	0.11	0	0	0	0	0	0.25	0	0	0.09	0	0	0	0	0	0	0.1	0.17	0	0	0	0	0.96	0	0	0.08	0	0	0	0	0
ENSG00000060642|PIGV	3.8	5.89	6.02	5.71	5.2	2.6	4.67	2.68	5.37	3.67	3.14	3.85	4.59	3.45	4.68	5.87	2.77	3.56	3.35	3.09	3.07	6.37	6.41	2.9	5.56	6.5	5.16	4.05	6.34	4.09	3.26	7.09	5.64	4.44	5.25	4.63
ENSG00000060656|PTPRU	11.82	14.29	41.81	10.61	105.08	59.95	34.94	19.59	26.72	2.76	16.98	67.58	1.68	20.61	86.59	2	0.25	11.23	6.95	12.49	42.35	2.31	1.07	5.96	0.47	0.86	9.26	4.52	1.02	2.7	1.51	0.23	0	2.77	0.61	1.5
ENSG00000060688|SNRNP40	91.61	82.28	51.87	83.14	64.96	59.88	53.54	63.06	63.75	80.54	65.66	43.35	80.56	64.22	47.13	72.28	56.41	54.31	94.94	70.33	51.6	80.53	75.16	70.42	66.1	69.18	62.39	76.72	75.74	71.94	73.24	76.07	62.39	69.13	58.11	68.36
ENSG00000060709|RIMBP2	6.09	6.05	20.23	6.94	31.55	21.58	20.47	13.4	22.63	3.01	3.23	16.39	1.02	5.2	12.41	2.73	0.52	21.7	2.82	2.18	5.49	2.48	4.41	19.24	5.68	4.25	23.05	5.44	6.52	41.64	7.44	6.6	46.16	4.53	2.11	24.19
ENSG00000060718|COL11A1	116.88	134.8	5.7	115.96	9.54	7.52	16.57	24.46	53.29	182.27	56.32	5.57	174.49	69.46	2.87	146.4	102.57	5.14	145.18	64.62	11.44	157.71	166.32	12	142.83	178.81	9.37	89.17	64.85	5.54	72.43	71.61	6.16	80.84	105.67	3.54
ENSG00000060749|QSER1	44.49	42.68	28.74	48.29	35.52	30.4	39.67	32.64	38.93	54.61	44.55	19.95	59.09	44.95	21.16	97.42	26.15	50.17	63.33	40.11	30.89	72.88	83.34	57.36	78.29	71.67	46.21	71.56	56.8	52.43	83.49	79.22	76.42	85.79	78.07	52.65
ENSG00000060762|MPC1	51.8	30.73	100.59	54.35	74.69	90.6	80.51	73.83	68.62	58.91	84.6	82.16	58.06	83.23	92.2	59.08	67.15	70.59	45.78	90.11	113.66	65.02	71.16	68.8	67.81	83.29	78.15	65.76	88.37	68.58	70.6	70.08	61.24	75.68	95.84	60.25
ENSG00000060971|ACAA1	54.18	42.32	71.73	48.51	63.91	81.36	57.42	60.65	60.44	55.72	54.6	72.28	60.93	61.92	72.76	57.93	76.88	77.68	65.78	69.18	74.92	68.69	62.05	80.66	62.69	73.87	74.01	55.22	68.51	77.35	66.07	68.9	75.96	66.43	62.04	66.85
ENSG00000060982|BCAT1	33.08	23.17	27.37	19.15	25.94	24.93	22.79	26.62	27.42	6.49	9.62	12.38	10.11	10.24	7.92	37.34	18.21	18.89	6.32	12.71	6.57	10.33	13.8	13.31	31.42	33.23	13.98	5.09	4.36	7.83	8.57	5.45	5.85	29.98	28.47	16.09
ENSG00000061273|HDAC7	50.13	44.77	42.68	41.05	57.92	55.59	54.28	29.97	47.16	41.75	39.97	27.81	39.14	34.82	39.02	49.79	32.37	54.32	55.6	46.93	23.62	39.73	47.78	55.72	50.76	43	64.78	37.76	46.06	46.26	46.47	35.34	66.56	64.93	43.35	65.16
ENSG00000061337|LZTS1	42.29	38.28	33.69	32.58	27.42	32.07	48.99	34.11	42.09	67.55	66.04	59.87	77.08	62.68	59.83	66.76	17.27	68.51	71.13	54.15	52.53	63.23	54.47	61.67	60.11	39.15	64.3	33.54	32.22	48.5	35.1	31.88	47.03	54.64	43.94	52.38
ENSG00000061455|PRDM6	0.14	0.02	1.36	0.16	1.63	1.43	0.07	0.17	0.13	0.21	0.1	0.68	0.03	0.16	0.63	1.13	0.06	0.13	0.07	0.22	0.19	1.17	0.13	0.11	0.08	0.15	0.07	1.64	0.23	0.23	0.04	0.18	1.14	0.16	0.16	0.09
ENSG00000061492|WNT8A	0	0.22	0.83	0	0.7	0.67	0.19	0	0	0	0	0	0	0	0	0	0	0.33	0	0	0	0	0.17	0	0	0	0.89	0	0.52	0.18	0	0	0.23	0	0	0.71
ENSG00000061656|SPAG4	1.8	5.35	7.17	0.25	1.01	2.12	0.79	0.23	2.9	1.72	0.93	0.96	3.48	1.14	1.69	0.53	0	2.55	1.18	2.67	0.57	0.2	0.77	2.03	2.03	0	1.35	2.66	0.43	2.67	4.45	2.33	1.37	2.23	0	4.3
ENSG00000061676|NCKAP1	111.49	108.75	139.12	113.59	117.79	136.28	121.32	133.09	125.47	126.19	177.98	135.65	147.02	173.2	141.61	179.07	109.42	205.44	119.95	161.08	151.37	140.06	162.92	191.52	177.75	186.37	186.38	106.28	131.29	160.98	132.49	138.73	179.46	165.08	163.65	181.18
ENSG00000061794|MRPS35	54.43	50.88	69.89	58.68	65.27	69.63	53.83	68.36	66.64	47.62	56.72	54.29	50.99	51.57	60.19	66.25	80.11	71.44	51.35	46.49	67.81	53.94	60.5	72.34	59.55	66.11	76.98	58.46	61.25	71.46	55.94	57.14	62.89	62.48	63.73	76.17
ENSG00000061918|GUCY1B1	12.58	14.77	53.92	12.93	46.3	38.61	25	23.76	25.25	9.08	13	20.81	10.27	8.43	17.08	4.77	3.7	4.05	8.81	13.78	21.87	9.26	10.61	6.15	3.09	4.27	4.95	6.41	6.12	2.48	6.88	8.61	1.5	2.25	3.35	2.9
ENSG00000061936|SFSWAP	62.25	64.27	65.5	62.11	71.95	72.53	67.06	50.02	68.89	61.3	61.78	53.4	58.92	57.03	57.57	73.95	61.85	76.53	61.35	64.71	58.36	69.78	69.12	80.51	89.79	76.17	83.57	65.97	69.99	82.53	77.33	71.97	102.1	95.42	75.87	100.79
ENSG00000061938|TNK2	36.88	34.52	41.59	36.5	54.47	48.35	54.28	21.7	42.02	32.42	38.14	41.62	36.9	38.26	47.48	34.49	22.72	56.12	29.09	31.66	37.18	44.04	40.75	59.11	40.95	36.57	55.45	85.82	93.7	47.5	130.62	132.42	62.48	38.87	33.02	57.62
ENSG00000061987|MON2	41.79	41.22	51.4	37.24	48.75	43.95	39.93	38.95	42.89	41.27	30.82	33.5	41.67	28.97	40.88	100.44	27.84	45.55	37.69	39.19	37.67	51.76	62.61	30.98	73.69	82.31	51.51	59.42	59.14	33.5	59.45	60.41	43.6	79.79	67.12	46.9
ENSG00000062038|CDH3	3.6	3.08	5.09	2.27	9.82	9.61	8.14	3.5	17.66	1.58	3.93	8.54	0.75	7.78	5.38	2.4	2.05	6.24	1.98	6.33	5.44	0.9	1.78	7.02	3.37	0.95	9.52	0.67	1.68	4.2	0.95	1.18	9.21	1.21	2.43	5.22
ENSG00000062096|ARSF	0.51	0.22	0.76	0.38	0.55	0.94	2.29	5.64	1.28	1.25	1.96	0.16	1.9	1.69	0.13	1.64	2.46	6.8	1.45	2.48	0.39	1.75	3.89	13.63	2.81	1.63	8.48	0.55	1.37	7.62	2.54	0.7	10.84	2.05	1.46	16.87
ENSG00000062194|GPBP1	150.58	153.33	127.01	136.82	139.81	130.99	135.4	142.31	132.28	146.42	141.14	107.89	147.61	120.65	114.71	170.79	169.53	132.16	155.91	131.85	106.7	175.11	167.94	151.52	171.87	165.64	136.8	170.21	167.84	157.68	186.25	184.28	163.47	145.33	147.68	152.35
ENSG00000062282|DGAT2	0.74	2.35	4.8	2.31	2.3	3.6	1.57	3.78	1.56	0.89	1.67	4.08	1.16	3	3.08	1.61	1.07	5.11	1.22	2.63	4.97	1.57	1.44	3.89	0.55	0.36	4.42	0.33	0.11	5.2	1.49	1.04	7.81	0.66	0.5	2.95
ENSG00000062370|ZNF112	23.25	15.72	31.01	19.9	26.07	28.36	26.08	29.87	27.67	18.89	27.67	29.69	22.67	25.59	33.83	28.24	9.05	29.76	22.32	30.63	33.18	20.42	22.43	27.62	28.01	16.46	26.37	22.6	30.94	35.94	30.53	23.65	33.26	25.02	14.74	27.9
ENSG00000062485|CS	176.53	162.94	184.76	193	193.25	181.51	173.39	175.83	178.75	184.85	174.46	165.03	184.35	153.91	164.92	203.43	117.08	196.49	187.27	183.53	192.65	181.46	170.53	181.79	186.98	175.95	185.78	172.52	188.63	177.72	166.06	167.86	161.76	181.88	170.35	190.08
ENSG00000062524|LTK	0	0.14	0.16	0.14	0.2	0.25	0.15	0	0.31	0.08	0.45	0.18	0.15	0.16	0.16	0.54	0.66	0	0	0	0.07	0.15	0.85	0.08	0.08	0.79	0.14	0	0.07	0.31	0.45	0	0	0.16	0.82	0
ENSG00000062582|MRPS24	53.1	64.6	92.56	64.36	56.36	82.88	73.93	75.02	67.33	72.17	87.31	87.4	63.66	103.05	88.02	70.77	92.96	87.36	73.02	99.43	86.47	59.53	70.28	86.39	68.7	58.88	99.82	79.32	64.84	78.8	66.79	67.76	67.34	65.61	66.3	81.93
ENSG00000062598|ELMO2	54.61	50.46	83.15	53.34	72.51	82.27	84.79	71.82	77.27	48.39	72.36	78.65	54.27	75.66	77.55	67.61	53.72	88.67	53.33	65.14	79.5	65.85	68.53	93.83	72.01	67.87	95.54	72.25	79.48	80.89	68.54	66.8	83.23	77.34	79.64	83.81
ENSG00000062650|WAPL	43.58	41.73	27.5	36.11	25.03	28.56	33.39	26.45	31.46	40.46	38.69	26.14	35.05	32.9	24.92	43.96	23.32	35.12	41.82	33.26	27.54	37.43	39.08	33.51	43.37	37.97	29.84	43.92	40.45	38.95	43.97	38.61	35.28	38.65	36.97	34.19
ENSG00000062716|VMP1	45.57	58.36	75	59.16	57.59	66.3	67.27	84.26	58.11	47.92	48.04	73.6	45.93	102	69.19	40.75	31.59	67.14	67.58	50.64	83.83	45.54	62.32	51.5	56.81	53.19	74.1	61.8	57.17	67.08	58.17	48.19	71.91	70.98	47.06	79.94
ENSG00000062725|APPBP2	41.74	39.85	42.44	44.7	38.35	47.87	40.77	39.65	42.74	49.7	37.13	33.18	40.91	36.13	37.83	64.13	23.21	51.06	37.9	43.93	37.49	44.09	67.23	34.61	61.12	45.5	35.29	45.93	50.6	46.1	47.91	52.45	37.5	53.06	44.12	36.13
ENSG00000062822|POLD1	63	49.19	6.92	60.01	8.41	9.11	8.27	7.57	31.08	53.13	16.6	10.48	42.5	21.15	10.73	24.85	27.82	10.48	39.29	20.22	7.68	49.6	33.36	12.94	22.59	17	12.8	30.3	38.27	11.37	33.38	42.03	26.23	12.61	16.62	14.46
ENSG00000063015|SEZ6	31.43	19.75	244.81	14.6	61.9	182.46	64.31	147.15	86.36	131.85	599.27	907.38	201.48	698.44	1008.17	404.49	269.28	550.54	111.17	620.7	948.97	223.49	261.34	522.98	470.49	268.84	557.09	179.88	142.24	404.62	259.49	140.58	583.98	525.53	320.56	655.82
ENSG00000063046|EIF4B	303.28	391.47	218.42	360.35	268.2	236.67	281.39	319.43	322.37	273.98	235.47	311.27	264.27	249.89	348.34	457.06	284.74	420.72	287.94	253.66	271.71	301.18	332.67	310.19	476.32	380.9	413.65	322.44	317.07	276.75	356.46	347.77	296.22	477.13	452.68	395.53
ENSG00000063127|SLC6A16	4.91	3.25	0.1	4.41	0.23	0.2	0.63	1.08	5.87	2.9	1.95	0	2.48	1.15	1.75	3.5	2.3	2.99	2.08	4.34	0.08	6.5	5.03	3.57	3.09	7.24	1.09	2.52	2.09	1.67	2.39	5.3	5.87	6.18	2.22	3.42
ENSG00000063169|BICRA	31.1	24.74	26.78	21.27	28.97	22.77	32.82	14.15	27.11	22.49	32.44	23.55	38.57	11.5	31.44	35.2	11.64	32.45	29.81	40.81	25.39	18.58	21.02	27.97	24.8	25.04	32.33	27.39	35.11	35.69	30.25	28.59	27.43	30.85	32.66	27.83
ENSG00000063176|SPHK2	29.35	25.63	43.86	24.7	24.9	36.42	39.08	37.41	34.72	40.89	41.29	35.02	44.46	38.63	32.61	45.78	22.94	39.61	35.92	41.46	36.13	26.22	31.87	39.88	38.01	31.06	38.31	28.17	31.8	34.53	23.48	24.16	34.69	35.52	34.54	42.33
ENSG00000063177|RPL18	2003.08	2355.49	1189.27	2067.15	1151.7	1219.49	1323.86	1731.74	1918.94	2031.08	1563.07	1500	1761.08	1619.21	1510.69	1594.2	2717.27	1420.39	1888.95	1564.58	1373.24	1498.25	1284.12	1362.79	1763.71	1692.43	1638.29	1625.22	1544.32	1378.1	1482.9	1513.04	1188.28	2025.17	2080.48	1541.32
ENSG00000063180|CA11	34.12	18.44	41.83	20.29	85.45	44.15	74.75	37.47	34.95	15.54	22.78	44.4	15.01	51.04	50.08	28.5	15.89	31.1	11.66	22.04	47.57	8.42	12.16	33.23	33.39	6.56	35.53	6.98	11.73	22	13.83	7.74	59.24	10.62	18.12	29.94
ENSG00000063241|ISOC2	25.76	22.91	20.89	31.3	22.1	27.65	22.9	24.44	28.9	22.78	21.13	16.43	17.59	22.52	19.01	36.03	60.74	13.8	23.58	22.2	18.72	26.44	21.89	15.94	31.31	51.57	22.45	19.65	22.48	24.17	19.48	18.14	21.58	39.94	49.83	19.81
ENSG00000063244|U2AF2	198.93	167.09	157.64	189.6	145.87	147.11	144.95	114.13	150.22	202.64	168.92	127.63	171.82	164.35	143.44	203.54	115.81	177.7	198.55	154.58	160.23	222.95	175	168.99	181.01	173.75	199.54	203.79	183.01	165.02	214.96	205.99	181.05	214.94	191.79	216.72
ENSG00000063245|EPN1	75.86	90.91	114.15	89.74	100.48	98.52	104.92	67.85	89.37	69.79	89.36	109.7	77.34	97.9	107.67	80.25	75.2	87.96	78.39	100.58	100.1	70.63	64.6	77.93	75.33	83.07	88.18	78.57	73.5	80.02	72.77	83.44	81.17	77.18	94.06	89.22
ENSG00000063322|MED29	30.27	31.83	42.82	30.41	49.77	41.38	41.64	25.29	26.02	25.11	27	24.86	28.17	25.22	29.81	31.37	32.53	42.21	27.54	22.42	31.54	34.53	29.29	25.26	42.45	37.6	33.1	36.91	38.6	38.54	37.44	37.66	36.67	28.66	31.78	41.97
ENSG00000063438|AHRR	5.25	1.61	3.27	6.84	2.07	2.2	2.19	2.12	0.95	0.86	0.7	1.01	1.11	1.44	1.2	3.61	1.08	2.69	2.73	3.31	3.17	1.13	1.17	2.62	6.04	4.7	3.12	0.65	1.2	2.86	1.79	2.08	1.75	5.62	2.05	2.36
ENSG00000063515|GSC2	0	0	1.08	0	0	0	0	0	0	0	0	0	0	0.34	0	0	0	0	0	0	0	0	0	0	0	0	0.3	0	0	1.52	0	0	0	0	0	0.3
ENSG00000063587|ZNF275	15.11	12.04	17.48	14.46	18.21	18.19	19.13	16.15	14.08	13.2	13.93	12.67	14.16	14.07	11.81	24.27	6.22	18.26	13.37	15.18	13.47	19.6	18.36	16.68	21.83	22.65	16.83	18.51	21.88	20.99	18.41	15.94	19.01	22.59	22.3	19.7
ENSG00000063601|MTMR1	33.84	23.4	40.21	27.86	39.4	32.58	33.78	34.11	28.67	30.01	36.62	30.87	28.63	37.76	36	31.08	15.9	39.9	29.36	42.79	42.11	27.23	28.86	31.17	33.28	30.85	30.87	34.57	35.93	38.48	31.84	33.24	28.57	26.59	28.32	41.67
ENSG00000063660|GPC1	186.27	201.42	111.04	255.55	109.12	107.23	108.48	63.35	143.06	225.19	148.31	130.65	217.46	154.31	139.51	155.61	107.22	121.64	247.72	181.6	122.7	201.34	169.2	127.17	131.07	143.82	124.42	112.85	94.81	98.01	132.19	118.19	128.25	120.76	105.9	120.21
ENSG00000063761|ADCK1	11.45	8.63	17.09	13.34	12.62	13.93	13.44	13.49	17.19	9.47	10.1	11.87	10.32	10.08	10.37	12.11	9.68	14.36	11.51	15.44	10.49	10.09	10	10.99	14.61	11.71	14.99	9.64	5.88	12.78	7.46	9.2	10.25	8.18	10.64	13.81
ENSG00000063854|HAGH	43.21	36.75	72.33	43.23	59.96	72.69	65.24	63.34	47.81	60.61	63.5	70.9	52.63	65.21	55.13	32.44	50.43	44.65	42.41	55.13	76.93	35.17	39.5	50.36	39.35	56.28	51.79	40.9	48.98	56.07	41.48	54.45	47.28	42.61	53.06	42.01
ENSG00000063978|RNF4	46.25	42.99	73.05	67.04	41.97	55.99	63.42	64.73	56.6	58.88	56.66	59.58	50.55	54.45	58.03	70.24	42.14	62.24	59.67	54.27	45.21	56.65	77.46	59.91	71.02	62.32	67.5	88.35	63.67	59.75	72.73	63.1	49.8	57.23	63.92	70.75
ENSG00000064012|CASP8	0.67	9.32	4.43	1.75	4.09	2.32	2.09	1.93	2.81	1.79	2.23	2.07	2.09	1.92	2.6	3.25	1.36	4.49	0.91	2.25	3.43	1.4	1.44	2.72	3.16	5.1	2.73	2.5	2.24	3.38	2.23	1.7	1.89	2.89	2.44	2.55
ENSG00000064042|LIMCH1	34.05	35.67	24.5	26.22	22.27	22.08	20.14	28.6	37.31	29.69	67.1	47.67	34.69	73.25	73.96	55.19	35.59	156.83	21.34	47.14	39.17	35.25	35.77	113.07	59.89	57.24	132.62	18.84	16.89	27.15	8.47	8.88	26.16	29.52	42.07	79.27
ENSG00000064102|INTS13	28.19	31.25	28.32	23.6	24.56	20.82	25.27	25.76	23.5	26.73	23.46	17.13	19.88	24.83	20.27	22.46	23.45	21.34	23.26	24.06	25.3	27.03	29.9	31.73	19.82	25.18	29.31	19.1	27.79	32.37	31.62	22.43	30.52	19.04	17.53	24.76
ENSG00000064115|TM7SF3	43	48.5	48.81	49.82	45.31	40.47	44.48	45.29	67.5	43.18	33.31	43.9	75.49	54.7	45.03	28.75	19.32	24.34	42.85	40.01	44.73	44.15	76.59	39.83	56.26	33.17	37.17	37.66	42.44	39.35	51.1	44.83	35.28	36.48	26.25	29.88
ENSG00000064195|DLX3	0.09	0	0	0.09	0	0.11	0.49	0	0	0.09	0	0	0.1	0	0	0	0	0	0	0	0.19	0	0	0	0	0	0	0.1	0.1	0.42	0	0	0	0.49	0	0
ENSG00000064199|SPA17	36.01	35.83	14.47	44.8	9.41	11.11	6.46	11.96	20.87	23.63	8.69	5.1	26.39	11.46	2.23	8.25	10.51	5.14	24.29	13.2	5.74	17.8	21.03	2.51	10.18	11.82	5.29	15.62	14.8	7.32	19.48	19.9	3.1	8.86	10.25	2.4
ENSG00000064201|TSPAN32	0.35	0.26	0.42	0.35	0.43	0.09	0.3	0.26	0.31	0.58	0.85	2.76	0.6	0.47	0.28	1.22	0.23	0.97	0.44	0.43	0.14	0.72	0.46	0.43	1.05	0.45	0.49	0.31	0	0.36	0.39	2.07	1.06	0.32	0.33	0.59
ENSG00000064205|WISP2	0	0.26	0.56	0.49	0.95	0.54	0	0.11	0.23	0	0.22	0.5	0	0	0.26	0.56	1.07	0	0	0.6	0.44	0.12	0.18	0	0.14	0	0.18	0.63	0.09	0	0	0.13	0.11	0.1	1.07	0.09
ENSG00000064218|DMRT3	29.53	37.96	2.31	39.65	3.1	2.11	14.33	11.92	9.14	12.2	9.86	3.48	9.01	5.56	3.06	1.63	2.56	0.16	12.85	7.44	3.84	3.02	1.37	0.14	1.47	2.19	0.11	0.5	0.25	0.23	0.41	0.5	0	0.66	0.63	0
ENSG00000064225|ST3GAL6	20.62	13.86	8.25	12.61	5.74	14.45	18.21	15.17	11.96	16.53	14.65	6.48	20.79	14.17	6.24	17.65	15.64	44.06	18.87	18.75	6.19	22.72	39.01	109.12	17.07	16.66	46.06	9.26	14.16	120.45	18.07	14.22	154.62	22.57	12.36	99.71
ENSG00000064270|ATP2C2	1.32	2.99	5.44	0.62	1.2	4.39	3.64	0.62	1.12	0.18	0.9	2.23	0	2.14	0.98	1.13	0.1	8.46	0.38	0.87	1.14	3.69	1.29	2.57	12.15	1.06	2.49	4.75	1.73	1.9	1.08	3.1	2.27	0	7.5	12.98
ENSG00000064300|NGFR	4.12	5.17	8.64	0.61	5.3	10.54	8.33	9.66	5.62	0.61	2.65	19.69	0.44	1.4	12.2	0.07	0.32	2.26	0.07	2.35	31.78	0.15	0.32	1.24	0.33	0.31	1.23	14.14	2.88	3.4	0.19	0	0	0.78	0.23	0.95
ENSG00000064309|CDON	178.58	232.14	68.2	170.23	32.73	59.49	38.04	63.72	55.46	201.83	96.24	72.26	193.51	104.41	70.22	187.47	32.13	66.94	230.41	112.12	75.4	140.34	124.55	39.13	125.99	117.73	43.09	75.17	44.14	42.57	84.9	60.08	45.36	102.23	94.51	45.24
ENSG00000064313|TAF2	41.89	31.19	43.04	32.38	36.13	35.44	29.77	35.02	35.85	33.91	34.9	29.8	31.26	31.39	32.52	47.26	18.81	46.54	37.84	29.72	35.63	29.87	31.76	39.26	44.27	36.14	37.9	43.91	39.75	37.37	36.7	31.83	48.32	39.75	36.03	37.82
ENSG00000064393|HIPK2	42.35	39.52	24.99	51.71	29.25	26.76	35.38	19.56	40.91	30.07	19.52	10.24	30.73	18.6	9.23	45.6	13.33	16.3	35.16	23.02	10.92	31.57	35.17	16.51	42.08	44.77	13.89	42.97	38.57	18.11	42.14	42.16	20.27	37.09	43.75	17.48
ENSG00000064419|TNPO3	58.5	43.23	61.19	56.68	63.2	60.7	57.21	62.91	56.57	47.21	55.95	62.84	53.85	57.19	54.98	55.44	31.02	64.46	52.68	61.02	63.6	56.19	55.46	52.35	50.72	54.72	59.22	62.88	66.01	51.77	65.41	67.28	57.45	50.35	54.41	59.37
ENSG00000064489|BORCS8-MEF2B	7.16	7.89	1.9	4.12	6.31	5.49	4.33	2.73	3.69	12.48	0.84	0	11.19	2.2	2.97	9.08	13.22	1.12	9.28	5.29	1.23	10.85	4.26	2.16	8.06	9.75	4.43	7.24	9.94	1.51	7.9	8.77	2.02	4.81	12.6	5.14
ENSG00000064490|RFXANK	67.25	97.21	29.54	77.71	46.69	43.37	61.92	54.52	66.1	79.93	40.62	59.32	53.59	60.2	37.17	85.58	129.15	30.26	112	79.24	51.93	108.59	91.14	52.06	93.46	88.77	31.4	99.95	59.63	26.51	99.67	50.52	31.16	84.33	85.6	22.98
ENSG00000064545|TMEM161A	24.57	24.06	13.44	31.66	18.55	12.44	14.69	10.07	16.16	16.84	18.39	22.65	20.94	11.26	27.6	12.37	24.16	16.33	28.77	15.69	25.7	21.79	18.39	19.25	13.63	16.95	18.8	22.56	18.08	15.36	22.23	15.88	12.95	15.37	20.59	17.08
ENSG00000064547|LPAR2	126.18	114.33	103.96	121.4	113.19	134.08	127.52	76.05	153.48	194.83	148.26	117.23	213.97	158.75	120.1	214.12	187.2	126.41	185.77	160	108.22	177.12	195	177.04	198.92	189.84	147.34	118.15	95.93	115.16	151.02	158.67	169.46	198.9	140.58	172.69
ENSG00000064601|CTSA	28.53	33.14	46.43	45.17	45.23	40.79	34.43	33.98	50.93	49.98	37.74	32.77	39.73	35.77	31.44	47.45	42.92	39.33	49.2	37.99	25.69	54.12	54.14	34.05	48.77	64.95	31.7	53.7	54.94	23.81	48.45	41.45	36.6	49.05	74.54	30.34
ENSG00000064607|SUGP2	124.24	102.18	184.07	125.9	196.54	190.69	186	135.66	197.31	141.14	157.56	175.52	132.7	141.87	170.19	142.58	127.42	166.8	129.37	179.4	182.62	167.24	169.48	168.14	118.1	131.09	169.12	157.64	146.95	162.06	163.95	175.26	185.8	120.02	115.52	181.33
ENSG00000064651|SLC12A2	27.08	21.47	16.41	18.31	21.09	20.91	15.39	14.96	22.62	21.13	16.52	8.21	27.56	18.32	10.69	29.16	12.13	20.57	19.64	25.27	20.42	29.15	28.01	17.01	23.17	25.68	13.7	22.2	21.88	30.99	14.38	24.84	21.11	15.15	24.21	11.71
ENSG00000064652|SNX24	15.51	14.17	7.45	15.81	16.15	10.4	8.56	16.26	10.03	13.19	10.46	8.82	13.1	12.38	8.34	22.62	15.29	17.39	13.52	10.61	12.47	17.36	15.62	8.44	17.08	18.3	10.05	19.25	18.08	12.64	16.73	11.14	11.03	21.86	15.97	10.42
ENSG00000064655|EYA2	19.06	21.39	6.67	26.21	3.76	4.77	10.67	16.65	10.52	6.82	1.44	0.89	1.19	0.61	0.1	0.1	0.4	0	10.19	1.29	0.52	0.65	0.95	0	0.36	0.22	0	7.89	4.42	2.76	5.03	4.92	0	0.4	1.24	0
ENSG00000064666|CNN2	143.22	132.75	80.93	176.55	84.93	128.93	182.41	152.68	180.04	142.91	218.49	97.68	190.46	176.91	112.35	201.41	132.55	207.47	164.57	206.65	93.63	188.27	166.55	199.09	207.92	163.93	189.16	123.29	132.17	208.53	142.67	123.57	276.14	215.91	151.72	196.04
ENSG00000064687|ABCA7	14.58	19.25	40.11	16.52	28.91	43.99	28.49	17.97	27.39	10.3	22.67	41.5	8.24	22.17	36.49	9.25	8.42	20.38	12.32	22.33	49.82	16.19	6.84	31.17	9.24	8.55	32.85	10.24	12.22	25.48	12.08	10	21.17	7.08	6.22	21
ENSG00000064692|SNCAIP	76.02	67.67	52.04	89.69	30.5	38.83	72.44	115.78	69.63	110.29	72.39	20.75	120.95	82.51	23.73	175.32	86.34	68.66	130.71	112.41	38.52	123.11	92.93	56.66	122.6	95.03	89.83	168.57	153.34	71.16	201.82	181.9	100.61	138.98	115.2	89.9
ENSG00000064703|DDX20	20.94	19.17	22.54	21.12	21.78	27.89	24.22	23.23	23.15	19.18	19.41	23.42	18.01	21.57	16.99	22.46	16.58	22.53	24.6	18.52	17.34	16.6	18.16	22.81	21.56	20.89	25.87	23.98	23.81	30.01	20.4	18.22	20.88	22.03	23.45	27.52
ENSG00000064726|BTBD1	54.89	47.08	106.1	52.44	96.93	91.58	75.72	68.46	75.8	53.84	70.95	86.26	58.86	75.41	101.22	77.01	58.62	87.65	54.63	72.66	88.45	70.29	69.88	85.49	75.31	75.81	82.98	76.03	73.48	69.45	74.53	77.26	62.09	70.19	90.42	72.64
ENSG00000064763|FAR2	3.51	4.59	7.96	7.16	13.45	8.01	8.06	4.52	2.71	7.01	4.48	7.62	3.3	7.39	7.36	4.82	4.06	13.87	5.55	3.02	7.69	9.13	6.62	8.67	3.15	3.88	14.04	6.93	11.61	8.4	3.46	5.02	16.44	3.54	7.67	10.3
ENSG00000064787|BCAS1	0.08	0	0	0.11	0.17	0	0.15	0.18	0.17	0	0.09	0	0.17	0	0.22	0.16	0.09	0.06	0.17	0.09	0.08	0.16	0.28	0.1	0	0.39	0.16	0.17	2.01	0.08	0.21	1.91	0	0.18	0.26	0.11
ENSG00000064835|POU1F1	0	0	0	0	0	0	0	0	0	0	0	0	0	0	0	0	0	0	0.19	0	0.19	0	0	0	0	0.19	0.18	0.28	0	0	0	0	0.23	0	0	0
ENSG00000064886|CHI3L2	0	0	0	0	0	0	0	0	0	0	0	0	0	0	0	0	0	0	0	0	0	0	0	0	0	0	0	0	0.2	0	0	0	0	0	0	0.38
ENSG00000064932|SBNO2	9.27	10.49	8.84	9.18	6.85	6.64	7.1	5.14	9.42	12.5	10.3	10.57	12.56	10.26	14.04	15.13	9.03	13.37	12.68	10.49	10.47	13.19	9.77	12.97	14.59	16.83	16.63	13.51	10.51	13.41	16.73	12.53	12.59	16.23	16.03	16.52
ENSG00000064933|PMS1	43.85	37.02	29.88	51.28	40.28	37.71	29	26.14	40.02	45.25	33.32	23.9	42.21	25.6	22.39	46.68	50.35	34.78	41.08	30.07	34.29	42.96	54.32	27.5	45.13	46.57	39.39	41.07	47.92	31.52	39.43	43.51	37.24	56.57	44.51	36.63
ENSG00000064961|HMG20B	99.65	92.34	26.45	118.45	19.76	30.51	36.83	54.43	47.77	99.82	76.24	41.33	108.07	75.09	33.34	95.01	106.49	35.38	96.01	93.71	32.78	121.41	103.22	59.05	104.66	105.37	50.01	122.8	99.51	54.33	112.91	105.98	66.59	115.96	104.09	47.72
ENSG00000064989|CALCRL	0.3	2.52	1.29	1.28	3.71	0.81	0.19	0.88	0.98	0.38	1.22	0.67	0.14	0.05	0.66	2.51	0.14	2.13	0.65	0.05	0.53	0.14	0.16	0.77	0.46	2.41	0	1.92	3.15	1.06	0.64	3.74	1.4	0.29	0.59	0.53
ENSG00000064995|TAF11	51.39	42.41	64.33	36.77	69	58.02	47.25	51.2	53.35	60.4	55.47	51.67	53.52	56.85	54.3	48.54	57.7	48.08	56.75	57.99	54.65	51.78	57.45	59.33	48.7	44.91	56.01	65.23	63.81	70.4	58.3	53.91	64.07	63.48	53.52	70.98
ENSG00000064999|ANKS1A	41.38	36.86	62.31	33.25	104.98	93	129	58.97	65.96	30.08	30.92	28.36	33.37	27.38	26.48	19.06	9.84	26.21	33.53	31.51	30.38	17.71	18.89	23.44	19.29	15.85	24.91	15.42	15.28	23.92	15.67	16.02	24.8	15.81	13.01	23.47
ENSG00000065000|AP3D1	90.3	83.05	97.64	92.08	85.34	71.8	93.06	55.44	87.68	82.3	90.35	75.18	83.16	88.87	78.04	94.27	79.34	96.62	97.56	75.25	79.94	79.78	79.15	73.95	117.69	125.32	102.64	83.78	72.93	90.52	78.91	85.52	73.41	117.18	123.65	99.99
ENSG00000065029|ZNF76	32.72	38.38	24.67	36.07	36.79	34.56	31.94	22.73	35.24	34.26	24.2	24.11	30.98	25.01	23.02	31.9	19.92	18.87	33.84	23.9	19.23	38.87	37.29	29.67	27.13	32.61	26.01	34.07	28.3	34.38	36.45	37.84	35.28	32.48	29.88	26.15
ENSG00000065054|SLC9A3R2	3.37	7.14	15.04	4.24	13.07	7.67	6.76	5.16	6.24	4.05	4.11	8.02	4.1	4.21	6.85	4.26	3.59	5.84	1.57	3.35	3.87	4.27	2.81	7.81	3.28	2.62	5.4	1.85	1.83	6.58	2.54	4.55	9.6	3.28	4.07	3.38
ENSG00000065057|NTHL1	21.25	15.81	17.7	25.4	20.67	24.12	11.88	18.45	17.89	22.74	18.26	13.7	17.39	18.03	21.95	12.38	25.67	19.74	23.03	18.67	21.93	15.56	13.65	24.29	8.66	25.74	18.67	10.32	13.37	17.63	21.35	19.23	18.9	7.02	12.95	20.05
ENSG00000065060|UHRF1BP1	14.98	14.83	11.06	15.02	15.62	12.82	13.31	11.11	13.55	11.37	7.62	5.59	12.75	7.86	6.28	26.55	11.84	15.94	13.94	8.76	7.11	14.4	15.24	12.74	25.44	24.8	14.27	17.93	16.26	10.47	15.94	18.16	10.05	19.91	20.76	15.01
ENSG00000065135|GNAI3	11.54	10.22	10.17	10.32	10.7	11.51	11.58	13.6	12.18	10.82	12.86	10.83	12.11	13.01	10.7	10.96	10.44	10.18	11.23	12.22	11.23	10.99	12.01	11.67	9.92	10.63	9.91	12.53	13.04	11.82	11.94	12.06	12.2	10.05	10.07	11.25
ENSG00000065150|IPO5	203.48	209.45	107.21	230.58	102.62	108.07	103.56	125.36	159.98	178.14	141.91	118.19	173.83	148.44	123.21	166.92	88.61	139.65	188.93	150.9	121.4	156.86	156.84	122.34	142.74	150.88	134.37	164.06	161.46	132.86	177.37	181.75	128.99	139.51	139.19	134.35
ENSG00000065154|OAT	38.93	53.79	55.24	41.39	64.07	54.07	39.47	39.02	39.75	48.65	34.29	40.3	51.44	40.72	32.62	85.91	81.16	49.78	42.98	45.99	40.3	95.47	78.58	51.74	67.19	77.48	52.49	70.89	85.29	74.7	59.5	63.22	47.84	52.59	57.29	51.35
ENSG00000065183|WDR3	24.26	20.91	27.35	28.24	23.35	25.96	27.13	29.66	22.21	18.99	24.66	28.11	16.7	21.34	22.63	51.05	12.45	28.86	23.66	22.43	23	19.34	21.05	20.4	30.24	19.31	28.86	25.7	28.58	30.95	30.06	26.91	27.67	27.36	21.68	26.64
ENSG00000065243|PKN2	63.2	53.92	32.34	78.21	48.86	34.4	48.54	38.85	37.56	62.48	38.13	42.98	71.52	37.46	31.94	63.17	30.63	30.56	50.68	55.54	36.68	52.49	65.37	35.62	55.85	73.1	40.99	81.01	79.09	48.08	74.65	93.67	55.67	55.72	65.42	34.17
ENSG00000065268|WDR18	52.09	62.81	41.35	56.94	41.59	38.61	45.7	34.63	45.4	55.57	38.87	37.55	56.46	55.38	34.06	41.62	59.51	37.57	56.41	45.36	37.92	46.07	39.93	41.7	50.78	50.04	43.61	46.38	37.29	45.71	44.24	47.54	40.87	68.18	50.83	43.95
ENSG00000065308|TRAM2	7.36	6.6	2.86	10.44	4.47	3.64	5.23	3.97	4.69	4.17	4.37	3.64	4.66	4.58	5.61	5.44	3.04	2.26	3.98	4.48	2.68	5.27	6.59	3.1	4.3	4.35	1.96	9.01	7.76	4.35	6.62	7.2	2.69	3.27	3.24	1.37
ENSG00000065320|NTN1	3.29	2.69	1.74	1.18	2.7	2.27	1.67	0.87	4.91	1.52	0.91	1.63	1.25	0.62	1.54	0.46	0.55	0.36	1.37	0.6	1.65	1.27	2.51	0.91	0.52	0.72	0.26	4.9	6.69	1.41	1.95	3.55	0.38	0.47	0.58	0.26
ENSG00000065325|GLP2R	0	0.04	0	0.05	0	0	0	0	0.06	0	0	0	0	0	0	0	0	0	0	0	0	0	0	0	0	0	0.05	0	0	0.4	0	0	0	0	0	0
ENSG00000065328|MCM10	28.87	25.12	1.94	28.87	0.64	3.33	6.94	6.68	17.58	21.48	8.13	0.64	21.46	7.04	1.42	13.21	7.92	0.49	28.83	9.19	0.69	25.66	20.28	3.4	16.57	12.86	0.5	32.02	18.42	0.59	31.02	27.97	0.38	3.25	6.47	1.16
ENSG00000065357|DGKA	7.87	16.38	21.78	11.44	21.82	19.64	14.6	21.1	45.64	22.68	19.09	14.19	26.33	36.82	22.73	22.89	21.51	41.95	15.59	19.07	22.61	32.72	26.74	25.25	20.05	29.76	26.64	15.98	20.58	78.32	23.83	55.58	48.89	22.98	17.8	28.89
ENSG00000065361|ERBB3	4.7	3.77	2.59	0.07	0.5	1.06	0.08	0.54	1.08	0.35	0.08	2.53	0.09	1.48	0.34	0.22	0.06	0.34	0	0.08	0.05	0.23	0.05	11.97	0.93	0.31	1.02	1.35	1.02	1.19	1.24	1.18	1.63	0.35	0	1.07
ENSG00000065371|ROPN1	0.16	0.29	0.2	0.17	0.47	0.79	0.19	0	0.41	1.1	0	1.12	0	0	0.16	0	0	0.28	0.45	0	0.17	0	0.64	0.65	0	0	0.57	0	0	0.73	0.42	0	0.75	0.45	0	0.16
ENSG00000065413|ANKRD44	14.52	18.35	40.8	25.72	24.48	44.53	32.64	40.34	24.32	14.18	30.13	53.73	23.15	25.69	48.07	56.36	11.4	32.4	23.58	34.37	43.27	23.04	26.3	24.55	29.85	21.97	28.7	13.46	23.36	32.66	20.65	17.38	22	31.88	22.53	36.99
ENSG00000065427|KARS	122.26	114.34	142.29	124.5	108.36	128.95	114.58	135.14	109.66	114.82	130.37	139.66	105.73	127.88	132.79	108.28	117.69	133.56	113.35	124.48	134.63	109.48	100.34	116.94	104.41	97.9	130.63	113.26	100.39	106.06	101.76	100.13	94.79	115.45	107.9	136.15
ENSG00000065457|ADAT1	46.66	34.54	77.16	35.96	86.31	62.91	63.9	49.14	50.86	26.3	46.55	47.88	41.45	46	46.3	48.66	16.47	52.37	38.09	37.04	48.04	48.91	45.14	39.5	43.81	33.15	48.19	36.04	50.03	58.13	43.86	45.43	46.32	49.19	39.64	56.89
ENSG00000065485|PDIA5	9.5	9.63	4.85	9.92	7.38	7.68	3.64	10.15	7.04	9.99	5.16	6.67	15.15	6.23	3.27	15.51	6.72	7.19	9.38	4.3	3.84	7.83	8.24	2.48	21.73	22.6	11.71	5.77	10.99	8.49	13.27	8.2	2.85	12.85	18.88	8.74
ENSG00000065491|TBC1D22B	9.92	10.89	15.26	13.07	16.83	17.28	17.75	14.07	13.92	12.8	15.95	17.34	12.78	13.46	14.71	20.57	10.05	11.69	11.61	13.97	14.75	17.92	15.85	12.51	20.39	18.41	11.8	14.3	16.64	18.07	14.18	11.26	15.28	15.77	14.43	15.32
ENSG00000065518|NDUFB4	299.83	239.4	392.21	311.85	232.84	309.5	337.29	389.31	311.53	258.96	317.1	397.19	241.33	391.34	342.16	211.96	220.29	322.52	274.38	331.97	326.86	295.01	250.02	260.01	277.37	224.29	304.19	183.47	186.18	243.15	299.66	272.8	259.76	253.74	286.06	255.83
ENSG00000065526|SPEN	68.6	62.75	67.13	64.94	60.94	52.56	66.04	43.86	66.29	58.04	51.55	44.9	58.48	55.14	44.45	83.63	26.2	80.85	71.31	70.86	49.68	63.03	81.49	65.75	71.93	75.52	54.81	87.85	84.92	68.18	111.25	101.44	87	82.91	80.73	73.17
ENSG00000065534|MYLK	2.63	2.62	0.77	3.45	1.21	1.61	0.47	0.79	1.49	1.57	0.63	0.69	1.07	0.4	1.78	1.34	0.24	0.62	1.34	0.68	2.73	3.85	1.02	0.77	0.55	1.93	0.51	2.04	1.51	2.28	1.16	1.12	1.36	1.97	0.88	0.88
ENSG00000065548|ZC3H15	92.71	110.44	126.83	101.75	115.6	132.24	110.38	131.18	116.15	101.46	120.27	122.34	103.69	110.58	124.83	136.44	134.73	145.54	101.01	105.95	125.26	102.58	111.62	141.6	140.94	132.83	161.79	112.62	116.4	151.5	114.58	106.66	122.21	139.93	127.06	156.27
ENSG00000065559|MAP2K4	38.27	40.13	58.92	36.83	68.32	60.81	48.8	56.34	47.72	33.91	43.01	54.82	38.96	39.58	58.72	40.63	27.25	49	35.61	42.04	55.71	36.93	31.65	52.73	37.85	35.29	46.3	43.76	37.56	45.68	37.36	32.96	42.06	38.6	35.77	44.7
ENSG00000065600|TMEM206	25.23	29.98	22.34	33.01	24.94	29.14	26.67	28.32	35.18	31.1	40.79	43.39	40.77	39.11	31.64	36.45	43.1	47.82	29.69	38.92	36.19	38.74	37.35	43.44	36.18	39.9	48.42	31.11	28.42	31.45	36.62	38.13	35.97	31.71	28.74	35.61
ENSG00000065609|SNAP91	43.47	26.4	145.85	35.32	135.61	128.43	113.82	73.84	80.81	40.02	77.26	119.59	45.77	91.43	131.23	54.25	39.41	93.43	36.53	79.58	144.37	37.94	41.21	75.45	54.11	44.44	89.37	27.28	49.84	77.88	37.47	34.94	74.1	44.72	45.04	67.67
ENSG00000065613|SLK	30.26	29.25	36.53	34.82	30.47	30.24	28.45	23.35	30.16	29.21	27.28	46.45	30.73	26.64	47.42	35.21	21.13	28.42	27.46	25.03	44.38	31.72	36.8	27.91	31.35	30.89	23.09	31.34	28.75	24.64	29.02	30.15	20.16	25.61	30.64	19.7
ENSG00000065615|CYB5R4	19.29	10.39	13.95	7.69	12.71	13.17	7.73	9.16	8.12	11.73	11.84	10.85	14.21	10.64	15.29	15.48	5.69	10.95	12.18	9.18	13.52	8.21	9.64	9.81	9.35	12.77	9.75	16.97	13.5	11.35	9.87	9.21	11.29	9.04	8.82	12.07
ENSG00000065618|COL17A1	0.09	0.29	0	0.29	0	0	0	0	0.05	0	0	0	0	0	0.32	0	0	0	0	0.18	0	0	0	0	0	0	0	0	0	0	0.07	0	0	0	0	0
ENSG00000065621|GSTO2	1.12	1.06	2.79	1.05	2.7	2.98	2.32	0.5	1.54	1.57	0.55	1.57	0.44	0.66	1.24	1.11	0.11	0.98	1.31	1.26	0.92	1.35	0.84	1.43	0.66	0.78	1.32	1.59	0.67	1.67	0.95	0.41	1.48	0.86	0.4	2.02
ENSG00000065665|SEC61A2	49.96	38.86	100.03	59.4	109.57	112.32	102.43	90.2	62.08	67.17	68.87	116.64	49.97	70.75	101.77	61.32	24.44	90.44	44.41	74.52	104.8	56.8	59.27	100.11	65.83	58.33	91.6	54.04	60.5	89.51	56.27	63.31	77.7	52.25	57.78	73.69
ENSG00000065675|PRKCQ	1.6	1.09	2.38	3.14	3.42	2.18	2.02	1.52	2.7	1.81	0.42	0.39	1.97	0.32	0.23	2.91	2.19	0.53	1.29	0.79	0.08	2.52	2.21	1.12	2.21	2.22	0.31	2.13	1.66	1.16	1.97	2.44	0.38	1.06	1.45	0.53
ENSG00000065717|TLE2	13.62	26.64	31.21	26.77	31.62	30.96	20.44	23.82	31.75	47	46.71	92.9	38.85	56.06	91.54	37.27	25.8	31.91	44.14	53.75	80.34	36.88	33.07	34.02	28.67	26.32	26.5	20.15	29.25	24.09	28.75	44.89	40.01	23.34	20.96	22.62
ENSG00000065802|ASB1	24.11	20.5	18.71	20.88	21.22	19.43	27.6	20.64	30.49	28.04	23.85	18.63	25.29	24.07	21.58	34.04	46.96	29.48	23.61	21.9	20.81	24.12	30.19	25.24	31.67	30.55	23.52	33.01	30.75	26.91	27.75	25.58	24.1	33.98	32.99	33.52
ENSG00000065809|FAM107B	59.58	50.25	90.66	58.79	93.7	88.09	96.76	92.73	67.94	54.99	88.82	94.41	71.08	90.47	119.79	77.25	66.84	143.33	49.34	87.39	83.88	71.74	77.99	149.18	87.43	75.65	133.11	90.51	98.72	172.17	93.83	101.24	176.35	93.32	86.49	185.95
ENSG00000065833|ME1	1.1	1.34	1.41	0.55	0.6	0.86	0.37	0.51	0.69	1.3	0.38	0.35	1.12	0.69	0.07	4.94	4.31	0.38	0.36	0.56	0.57	3.82	1.87	0.17	3.81	4.89	0.21	5.36	2.47	0.55	1.52	1.37	0	3.26	3.23	0
ENSG00000065882|TBC1D1	113.26	134.48	20.8	117.77	19.25	20.38	24.94	31.91	67.2	147.45	75.4	18.74	133.94	70.79	32.33	134.37	150.62	24.79	107.31	86.87	35.35	130.34	110.37	24.03	82.9	93.55	26.62	82.14	62.89	34.22	107.15	90.24	41.03	63.39	63.25	32.08
ENSG00000065883|CDK13	63.73	59.04	57.68	59.04	78.48	62.13	61.38	38.52	61.14	60.23	69.47	51.17	56.58	55.37	58.32	88.46	47.65	63.91	70.89	67.66	53.61	70.89	69.05	92.23	91.92	91.36	73.41	79.53	65.27	84.68	66.72	78.44	84.5	84.31	87.62	65.72
ENSG00000065911|MTHFD2	68.84	65.96	28.22	61.27	29.17	36.54	34.93	48.51	34.39	29.61	28.08	19.75	36.35	26.61	22.54	371.29	271.44	246.16	40.86	35.13	27.66	49.81	38.39	40.31	396.12	299.69	239.09	39.4	32.35	37.76	32.68	36.27	42.83	405.7	304.38	311.06
ENSG00000065923|SLC9A7	16.07	16.59	27.82	19.74	29.4	27.88	24.88	15.87	19.27	16.56	20.38	20.48	15.16	22.43	22.33	11.24	4.47	31.69	16.17	19.22	19.08	11.24	14.28	30.5	8.35	7.43	29.88	8.9	11.79	20.39	6.48	11.26	23.86	9.61	4.74	30.92
ENSG00000065970|FOXJ2	18.41	17.25	23.46	20.49	24.45	21.65	20.89	15.11	20.48	18.25	19.34	21.31	21.87	19.69	21.13	25.91	9.72	24.35	21.38	19.46	19.54	18.71	21.35	24.86	24.34	24.48	28.18	25.67	28	31.38	25.95	24.33	27.24	24.43	23.87	30.15
ENSG00000065978|YBX1	1388.79	1220.35	1561.13	1269.91	1017.92	1312.02	1194.49	968.44	1193.7	1242.26	1529.98	1849.38	1228.09	1643.94	1934.06	705.4	904.46	1229.73	1309.64	1604.19	1967.09	1081.38	1064.01	1235.94	677.76	740.93	1252.38	1158.08	1140.06	1018.22	1180.12	1210.72	949.71	665.73	749.33	1001.33
ENSG00000065989|PDE4A	2.77	2.66	28.07	4.28	20.63	21.12	17.16	9.43	14.8	1.82	15.05	20.58	4.56	16.27	20.7	2.98	2.82	10.76	4.31	15.9	25.14	3.47	5.29	12.36	2.84	3.17	10.04	2.28	4.48	14.05	4.68	4.96	10.17	2.34	2.01	7.22
ENSG00000066027|PPP2R5A	11.34	9.35	3.24	15.11	2.95	2.7	5.19	4.31	6.78	12.17	6.01	8.65	13.16	7.29	6.39	16.12	11.94	8.82	10.56	8.19	7.55	16.95	14.86	10.25	15.35	19.4	10.19	11.98	16.67	9.33	13.53	15.2	5.58	11.43	13.15	7.78
ENSG00000066032|CTNNA2	25.96	23.94	136.59	25.07	152.78	154.51	130.87	125.83	117	22.07	93.55	151.66	29.21	93.43	153.35	18.85	12.65	75.53	19.59	83.33	152.61	14.62	29.61	71.23	16.32	10.94	62.8	23.65	54.21	60.84	18.19	31.32	74.02	15.8	11.03	57.99
ENSG00000066044|ELAVL1	100.88	85.92	58.96	104.11	57.5	53.66	62.51	46.88	75.84	97.19	64.65	62.91	76.84	64.92	63.92	62.7	56.6	62.05	97.95	72.81	70.18	74.32	62.55	56.07	61.96	58.63	55.97	65.02	61.69	56.03	74.84	67.01	46.34	52.58	62.84	56.92
ENSG00000066056|TIE1	0.6	0.73	0.18	0	1.11	0.19	0.16	0.07	0.84	0.15	0.31	0.29	0	0.14	0.38	0.4	0.27	0.21	0.16	0	0.08	0.41	0.36	0.09	0.3	0.63	0.23	0.42	0.32	0.32	0.45	0.27	0.33	0.22	0	0.84
ENSG00000066084|DIP2B	41.54	36.53	47.74	38.68	48.25	46.32	48.78	41.43	44.26	37.76	42.33	38.46	42.18	41.3	34.74	54.95	18.35	49.86	46.01	45.04	37.21	45.29	49.07	50.61	54.32	50.72	42.82	55.4	65	58.71	59.1	66.53	74.45	47.96	48.43	56.56
ENSG00000066117|SMARCD1	171.34	158.24	161.92	185.95	173.93	157.96	212.47	163.92	201.53	183.7	181.82	168.25	180.84	186.46	145.12	241.89	119.02	228.21	204.6	184.23	152.12	181.61	207.62	233.94	222.05	191.37	213.14	234.99	247.08	199.03	268.61	228.33	204.01	252.4	205.65	228.14
ENSG00000066135|KDM4A	55.01	49.34	72.64	50.3	69.86	66.19	77.61	68.29	67.26	52.58	79.03	73.35	60.35	66.7	67.54	91.74	44.52	86.94	60.32	76.64	75.67	58.81	65.56	70.05	87.54	78.58	76.95	69.59	67.34	75.81	72.02	67.13	86.91	74.54	79.2	83.82
ENSG00000066136|NFYC	58.48	49.46	73.36	63.11	67.72	73.66	92.68	82.51	73.22	56.25	70.45	64.02	55.33	62.27	69.76	70.59	56.46	65.03	55.15	57.77	74.84	64.5	65.69	47.1	74.41	68.81	59.29	71.97	64.11	55.54	73.43	68.44	64.26	69.07	59.61	60.37
ENSG00000066185|ZMYND12	0.15	0.32	0.22	2.73	0.63	0	0.57	0.22	0.4	0	0	0.76	0.19	0	0	0.18	0.42	0.25	0	0.5	0.6	0	0	0	0	0.38	0.36	0.16	0.16	0	0	0.2	0	0	0	0.18
ENSG00000066230|SLC9A3	7.26	4.26	7.39	7.12	4.83	9.66	12.33	2.13	5.46	8.15	8.15	12.4	5.96	5.63	7.27	4.57	9.89	9.31	8.7	9.63	7.81	11.19	9.76	11.63	4.84	8.61	9.15	8.61	6.61	6.25	8.64	7	9.54	8.64	6.68	9.91
ENSG00000066248|NGEF	2.34	3.41	7.47	3.25	3.19	13.2	7.73	1.86	2.75	4.39	3.17	34.03	0.08	6.72	27.79	2.51	2.73	10.04	0.3	2.74	19.15	1.14	3.03	6.03	2.89	0.94	11.94	0.08	4.12	2.72	1.07	0.12	0.09	1.69	1.32	6.5
ENSG00000066279|ASPM	48.06	40.79	1.11	41.14	0.26	1.18	2.98	10.24	24.04	29.58	15.71	0.46	22.86	12.96	0.18	22.42	15.59	0.14	29.59	20.4	1.71	41.9	44.26	0.53	13.27	25.53	0.38	45.36	32.34	0.99	47.4	49.55	0.46	11.68	16.73	0.24
ENSG00000066294|CD84	0.14	0	0.13	0.05	0.16	0.21	0.03	0.09	0.03	0.09	0.08	0.14	0.12	0.03	0.03	0.09	0	0.11	0.06	0.06	0.2	0.06	0.11	0.03	0.18	0.06	0.17	0.09	0.05	0.06	0.11	0.11	0.03	0.1	0.15	0.05
ENSG00000066322|ELOVL1	17.71	14.22	8.86	17.92	10.48	13.82	12.29	10.57	11.57	22.84	18.51	14.99	20.38	24.54	14.2	16.26	25.06	16.79	25.61	15.09	10.99	22.41	24.56	16.83	25.57	21.15	14.39	21.48	26.54	18.55	19.44	20.11	14.84	17.55	19.99	17.27
ENSG00000066336|SPI1	0	0	0	0	0	0	0	0	0	0	0.24	0	0	0	0	0	0	0	0	0	0	0	0	0	0	0	0	0	0	0	0	0	0	0	0	0.22
ENSG00000066379|ZNRD1	32.89	39.31	27.46	39.02	22.76	17.02	15.99	27.4	24.65	35.59	26.56	25.11	32.06	31.89	21.55	33.34	29.85	28.35	29.72	27.07	24.56	26.9	24.77	31.76	37.13	29.6	36.44	33.23	26.15	31.79	39.04	31	25.41	30.29	43.6	33
ENSG00000066382|MPPED2	132.19	125.71	56.26	106.24	41.79	40.12	28.7	33.97	78.17	143.8	100.16	64.9	151.26	104.23	46.6	137.12	99.28	106.35	138.84	108.72	46.88	150.49	128.54	95.31	108.12	156.36	109.65	106.28	83.36	82.97	109.09	101.43	72.39	85.69	102.68	92.71
ENSG00000066405|CLDN18	0.47	0.35	0.16	0.54	0.1	0.15	0.13	0.15	0.15	0.12	0.3	0	0.4	0.14	0.12	0.2	0	0	0.57	0.16	0.38	0.14	0.57	0.15	0.15	0.21	0.12	0	0.13	0.12	1.24	0.22	0.15	0.28	0.15	0
ENSG00000066422|ZBTB11	22.81	27.88	32.25	23.84	35.8	40.7	31.01	33.45	35.24	23.1	31.02	28.78	27.03	29.24	30.94	34.41	18.13	47.8	22.32	24.57	29.98	31.13	33.9	43.63	31.99	28.91	43.98	30.81	34.85	42.81	32.67	27.44	39.58	30.99	25.17	41.12
ENSG00000066427|ATXN3	34.76	34.17	28.3	35.25	33.88	44.8	28.64	35.35	36.96	31.54	27.76	16.01	31.97	22.74	20.14	41.79	45.02	33.47	44.3	19.41	23.69	41.4	43.15	23.39	40.53	43.4	26.34	47.18	34.67	28.06	44.81	46.07	31.02	30.49	38.43	31.58
ENSG00000066455|GOLGA5	30.7	27.36	30.52	25.71	32.33	28.89	31.1	28.9	23.56	24.55	27.86	29.72	28.2	27.71	30.83	53.03	31.9	34.21	26.87	30.62	30.1	35.71	24.6	34.72	55.05	56.54	38.65	28.37	38.83	41.49	29.94	30.64	31.18	47.39	49.92	41.09
ENSG00000066468|FGFR2	118.54	102.35	3.79	165.38	10.6	8.31	25.91	32.81	68.46	130.65	70.47	12.35	123.89	99.78	9.95	152	116.13	93.82	114.99	91.86	11.08	126.37	115.14	116.01	117.72	116.03	97.94	33.45	68.61	283.44	69.36	59.48	359.55	88.41	80.34	221.91
ENSG00000066557|LRRC40	47.27	38.03	66.63	40.37	57.62	58.67	50.09	58.91	50.07	38.45	53.8	48.72	44.85	51.42	49.93	44.72	32.34	57.23	40.72	53.21	58.07	46.21	49.14	56.74	40.73	38.85	54.94	45.81	46.75	61.13	49.53	50.28	58.21	41.84	34.7	54.58
ENSG00000066583|ISOC1	18.84	17.81	22.4	21.94	20.1	18.09	15.59	11.47	16.53	16.99	16.79	15.02	18.49	16.6	14.06	14.45	22.1	12.95	15.35	18.32	18.59	20	22.14	11.03	16.21	14.99	15.9	24.08	23.25	58.22	17.74	21.2	5.1	12.85	10.93	10.44
ENSG00000066629|EML1	67.32	67.81	39.85	79.99	24.99	37.65	28.17	43.72	43.4	51.15	91.82	149.08	51.51	91.01	170.62	63.99	41.38	117.68	64.74	88.99	154.72	49.98	47.29	89.31	59.57	38.71	103.98	43.32	30.38	62.96	50.11	26.39	70.56	58.68	38.92	61.99
ENSG00000066651|TRMT11	47.62	51.01	35.74	45.15	39.89	38.29	50.4	51.46	44.15	41.94	27.35	17.03	43.91	27.52	21.86	46.06	32.69	48.55	31.88	26.44	20.55	42.71	35.05	34.9	50.38	47.57	56.43	29.44	31.95	38.55	29.83	25.33	31.04	45.01	47.68	39.58
ENSG00000066654|THUMPD1	67.62	61.12	58.41	67.03	73.78	75.13	74.63	80.72	58.73	57.57	67.29	55.57	59.91	55.15	63.01	80.74	44.25	86.8	66.05	62.88	62.79	59.61	70.1	84.13	71.79	73.86	77.8	70.12	76	95.89	67.86	65.41	77.96	81.33	63.19	88.71
ENSG00000066697|MSANTD3	51.35	47.49	68.78	42.08	78.45	71.92	68.26	57.21	53.12	49.65	64.43	58.69	52.18	59.16	58.82	57.53	54.25	68.73	49.5	50.55	66.51	57.5	67.23	73.37	65.45	55.48	80.96	81.06	72.4	83.91	69.37	65.93	88.89	69.88	61.21	100.39
ENSG00000066735|KIF26A	10.48	11.14	6.27	12.22	12.27	11.9	15.04	6.61	17.35	6.74	75.23	64.46	13.87	87.87	85.45	16.35	15.49	41.33	8.52	61.15	50.93	8.2	15.13	22.18	21.1	12.09	32.39	13.78	16.18	14.05	20.86	18.34	26.03	27.23	15.14	21.99
ENSG00000066739|ATG2B	19.53	19.39	34.13	20.33	29.07	19.46	21.01	26.56	21.24	16.58	17.88	21.88	24.92	17.42	22.65	43.34	8.65	37.42	22.71	19.16	30.87	22.82	20.52	26.2	21.92	37.27	23.07	24.37	34.28	28.67	30.27	29.2	29.69	38.6	35.47	32.04
ENSG00000066777|ARFGEF1	38.75	33.84	46.71	26.19	40.36	43.31	41.04	32.05	39.73	36.57	36.59	37.61	33.77	38.36	38.85	49.6	42.47	41.19	37.26	26.48	38.07	54.46	35.88	46.88	45.06	44.34	42.72	34.68	39.62	42.53	36.04	30.84	48.96	46.56	44.26	39.54
ENSG00000066813|ACSM2B	0	0.19	1.4	0.76	0.15	0.26	3.21	0	1.79	1.91	0.12	1.76	2.53	0.79	1.41	0.32	0.08	0.15	0.98	0.36	0.31	0.3	0.1	0.39	0.5	0.23	0	0	0.11	0.31	0.19	0.31	1.92	0.23	1.49	0.19
ENSG00000066827|ZFAT	4.05	5.12	4.06	7.55	6.3	5.44	5.35	5.91	4.08	3.23	5.63	8.01	4.66	5.63	7.56	3.84	9.14	6.69	3.4	6.31	9.87	3.07	7.72	6.53	7.71	6.15	6.9	6.03	2.83	7.25	5.64	5.73	11.77	6.45	6.55	6.79
ENSG00000066855|MTFR1	46.16	27.95	33.84	34.86	31.84	34	38.34	35.49	39.97	30.11	36.84	26.96	33.59	38.64	40.75	33.92	28.48	51.33	57.08	37.5	29.35	28.81	41.25	61.72	62.88	43.28	60.98	33.81	42.21	47.14	46.39	47.05	70.58	59.28	46	58.91
ENSG00000066923|STAG3	30.77	30.46	54.41	29.73	71.56	49.63	59.82	20.38	40.8	23.64	33.33	38.43	28.14	26.37	40.1	50.32	13.56	55.32	26.49	48.01	49.66	41.16	54.45	43.24	50.49	47.8	43.84	48.57	43.39	49.91	55.94	53.66	54.7	53.63	39.74	52.75
ENSG00000066926|FECH	10.47	16.43	16.73	15.08	13.81	15.09	11.54	11.25	11.03	11.94	10.92	13.14	11.34	14.43	15.94	20.28	16.13	14.26	11.46	12.58	14.16	18.59	22.09	17.42	27.36	34.12	16.76	16.2	17.04	14.68	14.21	14.36	26.05	22.49	23.01	13.32
ENSG00000066933|MYO9A	17.56	19.83	39.32	18.78	34.36	34.47	33.09	26.2	30.81	16.7	30.59	43.17	18.5	23.6	37.5	35.1	21.04	45.67	20.52	28.67	36.4	18.36	28.11	39.88	22.49	28	39.03	22.41	28.46	42.73	31.05	23.8	47.07	23.26	26.06	39.32
ENSG00000067048|DDX3Y	0.1	0	0.11	0.05	0.42	0.06	0	1.42	0	0	0	0.91	0	0	0.09	0	0.07	0.62	0.09	1.05	0	0	0.42	0.91	0.24	0.47	1.51	0	0.19	0	0.8	0	0.11	0.12	0.52	0.18
ENSG00000067057|PFKP	84.99	78.17	75.08	84.34	83.69	69.34	37.27	30.94	25.69	39.59	26.46	30.14	57.57	42.17	27.58	51.19	38.82	58.78	61.41	41.53	29.17	65.49	61.9	68.64	46.17	50.6	58.62	46.96	32.62	95.42	76.75	50.27	87.28	43.17	40	62.22
ENSG00000067064|IDI1	366.74	305.03	341.17	315.79	206.8	302.3	251.29	356.77	271.04	348.11	296.86	225.22	367.9	268.64	218.25	264.27	183.94	170.97	404	353.15	286.69	343.45	256.16	166.31	179.61	166.38	179.09	188.11	195.4	124.62	182.52	193.71	119.21	158.42	143.11	173.35
ENSG00000067066|SP100	3.04	2.46	2.38	2.34	2.48	2.49	1.93	3.52	2.95	3.19	3.69	2.17	3.02	2.2	2.09	2.48	1.66	1.51	3.21	2.56	1.97	3.1	2.81	2	2.19	2.38	2.15	3.39	3.37	2.4	3.15	3.55	1.98	1.49	2.33	1.52
ENSG00000067082|KLF6	35.29	43.98	46.39	51.09	58.2	71.42	71.27	75.83	50.76	63.68	62.32	42.96	73.59	59.43	44.54	86.34	83.05	54.41	60.58	56.62	44.74	115.7	100.7	56.19	87.64	97.02	60.47	72.66	82.71	31.06	74.57	89.26	34.68	79.94	81.19	60.41
ENSG00000067113|PLPP1	9.46	6.12	25.65	9.25	19.51	20.47	11.85	16.46	7.74	11.02	12.06	11.66	12.82	7.33	11.77	9.19	7.16	13.48	7.6	12.19	18.62	8.99	9.84	13.12	8.71	9.89	11.6	10.11	8.23	10.36	5.59	11.81	6.05	12.08	7.87	12.69
ENSG00000067141|NEO1	52.32	46.6	159.53	68.28	169.64	144.66	142.41	109.45	91.14	44.06	236.49	370.15	63.13	237.12	427.47	46.94	17.23	116.54	50.11	208.3	371.4	46.51	57.43	94.25	36.38	41.28	101.94	42.32	55.32	108.48	36.03	35.87	87.49	47.04	40.91	100
ENSG00000067167|TRAM1	78.44	69.31	28.71	81.68	30.38	40.26	37.09	40.13	42.86	58.02	41	29.13	61.21	40.74	30.32	123.44	60.87	50.8	66.14	44.6	24.87	61.85	63.14	42.42	144.3	167.1	58.39	72.75	66.46	47.68	52.77	59.49	33.84	125.3	150.47	51.51
ENSG00000067177|PHKA1	6.17	7.86	2	8.67	1.13	1.57	1.19	2.1	3.99	8.01	2.26	0.33	5.96	2.3	0.1	11.78	6.64	1.18	7.06	3.06	0.69	7.19	6.71	0.41	9.23	11.45	1.41	4.18	5.21	1.16	3.79	6.25	1	5.68	8.41	1.25
ENSG00000067182|TNFRSF1A	14.38	14.42	13.04	20.69	14.5	8.11	17.83	22.69	13.78	14.39	14.87	4.84	13.54	17.33	11.38	48.46	25.86	9.58	8.01	9.94	12.62	24.96	26.16	18.93	36.91	41.97	13.99	21.31	32.3	18.95	22.57	20.9	23.68	41.89	76.2	19.05
ENSG00000067191|CACNB1	21.76	26.83	54.01	20.35	62.76	57.16	43.46	37.84	59.29	27.24	58.16	62.65	52.18	56.14	53.07	54.53	20.92	65.11	24.87	58.14	53.57	40.76	48	75.08	45.52	43.26	66.52	24.7	33.07	62.11	29.78	27.98	67.9	34.08	40.18	67.63
ENSG00000067208|EVI5	13.85	13.71	14.93	13.94	10.62	12.51	17.26	9.15	10.32	8.59	7.81	6.81	14.69	10.03	7.39	14.69	5.86	7.31	14.68	10.44	9.78	10.05	15.57	4.96	13.01	10.34	6.38	11.44	17.67	5.65	9.98	15.11	13.39	7.46	12.89	7.41
ENSG00000067221|STOML1	11.24	11.37	36.4	8.5	40.56	37.9	34.8	25.15	24.28	9.97	29.99	48.01	12.7	29.38	48.4	27.75	17.59	54.55	12.93	29.43	46.33	17.49	20.33	38.84	17.97	15.1	48.57	10.39	23.84	49.46	18.1	18.67	48.56	20.78	17.8	43.86
ENSG00000067225|PKM	933.45	912.73	563.13	1142.51	548.75	528.03	563.75	576.32	493.15	797.58	409.66	394.37	783.39	488.91	373.77	376.45	413.21	281.21	959.01	587.44	471.57	746.05	632.09	355.23	311.51	336.07	281.88	660.85	431.5	533.95	578.2	451.38	342.48	286.14	264.3	262.6
ENSG00000067248|DHX29	34.63	28.72	51.35	28.01	48.98	58.8	45.46	52.59	37.84	33.58	46.69	47.68	33.05	45.65	49.33	39.84	33.82	53.37	30.89	38.26	51.9	37.74	36.71	44.89	37.35	37.36	48.42	34.44	43.66	59.01	36.51	33.22	48.65	37.16	38.29	46.92
ENSG00000067334|DNTTIP2	61.33	59.5	60.16	56.34	64.28	59.19	62.9	73.36	58.42	63.62	72.84	65.29	68.7	58.69	52.55	71.67	74.49	82.64	59.25	67.4	64.68	68.81	76.5	78.98	74.25	64.65	80.68	77.96	77.67	83.15	91.39	74.53	71.03	74.18	79.26	91.63
ENSG00000067365|METTL22	46.43	54.92	36.89	37.27	106.66	78.69	60.77	52.36	48.31	39.97	37.76	48.66	36.57	38.61	42.34	61.82	46.1	63.01	29.9	47.5	36.64	39.49	41.38	62.63	69.34	54.31	63.08	35.85	44.42	69.39	42.61	39.77	48.13	46.23	48.55	62.85
ENSG00000067369|TP53BP1	106.74	97.17	155.81	116.02	178.89	144.56	165.5	144.08	123.29	89.86	97.8	106.26	85	97.47	86.26	113.93	50.95	114.6	110.56	116.64	111.66	92.56	108.82	79.42	98.45	95.5	85.31	76.29	70.64	88.54	87.95	89.2	107.77	94.02	83.36	90.59
ENSG00000067445|TRO	131.54	127.39	204.71	124.07	263.4	204.96	192.46	181.96	187.1	119.21	154.37	167.35	140.49	137.32	152.57	224.93	168.44	230.34	154.7	139.24	161.93	161.94	181.7	213.4	211.39	208.45	241.47	127.01	163.94	180.94	171.73	151.34	226.03	178.58	144.55	222.46
ENSG00000067533|RRP15	13.16	19.19	13.36	11.52	9.73	11	9.23	11.03	7.28	18.77	10.4	8.66	10.49	10.37	7.72	13.52	7.38	22.13	18.03	11.44	10.64	8.06	11.9	10.82	15.96	11.13	13.96	10.51	13.18	12.63	9.32	9.67	17.28	13.96	18.7	15.99
ENSG00000067560|RHOA	230.22	227.38	124.7	226.91	139.95	125.36	138.76	157.01	152.37	251.4	186.21	144.26	247.83	205.07	139.48	185.9	211.55	126.61	225.26	195.62	142.16	268.57	274.74	161.2	171.67	205.63	137.61	248.51	269.75	175.38	266.96	300.63	165.8	164.57	194.22	130.29
ENSG00000067596|DHX8	37.04	38.64	65.87	36.7	27.55	25.58	39.54	35.02	108.56	33.89	41.82	25.26	38.36	50.72	81.81	37.8	47.18	32.88	40.54	37.86	35.63	38.68	35.56	26.6	33.43	31.82	32.38	43.42	45.29	38.97	43.07	44.63	27.8	33.62	36.2	37.64
ENSG00000067606|PRKCZ	26.54	23.04	83.22	22.88	56.66	70.64	70.28	57.49	54.37	25.34	59.33	88.72	24.56	62.07	81.45	26.54	30.93	62.54	20.23	61.52	91.09	20.77	29.06	58.56	24.33	20.62	71.22	27.1	29.04	53.73	26.11	28.04	58.49	26.51	21.71	60.1
ENSG00000067646|ZFY	0.35	0	0.54	0	0	0	0	0	0	0	0.12	0	0	0.5	0	0	0	0	0	0.51	0	0	0	0.56	0	0	0	0	0	0	0.4	0	0	0	0	0
ENSG00000067704|IARS2	54.8	60.09	60.83	64.46	46.22	50.35	55.15	58.53	54.6	54.33	59.26	61.38	56.57	57.89	59.99	49.67	56.84	54.68	59.22	61.47	64.24	47.71	47.95	51.15	44.06	47.17	48.07	45.11	42.49	49.47	46.11	47.71	40.51	41.22	40.66	44.18
ENSG00000067715|SYT1	52.18	43.27	223.73	58.38	219.07	207.26	205.53	234.47	113.45	47.38	220.96	306.73	63.42	220.01	323.33	67.2	33.15	131.06	53.25	201.72	294.13	40.85	57.81	148.99	62.75	38.31	119.57	44.18	64.67	101.01	43.12	45.81	95.76	63.89	32.72	99.36
ENSG00000067798|NAV3	15.12	9.7	64.21	2.35	53.35	59.51	37.53	33.6	34.53	16.19	33.83	72.71	13.18	28.15	69.74	30.27	8.61	84.33	16.55	20.2	60.4	20.86	31.13	49.69	30.07	19.38	53.03	20.22	47.84	36.45	29.53	33.83	42.46	10.48	12.55	46.75
ENSG00000067829|IDH3G	45.57	44.12	57.27	39.42	57.19	58.7	64.69	54.46	52.63	62.19	52.98	68.03	52.42	58.68	75.52	63.31	68	61.48	54.17	55.71	83.9	67.85	56.86	53.09	57.68	54.03	63.5	53.42	71.75	77.84	56.6	59.16	67.42	66.05	69.61	74.59
ENSG00000067836|ROGDI	22.91	24.3	88.74	22.78	74.7	82.01	76.41	53.91	58.22	36.23	68.82	117.23	37.46	74.69	124.84	32.66	29.8	67.96	30.59	70.87	95.33	34.19	34.43	79.47	34.67	32.51	69.18	31.75	25.81	68.4	35.74	36.71	63.58	25.77	22.72	45.89
ENSG00000067840|PDZD4	85.95	83.12	254.04	86.22	289.25	277.06	244.16	102.91	217.14	95.24	161.37	229.03	109.45	182.28	239.72	78.82	92.15	163.81	97.58	163.77	216.93	90.14	108.26	183.28	83.62	70.37	167.55	88.85	125.37	178.18	123.33	136.51	195.91	103.88	85.09	159.19
ENSG00000067842|ATP2B3	1.14	0.38	15.99	0.72	11.26	11.43	8.21	8.02	6.5	1.13	6.11	17.13	1.01	7.21	15.69	0.81	0.13	8.34	0.47	9.56	20.24	0.18	0.46	7.91	0.42	1.45	7.24	0.08	1.26	4.48	0.06	0.31	5.36	0.42	0.73	4.3
ENSG00000067900|ROCK1	57.69	56.28	58.91	55.7	58.78	50.43	58.91	57.24	55.58	52.98	54.9	51.63	56.55	48.88	56.25	70.68	32.21	55.27	51.3	55.02	49.64	58.32	71.2	56.29	71.29	65.16	60.05	73	76.12	71.02	81.1	78.19	70.26	77.69	63.67	72.68
ENSG00000067955|CBFB	39.55	47.71	26.37	48.42	27.41	26.69	36.82	32.08	35.87	42.46	37.37	45.74	57.19	42.16	49.92	36.76	18.76	32.57	46.99	41.49	49.37	47.58	43.86	35.01	41.88	37.98	33.89	49.86	60.11	36.5	55.74	59.69	31.68	43.96	35.21	35.74
ENSG00000067992|PDK3	19.35	19.89	9.86	25.49	14.87	14.54	11.88	12.2	9.5	11.67	4.95	2.3	13.45	8.43	3.26	10.48	9.76	2.91	11.23	8.64	7.05	13.61	9.15	3.25	6.81	9.23	3.31	8.64	8.59	3.75	10.67	11.18	2.01	5.86	7.97	3.09
ENSG00000068001|HYAL2	31.36	26.75	24.84	32.65	29.83	31.73	31.7	28.03	26.32	31.8	30.93	37.16	28.12	36.49	29.78	19.39	17.71	23.03	33.21	31.51	26.74	28.33	28.14	35.16	21.83	23.27	25.98	34.69	28.3	30.02	23.13	20.75	37.34	25.99	30.45	27.81
ENSG00000068024|HDAC4	12.24	27.52	13.86	21.56	22.21	33.38	22.04	18.19	10.02	13.09	7.79	8.45	9.63	9.12	9.63	13.52	5.22	19.32	10.5	11.83	17.44	11.86	11.24	13.5	17.32	24.09	13.92	20.13	20.91	46.47	20.81	26.97	38.73	25.15	20.88	21.26
ENSG00000068028|RASSF1	19.92	21.66	26.07	17.53	26.49	28.16	19.74	20.88	17.47	16.6	18.28	23.67	20.34	19.63	23.28	22.9	22.75	24.57	17.33	19.45	24.65	25.06	23.28	27.03	23.63	20.09	27.9	23.91	20.18	29.77	16.71	16.12	24.87	16.86	14.93	26.06
ENSG00000068078|FGFR3	223.09	256.01	4.25	393.9	0.99	9.34	44.15	46.37	112.53	309.4	85.36	2.15	315.9	99.96	1.98	155.23	98.85	3.24	334.09	158.52	11.08	181.1	109.7	2.58	79.43	86.54	4.24	42.63	67.26	3.63	59.04	81.55	1.02	36.84	35.94	1.19
ENSG00000068079|IFI35	1.05	0.46	0.97	10.31	4.69	0	0	0	0.53	0	4.15	0	1.07	0.89	0	0.83	0.72	0.96	2.75	0	0	5.41	0.49	0.29	0.99	1.94	2.57	1.1	6.47	2.86	2.68	2.7	0	1.21	2.24	0
ENSG00000068097|HEATR6	30.29	25.4	22.12	46.09	23.93	27.8	28.4	26.18	26	27.26	29.98	23.25	36.76	32.93	23.76	34.11	21.16	35.23	34.07	24.84	23.66	29.6	30.74	25.1	34.96	26.87	40.74	36.46	40.38	40.24	32.55	36.59	30.46	41.36	36.76	45.32
ENSG00000068120|COASY	45.83	43.32	43.29	42.87	37.95	32.98	39.82	31.95	45.94	44.77	34.94	28.97	40.77	34.06	41.06	39.32	71.51	41.62	43.79	31.99	26.49	36.74	39.4	41.24	37.23	51.6	42.58	33.44	36.55	39.07	41.36	38.23	43.59	56.26	38.28	41.04
ENSG00000068137|PLEKHH3	8.64	13.83	11.93	16.15	17.23	15.63	15.67	15.15	16.38	16.86	12.3	8.38	15.51	12.12	6.2	29.39	37.57	15.92	23.53	13.31	11.36	14.42	19.77	9.32	34.32	25.7	17.33	17.66	17.81	11.29	17.26	21.92	13.75	32.84	28.82	18.05
ENSG00000068305|MEF2A	27.86	34.86	36.62	31.25	37.96	33.07	35.62	31.83	35.12	22.09	28.72	29.28	25.38	24.72	27.24	43.34	18.39	45.83	24.73	24.29	31.22	28.82	28.12	39.19	39.69	32.6	37.78	29.1	37.14	39.99	29.94	31.31	44.45	45.64	35.61	46.95
ENSG00000068308|OTUD5	72.65	67.06	89.45	81.17	93.82	87.75	100.47	59.74	86.51	89.24	87.08	84.94	82.44	88.24	87.95	90.08	79.94	102.22	90.76	89.16	77.38	83.02	77.21	94.54	107.24	89.52	88.68	82.84	96.28	120.41	80.57	94.22	91.65	103.45	91.65	99.76
ENSG00000068323|TFE3	34.57	36.51	46.87	40.33	60.41	50.09	60.25	33.08	59.84	44.66	38.79	42.16	50.48	42.86	40.03	74.06	45.99	40.98	40.78	46.59	42.23	68.17	62.5	46.83	87.47	87.75	51.2	56.07	53.08	56.26	50.37	52.87	48.63	70.42	79.85	51.43
ENSG00000068354|TBC1D25	6.95	9.56	24.38	9.01	30.15	19.5	27.22	20.69	24.8	10.55	21.19	22.77	11.01	21.54	28.98	13.46	17.56	30.02	11.01	22.01	26.15	10.56	14.86	27.38	12.75	13.63	28.86	12.1	17.31	31.03	11.45	13.76	27.68	18.81	15.15	27.63
ENSG00000068366|ACSL4	47.41	38.54	189.37	36.28	138.55	143.54	109.29	121.72	79.73	29.79	77.81	136.06	30.87	72.01	137.79	30.12	14.76	87	34.63	86.17	137.79	25.59	30.4	93.5	25.12	23.43	95.11	27.47	34.88	85.26	32.38	28.85	86.89	28.11	21.77	81.96
ENSG00000068383|INPP5A	22.6	21.46	42.97	20.3	43.66	47.71	58.3	30.72	37.51	20.33	39.74	41.38	29.23	39.41	38.52	19.33	15.85	20.3	18.68	42.66	36.02	23.24	21.87	31.79	14.07	15.73	22.95	15.21	13.88	15.62	20.71	18.33	16.45	13.79	14.53	19.55
ENSG00000068394|GPKOW	21.76	18.41	20.2	21.35	23.76	18.6	21.44	18.44	18.04	20.24	21.45	15.02	22.51	19.61	14.98	16.18	22.02	16.6	18.6	17.47	18.43	20.12	18.86	17.15	26.43	19.97	21.13	23.18	23.59	22.71	28.49	22.86	20.46	23.48	22.44	23.83
ENSG00000068400|GRIPAP1	152.17	125.93	297.39	126.61	320.44	300.34	276.93	189.81	246.11	169.97	219.33	275.08	158.99	213.71	259.3	274.34	168.75	351.84	180.79	216.29	275.02	210.31	217.11	333.72	281.21	281.56	344.92	207.51	198.95	258.67	235	247.62	392.45	302.74	290.02	362.85
ENSG00000068438|FTSJ1	47.07	44.31	69.05	49.69	66.01	63.75	60.63	63.55	63.06	51.98	70.4	72.66	41.18	70.93	67.33	51.36	60.29	84.58	54.37	71.67	70.58	46.8	48.72	104.62	63.01	61.38	77.16	48.1	45	76.6	46.85	41.56	70.57	54.83	44.95	70.86
ENSG00000068489|PRR11	30.35	50.49	1.79	39.42	0.91	2.84	4.98	6.51	18.62	27.57	13.87	0.94	28.44	14.06	0.73	29.76	17.64	1.3	28.53	14.75	1.9	42.94	44.64	0.77	16.34	26.75	1.69	33.42	21.24	2.46	34.8	36.1	2.62	12.99	20.53	1.88
ENSG00000068615|REEP1	30.52	19	233.48	16.68	205.07	194.92	147.73	123.56	85.35	32.76	115.78	213.35	47.5	122.14	193.6	55.61	42.34	183.01	33.04	105.13	202.95	33.98	47.2	150.24	52.67	37.43	177.93	32.61	52.67	133.12	46.41	43.37	149.13	50.53	34.7	145.94
ENSG00000068650|ATP11A	28.57	20.4	27.55	42.26	40.76	22.48	28.97	21.57	41	21.55	22.82	13.35	27.84	22.17	15.33	26.4	5.25	25.2	26.77	25.47	16.21	30.72	30.02	18.96	18.97	21.37	18.18	17.5	12.52	17.65	24.18	20.96	20.01	23.74	14.61	17.52
ENSG00000068654|POLR1A	20.26	20.45	25.84	28.89	17.77	19	19.42	20.41	18.51	18.03	19.48	25.3	15.67	19.93	16.99	21.07	14.06	23.39	20.5	25.59	24.12	12.26	15.56	18.77	15.24	22.98	17.94	20.5	16.4	20.23	19.73	21.57	23.89	15.62	13.9	18.63
ENSG00000068697|LAPTM4A	119.81	120.6	127	132.32	137.97	126.03	180.21	179.59	119.35	199.88	162.66	98.99	198.29	167.41	105.24	208.4	197.73	161.53	169	157.57	101.2	210.24	191.24	166.21	221.95	222.73	165.35	185.65	164.88	163.98	195.37	178.37	166.49	215.3	232.06	154
ENSG00000068724|TTC7A	4.27	6.69	7.61	6.46	11.18	12.03	7.73	6.43	7.11	2.55	3.17	4.66	3.82	2.01	4.41	5.09	3.33	3.8	5.28	4.64	4.56	3.15	3.34	3.43	6.32	6.25	5.55	5.14	6.59	5.34	5.57	4.67	3.69	4.37	5.52	5.27
ENSG00000068745|IP6K2	218.12	196.92	252.23	202.55	353.13	338.63	366.99	329.97	290.85	240.87	349.24	263.79	301.88	310.89	243.93	390.05	331.52	442.44	272.92	273.52	246.48	343.59	352.45	598.42	351.36	278.82	419.61	307.92	362.38	552.7	363.55	301.7	597.06	375.96	282.57	488.82
ENSG00000068781|STON1-GTF2A1L	0.43	0.81	0	1.15	0	0	0	0	0.12	0.33	0.12	0.43	0.29	0.43	0	0	0.3	0.73	0.58	0.32	1.36	0.38	4.64	0.14	0.66	0.95	0.44	0.21	0.46	0	0.4	0.19	0	0	0.24	0
ENSG00000068784|SRBD1	21.26	22.56	11.56	24.04	14.37	13.9	11.74	18.03	14.89	13.14	12.06	11.28	17.84	13.32	10.48	22.23	12.82	13.35	14.47	13.22	12.25	15.66	12.35	10.56	23.31	20.09	11.79	15.3	14.2	12.59	14.06	14.89	12.62	16.03	16.42	12.44
ENSG00000068796|KIF2A	97.98	77.87	147.02	86.86	108.56	118.88	102.03	113.94	101.75	73.61	108.67	121.2	80.01	89.43	111.65	115.91	51.39	157.66	78.82	101.04	139.34	79.45	102.47	105.85	87.48	76.86	125.39	118.09	161.53	100.53	117.16	140.53	103.64	84.57	76.24	116.22
ENSG00000068831|RASGRP2	3.15	2.76	13.33	0.66	12.82	7.65	1.19	4.07	4.22	4.75	5.12	16.26	1.11	10.81	13.99	6.71	14.54	7.3	2.13	7.43	14.06	5.1	7.23	8.49	3.46	6.61	10.89	3.38	1.67	6.89	2.43	2.39	18.98	2.55	11.31	9.11
ENSG00000068878|PSME4	50.17	46.18	51.4	48.32	48.7	43.9	43.3	49.2	43.81	50.63	61.72	56.98	48.04	46.22	59.81	63.34	53.85	51.58	45.28	43.38	62.29	47.82	51.03	50.43	75.07	61.22	53.18	51.42	48.82	49.46	48	48.42	43.74	63.99	52.47	51.98
ENSG00000068885|IFT80	66.94	56.03	38.25	60.03	35.6	38.23	39.16	47.1	72.28	52.46	38.2	45.66	54.45	51.95	41.86	50.36	30.03	46.85	65.07	40.62	43.19	61.98	66.48	39.19	85.71	63.17	36.78	53.4	39.55	49.14	73.11	63.25	57.23	42.56	47.74	35.5
ENSG00000068903|SIRT2	34.35	33.32	88.11	29	89.61	81.7	77.32	70.73	64.66	50.48	85.59	89.33	47.88	75.34	91.21	62.1	67.43	69.65	36.61	71.17	95.36	65.23	69.02	76.04	82.47	71.31	80.36	65.54	106.01	66.09	89.59	115.14	83.96	69.56	60.9	73.88
ENSG00000068912|ERLEC1	39.7	41.65	53.24	49.02	59.04	64.93	50.91	53.68	42.87	42.14	48.78	53.1	51.07	47.67	65.26	81.34	60.66	53.69	44.54	41.16	48.73	52.8	52.65	57.9	93.15	86.14	54.88	56.84	61.95	52.66	60.5	55.34	45.37	84.92	92.78	60.06
ENSG00000068971|PPP2R5B	21.12	17.7	89.02	22.98	75.08	86.09	73.75	53.56	58.04	25.09	54.79	91.42	28.72	58.95	86.51	33.09	36.99	79.27	21.45	54.57	82.59	31.64	35.08	83.91	42.4	28.67	70.78	24.08	37.32	70.68	29.51	29.89	81.12	31.9	28.75	70.84
ENSG00000068976|PYGM	6.71	3.07	0.33	2.43	2.45	1.03	0.79	0.37	6.26	1.95	0.85	0.29	0.88	0.72	0.31	1.21	0.59	0.51	0.43	0.74	0.36	2.73	0.84	1.43	0.75	0.63	0.92	1.88	0.93	0.49	0.74	0.37	0.55	1.51	0.74	1.1
ENSG00000068985|PAGE1	0	0	0	0	0	0	0	0	0	0	0	0	0	0	0	0	0	0	0	0	0	0	0	0	0	0	0	0	0	0	0	0	0	0	0	0
ENSG00000069011|PITX1	0	0.09	0.24	0.44	0	0.13	0	0	0	0	0	0	0	0	0	0	0	0	0	0	0	0	0	0	0	0	0	0	0	0	0	0	1	0	0	0
ENSG00000069018|TRPC7	0	0	0.47	0	0.18	0.2	0	0.15	0	0	0	0	0	0	0	0	0	0	0	0	0.2	0	0	0	0	0	0	0	0.1	0.88	0	0	0	0	0	0
ENSG00000069020|MAST4	5.26	6.48	10.72	5.05	5.53	5.4	6.55	4.6	4.19	3.54	1.3	1.46	4.95	2.04	0.56	12.17	5.95	2.71	3.76	5.38	1.86	8.57	9.98	2.47	8.51	8.58	2.09	5.44	5.48	7.59	4.44	5.62	4.17	6.16	4.88	6.58
ENSG00000069122|ADGRF5	0	0	0	0	0.06	0.05	0.38	0.44	0.13	0	0.04	0	0	0	0	0	0	0	0	0	0	0	0	0	0	0	0	0	0	0	0	0	0.05	0	0	0
ENSG00000069188|SDK2	17.94	26.01	2.08	25.13	7.35	4.37	7.01	4.07	9.56	9.56	2.59	7.33	4.98	2.64	8.25	4.16	1.88	2.48	11.14	5.12	7.85	4.49	4.72	0.86	5.49	7.19	2.49	6.18	11.82	3.3	4.1	7.16	1.52	4.59	3.57	5.37
ENSG00000069206|ADAM7	0	0.06	0	0	0	0	0	0	0	0	0	0	0	0	0	0	0	0	0	0	0	0	0	0	0	0	0	0	0	0	0	0	0	0	0	0
ENSG00000069248|NUP133	51.69	37.7	38.23	46.17	48.46	44.82	40.65	45.25	39.25	55.43	43.68	43.25	41.58	37.97	36.05	43.11	46.62	34.24	39.68	43.79	40.25	36.73	43.55	37.61	42.61	37.99	38.57	57.07	56.17	47.3	45.31	42.51	38.05	47.63	34.67	46.07
ENSG00000069275|NUCKS1	286.83	264.34	213.4	273.55	219.78	189.95	194.7	213.83	210.27	212.75	166.75	159.84	209.16	166.73	157.5	173.92	204.31	178.93	225.23	190.88	178.75	192.29	198.39	137.68	156.72	174.84	170.49	214.28	201.05	148.59	198.58	204.64	125.65	134.55	155.14	160.51
ENSG00000069329|VPS35	97.81	66.79	93.33	107.53	118.17	93.53	90.83	97.37	83.5	96.78	91.44	103.42	94.85	88.39	82.13	102.26	76.49	90.01	101.77	100.84	90.87	94.25	101.96	79.13	102.67	102.2	89.93	92.07	106.99	101.39	91.28	101.48	96.06	95.86	102.3	92.97
ENSG00000069345|DNAJA2	65.27	52.99	90.57	62.16	86.52	78.04	75.49	79.78	65.8	62.93	70.36	66.77	58.49	66.97	64.49	81.52	57.63	78.2	60.92	62.54	71.07	70.04	61.11	73.17	82.7	66.91	81.14	69.05	65.52	79.11	58.21	55.76	65.2	69.09	75.61	73.42
ENSG00000069399|BCL3	1.85	0.79	1.09	1.08	3.29	2.64	1.37	0.49	1.65	0.84	0.39	0	0.13	0.27	0	1.34	0.24	0	0.45	0	0	0	0.39	0.99	0.86	0.85	0.36	1.65	4.4	2.57	1.64	0.54	1.05	0.79	0.38	0.58
ENSG00000069424|KCNAB2	11.41	10.84	19.72	14.45	27.43	21.91	24.56	15.18	25.9	8.49	13.01	18.22	8.01	11.74	16.76	9.74	5.79	11.41	6.82	9.82	15.25	9.98	14.54	12.45	7.07	9.7	13.19	9.87	11.37	12.68	14.85	8.73	12.5	9.05	6.81	10.8
ENSG00000069431|ABCC9	8.04	10.46	10.51	7.7	15.38	14.65	11.3	8.84	12.58	8.09	9.65	8.83	8.26	7.62	10.34	9.71	6.12	12.43	7.7	7.61	8.97	10.46	11.96	14.96	7.88	9.5	12.91	10.59	13.19	15.49	8.49	11.43	12.87	7.66	7.19	13.45
ENSG00000069482|GAL	0.45	1.19	0.52	0	0	0	0	0	0	0	0	0.55	0	0	0	0	0	0	0	0	0.87	0	0	0	0	0	0	0.47	0.92	0	0	0	0	0	0	0
ENSG00000069493|CLEC2D	9.77	13.15	6.35	10.62	6.49	8.18	6.67	4.32	6.72	17.69	5.57	4.1	7.81	5.6	4.8	10.65	5.92	7.38	13.28	5.8	3.3	14.47	18.9	8.07	12.51	13.62	11.73	15.03	12.37	11.55	19.91	27.67	14.45	9.29	12.42	13.32
ENSG00000069509|FUNDC1	34.3	29.89	39.13	38.48	47.01	43.21	47.39	49.26	39.07	32.33	40.53	36.1	42.43	36.36	39.23	26.51	39.41	29.95	34.54	32.12	39.83	43.81	29.78	32.94	33.41	31.06	25.71	30.78	35.25	32.38	27.54	31.11	23.32	28.66	27.43	23.65
ENSG00000069535|MAOB	0.75	0.75	0.56	1.97	0.54	0.23	0.63	0.81	1.58	0	0.31	0.24	0.51	0.31	0.56	1.35	1.98	0.39	0.3	0.54	0.1	3.1	3.16	0.11	1.44	1.41	0	2.36	3.05	0.75	0.69	1.56	0.12	0.65	0.52	0
ENSG00000069667|RORA	9.95	13.16	4.21	12.4	6.98	5.22	6.9	3.59	7.24	4.32	1.82	1.37	5.52	2.13	0.84	12.51	2.65	3.06	5.71	3.93	1.28	7.93	8.42	1.12	10.88	12.23	2.66	8.57	7.58	5.76	6.78	6.8	1.53	11.11	11	1.27
ENSG00000069696|DRD4	1.42	1.98	0.97	1.64	0.29	1.74	1.29	0.5	1.36	0.59	0.45	1.54	0.22	0.22	0	1.65	0.16	0.83	0.21	0.23	6.73	1.5	2.57	0.74	0.72	4.32	4.25	2.21	0.87	1.82	1.28	0	0.76	1.17	0.67	1.41
ENSG00000069702|TGFBR3	0.88	1.54	0.97	1.7	6.8	3.91	3.46	2.24	1.66	0.1	0.91	0.66	0.07	0	0.07	0	0.09	0	0.04	0.04	0.46	0.04	0	0.25	0.19	0.07	0.16	0.47	0.71	2.19	0.27	0.99	0.13	0.24	0.42	0.12
ENSG00000069764|PLA2G10	0.32	0	0	0	0	0	0.34	0	0	0.31	0.35	0	0	0.7	0	0.97	0	0.43	0	0.32	0.64	0	0.29	0	0.38	0.34	0	0	0	0.32	0.85	0.35	1.19	0	0.35	0.63
ENSG00000069812|HES2	0.77	0.45	0.41	0.05	1.42	0.58	0.7	0.48	0.61	0.35	0.38	0.15	0.63	0.28	0.87	0.49	0.18	1.1	0.06	0.06	0.54	0.11	0.32	0.84	0.57	0.37	0.3	0.29	1.07	1.08	0.34	0.43	0.21	1.28	0.28	0.67
ENSG00000069849|ATP1B3	178.24	132.95	166.24	145.91	214.45	184	154.41	160.68	171.42	156.38	205.96	179.15	216.53	167.9	208.43	145.06	221.24	154.06	145.46	171.33	189.77	163.23	198.86	182.11	247.79	149.82	186.56	128.96	122.1	129.21	170.86	141.41	134.43	159.3	144.2	134.03
ENSG00000069869|NEDD4	127.19	119.3	145.84	117	218.4	179.37	157.14	111.81	146.15	119.99	112.76	131.52	121.32	111.96	132.29	167.76	66.73	191.69	126.06	120.88	138.89	154.49	173.36	216.44	160.48	179.41	190.55	144.11	167.12	190.66	170.44	164.47	229.86	164.2	140.1	202.02
ENSG00000069943|PIGB	8.32	12.1	8.98	16.56	19.06	10.06	14.62	11.04	16.68	9.99	14.87	12.04	13.19	19.51	8.8	19.7	12.14	14.78	15.96	14.51	12.29	24.16	16.12	19.16	16.91	23.2	13.85	15.3	18.46	16.36	20.22	16.9	18.53	12.85	14.99	16.74
ENSG00000069956|MAPK6	66.07	55.86	107.4	60.71	106.8	98.51	118.14	130.45	103.15	52.6	77.63	66.15	55.78	71.54	64.18	76.19	33.87	82.28	50.85	75.33	70.47	48.67	60.31	79.87	98.91	82.94	79.96	63.34	71.8	77.47	63.77	65.56	74.41	95.15	88.05	90.63
ENSG00000069966|GNB5	36.78	39.64	66.37	46.57	70.77	62.78	64.19	56.17	47.5	43.5	61.49	60.8	43.84	54.6	58.42	45.94	22.71	57.5	41.85	56.08	67.22	45.43	48.18	58.13	46.19	36.77	65.65	35.72	45.77	53.06	42.43	43.44	62.44	32.84	35.31	58.19
ENSG00000069974|RAB27A	5.94	5.61	2.2	7.07	3.56	11.86	4.52	2.12	4.92	6.06	3.19	0.78	5.7	2.23	1.87	5.48	3.42	3.01	10.01	4.45	0.82	7.76	5.43	4.06	4.66	5.42	3.89	5.99	6.32	3.1	6.06	3.99	5.83	7.19	6.82	3.62
ENSG00000069998|HDHD5	45.95	49.36	53.7	50.23	41.75	49.76	59.46	42.16	43.66	42.92	55.28	59.32	42.18	54.34	61.57	32.97	43.26	59.83	51.41	52.21	69.16	42.83	35.93	55.58	40.41	34.09	55.58	35.73	36.37	65.3	42.02	37.58	59.85	38.67	31.58	66.12
ENSG00000070010|UFD1	54.08	41.99	39.93	85.7	33.24	34.92	46.07	63.75	35.89	76.21	50.7	49.05	70.17	50.87	49.71	52.37	56.55	34.53	52.55	49.92	47.48	65.25	59.69	43.99	51.97	48.35	38.67	74.1	52.87	58.36	76.66	69.33	45.03	41.21	97.45	35.52
ENSG00000070018|LRP6	43.78	43.66	32.53	44.32	38.7	37.34	28.5	29.21	41.24	44.62	32.48	22.28	48.02	33.74	24.26	64.7	21.29	37.96	50.61	36.25	30.83	57.91	54.27	30.9	46.32	45.76	32.85	45.91	49.3	39.86	47.45	43.58	39.26	47.89	47.37	37.83
ENSG00000070019|GUCY2C	0	0	0.07	0	0	0	0.06	0	0	0	0	0.08	0	0	0	0	0	0	0.06	0	0	0	0	0	0	0	0	0.07	0	0	0	0.07	0	0	0	0.06
ENSG00000070031|SCT	3.69	0	0	0	4.32	0	0	0	0	0	3.11	3.71	0	0	0	0	0	0	0	0	0	0	0	0	0	0	0	0	9.17	0	4.96	0	0	0	0	3.17
ENSG00000070047|PHRF1	23.21	25.93	18.58	25.83	17.08	19.93	22.17	13.32	19.78	21.41	19.94	17.06	22.97	20.8	15.95	28.06	14.81	26.07	24.51	17.82	15.73	22.12	19.46	18.73	27.91	23.89	23.64	25.68	24.32	26.01	29.17	25.55	30.5	29.87	26.02	27.74
ENSG00000070061|ELP1	52.59	44.36	80.96	47.24	86.31	77.78	65.19	56.32	62.45	45.58	58.68	70.64	47.23	55.82	70.01	50.66	44.48	67.74	57.07	58.23	73.51	46.02	51.02	67.04	50.64	50.99	66.39	45.44	51.95	63.5	57.87	53.59	74.49	52.09	47.64	74.33
ENSG00000070081|NUCB2	116.3	93.63	179.11	126.01	170.79	166.34	136.11	202.26	147.86	85.36	124.95	183.56	118.02	142.23	156.46	165.08	208.38	217.47	104.41	136.81	172.36	113.9	156.14	129.12	201.41	232.98	177.48	95.64	114.83	125.67	134.07	124.8	107.14	210.77	229.37	133.2
ENSG00000070087|PFN2	335.15	280.64	398.72	316.89	370.52	350.56	382.4	347.07	340.69	325.23	289.48	321.93	336.25	313.52	297.95	240.76	173.37	247.46	320.98	332.5	320.71	390.59	403.99	247.64	229.93	286.31	233.91	856.4	857.48	217.4	831.68	862.16	217.21	256.79	238.72	234.07
ENSG00000070159|PTPN3	1.56	0.89	1.39	0.86	1.66	0.57	1.13	1.45	0.26	1.13	0.94	0.03	1.32	0.2	0.05	0.86	0.67	2.44	1.11	0.46	0.7	0.39	0.49	0.3	0.23	0.6	1.46	0.19	0.14	0.39	0.48	0.06	1.64	0.26	0.07	2.56
ENSG00000070182|SPTB	1.25	1.49	14.4	2.5	5.92	10.17	9.28	6.92	6.47	0.92	5.2	10.16	1.85	6.18	8.43	0.83	0.6	5.13	1.58	6.72	10.15	1.33	1.34	2.71	0.46	0.99	4.69	1.23	1.66	2.58	0.98	1.14	3.85	0.56	0.55	2.11
ENSG00000070190|DAPP1	0	0.15	0.09	0	0	0.11	0	0	0.29	0.09	0.1	0.22	0	0.29	0.17	0.19	0.37	0.11	0	0	0	0.26	0.16	0	0.54	0.19	0.4	0	0.09	0	0.08	0.26	0.05	0.26	0.28	0.38
ENSG00000070193|FGF10	0	0.2	0.41	0	1.24	0.56	0.12	0	0	0.11	0	0.14	0	0.13	0	0	0	0.16	0	0	0.12	0	0	0	0	0	0	0.12	0	0.27	0	0	0	0.13	0.25	0
ENSG00000070214|SLC44A1	10.02	12.24	7.71	13.99	8.36	7.68	7.47	5.8	9.23	14.41	8.44	20.08	12.97	12.89	30.71	11.99	11.28	23.08	13.71	13.63	15.7	15.54	20.22	17.97	10.05	13.88	18.02	23.48	32.44	15.12	28.08	37.13	11.43	9.75	13.52	13.67
ENSG00000070269|TMEM260	21.07	20.59	22.17	18.81	44.49	29.82	27.85	29.48	30.87	19.78	21	25.27	22.5	17.74	20.65	28.22	11.42	34.05	22.88	24.01	19.98	26.05	27.38	35.28	32.45	27.58	27.14	26.97	36.69	32.17	26.64	31.79	37.01	33.44	33.34	29.46
ENSG00000070366|SMG6	31.8	21.01	27.52	21.48	29.81	26.54	30.6	22.11	33.88	27.07	23.35	31.84	27.57	30.31	34.45	28.57	40.71	25.29	32.21	30.66	34.3	29.18	23.48	29.44	30.95	34.72	33.8	26.9	26.29	25.65	28.2	24	30.58	30.19	30.94	32.83
ENSG00000070367|EXOC5	108.11	101.45	138.73	92.66	120.84	138.09	121.03	137.86	117.72	102.69	121.3	120.15	97.6	119.66	113.16	124.4	42.28	140.85	107.11	125.97	132.79	126.68	123.45	110.37	123.08	113.38	116.79	125.5	124.59	106.67	121.32	129.86	111.93	109.97	103.39	114.55
ENSG00000070371|CLTCL1	3.86	4.76	6.13	4.04	5.25	6.95	5.98	5.38	4.79	7.05	8.81	8.04	5.79	6.15	7.12	5.04	5.7	7.49	4.05	7.23	3.92	9.47	8.05	7.8	5.45	4.75	5.16	8.87	4.87	8.74	9.52	11.08	9.34	7.64	3.24	5.55
ENSG00000070388|FGF22	1.7	0.74	1.25	0.99	1.74	1.8	0.39	1.18	0.5	0.52	2.63	1.35	1.19	1.78	1.48	2.15	1.28	0.51	1.2	2.23	1.29	1.53	0.55	0.37	1.34	2.2	0.99	0.89	1.2	0.98	2.29	1.52	2.17	1.39	1.74	1.9
ENSG00000070404|FSTL3	7.83	9.4	6.78	12.03	8.11	8.28	7.96	2.72	5.87	8.15	6.51	9.01	6.91	5.27	4.23	11.7	9.66	6.86	4.01	9.88	5.4	8.17	15.32	15.08	17.48	12	12.98	4.69	7.79	13.8	10.39	9.97	11.37	16.61	8.27	11.73
ENSG00000070413|DGCR2	44.9	37.51	56.22	54.74	57.5	54.77	56.24	38.58	44.71	52.09	46	47.62	48.91	46.19	49.69	45.76	34.01	43.25	49.41	48.71	49.85	45.16	41.74	44.15	39.71	40.49	45.87	52.53	57.81	55.21	49.6	52	55.17	45.36	44.37	56.62
ENSG00000070423|RNF126	32	40.82	45.43	38.21	44.99	44.82	44.82	30.02	39.75	28.89	33.39	31.64	29.01	31.26	30.83	35.66	38.46	41.07	26.53	29	31.55	30.71	34.19	37.91	33.14	32.75	35.87	32.92	35.79	36.41	34.57	37.5	32.43	38.9	38.39	47.34
ENSG00000070444|MNT	26.43	22.72	47.42	27.1	47.72	43.5	51.03	23.69	53.71	24.71	43.54	45.12	30.56	33.93	48.78	46.78	19.05	64.48	32.53	46.08	44.67	45.08	44.83	58.1	53.97	38.51	49.98	30.99	30.3	48.35	36.54	33.5	53.47	51.24	40.09	61.76
ENSG00000070476|ZXDC	26.18	22.7	34.99	24.73	32.18	30.98	32.34	20.98	21.7	26.24	28.74	22.72	29.17	26.73	22.05	48.1	19.95	28.71	25.72	24.21	23.76	36.44	30.87	23.99	38.9	42.86	27.83	41.83	36.17	39.32	44.25	33.84	31.41	51.45	54.44	30.99
ENSG00000070495|JMJD6	27.13	39.28	43.03	25.94	34.68	43.44	37.29	35.37	42.92	25.03	37.56	29.92	32.81	33.81	30.33	42.48	34.07	39.49	36.29	36.05	29.01	39.04	35.11	48.5	33.29	28.08	47.96	42.01	41.01	55.95	31.95	30.47	45.01	32.91	23.62	40.1
ENSG00000070501|POLB	78.73	65.86	152.92	69.12	143.73	133.8	125.06	155.14	119.71	88.54	119.64	111.51	110.15	136.99	107.01	90.66	101.09	130.39	91.24	125.56	125.92	105.53	92.73	135.81	106.73	79.69	141.67	92.44	74.49	133.66	118.04	81.82	145.6	95.53	74.71	159.32
ENSG00000070526|ST6GALNAC1	0	0	0	0.53	0	0	0.23	0	0	0	0	0	0	0	0	0	0	0	0.1	0	0	0	0	0	0	0	0	0	0	0.86	0.19	0	0	0	0	0.21
ENSG00000070540|WIPI1	8.72	8.63	9.39	9.17	9.61	10.49	17.27	13.05	16.92	13.09	10.57	4.69	8.74	5.55	1.79	40.3	21.23	9.48	7.46	6.63	3.43	10.53	15.38	13.13	95.59	97.31	10.58	10.58	9.75	6.66	8.07	6.79	6.84	125.26	168.37	8.35
ENSG00000070601|FRMPD1	2.2	3.01	6.5	1.54	6.31	0.78	6.07	1.67	4.17	1.71	0.2	1.57	0.34	9.96	5.48	5.18	2.55	0.38	5.25	4.13	3.44	1.67	3.47	1.59	4.58	8.9	4.05	6.72	5.93	8.99	7.95	1.85	3.09	0.16	2.58	9.49
ENSG00000070610|GBA2	72.66	61.54	113.33	59.33	126.45	113.96	117.65	94.26	107.06	83.11	101.47	94.39	85.13	92.48	118.04	103.79	70.6	122.16	87.11	96.63	107.38	104.72	108.3	135.71	124.99	101.88	131.98	115.15	117.71	129.7	104.88	115.24	165.35	117.91	124.88	125.45
ENSG00000070614|NDST1	37.6	39.68	53.33	53.73	50.78	48.75	46.43	36.5	40.72	47.86	43.57	52.81	46.35	45.95	49.05	52.26	16.7	41.89	53.21	57.58	47.43	48.8	50.59	42	39.3	47.9	40.52	44.96	52.25	46.72	50.07	53.69	55.08	40.54	48.83	46.32
ENSG00000070669|ASNS	101.95	111.83	138.72	99.43	161.9	186.06	124.93	142.33	128.51	74.86	155.88	148.24	83.99	150.8	161.3	588.92	653.27	493.16	82.32	142.96	176.71	116.61	113.66	250.36	556.35	523.02	563.87	62.67	62.45	172.12	90.82	75.67	227.47	518.64	488.24	571.33
ENSG00000070718|AP3M2	38.28	32.83	63.57	41.98	62.97	64.14	60.7	58.68	60.94	35.55	53.56	58.7	38.98	48.4	61.02	39.49	29.68	55.27	39.49	45.53	61.43	33.91	41.96	56.12	34.75	51.09	57.02	36.88	38.95	55.68	36.42	37.29	55.03	34.35	35.33	51.96
ENSG00000070729|CNGB1	0.68	0.67	10.54	0.83	27.59	7.82	19.1	6.89	7.11	0.89	0	0.72	0	0.18	0	0	0	0	0	0.12	0.39	0	0	0	0.19	0	0	0.48	1.58	23.6	0	0	0.07	0	0	0
ENSG00000070731|ST6GALNAC2	0	0	0.6	0	0	0	0.74	0	0	0.95	0	0	0	0	0	0	1.27	0	0	0	0	0.13	0.91	0	0	0	0	1.48	1.52	0.89	0.44	0	0	0	0	0
ENSG00000070748|CHAT	0.39	0.17	1.33	0.2	0	1.92	0.75	1.02	0.93	0	0	1.13	0	0	0.47	0	0	0	0.12	0.22	0.48	0	0	0	0.23	0	0.12	0	0	0	0	0	0	0	0.24	0
ENSG00000070756|PABPC1	597.16	775.16	407.91	785.47	431.76	426.71	491.85	445.19	563.47	447.71	342	493.11	440.56	376.6	567.74	596.96	582.41	597.24	526.84	397.89	468.18	572.9	515.85	467.16	682.03	580.58	577.8	533.49	530.53	401.3	496.51	512.87	408.21	629.9	600.76	571.01
ENSG00000070759|TESK2	0.55	1.23	0.56	0.65	0.23	0.19	0.73	0.28	0.72	0.38	0.62	0.2	0.9	0.43	0.56	0.09	0.14	0.64	0.73	0.7	0.87	0.91	0.78	0.11	0.18	0.41	0.96	0.43	0.5	1.57	0.72	0.6	0.98	2.77	0.36	0.8
ENSG00000070761|CFAP20	78.96	108.53	89.6	97.86	121.28	92.59	93.53	123.15	111.51	104.74	104.51	83.32	101.02	111.34	101.45	80.01	85.7	107.35	100.62	112.75	81.37	110.86	85.56	109.54	73.53	69.37	116.48	84.29	106.97	110.23	85.32	97.51	131.69	104.7	71.64	94.7
ENSG00000070770|CSNK2A2	68.7	72.71	79.41	74.53	73.53	73.55	77.39	56.68	88.65	63.68	76.86	83.97	67.65	74.81	81.83	100.67	62.22	102.54	66.25	70.08	77.56	71.95	77.44	85.01	104.31	93.75	88.19	80.57	77.38	75.97	77.42	76.09	74.43	101.39	105.03	92.32
ENSG00000070778|PTPN21	17.21	19.28	15.86	19.37	12.57	12.92	14.1	15.65	16.69	20.91	18.37	11.69	20.35	15.89	11.21	25.11	10.51	16.09	22.48	19.17	11.84	18.95	23.71	17.3	22.94	22.17	18.06	27.85	39.81	28.48	23.55	20.6	26.86	24.21	21.52	18.55
ENSG00000070785|EIF2B3	23.35	25.77	40.24	28.12	27.73	28.99	29.06	32.3	28.41	34.03	43.13	46.94	26.81	36.49	33.9	21.07	32.63	38	28.12	35.71	43.86	21.72	27.27	35.57	26.39	20.46	40.65	23.79	25.01	27.22	23.44	25.09	27.26	41.8	27	38.06
ENSG00000070808|CAMK2A	3.82	2.58	34.54	2.62	31.58	26.65	21.78	11.88	22.35	2.05	3.28	7.05	2.4	3.47	5.55	0.95	0.79	3.82	2.3	4.92	9.42	2.27	3.45	1.22	0.62	0.68	2.04	0.74	1.51	1.33	0.2	0.8	0.67	0.34	0.4	2.19
ENSG00000070814|TCOF1	35	35.89	32.53	39.64	29.29	25.93	27.15	18.95	27.29	31.84	29.16	29.75	25.65	27.29	28.4	23.92	22.05	31.56	33.23	33.49	28.24	23.87	26.35	34.5	25.18	26.07	32.71	23.44	24.04	30.8	24.98	25.81	32.58	23.88	22.66	37.27
ENSG00000070831|CDC42	188.6	166.35	483.88	182.92	492.67	479.26	385.84	423.16	283.97	226.92	358.29	477.46	256.3	338.19	507.36	232.1	168.35	435.09	203.22	298.95	480.19	279.17	310.27	486.96	233.21	228.27	425.36	274.43	332.5	477.1	285.07	277.63	422.16	220.12	234.56	375.46
ENSG00000070882|OSBPL3	3.98	6.51	0.91	4.14	0.8	1.32	1.23	2.29	4.86	1.7	1.74	5.1	2.21	3.36	7.82	3.56	4.51	7.14	2.56	4.04	4.63	5.8	3.21	6.09	2.35	2.4	6.2	3.12	3.88	7.5	2.57	2.02	7.71	2.29	3.13	4.81
ENSG00000070886|EPHA8	0	0	3.42	0.15	3.75	2.66	2.45	1.64	0.48	0	0	0.64	0	0	0.14	0	0.04	1.21	0.15	0	0.46	0	0	0.17	0	0.1	0.6	0.31	0.49	6.87	0.04	0.16	0	0	0.05	0.23
ENSG00000070915|SLC12A3	0	0.1	0	0	0	0	0.06	0	0	0	0	0.1	0	0	0	0	0	0	0	0	0	0	0.05	0.09	0	0	0	0	0	0	0	0	0	0	0	0.16
ENSG00000070950|RAD18	22.03	21.26	11.12	19.4	13.08	8.28	8.25	18.23	16.79	24.81	13.13	7.15	17.95	11.98	8.99	20.75	7.73	10.89	14.34	14.05	8.19	21.64	24.74	10.72	14.14	19.22	7.5	22.61	18.69	7.72	26.64	20.73	9.53	9.25	14.07	14.78
ENSG00000070961|ATP2B1	52.26	35.24	65.7	47.64	86.13	61.01	66.9	54.45	50.27	34.08	40.76	38.79	37.71	35.8	31.29	34.13	13.52	39.11	44	38.07	35.05	30.54	36.74	36.48	36.09	27.23	49.55	36.88	46.6	36.19	24.97	30.09	17.26	46.47	32.81	41.04
ENSG00000070985|TRPM5	0.07	0	0	0	0	0	0	0.08	0.07	0	0.07	0	0	0	0	0	0	0	0	0	0.06	0	0	0	0	0	0	0.07	0	0	0	0	0	0	0	0
ENSG00000071051|NCK2	50.22	47.16	49.67	41.96	61.53	56.74	64.74	39.86	59.13	48.2	74.68	85	45.28	73.21	93.37	50.42	28.46	95.33	42.66	64.55	70.59	48.17	50.19	101.87	52.23	42.9	107.44	51.22	56.13	92.7	55.66	52.69	99.57	56.83	38.42	92.25
ENSG00000071054|MAP4K4	326.4	276.88	309.11	241.18	280.78	282.77	370.62	316.03	372.89	297.97	297.25	294.05	298.29	288.96	281.84	308.08	167.95	362.7	318.54	299.79	309.42	281.55	334.43	277.39	310.26	300.58	312.83	397.51	391.99	322.74	426.86	412.3	345.09	342.14	339.87	333.93
ENSG00000071073|MGAT4A	4.86	11.44	16.77	6.03	41.74	16.11	8.26	10.18	12.88	3.43	4.18	7.93	3.01	5.94	7.59	2.42	2.11	6.48	2.7	2.73	6.04	3.24	6.05	8.2	3.48	6.08	4.09	4.12	3.88	4.23	1.67	4.06	3.6	3.28	2.22	3.94
ENSG00000071082|RPL31	2527.86	3210.62	1507.63	2580.01	1263.42	1540.38	1663.05	2319.07	1948.02	2795.51	2134.86	2589.23	2346.15	2318.58	2385.09	1968.6	3268.65	2109.82	2356.92	1867.83	2189.15	2024.05	1925.11	1705.36	1913.1	2152.68	2321.14	2030.79	2106.11	1620.05	1945.93	2135.3	1320.5	2164	2405.36	1852.18
ENSG00000071127|WDR1	59.56	68.56	60.56	66.33	56.02	65.39	61.67	70.72	70	76.8	93.73	57.24	91.79	79.93	53.1	112.89	121.17	91.59	80.05	74.96	52.69	128.31	115.07	85.79	97.15	95.35	85.07	123.94	108.25	94.89	111.6	104.03	81.18	97.63	94.62	91
ENSG00000071189|SNX13	34.76	40.88	35.01	38.52	33.76	29.89	32.73	34.7	30.62	31.13	24.59	33.35	36.72	28.23	30.69	47.3	16.24	34.54	35.54	33.21	38.49	30.52	31.77	25.09	40.92	41.88	29.21	37.38	40.53	33.55	34.05	34.11	28.26	39.73	38.82	31.42
ENSG00000071203|MS4A12	0	0	0	0	0	0	0	0	0	0	0	0	0	0	0	0	0	0	0	0	0	0	0	0	0	0	0	0	0	0	0	0	0	0	0	0
ENSG00000071205|ARHGAP10	0.63	0.94	0.17	1.07	0.52	0.64	1.12	1.02	0.24	0.24	0.26	0.17	0.4	0.15	0.26	0	0.1	0	0.14	0.19	0.29	0.08	0.13	0.32	0.15	0.86	0.26	0.77	0.31	1.57	0.12	0.91	0.18	0.33	0.16	0.44
ENSG00000071242|RPS6KA2	23.53	20.35	44.32	19.18	46.22	38.91	41.09	29.36	41.7	19.62	27.23	37.57	20.87	27.86	36.94	34.65	14.78	31.28	19.36	24.4	39.16	15.39	17.02	21.42	36.29	32.92	32.22	19.98	22.16	19.62	19.54	21.5	20	37.76	34.91	31.85
ENSG00000071243|ING3	51.27	58.31	29.92	46.57	30.28	31.45	27.97	45.95	37.76	46.62	46.91	22.85	53.73	43.22	32.2	89.52	73.84	61.25	49.95	48.42	32.59	64.11	54.15	41.64	70.54	76.48	42.51	88.43	81.89	59.87	66.48	70.23	46.98	80.47	88.58	58.29
ENSG00000071246|VASH1	52.5	47.77	91.5	54	82.1	88.29	83.94	75.54	78.23	88.99	121.67	112.2	93	117.38	107.79	82.42	46	111.65	93.57	116.08	109.6	81.45	98.55	122.46	70	56.45	102.59	119.78	125.52	104.93	139.57	128.09	133.26	80.61	60.36	111.9
ENSG00000071282|LMCD1	4.71	5.47	1.51	3.96	0.08	1.23	3.53	1.28	2.41	3.62	2.85	0	6.78	3.85	0	6.59	3.39	0.04	3.14	0.91	0.41	5.22	6.36	0.09	6.89	9.56	0.18	1.65	3.64	1.12	0.81	1.71	0.86	5.69	6.5	0.83
ENSG00000071462|BUD23	75.16	79.19	81.28	89.86	65.2	73.94	67.24	76.07	72.51	68.66	66.38	64.99	76.91	75.76	71.09	75.11	91.73	82.04	77.39	78.81	66.07	81.25	75.24	86.23	75.72	85.97	93.42	92.87	82.79	93.73	78.48	69.36	63.7	80.24	84.25	90.55
ENSG00000071537|SEL1L	31.67	27.53	55.29	32.34	46.67	44.32	43.78	41.02	32.07	27.72	35.71	50.98	32.19	32.66	47.05	107.67	37.01	76.14	32.33	36.96	49.34	29.67	31.71	39.71	167.17	159.09	68.09	43.93	39.6	46.85	34.23	34.09	37.57	137.3	171.36	62.13
ENSG00000071539|TRIP13	29.14	16.99	3.96	18.91	2.85	2.55	2.68	22.17	14.6	16.12	9.7	3.43	17.55	8.3	1.52	11.12	9.44	7.27	19.84	10.16	2.33	19.11	19.56	2.52	8.34	11.96	6.93	22.45	12.14	5.67	22.08	27.6	3.12	6.74	8.2	3.76
ENSG00000071553|ATP6AP1	62.47	64.02	156.2	73.6	171.41	155.17	142.19	126.38	108.29	82.35	95.77	146.68	83.18	101.95	145.51	79.97	80.39	96.62	80.33	107.42	151.25	78.81	73.89	100.51	87.81	101.58	108.86	75.72	86.72	108.35	71.17	79.36	90.62	94.28	104.04	96.05
ENSG00000071564|TCF3	244.28	242.94	65.85	318.98	47.32	60.86	118.05	102.55	158.01	274.11	183.79	80.5	250.07	148.69	67.52	200.72	181.65	92.12	323.31	153.11	75.78	237.45	194.39	112.28	196.06	176.86	102.3	220.62	192.35	98.46	247.13	215.71	137.39	207.47	176.47	94.63
ENSG00000071575|TRIB2	111.56	99.81	128.91	104.67	167.97	115.11	106.89	108.01	117.37	117.23	85.83	35.65	120.55	78.57	24.13	142.3	98.67	109.09	131.93	94.24	42.34	95.16	83.15	69.02	137.24	127.4	126.72	90.94	110.19	71.48	82.64	93.43	32.32	126.68	109.69	125.36
ENSG00000071626|DAZAP1	78.29	85.68	75.71	82.6	90.65	67.14	94.66	47.92	88.07	75.49	92.29	87.76	91.47	86.95	85.07	81.92	65.02	92.29	89.78	97.65	82.01	79.28	78.12	78.71	95.87	76.25	95.97	101.11	81.24	93.66	90.23	88.57	72.37	87.81	87.34	84.22
ENSG00000071655|MBD3	97.5	89.54	68.47	91.47	65.04	72.95	89.25	54.08	88.02	102.5	91.3	74.24	105.98	93.87	79.28	84.79	97.57	83.6	102.45	87.44	77.4	104.1	97.45	83.65	89.34	89.47	93.75	105.34	89.87	99.58	103.79	102.84	88.54	107.13	97.53	91.18
ENSG00000071677|PRLH	0	0	0	0	0	0	0	0	0	0	0	0	0	0	0	0	0	0	0	0	0	0	0	0	0	0	0	0	0	0	0	0	0	0	0	0
ENSG00000071794|HLTF	55.8	48.39	72.5	54.79	87.79	73.17	64.7	67.76	58.11	49.22	56.38	60.75	50.46	42.08	46.34	57.07	30.92	61.48	53.73	52.15	58.99	62.78	69.53	68.8	49.86	51.77	49.09	70.88	60.17	85.86	65.43	58.57	73.74	45.5	40.94	61.19
ENSG00000071859|FAM50A	83.46	94.22	103.61	79.42	92.36	90.82	95.24	69.09	110.57	104.82	108.61	118.45	91.03	112.52	118.26	90.03	185.33	110.82	117.65	117.34	122.19	107.52	115.62	137.63	99.23	122.65	112.1	68.9	82.68	106.6	99.34	97.65	115.23	107.64	116.36	119.51
ENSG00000071889|FAM3A	30.84	27.77	29.74	27.77	31.03	29.57	28.35	24.23	26.54	30.03	24.49	34.54	29.34	25.95	31.03	27.24	47.66	24.43	24.78	25.1	28.13	27.7	24.74	33.6	33.17	33.11	30.84	25.61	29.57	26.74	24.46	22.47	34.67	28.6	37.21	24.96
ENSG00000071894|CPSF1	146.3	160.69	100.63	143.28	114.93	113.02	96.44	65.51	152.09	171.81	107.03	89.42	163.7	120.23	126.05	144.67	261.44	142.86	164.76	129.23	96.94	180.66	149.29	152.02	147.87	144.32	135.87	139.97	138.21	112.94	178.62	179.17	149.08	160.9	145.44	152.06
ENSG00000071909|MYO3B	0	0.32	0.05	0	0.41	0.63	0.45	0.25	0.21	0.04	0.06	0.07	0	0.06	0.06	0	0	0.08	0	0	0	0.07	0.23	0.05	0.08	0.19	0	0.31	0.39	0.95	0.08	0.19	0	0.1	0	0
ENSG00000071967|CYBRD1	11.29	12.72	2.06	12.03	0.09	0.4	2.13	3.95	7.14	12.8	5.31	1.88	11.75	6.09	2.86	15.61	11.46	2.7	9.66	5.27	0.4	16.62	16	5.38	13.14	22.21	0.46	15.2	15.64	2.23	16.73	17.21	1.42	7.67	12.24	1.09
ENSG00000071991|CDH19	0.03	0.35	0.38	0	0.22	0.04	0.2	0.04	0.04	0	0	0.04	0	0	0.04	0	0.15	0	0	0	0.04	0	0	0	0.18	0.17	0	0	0	0	0	0	0	0.3	0.47	0
ENSG00000071994|PDCD2	58.92	63.69	69.78	65.34	67.89	63.87	70.81	63.94	59.8	63.6	70.34	66.2	62.61	77.02	77.57	65.69	61.65	77.17	64.11	71.34	81.06	52.88	50.43	81.46	69.28	56.64	79.61	51.98	59.33	68.58	48.76	55.49	63.4	62.38	58.04	70.95
ENSG00000072041|SLC6A15	39.92	34.78	74.82	40.88	57.72	56.04	50.97	65.3	42.73	31	44.68	68.35	36.91	45.46	66.08	26.26	14.62	64.95	37.09	47.87	63.74	16.27	14.64	43.46	20.22	23.71	69.06	2.23	4.03	32.47	3.31	1.3	20.64	17.87	10.63	54.35
ENSG00000072042|RDH11	117.27	104.43	141.84	115.95	130.75	150.15	131.06	156.79	114.51	130.05	128.17	116.21	140.96	128.55	116.7	127.15	146.59	115.22	129.49	137.17	134.24	138.92	138.18	115.67	116.95	133.35	111.29	107.71	128.4	107.85	114.71	100.7	106.13	105.89	106.99	118.4
ENSG00000072062|PRKACA	56.43	45.93	90.15	58.01	109.24	82.04	69.8	48.44	59.36	62.8	72.17	65.63	52.77	63.53	65.42	49.33	23.44	60.76	52.26	63.57	65.14	66.09	69.78	70.81	45.41	42.19	59.2	71.94	68.39	85.49	60.21	67.33	68.25	43.06	43.23	57.92
ENSG00000072071|ADGRL1	62.72	68.85	131.38	88.27	143.49	126.7	131.63	46.57	118.97	62.74	108.3	136.21	70.37	98.15	135.81	80.4	39.34	110.52	71.72	120.53	149.09	59.06	73.42	85.14	52.57	50.62	107.4	50.64	74.59	90.58	64.35	71.04	96.93	71.44	45	96.95
ENSG00000072080|SPP2	3.16	3.04	0	4.17	0	3.43	2.91	0	0	7.25	2.72	3.26	7.86	12.33	0	0	0	3.37	0	2.97	0	5.63	8.64	3.57	0	17.26	2.68	17.05	0	8.88	4.52	2.86	8.8	21.27	0	3.67
ENSG00000072110|ACTN1	29.07	26.98	11.43	36.92	16.76	17.18	15.76	18.11	19.04	25.49	18.18	13.6	24.28	19.45	14.02	44.01	21.53	33.96	42.35	21.99	19.57	54.78	40.73	25.14	45.71	57.41	35.22	24.5	25.2	21.57	40.15	33.4	26.91	40.71	38.57	33.58
ENSG00000072121|ZFYVE26	13.16	11.65	17.73	11.58	21.81	16.66	19.97	15.03	11.7	17.58	12.74	15.64	16.5	13.37	12.71	21.95	23.95	23.98	18.58	13.82	16.7	18.6	21.48	18.01	22.91	23.89	19.37	28.01	24.09	18.61	24.87	19.55	20.82	24.2	24.6	19.1
ENSG00000072133|RPS6KA6	9.08	12.37	15.36	10.62	19.59	16.26	16.63	15.44	14.9	7.22	10.5	16.28	11.76	11.31	13.92	10.26	4.1	13.51	9	10.44	15.57	8.94	9.15	10.08	11.31	15.17	12.09	5.76	6.08	7.35	6.53	5.66	9.43	8.88	8.88	10.34
ENSG00000072134|EPN2	34.82	23.8	39.45	48.33	54.95	35.57	36.32	38.51	26.74	25.12	41.25	37.92	28.12	32.55	37.31	39.83	24.01	37.06	26.4	31.77	37.78	31.41	31.91	29	31.44	33.35	35.61	51.37	64.21	33.81	60.54	63.52	45.62	29.97	31.04	34.65
ENSG00000072135|PTPN18	41.35	47.54	41.72	37.47	56.88	61.68	43.52	22.41	52.2	49.64	40.99	51.12	50.93	52.28	54.72	26.08	15.74	44.25	47.38	55.58	44.24	43.28	56.23	86.04	33.73	33.74	45.16	29.81	32.81	58.82	39.52	36.22	80.38	32.2	29.11	52.06
ENSG00000072163|LIMS2	0.79	0.35	0.54	0.54	0	0.06	0.38	0	0.48	0	0	0.45	0	0	0.1	0	0	0	0	0	0	0	0.59	0.18	0	0	0.75	1.28	2.87	0.4	1.32	3.23	0	0.83	0.39	0
ENSG00000072182|ASIC4	1.01	1.61	4.64	0.26	9.14	9.3	4.34	2.91	2.59	0.26	0.86	0.26	0.34	0	0.29	0.92	0.16	1.07	0.09	0.1	0.07	0.45	0.58	1.08	0.84	1.13	1.06	3.3	5.45	10.53	3.58	3.17	0.5	0.72	1	0.77
ENSG00000072195|SPEG	49.18	53.49	94.64	47.69	88.67	103.06	99.66	47.85	84.06	56.03	107.73	143.28	63.75	93.82	119.48	62.85	44.11	88.27	56.57	94.91	112.47	56.54	71.31	115.64	70.66	50.21	93.75	42.19	58.23	64.73	52.08	67.86	73.48	56.56	56.63	90.44
ENSG00000072201|LNX1	1.54	1.21	6.75	1.64	2.91	3.86	3.84	6.99	3.04	1.22	9.31	10.1	3.15	7.92	11.49	3.13	5	13.8	1.48	3.83	6.4	2.31	8.09	23.65	3.61	3.39	8.77	2.2	5.2	26.5	5.41	3.61	39.46	2.8	2.89	13.84
ENSG00000072210|ALDH3A2	65.9	60.68	67.42	76.9	48.94	55.58	62.43	61.48	64.73	66.77	84.3	44.68	81.41	68.94	48.03	104.6	63.28	82.82	81.37	71.86	48.86	80.96	91.92	85.93	105.47	113.88	85.82	107.84	101.73	99.88	112.47	102.8	141	92.12	92.84	98.11
ENSG00000072274|TFRC	72.51	131.36	45.22	93.62	66.23	64.51	56.82	66.22	76.16	56.66	54.74	33.91	69.76	52.73	32.64	94.68	51.58	64.53	62.14	59.93	39.25	101.73	102.65	54.75	93.11	83.98	70.12	141.34	101.72	76.1	129.57	125.71	73.87	81.75	108.2	73.93
ENSG00000072310|SREBF1	89.27	78.3	41.63	65.08	29.14	36.99	38.89	47.65	59.64	93.95	73.95	63.9	111.59	75.37	53.47	53.36	31.49	39.21	105.63	76.72	76.15	95.53	78.53	39.25	54.26	36.84	33.87	76.71	33.54	33.16	53.44	56.28	45.59	53.19	40.27	37.89
ENSG00000072315|TRPC5	0	0.13	1.23	0.08	1.93	1.18	0.53	0.33	0.17	0.04	0.13	0.15	0	0	0.04	0	0.06	1.21	0	0	0.31	0	0.07	0.19	0.04	0.08	0.65	0.21	0.04	0.34	0.17	0.13	0.19	0.09	0.13	0.53
ENSG00000072364|AFF4	82.8	75.69	108.09	75.34	105.82	107.91	106.47	104.78	94.39	71.16	107.78	86.58	91.63	90.01	87.12	132.35	45.75	129.91	83.44	93.26	98.41	98.95	118.29	110.67	114.89	102.27	105.9	97.98	107.46	105.48	106.3	108.4	113.24	116.48	105.14	111.04
ENSG00000072401|UBE2D1	38.97	38.98	67.59	32.3	69.06	82	84.05	80.03	50.5	41.96	65.75	58.23	57.43	63.87	67.96	69.49	47.16	77.46	41.74	67.44	64.54	62.88	61.56	78.32	54.31	51.06	57.45	51.37	58.89	75.06	60.56	49.71	83.77	57.66	48.18	67.86
ENSG00000072415|MPP5	34.16	32.74	10.63	39.99	12.42	11.67	12.48	24.5	23.52	31.94	12.98	7.47	31.56	16.54	8.65	34.84	18.6	9.09	30.77	16.69	10.75	32.65	30.34	8.75	30.56	28.2	9.03	31.13	32.58	12.42	27.63	30.13	11.82	14.69	19.23	10.66
ENSG00000072422|RHOBTB1	21.2	24.95	13.01	15.69	16.85	24.06	13.71	14.82	12.85	17.31	8.1	4.97	20.3	8.99	6.03	15.58	9.16	8.85	16.32	9.77	4.96	39.48	22.32	11.75	15.3	14.74	10.69	23.05	16.38	27.14	16.08	19.7	25.3	23.4	14.6	11.55
ENSG00000072501|SMC1A	60.03	73.32	55.17	70.08	56.42	45.05	52.58	54.44	61.44	63.87	43.11	46.59	52.83	46.61	36.64	45.78	20.09	48.05	57.1	63.05	47.05	60.67	50.11	33.66	33.91	47.79	37.02	52.92	50.43	39.38	62.93	65.83	40.9	37.15	47.2	38.1
ENSG00000072506|HSD17B10	59.21	48.89	78.93	58.43	34.62	51.13	59.78	70.76	58.93	59.11	81.22	78.99	64.17	88.53	77.09	47.32	95.98	53.47	71.21	82.35	108.2	53.53	61.93	65.61	52.54	48.98	57.08	81.34	89.91	72.8	86.32	79.47	67.1	63.06	65.25	63.52
ENSG00000072518|MARK2	20.46	19.07	36.04	24.61	28.56	25.58	25.3	15.27	27.9	17.55	25.63	30.68	24.4	25.48	25.01	26.38	8.28	25.48	26.41	26.86	36.84	21.86	22.51	28.13	32.31	23	33.4	26.41	28.02	28.78	30.68	28.65	31.53	29.27	30.68	36.42
ENSG00000072571|HMMR	28.05	48.9	1.26	36.09	0.52	3.28	2.11	8.67	16.07	14.91	6.26	0.63	13.22	4.9	0.12	10.58	8.87	0.66	15.61	8.53	0.86	19.36	14.99	0.44	9.22	12.77	1.8	14.59	12.15	2.84	18.44	24.53	1.63	4.85	7.7	0.24
ENSG00000072609|CHFR	28.76	27.61	64.19	35.79	60.61	65.73	61.09	45.65	50.55	31.51	52.57	60.71	52.01	51.05	57.8	43.66	27.96	49.76	45.53	53.59	59.25	34.71	34.84	50.95	45.96	41.08	58.55	42.7	51.28	45.2	45.79	50.35	48.91	47.81	45.05	50.09
ENSG00000072657|TRHDE	0.16	0.42	1.47	0	5.54	2.3	0.92	0.22	4.62	0	0	0	0.04	0	0	0.04	0	0	0	0.02	0.02	0	0.02	0.02	0.05	0.02	0	0.56	0.84	1.34	0.75	0	0	0	0	0
ENSG00000072682|P4HA2	12.36	17.76	7.96	11.13	10.84	13.11	4.56	7.6	4.8	4.98	5.89	11.5	6.86	11.61	5.8	25.81	36.86	11.46	14.15	7.69	4.38	16.25	10.63	19.79	40.4	56.43	12.57	3	3.8	9.38	8.1	4.23	18.03	27.36	33.46	7.06
ENSG00000072694|FCGR2B	0	0	0	0	0	0	0	0	0	0	0	0	0	0	0	0	0.18	0	0	0	0	0	0	0	0	0	0	0	0	0	0	0	0	0	0	0
ENSG00000072736|NFATC3	24.92	26.77	7.57	28.25	10.37	8.29	8.73	11.26	16.49	23.99	16.59	8.67	23.12	17.45	10.89	21.24	13.99	12.95	27.02	17.33	10.2	23.05	22.15	8.99	22.93	19.2	9.01	31.98	23.55	13.56	23.63	22.48	14.96	17.27	25.14	10.66
ENSG00000072756|TRNT1	39.68	28.63	38.2	32.46	25.79	32.48	24.16	28.83	29.4	27.26	32.99	26.54	27.76	33.14	35.31	35.67	31.6	43.2	29.93	34.58	33.88	28.45	30.42	36.88	41.09	43.5	44.92	31.55	32.89	41.06	27.35	24.92	32.44	39.88	38.11	43.96
ENSG00000072778|ACADVL	169.06	207.07	189.94	226.49	266.11	238.41	211.46	166.69	195.97	180.65	173.24	186.44	204.77	172.3	180.7	301.44	342.46	285.09	209.1	191.5	191.49	296.07	289.72	286.7	443.08	424.07	295.55	229.12	234.85	288.01	309.05	292.38	420.71	353.39	378.78	310.99
ENSG00000072786|STK10	7.59	11.58	11.99	4.55	18.39	9	12.16	7.33	12.27	4.72	10.41	26.71	8.7	16.5	32.66	11.87	4.06	11.46	6.08	15.75	21.57	9.61	9.22	15.31	5.85	4.95	11.75	6.49	10.8	9.83	13.3	11.06	20.19	9.37	5.99	10.76
ENSG00000072803|FBXW11	51.19	58.74	99.7	59.19	92.89	97.82	74.55	77.36	77.56	60.83	73.59	92.17	61.13	75.08	100.8	83.58	37.51	104.45	59.32	69.73	87.98	63.35	63.71	72.37	83.49	75.88	84.39	69.2	76.86	83.87	67.24	67.98	65.22	68.92	71.02	82.93
ENSG00000072818|ACAP1	2.29	2.15	3.29	5.07	3.49	10.66	25.97	1	3.93	0.98	1.17	13.18	1.04	1.48	1.8	1.48	0.95	2.59	1.21	1.27	5.6	6.93	9.57	4.5	1.11	1.51	11.94	0.4	0.15	3.32	1.02	1.48	28.96	7.87	0.77	1.28
ENSG00000072832|CRMP1	281.93	221.25	914.2	235.64	828.67	874.18	888.13	679.58	661.27	315.65	701.22	865.71	350.49	685.74	807.62	290.29	300.39	645.66	315.83	647.34	873.75	284.78	359.15	696.48	307.47	252.03	675.03	351.56	436.64	666.74	397.62	423.79	719.93	336.58	280.87	616.76
ENSG00000072840|EVC	7.29	7.9	1.19	10.07	1.14	1.49	4.08	2.71	3.7	7.24	4.82	2.22	6.78	4.1	2.87	10.83	0.99	4.44	8.84	7.62	2.06	8.36	8.85	4.1	6.45	9.31	3.54	9.54	6.35	5.38	8.49	8.72	2.68	7.35	7.38	1.71
ENSG00000072849|DERL2	69.55	59.09	39.91	67.16	49.24	47.06	46.22	67.98	54.19	46.55	42.83	36.78	53.87	41.6	32.02	86.72	60.26	64.29	66.37	55.43	39.67	63.56	54.6	50.66	88.95	104.88	67.12	72.24	63.23	56.08	62.27	63.36	44.16	84.8	81.49	63.37
ENSG00000072858|SIDT1	0.91	0.16	1.36	0.04	1.35	2.34	0.92	0.43	0.2	0.13	0.82	1.12	0.22	0.73	2.06	0.18	0.69	0.83	0.43	0.05	0.39	0	0.84	0.42	0.22	0.14	0.38	0.05	0.29	1.43	0.24	0.45	0.33	0.2	1.16	0.85
ENSG00000072864|NDE1	52.07	79.2	3.34	59.02	2.64	5.28	6.68	19.54	27.32	43.82	22.51	7.84	47	29.44	10.43	41.56	22.46	4.28	53.48	30.57	6.97	61.13	61.56	7.85	39.74	42.65	4.29	55.88	42.15	7.49	75.08	60.07	14.5	26.87	47.28	7.41
ENSG00000072952|MRVI1	1.68	2.57	0.92	2.05	1.38	1.76	1.99	1.18	2.68	0.96	0.72	0.6	0.75	0.9	0.46	0.63	0.12	1.16	0.72	0.31	0.53	0.86	0.83	0.93	0.67	0.57	0.73	0.68	0.67	2.01	0.38	0.21	0.43	0.31	0.22	0.61
ENSG00000072954|TMEM38A	4.66	7.64	12.16	8.38	11.86	11.96	9.47	8.01	8.79	5.91	7.74	8.74	6.08	9.03	8.63	6.2	4.04	8.5	5.07	7.14	7.89	7.39	7.27	9.66	5.68	8.42	8.58	5.46	4.69	11.22	3.71	4.57	10.95	4.31	4.73	7.35
ENSG00000072958|AP1M1	56	51.25	83.63	64.38	83.11	90.6	85.35	66.79	82.55	56.5	70.36	85.39	55.55	67.48	72.26	48.79	41.37	62.67	57.58	63.01	80.19	54.54	50.65	58.88	54.58	45.01	63.62	55.55	53.45	56.31	70.54	57.01	51.71	44	50.36	57.61
ENSG00000073008|PVR	18.91	14.86	29.93	14.71	22.62	25.74	26.3	14.11	24.57	9.06	20.17	27	10.03	18.01	30.95	11.56	5.99	36.86	11.63	19.97	27.88	14.12	17.12	25.63	7.91	12.14	24.77	9.32	19.44	24.02	14.04	11.83	27.79	13.73	13.8	24.62
ENSG00000073050|XRCC1	54.1	69.04	40.94	63.8	51.8	35.9	38.49	37.36	45.11	63.17	46.71	30.79	48.71	44.22	38.64	41.79	48.24	37.32	50.12	41.42	41.11	52.11	42.29	40.52	48.16	54.82	40.29	40.84	38.88	38.08	48.55	46.47	40.56	45.42	47.34	49.85
ENSG00000073060|SCARB1	15.86	29.25	27.96	24.9	14.31	22.17	19.55	18.12	20.47	32.11	41.94	53.81	30.93	32	52.16	19.43	12.61	17.38	26.47	41	39.33	18.87	19.79	21.62	18.7	20.23	23.19	29.33	14.45	19.29	15.69	23.25	19.82	15.84	10.52	17.05
ENSG00000073067|CYP2W1	0.32	0.09	1.63	0.21	1.88	0.51	2.86	0	0.23	0	0.11	0	0	0.24	0.51	0.68	0	1.51	0.11	3.25	1.32	0.11	1.41	0.51	0.45	1.06	0	0.23	0.12	1.14	0.09	0.57	0.13	0.36	1.45	0.21
ENSG00000073111|MCM2	157.94	131.1	10.04	162.93	7.7	11.84	14.69	23.54	52.66	125.51	37.38	10.26	119.31	44.69	7.8	46.93	51.83	6.01	130.17	54.73	10.73	96.68	77.73	6.67	26.96	41.73	7.86	92.7	58.26	10.14	84.7	83.38	6.77	19.56	31.46	10.2
ENSG00000073146|MOV10L1	0.47	0.85	0.57	0.74	1.46	0.87	0.38	0.43	0.66	1.17	0.45	0.08	1.17	0	0.67	0.8	1.48	0.62	0.77	0.54	0.39	3.01	0.69	0	1.04	0.7	0.19	0.27	1.09	0.74	0.89	1.05	0.44	1.22	0.73	0.15
ENSG00000073150|PANX2	2.71	3.56	6.65	4.22	12.16	9.96	6.33	2.1	5.92	3.51	4.83	4.42	3.31	5.82	4.25	4.11	2.09	5.95	3.32	3.58	3.76	5.27	5.06	8.96	4.45	5.41	7.29	1.94	2.17	8.92	3.2	2.64	8.4	4.36	4.47	7.54
ENSG00000073169|SELENOO	21.91	20.19	21.14	20.07	24.91	27.54	18.8	14.96	27.48	22.74	27.11	21.41	17.82	24.49	25.84	20.76	29.73	26.76	21.8	26.21	24.61	29.73	24.86	36.02	32.37	27.04	28.83	24.42	24.72	44.22	26.47	33.34	31.94	26.26	28.1	28.47
ENSG00000073282|TP63	0.23	0.7	0	0.23	0.21	0.94	0.21	0	0.2	0	0	0.38	0	0.11	0.1	0.24	0	0.3	0	0	0	0	0	0.48	0.11	0	0.19	0	0	0	0	0	0.06	0	0	0
ENSG00000073331|ALPK1	19.05	16.57	20.36	20.86	6.73	17.95	31.17	42	29.56	19.86	41.99	43.84	24.62	55.14	46.24	24.42	10.03	30.38	26.26	50.54	51.47	20.57	21.02	36.74	29.21	18.91	33.71	3.17	3.39	14.82	8.26	3.41	17.93	28.19	15.83	42.05
ENSG00000073350|LLGL2	1.98	2.32	1.43	2.73	0.85	0.3	1.5	5.26	1.25	0.52	1.99	3.9	0.97	2.51	1.64	0.91	0.36	1.76	1.25	1.47	2.31	0.28	0.97	1.79	0.22	0.36	2.41	1.57	0.94	8.71	0.59	0.18	3.03	0.27	0	1.19
ENSG00000073417|PDE8A	17.62	15.56	10.76	18.26	20.54	13.55	14.93	6.56	19.48	17.55	6.4	3.99	15.39	9.91	2.15	30.25	16.64	10.96	13.63	7.45	3.34	28.25	27.94	12.34	37.26	36.68	9.22	14.98	15.06	7.5	21.57	25.41	3.91	26.68	40.5	9.55
ENSG00000073464|CLCN4	4.72	3.74	68.13	4.43	47.92	51.33	47.26	43.77	30.89	3.08	37.05	75.41	6.03	30.22	63.44	2	2.54	43.61	3.95	27.15	59.28	7.08	6.21	29.75	2.33	2.98	28.88	5.98	5.37	25.34	2.7	4.3	15.78	4.45	3.2	17.04
ENSG00000073536|NLE1	18.55	14.43	25.48	16.22	22.29	22.07	18.24	15.59	18.69	13.79	15.74	24.99	15.73	15.63	24.41	15.78	11.32	36.81	18.58	19.27	25.11	9.59	11.15	21.92	14.86	12.97	30.26	13.78	14.28	28.05	12.27	17.89	22.5	19.08	16.94	29.99
ENSG00000073578|SDHA	98.29	93.12	122.73	85.15	114.19	114.67	97.78	73.47	90.85	94.37	88.47	85.28	97.77	84.42	102.14	105.73	101.77	105.53	100.96	105.24	91.11	121.18	99.3	87.02	113.4	91.53	100.42	106.34	100.49	116.29	110.51	111.89	97.2	126.97	89.05	93.38
ENSG00000073584|SMARCE1	208.17	188.21	214.77	210.01	273.16	219.82	255.81	238.3	237.68	193.11	185.8	153.19	191.52	180.45	131.91	193.44	149.65	150.58	193.52	196.55	163.01	170.49	177	177.95	189.43	167.26	157.69	200.68	172.38	166.81	202.12	187.12	158.5	185.17	170.17	153.97
ENSG00000073598|FNDC8	0	0	0	0.21	0	0	0	0	0	0.21	0	0	0	0	0	0	0	0	0	0	0	0	0.19	0.51	0	0	0.51	0.49	0	0.44	0.21	0.25	0.54	0	0	0.22
ENSG00000073605|GSDMB	31.49	29.42	46.28	26.77	52.8	60.62	39.63	26.51	52.09	18.62	27.19	26.46	28.33	23.62	26.52	45.97	37.1	75.4	35.19	33.97	32.26	31.04	36.53	58.15	44.04	48.79	64.56	26.75	25.72	41.2	41.11	43.06	55.22	41.32	36.79	46.82
ENSG00000073614|KDM5A	21.36	41.33	33.31	21.33	30.32	31.79	25.28	36.83	20.41	22.95	21.91	29.7	25.92	30.1	22.66	33.77	19.48	32.97	35.25	36.71	18.68	24.32	21.5	22.4	39.08	21.15	29.85	33.33	36.25	29.23	36.49	24.97	35.25	38.99	33.22	38.85
ENSG00000073670|ADAM11	3.03	3.68	11.43	3.63	7.33	9.39	3.53	3.13	4.53	2.41	3.19	12.48	2.67	3.01	12.99	4.5	3.33	9.65	2.23	3.99	9.28	5.06	4	14.89	3.97	4.93	10.18	1.53	4.36	15.05	3.91	3.51	5.98	4.34	2.87	6.64
ENSG00000073711|PPP2R3A	22.3	23.57	57.44	24.87	62.86	55.13	58.12	51.07	50.87	23.05	49.17	41.4	29.63	38.95	35.27	34.56	13.34	40.34	24.35	40.76	37.67	26.03	36.14	47.78	29	21.64	34.88	22.25	29.28	33.76	29.46	24.58	50.78	28.79	22.02	33.32
ENSG00000073712|FERMT2	47.99	60.97	22.68	51.27	17.2	24.51	18.49	31.91	34.29	63.04	41.23	35.35	55.96	39.54	30.56	109.1	60.13	70.09	61.76	48.61	29.98	96.9	86.63	51.7	108.46	102.8	69.9	83.48	94.17	51.58	78.7	77.47	48.83	84.69	85.45	55.26
ENSG00000073734|ABCB11	0.31	0.76	0.26	0.31	0.15	0.29	0.27	0.43	0.22	1.83	0.53	0.12	1.34	0.65	0.1	1.18	0.73	0.23	1.03	0.68	0.16	2.14	1.58	0.42	1	0.92	0.28	0.53	0.98	0.32	0.88	0.54	0.24	0.92	0.92	0.17
ENSG00000073737|DHRS9	0	0	0	0	0	0	0	0	0	0	0	0	0	0	0	0	0	0	0	0	0	0	0	0	0.1	0	0	0	0	0	0	0	0	0.19	0	0
ENSG00000073754|CD5L	0	0	0	0	0	0	0.12	0	0	0	0	0	0	0	0	0	0	0	0	0	0	0	0	0	0	0	0	0	0	0	0	0	0	0	0	0
ENSG00000073756|PTGS2	0	0.14	0.24	0.05	0.29	0	0	0.19	0.17	0	0.07	0.08	0	0	0	0	0	1.33	0	0.07	0.13	0	0.06	1.5	0	0.2	1.06	0	0.07	0.33	0.28	0	0	0	0	0.15
ENSG00000073792|IGF2BP2	133.69	139.71	98.62	131.05	130.04	102.94	111.7	101.05	153.77	124.67	115.98	111.95	112.35	111	107.06	86.79	64.76	75.78	123.85	112.58	105.56	81.66	69.58	75.91	77.87	64.59	94.02	15.55	14.68	40.61	11.85	12.24	24.16	35	22.77	34.61
ENSG00000073803|MAP3K13	56.26	48.67	60.01	49.46	62.71	59.08	62.3	54.49	45.5	44.94	46.45	43.8	41.97	44.02	45.91	45.52	50.57	53.82	51.21	45.15	43.42	48.76	51.05	49.92	45.2	54.29	54.74	53.74	58.68	70.35	47.45	49.2	66.92	48.02	47.93	61.97
ENSG00000073849|ST6GAL1	13.21	8.66	25.95	11.02	27	23.62	27.73	20.65	27.56	9.09	23.49	40.87	8.69	22.82	39.76	6.52	3.58	32.29	9.39	25.09	30.09	6.67	13.9	34.12	9.26	5.9	32.9	4.86	10.94	27.42	9.23	12.29	37.93	9.74	7.83	30.58
ENSG00000073861|TBX21	0.19	0.08	0	0.09	0.27	0	0	0	0	0	0	0	0	0	0	0.1	0.07	0	0	0	0	0	0	0	0	0	0.28	0.1	0.1	0.56	0.43	0.21	0.12	0.11	0	0.19
ENSG00000073910|FRY	20.12	14.87	34.69	12.53	46.7	44.15	30.9	23.76	45.53	19.74	21.84	23.12	18.32	25.83	18.91	48.93	43.6	29.09	33.15	13.09	19.63	36.56	25.34	34.97	33.26	50.34	29.54	11.19	32.56	26.62	19.55	24.66	21.47	54.91	41.85	26.74
ENSG00000073921|PICALM	126.89	131.81	228.37	134.58	211.8	221.84	212.53	202.51	175.03	143.33	194.39	209.87	147.39	166.96	226.8	169.38	104.41	229.89	142.84	159.36	210.75	144.67	159.02	169.29	153.72	155.97	215.41	144.15	162.96	181.4	160.52	164.76	198.02	149.68	155.39	206.39
ENSG00000073969|NSF	34.31	27.55	89	33.68	98.84	89.7	70.4	74.26	63.41	27.16	41.36	51.62	36.22	48.41	50.62	36.63	18.76	73.7	30.34	41.9	55.2	27.93	36	51.68	28.41	29.72	59.88	36.28	43.27	46.91	34.36	31.96	39.27	30.63	26.11	62.75
ENSG00000074047|GLI2	19.31	33.39	1.24	42.23	0.71	1.21	4.53	6.03	13.49	22.09	10.02	1.03	18.31	9.37	0.96	17.88	9.71	1.07	22.35	13.35	1.24	24.57	30	3.3	14.48	24.88	1.47	19.02	13.28	1.59	23.53	21.65	2.33	10.6	20.41	1.25
ENSG00000074054|CLASP1	58.64	58.33	93.23	71.45	96.88	86.53	81.13	76.66	83.16	59.66	75.34	69.86	63.68	80.05	73.32	67.46	24.71	112.64	59.28	75.99	85.73	62.22	76.05	83.61	73.43	64.64	95.88	86.66	130.9	83.74	79.67	117.47	88.82	70.7	60.62	82.78
ENSG00000074071|MRPS34	81.79	79.13	101.65	79.55	79.69	69.36	70.93	70.28	78.11	78.19	82.35	70.84	76.15	90.45	80.48	52.7	71.49	80.14	83.21	78.21	86.63	62.96	55.69	71.94	57.74	60.64	84.22	65.01	64.41	64.53	53.53	75.42	62.13	46.79	57.52	77.39
ENSG00000074181|NOTCH3	53.95	63.78	3.75	76.61	1.72	5.8	10.24	10.18	25.97	55.83	14.89	4.08	37.7	17.17	1.3	33.22	7.89	1.81	48.07	20.48	2.67	30.81	29.3	3.31	22.3	32.06	1.06	27.94	18.74	4.52	22.07	23.77	4.75	17.93	30.15	0.83
ENSG00000074201|CLNS1A	256.1	251.33	101.84	287.04	123.78	112.3	130.77	180.9	182.6	264.39	172.52	106.33	273.8	176.7	101.79	212	265.83	114.65	292.27	192.88	118.84	222.61	219.26	104.65	219.04	231.93	130.28	225.58	235.68	122.3	226.17	229.54	134.26	189.83	234.04	143.37
ENSG00000074211|PPP2R2C	0.94	0.43	54.52	0.77	43.31	44.16	30.74	19.26	20.4	0.22	3.54	26.9	1.03	2.86	18.28	0.87	0.22	20.81	0.17	2.34	16.61	0.9	0.52	14.17	1.01	0.36	22.94	3.15	5.58	17.5	0.36	0.31	7.8	0.26	0.18	13.7
ENSG00000074219|TEAD2	90.04	138.11	2.33	92.27	2.47	3.03	14.23	20.11	38	102.6	40.15	5.81	94.73	41.65	8.82	57.02	40.6	13.69	100.92	44.98	7.42	74.87	60.24	23.06	65.36	56.73	15.47	89.37	55.46	27.35	103.88	80.93	44.09	65.95	69.85	21.38
ENSG00000074266|EED	39.18	44.2	32.6	47.27	43.34	51.52	46.5	34.93	36.84	42.7	39.52	32.79	41.67	32.44	48.46	40.78	45.93	43.64	49.79	41.94	33.46	47.41	43.43	48.08	25.62	28.65	39.74	41.73	35.9	46.28	38.14	33.66	27.81	15.81	24.11	30.49
ENSG00000074276|CDHR2	4.51	5.19	12.69	7.62	21.67	17.65	21.45	5.44	28.57	10.83	19.45	14.27	5.85	13.58	12.91	7.5	5.8	33.16	15.75	25.06	24.21	7.82	7.4	42.97	11.76	2.84	26.13	10.87	9.03	17.5	12.27	4.72	37.71	3.72	4.33	24.82
ENSG00000074317|SNCB	10.02	4.42	125.03	6.96	52.01	82.21	69.77	97.47	35.77	17.04	169.93	154.16	41.85	240.46	145.91	15.89	52.71	189.83	18.59	162.34	160.72	7.96	30.8	169.06	20.51	15.05	159.85	4.37	5.16	87.63	3.05	3.77	77.14	15.73	7.54	150.66
ENSG00000074319|TSG101	93.51	71.63	160.2	78.68	118.54	106.82	119.09	128.77	100.4	99.41	101.59	95.1	111.6	124.47	126.5	90.53	83.33	113.57	88.16	95.26	116.18	74.03	91.95	120.34	106.73	104.6	111.54	92.11	93.06	131.77	85.36	88.24	124.24	116.95	100.05	113.88
ENSG00000074356|NCBP3	52.38	47.28	71.56	54.3	56.02	66.03	102.24	36.46	38.23	92.84	46.31	35.94	54.35	44.48	30.18	65.49	48.82	45.71	54.22	47.96	38.39	68.57	64.81	40.73	54.75	56.62	63.06	94.69	70.8	47.65	74.61	62.44	66.07	69.09	53.99	44.27
ENSG00000074370|ATP2A3	1.98	1.41	3.35	1.28	2.13	2.41	1.26	1.59	2.46	1.16	1.34	3.09	2.5	4.25	3.5	2.3	1.37	3.75	0.37	1.83	3.29	0.9	2.49	4.24	2.13	2.3	2.3	1.41	0.8	5.06	1.71	1.13	2.82	1.75	0.99	2.02
ENSG00000074410|CA12	36.5	40.21	8.6	38.78	2.66	7.15	6.77	19.13	20.22	83.5	55.1	23.84	101.71	54.68	22.33	118.77	64.58	15.79	80.57	49.98	21.01	88.41	78.64	24.83	98.96	85.89	17.5	32.13	22.46	8.19	48.72	27.38	13.16	75.61	58.18	16.82
ENSG00000074416|MGLL	5.27	0.3	13.16	3.99	4.43	8.28	5.94	7.7	2.19	0.63	11.33	64.66	1.68	11.8	73.48	7.3	9.35	17.93	0.8	10.34	55.09	9.57	9.82	10.02	6.26	7.91	16.77	4.69	6.19	4.08	8.06	4.38	2.2	2.98	5.82	6.35
ENSG00000074527|NTN4	4.66	6.45	4.1	3.9	3.22	6.64	2.14	2.54	9.39	7.29	2.23	0.57	3.93	1.24	1.61	2.74	2.09	0.41	4.06	1.88	0.46	7.93	9.52	3.81	3.32	3.27	1.67	5.86	9.92	2.68	4.7	5.68	2.53	1.97	2.16	0.82
ENSG00000074582|BCS1L	31.7	21.21	68.79	38.72	56.72	58.02	42.46	41.37	43.86	51.06	49.4	63.11	41.75	47.33	49.27	51.66	55.57	69.15	48.39	61.34	61.27	48.11	38.8	60.35	49.11	52.57	78.64	62.95	44.34	69.09	68.49	47.72	57.04	50.34	41.34	65.06
ENSG00000074590|NUAK1	21.1	20.01	29.53	19.48	34.69	31.98	33.91	26.3	38.87	17.96	51.6	40.01	23.69	47.37	43.25	22.51	9.95	50.44	18.6	44.17	48.26	11.91	14.62	35.1	18.91	18.4	39.63	22.45	17.2	23.57	25.96	23.03	24.05	21.1	18.4	35.21
ENSG00000074603|DPP8	23.55	29.33	31.14	26.41	37.11	27.86	26.62	20.57	30.06	18.19	22.74	18.14	19.26	24.98	19.63	25.96	9.83	26	22.92	16.76	18.71	23.43	27.54	32.16	26.52	28.6	28.7	34.53	29.79	32.59	24.06	29.39	28.39	25.82	25.79	27.16
ENSG00000074621|SLC24A1	3.6	3.29	4.17	3.7	3.97	3.44	3.57	5.24	1.88	6.71	4.27	2.81	1.42	3.86	4.12	7.85	0.96	5.63	2.96	3.83	4.57	2.73	4.62	3.87	3.55	3.72	4.05	4.27	4.07	5	2.06	4.01	2.96	3.95	1.76	5.05
ENSG00000074657|ZNF532	205.93	215.54	225.17	236.74	293.61	231.03	255.15	220.26	259.23	161.51	194.22	220.8	192.6	190.98	206.66	245.11	88.77	255.85	200.95	221.5	223.48	221.02	224.12	254.94	242.71	183.13	231.92	203.17	224.35	227.36	250.24	240.26	266.25	223.92	228.91	256.71
ENSG00000074660|SCARF1	1.57	1.43	1.17	1.11	1.41	1.22	1.52	0.6	1.18	0.55	0.47	0.54	1.05	1.01	0.41	0.94	0.78	0.87	0.63	0.24	0.79	1.24	0.77	0.97	0.87	1.08	1.44	0.84	1.29	1.84	0.96	1.23	1.02	0.61	0.77	0.7
ENSG00000074695|LMAN1	31.9	37.19	38.74	33.82	46.91	39.27	38.49	35.25	23.36	22.46	20.86	25.49	20.47	23.21	29.68	42.68	13.83	33.76	23.21	23.87	37.16	19.48	21.37	29.31	42.37	39	36.72	49.37	42.02	54.3	25.41	24.55	47.21	59.77	43.53	54.67
ENSG00000074696|HACD3	163.44	138.33	127.4	165.44	157.7	141.28	139.03	147.44	136.02	145.75	108.71	85.29	139.19	107.7	85.32	117.58	94.53	102.53	151.41	121.01	90.62	140.35	141.06	105.44	108.91	117.75	92.04	121.81	116.09	98.46	115.11	106.84	90.42	93.89	95.01	97.8
ENSG00000074706|IPCEF1	0.48	4.58	10.77	3.95	10.52	7.55	10.86	5.49	2.83	1.01	2.04	2.52	0.68	5.65	2.84	9.61	2.51	1.02	1.01	3.25	4.37	3.94	4.6	1.48	6.13	7.82	0.76	0.79	0.95	0.51	0.81	0.95	0.43	2.36	3.87	1.12
ENSG00000074755|ZZEF1	26.98	22.78	45.56	19.37	58.58	42.42	41.22	33.85	36.54	20.41	25.87	31.89	26.77	37.92	32.81	48.38	13.18	54.82	22.7	30.72	38.35	24.85	39.46	42.64	46.46	35.3	51.01	32.08	42.57	39.34	43.88	34.56	48.25	49.67	36.28	47.14
ENSG00000074771|NOX3	0	0	0	0	0	0.3	0	0	0.14	0	0	0	0	0	0	0	0	0	0	0	0	0	0	0	0	0	0	0	0.13	0.37	0	0	0	0	0	0
ENSG00000074800|ENO1	1841.64	2153.16	908.68	1905.79	875.92	980	916.75	1103.76	922.34	1271.45	694.25	488.5	1334.28	944	383.16	697.63	906.75	338.21	1503.99	942.57	515.53	982.58	802.96	589.79	490.23	533.88	353.16	919.86	593.05	711.02	890.5	630.62	458.69	499.3	522.87	328.39
ENSG00000074803|SLC12A1	0	0.04	0.97	0	0.9	0.42	0.1	0.09	0.17	0.1	0.03	0.27	1.07	0.84	0.29	0.18	0.09	0.2	0.12	0.29	0.41	0.11	0.13	0.25	0.06	0	0.03	0.03	0.06	0.2	0.09	0.11	0.29	1.08	0.06	0.1
ENSG00000074842|MYDGF	60.38	53.65	55.05	63.56	63.87	62.3	47.85	61.08	50.36	57.73	55.35	68.87	55.88	59.94	53.75	132.91	192.69	91.47	56.28	57.66	54.02	55.58	48.77	57.8	199.29	194.96	109.15	76.16	70.43	84.16	57.97	59.68	61.92	211.76	250.24	92.9
ENSG00000074855|ANO8	33.76	34.49	57.4	29.48	65.4	71.91	71.13	27.98	50.35	50.24	61.21	76.65	46.1	65.45	84.55	59.14	17.49	90.62	41.94	63.71	65.35	55.97	61.4	84.58	61.1	56.62	85.9	45.01	49.24	70.55	64.99	67.92	108.03	63.05	54.7	87.83
ENSG00000074935|TUBE1	47.28	44.83	53.45	44.09	67.29	63.71	45.14	39.92	33.86	27.25	35.2	39.51	27.16	28.95	49.01	100.64	48.77	102.66	28.95	30.96	42.41	35.99	28.93	38.73	128.14	125.31	109.26	43.07	49.43	51.14	43.96	37.67	53.38	105.33	110.34	102.85
ENSG00000074964|ARHGEF10L	9.58	13.02	23.91	8.37	47.65	33.97	21.72	12.23	22.79	17.33	19.22	22.82	14.16	18.49	29.01	20.94	20.01	24.85	12.76	20.96	24.82	19.77	20.65	27.09	22.69	19.94	25.69	19.55	18.05	29.19	18.77	17.95	29.19	21.72	24.85	29.77
ENSG00000074966|TXK	0	0	1.11	0.49	0.34	0	0.34	0	0.27	0.93	0.35	0	0	0.27	0.24	0	0	1.29	0	0.83	0	0	0.93	0.3	0	0.26	0.27	3.75	0.26	0	0.22	0.22	0	0.56	0.27	0.5
ENSG00000075035|WSCD2	0.74	1.38	6.51	1.33	7.84	7.86	4.06	1.94	6.53	0.26	4.6	5.92	0.42	1.13	8.83	0.27	0.05	0.79	0.16	0.23	5.7	1.12	0.55	0	0.15	0.14	0	0.14	3.56	0.65	0.78	1.23	0	0.15	0.07	0
ENSG00000075043|KCNQ2	75.07	86.51	110.38	68.28	97.31	111.17	97.24	67.38	89.99	118.14	119.86	135.88	121.73	118.81	135.65	97.39	111.48	144.79	108.04	128.25	136.1	113.48	129.88	144.72	121.47	90.58	146.37	83.48	99.19	158.39	132.41	123.49	250.41	164.94	108.5	227.64
ENSG00000075073|TACR2	0	1.46	0.9	0.9	1.31	2.77	2.86	0.55	1.51	0.3	1.98	0.38	0.32	0.5	1.19	0.92	0	1.05	1.25	1.03	1.68	0.81	1.81	1.64	0.53	0.64	0.3	1.63	1.13	1.35	0.55	0.5	0.94	0.69	0.67	1.04
ENSG00000075089|ACTR6	49.03	43.11	89.7	40.38	71.62	77.37	61.81	78.61	75.35	55.04	72.73	78.67	61.27	73.41	77.55	68.65	85.43	81.59	61.58	70.47	72.97	64.7	70.66	86.98	78.06	79.55	78.02	64.8	76.79	83.15	73.15	64.08	88	77.25	69.16	87.61
ENSG00000075131|TIPIN	45.15	41.76	24	24.37	14.33	22.85	14.2	24.21	29.34	34.81	23.34	44.96	42.49	29.05	30	42.15	42.79	30	36.22	26.07	21.14	45.05	31.33	30.35	21.16	25.49	23.84	43.72	40.26	20.29	51.08	38.61	24.73	23.28	23.28	26.89
ENSG00000075142|SRI	136.15	146.77	77.22	147.45	54.31	39.3	64.53	91.08	104.43	188.15	78.11	58.48	164.09	85.31	47.2	122.6	155.79	46.34	191.04	95.1	67.58	191.03	152.85	47.18	141.58	173.18	56.8	380.51	337.32	82.35	382.87	374.54	70.5	123.44	158.4	58.77
ENSG00000075151|EIF4G3	82.23	64.27	88.27	79.36	95.54	84.82	88.17	71.4	84.07	81.08	75.61	86.92	76.85	77.32	72.22	87.76	33.29	88.21	94.24	86.63	89.01	79.5	73.99	68.72	89.3	88.09	80.02	66.95	73.59	65.86	76.09	79.42	70.32	82.82	76.39	81.42
ENSG00000075188|NUP37	37.86	64.07	9.01	57.73	8.06	8.58	13.21	32.01	27.33	31.25	18.98	11.9	39.97	16.92	9.82	35.29	40.91	8.01	43.01	26.96	9.7	38.02	31.89	9.89	33.91	28.69	8.76	25.48	25.18	9.63	28.44	31.44	15.65	18.52	18.79	17.44
ENSG00000075213|SEMA3A	11.16	12.17	32.84	6.37	21.03	19.58	24.12	25.7	20.91	22.67	24.14	20.35	24.66	25.31	20.18	34.31	10.99	38.21	19.38	27.55	27.12	23.64	26.5	30.23	12.1	16.23	32.71	20.07	11.2	26.69	9.66	11.06	34.71	10.01	8.25	31.83
ENSG00000075218|GTSE1	42.66	42.99	1.15	39.11	0.6	1.62	4.12	7.75	21.37	37.37	13.88	0.32	33.69	17.8	0.08	26.88	18.75	0.96	36.89	18.35	1.51	47.82	46.81	1	17.3	25.48	1.04	45.78	30.36	0.6	44.78	54.71	0.38	10.9	25.78	0.43
ENSG00000075223|SEMA3C	15.03	10.16	41.8	12.42	26.79	44.99	37.39	75.75	22.39	7.09	67.68	37.27	15.2	69.03	32.08	7.53	10.32	69.7	8.09	77.22	56.43	3.55	7.45	36.34	7.87	6.38	66.88	8.11	15.76	147.05	12.73	6.09	154.27	11.42	6.14	71.92
ENSG00000075234|TTC38	21.41	20.24	4.86	21.22	5.92	11.97	13.37	7.75	15.47	20.63	11.58	13.67	23.54	15.71	10.66	16.97	17.34	19.7	21.69	13.87	3.6	23.1	15.6	16.29	14.47	19.96	11.47	18.96	13.37	9.21	14.03	19.76	20.94	18.04	14.7	14.82
ENSG00000075239|ACAT1	52.72	44.47	86.04	48.75	66.28	79.05	63.6	71.91	60.45	60.39	82.46	92.77	63.42	82.75	102.03	78.64	82.42	96.65	52.96	90.51	122.2	58.61	70.25	99.59	76.33	66.09	90.28	58.68	62.95	91.16	67.56	70.22	95.03	66.17	67.19	95.21
ENSG00000075240|GRAMD4	28.94	24.38	26.11	36.91	31	53.27	65.02	48.34	36.07	20.86	53.74	32.65	44.77	34.23	34.35	148.18	27.63	61.71	35.17	44.99	48.51	40.11	43.5	47.85	51.65	34.24	43.5	44.22	39.26	59.55	43.75	41.56	68.83	42.96	36.95	69.34
ENSG00000075275|CELSR1	67.9	66.5	1.55	80.03	0.38	1.83	5.6	7.32	23.42	89.03	24.08	1.01	90.27	29.05	1.25	62.41	58.73	2.85	94.87	39.36	4.68	75.48	59.01	3.52	47.24	57.31	4.06	30.07	20.35	5.34	43.44	33.85	7.99	35.98	42.59	4.5
ENSG00000075290|WNT8B	11.3	3.35	0.42	28.89	0.68	1.02	14.96	23.78	0.92	1.75	0.39	0.45	0	0.13	0	0.48	0	0.65	1.36	1.63	0.12	0.13	0.22	0	0	0.13	0	0	0	0.24	0	0.13	0	0.68	0	0.24
ENSG00000075292|ZNF638	257.55	220.31	282.38	219.29	302.66	258.17	295.18	279.72	249.22	220.71	255.34	203.7	248.29	221.23	228.79	268.15	275.57	299.16	232.46	269.4	230.05	217.05	262.71	287.42	300.39	274.88	305.06	231.86	229.94	257.47	257.97	250.99	288.97	255.81	200.99	260.37
ENSG00000075303|SLC25A40	33.91	33.21	35.11	34.14	68.5	31	47.87	34.43	30.36	36.47	33.91	27.77	45.74	20.22	29.8	34.21	18.46	41.17	37.69	30.74	26.49	34.7	32.9	34.34	17.59	36.67	27.88	35.53	39.9	37.62	49.71	41.79	38.82	19.28	17.76	24.73
ENSG00000075336|TIMM21	49.46	43.51	52.42	51.71	44.35	46.68	42.08	51.46	50.19	60.07	58.29	57.22	50.78	47.94	46.04	43.39	55.28	51.84	45.3	52	50.54	60.16	45.82	53.87	38.51	46.13	52.61	57.11	62.36	55.65	49.15	38.58	58.1	52	40.36	67.66
ENSG00000075340|ADD2	68.15	77.14	161.38	78.42	110.83	128.71	119.03	124.48	97.86	56.44	100.01	126.41	59.68	99.68	120.49	60.63	34.37	185.66	57.99	101.48	134.76	59.72	62.65	141.49	56.59	47.2	169.16	53.85	63.33	140.36	76.89	69.41	157.2	63.09	46.45	156.86
ENSG00000075388|FGF4	0	0	0	0	0	0	0	0	0	0	0	0	0	0	0	0	0	0	0	0	0	0	0	0	0	0	0	0	0	0	0	0	0	0	0	0
ENSG00000075391|RASAL2	23.4	23.15	52.57	24.22	76.08	51.4	45.19	26.45	35.12	14.42	20	31.64	18.82	18.13	30.38	25.98	4.54	25.58	16.5	19.97	32.84	17.05	20.33	22.05	19.79	20.29	19.45	20.7	24.55	28.91	26.22	22.5	29.53	16.49	15.4	21.04
ENSG00000075399|VPS9D1	20.23	14.55	32.07	16.8	39.09	40.68	35.23	19.68	28.85	21.52	23.7	32.75	20.95	30.66	39.26	24.66	27.33	35.02	18.76	34.59	32.14	20.9	25.89	36.84	26.32	21.88	41.58	23.12	26.1	36.35	27.75	26.6	38.15	29.27	22.4	37.85
ENSG00000075407|ZNF37A	33.06	29.71	37.33	33.83	45.4	36.86	34.87	28.93	33.97	34.24	30.19	31.91	30.3	27.21	30.19	48.09	17.29	49.9	34.96	35.12	30.58	44.43	43.16	43.68	44.26	41.67	42.82	43.03	42.27	45.14	46.93	46.81	48.5	40.57	38.22	45.55
ENSG00000075413|MARK3	138.53	126.66	218.06	128.13	212.91	216.46	237.26	178.68	194.14	151.47	190.88	186.82	152.26	180.83	197.29	191.64	188.19	234.05	156.52	173.96	198.38	167.91	174.8	240.12	170.36	169.04	258.62	163.62	206	242.44	194.79	195.37	242.96	194.47	184.79	261.51
ENSG00000075415|SLC25A3	545.89	591.05	405.63	592.79	380.7	410.54	412.97	479.86	501.71	516.42	383.57	348.63	497.21	382.96	313.3	412.7	513.27	290.88	513.46	406.61	365.31	430.42	388.66	299.84	379.72	392.79	310.07	416.17	385.4	280.99	345.26	380.94	269.33	353.11	364.26	295.2
ENSG00000075420|FNDC3B	10	8.34	13.7	11.24	6.46	9.47	9.65	9.72	8.16	8.48	12.48	14.84	11.71	13.75	20.5	20.43	7.88	8.26	8.38	11.41	13.26	13.54	16.63	11.96	25.28	21.74	9.16	10.37	11.8	19.13	13.1	10.22	30.01	21.37	22.39	10.21
ENSG00000075426|FOSL2	2.96	3.45	1.01	7.06	1.09	1.26	2.96	2.19	1.79	1.32	1.47	3.76	2.06	1.61	5.42	3.68	2.12	8.91	2.9	1.93	3.98	2.4	3.67	7.69	2.66	2.75	5.62	5.3	3.8	10.66	3.01	2.52	10.4	5.83	4	12.54
ENSG00000075429|CACNG5	0.36	0.96	1.03	0	7.06	4.79	15.88	4.26	2.9	0	0.39	0.27	0.46	0	0.21	0.22	0	0	0.23	0.41	0.44	0.46	0.6	0	0.77	1.14	0	1.64	1.51	2.81	0.19	1.57	0	0.75	0.72	0
ENSG00000075461|CACNG4	83.09	66.97	131.8	89.9	151.55	136.92	166.83	82.53	124.88	77.91	56.65	52.47	69.98	57.42	45.59	45.56	33.65	51.9	80.85	61.36	47.07	69.88	79.17	37.3	42.47	46.68	61.51	105.65	136	50.59	101.11	127.84	52.62	43.66	46.37	48.04
ENSG00000075539|FRYL	57.09	53.21	35.87	53.62	65.7	52.86	55.56	57.67	62.79	65.94	52.65	35.05	64.29	48.31	32.91	70.36	66.68	57.1	76.81	58.47	35.19	78.51	97.97	70.87	80.78	66.68	52.94	70.6	78.47	70.29	86.61	86.5	95.97	83.32	59.55	73.86
ENSG00000075568|TMEM131	104.55	86.13	46.01	77.18	40.68	43.21	47.03	44.82	57.55	93.5	56.77	51.8	85.86	59.8	43.37	110.19	40.25	44.54	89.6	71.23	48.6	87.3	82.92	45.55	95.43	95.64	40.9	80.76	85.66	45.26	89.22	97.14	55.57	75.29	86.52	53.23
ENSG00000075618|FSCN1	236.02	237.71	267.49	226.83	245.23	282.33	307.26	222.91	264.18	248.33	301.39	287.56	263.16	297.02	255.94	182.48	173.67	209.34	249.62	305.72	288.99	249.66	230.29	280.23	172.38	156.57	195.86	230.97	213.85	239.4	226.22	213.31	233.28	158.4	139.41	183.59
ENSG00000075624|ACTB	3330.98	3073.59	3507.84	3635.28	2912.26	3586.16	4050.4	4388.68	3775.96	4401.04	6017.99	3912.66	4893.76	5695.26	3686.11	3779.2	3795.65	3875.72	4325.27	5568.1	4121	4641.83	4522.53	4814.72	3565.58	3241.19	3819.01	4460.64	4051.11	4668.59	4650.36	4471.66	4823.41	3729.65	3335.89	3993.22
ENSG00000075643|MOCOS	2.15	2.06	2.07	3	0.57	1.07	0.61	0.8	1.68	1.93	1.4	1.71	2.64	2.99	2.09	3.81	1.41	0.4	6.54	1.78	2.52	3.3	3.76	0.32	3.14	5.14	0.61	3.6	0.55	0.44	0.33	1.47	0	3.11	3.95	0.32
ENSG00000075651|PLD1	0.2	0.23	0.15	0	0.06	0.23	0.04	0.28	0	0.08	0.78	1.76	0.12	0	0.65	1.68	2	0.89	0.17	0	1.3	2.17	1.78	0.18	0.14	0.98	0.3	2.1	3.75	1.25	2.47	0.77	0	1.31	1.77	0
ENSG00000075673|ATP12A	0	0	0	0	0	0.15	0	0	0	0	0	0	0	0	0	0	0	0	0	0	0	0.07	0	0	0	0	0	0	0	0	0	0.06	0	0	0	0
ENSG00000075702|WDR62	16.21	15.99	2.95	19.29	4.19	7.51	5.83	2.56	7.81	18.45	8.55	2.48	13.74	9.04	1.97	13.02	10.2	3.52	17.03	10.34	4.02	18.07	16.97	3.41	7	14.18	2.07	19.06	14.2	7.24	17.81	19.38	3.87	7.14	10.78	2.8
ENSG00000075711|DLG1	83.13	81.58	36.95	72.21	36.21	29.92	35.15	43.23	51.19	61.49	40.73	29.24	72.67	34.9	34.05	96.85	44.69	48.16	76.36	49.89	43.56	60.09	56.76	34.51	96.61	95.41	35.95	59.96	50.7	34.12	78.9	52.56	26.83	89.03	79.56	35.19
ENSG00000075785|RAB7A	114.17	104.67	200.71	107.28	191.44	196.85	195.01	202.77	142.91	129.25	162.75	184.02	126.56	155.81	164.53	151.65	101.46	149.55	120.9	169.71	191.65	132.12	131.21	165.51	143.14	157.56	159.14	113.94	146.59	147.89	116.96	135.21	146.84	143.66	166.57	158.23
ENSG00000075790|BCAP29	30.03	38.05	37.35	39.96	22.07	27.85	20.73	38.21	29.51	52.14	50.62	72.68	42.8	67.53	90.94	75.27	25.84	73.09	33.73	53.59	95.08	57.1	49.6	64.75	38.41	48.05	64.32	38.22	51.74	34.37	40.46	39.59	35	30	39.45	45.85
ENSG00000075826|SEC31B	26.32	25.43	34.47	24.11	42.85	39.67	42.64	28.9	42.2	26.09	26.87	30.41	30.91	28.57	44.02	30.83	30.35	46.06	29.59	29.68	34.5	28.6	35.6	42.04	36.2	41.25	46.3	18.18	22.19	29.79	29.75	34.63	45.59	37.81	28.61	41.25
ENSG00000075856|SART3	73.12	56.43	72.52	68.61	67.09	81.9	61.02	63.31	69.97	67.85	71.04	62.59	56.07	51.74	49.67	76.16	41.59	69.64	73.33	61.75	49.69	69.76	78.96	67.66	73.77	70.65	75	82.56	81.09	81.93	70.76	77.42	74.99	85.19	81.39	73.53
ENSG00000075884|ARHGAP15	0	0.13	1.35	0.29	0.84	2.45	0.31	3.81	0	1.9	2.9	1.32	1.65	2.12	4.06	0	0.34	2.82	0.15	6.35	8.56	0.15	1.85	0.63	1.25	0.31	0	3.03	0	0.15	0	0.32	0	0.17	0	1
ENSG00000075886|TUBA3D	0.17	1.02	0.21	0.35	1.24	0.43	1.48	0.43	0.58	1.68	0.96	1.99	0.37	0	0.52	1.02	0.13	0.24	0.18	0.6	0.78	1.08	0.56	0.8	0.62	0.37	0.87	0.57	0.37	1.22	2.12	0.38	0.66	0.2	0	0.62
ENSG00000075891|PAX2	2.78	5.97	5.06	0	3.19	5.33	0.61	1.15	4.36	0.94	2.36	0.61	0	0	0.59	0	0	0	0	0	0.08	0	0	0	0.28	0.06	0.07	6.13	2.08	0.63	0	0	0	0	0.08	0.15
ENSG00000075914|EXOSC7	54.05	53.2	45.64	46.34	50.68	42.24	43.1	35.59	38.41	41.42	31.85	32.53	36.76	31.08	33.74	31.51	29.47	47.38	49.42	36.21	39.48	37.06	32.16	32.42	39.98	36.35	41.68	36.34	36.54	48.29	39.28	38	39.84	36.43	40.11	51.44
ENSG00000075945|KIFAP3	50.09	43.46	227.02	39.35	216	224.06	162.47	181.12	132.2	63.31	169.48	237.84	76	162.19	243.03	64.7	58.83	144.23	52.1	147.44	256.61	55.37	76.73	152.5	66.67	53.54	148.47	58.02	83.84	131.56	73.57	75.77	148.95	65.06	56.53	131.16
ENSG00000075975|MKRN2	26.61	29.6	24.79	33.39	28.02	32.38	23.54	28.13	31.02	23.41	31.79	24.88	26.83	31.63	30.21	36.62	21.54	34.94	26.79	30.17	24.08	30.11	32.18	38.91	39.84	34.89	36.37	34.22	36.03	37.36	28.78	33.64	33.36	42.23	33.96	38.23
ENSG00000076003|MCM6	97.48	79.81	13.14	99.57	8.09	9.09	16.12	25.79	40.66	95.97	33.87	19.93	80.38	42.69	19.3	38.64	44.46	18	92.91	47.45	19.31	73.09	67.17	17.44	22.8	33.37	14.68	78.66	55.84	19.87	80.14	71.93	17.23	20.42	22.13	14.21
ENSG00000076043|REXO2	22.22	32.46	37.34	23.61	31.47	18.13	15.25	18.95	30.59	36.32	30.7	36.72	35.88	35.28	29.68	76.75	63.96	29.74	29.57	25.44	39.77	71.67	56.46	31.68	87.68	130.92	36.62	32.2	46.47	18.92	34.2	40.86	15.95	70.52	146.56	21.07
ENSG00000076053|RBM7	33.72	37.46	48.69	35.88	44.39	54.65	43.24	49.72	49.6	38.32	40.92	35.1	40	46.92	36.69	51.57	29.07	52.95	32.7	36.89	47.79	44.25	33.51	55.57	43.86	44.1	47.33	34.43	35.92	42	32.45	36.26	46.14	40.45	41.62	44.7
ENSG00000076067|RBMS2	13.77	9.97	4	10.31	6.09	4.55	7.05	4.56	8.71	13.76	7.3	5.05	9.02	7.08	7.68	13.91	5.9	5.57	11.54	8.09	3.76	11.39	10.12	7.06	10.75	14.46	5.35	10.48	64.96	5.1	156.61	9.01	6.94	9.57	8.85	4
ENSG00000076108|BAZ2A	72.79	82.22	77.32	72.77	92.72	63.88	87.22	64.97	71.4	55.6	65.92	68.26	51.59	58.9	45.4	82.46	20.75	73.33	70.89	77.31	50.22	74.54	55.76	51.43	78.61	50.91	50.66	61.15	48.78	58.53	64.83	63.39	73.13	80.42	76.87	57.8
ENSG00000076201|PTPN23	24.68	22.24	30.03	30.71	31.99	34.81	33.88	18.18	40.23	23.34	29.46	32.5	26.78	33.66	30.73	39.77	13.88	45.63	22.26	30.22	36.41	27.25	28.27	45.38	36.59	36.28	42.42	29.86	26.48	51.87	30.22	30.17	44.81	45.1	41.73	51.19
ENSG00000076242|MLH1	81	50.67	54.39	54.22	49.37	35.47	61.9	48.01	64.74	46.04	42.37	53.82	53.88	47.92	39.66	54.51	38	44	58.3	49.34	46.32	55.59	42.3	40.93	54.06	47.99	37.53	52.05	39.02	32.46	51.39	62.4	39.51	48.21	40.66	40.13
ENSG00000076248|UNG	88.86	82.98	30.21	96.45	38.15	37.27	36.97	39.18	49.39	96.57	46.45	26.89	84.73	54.64	31.51	59.79	63.92	45.92	83.53	55.99	26.06	79.34	63.14	49.58	53.76	55.43	42.89	72.45	61.27	49.61	70.49	66.57	49.55	45.1	44.13	42.45
ENSG00000076258|FMO4	0.65	0.58	0.13	1.38	0	0	0.12	0	0.12	0	0.12	0	0.98	3.69	0	3.05	1.41	0	0.99	0.13	0	2.22	2.06	0	1.41	1.81	0	0.6	1.96	0	1.01	3.71	0	0.38	0.47	0
ENSG00000076321|KLHL20	20.26	23.88	27.02	19.62	22.63	23	32.57	31.64	26.34	21.49	27.72	24.45	31.07	27.22	23.91	29.43	13.33	29.35	23.49	23.71	29.27	23.82	22.54	26.07	33.49	31.86	32.96	30.18	30.02	37.51	30.74	28.38	32.33	27.8	31.97	29.78
ENSG00000076344|RGS11	4.23	0.98	5.75	1.13	5.07	7.35	0.52	1.75	1.22	0.98	0.62	4.26	0.38	0.83	7.51	9.39	3.58	4.92	0.12	0.76	1.71	5.68	5.66	3.94	3.14	6.59	3.56	3.03	5.53	8.75	5.86	5.98	6.62	6.2	5.7	4.29
ENSG00000076351|SLC46A1	25.65	23.79	48.74	13.54	46.43	33.31	31.51	32.2	20.97	32.55	38.83	23.94	15.41	31.9	23.74	24.19	28.51	30.77	14.81	29.95	33.18	37.72	16.66	18.81	42.25	16.59	35.45	31.41	33.24	46.43	30.59	13.74	22.21	15.85	32.9	28.87
ENSG00000076356|PLXNA2	87.31	75.42	98.6	43.18	81.95	88.69	82.37	71.16	106.11	110.58	164.65	117.58	139.4	180.62	124.25	143.36	50.05	286.17	128.79	137.26	120.38	95.44	148.2	357.19	144.3	83.99	200.82	87.59	79.03	428.17	123.16	79.18	594.42	155.48	119.43	481.99
ENSG00000076382|SPAG5	98.87	89.88	10.42	106.33	18.22	15.19	22.32	28.84	54.09	89.95	50.05	11.75	79.55	45.53	8.03	73.11	86.97	9.57	95.99	69.48	15.99	148.06	123.29	25.59	50.19	76.3	14.78	127.1	94.63	14.05	122.9	141.51	23.3	33.66	70.04	11.98
ENSG00000076513|ANKRD13A	22.87	24.31	36.19	20.74	49.59	40.24	42.15	32.08	32.77	31.26	23.85	29.65	30.28	22.35	27.01	31.87	16.09	33.5	19.2	27.45	25.41	29.38	26.42	37.85	32.07	30.66	28.5	30.83	38.39	38.09	25.57	29.35	30.71	25.8	31.02	27.7
ENSG00000076554|TPD52	17.26	25.63	19.67	36.97	28.41	20.78	13.79	11.19	7.99	5.01	12.66	24.99	9.38	31.83	16.97	5.37	5.22	11.87	6.38	12.16	17.84	18.95	10.08	28.48	5.26	3.28	18.19	8.02	11.34	41.97	1.83	2.24	9.4	9.52	5.54	10.4
ENSG00000076555|ACACB	11.34	25.14	3.23	12.67	2.46	1.45	4.29	4.13	5.8	10.23	6.72	3.3	10.42	10.93	4.3	16.76	10.07	6.7	10.75	8.24	1.31	12.33	17.08	8.39	15.42	15.38	6.01	13.63	12.37	5.71	18.72	19.37	8.9	12.93	15.93	5.18
ENSG00000076604|TRAF4	56.72	48.67	70.54	57.56	93.68	85.23	93.83	68.79	62.5	86.21	89.48	122.4	86.57	112.69	87.41	80.28	75.08	102.7	84.45	82.7	74.15	95.49	88.31	124.34	89.27	80.02	97.85	107.29	126.14	115.37	93.42	103.8	127.88	114.01	91.88	108.69
ENSG00000076641|PAG1	9.9	9.01	9.75	15.21	16.12	9.41	13.98	9.51	12.11	19.06	19.63	5.76	30.09	25.94	5.28	104.91	42.9	39.22	27.39	23.32	7.75	52.34	62.64	43.95	98.43	82.5	37.13	29.35	36.51	99.71	40.33	34.45	113.15	68.96	57.47	76.49
ENSG00000076650|GPATCH1	11.74	12.13	18.99	12.12	23.28	14.56	14.41	15.33	18.25	14.45	14.08	18.83	10.63	13.12	11.98	21.58	15.4	25.21	17.51	18.63	14.7	16.31	15.67	18.88	14.91	17.01	18.91	17.78	23.83	23.99	13.78	18.83	21.56	20.51	16.63	20.56
ENSG00000076662|ICAM3	0.89	0.01	1.2	2.13	1.28	0	0.07	0	0.73	0.34	1.28	1.92	0.52	0.33	0.79	0.79	3.3	0.54	1.07	2.41	0.37	2.2	2.79	0.26	0.96	1.71	0.79	0.14	1.06	0.14	1.58	2.22	0.88	0.52	0.97	0.28
ENSG00000076685|NT5C2	71.93	55.22	164.82	63.09	183.55	145.95	123.5	105.37	113.05	63.99	112.96	133.75	76.93	84.55	117.11	102.39	45.54	131.44	84.37	105.8	128.75	69.37	93.05	122.39	125.18	99.15	144.38	92.06	92.89	127.28	80.93	84.32	159.01	122.33	115.51	153.71
ENSG00000076706|MCAM	46.04	45.05	5.94	40.12	1.2	4.65	13.92	8.34	16.11	35.99	15.44	11.65	25.58	10.96	6.51	23.86	8.13	7.19	40.18	15.19	4.67	19.53	34.06	6.1	14.99	18.65	2.64	92.37	16.19	4.03	9.64	13.15	1.22	4.97	8.8	2.24
ENSG00000076716|GPC4	225.16	269.06	7.49	290.61	4.84	10.79	31.02	48.24	116.94	228.12	80.08	16.45	198.12	86.74	17.87	109.87	84.65	11.12	241.48	114.52	20.07	129.85	89.07	11.44	69.59	85.39	9.94	27.08	32.14	3.34	39.94	39.57	4.11	39.88	36.55	6.06
ENSG00000076770|MBNL3	16.42	8.25	0.66	16.97	0.65	1.39	1.62	4.15	5.15	7.92	3.32	0.12	6.53	3.16	0.03	7.22	2.62	0.16	10.99	4.09	0.13	9.66	7.96	0.18	6.38	6.22	0.63	8.03	7.9	0.64	10.7	9.52	0.48	5.92	6.92	0.44
ENSG00000076826|CAMSAP3	22.16	23.46	68.07	23.58	68.21	79.02	60.51	25.64	50.51	26.25	47.62	69.72	24.67	45.6	78.41	30.26	32.58	70.48	29.52	40.68	71.75	28.69	29.7	80.24	37.04	30.88	85.39	22.67	25.05	42.83	33.78	33.3	81.77	32.65	26.75	77.5
ENSG00000076864|RAP1GAP	4.58	3.89	29.31	4.6	23.14	25.08	16.09	10.62	16.53	2.29	15.5	46.51	3.09	15.71	39.22	3.5	2.57	14.17	2.97	18.59	55.92	4.91	4.47	10.57	3.56	3.55	14.56	9.82	15.76	9.45	5.7	12.61	5.91	2.14	3.3	14.78
ENSG00000076924|XAB2	42.05	39.35	25.38	41.67	33.3	28.8	28.15	26.87	33.91	35.19	28.61	27.36	33.81	28.71	27.56	43.29	54.72	34.65	41.23	26.77	21.46	33.97	31.76	37.38	41.65	41.27	33.14	41.42	38.62	39.05	39.27	35.89	35.51	47.61	44.51	41.78
ENSG00000076928|ARHGEF1	30.39	28.56	20.2	29.65	32	44.6	26.25	19.12	31.65	29.19	24.73	22.12	31.16	31.84	19.99	60.84	59.08	37.64	32.4	29.03	15.66	62.65	77.48	71.53	72.96	58.52	53.78	45.49	51.56	52.95	91.92	96.97	88.64	64.46	82.22	56.69
ENSG00000076944|STXBP2	6.39	7	17.49	7.79	24.38	22.14	17.01	3.19	11.5	5.16	7.62	9.26	5.97	7.55	17.61	13.14	4.01	22.83	4.37	6.55	11.11	3.97	3.59	15.14	5.65	8.74	20.66	6.21	4.25	19.56	9.91	5.05	9.29	7.19	5.59	22.76
ENSG00000076984|MAP2K7	21.01	21.56	22.96	22.18	33.91	24.25	29.71	12.89	22.04	23.3	32.66	25.43	21.12	25.52	28.68	32.97	12.89	35.34	26.28	24.65	23.16	29.95	34.74	35.94	39.08	26.91	34.47	27.55	30.36	35.07	35.22	28.97	33.46	50.21	39.09	40.82
ENSG00000077009|NMRK2	0	0	0	0.27	0	0.33	0	0.49	0	0	0	0	0	0	0	0	0	0	0	0	0	0	0	0	0	0	0	0	0	0	0	0	0	0.46	0	0
ENSG00000077044|DGKD	25.29	25.44	40.41	48.04	71.26	49.77	57.07	31.02	74.45	43.85	29.97	51.66	51.74	41.56	99.62	42.27	36.46	57.58	39.15	34.24	81.38	55.6	43.92	37.66	54.62	45.89	49.46	28.16	27.37	50.54	49.04	39.94	63.95	54.02	35.09	68.93
ENSG00000077063|CTTNBP2	15.45	8.97	81.21	14.57	37.33	83.19	40.61	79.23	33.77	30.36	135.27	160.33	41.94	109.27	168.2	30.88	13.05	81.68	31.22	108.38	138.9	21.57	26.89	107.93	30.17	20.28	68.14	20.77	23.12	72.92	28.37	17.89	93.55	29.18	20.95	56.92
ENSG00000077080|ACTL6B	16.73	20.86	143.72	8.07	181.28	171.27	130.68	129.71	96.12	14.31	125.28	134.47	35.59	99.31	175.84	39.21	33.83	113.65	17.76	96	166.3	20.08	37.63	129.01	29.42	16.1	109.94	28.13	55.56	101.4	51.08	51.47	135.04	44.08	40.42	124.51
ENSG00000077092|RARB	6.21	9.5	5.7	2.14	13.65	7.9	4.49	3.72	3.98	2.84	1.86	1.67	0.5	1.24	1.81	1.03	0.29	1.03	1.07	0.53	1.62	1.06	1.04	1.48	1.17	0.5	1.87	14.67	7.65	7.16	0.85	0.92	1.05	1.5	2.84	0.84
ENSG00000077097|TOP2B	393.97	328.09	542.47	349.67	554.03	581.43	491.43	528.4	521.47	457.82	595.32	532.44	441.23	608.9	569.49	417.24	519.98	560.13	444.01	595.64	596.21	403.78	431.84	568.8	407.3	353.84	529.4	404.17	440.63	528.63	470.57	458.95	555.48	410.45	364.21	554.05
ENSG00000077147|TM9SF3	89.58	102.62	100.99	90.08	87.8	94.66	94.48	92.52	94.57	70.81	89.16	100.02	95.53	83.93	98.55	126.21	67.51	105.91	103.16	93.54	105.68	81.86	83.88	95.76	104.41	106.77	85.36	83.98	100.73	88.75	93.52	89.83	83.04	105.8	116.16	89.74
ENSG00000077150|NFKB2	10.65	11.43	0.09	9.77	0.34	0.6	2.17	1.5	5.57	6.72	3.62	0.22	15.48	6.28	0.16	8.99	7.85	0.65	8.87	3.07	0.56	9.25	8.24	2.71	8.24	13.27	2.37	6.24	7.14	1.79	5.86	10.04	1.81	7.19	7.32	2.23
ENSG00000077152|UBE2T	90.29	107	52.16	116.99	29.45	34.12	35.43	49.67	59.58	106.2	67.24	44.44	108.11	74.11	41.15	49.13	91.16	36.93	98.09	77.86	65.47	120.69	118.9	46.98	34.92	52.01	39.36	110.58	63.72	29.36	112.13	101.34	37.06	24.05	34.66	34.49
ENSG00000077157|PPP1R12B	8.77	8.34	19.07	9.94	16.26	13.23	15.15	16.13	17.06	13.38	10.18	17.29	9.07	10.4	15.51	16.64	3.81	19.58	12.08	11.72	21.01	10.42	14.45	12.07	21.81	10.77	16.71	11.86	18.62	13.17	15.94	19.97	24.82	12.58	11.51	23.37
ENSG00000077232|DNAJC10	89.84	68.88	72.04	84.92	57	52.88	56.39	69.37	60.78	74.84	54.56	51.1	67.33	53.81	58.13	150.65	81.43	59.84	60.73	47.07	71.83	78.31	85.42	57.35	204.3	222.26	62.37	70.91	64.31	57.54	62.05	67.36	49.06	184.06	207.46	58.62
ENSG00000077235|GTF3C1	51.95	50.47	60.06	60.35	58.59	65.95	56.76	47.49	77.23	59.53	75.46	53.51	56.66	57.15	56.42	58.66	65.8	50.77	75.16	58.22	66.59	61.09	56.5	41.7	60.12	50.99	52.12	55.34	52.53	45.45	56.45	54.06	44.33	67.17	53.38	60.15
ENSG00000077238|IL4R	0.41	0.12	0.2	0	0	0.1	0	0	0	0.07	0	0	0	0	0	0	0	0	0	0	0	0	0	1.24	0	0	0	0	0	3.27	0	0	0	0	0	0
ENSG00000077254|USP33	91.94	81.44	153.73	79.34	173.18	144.36	121.78	107.78	155.82	83.35	117.14	129.18	99.64	117.54	123.04	104.62	66.21	130.53	94.82	112.94	141.98	93.93	103.82	127.32	100.96	90.24	121.03	92.42	108.54	117.72	109.18	99.06	133.54	91	77.32	111.07
ENSG00000077264|PAK3	60.59	48.86	183.07	45.43	194.15	190.32	145.46	133.61	141.62	66.54	99.2	115.1	73.37	104.29	122.82	121.57	76.09	164.43	69.92	96.76	123.06	80.41	115.36	134.64	104.89	96.8	134.82	174.23	151.85	136.96	184.02	176.18	161.62	120.55	109.51	144.52
ENSG00000077274|CAPN6	5.41	9.27	0.7	6.77	1.22	0.48	0.62	1.68	4.63	0.26	0.29	1	0.35	0.58	0.26	0.4	0.35	1.17	0.82	0.3	0.13	0.97	1.21	7.04	0.46	0.35	0.85	2.41	2.46	7.96	1.66	2.37	0.9	0.75	0.8	0.84
ENSG00000077279|DCX	202.45	143.31	776.34	131.58	860.97	796.95	674.24	627.59	598.35	243.49	586.09	630.72	353.15	621.91	670	525.6	186.08	982.31	246.88	527.42	661.66	368.21	588.98	942.21	459.78	369.53	812.59	732.58	928.76	989.9	883.34	938.14	1227.56	556.65	439.35	877.36
ENSG00000077312|SNRPA	138	135.42	59.64	152.88	41.5	46.07	54.55	59.72	84.24	124.93	75.26	54.85	115.5	94.09	56.47	77.73	99.98	52.19	112.52	102.71	53.41	121.15	87.7	65.95	76.47	80.6	67.06	88.45	66.2	62.69	89.83	89.07	57.28	74.67	68.86	64.24
ENSG00000077327|SPAG6	2.02	0.99	1.23	2.48	2.02	0.38	3.08	1.84	1.34	0.55	0	0	0.11	0	0	0	0	0.14	0.22	0.12	0	0.22	0.37	0	0.12	0	0	0.42	0	0.41	0	0	0	0.12	0.34	0
ENSG00000077348|EXOSC5	19.07	17.44	33.14	15.08	17.97	20.6	23.41	34.81	20.73	13.61	26.93	52.45	14.26	24.99	41.39	19.66	22.16	71.81	20.39	18.43	48.6	27.9	17.86	30.66	26.44	22.39	43.59	49.99	13.72	23.43	19.21	15.33	21.19	29.28	40.43	43.16
ENSG00000077380|DYNC1I2	188.32	192.54	366.03	160.97	376.33	361.53	293.05	382.75	328.97	217.25	332.24	356.54	239.07	322.15	370.99	231.48	279.03	341.41	228.13	294.23	369.78	214.1	261.35	384.34	252.52	244.16	324.93	256.37	296.26	320.44	289.02	282.42	384.67	248.79	231.33	326.05
ENSG00000077420|APBB1IP	0	0	0	0	0	0.61	0	0	0.57	0.48	0	0	0	0	0	0	0.38	0	0	0	0	0.62	0.46	0	0	1.07	0	0	0.53	0	0	0	0.63	0	0	0
ENSG00000077454|LRCH4	33.87	36.76	39.73	33.42	53.06	56.25	47.73	32.07	48.32	39.59	41.8	39.04	34.97	50.7	40.87	60.12	25.23	74.54	40.96	39.14	37.9	56.43	64.78	71.28	65.44	48.01	84	52.67	42.39	69.77	48.75	67.41	87.4	62.67	51.96	83.19
ENSG00000077458|FAM76B	71.52	71.43	54.48	69.99	92.24	73.96	69.35	88.68	77.26	51.7	60.01	56.69	71.54	69.58	79.66	90.52	48.55	98.19	57.76	60.53	61.98	85.55	88.1	83.45	86.83	96.46	75.92	114.17	103.57	104.85	103.03	103.26	79.99	82.43	86.2	88.03
ENSG00000077463|SIRT6	57.71	28.75	51.89	37.14	52.21	69.11	45.14	26.88	53.6	49.07	48.23	60.21	46.05	52.37	65.75	55.06	71.18	58.42	44.9	46.06	52.86	68.08	67.83	89.31	54.88	41.15	68.79	68.98	46.47	58.67	79.62	58.1	58.27	58.62	49.84	63.86
ENSG00000077498|TYR	0.19	0	0.23	0.2	0	0	0.1	0	0	0.1	0.21	0	0	0	0	0.39	0	0	0	0.22	0	0	0.09	0	0.77	0.1	0.1	0	0.11	0	0	0	0	1.72	0.11	0
ENSG00000077514|POLD3	45.34	34.28	13.15	45.48	12.67	12.87	12.98	18.68	22.26	31.92	21.08	9.1	32.03	19.61	13	25.77	23.79	11.45	39.18	21.29	16	48.49	31.2	10.23	21.68	30.3	9.29	33.75	32.31	13.71	41.29	40.5	9.89	15.89	23.61	15.98
ENSG00000077522|ACTN2	2.88	1.83	13.69	2.11	6.8	6.56	3.21	1.24	1.7	1.15	2.08	5.73	1.47	2.48	12.87	10.08	16.89	17.06	2.68	2.12	5.16	11.25	9.01	9.67	11.61	16.11	14.88	19.4	29.33	6.27	36.55	40.27	4.71	6.7	12.57	4.59
ENSG00000077549|CAPZB	284.67	259.43	385.49	249.79	272.31	357.77	369.9	293.29	340.43	310.64	380.26	390.09	326.31	391.74	356.45	242.74	296.73	328.71	304.82	409.73	367.54	294.23	314.09	345.81	240.98	269.43	301.04	314.67	274.32	332.6	323.7	307.77	316.14	261.22	240.83	292.32
ENSG00000077585|GPR137B	25.22	25.87	15.46	16.77	10.77	15.81	20.3	19.85	18.57	27.37	18.79	12.21	25.45	20.87	16.7	32.27	25.9	19.91	14.03	19.9	17	40.79	49.47	22.61	34.32	46.06	13.81	28.42	39.43	20.36	27.33	39.58	15.97	26.62	35.66	13.81
ENSG00000077616|NAALAD2	7.99	13.8	9.82	2.72	31.29	21.92	11.53	9.89	19.29	2.31	3.4	2.49	1.73	2.16	1.93	3.13	1.96	5.04	1.35	2.51	3.3	4.99	5.09	4.12	2.74	2.6	3.7	2.42	2.92	5.21	1.78	3.12	3.28	2.15	2.13	3.8
ENSG00000077684|JADE1	57.55	49.63	12.57	52.06	18.34	18.05	14.46	22.53	28.45	47.63	28.83	10.69	47.55	29.36	14.33	60.5	49.86	25.52	47.95	29.17	13.3	63.44	56.24	21.2	59.8	61.66	23.98	59.7	42.59	32.77	55.42	41.68	28.95	59.99	63.83	30.65
ENSG00000077713|SLC25A43	1.11	1.52	0.45	0.77	0.26	0.88	0.28	0.11	1.53	1.44	0.95	0.66	2.13	0.86	0.62	4.22	3.27	0.71	2.12	0.41	0.18	5.74	5.46	1.37	3.75	5.39	0.71	7.71	4.08	1.57	2.74	3.47	0.97	2.47	4.67	0.61
ENSG00000077721|UBE2A	74.83	68.58	94.42	68.84	115.91	105.13	92.91	89.5	98.39	78.21	101.18	93.41	97.85	96.46	101.19	108.32	98.05	97.8	90.96	85.91	99.58	120.67	102.47	110.39	98.88	116.76	106.43	113.15	117.38	106.94	99.51	103.22	103.23	102.76	113.94	107.08
ENSG00000077782|FGFR1	129.87	114.76	20.86	105.97	25.39	25.1	49.33	27.44	63.5	108.67	51.24	9.51	106.88	66.47	6.05	114.92	36.36	31.31	138.93	60.04	15.5	132.96	114.16	23.54	117.79	148.93	40.8	31.41	40.85	19.87	33.07	63.88	19.9	112.74	99.82	57.04
ENSG00000077800|FKBP6	3.9	3.78	2.59	0.26	1.31	0.65	1.24	0.22	0.63	0	1.04	1.2	0.14	0.15	5.66	0	1.29	2.92	0.69	2.63	0.31	1.88	1.43	1.53	0.15	0.55	1.81	1.04	0	1.64	0	2.55	0.83	1.18	3.66	5.21
ENSG00000077935|SMC1B	0	0.15	0.06	0.05	0.23	0	0	0	0	0	0.12	0.21	0	0	0	0.11	0	0.38	0.06	0.12	0	0.06	0	0	0.06	0.06	0.11	0.14	0	0.06	0	0	0	0.06	0	0.11
ENSG00000077942|FBLN1	126.49	126.22	31.49	153.02	35.81	41.58	143.64	79.86	81.97	104.54	66.79	81.34	91.16	80.6	80.88	111.72	107.86	41.2	99.17	63.04	70.7	123.58	104.26	57.78	123.04	107.24	42.6	98.85	56.35	45.52	114.82	93.7	59.12	154.74	135.54	42.27
ENSG00000077943|ITGA8	0	0.03	0.16	0	0.85	0.24	0.28	0.12	0.11	0	0.07	0	0.04	0.04	0.03	0	0	0.18	0	0	0.07	0.03	0	0.24	0	0.04	0.13	0.04	0.07	0.26	0.06	0	0.25	0.08	0	0.16
ENSG00000077984|CST7	0	0	0	0	0	0	0	0	0	0	0	0	0	0	0	0	0	0	0	0	0	0	0	0	0	0	0	0	0	0	0	0	0	0	0	0
ENSG00000078018|MAP2	353.26	255.83	997.15	252.76	998.02	840.51	959.42	884.88	690.79	356.72	543.87	653.38	402.03	457.24	573.91	533.17	186.5	512.08	383.81	563.4	720.05	371.35	452.25	500.42	496.46	416.81	474.92	595.46	657.46	507.56	787.98	819.47	604.99	506.71	498.18	495.2
ENSG00000078043|PIAS2	30.63	27.54	32.7	36.08	38.2	34.09	42.3	26.05	21.37	17.15	24.71	32.43	21.35	22.72	31.37	28.7	10.75	28.91	22.07	25.76	36.8	22.47	25.75	39.96	21.74	28.01	29.08	38	43.43	41.88	32.62	33.99	26.81	27.71	32.43	29.55
ENSG00000078053|AMPH	22.1	25.06	85.02	23.62	83.53	82.7	70.57	73.14	53.65	23.22	25	68.7	20.68	12.82	51.44	20.6	13.64	8.71	14.09	24.77	79.87	22.49	24.79	7.37	17.64	20.92	9.25	15.02	18.27	21.6	20.61	25.15	17.26	18.61	19.39	6.87
ENSG00000078061|ARAF	21.52	29.06	18.53	33.85	22.03	26.77	27.37	19.54	22.71	26.43	22.17	21.74	36.4	28.94	20.55	42.34	31.36	38.54	25.7	32.77	12.57	30.75	33.57	27.55	50.98	36.31	37.05	32.89	34.58	25.49	29.35	34.37	25.25	37.93	44.1	35.76
ENSG00000078070|MCCC1	36.13	35.81	34.41	33.36	36.72	34.33	35.29	49.96	39.9	33.92	33.61	30.37	37.56	46.02	36.99	49.28	42.32	33.81	36.29	40.6	44.46	41.07	31.51	25.32	33.25	39.41	29.51	27.39	34.48	24.06	23.84	30.15	32.7	41.98	39.39	25.56
ENSG00000078081|LAMP3	0.41	0.33	0.41	0.31	0.67	0.34	0	0.34	0.08	0.38	0.23	0	0.3	0.47	0.28	3.4	0.92	1.15	0.36	0.24	0.07	0.52	0.57	0.17	6.81	9.34	1.69	0.3	0.3	0.44	0.08	0.42	0.26	8.67	9.46	1.19
ENSG00000078098|FAP	20.03	20.17	1.71	19.01	0	5.43	1.11	4.27	3.84	21.48	7.45	1.7	12.46	4.96	0.46	6.6	6.33	3.54	32.21	7.56	0.99	10.62	8.92	4.94	4.9	5.74	1.05	4.99	2.31	7.82	3.96	1.38	7.33	7.22	4.29	3.3
ENSG00000078114|NEBL	17	10.71	25.03	16.11	37.57	22.39	16.78	13.23	14.3	5.18	2.14	3.97	3	2.46	1.98	15.22	5.03	8.72	2.53	2.35	3.91	8.12	6.59	6.17	23.79	26.64	9.5	3	2.87	3.37	2.53	3.3	0.65	27.1	32.51	5.03
ENSG00000078124|ACER3	18.2	12.26	14.18	12.57	16.98	19.01	17.56	14.52	18.53	17.77	18.69	16.35	21.73	20.78	19.73	24.07	18.43	22.34	19.22	20.35	20.48	19.19	25.12	20.22	22.26	22.87	18.08	21.06	28.53	22.21	22.76	23.12	20.71	20.74	21.6	20.38
ENSG00000078140|UBE2K	64.81	58.52	112.82	53.02	89.31	97.82	91.86	92.59	71.03	63.45	89.7	93.66	62.75	74.77	103.34	81.43	49.34	108.44	61.01	94.43	120.66	63.16	63.56	85.83	94.01	90.45	105.95	66.32	73.77	89.53	70.62	62.22	87.81	94.72	77.03	98.03
ENSG00000078142|PIK3C3	60.26	55.84	35.67	37.05	45.69	35.79	39.59	44.15	41.17	44.36	29.07	27.65	39.77	29.96	27.5	45.45	76.81	38.2	35.42	34.58	38.75	47.24	34.15	28.97	49.25	46.71	26.05	63.49	53.33	35.11	46.82	52.15	36.18	52.2	38.03	30.93
ENSG00000078177|N4BP2	40.08	35.74	41.45	39.83	41.64	31.39	31.03	28.86	32.53	20.33	18.35	15.4	20.66	17.16	14.39	49.37	9.78	25.88	25.13	21.9	15.71	23.07	26.38	20.74	46.72	42.82	21.88	22.26	24.27	26.02	26.36	27.28	33.03	44.39	43.41	25.53
ENSG00000078237|TIGAR	10.64	6.16	10.97	11.13	9.01	8.72	12.26	12.39	11.03	12.23	17.07	14.62	13.08	26.38	17.3	13.2	11.65	16.94	14.34	14.27	16.45	10.68	11.75	13.86	29.2	17.64	12.32	16.57	16.72	15.23	14.11	9.77	12.44	16.85	11.99	11.6
ENSG00000078246|TULP3	29.18	33.94	20.46	32.46	12.42	14.26	18.92	24.03	24.66	35.25	23.93	15.84	33.56	22.96	11.69	46.99	18.64	15.44	39	24.55	17.53	36.87	36.79	21.5	61.7	64.12	18.82	33.14	30.47	21.14	45.49	44.07	21.96	51.95	62.67	18.27
ENSG00000078269|SYNJ2	1.21	1.69	0.68	1.02	1.68	0.33	0.76	0.5	0.33	1.47	1.05	2.58	0.79	3.19	2.48	1.75	3.49	1.86	3.3	1.22	1.68	1.15	2.44	2.48	1.66	2.32	1.45	1.55	1.6	2.08	1.49	1.17	1.44	1.77	2.84	1.29
ENSG00000078295|ADCY2	9.13	15.32	12.82	26.71	36.63	29.13	56.29	29.6	17.29	7.47	2.4	5.74	5.26	1.71	6.48	8.8	14.89	1.98	5.22	5.67	2.03	4.54	5.68	2.85	6.68	12.9	2.6	4.55	7.42	7.06	8.56	7.97	0.52	10.43	7.27	1.15
ENSG00000078304|PPP2R5C	113.91	107.06	81.36	109.18	90.43	84.09	85.87	96.77	111.61	105.47	97.28	105.07	115.83	88.11	79.14	117.56	104.47	86.95	93.58	100.17	91.91	121.51	130.62	105.37	104.03	104.24	85.2	119.12	130.51	111.24	124.68	150.54	103.38	112.93	101.73	111.79
ENSG00000078328|RBFOX1	4.57	4.96	72.35	4.21	31.32	48.98	12.32	14.66	26.4	1.8	28.95	108.47	3.69	38.08	147.86	5.02	9.34	88.29	2.26	24.06	93	4.1	15.56	117.85	5.21	7.66	87.85	2.94	11.07	141.51	6.82	6.18	202.85	8.43	4.69	114.38
ENSG00000078369|GNB1	318.18	260.38	618.64	288.56	583.84	581.73	601.5	468.45	466.16	355.88	546.06	621.12	403	554.55	604.02	340.68	313.54	533.5	326.23	516.87	621.41	377.78	410.61	533.54	335.44	333.28	529.07	372.2	462.1	692.95	396.31	409.69	512.04	369.17	338.03	517.94
ENSG00000078399|HOXA9	11.55	7.57	9.5	0	0	0	0	0	0.52	1.51	0.22	0	0	0	0	0	0	0	0	0	0	0	0	0	0	0	0	0	0	0.2	0	0.22	0	0	0	0
ENSG00000078401|EDN1	0.74	2.63	2.07	2.11	2.84	2.75	2.89	2.75	4.56	1.22	2.33	2.37	0.66	2.62	2.46	2.4	2.98	4.25	2.2	4.26	1.52	1.58	1.96	3.93	3.06	1.72	5.46	1.08	2.4	4.45	3.6	4.36	6.69	4	1.65	6.17
ENSG00000078403|MLLT10	60.57	70.44	54.31	48.47	55.02	41.39	46.14	56.94	53.47	41.15	56.4	50.4	46.51	39.15	45.53	57.25	26.63	58.53	56.06	56.75	50.75	76.36	48.91	53.68	97.67	56.27	47.14	43.21	43.69	30.52	56.09	59.69	42.83	47.64	55.96	42.67
ENSG00000078487|ZCWPW1	2.85	2.86	3.54	4.92	6.09	2.34	4.23	2.24	1.24	3.81	2.55	1.78	4.5	2.72	2.82	3.23	2.73	4.85	3.57	1.64	2.12	5.09	6.94	4.8	5.77	7.03	7.29	5.58	4.66	9.79	5.67	3.85	7.84	7.95	8.18	9.3
ENSG00000078549|ADCYAP1R1	14.98	11.68	85.33	11.99	23.56	58.13	55.04	56.38	41.4	28.47	93.58	117.11	35.99	100.45	109.88	25.71	16.1	71.34	29.32	84.44	120.88	32.31	29.33	48.7	23.77	19.71	52.92	9.84	19.45	45.54	12.19	14.34	51.33	19.99	13.5	54.42
ENSG00000078579|FGF20	0	0	0.19	0	0.22	0.57	0	0.19	0	0	0	0	0	0	0	0	0	0	0	0	0	0	0	0	0	0	0	0	0	0	0	0	0	0	0	0
ENSG00000078589|P2RY10	0	0	0	0	0	0	0	0	0	0	0	0	0	0	0	0	0	0	0	0	0	0	0	0	0	0	0	0	0	0	0	0	0	0	0	0
ENSG00000078596|ITM2A	7.05	5.69	0.19	2.43	2.99	1.04	1.21	1.19	0.54	2.83	1.26	3.53	7.29	2.95	3.21	0.93	3.99	3.48	1.52	1.29	0.36	1.36	1.82	3.15	1.33	0.69	1.13	0	2.25	6.79	0.15	1.16	2.47	0.55	0.18	0
ENSG00000078618|NRDC	151.25	136.72	190.85	144.92	162.38	180.88	154.26	182.2	160.55	139.29	161.22	176.51	130.8	156.27	166.5	156.98	112.46	161.06	154.51	161.46	189.69	146.9	134.94	143.28	151.41	148.47	156.04	141.63	153.73	150.41	146.35	167.27	154.95	141.87	139.41	167.4
ENSG00000078668|VDAC3	283.09	239.61	391.1	249.08	403.21	378.75	298.24	338.51	308.64	224.53	315.24	361.52	228.18	331.66	357.07	204.1	199.99	295.36	286.75	331.07	412.49	230.85	254.33	386.99	217.59	174.56	317.41	236.66	265.95	391.17	239.6	257.37	394.01	205.62	166.25	332.62
ENSG00000078674|PCM1	192.3	168.3	214.23	201.66	225.58	214.47	206.99	185.55	193.86	168.42	166.32	158.48	152.27	172.7	168.92	227.84	169.88	185.13	176.64	180.92	192.91	186.15	181.39	160.58	187.55	196.46	155.82	197.6	198.18	170.31	226.06	204.55	139.46	195.89	175.24	175.36
ENSG00000078687|TNRC6C	24.77	22.04	56.54	23.32	64.08	57.41	48.65	22.17	44.49	13.06	21.29	38.27	13.68	19.61	36.35	20.04	9.93	24.01	15.4	21.18	35.05	14.68	15.2	19.05	18.74	13.35	20.41	20.55	28.77	17.91	17.39	29.57	11.42	18.67	14.69	15.99
ENSG00000078699|CBFA2T2	43.6	50.57	40.15	37.75	47.61	52.32	37.66	28.02	39.55	58.52	48.56	37.49	60.21	49.32	36.16	64.68	28.36	55.83	57.97	51.08	40.11	66.66	70.31	50.53	71.8	54.22	48.86	64.68	41.39	74.28	75.5	49.59	82.17	84.9	67.08	61.84
ENSG00000078725|BRINP1	4.07	2.91	27.68	4.71	28.89	24.78	13.07	8.58	7.43	0.22	7.56	28.95	0.17	6.52	32.09	0	0.57	10.38	0.54	10.44	39.46	0.47	3.76	6.07	0	1.45	11.92	8.4	13.57	4.95	1.27	2.26	1.19	0	0.89	5.04
ENSG00000078747|ITCH	37.85	40.76	34.89	50.56	48.67	42.75	38.92	41	31.79	33.31	40.56	31.91	34.24	31.16	31.31	62.48	23.42	44.53	40.33	38.27	34.88	33.5	37.52	107.72	61.7	39.59	37.93	35.12	43.8	43.05	44.25	44.07	35.57	51.79	42.2	39.22
ENSG00000078795|PKD2L2	0	0	0.3	0.45	1.8	0.84	0.26	0.69	0.48	0.75	0	0.33	1.25	2.32	0.73	0	0	0.49	0	0.48	0.42	0	1.65	0.66	0	0.41	1.55	0.92	1.01	0.48	0.38	0.93	0.53	0	0.93	0.85
ENSG00000078804|TP53INP2	22.8	14.12	35.52	15.09	36.26	43.87	59.01	37.64	31.58	33.07	45.87	32.02	38.64	41.87	29.67	69.06	39.79	65.26	31.97	38.72	31.32	53.05	58.22	68	55.07	48.03	58.75	54.7	47.91	93.28	43.95	37.06	107.2	57.79	48.95	68.82
ENSG00000078808|SDF4	62.37	52.85	72.88	71.78	63.05	66.76	71.61	48.7	71.21	62.56	60.62	80.47	62.49	63.66	74.69	84.7	79.02	76.33	61.14	67.21	70.66	68.27	57.56	71.77	86.06	95.38	85.49	75.21	73.22	78.18	62.84	64.31	78.35	89.53	98.76	87.62
ENSG00000078814|MYH7B	3.01	2.08	0.89	1.3	3.38	1.38	1.21	0.22	1.54	1.5	1.71	1.03	0.76	1.8	1.59	3.75	1.51	2.25	2.17	1.3	2.09	3.51	2.84	2.05	2.94	0.99	2.41	2.56	1.96	3.95	1.98	1.14	1.96	2.63	1.1	1.51
ENSG00000078898|BPIFB2	0	0	0	0	0	0	0	0	0	0	0	0	0	0	0	0	0	0	0	0	0	0	0	0	0	0	0	0.15	0.14	0	0	0	0	0	0	0
ENSG00000078900|TP73	1.09	0.5	14.72	1.9	28.64	29.4	59.75	19.73	4.88	0.43	0.57	1.17	0.75	0.16	0.19	0.24	0.29	0.39	0.34	0.79	3.28	0.4	0.31	0.4	0.27	0.35	0.44	1.03	0.66	0.51	0.68	0.49	0.59	0.3	0.37	0.47
ENSG00000078902|TOLLIP	27.81	29.14	35.88	25.49	37.06	56.08	48.18	32.76	26.18	19.67	34.19	35.36	25.49	29.56	32.09	37.99	41.53	55.21	27.33	36.75	33.6	30.23	29.98	51.69	37.98	38.49	42.59	28.63	36.73	53.72	29.56	31.1	39.59	35.16	42.95	48.31
ENSG00000078967|UBE2D4	16.39	11.59	20.99	13.91	22.69	20.96	14.8	19.46	15.61	14.49	25.11	22.1	13.76	20.34	26.4	14.5	10.99	30.46	14.85	18.58	24.74	18.8	19.26	24.99	13.6	13.96	19.92	17.24	24.18	25.22	14.24	19.48	23.52	14.9	16.93	22.87
ENSG00000079101|CLUL1	3.39	5.16	40.16	15.62	42.36	41.96	49.12	29.92	30.41	4.39	20.03	35.06	6.81	21.37	25.34	0.77	2.08	31.04	5.81	20.79	33.26	0.63	3.54	28.8	1.15	0.63	22.34	0.16	1.28	27.91	0	0.64	20.48	3.28	0	17.89
ENSG00000079102|RUNX1T1	22.93	9.6	97.05	4.89	94.79	114.09	60.37	81.28	76.58	13.1	106.33	171.84	18.8	104.68	191.95	17.76	6.5	218.6	17.5	101.36	181.28	13.5	17.27	89.07	10.6	7.97	131.01	7.14	18.17	68.86	13.34	8.51	55.72	12.51	4.95	78.6
ENSG00000079112|CDH17	0	0.44	0	0	0.16	0	0.12	0	0	0.22	0	0	0	0	0.11	0	0	1.04	0	0.91	0	0	0.09	0	0.15	0	0.74	0	0.12	0	0	0	0	0	0	0
ENSG00000079134|THOC1	156.86	134.73	110.65	118.71	131.16	132.24	127.89	138.82	126.43	131.99	120.58	104.43	126.7	118.51	94.38	134.34	122.75	150.68	129.35	123.42	117.14	131.15	124.82	153.31	136.52	120.19	145.03	130.15	107.62	127.07	125.64	131.02	139.88	150.19	104.34	140.65
ENSG00000079150|FKBP7	24.67	12.81	29.69	12.09	28.94	26.71	25.8	32.55	20.13	13.94	18.87	22.55	22.39	16.7	25.72	19.39	15.59	19.85	26.21	14.29	24.83	20.56	21.1	34.82	26.97	16.8	27.81	21.41	24.65	39.35	18.09	19.76	39.24	23.94	22.07	33.39
ENSG00000079156|OSBPL6	3.33	4.2	18.98	2.48	19.95	18.65	11.05	9.19	16.58	14.89	9.7	16.51	13.43	8.84	15.66	45.03	32.56	24.51	4.93	6.99	12.94	20.56	23.21	20.84	27.01	28.91	28.31	13.7	15.11	26.35	15.93	14.3	25.34	19.49	21.71	21.11
ENSG00000079215|SLC1A3	93.67	87.37	3.28	67.16	2.47	2.48	12.16	33.28	115.57	323.83	111.89	3.8	372.37	184.72	2.81	457.69	242.01	14.25	214.19	128.68	8.75	495.14	481.74	40.62	386.97	600.59	20.27	185.46	257.57	22.77	190.42	300.25	35.91	262.56	389.12	22.56
ENSG00000079246|XRCC5	335.69	262.85	277.18	303.97	246.74	245.15	214.8	283.87	249.21	303.54	279.31	246.22	298.8	274.6	239.23	248.32	216.28	233.11	310.64	290.87	263.11	260.64	270.62	234.56	227	215.31	237.82	310.12	277.77	270.78	312.45	294.6	279.46	240.96	218.37	258.58
ENSG00000079257|LXN	3.8	4.82	0.97	6.92	1.92	0.66	2.58	2.33	2.12	5.51	2.36	0.34	4	2.4	1.32	7.72	5.4	2.2	2.81	3.69	0	8.54	6.21	3.32	3.53	2.88	2.43	3.8	3.15	1.62	3.15	5.32	1.35	0.94	2.4	1.08
ENSG00000079263|SP140	0.08	0.51	1.75	0.22	1.61	5.42	2.19	0.3	0.41	0.08	0.09	0.68	0	0.09	1.35	0.25	0.13	1.54	0.09	0.19	0.08	0.17	0.15	0.2	0.29	0.35	2.83	1.08	0.27	0.22	0	1	0.28	0.47	0.27	0.57
ENSG00000079277|MKNK1	17.51	17.48	18.48	20.69	21.76	17.39	19.96	12.69	19.91	18.9	20.38	15.27	19.71	13.57	15.75	20.36	9.97	11.93	18.81	11.97	21.95	18.74	15.15	15.12	28.4	29.89	14.77	41.37	24.52	15.2	30.88	40.24	22.71	17.49	19.94	14.41
ENSG00000079308|TNS1	8.76	8.34	3.56	7.77	7.55	5.11	8.51	3.47	1.87	15.23	4.29	1.13	12.56	6.85	1.41	11.08	3.04	0.36	16.45	7.13	0.77	10.6	11.71	0.84	5.32	9.33	0.5	11.76	7.55	0.62	6.05	12.72	0.22	4.47	4.49	0.1
ENSG00000079313|REXO1	27.6	24.32	42.43	23.26	35.73	47.08	37.47	13.22	28.61	27.96	22.8	24.77	25.54	24.39	23.87	26.14	26.25	24.85	23.6	20.62	25.82	31.2	29.38	31.28	25.3	32.51	38.07	41.77	22.78	36.01	35.16	28.17	45.26	36.31	33.65	46.09
ENSG00000079332|SAR1A	90.94	75.26	76.67	77.4	80.69	75.68	75.61	81.11	72.82	94.43	86.31	82.54	92.77	82.42	83.1	104.37	58.54	96.7	92.17	85.27	78.61	104.53	104.52	87.79	104.4	104.93	95.36	108.56	112.46	103.52	97.34	100.79	96.05	100.59	94.41	100.48
ENSG00000079335|CDC14A	13.01	17.54	0.83	17.83	2.5	2.05	3.7	7.33	6.54	9.32	3.57	1.01	12.92	4.06	1.28	10.84	6.55	0.81	13.3	5.56	0.99	12.71	10.44	1.91	7.9	6.7	0.22	10.36	6.83	1.02	8.26	7.02	1	5.66	6.62	0.53
ENSG00000079337|RAPGEF3	4.25	2.37	5.52	1.23	4.75	7.75	1.87	2.81	2.05	4.02	5.73	13.41	2.98	7.35	6.94	7.08	5.64	10.16	4.11	5.11	9.52	3.1	3.48	6.6	11.45	6.65	14.08	3.12	6.81	6.37	4.05	5.66	7.88	8.63	4.96	23.73
ENSG00000079385|CEACAM1	0.22	2.03	0.28	0.59	1.07	0.47	0.23	0.09	0.25	0	0.16	2.43	0	0	2.33	0.37	0	0.33	4.06	0.42	0	2.09	0.14	0.27	0.35	0.89	0.37	0	0	0.6	0.74	4.15	0	0.34	0.08	0.24
ENSG00000079387|SENP1	26.29	17.75	15.61	20.63	24.19	15.17	20.63	19.65	18.92	16.24	15.74	15.92	17.65	24.36	13.48	23.15	6.76	19.87	20.54	18.13	13.91	17.22	21.97	20.35	21.02	19.69	19.91	28.72	27.32	29.24	26.53	19.87	28.7	20.79	20.32	26.69
ENSG00000079393|DUSP13	0	0	0	0	0	0	0	0	0.54	0	0	0	0	0	0	0	0	0	0	0	0	0	0	0	0	0	0	0	0	0	0	0	0	0	0	0
ENSG00000079432|CIC	62.59	63.06	94.23	70.13	91.21	100.88	98.51	50.27	90.75	82.09	86.59	95.32	69.54	92.53	115.44	90.54	54.02	116.28	82.38	96.77	104.79	65.99	85.47	104.82	79.87	68.43	108.93	77.29	83.41	98.59	91.98	87.64	112.44	86.37	67.52	103.57
ENSG00000079435|LIPE	17.39	17.46	28.3	17.63	16.01	10.55	20.13	9.16	14	18.76	22.11	19.01	16	21.75	15.75	18.66	12.34	8	18.1	18.09	19.17	11.36	10.67	9.3	11.79	10.57	12.52	13.44	12.4	13.17	12.22	14.35	9.58	14.38	7.89	14.28
ENSG00000079459|FDFT1	616.68	515.37	524.09	505.94	291.58	436.4	405.43	647.26	471.52	607.77	697.95	571.17	548.57	592.23	487.42	273.6	215.14	229.32	658.86	732.61	636.53	368.07	306.96	287.65	221.4	162.83	217.27	167.33	160.29	95.31	192.8	175.74	99.47	165.37	139.18	154.42
ENSG00000079462|PAFAH1B3	163.15	126.05	348.25	153.39	307.12	343.49	325.53	279.69	285.43	162.58	337.42	403.95	187.53	336.09	359.45	143.35	246.72	278.43	191.89	310.33	374.68	167.73	184.75	317.3	140.39	148.5	327.8	177.69	202.38	268.94	191.18	206.92	310.48	190.58	161.77	269.62
ENSG00000079482|OPHN1	29.37	42.44	34.75	23.52	37.46	35.48	33.72	28.56	41.36	40.53	40.16	32.85	40.97	36.01	45.77	52.72	27.51	41.19	41.92	34.93	38.27	54.36	52.09	49.46	46.84	45.27	44.8	40.59	45.19	46.77	44.17	47.59	54.45	34.96	34.52	41.23
ENSG00000079557|AFM	0	0	0	0	0	0	0	0	0	0	0	0	0	0	0	0	0	0	0	0	0	0	0	0	0	0	0	0	0	0	0	0	0	0	0	0
ENSG00000079616|KIF22	127.26	137.2	33.71	133.19	44.92	34.41	32.46	42.9	87.37	111.84	59.06	27.18	114.2	61.49	18.34	80.21	99.74	21.78	131.95	76.94	23.59	136.81	132.29	27.08	55.92	87.38	29.49	169.38	120.02	51.05	156.35	135.48	30.99	48.34	72.95	38.09
ENSG00000079689|SCGN	1.89	1.23	0	0.77	1.69	0.49	1.21	1.46	3.6	0	0.22	0	0	0.22	0	0.97	32.11	0	0	0	1.8	16.09	72.73	1.16	0	0.41	0	129	314.17	8.71	85.66	165.66	10.45	0.88	5.22	0
ENSG00000079691|CARMIL1	27.23	20.73	19.7	20.46	10.85	8.25	11.08	10.34	29.46	21.65	5.79	13.39	19.7	4.01	19	17.76	12.3	1.12	26.47	9.3	15.08	20.05	20.37	2.68	11.58	15.43	3.15	15.43	25.84	3.96	13.64	23.51	1.1	10.63	17.63	0.75
ENSG00000079739|PGM1	58.52	59.2	11.29	69.11	5.09	9.84	7.73	15.04	23.45	55.83	26.68	12.93	49.52	31.27	15.78	35.44	42.91	8.53	58.37	26.75	13.09	49.56	38.62	10.43	25.19	38.07	9.57	31.1	29.45	10.1	25.91	28.84	9.88	21.24	29.43	9.42
ENSG00000079785|DDX1	179.1	131.38	210.43	164.99	187.77	179.62	166.59	208.62	173.02	160.97	194.31	168.81	168.52	177.11	159.18	153.03	165.52	185.84	177.45	193.98	183.2	123.48	138.23	173.33	175.42	153.45	166.6	141.33	156.29	183.56	137.19	140.43	176.57	145.88	161.62	195.65
ENSG00000079805|DNM2	54.66	55.94	50.42	47.41	47.15	38.51	55.3	34.64	42.09	43.88	41.86	52.82	46.29	42.54	40.6	63.22	22.47	52.18	53.75	48.84	41.67	46.04	48.86	38.31	55.77	54.02	41.07	54.37	53.23	42.15	54.18	61.4	49.07	58.42	58.37	55.89
ENSG00000079819|EPB41L2	39.75	38.96	14.18	34.55	23.61	16.18	8.66	20.83	28.75	44	29.78	6.8	38.11	20.65	5.02	53.18	18.98	24.55	39.77	27.16	3.69	62.62	63.94	48.86	32.05	32.87	23.96	48.07	51.16	64.06	36.94	39.95	34.09	33.13	30.1	33.05
ENSG00000079841|RIMS1	1.38	1.83	16.55	1.34	24.55	21.43	16.88	13.36	5.76	3.58	7.91	7.59	2.91	7.3	6.1	3.58	1.66	12.34	3.18	6.11	8.39	2.71	5.97	6.95	3.2	3.4	9.84	3.31	6.42	8.07	1.96	3.08	8.72	2.9	2.78	10.96
ENSG00000079931|MOXD1	11.51	14.86	3.87	3.95	1.85	1.69	0.26	3.14	28.57	10	5.96	0.79	15.51	11.32	0.48	47.38	79.34	5.65	2.19	3.97	0.83	83.72	118.77	11.04	39.1	93.65	7.2	129.6	146.84	8.76	109.33	156.65	6.69	24.26	77.78	6.55
ENSG00000079950|STX7	31.45	36.05	101.18	41.45	100.44	90.91	78.06	94.61	83.58	38.31	87.85	85.83	50.1	100.58	69.96	68.77	27.78	96.84	44.99	80.56	79.53	48.27	64.15	94.45	53.1	48.51	87.41	42.09	73.74	65	49.93	61.82	74.81	55.39	43.01	71.62
ENSG00000079974|RABL2B	46.52	32.8	61.87	45.69	76.27	50.06	63.19	40.53	48.32	32.74	45.5	52.08	44.52	42.15	71.23	36.38	20	62.89	36.82	46.48	64.27	34.3	37.15	58.06	38.68	40.06	73.81	29.87	42.57	50.98	34.74	43.87	48.38	43.13	39.57	68.46
ENSG00000079999|KEAP1	39.43	31.25	27.33	39.48	26.83	22.51	22.02	22.83	21.79	47.51	25.2	20.32	37.47	32.15	19.15	42.75	63.79	31.97	46.38	28.91	18.1	44.41	40.71	28.36	44.13	43.72	31.24	46.76	42.38	37.24	39.27	36.64	49.14	46.46	46.15	34.73
ENSG00000080007|DDX43	0	0	0	0	0	0.8	0	0	0	0	0	0	0	0	0	0	0	0	0	0	0	0	0	0	0	0	0	0	0	0	0	0	0	0	0	0
ENSG00000080031|PTPRH	0.63	0.79	1.66	0	1.02	1.5	0.38	0.37	0.2	0	0.13	0.27	0	0	0.09	0	0	0.29	0	0.08	0.09	0.07	0	0.45	0	0	0	0.52	0	0.46	0	0	0	0	0	0.83
ENSG00000080166|DCT	2.7	8.53	0.4	2	0.19	0.49	0.09	0.8	0.27	1.03	0.2	0.14	0.55	0.25	0.04	2.66	1.14	0.09	0.74	0.47	0.35	0.73	0.48	0	0.8	1.64	0.04	5.49	3.32	8.1	1.76	1.96	0.11	0.82	0.48	0.46
ENSG00000080189|SLC35C2	29.34	32.8	35.54	37.03	35.9	32.97	33.98	32.17	38.94	38.49	27.51	24.66	36.12	27.08	26.29	38.88	34.54	37.98	34.11	33.3	26.96	34.26	31.07	29.52	43.81	44.01	43.27	33.37	35.73	36.43	36.06	44.44	36.56	49.23	58.46	45.19
ENSG00000080200|CRYBG3	9.17	7.22	0.89	7.47	4.84	1.99	3.5	4.96	4.86	6.77	2.2	0.03	7.38	2.82	0.02	6.14	0.99	0.31	7.38	1.97	0.22	9.81	5.27	0.45	6.69	6.7	0.2	6.75	3.64	5.59	2.1	4.12	0.59	3	4.05	0.91
ENSG00000080224|EPHA6	4.85	6.29	6.34	5.64	7.66	6.8	3.9	2.08	3.14	1.79	0.27	1.08	2.09	0.6	2.71	0.86	0.99	6.92	4.84	0.93	1.49	0.84	0.22	2.18	1.03	1.36	4.29	1.22	0	1.91	0.49	0.31	0.62	0.24	0.29	2.6
ENSG00000080293|SCTR	0.43	0.24	0.13	0	0.2	0.68	0	0	0	0	0	0	0	0	0	0	0	0	0	0	0	0	0	0	0	0	0	0.15	0	0.41	0	0	0	0	0	0.14
ENSG00000080298|RFX3	29.99	28.94	48.55	31.79	50.97	48.82	48.73	49.49	46.1	26.93	28.67	21.34	27.98	24.64	21.45	35.65	11.57	24.5	29.31	29.25	26.55	30.11	30.15	21.49	33.15	29.3	24.61	28.91	29.15	20.18	32.14	33.4	23.74	27.44	25.18	22.53
ENSG00000080345|RIF1	49.91	38.21	30.61	40.02	29.95	30.46	26.5	33.71	34.52	33.67	26.21	22.39	31.62	26.91	23.7	47.61	16.28	41.57	35.23	25.38	30.11	37.6	45.98	30.78	37.54	32.5	32.09	42.47	42.88	42.69	44.33	40.77	44.03	34.2	28.72	34.51
ENSG00000080371|RAB21	68.09	57.66	53.4	51.02	70.25	54.23	46.12	51.44	44.39	45.79	42.02	39.19	43.54	45.32	47.14	68.74	44.83	58.95	46.78	28	30.45	66.32	61.2	49.68	58.42	64.77	39.97	64.85	66.49	56.39	64.68	65.24	42.38	49.63	54.11	46.55
ENSG00000080493|SLC4A4	2.73	5.08	3.86	3.1	0.83	0.86	0.82	0.75	2.45	3.87	2.9	0.07	4.32	1.99	0.04	6.93	5.6	0.08	1.66	1.46	0.25	13.02	19.67	2.6	6.34	10.72	0.58	6.74	10.15	6.21	8.01	8.35	3.7	3.71	7.48	0.71
ENSG00000080503|SMARCA2	27.6	27.21	141.49	29.98	52.83	98.31	86.96	100.27	55.93	38.02	84.81	131.76	46.66	82.41	165.69	214.14	167.18	100.88	41.09	61.69	185.05	125.96	113.02	93.27	118.97	138.71	103.21	158.46	124.11	124.19	141.68	144.39	155.21	75.36	157.35	91.44
ENSG00000080511|RDH8	0	0	0	0	0	0	0	0	0	0	0	0	0	0	0	0	0	0	0	0	0	0	0	0	0.7	0	0	0	0	0	0	0	0	0	0	0
ENSG00000080546|SESN1	12.44	10.42	22.41	11.4	29.62	30.89	18.35	19.52	23.47	20.12	22.33	17.95	16.83	24.34	20.4	27.99	12.78	37.24	15.76	20.13	29.86	16.02	28.4	50.45	24.71	25.47	40.87	32.89	33.1	57.04	33.68	26.93	69.92	24.67	22.57	42.56
ENSG00000080561|MID2	1.94	2.23	3.75	5.04	9.28	4.89	3.1	3.92	2.28	1.67	0.78	0.28	1.38	1.1	0.93	1.65	0.32	1.52	1.26	0.25	0.25	2.04	1.73	0.94	1.44	1.06	0.5	1.1	2.33	0.92	0.6	1.16	0.14	1.03	1.1	0.33
ENSG00000080572|PIH1D3	0	0.14	0.19	0	0	0	0	0	0	0	0	0.19	0	0.17	0.32	0	0	0	0	0	0	0.67	0	0	0	0	0	0	0	0	0	0.35	0	0	0.18	0
ENSG00000080573|COL5A3	0.25	0.09	0.34	0.39	0	0.65	0.27	0.09	0.04	0.07	0.04	0.05	0.12	0.16	0.04	1.43	1.03	0.05	0.34	0.04	0.07	2.29	2.22	0.17	1.89	2.15	0.14	1.56	5.23	1.18	2.21	4.11	0.09	1.4	2.04	0
ENSG00000080603|SRCAP	26.97	27.2	36.43	38.2	36.18	35.91	39.03	20.74	31.42	20.39	25.42	22.1	22.43	27.04	26.63	34.27	2.94	42.89	30.82	29	29.09	21.02	24.41	26.31	32.11	28.06	33.51	34.62	32.39	41.48	31.3	27.29	43.59	38.38	36.76	41.44
ENSG00000080608|PUM3	22.51	26.37	16.32	25.59	13.57	15.42	13.27	27.99	16.37	25.39	20.38	23.79	21.24	21.13	15.96	23.11	27.41	30.91	19.94	17.73	16.07	20.74	17.14	20.25	30.31	20.15	25.27	27.49	31.22	26.03	22.59	22.84	37.86	27.85	21.9	25.15
ENSG00000080618|CPB2	0.17	0	0.2	0	0	0.42	0	0	0	0	0	0	0.18	0	0.17	0	0	0.23	0	0	0	0	0	0	0	0	0	0	0.18	0.17	0	0	0	0.39	0.19	0
ENSG00000080644|CHRNA3	9.01	17.11	5.64	11.3	5.58	3.08	14.9	11.15	14.49	15.06	5.98	1.36	17.09	4.4	1.79	10.87	4.62	1.92	18.78	7.09	1.43	8.93	7.2	3.08	11.25	8.49	1.84	20.65	8.39	59.06	2.63	2.42	1.1	8.3	3.34	1.91
ENSG00000080709|KCNN2	1.19	1.63	4.58	1.91	4.54	5.14	4.16	2.84	7.05	4.04	5.95	11.35	3.23	9.48	23.63	1.45	2.63	9.84	2.77	4.46	20.51	2.91	0.81	11.21	0.72	1.63	6.81	0.66	2.19	6.3	1.29	2.45	8.76	1.17	0.21	6.8
ENSG00000080802|CNOT4	27.14	26.13	33.84	25.75	37.27	31.21	33.45	33.17	33.53	26.18	33.47	30.59	30.02	28.77	29.41	31.39	22.93	36.58	26.16	27.96	31.19	31.48	28.4	40.46	28.48	30.06	30.82	30.47	35.2	35.6	32.16	33.35	33.73	26.51	28.16	34.89
ENSG00000080815|PSEN1	57.29	55.8	56.22	68.19	58.22	55.53	64.35	65.75	56.17	78.55	72.95	66.39	67.29	67.5	71.42	95.57	53.89	85.52	64.26	69.47	64.15	71.57	84.98	94.24	103.57	77.63	83.3	85.22	94.38	95.1	87.33	76.71	109.48	104.43	88.3	111.48
ENSG00000080819|CPOX	15.05	19.58	14.29	20.11	22.83	24	21.87	12.57	20.63	17.57	14.94	19.14	17.42	17.5	15.55	20.48	19.87	28.24	16.08	22.32	16.34	21.75	18.84	21.53	19.56	22.64	18.28	19.06	18.83	19.24	18.3	19.65	18.97	10.41	13.52	17.13
ENSG00000080822|CLDND1	124.4	92.53	87.26	95.91	127.26	104.79	101.43	113.69	101.63	126.76	103.25	96.81	141.75	136.58	88.98	160.52	100.33	116.33	120.99	120.67	98.31	179.59	161.64	117.29	179.03	193.16	117.79	165.82	167.33	154.97	149.49	177.08	131.02	158.45	188.15	106.42
ENSG00000080823|MOK	28.21	23.52	54.11	25.39	67.4	60.25	52.74	46	46.43	15.42	28.82	37.89	20.96	37.18	49.63	22.62	16.72	45.17	19.02	32.54	46.78	25.34	25.5	48.52	22.06	21.97	56.59	24.51	30.07	62.18	24.2	22.25	33.76	20.53	24.02	41.51
ENSG00000080824|HSP90AA1	1309.04	2200.95	1589.69	980.55	1380.34	1569.56	1336.92	1545.49	1856.05	934.88	1204.47	1139.77	1061.71	1116.91	1059.16	1360.62	1797.53	1400.1	1043.16	1110.71	1071.24	1251.27	1166.68	1391.08	1166.8	1117.56	1411.95	1283.89	1226.21	1633.46	1203.92	1077.66	1611.31	930.7	850.75	1405.69
ENSG00000080839|RBL1	16.98	20.77	6.15	22.33	8.27	9.86	5.84	9.46	14.18	20.47	12.07	5.42	20.45	11.24	4.93	17.47	7.57	13.29	21.38	12.53	8.28	22.18	26.37	7.45	11.52	14.55	7.98	24.62	21.95	8.36	24.65	29.91	6.97	9.86	15.94	9.57
ENSG00000080845|DLGAP4	108.96	88.92	208.23	90.2	210.31	187.86	203.57	153.23	211.27	126.95	256.82	256.49	127.26	238.85	253.44	153.88	64.98	255.95	114.24	221.87	201.39	143.02	133.38	276.06	168.2	110.37	232.71	142.41	144.09	234.95	155.94	156.44	245.68	162.81	123.72	234.06
ENSG00000080854|IGSF9B	9.17	9.01	36.38	10.43	11.51	14.38	34.47	10.15	13.2	1.51	5.67	30.62	3.93	9.28	17.28	4.4	1.67	18.52	4.27	16.06	19.19	3.16	17.15	4.87	3.21	3.66	2.92	19.24	41.38	7.1	17.28	23.91	4.69	4.46	5.07	10.38
ENSG00000080910|CFHR2	0.78	0.7	0	0.6	0	1.15	0.24	0.52	0.48	0.35	0.23	0.21	0.23	0	0.79	0	0.59	0.58	0.67	0.24	0.58	0.22	0.2	0	0.25	0.45	0.64	0.14	1.47	0.29	0.13	0.32	0.27	0	0.24	0.8
ENSG00000080986|NDC80	49.14	49.61	1.98	44.94	0.97	1.94	4.22	11.43	27.04	43.96	16.55	0.72	35.13	19.91	0.89	31.6	37.72	2.79	38.4	24.24	1.98	58.47	52.42	1.33	45.5	45.92	2.06	53.14	35.66	3.16	54.58	53.39	1.65	14.65	25.97	2.1
ENSG00000081014|AP4E1	10.4	11.3	13.1	10.7	12.04	11.23	14.34	13.17	13.82	12.64	10.7	13.32	12.61	10.42	12.62	13.17	3.98	12.69	12.95	14.56	11.2	11.7	10.83	9.86	17.05	13.34	9.06	15.28	15.8	15.49	11.75	11.02	13.77	14.95	13.88	10.84
ENSG00000081019|RSBN1	26.39	28.84	35.73	34.87	43.27	39.28	35.13	34.75	29.26	21.32	39.06	32.55	28.6	31.39	33.8	28.94	16.72	39.44	28.13	31.55	31.62	22.6	29.03	38.71	29.53	25.79	33.77	28.4	34.78	44.8	28.69	28.07	45.23	30.84	21.98	41.6
ENSG00000081026|MAGI3	21	22.93	23.36	18.68	28.84	30.05	26.87	27.49	23.9	22.2	20.48	21.65	21.42	18.32	26.23	21.37	14.25	24.99	16.9	20.27	19.1	24.2	27.65	26.65	19.63	18.22	20.51	40.73	41.13	33.81	48.28	44.9	37.67	24.7	19.28	25.28
ENSG00000081041|CXCL2	0	0.43	0	0	0	0	0	0	0	0	0	0	0	0	0	0	0.18	0	0	0.97	0	0.25	0.77	0	0	0.25	0	2.07	0.51	0.89	0.21	0	0	0.55	0.98	0
ENSG00000081051|AFP	4.25	0.24	0.16	0	0	0	0	0	1.77	0	0	0	0	0	0	0	0	0	0	0	0	0	0	0	0	0.14	0	0	0	0	0	0	0	0	0	0
ENSG00000081052|COL4A4	0.06	0.08	0.03	0.04	0.06	0.11	0.09	0	0.07	0.02	0.02	0	0.12	0.02	0	0.04	0.03	0.12	0.07	0.05	0.07	0.05	0.04	0.11	0.13	0.16	0.04	0.05	0	0.04	0.1	0.12	0.08	0.07	0.02	0.04
ENSG00000081059|TCF7	3.15	2.49	1.12	3.82	1.84	2.41	3.97	2.02	2.18	1	1.16	0.72	2.73	1.61	0.34	1.2	0.69	1.07	2.42	1.1	1.13	1.92	1.7	1.1	1.26	1.9	0.41	4.43	2.21	2.51	4.17	3.35	1.74	3.26	1.8	0.91
ENSG00000081087|OSTM1	24.68	30.52	42.47	27.34	41.53	32.04	35.56	29.4	38.56	24.3	23.28	32.8	27.54	25.49	43.82	41.72	35.72	42.92	32.24	27.14	37.73	27.52	35.29	33.83	42.04	42.02	39.94	35.28	41.25	50.7	34.95	33.58	35.83	45.87	48.76	39.37
ENSG00000081138|CDH7	3.55	4.89	27.17	3.68	14.29	19.64	23.06	11.83	12.14	0.98	10.8	63.33	1.15	9.35	60.59	0.51	0.26	1.08	1.52	10.65	62.26	0.56	0.67	2.5	0.26	0.5	0.66	4.33	0.8	1.17	0.34	0.25	0.42	0.37	0.52	0.69
ENSG00000081148|IMPG2	0.49	0.23	1.32	0.36	2.42	1.85	1.48	0.9	1.02	0.55	0.85	0.71	0.54	0.53	0.83	0.59	0.2	0.44	0.72	0.85	1.22	0.5	0.42	0.51	0.09	0.26	0.61	3.02	2.76	22.03	0.51	0.41	0.61	0.45	0.5	0.76
ENSG00000081154|PCNP	218.02	243.52	176.18	201.97	241.87	210	205.74	195.15	229.85	232.64	169.49	146.68	200.84	169.16	158.17	241.6	183.92	242.55	237.53	175.83	155.76	244.87	247.54	199.57	270.44	251.6	232.54	215.82	222.78	227.83	237.67	209.19	217.68	247.53	245.54	240.98
ENSG00000081177|EXD2	28.37	31.54	49.85	33.95	50.6	56.31	43.37	57.7	35.93	34.99	43.26	42.54	35.52	46.8	51.93	40.09	28.96	62.1	38.76	45.62	56.38	35.82	38.16	55.46	41.96	41.94	52.2	30.26	38.38	57.12	24.61	28.73	52.84	38.02	32.55	55.42
ENSG00000081181|ARG2	23.86	17.99	75.04	21.11	81.22	61.83	54.96	47.71	45.01	14.04	52.63	95.96	19.87	59.58	102.92	8.43	10.57	68.3	17.63	51.55	109.81	11.89	18.62	53.64	8.99	8.1	52.88	5.93	12.49	30.87	8.23	9.77	45.64	4.77	3.72	50.6
ENSG00000081189|MEF2C	3.5	3.78	34.93	4.57	25.39	26.86	15.24	18.6	9.9	4.1	11.93	107.62	3.88	14.43	75.48	15.79	1.85	282.4	4.18	14.37	77.93	8.13	9.62	148.6	4.73	4.21	223.87	6.87	13.83	76.49	4.15	6.11	54.08	2.13	4.13	142.72
ENSG00000081237|PTPRC	0.26	0	0.06	0.14	0.07	0	0.22	0.18	0	0	0	0	0.27	0	0	0	0	0	0.1	0	0	0.05	0.19	0.51	0.25	0.28	0.34	0.05	0	0.05	0.04	0.28	0.32	0.24	0	0.05
ENSG00000081248|CACNA1S	0	0	0	0	0	0.05	0.08	0.09	0	0	0	0.05	0	0	0	0	0	0	0	0	0	0	0.03	0	0	0	0	0	0	0.11	0	0	0	0	0	0
ENSG00000081277|PKP1	0	0	0	0	0	0	0	0	0	0	0	0	0	0	0	0	0	0	0	0	0	0	0	0	0	0	0.08	0.05	0.05	0.17	0	0	0	0	0	0
ENSG00000081307|UBA5	76.02	68.76	98.85	80.4	84.58	91.91	79.13	82.59	63.72	67.92	70.5	86.49	68.82	75.35	83.81	88.98	78.52	102.79	91.09	78.85	85.89	76.4	85.41	87.07	97.08	90.55	83.18	71.64	75.92	97.81	88.68	78.94	99.5	101.42	79.42	78.48
ENSG00000081320|STK17B	18.65	14.97	25.69	13.63	4.46	12.6	12.42	21.58	23.82	15.04	17.05	6.62	16.08	10.87	3.62	22.3	6.02	1.43	15.61	14.97	8.41	14.3	11.83	2.01	15.29	17	1.24	7.68	5.44	1.2	8.61	10.31	0.38	9.29	10.04	1.15
ENSG00000081377|CDC14B	16.93	19.29	13.9	17.58	17.57	13.49	17.09	11.08	20.74	24.22	14.46	11.31	13.3	12.87	14	21.02	10.55	12.27	15.79	15.81	9.39	20.38	21.88	17.91	23.13	23.56	14.14	16.69	23.98	11.58	17.27	20.83	9.71	17.28	17.3	15.87
ENSG00000081386|ZNF510	28.43	23.9	39.64	23.12	39.54	31.49	33.18	31.31	33.8	20.97	29.8	32.02	26.69	30.65	34.09	37.32	11.56	55.73	24.5	30.17	33.19	26.42	29.06	43.79	37.04	34.52	44.53	33.93	36.89	55.43	35.56	28.41	57.28	47.76	35.79	61.25
ENSG00000081479|LRP2	4.87	18.55	1.09	5.4	3.54	1.84	2.76	3.94	5.56	0.2	0.24	0	0.36	0.14	0	0.37	1.13	0.06	0.45	0.08	0.13	2.89	1.03	1.3	0.23	0.54	0	4.47	1.33	3.58	0.84	1.06	0	0.27	0.2	0.06
ENSG00000081665|ZNF506	33.66	26.8	48.48	28.81	60.82	48.79	55.64	39.55	46.71	33.07	44.19	38.82	35.7	40.84	42.22	49.06	22.68	63.06	32.49	40.22	39.65	39.12	51.3	65.55	54.68	44.37	49.33	39.77	41.63	64.41	42.07	49.58	68.09	52.8	36.3	65.36
ENSG00000081692|JMJD4	9.28	11.38	8.21	9.33	12.33	10.68	11.06	11.09	10.11	5.59	4.38	9.95	10.01	7.31	8.75	11.33	14.58	16.44	10.87	7.19	8.82	5.97	4.61	13.07	11.28	16.2	12.13	11.19	6.74	10.15	9.15	9.02	10.45	12.16	14.89	15.61
ENSG00000081721|DUSP12	75.69	55.92	96.63	51.31	108.92	111.09	88.16	89.35	59.58	53.69	64.65	72.94	64.14	77.69	77.39	83.14	71.75	97.01	58.49	68.03	88.71	50.88	50.89	89.39	61.01	67.12	105.61	73.23	65.27	97.11	73.6	64.24	98.1	79.52	88.3	105.88
ENSG00000081760|AACS	25.29	31.32	38.08	27.3	37.05	45.12	33	30.71	32.68	32.53	56.78	51.25	39.67	62.89	47.71	38.22	35.07	41.89	37.52	60.54	47.61	30.98	31.19	46.06	40.98	27.75	39.47	26.4	23.57	41.04	28.93	25.23	35.07	37.93	27.64	43.78
ENSG00000081791|DELE1	36.2	33.76	37.78	39.28	67.26	45.37	37.04	33.3	34.1	42.98	28.63	28.82	36.78	34.42	30.69	44.3	31.09	37.05	35.31	34.18	27.85	36.42	39.88	34	38.42	42.91	34.92	31.85	34.54	32.96	30.1	23.3	42.28	34.08	30.82	31.74
ENSG00000081800|SLC13A1	0	0	0	0	0	0	0	0	0	0.06	0	0	0.06	0	0	0	0	0	0	0	0	0	0.06	0	0.25	0	0	0	0	0	0	0	0	0.07	0	0
ENSG00000081803|CADPS2	2.02	2.8	3.41	2.63	9.24	4.8	6.1	2.68	4.44	0.44	0.35	0.14	0.87	0.13	0.11	1.12	1.22	0.3	1.23	0.44	0.51	0.67	1.1	1.17	1.4	1.68	0.27	2.23	0.94	0.34	0.1	0.63	0	1.83	1.8	1.09
ENSG00000081818|PCDHB4	3.78	2.2	6.14	2.08	7.01	5.29	5.27	2.72	5.96	4.01	4.26	5.69	4.27	3.72	4.99	4.8	2.09	6.17	4.3	4.29	5.69	6.15	5.96	7.26	4.75	5.22	7.04	5.77	4.61	7.6	6.15	4.35	7.22	6.65	3.65	7.9
ENSG00000081842|PCDHA6	2.01	1.28	1.98	0.85	4.24	2.76	1.86	2.54	1.74	1.18	2.39	2.13	1.08	1.85	2.95	0.66	1.86	2.33	1.32	2.02	3.04	1.62	2.3	3	1.68	0.75	3.62	1.12	1.95	2.46	2.29	1.74	2.06	0.83	0.91	1.81
ENSG00000081853|PCDHGA2	0.64	0.4	0.94	0.49	1.44	0.49	1.29	0.61	0.83	0.46	0.52	0.24	0.9	0.72	0.47	0.46	0.31	0.83	0.96	1.07	0.19	0.64	0.79	0.79	0.29	0.53	0.3	0.58	0.62	1.2	0.78	1.13	0.56	0.74	0.39	1.08
ENSG00000081870|HSPB11	64.02	52.32	41.67	59.75	36.44	41.68	28.42	37.2	40.59	63.08	48.65	37.1	57.82	45.08	36.11	39.84	49.35	28.93	57.82	43.72	37.79	66.96	70.74	41.78	36.58	40.46	34.26	43.05	48.43	46.25	60.95	67.68	54.21	32	29.59	34.37
ENSG00000081913|PHLPP1	44.52	51.24	11.5	48.31	19.82	23.05	17.91	11.99	30.76	51.8	30.95	11.11	47.22	28.67	14.51	38.3	17.78	16.63	54.21	34.89	14.17	45.98	34.05	17.36	31.4	32.16	15	33.97	30.56	22.27	42.89	38.03	20.98	21.79	22.55	15.09
ENSG00000081923|ATP8B1	0.18	0.17	0.18	0.15	0.26	0.05	0.08	0	0.04	0	0.5	1.3	0	0	0	2.24	0.06	0.15	0	0.09	0.04	0.19	0.07	0.18	1.84	0	0.13	0	0.12	0.19	0	1.22	1.43	0.17	0.08	0.11
ENSG00000081985|IL12RB2	0.06	0.11	0	0.12	0	0.15	0.26	0.08	0.07	0.18	0.14	0	0.2	0.07	0.06	0.06	0.29	0.08	0	0.07	0	0.19	0.17	0.3	0.07	0.13	0.12	0	0.2	0.61	0.28	0.54	0.15	0.14	0.34	0.56
ENSG00000082014|SMARCD3	78.03	88.8	191.36	89.86	225.84	190.07	180.96	88.26	138.52	131.08	245.45	241.42	165.77	272.28	237.22	395.23	266.61	299.3	136.51	223.62	259.93	260.52	263.1	339.19	439.11	277.66	313.77	178.18	154.64	268.8	313.02	222.65	428.43	473.23	316.9	251.42
ENSG00000082068|WDR70	39.43	26.93	23.52	35.1	45.28	41.01	35.12	34.02	24.48	46.07	28.31	29.95	29.76	25.17	26.63	34.41	39.72	57.67	37.13	36.06	31.23	28.55	19.8	38.03	43.49	23.43	37.17	34.12	27.66	30.42	26.67	32.9	42.26	26.32	37.57	41.29
ENSG00000082074|FYB1	0	0	0.11	0	0.56	0.11	0	0.18	0	0	0.11	0	0	0	0.05	0	0	0	0	0	0	0.05	0	0.93	0	0	0.44	0	0.1	0.05	0	0.16	0	0	0.05	0.05
ENSG00000082126|MPP4	0.33	0.1	0.53	0.23	0.8	0.69	0.89	0.38	0.12	0.28	0.54	3.58	0.34	0.5	0.64	0.96	0.09	1.22	0.67	1.14	0.66	0.35	0.1	0.85	0.55	0.23	1.25	0.9	3.1	20.94	0.63	0.64	0.89	0.25	0.52	0.88
ENSG00000082146|STRADB	37.13	37.52	60.18	47.02	51.18	49.61	55.1	49.72	58.08	37.61	38.09	47.84	37.97	36.06	67.26	27.04	11.92	60.29	37.37	49.09	50.58	16.42	29.1	36.74	22.95	25.34	55.37	42.22	32.84	58.89	14.93	26.95	43.46	31.36	23.95	46.41
ENSG00000082153|BZW1	304.03	248.87	286.71	309.47	223.44	241.95	253.89	356.21	239.43	310.95	269.74	220.59	304.25	283.28	203.33	246.38	148.46	240.68	296.63	285.01	236.43	230.95	248.47	199.56	214.92	207.08	198.39	249.31	256.38	194.89	237.35	212.89	195.66	217.42	211.36	219.86
ENSG00000082175|PGR	0	0.01	0.02	0	0.05	0.02	0.11	0	0	0	0	0	0	0	0	0	0	0	0	0	0	0	0	0	0	0	0	0	0	0	0	0	0	0	0.15	0
ENSG00000082196|C1QTNF3	9.74	9.42	14.63	12.79	29.73	27.42	36.29	19.24	18.02	13.88	11.35	7.88	13.79	10.64	11.58	9.87	12.08	8.87	8.92	15.33	16.19	19.87	18.82	12.5	11.68	13.38	8.46	19.3	18.18	12.39	14.57	15.59	13.94	9.53	11.97	8.85
ENSG00000082212|ME2	71.49	57.48	62.5	61.36	55.89	63.02	50.7	53.08	50.64	61.4	55.41	62.8	59.07	51.37	65.04	72.59	58.43	67.09	62.8	56.36	69.6	82.03	79.13	67.13	72.03	75.37	62.75	71.61	78.05	67.35	75.08	84.91	76.55	68.84	72.87	68.26
ENSG00000082213|C5orf22	32.75	27.45	30.36	27.07	41.07	36.16	28.26	33.45	23.44	15.94	22.1	25.25	22.42	26.72	26.13	25.17	13.72	29.2	23.51	23.65	22.81	20.71	25.34	28.97	31.83	35.22	25.51	22.76	27.5	40.05	19.59	27.51	22.22	22.66	28.59	28.6
ENSG00000082258|CCNT2	91.91	78.78	121.44	77.14	155.28	130.59	125.58	125.86	104.14	73.23	104.44	122.11	86.26	103.82	120.62	95.07	41.53	146.67	91.14	104.08	123.67	93.8	99.68	124.97	106.58	91.31	124.82	89.68	104.58	123.09	91.63	97.62	129	100.92	90.91	132.19
ENSG00000082269|FAM135A	23.24	22.11	28.84	23.59	38.03	29.14	22.31	23.47	20.99	24.35	26.47	21.8	25.63	21.73	27.2	28.88	24.39	37.13	26.59	23.45	28.6	27.52	25.91	28.65	34.93	44.01	36.8	23.63	33.8	24.62	20.47	25.96	22.63	27.32	27.05	31.45
ENSG00000082293|COL19A1	0.11	0.06	0.72	0.11	0.46	0.53	1.21	2.28	0.36	0	0.12	0.05	0	0.08	0	0.15	0	0.72	0.34	0.49	0	0.08	0.13	0.22	0.08	0	0.04	0.19	0.19	3.65	0.13	0.04	5.33	0	0.28	0.6
ENSG00000082397|EPB41L3	65.03	58.22	269.09	58.61	82.76	161.87	114.05	210.01	138.07	114.15	344.21	517.69	137.56	378.43	427.95	141.67	86.34	213.53	110.18	276.68	456.51	153.04	142.11	210.05	128.21	120.56	148.82	51.37	94.91	107.67	50.09	71.43	94.66	94.67	69.06	91.86
ENSG00000082438|COBLL1	2.9	1.54	1.28	10.02	2.77	5.62	12.05	4.38	1.87	7.01	0.77	0.04	4.47	0.94	0.15	5.63	1.56	0.23	3.43	1.34	0.15	4.72	5.29	0.13	9.15	8.18	0.16	4.62	4.32	3.15	5.14	4.04	0.04	7.76	7.38	0.68
ENSG00000082458|DLG3	39.49	37.56	51.21	43.05	55.44	59.15	61.94	60.7	60.46	41.71	61.81	70.57	48.29	55.54	76.65	53.37	35.46	73.76	50.3	59.08	70.73	48.54	52.71	67.97	52.24	33.79	66.8	38.1	41.32	66.5	33.9	32.45	67.71	36.27	33.66	63.86
ENSG00000082482|KCNK2	6.9	6.82	6.83	10.86	5.64	8.25	6.16	4.87	8.51	5.15	7.34	4.17	3.26	8	6.24	6.08	3.78	58.65	3.41	6.41	5.82	4.33	9.01	61.21	6.78	5.83	55.71	6.15	10.81	59.23	6.11	5.93	69.05	6.98	3.91	59.87
ENSG00000082497|SERTAD4	10.86	9.99	13.12	6.94	14.07	14.95	9.74	6.25	20.44	11.33	4.2	1.08	10.2	6.37	1.13	6.26	2.45	0.36	8.88	3.7	0.84	9.83	7.15	0.78	3.66	4.73	0.76	0.94	1.13	0.39	1.22	1.42	0.34	1.93	1.98	1.03
ENSG00000082512|TRAF5	16.76	18.4	1.33	12.05	2.46	3.13	1.45	4.12	2.54	15.83	7.1	2.76	15.47	11.11	3.56	27.24	15.66	4.39	14.04	7.19	2.06	31.96	27.66	7.27	21.61	28.86	5.3	15.27	15.42	6.34	17.3	22.55	6.2	17.85	20.51	5.02
ENSG00000082515|MRPL22	35.43	32.54	36.33	36.81	30.59	34.5	46.73	30.81	23.22	39.79	30.24	26.71	40.59	29.89	34.77	39.83	48.51	33.57	43.96	36.32	26.2	41.39	35.57	38.5	29.67	36.59	31.82	44.61	47.4	64.04	50.3	55.95	48.56	26.32	43.81	26.1
ENSG00000082516|GEMIN5	17.48	14.67	18.57	19.16	12.98	18.31	11.9	15.58	18.04	16.5	13.42	11.34	15.17	13.66	15.15	16.51	9.95	13.66	16	15.84	13.52	13.29	12.28	13.22	14.96	13.29	10.21	15.46	14.84	17.3	17.23	15.79	18.35	15.35	11.73	12.19
ENSG00000082556|OPRK1	1.39	3.02	0.71	2.71	0.78	0.84	1.23	2.62	0.86	0.25	0.32	0.06	0.05	0.32	0	0.05	0.15	0	0.2	0.11	0.25	0.05	0.09	0.06	0.06	0	0	0.27	0.1	0.14	0	0	0.06	0.11	0	0.05
ENSG00000082641|NFE2L1	83.94	93.47	90.99	93.25	74.47	81.01	110.76	106.93	74.71	75.09	62.73	67.23	69.14	67.08	68.9	111.69	76.22	84.62	83.79	76.5	88.34	78.35	76.77	59.57	157.86	161.93	77.82	67.1	84.59	64.42	68.55	62.71	54.98	142.74	199.49	71.13
ENSG00000082684|SEMA5B	69.63	69.42	31.29	66.88	32.38	41.48	35.3	30.39	70.95	81.59	41.99	29.32	86.94	48.37	22.82	86.96	83.98	9.17	73.6	52.26	25.41	118.01	103.61	24.14	66.25	71.18	13.36	78.01	99.88	26.52	80.67	87.78	29.57	54.13	56.79	19.77
ENSG00000082701|GSK3B	56.56	56.54	97.68	57.39	99.49	95.18	96.06	80.51	80.73	52.33	81.6	80.27	63.54	79.23	74.46	75.17	27.13	80.87	63.39	89.69	96.51	59.15	64.56	73.53	67.16	60.25	79.98	62.63	70.59	75.43	73.94	65.05	81.98	66.55	53.42	83.98
ENSG00000082781|ITGB5	3.17	3.56	2	7.85	0.52	0.06	3.94	3.1	0.83	3.51	8.06	0	3.83	2.32	0.05	12.8	25.47	0.48	2.13	1.98	0.05	23.59	32.83	1.21	15.68	33.31	0.57	21.43	17.72	1.99	7.51	13.08	0.56	8.96	24.99	1.65
ENSG00000082805|ERC1	23.7	26.67	82.09	26.35	53.14	71.22	57.49	62.97	39.3	21.71	57.97	74.03	24.47	53.7	70.22	32.28	8.29	75.83	27.15	60.89	71.98	22.6	34.77	54.9	29.62	25.56	58.85	22.93	34.43	73.56	33.63	29.39	93.86	44.8	28.11	65.3
ENSG00000082898|XPO1	265.3	267.7	168.22	287.23	205.35	221.94	156.97	127.71	231.22	221.13	160.72	176.05	207.97	172.39	184.03	280.5	135.76	197.26	221.85	250.47	187.81	268.15	274.84	192.09	321.35	281.09	226.76	210.14	190.33	130.7	318.7	312.39	222.69	248.47	219.73	181.58
ENSG00000082996|RNF13	35.96	40.66	38.48	40.66	57.69	43.73	43.94	51.04	41.8	50.57	30.66	34.53	49.54	31.11	35.77	66.77	35.98	28.45	39.27	39.41	33.78	44.05	52.86	27.58	68.04	60.88	31.77	66.71	65.13	35.68	59.29	58.93	29.09	45.12	55.62	23.68
ENSG00000083067|TRPM3	22.19	14.09	4.56	114.36	6.99	6.57	34.36	25.67	8.25	0.46	0.87	1.26	0.94	0.18	1.75	2.45	0.47	2.96	8.39	2.15	0.9	2.05	1.68	2.42	4.08	0.98	3.27	9.48	1.41	0.98	0.84	0.5	0.15	18.05	1.68	0.55
ENSG00000083093|PALB2	21.36	13.75	13.68	18.65	16.49	9.6	14.53	12.44	18.82	19.76	11.65	6.67	13.54	14.39	10.97	13.92	8.88	15.55	16.01	14.49	11.67	14.93	12.91	13.2	14.23	11.78	13.92	19.68	20.17	21.75	12.27	13.17	18.88	20.12	10.39	21.15
ENSG00000083097|DOP1A	35.6	31.4	71.17	27.06	82.41	74.98	63.69	54.83	55.91	28.15	47.78	56.42	37	40.06	56.44	50.78	17.47	70.41	36.6	45.86	53.09	42.48	49.51	60.69	59.08	36.3	60.85	37.15	57.75	74.4	46.33	52.78	79.74	62.74	52.14	70.32
ENSG00000083099|LYRM2	73.25	63.02	60.81	67.13	60.08	57.24	67.17	67.47	61.42	56.83	51.45	58.32	55.7	55.65	51.25	67.36	42.81	57.46	75.17	61.81	58.93	65.3	65.47	58.43	63.47	67.97	54.19	72.3	59.27	53.47	56.4	57.59	49.37	54.74	62.85	58.8
ENSG00000083123|BCKDHB	17.99	17.05	7.2	17.2	14.11	12.93	10.34	40.31	9.16	12.15	11.32	7.6	12.83	11.76	8.53	11.75	8.58	9.96	12.89	11.14	8.54	17.1	11.44	6.68	12.99	16.15	8.53	10.8	8.11	6.01	9.29	10.15	7.06	10.79	11.11	6.11
ENSG00000083168|KAT6A	57.12	67.61	55.19	60.19	51.36	49.94	62.74	54	59.95	53.09	53.95	48.94	58.45	51.69	43.36	79.14	21.12	73.72	62.83	53.91	48.01	61.04	61.16	57.76	63.78	54.35	61.42	55.96	57.84	67.1	66.53	63.84	66	64.03	53.15	69.44
ENSG00000083223|TUT7	19.17	19.93	19.41	15.44	21.01	17.17	17.29	20.12	19.55	16.4	18.58	19.66	16.44	18.53	17.88	21.14	13.88	23.97	19.27	16.92	20.02	15.77	19.35	22.12	19.92	19.26	16.53	18.94	19.3	20.9	20.08	20.96	25.97	23.49	20.29	17.46
ENSG00000083290|ULK2	29.75	29.12	56.79	37.99	61.57	56.74	57.29	42.53	38.93	33.92	40.64	44.59	37.56	40.47	52.65	36.94	23.8	50.89	32.98	39.06	49.72	37.59	40.6	57.29	35.34	28.12	44.17	41.73	39.8	52.55	43.6	45.67	66.67	37.09	35	47.37
ENSG00000083307|GRHL2	0.64	1.4	0.45	0.17	0.12	0.11	0.05	0.11	0.33	0.34	0.14	0.05	0.28	0.05	0.09	0.18	0.33	0	0.49	0.15	0	0.23	0.28	0.16	0.05	0.4	0.13	0.33	0.19	0	0.04	0.09	0.11	0	0	0.29
ENSG00000083312|TNPO1	109.43	94.13	88.27	128.76	127.07	112.71	102.06	130.37	118.47	87.89	93.51	135.69	93.84	99.53	159.56	107.98	38.63	152.28	119.37	123.81	138.37	84.57	88.13	108.2	86.13	78.76	118.96	88.18	101.73	104	102.27	84.47	107.77	91.68	88.11	99.44
ENSG00000083444|PLOD1	38.12	47.04	14.53	53.02	11.6	13.19	11.68	18.54	14.84	32.47	23.48	22.06	37.31	25.74	20.88	37.72	17.32	10.74	46.38	30.17	15.99	33.04	31.54	30.42	24.91	27.36	13.55	36.94	24.29	26.76	46.86	22.63	26.49	27.23	22.8	13.59
ENSG00000083454|P2RX5	0.46	0.52	3.3	0.2	3.44	4.43	2.24	2.57	3.89	0	0.55	3.62	0.43	2.19	2.98	0.42	0.53	1.54	0.18	3	1.23	0.55	0.38	2.25	0	0.26	2.48	0.74	0.34	2.63	0.73	0.45	1.3	0	0	2.11
ENSG00000083457|ITGAE	69.92	55.7	52.25	57.87	69.39	49.37	57.93	61.01	51.66	51.71	56	42.75	56.92	57.97	52.44	45.42	83.92	42.72	63.28	57.78	57.18	45.13	58.37	44.25	34.02	61.15	69.42	41.9	67.79	45.59	43.43	56	38.88	41.26	42.16	53.9
ENSG00000083520|DIS3	40.28	39.12	49.16	33.84	50.44	50.06	45.95	49.57	36.99	29.37	32.13	37.54	34.67	36.39	34.58	48.46	23.49	50.87	35.19	36.01	39.29	38.79	37.5	42.23	48.62	43.33	50.58	42.11	44.57	49.22	44.5	39.62	39.49	47.82	46.09	47.15
ENSG00000083535|PIBF1	24.63	34.66	29.61	25.81	26.15	25.19	25.2	28.26	23.69	29.69	18.39	17.09	20.07	20.74	19.41	37.93	15.98	24.35	34.3	21.36	18.79	25.05	24.11	24.58	40.6	29.83	34.8	24.03	32.82	26.79	25.65	33.94	27.34	26.78	19.55	28.7
ENSG00000083544|TDRD3	36.46	38.24	34.66	41.84	35.61	36.59	37.12	43.54	32.3	34.44	37.37	49.91	31.39	34.69	52.28	44.36	33.14	34.81	32.35	42.88	46.89	42.88	38.41	25.98	46.54	39.6	33.36	35.46	35.06	20.39	44.29	39.01	20.68	47.65	40.91	24.39
ENSG00000083622|AC000061.1	0	0	0	0	0	0	0	0	0	0	0	0	0	0	0	0	0	0	0	0	0	0	0	0	0	0	0	0	0	0	0	0	0	0	0	0
ENSG00000083635|NUFIP1	13.19	14.3	15.59	11.46	10.54	17.41	12.09	13.53	11.19	9.72	14.86	13.86	10.87	12.28	13.51	15.4	13.58	17.52	11.64	12.92	15.77	12.36	14.52	15.96	16.38	14.74	16.93	15.04	16.7	20.38	12.96	10.87	12.46	16.53	15.85	17.38
ENSG00000083642|PDS5B	72.43	61.81	110.11	67.53	95.03	80.2	73.12	77.25	83.63	53.55	73.13	69.51	54.04	78.97	72.41	66.27	29.79	58.34	52.99	72	73.48	62.03	58.62	49.14	51.39	52.34	46.59	57.64	66.22	39.1	73.17	70.4	50.56	38.79	51.61	45.14
ENSG00000083720|OXCT1	34.65	30.75	67.98	36.69	49.99	47.55	45.31	39.07	35.16	39.46	42.91	51.71	46.47	45.15	52.61	41.02	26.31	39.29	41.29	41.2	65.16	40.06	40.93	31.17	36.98	44.6	46.7	33.88	39.77	28.7	33.97	34.25	31.73	31.04	35.6	37.77
ENSG00000083750|RRAGB	23.3	24.02	69.67	44.07	80.53	89.09	80.82	64.45	57.91	31.31	43.58	63.54	30.06	74.93	54.04	45.37	70.44	66.85	40.09	47.94	71.74	37.5	36.47	70.3	55.37	79.69	66.05	43.1	43.83	79.03	50.63	42.49	57.83	54.05	57.02	82.99
ENSG00000083782|EPYC	0	0	0	0	0.25	0	0	0	0	0	0	0	0	0	0	0	0	0	0	0	0	0	0	0	0	0	0	0	0	0	0	0	0	0	0	0
ENSG00000083799|CYLD	13.77	10.92	36.51	12.31	38.45	38.24	30.21	26.99	27.99	10.71	19.83	18.71	16.93	18.44	22.46	24.11	8.29	35.35	12.4	17.79	24.07	15.52	20.03	27.98	24.98	18.07	28.72	21.72	23.45	37.78	20.03	17.32	41.31	28.66	20.15	31.98
ENSG00000083807|SLC27A5	19.76	16	13.02	25.82	18.49	12.46	16.82	9.74	33.53	18.35	10.25	10.05	14.75	16.4	10.96	4.08	19.04	7.93	15.31	10.33	15.58	8.9	9.55	15.08	13.08	10.48	13.83	9.41	11.54	10.07	7.78	11.15	19.1	9.24	10.13	13.37
ENSG00000083812|ZNF324	11.82	11.81	24.35	11.77	22.97	22.25	20.04	14.83	17.46	9.56	16.2	18.46	9.34	16.5	18.79	12.97	7.38	22.77	14.08	11.9	18.5	11.54	9.76	18.01	15.59	11.14	18.74	12.73	14.23	20.75	13.71	14.94	22.52	16.78	13.04	21
ENSG00000083814|ZNF671	23.68	13.61	34.39	18.17	32.58	28.28	41.6	33.67	33.42	21.72	28.01	31.73	27.45	29.36	41.09	30.53	24.15	46.25	25.47	24.61	32.47	31.74	26.67	45.03	29.63	27.48	38.28	38.99	37.19	41.84	35.48	31.9	48.44	32	32.43	51.02
ENSG00000083817|ZNF416	9.94	6.83	9.26	7.91	15.6	13.29	11.63	11.05	7.05	9.39	11.71	13.01	11.34	15.75	14.12	9.64	8.74	19.64	9.39	10.08	14.21	11.01	11.16	15.53	13.31	9.29	14.02	11.22	11.41	20.05	9.64	9.26	13.76	12.18	11.24	18.62
ENSG00000083828|ZNF586	19.32	24.12	26.34	21.1	26.79	23.67	22.1	22.71	21.61	22.54	23.77	23.85	21.26	24.14	22.72	27.73	18.74	30.44	22.54	18.18	27.57	21.26	24.68	31.81	23.12	17.22	22.86	31.5	27.1	42.44	30.86	26.49	41.71	32.75	25.14	33.93
ENSG00000083838|ZNF446	11.5	11.64	16.16	15.58	22.77	23.49	21.34	14.4	17.74	16.26	15.42	19.36	16.69	14.05	22.25	19.8	19.85	26.09	14.33	14.64	17.77	13.32	13.88	20.61	20.79	21.31	17.96	14.63	18.71	19.56	16.71	16.1	23.82	20.13	18.08	21.51
ENSG00000083844|ZNF264	12.91	17.55	17.14	11.79	15.75	17.78	20.87	12.7	14.44	13.99	12.86	12.88	12.24	12.28	12.65	18.51	4.48	21.33	12.76	13.38	13.95	10.82	14.87	16.12	17.68	15.06	15	16.74	20.77	25.25	14.99	15.12	18.85	15.58	17.97	24.9
ENSG00000083845|RPS5	1090.4	1129.74	689.65	1045.53	566.06	646.51	687.21	853.23	805.39	1009.09	916.42	910.76	872.74	873.64	940.53	698.45	1136.68	724.62	995.87	796.92	847.45	670.21	654.16	643.85	766.08	798.89	825.28	850.7	784.19	665.47	688	706.56	617.21	882.78	917.48	801.64
ENSG00000083857|FAT1	82.33	68.38	45.44	109.12	105.58	66.36	92.31	60.35	59.66	84.65	47.97	22.97	71.12	66.3	19.67	70.9	28.66	7.6	84.89	50.4	36.82	69.62	69.58	12.03	76.13	88.95	7.61	41.08	42.91	8	42.75	46.45	4.33	49.96	59.72	6.96
ENSG00000083896|YTHDC1	175.35	218.46	231.13	167.24	185.51	230.65	200.57	205.98	187.64	137.04	141.28	211.51	151.31	131.66	129.07	349.04	166.49	236.26	173.12	203.68	129.06	176.01	181.1	164.78	224.84	185.99	174.44	281.2	194.8	234.67	217.1	168.71	207.88	259.81	176.14	183.91
ENSG00000083937|CHMP2B	37.18	34.3	40.87	40.4	35.55	44.23	26.52	27.99	31.75	37.24	25.49	28.3	38.57	30.01	35.39	60.6	49.02	46.7	29.67	24.14	26.87	59.88	41.22	44.96	62.87	60.85	51.34	45.24	51.37	67.64	45.23	44.74	56.72	46.3	65.97	53.1
ENSG00000084070|SMAP2	22.34	23.82	83.64	25.25	98.62	72.65	73.01	54.91	55.12	21.88	59.15	74.38	26.36	63.79	71.89	25.27	12.78	62.55	22.54	46.47	73.27	23.68	25.68	63.79	26.16	17.01	61.69	23.24	39.03	61.65	34.63	30.61	58.42	25.47	21.66	50.34
ENSG00000084072|PPIE	68.78	67.21	56.13	58.05	66.81	52.39	57.77	69.01	62.81	63.44	55.92	51.54	61.92	51.66	48.73	57.87	80.15	66.19	69.39	69.19	41.64	66.99	58.66	49.78	70.15	62.12	68.81	64.66	60.49	67.39	62.38	63.06	52.23	59.58	65.26	72.85
ENSG00000084073|ZMPSTE24	48.76	34.66	39.38	40.59	34.53	36.64	41.96	53.08	38.68	45.29	49.93	44.4	49.16	46.85	38.67	49.48	32.75	45.78	50.12	51.1	53.5	40.36	44.89	42	53.23	48.72	50.47	56.69	46.84	49.61	40.25	38.7	38.64	49.77	56.13	51.24
ENSG00000084090|STARD7	110.53	94.81	121.92	119.36	110.89	112.84	114.22	101.76	101.1	115.77	140.11	108.43	125.26	126.63	117.86	117.25	82.74	168.88	117.64	122.35	139.7	111.82	106.53	123.63	93.07	102.25	134.73	126.11	128.33	145	104.98	132.81	148.46	94.31	89.95	137.98
ENSG00000084092|NOA1	10.65	15.32	12.34	14.65	15.32	13.74	15.39	13.36	19.76	10.68	12.44	17.89	11.13	14.14	17.03	13.42	14.14	25.18	10.21	12.85	16.34	14.76	13.47	17.41	16.23	15.41	20.49	13.09	14.06	17.14	14.29	14.07	18.08	16.49	14.25	20.94
ENSG00000084093|REST	23.23	23.38	6.59	24.88	5.32	7.81	9.78	11.34	14.34	18.74	10.38	10.15	18.69	13.95	11.6	24.15	6.96	8.57	21.31	17.33	10.14	17.89	16.46	9.48	19.46	20.82	9.57	19.05	15.7	7.65	12.05	14.38	6.17	14.4	15.62	4.57
ENSG00000084110|HAL	0.18	0.51	0	0.11	0	0.11	0.13	0	0.12	0.12	0.13	0.15	0.97	0.28	0	0.12	0	0	0.11	0	0	0.1	0.11	0.56	0.07	0.06	0.06	0.1	0.06	3.6	0	0	0.38	0	0	0
ENSG00000084112|SSH1	14.53	13.3	16.92	14.91	17.04	16.22	20.43	13.87	16.05	13.15	13.81	15.2	18.04	18.73	15.9	16.54	4.75	20.64	15.57	21.86	14.93	19.77	19.83	21.2	13.58	12.18	15.82	18.91	17.78	18.62	16.07	20.76	17.3	15.19	15.84	16.79
ENSG00000084207|GSTP1	629.2	546.01	298.23	708.69	208.64	267.58	293.56	467.86	415.41	736.89	541.7	439.74	662.54	606.77	428.49	429.18	716.22	267.76	679.82	568.07	420.76	629.75	600.86	416.57	429.05	556.17	308.55	668.34	609.37	457.52	526.06	574.29	350.58	454.92	559.21	281.12
ENSG00000084234|APLP2	211.35	233.82	261.01	233.37	324.11	273.96	355.45	278.71	296.06	205.07	220.32	203.97	221.27	241.83	220.44	245.5	139.82	233.24	182.63	195.09	187.55	251.37	287.09	256.88	280.02	268.72	231.29	248.04	269.3	315.29	225.04	226.74	330.68	274.88	253.64	282.2
ENSG00000084444|FAM234B	14.62	16.13	35.72	16.39	40.12	34.52	28.91	25.04	25.97	10.15	22.02	34	12.44	20.94	33.67	10.76	8.2	27.14	13.63	21.28	32.82	14.53	13.43	27.77	11.71	12.27	24.24	9.95	12.83	25.66	14.7	12.52	19.59	9.45	9.17	18.96
ENSG00000084453|SLCO1A2	14.13	5.11	4.34	7.69	6.25	8.51	4.69	7.15	8.11	3.83	3.07	3.03	5.14	2.75	2.89	6.03	0.85	3.86	7.18	5.39	8.5	3.37	3.29	1.61	5.18	12.03	3.37	3.25	3.59	3.79	4.14	4.26	2.67	1.31	3.99	3.46
ENSG00000084463|WBP11	58.29	55.49	62.39	55.24	60.94	56.61	58.6	51.72	49.75	46.64	47.66	44.78	49.68	44.59	37.41	48.47	32.18	56.92	50.05	65.4	52.92	47.77	44	54.96	60.31	41.15	55.05	67.42	49.44	61.42	65.36	44.17	42.86	38.92	37.26	54.31
ENSG00000084623|EIF3I	183.21	170.73	188.11	188.87	152.51	156.9	153.08	152.09	178.31	155.82	195.36	166.74	163.44	157.37	161.59	138.15	220.5	139.96	175.69	177.89	204.29	146.38	144.36	165.5	135.44	162.97	175.2	140.48	153.28	140.63	156.67	156.57	153.35	181.34	165.67	168.02
ENSG00000084628|NKAIN1	58.64	54.48	134.89	57.74	130.36	128.37	129.37	90.65	89.91	75.56	176.31	171.88	85	175.49	173.04	84.08	62.66	175.91	76.29	140	164.99	51.88	56.99	132.29	93.75	63.48	159.81	41.15	38.54	114.97	57.36	38.33	127.48	101.99	76.85	156.41
ENSG00000084636|COL16A1	7.83	7.01	19.16	4.22	9.18	15.24	15.38	7.31	16.87	17.38	28.17	18.92	15.53	31.29	19.19	28.08	21.41	23.26	11.48	32.71	27.72	23.59	23.07	18.7	28.71	27.14	22.14	20.2	8.52	25.33	8.43	8.97	11.7	24.06	13.47	21.29
ENSG00000084652|TXLNA	34.21	31.46	24.22	37.85	27.54	29.53	30.06	27.96	32.49	38.09	31.17	28.43	39.16	33.45	23.99	44.31	28.58	32.16	40.88	36.05	26.75	47.02	41.49	33.18	42.98	43.05	29.58	41.16	40.76	37.24	37.11	33.87	34.12	40.87	39.16	32.01
ENSG00000084674|APOB	0.08	0.01	0.09	0	0.02	0.09	0.03	0	0.03	0	0	0	0	0	0	0	0	0	0	0	0	0	0	0	0	0	0	0.02	0	0.15	0	0	0	0	0	0
ENSG00000084676|NCOA1	44.82	36.39	49.17	51.07	50.37	45.05	45.92	38.18	39.36	44.76	44.9	44.98	44.05	45.06	51.51	57.54	30.17	81.78	47.59	46.57	56.84	43.1	51.85	61.46	55.66	50.98	72.23	55.75	50.82	76.01	51.04	46.7	73.77	50.84	49.97	71.43
ENSG00000084693|AGBL5	35.67	39.2	36.71	43.99	46.65	54.45	37.64	31.95	43.61	31.32	29.84	39.13	26.38	39.5	34.89	31.86	17.32	38.63	34.51	40.22	31.57	27.92	25.5	34.65	32.87	33.73	36.68	31.18	40.6	31.52	34.6	33.4	36.88	27.13	23.05	32.6
ENSG00000084710|EFR3B	31.37	23.44	96.86	32.47	53.02	75.08	50.64	47.42	46.19	28.17	72.8	97.42	34.13	74.13	83.74	20.41	9.73	44.38	29.58	77.96	108.39	23.69	25.61	42.81	17.33	16.94	38.62	19	25.73	26.33	23.25	23.74	31.53	14.44	12.12	32.91
ENSG00000084731|KIF3C	54.65	53.71	323.72	46.16	240.42	280.86	250.57	203.59	187.1	82.5	217.91	278.82	85.65	194.33	272.45	104.73	48.92	240.53	75.74	205.28	277.46	88.93	113.43	233.18	86.07	55.9	218.02	76.97	128.56	174.05	128.75	97.72	186.63	95.73	72.65	194.01
ENSG00000084733|RAB10	86.43	79.75	130.45	86.42	127.41	117.46	112.37	115.44	100.37	99.13	141.29	134.24	111.38	134.51	135.61	107.7	97.45	129.23	103.81	119.28	143.95	111.98	128.72	142.89	115.98	120.46	140.71	106.28	114.48	123.75	104.79	128.3	151.84	102.36	98.87	133.27
ENSG00000084734|GCKR	1.84	0	0.51	0.66	3.05	0.14	0.61	0	2.06	0.91	1.03	1.1	0	0	2.68	2.75	1.28	1.69	1	0	1.93	1.25	1.64	1.52	1.7	1.82	2.72	0	0.12	0.34	0.62	0.5	2.75	1.02	0.37	0.6
ENSG00000084754|HADHA	123.45	145.62	69.24	145.4	77.44	78.99	100.48	121.04	111.18	132.51	94.71	71.48	124.6	96.87	72.9	143.12	150.62	86.88	132.52	102.49	77.02	142.55	134.46	95.87	142.19	152.51	84.06	141.48	145.63	93.59	156.32	144.55	113.43	142.5	153.43	92.95
ENSG00000084764|MAPRE3	41.81	43.72	214.87	44.85	240.64	211.33	224.26	126.1	155.55	33.8	108.56	152.86	51.51	104.75	156.77	48.61	37.08	125.68	47.83	110.85	161.81	39.74	54.72	116.2	46.28	52.44	125.89	42.43	60.53	124.29	52.92	62.47	114.15	56.02	50.11	110.07
ENSG00000084774|CAD	40.51	32.85	18.37	52.38	19.49	14.07	16.39	12.47	20.72	30.47	22.3	19.1	23.93	19.57	13.1	27.09	28.04	26.05	34.89	20.93	20.62	22.88	22.73	18.69	33.37	27.02	26.3	24.82	17.31	15.86	19.89	21.69	26.85	28.17	22.49	26.13
ENSG00000085063|CD59	86.41	85.23	135.53	106.66	172.06	128.31	136.54	132.48	140.08	79.78	99.81	81.66	74.96	99.57	79.07	54.93	75.96	81.08	86.21	98.94	97.23	79.98	103.72	110.71	60.17	69.46	88.67	84.29	101.71	100.64	79.68	95.37	108.44	62.21	75.28	74.57
ENSG00000085117|CD82	14.12	10.87	3	12.13	2.41	3.06	5.41	10.5	4.82	16.77	13.95	3.84	20.95	9.89	9.09	9.67	7.48	5.19	8.91	8.62	4.26	14.35	13.43	6.01	5.2	10.4	2.97	10.38	15.63	2.4	6.69	15.42	4.15	7.12	3.4	1.39
ENSG00000085185|BCORL1	10.18	17.44	15.04	14.83	17.98	13.53	15.5	10.31	14.67	13.4	14.74	17.64	16.33	16.59	14.41	14.17	5.44	21.5	16.51	14.49	18.13	12.78	16.18	16.46	11.1	11.32	15.08	9.6	11.1	16.77	12.62	11.05	19.24	9.18	9.23	14.17
ENSG00000085224|ATRX	95.65	87.8	145.99	96.77	130.92	150.74	115.39	146.92	104.19	77.19	106.13	122.11	91.27	92.81	113.33	118.7	67.66	152.13	86.53	117.35	123.11	110.75	122.28	113.24	121.45	107.44	124.24	98.43	108.03	123.54	125.47	123.85	145.02	114.12	98.32	129.44
ENSG00000085231|AK6	53.32	48.7	50.75	51.46	58.28	44.87	56.7	74.54	50.51	85.09	75.58	56.13	60.14	87.95	51.59	99.14	127.76	61.54	71.76	83.49	82.67	48.43	67.42	57.62	106.35	113.5	66.94	61.43	73.37	65.64	73.24	58.95	56.86	81.59	106.46	58.18
ENSG00000085265|FCN1	0	0.05	0.06	0	0.08	0	0	0.06	0	0	0.06	0	0	0.06	0	0.05	0.04	0	0.05	0.06	0.05	0	0	0.03	0.19	0	0.05	0	0.11	0	0.1	0.11	0	0.06	0.17	0.05
ENSG00000085274|MYNN	26.66	21.48	23.25	17.86	24.64	23.17	17.69	20.64	16.96	15.29	19.66	24.25	22.03	20.52	23.78	32.03	20.29	38.42	17.65	23.06	25.94	25.34	19.53	27.38	26.49	31.06	29.55	29.87	31.74	32.93	26.62	21.38	30.05	27.86	24.55	35.67
ENSG00000085276|MECOM	2.18	1.85	1.45	0.73	0.13	0.49	0.25	2.34	1.31	0.2	0.17	0.1	0	0	0	0	0	0	0	0.05	0.1	0	0	0	0	0.07	0	0.33	0.05	0.43	0	0.05	0	0.05	0	0
ENSG00000085365|SCAMP1	42.88	42.73	139.94	63.58	129.65	122.64	92.15	91.29	76.24	38.95	70.92	108.66	44.44	72.06	108.97	44.68	29.76	105.4	44.45	69.95	104.44	41.54	42.83	80.06	42.2	39.33	90.81	36.25	48.87	66.32	43.21	43.19	66.41	36.87	37.09	73.92
ENSG00000085377|PREP	22.63	21.65	43.86	17.26	45.28	41.99	46.69	36.12	28.26	16.77	35.02	44.62	16.16	28.42	37.72	13.89	12.22	32.02	17.47	36.18	46.97	15.58	16.4	33.59	18.13	13.06	33.78	17.79	19.35	38.24	21.59	17.46	34.68	18.31	15.7	32.86
ENSG00000085382|HACE1	35.77	38.31	34.56	27.7	50.58	46.76	36.28	29.89	44.26	29.84	31.38	36.71	34.05	32.71	37.24	34.94	22.61	36.29	29.18	31.55	37.84	36.38	39.54	41.07	34.79	36.33	36.94	35.89	33.81	31.51	41.28	39.76	40.59	30.88	31.3	31.64
ENSG00000085415|SEH1L	37.51	34.05	39.21	42.97	27.82	34.39	40.09	39.7	35.79	38.41	46.34	46.13	38.01	47.3	48.09	39.16	21.12	45.77	35.07	48.3	49.71	31.01	31.84	54.02	31.66	27.25	47.31	37.36	39.87	51.23	29.45	33.48	45.48	41.67	33.04	55.07
ENSG00000085433|WDR47	43.19	36.84	128.08	35.34	90.7	117.64	108.7	126.84	93.35	64.54	160.33	159.94	93.77	142.16	169.58	127.05	66.96	194.29	76.96	128.74	171.74	107.73	122.13	196.09	115.51	93.48	178.86	119.23	142.31	197.71	119.63	114.85	203.72	112.5	94.13	171.11
ENSG00000085449|WDFY1	56.41	48	65.94	53.5	52.9	53.24	70.08	67.88	56.43	47.41	47.05	47.56	49.13	44.31	53.37	62.04	34.6	40.7	54.44	50.13	48.75	49.34	42.93	37.75	48.98	52.75	45.11	33.86	38.24	36.37	37.84	44.19	38.75	49.32	47.04	43.04
ENSG00000085465|OVGP1	2.85	4.31	12.27	2.5	12.42	12.98	9.61	7.9	8.59	1.84	2.93	9	3.87	5.5	8.13	3.85	3.25	7.92	2.82	3.54	3.15	1.99	4.01	8.98	1.81	1.18	11.79	2.76	3.78	12.52	1.61	5.51	6.5	3.05	2.7	16.25
ENSG00000085491|SLC25A24	28.45	26.66	19.06	26	19.56	22.19	22.43	23.2	23.56	25.84	22.3	18.08	28.92	24.75	18.31	28.58	21.99	27.2	29.43	26.92	18.1	29.16	29.57	26.83	30.3	26.92	27.42	28.89	24.3	26.79	29.5	27.63	25.23	28.06	25.56	23.89
ENSG00000085511|MAP3K4	60.42	38.41	31.89	46.55	30.79	30.62	27.16	29.45	111.98	48.31	34.84	34.84	35.78	26.38	27.66	30.78	32.71	25.67	49.21	26.91	33.21	30.42	36.37	25.92	22.31	35.35	24.93	35.79	52.48	46.04	36.24	37.92	69.32	28.24	22.82	37.86
ENSG00000085514|PILRA	5.19	5.97	5.08	3.17	12.52	8.68	8.38	5.02	5.59	13.49	5.43	6.93	4.33	3.55	8.53	5.32	3.66	12.54	3.43	8.08	5.2	4.41	5.86	6.66	5.86	6.76	5.94	3.46	5.51	12.73	6.41	7.4	9.94	10.35	5.77	14.18
ENSG00000085552|IGSF9	39.19	37.6	26.5	44.04	26.77	27.96	43.57	34.64	37.21	43.37	29.01	16.16	42.95	30.84	14.74	32.22	34.28	20.55	47.09	38.26	17.5	43.58	39.16	28.65	26.41	26.46	17.81	19.93	11.96	32.39	19.57	11.45	28.98	19.2	14.45	16.62
ENSG00000085563|ABCB1	4.58	0.35	0.8	4.2	3.43	0.41	1.05	1.26	0.67	1.72	0	0.24	0.45	0	0.84	1.44	1.61	0.07	1.77	1.21	1.09	2.66	0.79	0.33	0.38	0.78	0.36	1.04	0.46	0.14	0.79	1.04	0	1.26	0.28	0.05
ENSG00000085644|ZNF213	12.9	14.64	25.88	16	26	26.99	22.88	16.03	21.02	11.8	17.15	18.93	13.38	20.95	21.08	17.3	5.64	28.14	15.32	20.05	19.8	16.55	16.38	21.23	23.61	17.23	24.49	14.88	18.17	24.25	13.88	15.88	22.78	22.52	20.13	30.36
ENSG00000085662|AKR1B1	120.48	104.04	116.42	119.27	117.37	125.63	128.35	108.29	116.19	97.04	102.09	88.22	103.37	111.81	68.1	67.28	104.2	96.45	102.23	117.31	101.57	103.43	103.65	113.32	60.57	73.64	105.05	81.42	86.12	116.83	95.85	85.86	137.05	80.31	65.46	110.79
ENSG00000085719|CPNE3	86.44	82.33	52.03	72.06	47.49	44.13	64.45	86.24	60.55	110.79	104.37	67.89	138.54	109.72	82.13	105.21	31.91	66.93	102.35	95.42	85.18	96.14	104.5	77.71	73.82	81.95	56.98	75.68	77.34	64.98	83.7	80.11	83.39	61.28	68.22	67.44
ENSG00000085721|RRN3	55.68	51.29	94.93	56.83	93.06	90.28	81.03	86.08	62.94	60.88	77.31	82.34	59.99	68	79.39	76.36	62.74	93.31	61.76	74.97	89.3	53.5	62.86	84.92	78.88	68.67	93.47	65.02	78.35	98.43	70.28	57.42	89.06	77.86	72.48	107.15
ENSG00000085733|CTTN	88.43	80.47	130.99	91.2	165.61	131.74	140.64	94.54	124.43	93.37	109.62	119.85	105.19	106.31	130.92	148.73	96.86	165.2	106.84	109.8	117.34	138.53	143.41	144.68	166.28	159.41	147.5	124.81	125.72	138.68	145.71	154.47	168.85	180.89	155.47	159.54
ENSG00000085741|WNT11	0	0.82	0	1.45	0.19	0	0.14	0.16	0	0	0	0	0	0	0	0.27	0.2	0	0	0	0	0.62	0.12	0.16	1.09	0.14	0	0.29	0	1.45	0.48	0.15	0.33	0.76	0.29	0
ENSG00000085760|MTIF2	27.27	30.63	30.22	26.51	32.21	34.83	29.6	33.56	23.87	27.41	32.42	25.85	28.41	27.28	24.9	30.96	26.93	30.02	29.41	28.16	27.91	30.88	34.13	31.17	33.39	31.23	29.69	45.85	30.94	31.61	35.83	28.09	29.48	35.4	32.79	36.22
ENSG00000085788|DDHD2	79.26	86.55	82.25	69.29	175.33	83.3	115.87	85.77	93.29	74.99	79.31	79.76	82.35	70.12	93.54	104.95	74.13	125.99	72.7	88	86.17	78.59	92.22	120.9	115.72	78.82	94.22	117.24	102.39	121.8	102.59	89.63	118.71	108.75	63.39	114.68
ENSG00000085831|TTC39A	0.35	1.3	0.49	0.44	1.54	0.26	0.49	2.47	1	0.14	0.16	0.05	0.08	0.04	0.18	0.54	0.25	1.27	0.45	0.89	0.87	0.45	0.64	1.48	0.33	0.38	0.47	0.23	0.42	0.62	0.73	0.32	1.07	0.49	0.52	0.54
ENSG00000085832|EPS15	36.25	39.68	108.58	42.14	129.8	119.7	84.52	95.27	91.59	28.83	39.92	60.42	30.23	39.07	62.56	137.66	54.08	140.61	25.91	42.23	66.59	46.73	56.86	67.16	130.61	131.26	124.79	39.24	43.31	51.21	39.73	54.51	58.88	115.26	113.22	121.95
ENSG00000085840|ORC1	21.74	19.1	1.16	22.05	1.71	1.75	1.42	4.62	8.94	15.4	3.39	0.68	13.79	5.46	0.46	5.51	6.78	1.27	17.93	6.38	1.33	12.58	11.46	0.56	4.02	5.98	0.61	12.76	9.82	0.89	13.4	12.32	1.31	2.2	6.21	1.04
ENSG00000085871|MGST2	1.39	3.27	0.75	4.69	2.49	2.95	1.57	2.19	0.81	1.92	0.16	0.19	4.73	2.01	0.44	0.15	0.69	3.1	3.5	1.03	0.3	2.85	3.84	1.05	2.9	1.05	0	3.38	2.17	2.88	0.13	2.13	0.57	0.53	1.51	0
ENSG00000085872|CHERP	55.14	60.45	54.49	52.58	50.45	46.25	54.24	27.71	60.89	55.39	44.05	47.13	54.12	40.01	47.4	60.87	68.88	76.7	55.46	49.79	46.15	63.15	64.87	76.59	67.21	54.44	68.08	48.37	47.82	62.85	72.03	70.19	67.23	58.61	49.97	78.83
ENSG00000085978|ATG16L1	23.81	25.79	53.31	23.55	34.65	35.93	41.53	35.42	32.65	23.17	30.8	36.46	23.08	26.29	37.24	32.98	13.05	41.69	19.74	30.06	38.74	22.96	25.67	37.54	25.53	23.82	49.02	34.99	28.35	43.36	28.77	29.24	43.77	28.69	27.67	42.67
ENSG00000085982|USP40	23.67	16.89	23.41	23.78	30.43	21.65	31.58	126.65	25.71	19.95	11.8	19.61	17.79	18.4	20.87	31.81	22.81	20.07	19.1	20.43	20.93	26.11	23.63	19.14	33.33	32.41	17.52	19.12	20.6	21.09	26.83	21.41	23.84	23.1	29.53	21.43
ENSG00000085998|POMGNT1	36.02	36.71	54.18	43.07	63.37	59.43	50.78	39.82	44.73	47.03	45.26	62.16	41.15	50.78	72.45	52.36	39.5	50.48	52.17	45.28	59.36	63.87	57.48	56.23	51.1	60.07	51.47	51.39	52.6	53.06	50.38	58.23	55.62	44.51	70.33	51.18
ENSG00000085999|RAD54L	25.09	35.73	1.53	23.55	0.43	2.37	5.47	6.3	11.32	27.03	11.59	1.03	25.66	11.19	0	10.86	14.52	0.89	29.34	13.06	4.04	21.48	35.01	1.8	12.19	14.8	2.27	29.2	17.85	0.68	27.86	20.73	1.29	4.96	13.25	2.47
ENSG00000086015|MAST2	25.88	42.86	51.77	22.82	74.15	61.26	61.12	47.35	53.5	31.69	43.11	65.72	33.25	45.25	72.32	41.4	32.46	82.98	29.84	42.68	49.24	40.66	59.11	92.65	44.06	36.76	83.48	45.63	55.83	88.53	63.46	64.13	125.2	55.18	42.3	99.32
ENSG00000086061|DNAJA1	369.17	425.27	538.23	328.73	499.75	514.44	474.63	520.46	533.65	327.29	464.07	449.54	370.77	386.71	402.44	339.64	321.43	412.33	394.14	419.57	487.7	384.53	359.64	459.71	298.92	258.71	399.4	347.09	341.78	381.44	311.66	257.54	338.87	247.61	219.35	328.17
ENSG00000086062|B4GALT1	5.65	7.11	3.31	9.37	4.34	4.91	4.55	4.65	4.29	7.57	5.31	4.03	6.6	5.26	3.77	4.99	2.88	4.88	6.6	5.68	2.98	6.47	5.68	4.58	4.96	6.81	4.15	5.87	5.41	6.49	6.18	5.99	4.98	4.5	5.87	4.71
ENSG00000086065|CHMP5	84.06	81.43	145.81	77.1	154.7	140.03	115.78	146.38	110.34	103.1	112.53	137.39	101.7	111.43	142.44	108.15	116.08	124.83	90.04	110.57	136.99	99.01	99.8	147.47	113.37	118.22	140.32	97.95	122.42	135.1	101.86	113.91	125.9	103	103.96	119.38
ENSG00000086102|NFX1	26.61	28.7	37.03	28.41	42.74	39.71	37.88	35.95	29.6	26.57	28.5	28.48	26.78	25.82	30.22	45.63	25.75	42.73	32.29	27.69	28.49	34.51	31.96	38	44.19	34.61	47.21	36.42	40.31	44.68	34.91	31.51	38.24	43.9	40.89	53.17
ENSG00000086159|AQP6	0.65	0.85	0.05	0.44	0.14	0.54	0.58	0.58	0.35	0.81	0.73	0	0.47	0.62	0.41	0.66	0.34	0.45	0.68	0.75	0.32	1.18	1.52	0.93	1.01	0.7	1.13	0.72	0.47	0.87	1.11	0.66	0.96	0.37	0.12	1.1
ENSG00000086189|DIMT1	41.94	39.95	49.17	37.3	48.24	48.25	40.28	37.18	41.55	38.2	47.27	52.41	39.98	38.14	50.9	41.75	22.8	53.12	35.91	42.54	60.08	36.86	39.78	51.02	35.88	36.47	58.87	53.84	64.58	51.5	46.67	59.13	44.66	36.62	34.98	55.62
ENSG00000086200|IPO11	21.81	24.22	13.5	21.99	15.02	13.6	16.31	16.44	12.12	14.91	16.85	12.87	17	13.93	14.96	15.74	20.38	14.6	20.25	14.06	14.06	13.96	14.14	10.94	18.68	17.93	14.55	17.39	18.69	19.83	16.47	21.82	13.47	14.28	16.52	17.56
ENSG00000086205|FOLH1	0	0	0	0	0	0	0	0	0	0	0	0	0	0	0	0	0	0	0	0	0	0.12	0.24	0	0	0	0	0	0.12	0	0	0	0	0	0	0
ENSG00000086232|EIF2AK1	79.09	70.53	62.78	74.11	69.05	71.89	64.97	79.09	64.42	85.88	62.63	58.55	75.83	72.72	54.74	68.94	46.84	67.22	77.07	71.99	60.89	73.14	59.2	58.04	64.2	58.73	59	78.2	70.38	73.8	67.69	61.86	57.7	64.82	66.77	59.42
ENSG00000086288|NME8	0.41	0	0	0	0	0	0	0.17	0	0	0	0	0	0	0	0	0	0	0	0	0	0	0	0	0	0	0	0	0	0	0.12	0	0	0	0.15	0
ENSG00000086289|EPDR1	12.1	9.64	5.88	11.57	4.14	5.39	8.43	7.09	5.9	11.98	7.61	5.82	14.83	11.42	5.21	15.14	12.44	4.09	16.02	11.66	6.94	18.76	15.55	5.08	13.98	16.34	5.48	10.7	9.59	2.87	6.69	8.77	3.03	8.34	12.28	3.85
ENSG00000086300|SNX10	16.32	20.65	33.64	17.95	27.87	34.51	17.21	28.7	13.43	9.41	23.05	40.29	13.02	24.42	39.61	6.79	8.39	23.8	8.8	23.74	39.86	14.47	16.69	27.19	8.29	13.17	24.79	7.55	5.26	13.88	3.03	3.21	16.18	5.75	8.01	18.93
ENSG00000086475|SEPHS1	144.18	146.49	77.38	137.05	88.15	71.56	81.62	74.89	106.4	126.11	94.27	76.47	115.6	93.48	47.05	97.21	60.47	42.76	128.89	109.88	52.05	125.68	137.62	72.69	102.85	96.27	41.71	137.17	99.82	72.3	140.98	117.29	65.77	92.67	105.78	57.13
ENSG00000086504|MRPL28	85.12	78.29	103.21	89.6	94.11	88.86	92.9	87.31	78.59	103.4	92.22	92.78	93.18	94.4	73.44	62.28	117.85	84.44	97.55	85.28	90.68	85.72	72.41	95.62	68.9	72.68	81.92	77.37	84.6	71.43	79.55	68.3	75.09	78.76	79.04	72.51
ENSG00000086506|HBQ1	4.35	1.93	3.72	3.53	2.82	1.23	5.43	2.59	1.18	0	1.07	1.25	2.07	0	0.95	0	0	0	1.05	1.14	0	3.18	0	1.28	0	1.08	1.01	1.08	0	1.06	0	0	1.28	0	0	1.02
ENSG00000086544|ITPKC	5.74	6.37	9.39	6.64	10.71	7.75	11.12	7.27	8.67	12.81	11.15	7.31	7.7	8.89	7.37	14.64	10.14	8.46	8.3	9.94	7.38	9	7.19	10.23	13.41	13.42	11.13	8.12	9.54	11.67	6.49	6.23	11.43	16.4	11.11	11.16
ENSG00000086548|CEACAM6	0	0	0	0	0	0	0	0	0	0	0	0	0	0	0	0	0	0	0	0	0	0	0	0	0	0	0	0	0	0	0	0	0	0	0	0
ENSG00000086570|FAT2	0.25	0.29	0.65	0.29	0.67	0.51	0.49	0.51	0.51	0.14	0.23	0.48	0.25	0.15	0.27	0.38	0.01	0.8	0.05	0.37	0.4	0.25	0.43	0.4	0.29	0.32	0.39	0.41	0.22	0.32	0.3	0.46	0.47	0.59	0.26	0.3
ENSG00000086589|RBM22	73.67	78.86	74.39	92.91	86.89	91.6	69.62	92.01	71.69	80.91	78.8	72.5	81.24	81.12	62.99	114.9	81.68	88.37	81.91	66.32	71.09	93.64	98.4	109.07	79.12	80.03	97.36	108.27	102.99	100.2	93.89	103.13	93.74	90.35	80.46	90.06
ENSG00000086598|TMED2	129.08	99.23	137.89	135.4	138.1	132.56	128.54	143.18	124.99	138.81	141.21	135.47	145.2	140.14	123.1	212.18	130.18	145.52	132.92	155.89	140.5	138.2	137.01	141.56	249.85	254.28	156.25	151.94	154.14	163.7	120.97	128.39	127.18	244.35	274.41	154.09
ENSG00000086619|ERO1B	11.86	8.4	12.2	8.4	15.75	17.64	13.23	11.61	14.64	9.93	7.2	8.06	9.7	8.59	10.14	37.05	15.5	23.25	8.63	8.36	9.21	9.37	9.94	12.86	40.63	38.45	23.19	8.36	12.05	13.74	10.73	10.14	17.26	37.48	36.31	20.16
ENSG00000086666|ZFAND6	111.9	92.54	165.51	81.31	123	152.27	141.71	199.25	124.18	98.37	127.78	116.66	98.24	91.75	112.52	89.17	95.55	70.28	102.26	107.25	126.79	106.47	93.13	89.19	76.19	88.67	71.3	117.3	110.71	71.36	120.88	100.19	92.12	73.08	96.31	61.49
ENSG00000086696|HSD17B2	1.72	9.85	0.92	7.74	0.31	0.07	2.9	1.36	0.93	0.89	0.06	0.07	0.85	0.28	0.11	1.26	0.02	0.04	1.77	0	0.03	2.1	0	0.07	3.48	0.06	0	1.18	0.2	0.01	0	0.06	0.07	10.82	1.33	0.45
ENSG00000086712|TXLNG	31.7	30.51	38.84	33.39	53.34	43.64	42.15	39.51	38.81	29.32	40.95	31.5	32.54	32.57	32.63	42.68	30.74	49.21	32.84	33.96	30.1	30.88	35.85	45	39.68	32.66	46.33	36.86	40.22	43.41	34.96	31.83	39.74	36.31	34.32	46.54
ENSG00000086717|PPEF1	1.18	1.7	11.34	2.98	4.66	11.6	7.64	7.09	2.74	0.45	1.82	10.6	0.5	2.86	18.17	1.28	0.46	15.66	2.52	2.47	10.94	1.59	0.83	9.66	0.39	0	8.6	0.39	2.01	3.43	0.95	0.2	1.73	0.27	0.52	4.09
ENSG00000086730|LAT2	2.43	3.36	0.92	0.67	2.35	1.7	2.05	1.76	1.34	2.27	1.24	1.29	1.09	2.34	1.68	3.1	2.04	1.77	1.43	1.24	3.57	1.73	1.59	3.64	1.28	1.95	1.1	1.29	2.7	1.82	1.32	1.22	2.18	0.73	1.67	2.82
ENSG00000086758|HUWE1	103.44	96	130.88	128.7	145.5	134.32	138.9	107.57	130.03	126.75	120.81	113.28	106.34	115.3	104.2	138.31	80.06	131.12	133.7	111.28	119.66	112.21	113.31	124.66	126.64	127.73	124.71	98.26	94.65	118.34	130.37	113.23	136.77	116.22	114.2	124.08
ENSG00000086827|ZW10	29.73	26.45	17.83	30.51	16.27	15.63	17.35	23.83	21.48	29.62	16.4	13.33	26.66	17.63	14.27	25.9	18.39	14.52	29.79	18.65	17.72	24.8	23.03	13.23	20.31	20.43	13.23	21.32	22.87	12.46	20.56	20.7	9.72	18.89	19.27	11.21
ENSG00000086848|ALG9	52.55	49.06	64.96	48.99	75.86	70.93	62.1	55.29	56.97	49.9	61.49	52.05	57.34	54.17	59.6	70.97	34.86	60.19	43.92	53.84	62.97	46.4	48.67	58.66	65.59	56.34	66.8	60.56	62.31	68.07	58.02	55.32	73.83	67.13	60.81	78.45
ENSG00000086967|MYBPC2	0.06	0.11	0.23	0.26	0	0.32	0.14	0.24	0.07	0	0	0	0	0	0.06	0	0	0.09	0	0.15	0	0	0.12	0.08	0.08	0	0	0.07	0	0.19	0	0	0	0.07	0	0.19
ENSG00000086991|NOX4	5.19	4.86	0.18	2.34	1.78	2.48	1.12	1.31	1.9	1.44	1.59	0.56	2.52	0.73	0.43	3.78	4.83	0.58	5.37	3.01	0.89	3.19	2.42	0.69	3.04	3.84	0.49	2.1	2.15	0.49	4.6	3.28	0.61	3.87	3.02	1.21
ENSG00000087008|ACOX3	12.8	10.86	19.56	10.97	16.19	23.39	21.04	18.77	15.34	13.88	18.26	22.74	12.29	14.27	14.94	14.77	11.49	23.55	11.89	17.35	15.21	12.11	14.05	12.1	12.97	13.19	12.97	9.94	16.12	11.07	11.28	15.82	16.87	15.81	13.18	14.79
ENSG00000087053|MTMR2	34.83	37.31	45.24	28.1	43.83	45.95	37.44	45.1	33.37	24.65	30.74	36.13	27.79	27.02	34.19	33.15	20.72	35.71	29.07	29.73	35.75	25.26	32.59	36.09	35.07	28.3	35.73	40.55	39.46	41.63	39.05	39.78	40.04	34.72	30.16	38.99
ENSG00000087074|PPP1R15A	56.3	95.11	83.43	63.16	82.36	106.03	121.73	113.6	105.71	61.52	102.89	81.22	87.44	100.37	85.81	165.33	134.85	128.2	72.17	85.38	79.6	106.83	103.08	158.61	242.46	199.96	128.69	107.05	101.4	173.44	99.71	74.97	178.88	273.83	270.89	158.17
ENSG00000087076|HSD17B14	5.68	8.65	0.93	6.85	0.88	3.54	3.97	4.88	1.75	6.02	4.28	2.55	6.06	3.97	4.36	15.65	34.29	3.81	2.05	3.33	0.73	18.15	17.82	2.4	28.35	36.96	4.19	5.57	7.14	5.84	6.15	6.84	3.82	18.41	30.42	1.28
ENSG00000087077|TRIP6	20.9	22.54	2.51	36.01	5.02	3.19	6.05	7.58	11.51	22.99	12.01	10.04	22.07	12.6	8.15	27.37	24.21	4.07	18.62	8.55	5.06	38.33	23.94	8	22.81	30.16	5.98	19.6	15.76	9.26	14.6	16.89	6.98	25.12	36.47	3
ENSG00000087085|ACHE	1.58	1.36	28.33	1.35	37.84	34.57	26.52	7.17	12.07	1.67	9.2	18.95	1.22	11.12	24.2	1.61	2.65	17.86	1.08	7.34	14.71	3.1	2.72	19.7	3.66	2.7	21.03	1.3	2.19	13.59	2.37	3.22	19.39	2.03	2.47	15.4
ENSG00000087086|FTL	675.59	760.97	629.28	690.07	670.23	666.58	695.6	745.47	760	776.48	774.48	546.76	761.63	804.42	564.48	1049.81	1815.2	685.01	701.82	698.85	594.31	869.68	981.08	826.16	1471.07	2319.96	772.38	745.7	808.57	729.57	663.6	774.67	640.85	1296.5	1817.39	673.34
ENSG00000087087|SRRT	258.92	226.41	200.71	228.26	188.59	206.19	225.09	148.36	252.31	332.57	229.12	254.34	261.34	246.67	208.8	348.12	261.37	306.32	310.66	261.35	182.15	454.07	338.99	404.66	315.29	281.45	258.18	297.95	276.8	273.26	376.94	379.95	324.94	366.7	271.81	349.86
ENSG00000087088|BAX	83.67	88.04	63.16	93.83	60.41	56.52	77.76	85.87	92.08	117.69	74.12	83.73	117.8	98.39	69.57	129.65	186.94	89.19	112.03	116.77	70.84	111.19	101.72	121.78	124.94	146.21	100.91	104.09	110.99	72.94	101.89	104.45	76.12	72.96	107.73	85.14
ENSG00000087095|NLK	22.11	18.78	42.34	18.48	50.92	40.68	33.54	22.19	29.82	16.76	25.84	29.96	17.42	19.6	27.35	20.39	8.68	26.53	16.97	23.72	24.33	18.73	19.96	29.19	17.3	14.91	26.6	26.53	22.38	42.28	18.47	19.75	27.12	17.83	16.33	25.27
ENSG00000087111|PIGS	41.88	38.77	59.53	48.73	44.26	52.89	58.43	44.4	47	40.19	50.13	42.07	37.91	44.11	47.37	37.44	26.87	39.77	35.26	41.64	50.86	32.74	34.7	45.67	31.6	38.17	47.22	31.48	36.97	45.59	35.78	35.28	42.69	32.68	30.2	40.6
ENSG00000087116|ADAMTS2	2.93	4.91	3.26	2.88	9.11	6.39	3.42	1.08	3.08	1.33	0.41	0.4	1.51	0.66	0.12	0.39	0.51	0.57	1.46	0.75	0.56	0.94	0.48	0.37	0.4	0.07	0.24	0.11	0.09	0.86	3.92	0	0.08	0.19	0.07	0.13
ENSG00000087128|TMPRSS11E	0	0	0	0	0	0	0	0	0	0	0	0	0	0	0	0	0	0	0	0	0	0	0	0	0	0	0	0	0	0	0	0	0	0	0	0
ENSG00000087152|ATXN7L3	67.09	60.39	137.34	69.32	121.26	105.02	161.92	89.49	119.99	72.39	112.02	134.23	91.83	92.81	108.29	89.3	50.03	140.94	66.57	90.69	129.36	73.81	81.31	141.7	79.66	60.95	123.34	97.15	68.86	108.03	79.85	75.77	152.97	110.56	60.36	136.39
ENSG00000087157|PGS1	35.01	35.53	42.88	40.99	58.01	43.73	44.3	43.35	36.02	40.52	32.73	44.19	33.64	37.59	44.01	41.29	17.31	37.42	40.75	43.64	47.09	32.13	32.03	29.58	40.39	35.93	30.53	31.42	38.95	35.69	42.69	35.3	28.88	46.61	42.29	33.34
ENSG00000087191|PSMC5	131.03	90.85	144.63	115.47	124.86	133.79	147.76	134.35	135.41	138.93	121.22	129.73	116.68	118.71	111.07	121.44	174.82	142.62	120.96	135.37	126.24	114.06	108.16	138.45	117.64	103.98	142.16	100.11	96.35	121.49	99.16	108.97	119.18	116.21	108.27	137.28
ENSG00000087206|UIMC1	91.37	56.31	49.19	40.15	75.55	73.08	72.68	61.27	66.63	45	59.73	56.67	53.72	58.55	92.52	67.67	72.34	90.95	52.76	61.68	48.36	50.93	51.23	79.04	65.52	63.22	113.31	50.87	56.64	76.62	72.12	58.11	66.45	62.88	57.33	83.56
ENSG00000087237|CETP	0	0.13	0	0.15	0.41	0.18	0	0	0.65	0	0	0.22	0.18	0.16	0	0	0.52	0	0	0	0	0.46	1.08	0.18	0.21	0.46	0.61	0.63	0.31	0	0.13	1.12	0.55	0.33	0.19	0
ENSG00000087245|MMP2	3.83	2	9.44	7.29	5.76	4.6	12.45	4.85	4.11	0.53	0.08	0.5	0	0	0.07	0.13	0.79	0	0.94	0.17	0.13	0.68	4.34	2.36	0.15	1.08	1.03	28.97	58	7.53	16.64	32.95	0.74	3.08	2.3	0
ENSG00000087250|MT3	20.14	18.9	10.74	24.74	6.09	7.46	10.39	8.87	8.2	29.53	19.53	3.27	39.42	20.04	2.95	4.58	76.57	1.39	25.73	12.6	6.01	67.62	90.34	9.99	2.84	14.34	3.71	31.11	45.33	9.18	25.73	19.02	1.11	2.44	7.48	2.16
ENSG00000087253|LPCAT2	1.83	2.56	2.34	2.29	1.62	3.41	2.36	2.05	2.83	1.04	2.27	0.71	2.14	0.61	1.74	1.35	0.2	0.64	1.96	1	1.73	0.81	0.62	2.3	0.1	0.74	0.36	2.01	1.54	1.62	0.49	1.09	0.43	1.11	0.09	0.21
ENSG00000087258|GNAO1	54.26	55.87	316.49	58.09	251.62	315.17	202.14	113.93	179.37	67.13	179.4	326.22	76	194.18	325.97	83.34	49.65	248.45	62.46	182.63	313.81	84.06	104.3	225.57	80.96	94.13	242.46	48.28	101.75	180.29	69.42	93.02	223	64.4	73.57	199.17
ENSG00000087263|OGFOD1	47.22	58.24	47.99	53.44	35.53	51.43	44.84	51.57	48.96	31.97	50.72	50.99	36.71	34.91	35.49	54.91	20.58	49.92	62.6	56.27	61.93	38.33	43.16	50.15	44.57	44.59	51.52	50.86	49.43	68.51	34.61	26.7	52.73	51.12	42.78	37.61
ENSG00000087266|SH3BP2	32.56	28.89	77.94	26.67	86.57	88.6	65.39	41.79	59.82	41.67	74.91	98.75	49.9	93.34	106.95	67.32	35.56	110.88	37.21	69.01	106.72	62.98	67.06	118.62	59.53	60.17	105.11	41.62	47.92	98.48	56.11	61.56	127.01	69.55	54.89	116.63
ENSG00000087269|NOP14	22.62	20.18	17.32	24.95	12.94	14.61	15.1	15.09	17.24	20.24	17.06	15.15	16.59	14.45	15.09	24.43	12.83	26.28	22.68	17.36	14.48	18.38	14.51	16.45	21.17	19.8	20.37	21.11	19.97	27.33	18.82	16.84	18.39	19.55	21.79	22.71
ENSG00000087274|ADD1	162.25	153.52	216.21	169.41	221.98	213.17	217.86	185.78	193.95	174.56	222.37	223.36	198.11	216.14	220.71	260.18	189.33	221.65	185.84	212.8	227.91	243.33	264.32	209.11	241.98	217.59	220.24	211.04	245.06	196.41	272.43	262.46	239.33	245.56	243.33	226.96
ENSG00000087299|L2HGDH	25.13	15.06	19.21	10.31	15.66	15.67	16.84	14.74	17.86	11.46	14.36	15.04	11.73	14.23	14.18	12.92	4.74	20.2	16.48	13.58	15.31	12.43	11.41	12.94	9.81	12.51	17.2	13.59	9.61	19.08	11.82	16.19	15.96	10.33	6.82	16.01
ENSG00000087301|TXNDC16	32.93	25.45	47.25	26.33	69.43	57.76	49.87	48.51	53.85	31.38	32.83	34.93	31.21	30.48	32.19	27.79	14.06	38.76	25.82	31.03	36.09	30.13	38.65	50.77	25.45	25.74	33.62	28.13	29.28	47.49	26.89	30.15	60.83	24.49	22.23	41.61
ENSG00000087302|RTRAF	298.41	287.64	148.08	282.93	166.62	172.83	160.95	195.09	247	231.7	190.72	187.55	260.49	232.6	166.53	212.66	340.37	176.56	249.2	183.69	203.87	245.71	226.7	219.87	225.55	261.25	214.22	207.99	217.1	162.85	218.34	221.62	176.37	237.91	244.44	195.77
ENSG00000087303|NID2	3.33	2.15	3.63	4.12	4.27	4.26	2.15	0.53	2.51	2.25	0.99	2.5	0	2	0.98	0.43	1.8	2.01	5.79	3.25	3.79	1.96	2.14	3.36	1.04	2.57	2.28	2.95	4.2	5.66	1.14	1.96	4.01	2.56	1.52	4.06
ENSG00000087338|GMCL1	26.7	31.48	21.31	32.37	18.09	25.05	20.48	23.66	26.1	26.43	27.4	21.58	28.82	24.97	21.41	29.44	22.41	30.85	29.67	30.92	24.25	32.91	30.37	26.16	30.99	28.04	26.71	35.18	35.43	29.64	40.42	36.08	32.92	32.16	25.91	28.72
ENSG00000087365|SF3B2	237.91	222.49	210.06	211.42	201.76	209.33	203.9	179.91	223.63	222.56	208.57	201.26	204.95	190.15	191.14	269.59	370.49	262.05	238.16	225.15	211.93	247.25	232.88	239.6	331.09	275.73	286.93	272.49	253.04	261.94	250.11	252.55	221	293.46	301.58	265.13
ENSG00000087448|KLHL42	36.44	24.15	49.24	32.33	67.54	53.94	48.64	34.8	42.53	34.59	35.12	39.56	35.08	40.44	36.69	47.27	24.34	52.42	35	39.73	41.91	34.16	46.31	49.02	42	37.62	49.91	47	49.36	54.85	45.3	44.69	56.99	46.15	42.81	55.87
ENSG00000087460|GNAS	1081.86	805.23	1567.04	1000.32	1422.37	1466.9	1490.83	867.49	1297.65	1001.89	1253.45	1416.25	1005.11	1396.57	1276.83	893.58	776.51	1093.35	1025.82	1180.22	1346.75	979.29	1037.96	1238.86	837.83	790.79	1163.89	1181.93	1130.65	1165.76	1216.97	1189.29	1208.36	946.97	940.07	1097.32
ENSG00000087470|DNM1L	144.63	104.44	198.66	115.98	207.46	226.46	202.26	172.95	165.7	120.64	176.42	191.65	110.49	146.92	206.96	180.46	75.48	227.26	128.25	180.17	188.22	130.06	148.45	188.21	140.36	137.92	203.2	145.37	186.78	212.71	156.23	143.76	195.76	146.35	111.34	201.36
ENSG00000087494|PTHLH	2.86	0.47	0	2.33	0.54	0	1.33	1.44	0	0	0	0.27	0.4	0.41	0	0.16	0	0	2.44	1.62	0.38	0.56	0.15	0.19	4.43	0.4	0.38	0.23	0.15	0.52	0	0.17	0	3.16	0.47	0
ENSG00000087495|PHACTR3	1.5	1.43	36.22	0.63	35.94	41.83	19.56	19.9	17.33	0.9	12.41	20.35	1.16	9.15	15.38	1.57	0.96	20.64	0.46	10.76	24.78	0.7	2.95	23.7	2.21	1.39	30.58	2.12	8.59	25.1	2.94	6.04	29.48	2.14	2.44	20.15
ENSG00000087502|ERGIC2	90.51	98.72	102.35	89.68	117.96	103.18	72.67	94.89	72.16	108.42	78.48	100.24	86.33	59.38	95.68	104.03	54.39	78.28	65.82	76.82	80.38	92.45	97.77	105.96	81.48	108.6	88.85	56.34	101.42	78.27	84.47	113.45	107.32	80.77	88.48	66.5
ENSG00000087510|TFAP2C	35.35	36.71	18.86	38.75	3.58	5.95	12.52	10.84	38.31	72.28	16.92	0.74	85.37	24.56	0.41	94.03	71.4	0.69	67.01	21.26	2.04	91.54	67.84	1.82	69.73	78.99	2.67	37.93	31	4.06	51.17	41.57	3.44	45.6	58.88	1.59
ENSG00000087586|AURKA	35.67	48.63	2.39	38.9	4.94	4.08	7.7	11.79	31.29	29.66	16.78	1.54	23.01	17.77	1.49	24.78	28.61	5.17	24.71	17.84	3.34	38.16	42.01	4.34	18.47	26.89	3.18	42.3	29.42	2.61	40.53	44.93	2.47	9.55	22.15	1.47
ENSG00000087589|CASS4	0.09	0.15	0.21	0.16	0.49	0.1	0.19	0.21	0	0.18	0.09	0.12	0.1	0	0.25	0.25	0	0.11	0.09	0	0	0.26	0.39	0.1	0.2	0.18	0.25	0.19	0.38	0.5	0.08	0.09	0	0	0.39	0.16
ENSG00000087842|PIR	12.12	11.67	5.85	14.62	2.54	2.18	4.96	11.23	5.98	17.05	9.06	5.51	17.74	10.74	5.92	41.61	58.54	0.91	11.95	7.79	9.14	58.96	40.81	3.26	47.27	68.35	0.88	11.32	15.65	5.36	13.85	16.43	2.2	21.13	48.42	1.31
ENSG00000087884|AAMDC	29.18	25.23	3.89	45.41	10.29	2.99	9.89	17.13	10.89	38.67	21.09	11.17	39.1	11.29	6.31	42.3	48.9	6.24	51.75	27.69	5.61	38.16	36.12	8.54	14.3	20.03	9.03	34.92	34.3	11.03	40.2	48.23	7.46	17.19	22.62	5.25
ENSG00000087903|RFX2	20.2	23.55	5.19	20.28	3.1	3.8	4.95	4.76	9.45	15.42	9.48	5.2	9.03	5.54	4.8	10.74	6.27	2.62	20.83	8.76	4.15	8.7	10.24	2.45	12.03	13.94	3.46	9.44	7.35	2.07	7.53	10.11	1.58	21.67	22.71	8.35
ENSG00000087995|METTL2A	36.78	30.69	49.11	35.96	48.85	43.41	47.54	37.37	42.94	28.71	37.2	32.82	29.24	40.7	33.21	37.76	14.99	48.8	36.58	33.01	34.9	28.15	33.63	37.64	34.93	35.89	45.49	31.85	36.09	46.95	33.61	32.21	39.86	41.55	30.51	46.99
ENSG00000088002|SULT2B1	0.39	0	0	0	0.26	0.24	0.2	0	0.42	0.19	0	0.69	0.2	1.23	0.17	0.39	0	0.52	0.57	0	0	1	0.18	1.84	0.14	0.05	0.18	0.13	0.1	0	0.17	0.21	0	0	0.21	0.75
ENSG00000088035|ALG6	31	23.95	25	18.3	18.64	17.59	18.18	21.09	24.5	16.41	25.09	25.01	22.87	22.67	28.32	20.82	15.51	26.47	24.78	22.23	33.53	21.41	26.54	19.08	18.05	20.12	21.83	20.92	15.84	19.32	19.05	20.63	23.47	15.34	13.15	20
ENSG00000088038|CNOT3	50.18	67.87	48.54	56.82	47.74	46.49	53.45	31.02	57.18	44.64	39.05	33.21	52.67	47.01	50.26	80.09	55.07	59.09	54.17	51.23	43.46	57.71	57.74	45.67	75.93	88.14	50.87	70.89	45.87	51.64	61.89	65.78	61.62	87.64	68.27	48.79
ENSG00000088053|GP6	0.11	0.19	0.54	0	1.68	0.42	0.41	0.5	0.13	0	0.42	0.14	0	0.25	0.77	0.11	0	0.3	0	0.26	0	0.35	0	0.48	0	0.43	0	0	0.36	0.79	0.61	0.49	0.47	0.47	0.37	0.79
ENSG00000088179|PTPN4	29.87	19.28	36.08	22.68	29.73	23.12	23.01	29.93	34.34	22.58	37.56	27.35	23.02	44.21	35.71	31.56	14.72	74.81	18.72	36.39	31.47	26.66	45.67	99.88	28.47	21.14	53.21	25.12	26.23	83.61	29.91	20.56	127.66	34.33	29.53	98.63
ENSG00000088205|DDX18	82.71	67.23	76.59	62.27	88.24	72.02	61.89	78.03	68.98	63.73	56.41	56.26	56.22	53.22	51.49	87.5	61.9	88.05	62.8	55.23	56.42	64.57	71.29	59.37	86.12	80.89	70.57	85.66	82.61	101.53	73.51	75.61	78.31	94.62	82.01	84.2
ENSG00000088247|KHSRP	393.35	406.88	288.91	430.79	292.34	276.81	321.94	165.73	399.6	407.96	284.48	262.87	359.83	257.72	261.98	331.71	104.97	281.07	425.2	318.72	288.22	376.52	337.36	268.82	349.39	336.05	236.75	371.48	318.57	248.77	362.06	348.56	202.7	304.35	305.36	254.33
ENSG00000088256|GNA11	48.5	37.13	51.3	47.47	38.14	44.04	47.38	41.53	46.6	52.49	69.46	55.47	52.59	56.6	58.17	50.59	27.35	76.85	43.67	64.3	59.7	45.86	60.32	47.58	58.82	73.38	54.84	53.73	64.07	54.19	53.82	49.95	70.43	71.9	51.48	62.22
ENSG00000088280|ASAP3	44	54.92	16.06	61.16	18.5	18.98	27.96	26.4	32.43	47.5	29.48	16.42	46.83	27.15	17.44	37.32	24.43	22.14	43.87	29.74	16.4	39.78	35.72	25.43	39.86	34.4	15.62	29.02	26.93	16.81	38.83	45.4	31.03	44.5	27.22	17.56
ENSG00000088298|EDEM2	11.47	9.87	10.32	10.25	8.35	9	11.56	12.61	8.49	9.7	13.1	10.24	8.8	13.87	12.52	10.03	12.77	13.85	9.44	12.39	11.79	9.98	13.19	13.32	15.51	18.14	12.53	10.26	11.34	11.98	10	11.08	15.68	16.24	15.43	15.34
ENSG00000088305|DNMT3B	16.74	19.04	18.95	13.78	24.42	29.69	27	25.48	27.11	11.58	14.36	7.72	10.34	9.2	4.73	8.37	3.57	5.08	11.96	14.12	8.39	8.68	9.99	6.86	6.1	5.87	3.99	15.2	8.37	8.29	15.44	12.95	8.24	9.29	7.61	4.29
ENSG00000088320|REM1	0	0	0	0	0	0	0	0	0	0	0	0	0	0	0	0	0	0	0	0	0	0	0	0	0	0	0	0	0	0	0	0	0	0	0	0
ENSG00000088325|TPX2	112.9	109.13	5.24	104.42	2.77	4.77	13.34	31.02	63.61	78.45	37.53	3.4	86.61	44.55	2.39	75.41	68.75	2.48	85.96	52.22	5.93	99.5	94.85	3.45	42.74	75.8	4.27	104.14	72.32	3.77	136.41	138.35	3.84	38.5	68.84	2.71
ENSG00000088356|PDRG1	29.06	25.61	39.38	25.45	49.64	40.6	47.24	35.38	26.33	28.31	32.41	32.89	32.9	38.47	41.09	42.86	62.23	52.27	27.73	31.75	32.64	33.92	30.76	39.63	36.6	29.86	40.57	28.35	34.13	43.67	33.06	33.36	32.85	46.08	38.94	50.25
ENSG00000088367|EPB41L1	18.3	25.69	106.82	20.23	113.83	101.21	78.39	50.03	55.56	10.9	24.67	55.03	12.68	31.53	61.78	16.92	6.37	60.68	11.22	31.52	65.5	14	20.76	39.1	13.43	12.52	43.62	14.5	22.79	45.53	16.25	22.02	47.23	14.15	15.64	40.18
ENSG00000088386|SLC15A1	0.08	0.27	0.09	0.25	0.66	0.28	0.17	0.09	0.37	0.15	0.76	0	0.3	0.18	0.39	0.85	0.78	0.75	0.17	0.56	0.16	0.33	0.24	0.26	0.37	0.76	0.39	0.39	0.08	0.15	0.44	0	0.22	0.38	0.17	0.58
ENSG00000088387|DOCK9	8.18	8.31	44.52	12.49	15.42	20.18	15.62	18.09	9.28	7.46	41.96	67.7	12.6	51.5	89.16	8.47	7.04	62.95	9.11	43.59	72.58	5.9	23.07	57.85	10.58	4.6	54.54	8.28	9.5	30.44	5.68	8.09	61.03	8.63	4.61	28.3
ENSG00000088448|ANKRD10	197.82	179.14	182.47	191.3	258.01	206.93	212.18	164.64	211.15	218.61	175.39	173.18	209.02	165.73	160.38	217.1	174.64	213.36	250.34	189.65	155.59	243.37	247.58	203.89	235.3	204.35	220.97	253.88	262.93	224.33	327.62	290.82	248.42	224.28	214.27	232.52
ENSG00000088451|TGDS	13.71	13.77	3.68	12.29	7.68	7.28	5.69	5.73	8.98	9.08	1.78	3.24	9.17	5.66	1.33	14.88	11.64	4.88	10.03	3.99	3.83	11.78	9.95	4.25	16.79	15.7	4.79	9.61	7.21	5.75	8.81	5.16	4.82	12.36	12.82	5.15
ENSG00000088538|DOCK3	11.65	10.43	36.86	12.55	36.82	33.67	30.44	22.81	24.62	10.52	17.62	31.25	11.64	18.25	35.43	22.16	6.99	41.53	8.81	18.22	34.79	13.83	17.43	19.28	22.71	21.4	34.87	11.12	13.84	22.47	14.5	14.05	29.18	25.57	22.16	35.09
ENSG00000088543|C3orf18	16.31	13.42	31.58	20.52	38.57	25.65	20.93	29.44	37.08	17.83	16.44	42.22	24.96	30.79	38.11	17.8	11.33	41.94	11.18	31.99	35.51	24.5	24.62	22.43	24.43	24.46	23.95	20.54	19.1	27.59	22.12	27	32.44	15.57	15.65	23.36
ENSG00000088682|COQ9	51	43.95	44.27	48.32	52.73	49.69	44.66	40.08	48.09	58.63	37.23	34.03	46.46	40.73	36.97	43.85	50.41	40.37	67.06	45.33	36.09	54.92	45.72	39.01	54.24	51.89	49.53	51.06	42.12	47.14	51.99	51.63	48.67	54.78	44.19	46.15
ENSG00000088726|TMEM40	0.17	0	0.43	0	1.01	0	0	0	0.4	0.34	0	0	0.72	0.4	0	0.36	0.55	0	0	0	0	0.16	0.16	0	0	0.38	0.36	0.38	0	0	0	0	0.45	0	0.36	0
ENSG00000088727|KIF9	9.6	6.19	6.48	8.19	10.57	6.7	9.5	9.54	5.53	8.02	6.02	9.34	5.88	6.81	8.14	1.36	16.78	3.79	10.57	3.58	7.95	4.75	6.79	4.02	5.04	9.64	5.71	8.88	9.49	6.47	6.55	5.53	2.43	10.17	8.75	6.2
ENSG00000088756|ARHGAP28	10.01	6.11	6.86	9.73	15.26	9.99	10.74	9.26	7.32	7.15	5.46	7.65	6.26	6.45	2.64	15.62	3.42	5.19	5.9	6.74	3.63	10.78	12.59	9.33	9.74	7.03	5.71	8.95	12.44	22.57	10.92	13	12.87	11.35	9.21	10.31
ENSG00000088766|CRLS1	49.82	46.6	42.13	47.81	23.06	36.78	30.61	33.98	22.16	49.55	42.02	32.11	52.53	47.03	39.69	54.03	44.1	49.33	53.32	56.5	40.57	41.94	50.56	40.59	62.7	63.51	53.18	58.64	64.68	42.63	60.1	76.51	52.06	49.25	47.93	54.21
ENSG00000088782|DEFB127	0	0	0	0	0	0	0	0	0	0	0	0	0	0	0	0	0	0	0	0	0	0	0	0	0	0	0	0	0	0	0	0	0	0	0	0
ENSG00000088808|PPP1R13B	19.14	16.46	33.23	14.7	38.22	34.03	24.68	14.31	21.89	13.97	20.4	25.18	15.51	21.58	22.3	20.19	15.16	25.41	14.09	18.04	25.78	11.36	13.83	25.45	18.12	14.69	23.85	14.41	15.34	28.62	14.09	13.01	34.3	11.23	9.78	25.05
ENSG00000088812|ATRN	25.18	24.39	46.53	29.22	45.64	41.84	39.88	30.8	32.92	25.95	30.46	38.89	28.38	32.19	40.99	30.15	18.56	38.55	28.6	33.08	41.31	22.08	27.58	29.72	27.83	27.98	34.27	29.53	33.09	36.61	26.99	28.4	32.92	29.71	29.76	34.08
ENSG00000088826|SMOX	16.57	15.73	12.78	17.42	41.18	18.11	19.65	14.47	18.78	19.2	17.77	69.34	19.01	19.29	14.01	26.63	43.72	17.2	19.04	18.1	15.88	21.95	20.14	15.63	30.15	31.4	15.82	19.88	21.6	37.4	19.81	20.5	17.36	28.35	31.15	14.34
ENSG00000088827|SIGLEC1	0.05	0.09	0.16	0	0.15	0.16	0.07	0.06	0	0	0	0.08	0.07	0	0.05	0.19	0	0.77	0.11	0.12	0	0	0	0.06	0	0.11	0.68	0.11	0.04	0.18	0	0	0	0	0	0.71
ENSG00000088832|FKBP1A	118.65	105.16	184.84	113.84	148.1	187.36	174.82	175.96	140.44	140.24	175.41	162.81	151.52	191.88	169.03	115.83	80.61	119.16	134.53	190.25	198.42	112.89	120.82	145.55	122.2	111.93	132.62	75.91	96.52	115.87	73.53	84.78	98.01	104.62	104.86	121.78
ENSG00000088833|NSFL1C	87.81	83.15	107.96	89.92	105.3	101.01	85.54	93.36	91.41	82.81	80.55	74.74	84.72	81.01	79.02	85.05	113.25	82.14	93.87	99.07	88.57	86.68	84.63	82.29	116.66	99.25	90.73	109.02	108.21	107.69	106.56	104.57	84.7	110.21	116.85	112.23
ENSG00000088836|SLC4A11	1.02	0.22	0	0.08	0.22	0.1	1.17	0.31	0.28	0.97	1.21	0.32	1.47	0.62	0	0.25	0.31	0	0.72	0.63	0	0.5	0.23	0.1	0.38	0.73	0.17	0.27	0.34	0.33	0.29	0.35	0	1.33	2.01	1.09
ENSG00000088854|C20orf194	22.18	23.42	49.9	19.42	64.47	54.06	55.05	37.27	46.51	21.91	37.57	40.33	28.46	39.31	41.02	35.23	16.11	48.55	23.58	40.29	38.53	29.07	35.37	50.03	36.54	29.05	43.24	28.49	37.34	48.12	34.43	35.31	60.83	36.73	30.73	45.35
ENSG00000088876|ZNF343	11.25	10.89	16.96	14.31	18.59	16.2	15.99	12.7	12.22	17.45	13.92	15.45	11.8	10.45	18.26	19.33	8.69	26.24	13.37	16.14	17.29	16.05	18.62	14.15	15.3	12.46	19.4	12.94	12.43	14.36	11.52	16.65	18.78	13.69	11.07	16.23
ENSG00000088881|EBF4	17.15	24.87	19.68	32.13	34.27	28.01	19.12	10.94	32.77	24.65	18.03	13.82	33.64	21.53	13.87	32.47	32.7	31.15	28.55	23.96	11.35	36.23	37.16	35.47	40.23	40.17	37.78	32.96	33.07	29.47	47.21	44.4	51.34	42.45	46.97	39.65
ENSG00000088882|CPXM1	55.97	53.22	13.69	71.03	20.41	23.6	20.96	31	33.96	50.31	25.35	4.96	48.99	24.66	5.09	36.84	47.44	14.35	53.77	31.78	5.02	55.99	48.69	20.93	33.51	37.19	14.98	49.71	39.43	23.05	46.53	41.61	25.63	31.58	29.16	17.72
ENSG00000088888|MAVS	17.71	17.55	16.59	19.35	16.99	13.75	19.05	12.09	18.04	22.25	18.26	16.66	20.85	19.7	15.57	27.73	13.21	18.39	22.87	20.82	18.97	25.65	25.49	17.06	29.01	27.69	16.53	22.36	24.6	17.93	25.56	26.03	21.28	24.24	25.3	17.96
ENSG00000088899|LZTS3	16.26	18.68	36.29	17.24	40.83	37.75	30.54	16.11	26.77	17.61	24.62	30.66	16.35	25.45	31.27	21.51	12.24	32.66	13.4	19.07	27.44	22.9	23.49	40.25	22.13	27.35	34.9	13.09	16.57	38.08	15.79	18.23	47.1	18.66	21.24	35.39
ENSG00000088926|F11	0	0	0	0	0	0	0	0	0	0	0	0	0.14	0	0	0	0	0	0	0.15	0	0	0	0	0	0	0.13	0	0	0	0	0	1.14	0	0	0.13
ENSG00000088930|XRN2	94.71	90.41	95.16	101.5	97.29	93.35	98.6	114.96	95.35	84.5	104.53	89.85	85.22	95.07	87.25	88.76	50.04	97.39	89.58	100.78	94.86	79.26	83.79	94.4	94.73	74.89	97.57	82.79	85.67	90.42	94.16	84.44	101.61	89.05	79.44	100.31
ENSG00000088970|KIZ	7.77	8.93	9.44	8.01	16.27	17.31	15.31	15.53	13.23	6.51	18.87	12.98	11.65	15.67	18.96	18.6	17.71	17.1	5.61	14.01	16.41	17.7	11.47	19.27	19.97	16.71	15.57	26.7	22.87	17.65	27.47	31.99	19.22	25.43	21.69	17.56
ENSG00000088986|DYNLL1	388.97	390.55	610.71	385.26	439.74	554.47	489.22	574.38	439.32	378.88	612.64	908.73	406.13	565.21	944.64	326.5	504.02	383.28	411.94	625.61	1026.21	420.42	433.4	540.62	308	289.8	399.31	408.28	418.84	381.14	434.19	398.8	394.3	290.44	282.11	317.9
ENSG00000088992|TESC	1.12	0	1.68	0.43	0.42	0	0.76	0.43	0.72	0.68	1.67	0.75	0.37	0.46	0.57	0.36	0	3.71	0.42	0	3.5	0	0	3.01	0	0	0	0.38	0	0.71	0.27	0	0	0.48	0	0
ENSG00000089006|SNX5	145.17	143.01	47.16	158.71	44.04	54.23	60.11	71.98	90.12	134.76	103.38	51.32	134.25	89.88	56.86	149.38	126.58	84.05	143.32	100.83	57.3	154.55	158.02	79.35	136.85	156.54	97.14	141.36	139.66	108.08	142.5	135.42	82.9	118.81	134.78	75.02
ENSG00000089009|RPL6	2046.79	2253.27	1081.64	2236.18	1263.44	1227.47	1418.93	1691.05	1611.16	1987.62	1533.27	1492.7	1752.69	1546.58	1585.37	1656.05	2399.28	1591.88	1933.54	1462.28	1435.53	1592.86	1473.66	1363.41	1789.76	1841.65	1764.58	1820.13	1785.37	1386.92	1672.99	1691.74	1315.29	1997.9	2058.58	1658.76
ENSG00000089012|SIRPG	0	0	0	0	0	0	0	0	0	0	0	0	0	0	0	0	0	0	0	0	0	0	0	0	0	0	0	0	0	0	0	0	0	0	0	0
ENSG00000089022|MAPKAPK5	59.47	52.05	59.22	52.4	70.3	59.35	69.14	56.51	56.97	46.16	58.12	51.46	57	46.54	42.06	56.15	47.29	72.18	54.06	59.42	60.46	51.94	42.51	60.86	50.18	45.6	59.7	53.58	57.08	87.31	56.09	57.59	67.12	60.58	55.52	80.88
ENSG00000089041|P2RX7	0.35	0.2	1.06	1.08	0.23	0.56	0.51	0.32	0.15	1.17	0.29	0.41	0.31	1.26	0.39	0.67	0.44	0.7	0.18	0.45	0.27	0.75	0.81	0.41	0.31	0.52	0.31	7.43	9.81	0.51	6.61	8.31	0.27	0.27	0.29	0.22
ENSG00000089048|ESF1	43.46	43.44	40.78	37.18	36.11	41.11	30.99	41.52	35.77	45.75	38.78	40.72	37.6	35.28	38.1	51.5	67.93	46.78	42.69	38.12	34.63	42.81	41.59	47.73	56.31	51.98	46.72	46.07	44.44	47.07	42.39	40.55	37.9	45.91	47.39	44.24
ENSG00000089050|RBBP9	27.96	23.18	21.3	31.79	22.65	20.71	20.07	21.28	27.36	28.79	21.57	15.38	29.14	22.05	16.69	34.08	14.44	21.25	28.98	22.5	18.3	30.49	30.64	19.94	27.31	25.58	18.65	25.83	29.72	21.75	25.73	26.54	22.91	19.4	25.46	14.86
ENSG00000089053|ANAPC5	114.4	101.58	133.4	100.5	151.19	123.89	95.31	111.42	101.83	98.21	125.89	136.92	101.54	142.59	143.02	112.12	128.06	117.86	105.81	108.61	148.33	110.54	119.67	112.81	115.73	101.07	122.29	126.45	116.69	110.93	133.88	142.24	123.78	94.15	108.57	140.38
ENSG00000089057|SLC23A2	22.08	20.88	54.8	33.87	53.25	49.51	47.31	36.93	40.07	19.94	32.47	39.63	21.05	31.14	41.39	27.94	6.2	50.79	19.76	32.34	39.11	20.86	25.13	41.25	24.79	26.48	49.81	27.51	33.75	49.38	24.78	28.17	45.21	27.12	25.76	43.79
ENSG00000089060|SLC8B1	3.54	4.04	4.89	8.59	5.03	5.13	8.88	7.19	6.98	4.27	13.55	9.16	5.9	9.49	12.64	7.18	6.52	10.6	7.51	10.45	11.1	11.16	8.17	9.67	7.54	11.31	11.32	4.98	6.07	9.32	11.9	6.1	18.77	12.75	6.03	11.31
ENSG00000089063|TMEM230	49.79	45.51	38.89	62.38	50	42.58	38.31	41.27	41.06	52.68	35.16	36.15	48.24	32.7	38.2	57.98	41.94	37.56	42.69	45.37	43.67	58.88	60.16	42.06	54.9	62.98	43.4	54.47	53.58	46.6	58.11	62.37	43.19	55.82	71.99	42.89
ENSG00000089091|DZANK1	7.81	11.78	10.8	9.52	10.86	15.33	8.25	9.53	16	9.25	10.44	10.47	11.37	10.5	11.26	16.23	7.54	14.38	10.76	12.8	12.38	16.09	12.81	15.34	10.93	11.86	17.61	9.71	11.44	13.97	9.22	7.74	11.19	8.79	10.98	15.07
ENSG00000089094|KDM2B	56.18	49.54	58.35	52.44	62.11	67.38	53.81	42.91	57.5	61.01	72.1	71.33	58.9	80.57	77.6	59.49	56.52	78.77	61.83	74.39	62.18	58.46	60.31	77.53	62.43	53.78	73.6	70.5	77.52	89.73	74.39	68.66	95.8	69.85	57.55	86.64
ENSG00000089101|CFAP61	1.86	1.88	1.1	1.84	0.9	2.48	0.53	3.41	0.28	0	0.12	0	0.2	2.3	0.29	20.89	5.76	1.83	3.06	0.64	0	1.8	0.42	1.06	28.54	54.04	1.37	1.06	2	2.93	0.46	0	1.75	25.14	47.03	5.86
ENSG00000089116|LHX5	4.16	5.63	25.47	3.21	81.64	61.89	94.27	27.15	15.74	0.4	0.63	0.64	0.09	0	0.08	0	0	0	0	0.65	1.71	0	0	0	0.09	0.26	0.08	0	0.09	1.05	0.07	0	0.2	0	0	0
ENSG00000089123|TASP1	8.44	8.87	14.94	6.96	10.48	20.85	13.15	12.82	11.27	9.75	9.52	15.4	6.98	11.15	14.76	8.48	7.15	10.76	9.59	12.17	14.5	6.93	6.87	11.79	11.47	8.85	13.17	7.95	9.02	11.37	9.57	8.03	12.19	10.96	8.23	13.25
ENSG00000089127|OAS1	0	0	0.4	0.2	0	0	0.92	0.19	0	0	0	0.48	0.22	0	0.1	0	0.16	0	0.21	0	0.1	0.11	0	0	0	0.11	0	0	0.11	0.09	0	0	0	0.28	0	0
ENSG00000089154|GCN1	59.25	57.49	31.45	65.78	35.59	28.91	38.31	22.89	33.05	34.91	28.74	51.9	49.13	33.66	40.32	49.73	21.05	38.28	40.47	42.41	44.1	73.21	33.59	30.7	35.77	52.84	68.55	75.84	45.75	33.53	57.75	47.31	58.66	43.95	38.62	69.48
ENSG00000089157|RPLP0	2557.33	2829.81	1320.26	2954.7	1119.72	1224.59	1297	1535.99	1885.2	2312.46	1607.79	1396.77	2176.09	1571.91	1400.78	1507.96	2413.02	1281.4	2359.12	1632.04	1355.84	1679.62	1582.28	1089.63	1629.54	1882.84	1349.47	1829.9	1605.44	1067.23	1528.73	1685.48	925.81	1634.91	1955.57	1277.68
ENSG00000089159|PXN	25.49	25.44	30.65	27.42	35.29	30.33	33.75	21.03	25.32	22.15	24.64	20.29	24.31	22.69	24.31	29.67	14.73	17.58	22.26	26.07	21.94	25.27	26.85	28.06	25.37	25.01	17.21	27.63	31.61	29.04	31.24	27.18	26.67	25.44	26.42	21.17
ENSG00000089163|SIRT4	5.21	5.48	6.29	2.44	5.4	9.08	9.38	8.38	12.61	3.84	5.24	6.95	3.29	5.57	5.88	5.75	14.97	10.33	2.72	5.45	8.97	2.27	4.64	9.35	5.17	3.88	4.54	2.78	3.05	8.14	3.55	2.88	5.21	4.98	2.12	6.2
ENSG00000089169|RPH3A	0.17	0.09	16.82	0.1	23.08	22.62	18.29	5.45	4.55	0	0.18	0.65	0.11	0.22	0	0	0	0	0	0.48	1.14	0	0.99	0	0	0	0.37	0.31	1.76	0.1	1.01	2.77	0.13	0	1.04	0.21
ENSG00000089177|KIF16B	7.5	8.58	4.61	7.06	3.39	5.94	7.2	7.85	4.11	7.44	7.69	6.54	9.72	11.37	8.15	11.8	5.48	15.99	6.69	9.88	12.52	8.02	6.95	25.28	8.84	11.22	16.49	8.29	3.85	18.11	2.6	4.69	17.82	7.28	4.7	21.55
ENSG00000089195|TRMT6	26.7	18.15	28.38	22.7	23.86	24.18	25.89	27.33	22.32	21.02	24.35	23.94	22.15	23.94	23.64	24.85	23.93	33.84	20.24	24.17	23.31	18.43	21.93	26.15	32	18.29	31.28	28.7	33.22	35.13	26.9	21.02	25.43	26.22	21.78	32.8
ENSG00000089199|CHGB	14.95	9.18	140.87	7.29	178.46	139.44	135.25	95.66	88.18	11.17	52.33	95.33	18.84	57.07	98.61	23.82	18.97	93.03	10.86	53.9	90.66	13.86	29.12	83.18	24.7	17.9	80.65	18.74	38.25	87.87	23.98	27.68	84.47	33.63	26.25	85.41
ENSG00000089220|PEBP1	297.88	232.87	436.47	275.65	331.55	411.99	321.69	358.93	274.36	300.99	372.08	434.66	283.73	382.08	435.83	197.43	328.65	362.99	280.59	357.02	452.34	279.59	279.71	403.27	212.82	234.71	383.49	267.7	298.03	386.56	240.12	277.26	383.37	223.81	225.77	374.49
ENSG00000089225|TBX5	0	0	0	0	0	0	0	0	0	0	0	0	0	0	0	0	0	0	0	0	0	0	0	0	0	0	0	0	0	0.59	0	0	0	0	0	0.11
[truncated: 31,988 more rows]
