# Supplementary material for: Integrated transcriptome and proteome analysis reveals posttranscriptional regulation of ribosomal genes in human brain organoids
Source: eLife. 2023 Mar 29;12:e85135. doi: 10.7554/eLife.85135 (PMC10059687; doi:10.7554/eLife.85135)
Supplement: Figure 1—source data 2. [file elife-85135-fig1-data2.xlsx]

## Sheet: Sheet1
ENSG_id	UniProt	gene_id	gene_symbol	Description	MW.in.kDa	pepNorm.gfp.day40.rep1	pepNorm.gfp.day40.rep2	pepNorm.gfp.day40.rep3	pepNorm.gfp.day60.rep1	pepNorm.gfp.day60.rep2	pepNorm.gfp.day60.rep3	pepNorm.gfp.day90.rep1	pepNorm.gfp.day90.rep2	pepNorm.gfp.day90.rep3	pepNorm.gfp.day120.rep1	pepNorm.gfp.day120.rep2	pepNorm.gfp.day120.rep3	pepNorm.tomato.day40.rep1	pepNorm.tomato.day40.rep2	pepNorm.tomato.day40.rep3	pepNorm.tomato.day60.rep1	pepNorm.tomato.day60.rep2	pepNorm.tomato.day60.rep3	pepNorm.tomato.day90.rep1	pepNorm.tomato.day90.rep2	pepNorm.tomato.day90.rep3	pepNorm.tomato.day120.rep1	pepNorm.tomato.day120.rep2	pepNorm.tomato.day120.rep3
dTomato	dTomato		dTomato	dTomato	26.9	226.795	200.916	254.278	249.123	241.272	435.934	271.495	308.411	433.844	304.924	291.05	400.039	908.007	874.127	1335.92	750.406	1338.56	1389.44	1134.13	1422.26	1373.52	973.283	777.078	1282.58
ENSG00000177144	A0A024RBG1	440672	NUDT4B	Diphosphoinositol polyphosphate phosphohydrolase NUDT4B OS=Homo sapiens (Human) OX=9606 GN=NUDT4B PE=3 SV=1 source=Uniprot,https://www.uniprot.org/uniprot/A0A024RBG1	20.4	37.628	10.274	14.1192	13.6039	15.7317	14.2749	22.7534	22.8337	18.1591	12.0656	18.3182	18.2178	13.9	12.5416	11.2313	14.7256	10.8086	11.1377	14.5387	18.8085	15.3157	48.784	18.4572	19.7651
ENSG00000280071	A0A0B4J2D5	102724023	GATD3B	Glutamine amidotransferase-like class 1 domain-containing protein 3B, mitochondrial OS=Homo sapiens (Human) OX=9606 GN=GATD3B PE=1 SV=1 source=Uniprot,https://www.uniprot.org/uniprot/A0A0B4J2D5	28.1	277.634	229.108	268.482	243.541	263.444	220.067	253.352	201.547	227.909	206.542	230.792	230.735	227.745	236.72	219.392	231.02	230.26	220.622	267.062	243.833	239.792	305.406	259.68	233.241
ENSG00000204272	A0A0U1RRE5	550643	NBDY	Negative regulator of P-body association OS=Homo sapiens (Human) OX=9606 GN=NBDY PE=1 SV=1 source=Uniprot,https://www.uniprot.org/uniprot/A0A0U1RRE5	7	82.5456	61.8628	70.4666	92.3494	73.6545	92.4672	78.8765	119.566	90.0299	90.7385	84.5924	84.5223	123.184	127.708	121.992	116.433	93.376	100.546	126.66	97.7692	97.7125	90.6857	92.0201	97.6279
ENSG00000224109	A0A0U1RRI6	347549	CENPVL3	Centromere protein V-like protein 3 OS=Homo sapiens (Human) OX=9606 GN=CENPVL3 PE=3 SV=1 source=Uniprot,https://www.uniprot.org/uniprot/A0A0U1RRI6	31.2	94.7669	58.2975	69.683	51.0524	81.6003	60.4611	70.2742	74.7856	64.2132	64.5784	53.4434	47.4843	61.8413	73.8746	40.5311	39.3639	66.472	54.3818	49.3421	59.9167	58.1971	43.7409	50.1047	35.7722
ENSG00000276076	A0A140G945	102724652	CRYAA2	Alpha-crystallin A2 chain OS=Homo sapiens (Human) OX=9606 GN=CRYAA2 PE=1 SV=1 source=Uniprot,https://www.uniprot.org/uniprot/A0A140G945	19.9	33.0176	41.859	53.2607	52.5953	44.3949	79.9126	47.0225	61.2801	138.146	38.9329	445.624	309.757	41.0043	47.3186	60.9384	43.2477	46.605	85.1795	31.5436	45.9171	73.9815	26.0222	52.542	66.1817
ENSG00000105948	A0AVF1	79989	TTC26	Intraflagellar transport protein 56 OS=Homo sapiens (Human) OX=9606 GN=TTC26 PE=2 SV=1 source=Uniprot,https://www.uniprot.org/uniprot/A0AVF1	64.1	19.4306	25.7609	37.8958	6.46409	15.9615	14.633	12.4124	8.82261	14.1785	12.9874	16.1112	17.2503	5.73174	12.5193	9.79807	6.47669	10.9398	9.75818	6.33191	8.44471	11.361	10.463	9.6089	7.17616
ENSG00000033178	A0AVT1	55236	UBA6	Ubiquitin-like modifier-activating enzyme 6 OS=Homo sapiens (Human) OX=9606 GN=UBA6 PE=1 SV=1 source=Uniprot,https://www.uniprot.org/uniprot/A0AVT1	117.9	177.52	208.435	192.413	207.095	216.623	179.138	211.252	227.01	211.113	217.075	232.927	206.805	207.789	217.345	197.919	257.132	255.363	216.1	263.159	258.156	252.481	261.905	256.507	251.023
ENSG00000117868	A0FGR8	57488	ESYT2	Extended synaptotagmin-2 OS=Homo sapiens (Human) OX=9606 GN=ESYT2 PE=1 SV=1 source=Uniprot,https://www.uniprot.org/uniprot/A0FGR8	102.3	56.1786	69.1044	61.3548	57.5121	54.8674	49.973	56.7137	51.3542	50.8741	51.6211	52.3759	53.6047	49.3405	44.3075	46.3214	43.1973	39.6815	42.9523	37.0759	45.6653	47.4336	44.9728	46.3421	46.2372
ENSG00000111647	A0JNW5	23074	UHRF1BP1L	UHRF1-binding protein 1-like OS=Homo sapiens (Human) OX=9606 GN=UHRF1BP1L PE=1 SV=2 source=Uniprot,https://www.uniprot.org/uniprot/A0JNW5	164.1	12.4607	12.9454	9.88946	13.043	12.0353	12.1498	12.1286	11.68	12.5104	12.0117	12.609	11.9794	15.0677	13.8227	14.9597	15.3166	11.6946	13.0001	12.318	13.1772	13.7506	12.7865	13.3752	14.4861
ENSG00000187164	A0MZ66	57698	SHTN1	Shootin-1 OS=Homo sapiens (Human) OX=9606 GN=SHTN1 PE=1 SV=4 source=Uniprot,https://www.uniprot.org/uniprot/A0MZ66	71.6	214.665	246.742	177.967	196.231	146.932	198.536	310.092	186.809	266.331	215.533	224.761	204.21	353.066	319.945	350.948	696.045	809.404	590.614	809.637	751.211	672.737	881.981	855.223	869.151
ENSG00000168569	A0PJW6	79064	TMEM223	Transmembrane protein 223 OS=Homo sapiens (Human) OX=9606 GN=TMEM223 PE=1 SV=1 source=Uniprot,https://www.uniprot.org/uniprot/A0PJW6	22	18.1536	19.734	18.0019	12.9026	17.6525	13.4964	12.2553	12.6555	13.0396	14.8071	11.3508	11.9443	9.9083	10.7179	12.72	17.0707	21.3495	16.2721	16.3862	16.619	16.2304	14.7923	12.2098	11.3898
ENSG00000152102	A1KXE4	130074	FAM168B	Myelin-associated neurite-outgrowth inhibitor OS=Homo sapiens (Human) OX=9606 GN=FAM168B PE=1 SV=1 source=Uniprot,https://www.uniprot.org/uniprot/A1KXE4	20.3	139.769	112.686	124.13	161.502	123.755	127.304	148.608	136.946	133.77	139.219	135.373	129.589	148.018	134.275	105.968	153.489	150.054	114.16	154.457	139.869	130.46	178.947	131.773	144.186
ENSG00000254726	A1L020	92312	MEX3A	RNA-binding protein MEX3A OS=Homo sapiens (Human) OX=9606 GN=MEX3A PE=1 SV=1 source=Uniprot,https://www.uniprot.org/uniprot/A1L020	54.1	70.9025	90.0246	75.1882	78.0187	81.5369	57.859	80.477	88.6288	81.0502	95.5146	90.2837	76.1055	108.774	112.581	94.2836	103.716	117.455	89.0852	117.494	139.086	138.338	126.457	120.794	117.896
ENSG00000105135	A1L0T0	10994	ILVBL	Acetolactate synthase-like protein OS=Homo sapiens (Human) OX=9606 GN=ILVBL PE=1 SV=2 source=Uniprot,https://www.uniprot.org/uniprot/A1L0T0	67.8	117.254	112.57	102.126	92.1599	102.315	114.514	109.807	88.0956	110.988	101.199	82.828	111.49	107.258	118.688	110.445	93.0822	87.0818	110.524	85.3427	85.0368	92.1795	94.8088	81.7012	100.221
ENSG00000126822	A1L390	26030	PLEKHG3	Pleckstrin homology domain-containing family G member 3 OS=Homo sapiens (Human) OX=9606 GN=PLEKHG3 PE=1 SV=1 source=Uniprot,https://www.uniprot.org/uniprot/A1L390	134.3	3.32809	4.6181	3.86138	2.26432	2.45486	2.17606	3.3134	2.88925	3.89231	3.60931	5.07006	3.94147	2.13543	1.70755	2.51834	2.29436	1.83237	1.70431	2.40082	2.40434	2.73092	3.00371	3.98223	2.77295
ENSG00000174705	A1X283	285590	SH3PXD2B	SH3 and PX domain-containing protein 2B OS=Homo sapiens (Human) OX=9606 GN=SH3PXD2B PE=1 SV=3 source=Uniprot,https://www.uniprot.org/uniprot/A1X283	101.5	142.434	160.502	134.996	144.774	147.896	127.725	152.06	138.119	140.654	153.012	146.033	132.814	108.358	96.5747	102.353	101.796	104.947	97.9492	97.4599	95.5811	104.129	116.175	106.542	104.963
ENSG00000172264	A1Z1Q3	140733	MACROD2	ADP-ribose glycohydrolase MACROD2 OS=Homo sapiens (Human) OX=9606 GN=MACROD2 PE=1 SV=2 source=Uniprot,https://www.uniprot.org/uniprot/A1Z1Q3	47.4	39.3182	77.2824	58.8171	40.1359	47.6455	30.9103	33.1464	39.4557	38.5622	26.1154	29.2514	33.2853	74.531	79.2752	53.3201	81.6696	83.0882	44.0769	77.9549	74.6972	60.2713	44.3274	41.1167	39.7258
ENSG00000173681	A2AJT9	256643	BCLAF3	BCLAF1 and THRAP3 family member 3 OS=Homo sapiens (Human) OX=9606 GN=BCLAF3 PE=1 SV=1 source=Uniprot,https://www.uniprot.org/uniprot/A2AJT9	83.8	17.8602	21.332	20.2246	24.9521	25.644	25.1084	23.5551	29.6094	25.8511	26.1496	29.4157	24.2921	32.5545	31.2207	25.1657	30.5688	31.204	26.3429	30.2631	29.9858	31.2969	20.9675	30.8158	29.7634
ENSG00000162669	A2PYH4	164045	HFM1			9.92347	10.2157	11.3025	9.6249	9.7895	7.40378	16.8031	8.71517	12.1742	15.985	23.2471	14.8861	3.4579	3.52913	2.76208	3.73458	3.7108	2.13899	2.2854	4.53478	3.02847	3.62008	5.26262	2.95356
ENSG00000151779	A2RRP1	51594	NBAS	Neuroblastoma-amplified sequence OS=Homo sapiens (Human) OX=9606 GN=NBAS PE=1 SV=2 source=Uniprot,https://www.uniprot.org/uniprot/A2RRP1	268.4	79.5852	79.7502	79.4792	80.1131	87.7013	69.0539	77.8716	72.9362	68.3964	72.039	71.4543	67.7168	69.0343	64.2637	60.6401	68.6727	74.1708	60.5439	64.8325	68.7507	64.9962	65.1577	64.996	58.455
ENSG00000185418	A2RTX5	123283	TARS3	Threonine--tRNA ligase 2, cytoplasmic OS=Homo sapiens (Human) OX=9606 GN=TARSL2 PE=1 SV=1 source=Uniprot,https://www.uniprot.org/uniprot/A2RTX5	92.6	16.7223	21.5071	19.0099	14.4902	17.5488	13.0447	18.9744	18.2977	16.6159	17.8145	18.9876	16.7705	14.725	13.8017	12.6329	13.3764	17.8732	13.0461	14.6765	16.8676	17.7438	17.5967	16.5221	14.6289
ENSG00000162971	A2RUC4	129450	TYW5	tRNA wybutosine-synthesizing protein 5 OS=Homo sapiens (Human) OX=9606 GN=TYW5 PE=1 SV=1 source=Uniprot,https://www.uniprot.org/uniprot/A2RUC4	36.5	21.4254	23.9685	18.1721	20.0013	23.3096	22.1718	21.2448	22.2269	24.0159	21.0625	20.3862	24.9738	17.1536	17.8445	22.0617	20.4377	21.3538	24.4914	22.7187	22.5335	25.5388	22.5382	19.0159	21.9951
ENSG00000121210	A2VDJ0	23240	TMEM131L	Transmembrane protein 131-like OS=Homo sapiens (Human) OX=9606 GN=TMEM131L PE=1 SV=2 source=Uniprot,https://www.uniprot.org/uniprot/A2VDJ0	179.2	1.12073	0.914633	1.20578	0.954306	1.06764	1.55371	1.05083	0.973501	1.27183	1.05701	1.14763	1.1915	0.897013	0.741258	0.754229	0.873076	0.761896	0.621169	0.820061	0.685371	0.582661	0.996032	0.951578	0.702452
ENSG00000102763	A3KMH1	23078	VWA8	von Willebrand factor A domain-containing protein 8 OS=Homo sapiens (Human) OX=9606 GN=VWA8 PE=1 SV=2 source=Uniprot,https://www.uniprot.org/uniprot/A3KMH1	214.7	11.4402	13.647	14.2691	13.0173	14.7528	15.6686	11.1472	10.8328	13.0601	10.9109	12.3575	14.1325	10.5855	10.0453	13.9856	14.1092	14.6388	14.516	13.3488	11.9958	12.8714	11.6882	12.0494	12.4047
ENSG00000139697	A3KN83	55206	SBNO1	Protein strawberry notch homolog 1 OS=Homo sapiens (Human) OX=9606 GN=SBNO1 PE=1 SV=1 source=Uniprot,https://www.uniprot.org/uniprot/A3KN83	154.2	21.5747	19.9675	19.4602	20.6825	20.3062	17.6807	20.7936	17.911	19.716	19.5152	17.7368	21.0777	21.6476	19.4902	21.8366	23.0834	19.1372	18.6264	21.3402	21.9376	20.984	21.9743	18.0839	20.6369
ENSG00000105793	A4D1E9	85865	GTPBP10	GTP-binding protein 10 OS=Homo sapiens (Human) OX=9606 GN=GTPBP10 PE=1 SV=1 source=Uniprot,https://www.uniprot.org/uniprot/A4D1E9	42.9	40.1952	37.979	47.3799	37.3347	36.2887	41.0401	35.3094	25.4114	37.4721	34.2758	39.2271	41.8048	32.8818	36.46	45.2014	45.7627	44.9688	41.9952	38.6547	36.5869	42.3253	37.2301	36.3149	35.8781
ENSG00000105875	A4D1P6	29062	WDR91	WD repeat-containing protein 91 OS=Homo sapiens (Human) OX=9606 GN=WDR91 PE=1 SV=2 source=Uniprot,https://www.uniprot.org/uniprot/A4D1P6	83.3	44.8113	50.6272	43.3316	42.3825	47.269	36.1768	45.0101	48.6541	43.7868	48.1645	46.3218	46.6285	44.0202	43.6929	40.2513	46.8362	47.7988	43.9822	54.7444	49.2511	51.4628	66.752	53.0337	51.6004
ENSG00000257093	A4D1U4	57189	DENND11	DENN domain-containing protein 11 OS=Homo sapiens (Human) OX=9606 GN=DENND11 PE=1 SV=1 source=Uniprot,https://www.uniprot.org/uniprot/A4D1U4	51.4	72.67	66.0094	61.4179	46.3154	61.856	48.1626	112.911	42.6121	51.0011	44.1758	39.6287	50.7553	32.9763	29.3989	42.2733	43.5793	42.2392	45.4439	37.8502	44.1249	43.3985	43.541	30.5485	33.3418
ENSG00000214309	A4D2B0	255374	MBLAC1	Metallo-beta-lactamase domain-containing protein 1 OS=Homo sapiens (Human) OX=9606 GN=MBLAC1 PE=1 SV=1 source=Uniprot,https://www.uniprot.org/uniprot/A4D2B0	27.2	6.16545	7.54966	7.40222	7.43035	6.48173	5.35143	6.93574	5.36688	7.16553	6.74144	7.029	7.3079	7.97862	6.64832	7.23796	8.1194	8.58235	9.64504	10.0828	11.7647	11.8564	9.74734	8.27329	10.749
ENSG00000113597	A5PLN9	80006	TRAPPC13	Trafficking protein particle complex subunit 13 OS=Homo sapiens (Human) OX=9606 GN=TRAPPC13 PE=1 SV=2 source=Uniprot,https://www.uniprot.org/uniprot/A5PLN9	46.5	30.8918	24.1778	35.4294	38.125	28.2358	27.0166	33.9984	36.2277	33.7926	34.5009	34.0647	34.1016	37.1632	36.732	33.6031	44.3365	35.3183	34.248	40.8358	27.249	38.8654	32.8518	31.9814	34.8428
ENSG00000125107	A5YKK6	23019	CNOT1	CCR4-NOT transcription complex subunit 1 OS=Homo sapiens (Human) OX=9606 GN=CNOT1 PE=1 SV=2 source=Uniprot,https://www.uniprot.org/uniprot/A5YKK6	266.8	142.113	143.148	139.713	125.109	131.114	123.192	135.441	128.749	129.567	130.777	127.548	126.863	127.729	134.137	134.123	127.349	132.555	119.718	137.915	139.136	135.169	164.26	139.748	141.56
ENSG00000184207	A6NDG6	283871	PGP	Glycerol-3-phosphate phosphatase OS=Homo sapiens (Human) OX=9606 GN=PGP PE=1 SV=1 source=Uniprot,https://www.uniprot.org/uniprot/A6NDG6	34	130.521	115.831	107.653	89.5412	95.8664	91.4409	108.566	75.7861	87.5362	86.5947	77.6983	85.7988	83.1083	96.9647	91.6409	71.5939	81.403	72.0565	69.9932	76.584	77.1898	89.8731	72.0837	74.7475
ENSG00000205765	A6NDU8	285636	C5orf51	UPF0600 protein C5orf51 OS=Homo sapiens (Human) OX=9606 GN=C5orf51 PE=1 SV=1 source=Uniprot,https://www.uniprot.org/uniprot/A6NDU8	33.6	96.1988	107.226	113.954	77.9439	106.905	101.245	87.2975	101.474	106.676	107.862	104.548	109.407	70.2949	91.9842	101.725	86.1621	89.0669	96.5163	78.142	86.2108	93.1726	85.4663	89.7195	94.4307
ENSG00000204347	A6NE02	388419	BTBD17	BTB/POZ domain-containing protein 17 OS=Homo sapiens (Human) OX=9606 GN=BTBD17 PE=3 SV=1 source=Uniprot,https://www.uniprot.org/uniprot/A6NE02	52.4	36.049	68.7394	55.4062	35.8039	34.7214	39.6922	26.1585	25.9977	25.6799	25.8723	25.938	27.345	30.2926	24.3453	32.7746	27.0147	20.1357	23.4596	22.6258	19.8204	22.0714	19.8138	22.8052	29.1517
ENSG00000166965	A6NED2	91433	RCCD1	RCC1 domain-containing protein 1 OS=Homo sapiens (Human) OX=9606 GN=RCCD1 PE=1 SV=1 source=Uniprot,https://www.uniprot.org/uniprot/A6NED2	40.1	21.6075	17.8383	12.6978	13.0462	20.438	20.4054	17.5502	19.7897	17.5795	16.4273	15.0846	18.3386	13.4003	11.9583	14.5698	10.5214	10.2148	13.3369	11.793	13.1206	14.6819	15.5276	14.3205	16.3579
ENSG00000205903	A6NFI3	100131017	ZNF316	Zinc finger protein 316 OS=Homo sapiens (Human) OX=9606 GN=ZNF316 PE=1 SV=1 source=Uniprot,https://www.uniprot.org/uniprot/A6NFI3	108.4	66.0185	69.3404	67.3479	72.1693	70.6647	60.8332	73.9335	73.2767	67.0401	77.8865	87.4574	83.8574	88.1231	101.872	88.2462	68.0021	76.8932	66.9911	73.661	76.952	83.6263	91.9209	89.5997	91.4201
ENSG00000122574	A6NGB9	644150	WIPF3	WAS/WASL-interacting protein family member 3 OS=Homo sapiens (Human) OX=9606 GN=WIPF3 PE=1 SV=4 source=Uniprot,https://www.uniprot.org/uniprot/A6NGB9	49.4	7.04166	3.63804	3.54914	12.0939	14.3753	10.9031	11.2716	9.60706	12.3569	16.7906	7.03029	10.9325	8.08512	3.98337	5.05274	6.56321	9.94317	10.4246	15.2767	12.1759	14.716	17.4628	12.2612	14.9971
ENSG00000178462	A6NHL2	79861	TUBAL3	Tubulin alpha chain-like 3 OS=Homo sapiens (Human) OX=9606 GN=TUBAL3 PE=1 SV=2 source=Uniprot,https://www.uniprot.org/uniprot/A6NHL2	49.9	72.1607	75.9642	70.8234	20.7875	51.0438	33.8161	41.3268	44.8683	32.1696	29.6184	34.2394	32.4202	33.8284	34.7547	41.2412	18.4309	50.2295	43.8732	34.5151	49.1645	49.9144	184.238	35.8042	36.2532
ENSG00000188573	A6NHQ2	345630	FBLL1	rRNA/tRNA 2'-O-methyltransferase fibrillarin-like protein 1 OS=Homo sapiens (Human) OX=9606 GN=FBLL1 PE=3 SV=2 source=Uniprot,https://www.uniprot.org/uniprot/A6NHQ2	34.8	149.93	148.515	105.681	85.0247	164.903	82.5161	114.527	96.3931	88.1031	92.2786	104.545	82.0118	159.499	139.008	164.769	119.064	152.521	173.043	158.177	170.909	164.016	245.694	139.656	169.714
ENSG00000101596	A6NHR9	23347	SMCHD1	Structural maintenance of chromosomes flexible hinge domain-containing protein 1 OS=Homo sapiens (Human) OX=9606 GN=SMCHD1 PE=1 SV=2 source=Uniprot,https://www.uniprot.org/uniprot/A6NHR9	226.2	194.288	192.125	209.68	196.417	213.478	181.848	189.844	198.757	189.486	203.022	190.218	189.733	170.233	176.478	171.081	173.656	170.773	151.986	162.899	166.177	164.006	162.611	156.719	165.022
ENSG00000274070	A6NHX0	729438	CASTOR2	Cytosolic arginine sensor for mTORC1 subunit 2 OS=Homo sapiens (Human) OX=9606 GN=CASTOR2 PE=1 SV=3 source=Uniprot,https://www.uniprot.org/uniprot/A6NHX0	36	50.2074	44.1903	52.048	52.1764	47.7424	57.3911	54.2875	53.9403	59.3695	65.2408	62.1395	60.5214	84.9963	87.67	84.338	71.7912	66.2468	61.012	77.1566	60.8778	68.3338	77.3301	64.2228	76.0479
ENSG00000175970	A6NIH7	84747	UNC119B	Protein unc-119 homolog B OS=Homo sapiens (Human) OX=9606 GN=UNC119B PE=1 SV=1 source=Uniprot,https://www.uniprot.org/uniprot/A6NIH7	28.1	223.184	252.228	169.761	192.043	197.86	170.823	198.602	174.33	197.489	194.833	175.245	200.722	116.167	97.5097	143.07	104.51	105.918	133.432	108.954	115.145	113.848	124.991	114.148	123.811
ENSG00000248485	A6NKN8	654790	PCP4L1	Purkinje cell protein 4-like protein 1 OS=Homo sapiens (Human) OX=9606 GN=PCP4L1 PE=3 SV=3 source=Uniprot,https://www.uniprot.org/uniprot/A6NKN8	7.5	14.5798	7.02766	7.20933	6.41242	4.57438	7.6702	11.5151	8.00444	8.49552	10.0666	8.56403	12.183	92.141	168.625	113.489	24.8856	10.9581	14.5673	11.3721	11.5721	12.0084	16.3852	27.5663	44.2192
ENSG00000153165	A6NKT7	653489	RGPD3	RanBP2-like and GRIP domain-containing protein 3 OS=Homo sapiens (Human) OX=9606 GN=RGPD3 PE=3 SV=2 source=Uniprot,https://www.uniprot.org/uniprot/A6NKT7	197.4	7.41417	6.62847	6.79531	7.33051	6.97324	7.7533	6.85036	6.29683	6.27429	6.09019	6.69757	5.98368	6.92272	6.40253	5.96935	6.14277	5.68604	5.70398	6.15788	6.0603	6.14111	5.73862	6.03121	5.61014
ENSG00000214655	A7E2V4	23053	ZSWIM8	Zinc finger SWIM domain-containing protein 8 OS=Homo sapiens (Human) OX=9606 GN=ZSWIM8 PE=1 SV=1 source=Uniprot,https://www.uniprot.org/uniprot/A7E2V4	197.2	4.4595	3.71102	4.42214	3.97114	4.38733	3.13952	4.57071	4.5043	3.82491	5.26323	4.66042	4.00202	4.19158	4.94402	3.69748	4.51971	4.89535	3.17566	4.18689	4.55026	3.95256	5.06402	4.48892	3.45835
ENSG00000134909	A7KAX9	9743	ARHGAP32	Rho GTPase-activating protein 32 OS=Homo sapiens (Human) OX=9606 GN=ARHGAP32 PE=1 SV=1 source=Uniprot,https://www.uniprot.org/uniprot/A7KAX9	230.4	9.61732	8.17535	10.6254	9.348	8.63072	6.4866	10.3278	10.0403	10.199	10.0505	10.6541	8.96535	12.5516	11.7995	9.92845	12.4676	13.1013	11.1574	14.0299	12.0383	15.8337	12.2361	11.3428	10.3979
ENSG00000112320	A7XYQ1	55084	SOBP	Sine oculis-binding protein homolog OS=Homo sapiens (Human) OX=9606 GN=SOBP PE=1 SV=2 source=Uniprot,https://www.uniprot.org/uniprot/A7XYQ1	92.6	11.0107	7.83557	12.3098	15.8433	11.8957	19.3197	14.0827	16.7266	16.3533	16.7975	16.5914	16.3515	18.0082	16.4689	13.8274	17.345	12.2907	15.9897	23.3103	15.893	19.0548	11.7929	16.633	15.5973
ENSG00000232859	A8MSI8	201229	LYRM9	LYR motif-containing protein 9 OS=Homo sapiens (Human) OX=9606 GN=LYRM9 PE=3 SV=2 source=Uniprot,https://www.uniprot.org/uniprot/A8MSI8	9.4	36.2523	67.2109	38.2411	46.9342	63.6945	41.5097	41.6401	38.7599	41.8681	45.3423	50.8002	41.2595	56.7589	37.6965	45.0655	49.9374	58.4946	47.5117	54.3188	84.9933	48.7078	44.1179	56.8671	44.1887
ENSG00000161682	A8MVW0	284069	FAM171A2	Protein FAM171A2 OS=Homo sapiens (Human) OX=9606 GN=FAM171A2 PE=1 SV=1 source=Uniprot,https://www.uniprot.org/uniprot/A8MVW0	87.4	15.3638	19.5354	16.4908	17.8163	16.2625	17.8747	17.3909	14.8911	16.5697	15.1509	15.7983	17.776	17.6305	15.3272	15.9154	21.5743	15.3597	16.7921	15.0127	16.4121	16.2166	13.0934	15.3302	16.8245
ENSG00000129292	A8MW92	51105	PHF20L1	PHD finger protein 20-like protein 1 OS=Homo sapiens (Human) OX=9606 GN=PHF20L1 PE=1 SV=2 source=Uniprot,https://www.uniprot.org/uniprot/A8MW92	114.9	55.0818	49.4878	48.6333	67.312	58.1963	64.9382	67.9093	70.3453	75.4174	68.8191	73.0659	62.8248	83.2272	78.5163	83.5327	147.025	124.038	120	173.682	186.942	185.155	194.19	167.945	167.671
ENSG00000164659	A8MWY0	222223	ELAPOR2	UPF0577 protein KIAA1324-like OS=Homo sapiens (Human) OX=9606 GN=KIAA1324L PE=1 SV=2 source=Uniprot,https://www.uniprot.org/uniprot/A8MWY0	113.8	6.09826	7.01754	5.49317	6.48746	7.31586	8.06828	5.6296	5.92424	6.57267	5.49439	6.04883	7.2778	16.9369	15.1046	17.4269	10.5034	10.6184	10.8179	7.40368	7.09305	7.30794	5.19708	6.34281	7.08804
ENSG00000213965	A8MXV4	390916	NUDT19	Nucleoside diphosphate-linked moiety X motif 19 OS=Homo sapiens (Human) OX=9606 GN=NUDT19 PE=1 SV=1 source=Uniprot,https://www.uniprot.org/uniprot/A8MXV4	42.2	55.0544	42.5292	51.0112	49.9436	57.8342	38.5648	60.7679	50.3582	54.1669	53.2088	55.9451	55.4906	34.7307	46.6226	30.7373	36.7138	48.7779	42.1066	46.9523	60.4526	59.834	56.6332	60.3254	44.2129
ENSG00000125457	A9UHW6	57409	MIF4GD	MIF4G domain-containing protein OS=Homo sapiens (Human) OX=9606 GN=MIF4GD PE=1 SV=1 source=Uniprot,https://www.uniprot.org/uniprot/A9UHW6	25.4	59.3135	62.4849	66.1674	61.3337	70.9547	44.4966	59.9982	62.3532	56.9438	62.6408	51.0245	50.9215	48.872	47.1828	39.3063	47.3369	49.8317	41.3528	44.2635	56.26	55.0644	54.4145	52.9486	51.0253
ENSG00000230062	B4E2M5	100287718	ANKRD66			53.5932	31.2183	19.0638	36.6915	44.7851	57.6752	58.8738	94.8601	77.0437	90.2141	63.3776	56.7268	62.918	53.2471	43.0987	50.668	80.542	142.863	43.5332	62.5123	79.6225	33.97	71.8326	60.048
ENSG00000117262	B7ZAQ6	653519	GPR89A	Golgi pH regulator A OS=Homo sapiens (Human) OX=9606 GN=GPR89A PE=1 SV=2 source=Uniprot,https://www.uniprot.org/uniprot/B7ZAQ6	52.9	51.4777	53.0713	48.5119	20.6093	48.6532	18.6781	43.7558	22.1637	22.1869	35.9992	21.9467	20.2576	28.034	17.6856	16.4679	19.3792	42.0104	22.3509	27.4559	42.0962	30.6348	54.6063	22.4788	20.1875
ENSG00000284691	B7ZLF3		AC073111.4	Uncharacterized protein OS=Homo sapiens (Human) OX=9606 GN=LOC402624 PE=1 SV=1 source=Uniprot,https://www.uniprot.org/uniprot/B7ZLF3	22.4	3.25286	4.27751	2.97741	8.76619	4.15421	8.21657	5.45034	7.92155	7.49582	8.58041	12.5126	7.58328	9.00578	16.0649	8.22195	11.2088	7.38626	9.06181	12.3388	8.60786	7.24463	6.73071	12.8348	9.78158
ENSG00000188070	C9JLR9	65998	C11orf95	Uncharacterized protein C11orf95 OS=Homo sapiens (Human) OX=9606 GN=C11orf95 PE=1 SV=1 source=Uniprot,https://www.uniprot.org/uniprot/C9JLR9	73.2	28.2	26.7714	20.1665	29.1217	27.077	28.2047	30.0128	28.252	26.4714	26.5509	28.1254	27.3924	33.3783	32.6131	34.1955	34.7845	28.5113	30.8922	32.2414	36.7418	34.6315	37.1994	31.7051	33.9891
ENSG00000225663	C9JLW8	348262	MCRIP1	Mapk-regulated corepressor-interacting protein 1 OS=Homo sapiens (Human) OX=9606 GN=MCRIP1 PE=1 SV=1 source=Uniprot,https://www.uniprot.org/uniprot/C9JLW8	10.9	161.071	165.887	224.036	204.047	167.717	149.336	183.984	205.959	206.147	208.966	181.188	184.885	184.126	212.591	161.053	221.184	213.019	182.382	247.12	207.026	218.979	178.628	203.824	189.055
EGFP	EGFP		EGFP	GFP-Tag GFP-Tag, Enhanced Green Fluorescent Protein, pEGFP	29.9	366.925	417.628	375.864	615.55	504.018	532.257	454.895	452.844	522.23	571.142	584.489	620.94	135.051	138.07	172.127	137.478	132.911	194.457	121.284	135.584	155.363	129.945	152.486	163.709
ENSG00000196531	E9PAV3	4666	NACA	Nascent polypeptide-associated complex subunit alpha, muscle-specific form OS=Homo sapiens (Human) OX=9606 GN=NACA PE=1 SV=1 source=Uniprot,https://www.uniprot.org/uniprot/E9PAV3	205.3	46.2105	54.3063	51.9875	57.621	46.8992	49.797	48.1255	46.657	46.2679	46.009	46.539	45.4597	51.1446	49.5479	50.6981	55.9079	49.9429	47.3248	51.178	48.9232	47.4672	43.3874	42.1538	42.4835
ENSG00000278615	E9PRG8	102288414	C11orf98	Uncharacterized protein C11orf98 OS=Homo sapiens (Human) OX=9606 GN=C11orf98 PE=4 SV=2 source=Uniprot,https://www.uniprot.org/uniprot/E9PRG8	14.2	355.973	433.861	415.034	439.391	449.747	406.998	403.416	429.284	406.986	395.304	387.651	399.573	412.138	351.731	366.019	361.672	376.995	353.955	362.745	432.251	396.203	345.053	359.453	383.841
ENSG00000286053	L0R819		ASDURF	ASNSD1 upstream open reading frame protein OS=Homo sapiens (Human) OX=9606 GN=ASDURF PE=1 SV=1 source=Uniprot,https://www.uniprot.org/uniprot/L0R819	11.2	237.331	303.085	337.226	234.865	225.658	186.345	241.13	198.483	206.653	242.244	226.877	206.126	200.38	172.371	159.839	210.5	200.914	158.056	218.224	222.655	211.267	186.19	179.744	152.544
ENSG00000105612	O00115	1777	DNASE2	Deoxyribonuclease-2-alpha OS=Homo sapiens (Human) OX=9606 GN=DNASE2 PE=1 SV=2 source=Uniprot,https://www.uniprot.org/uniprot/O00115	39.6	40.6292	49.4251	40.1366	52.4944	57.0253	54.7162	52.0087	43.7672	53.29	51.306	39.9321	44.2304	21.8046	23.5339	36.4052	53.1928	53.4122	55.6014	58.2251	59.344	57.9047	80.8611	52.7782	54.5445
ENSG00000018510	O00116	8540	AGPS	Alkyldihydroxyacetonephosphate synthase, peroxisomal OS=Homo sapiens (Human) OX=9606 GN=AGPS PE=1 SV=1 source=Uniprot,https://www.uniprot.org/uniprot/O00116	72.9	132.022	138.978	152.181	109.535	114.862	104.351	103.298	93.4055	100.124	102.507	107.805	102.056	117.857	104.208	105.222	107.249	109.297	93.8446	95.5046	96.1422	94.404	85.4054	89.3137	78.8355
ENSG00000068796	O00139	3796	KIF2A	Kinesin-like protein KIF2A OS=Homo sapiens (Human) OX=9606 GN=KIF2A PE=1 SV=3 source=Uniprot,https://www.uniprot.org/uniprot/O00139	79.9	247.666	223.382	244.347	217.627	217.797	215.291	242.867	204.655	230.788	244.795	261.917	228.263	233.531	258.213	250.001	266.011	308.102	273.915	320.721	306.815	300.507	310.449	266.869	261.214
ENSG00000166548	O00142	7084	TK2	Thymidine kinase 2, mitochondrial OS=Homo sapiens (Human) OX=9606 GN=TK2 PE=1 SV=4 source=Uniprot,https://www.uniprot.org/uniprot/O00142	31	20.6329	22.5431	23.2772	23.0066	27.529	23.7609	25.8804	28.2003	27.6707	31.2471	30.5497	28.7128	23.7854	23.6492	28.7804	31.2238	41.0169	27.2843	36.4782	37.8811	33.0284	29.7817	34.3575	26.2957
ENSG00000123136	O00148	10212	DDX39A	ATP-dependent RNA helicase DDX39A OS=Homo sapiens (Human) OX=9606 GN=DDX39A PE=1 SV=2 source=Uniprot,https://www.uniprot.org/uniprot/O00148	49.1	139.04	118.87	159.541	161.609	139.55	187.11	165.5	139.758	176.599	180.221	207.282	195.754	140.383	112.547	148.47	160.049	139.788	162.801	160.776	144.302	164.19	152.144	139.522	146.451
ENSG00000107438	O00151	9124	PDLIM1	PDZ and LIM domain protein 1 OS=Homo sapiens (Human) OX=9606 GN=PDLIM1 PE=1 SV=4 source=Uniprot,https://www.uniprot.org/uniprot/O00151	36	39.2853	30.8723	35.4853	30.5415	35.6123	34.1337	36.6932	29.4215	32.4831	34.5961	34.3682	34.3672	25.3431	12.4984	16.4828	22.5388	17.1768	19.76	17.9494	19.6553	18.3547	19.9755	15.2759	18.6094
ENSG00000097021	O00154	11332	ACOT7	Cytosolic acyl coenzyme A thioester hydrolase OS=Homo sapiens (Human) OX=9606 GN=ACOT7 PE=1 SV=3 source=Uniprot,https://www.uniprot.org/uniprot/O00154	41.8	420.997	486.097	462.846	501.331	423.734	469.218	482.372	458.996	513.347	486.868	505.822	452.129	880.78	944.914	956.547	903.799	745.804	732.899	896.201	781.774	811.476	780.864	753.365	769.567
ENSG00000197879	O00159	4641	MYO1C	Unconventional myosin-Ic OS=Homo sapiens (Human) OX=9606 GN=MYO1C PE=1 SV=4 source=Uniprot,https://www.uniprot.org/uniprot/O00159	121.6	21.8317	18.8002	20.0831	18.6858	18.734	16.8076	23.7908	15.1803	19.2002	19.3342	24.0957	20.5493	13.2823	11.8823	11.4998	12.1134	14.7425	11.7546	14.6647	15.7348	14.6627	20.7139	31.6979	17.6614
ENSG00000092531	O00161	8773	SNAP23	Synaptosomal-associated protein 23 OS=Homo sapiens (Human) OX=9606 GN=SNAP23 PE=1 SV=1 source=Uniprot,https://www.uniprot.org/uniprot/O00161	23.3	14.4938	7.65414	26.8633	22.4927	9.81681	19.9111	19.0074	19.4126	23.3254	19.5669	19.9988	21.1101	13.7893	9.7365	8.48025	14.5022	8.57759	13.042	10.4577	8.90771	7.53001	9.17127	15.5777	11.8573
ENSG00000143575	O00165	10456	HAX1	HCLS1-associated protein X-1 OS=Homo sapiens (Human) OX=9606 GN=HAX1 PE=1 SV=2 source=Uniprot,https://www.uniprot.org/uniprot/O00165	31.6	98.738	117.528	100.301	63.4166	104.282	64.0637	86.9645	58.9344	72.1505	78.2569	66.7181	74.1589	64.4287	62.5431	63.2833	66.3664	104.905	73.3903	75.5913	129.655	91.6554	140.023	76.1308	74.8117
ENSG00000110711	O00170	9049	AIP	AH receptor-interacting protein OS=Homo sapiens (Human) OX=9606 GN=AIP PE=1 SV=2 source=Uniprot,https://www.uniprot.org/uniprot/O00170	37.6	182.073	235.018	227.94	273.39	253.973	219.654	232.176	244.574	246.379	279.627	245.047	252.568	291.184	267.957	240.933	306.863	267.447	265.85	292.723	277.991	284.496	207.632	244.694	254.611
ENSG00000100226	O00178	9567	GTPBP1	GTP-binding protein 1 OS=Homo sapiens (Human) OX=9606 GN=GTPBP1 PE=1 SV=3 source=Uniprot,https://www.uniprot.org/uniprot/O00178	72.4	214.654	215.915	213.414	187.505	207.44	179.307	235.275	192.419	192.684	223.275	233.896	202.704	216.858	182.332	188.598	180.176	192.006	189.696	209.796	203.484	195.543	223.615	186.477	195.773
ENSG00000116266	O00186	6814	STXBP3	Syntaxin-binding protein 3 OS=Homo sapiens (Human) OX=9606 GN=STXBP3 PE=1 SV=2 source=Uniprot,https://www.uniprot.org/uniprot/O00186	67.7	80.7454	80.6774	71.5004	68.3133	72.2314	63.929	76.4571	65.5741	67.1921	63.009	66.4318	75.4532	40.6794	38.9463	40.3829	39.5922	38.1158	36.9831	40.1788	35.1066	42.3319	49.6318	48.6893	43.9419
ENSG00000099889	O00192	421	ARVCF	Armadillo repeat protein deleted in velo-cardio-facial syndrome OS=Homo sapiens (Human) OX=9606 GN=ARVCF PE=1 SV=1 source=Uniprot,https://www.uniprot.org/uniprot/O00192	104.6	48.7749	48.7832	52.77	59.4733	43.6277	40.2621	53.2696	41.476	46.168	43.5775	48.2302	45.002	36.5602	37.3918	35.0795	28.1926	31.3427	34.2486	30.5196	29.2983	37.4479	30.3951	37.2941	35.7154
ENSG00000110696	O00193	10944	C11orf58	Small acidic protein OS=Homo sapiens (Human) OX=9606 GN=SMAP PE=1 SV=1 source=Uniprot,https://www.uniprot.org/uniprot/O00193	20.3	851.772	1033.18	1123.07	1549.07	1150.21	1422.34	1190.78	1413.37	1348.02	1219.97	1486.93	1409.08	1440.69	1423.57	1439.82	1554.89	1048.23	1208.31	1241.85	1192.86	1273.71	1002.27	1335.28	1418.09
ENSG00000132842	O00203	8546	AP3B1	AP-3 complex subunit beta-1 OS=Homo sapiens (Human) OX=9606 GN=AP3B1 PE=1 SV=3 source=Uniprot,https://www.uniprot.org/uniprot/O00203	121.2	84.6687	110.147	96.5752	71.0935	78.4093	60.9485	80.0377	69.4904	74.5278	77.5985	78.1991	79.2287	44.6607	41.2887	43.7714	47.1906	42.9028	41.7584	41.0728	45.268	50.5996	54.1288	55.4109	45.2223
ENSG00000166313	O00213	322	APBB1	Amyloid-beta A4 precursor protein-binding family B member 1 OS=Homo sapiens (Human) OX=9606 GN=APBB1 PE=1 SV=2 source=Uniprot,https://www.uniprot.org/uniprot/O00213	77.2	25.5336	33.8067	23.5622	17.0985	37.979	21.5992	24.4579	23.2324	24.9824	30.9757	24.5435	22.215	33.5184	28.5063	28.0182	19.3804	39.6546	31.0303	23.8102	31.1611	30.5102	21.2813	23.6191	27.3686
ENSG00000110717	O00217	4728	NDUFS8	NADH dehydrogenase [ubiquinone] iron-sulfur protein 8, mitochondrial OS=Homo sapiens (Human) OX=9606 GN=NDUFS8 PE=1 SV=1 source=Uniprot,https://www.uniprot.org/uniprot/O00217	23.7	153.479	161.292	163.755	130.569	198.898	134.106	143.219	89.7465	125.281	110.816	104.613	120.972	181.998	152.105	155.536	184.394	284.518	181.4	214.718	226.512	181.123	233.881	147.167	141.026
ENSG00000108671	O00231	5717	PSMD11	26S proteasome non-ATPase regulatory subunit 11 OS=Homo sapiens (Human) OX=9606 GN=PSMD11 PE=1 SV=3 source=Uniprot,https://www.uniprot.org/uniprot/O00231	47.4	375.619	465.18	406.716	418.296	415.227	365.626	386.408	409.746	389.007	386.401	381.605	387.967	433.58	455.404	436.986	464.99	444.402	418.623	449.496	445.776	428.07	450.381	407.418	424.521
ENSG00000197170	O00232	5718	PSMD12	26S proteasome non-ATPase regulatory subunit 12 OS=Homo sapiens (Human) OX=9606 GN=PSMD12 PE=1 SV=3 source=Uniprot,https://www.uniprot.org/uniprot/O00232	52.9	439.313	509.865	483.15	545.892	519.927	517.461	479.578	538.419	529.295	537.043	534.81	549.826	561.951	710.715	689.578	661.943	578.255	566.828	596.337	549.411	540.033	548.469	583.62	564.893
ENSG00000110801	O00233	5715	PSMD9	26S proteasome non-ATPase regulatory subunit 9 OS=Homo sapiens (Human) OX=9606 GN=PSMD9 PE=1 SV=3 source=Uniprot,https://www.uniprot.org/uniprot/O00233	24.7	327.366	357.819	322.075	507.721	372.977	535.54	385.867	469.306	420.823	383.081	480.557	479.198	456.217	382.683	422.351	400.282	304.768	360.703	323.841	310.955	316.367	301.151	372.567	393.324
ENSG00000177556	O00244	475	ATOX1	Copper transport protein ATOX1 OS=Homo sapiens (Human) OX=9606 GN=ATOX1 PE=1 SV=1 source=Uniprot,https://www.uniprot.org/uniprot/O00244	7.4	485.611	644.115	580.079	583.788	521.998	842.149	598.152	672.3	597.16	559.51	643.473	690.209	865.011	693.838	1068.96	850.027	885.501	779.47	775.826	754.577	686.097	678.569	756.973	807.915
ENSG00000133895	O00255	4221	MEN1	Menin OS=Homo sapiens (Human) OX=9606 GN=MEN1 PE=1 SV=4 source=Uniprot,https://www.uniprot.org/uniprot/O00255	68	113.734	95.5362	118.725	126.185	112.966	114.102	110.266	118.227	115.764	119.56	121.084	108.16	109.832	104.692	87.9182	111.473	103.95	99.4701	117.638	131.009	127.797	135.131	130.413	122.838
ENSG00000141582	O00257	8535	CBX4	E3 SUMO-protein ligase CBX4 OS=Homo sapiens (Human) OX=9606 GN=CBX4 PE=1 SV=3 source=Uniprot,https://www.uniprot.org/uniprot/O00257	61.3	77.8553	67.163	65.6246	87.6935	85.2178	89.8438	92.113	84.858	83.7236	92.359	84.4566	76.713	98.2539	91.8188	93.6506	96.0504	116.246	93.8689	123.849	116.805	114.351	118.13	92.9822	108.843
ENSG00000182093	O00258	7485	GET1	Tail-anchored protein insertion receptor WRB OS=Homo sapiens (Human) OX=9606 GN=WRB PE=1 SV=2 source=Uniprot,https://www.uniprot.org/uniprot/O00258	19.8	54.2461	53.2156	56.8608	21.9241	61.5971	11.4926	42.5652	30.851	23.0297	35.2132	29.3093	11.165	42.8073	34.8743	15.2306	30.2801	78.6719	24.7264	46.6711	72.8892	76.8691	73.2551	35.8881	24.456
ENSG00000101856	O00264	10857	PGRMC1	Membrane-associated progesterone receptor component 1 OS=Homo sapiens (Human) OX=9606 GN=PGRMC1 PE=1 SV=3 source=Uniprot,https://www.uniprot.org/uniprot/O00264	21.7	1693.52	2034.19	1806.24	1221.47	1481.12	1310.3	1263.56	1047.46	1079.14	1012.47	1054.29	947.286	1465.33	1426.19	1403.69	1242.09	1356.06	1181.6	1191.23	1255.85	1219.29	1345.28	1142.47	1073.44
ENSG00000196235	O00267	6829	SUPT5H	Transcription elongation factor SPT5 OS=Homo sapiens (Human) OX=9606 GN=SUPT5H PE=1 SV=1 source=Uniprot,https://www.uniprot.org/uniprot/O00267	120.9	217.191	198.023	202.368	207.891	203.254	186.21	210.302	198.089	199.865	208.146	207.206	199.989	196.634	197.226	183.289	199.663	193.595	179.677	202.561	207.816	205.089	209.768	199.579	206.844
ENSG00000130699	O00268	6874	TAF4	Transcription initiation factor TFIID subunit 4 OS=Homo sapiens (Human) OX=9606 GN=TAF4 PE=1 SV=2 source=Uniprot,https://www.uniprot.org/uniprot/O00268	110	99.7317	88.6252	102.259	101.646	102.043	84.9045	94.2935	92.6655	89.4243	97.9487	97.7007	88.4459	87.5959	85.434	72.2121	85.7425	82.8742	74.4189	87.532	91.0696	91.2435	87.6572	94.4645	88.5911
ENSG00000160049	O00273	1676	DFFA	DNA fragmentation factor subunit alpha OS=Homo sapiens (Human) OX=9606 GN=DFFA PE=1 SV=1 source=Uniprot,https://www.uniprot.org/uniprot/O00273	36.5	134.306	183.954	158.728	251.964	188.654	259.552	166.731	224.718	208.75	165.652	179.8	232.863	183.338	191.376	271.198	185.385	153.854	180.266	183.739	164.268	144.407	122.481	180.636	203.752
ENSG00000133111	O00287	5994	RFXAP	Regulatory factor X-associated protein OS=Homo sapiens (Human) OX=9606 GN=RFXAP PE=1 SV=1 source=Uniprot,https://www.uniprot.org/uniprot/O00287	28.2	37.4495	44.3992	42.3842	38.368	44.6034	31.7358	37.9223	41.0436	36.6009	44.1049	38.6605	39.3672	31.3523	33.7242	28.8422	41.7304	33.1299	32.0799	38.7289	36.7864	33.8859	43.698	46.1939	40.4703
ENSG00000127946	O00291	3092	HIP1	Huntingtin-interacting protein 1 OS=Homo sapiens (Human) OX=9606 GN=HIP1 PE=1 SV=5 source=Uniprot,https://www.uniprot.org/uniprot/O00291	116.1	102.377	128.163	122.402	113.403	110.88	109.584	109.143	114.688	120.501	130.1	152.59	134.54	100.585	104.915	105.919	106.122	102.626	106.797	91.8852	95.1519	104.761	76.5471	96.8861	98.0567
ENSG00000213719	O00299	1192	CLIC1	Chloride intracellular channel protein 1 OS=Homo sapiens (Human) OX=9606 GN=CLIC1 PE=1 SV=4 source=Uniprot,https://www.uniprot.org/uniprot/O00299	26.9	728.67	846.667	788.005	693.082	688.021	736.859	705.04	704.397	736.96	719.152	750.936	772.143	468.468	450.446	502.453	562.922	575.079	526.284	520.81	600.418	589.11	532.389	596.173	633.595
ENSG00000175390	O00303	8665	EIF3F	Eukaryotic translation initiation factor 3 subunit F OS=Homo sapiens (Human) OX=9606 GN=EIF3F PE=1 SV=1 source=Uniprot,https://www.uniprot.org/uniprot/O00303	37.5	416.449	387.396	408.301	323.841	354.253	325.991	352.626	322.562	342.722	350.307	328.183	321.315	278.282	344.436	317.115	301.268	347.641	322.025	383.97	337.277	348.515	343.373	290.031	291.259
ENSG00000198373	O00308	11060	WWP2	NEDD4-like E3 ubiquitin-protein ligase WWP2 OS=Homo sapiens (Human) OX=9606 GN=WWP2 PE=1 SV=2 source=Uniprot,https://www.uniprot.org/uniprot/O00308	98.9	15.4351	16.4977	16.1846	14.5619	14.8209	13.1314	16.2839	13.3927	14.7079	16.1173	13.6045	13.508	17.7386	13.2726	14.177	13.9809	14.1019	11.6646	16.0232	16.6495	16.0066	18.9238	13.6051	13.8928
ENSG00000110435	O00330	8050	PDHX	Pyruvate dehydrogenase protein X component, mitochondrial OS=Homo sapiens (Human) OX=9606 GN=PDHX PE=1 SV=3 source=Uniprot,https://www.uniprot.org/uniprot/O00330	54.1	117.988	117.577	113.104	147.785	131.51	116.045	130.051	107.386	117.559	112.236	112.142	105.441	152.392	144.518	140.422	182.141	167.513	147.986	195.537	148.773	148.055	151.574	144.547	133.843
ENSG00000104671	O00399	10671	DCTN6	Dynactin subunit 6 OS=Homo sapiens (Human) OX=9606 GN=DCTN6 PE=1 SV=1 source=Uniprot,https://www.uniprot.org/uniprot/O00399	20.7	234.909	346.689	262.981	288.516	311.819	295.006	265.9	276.395	300.151	292.28	292.106	305.973	479.133	402.484	394.663	408.628	418.02	377.105	362.644	399.373	389.82	317.135	375.688	392.06
ENSG00000169359	O00400	9197	SLC33A1	Acetyl-coenzyme A transporter 1 OS=Homo sapiens (Human) OX=9606 GN=SLC33A1 PE=1 SV=1 source=Uniprot,https://www.uniprot.org/uniprot/O00400	60.9	17.3761	29.8319	23.5801	23.9064	24.7277	13.7271	21.552	14.1394	18.8913	20.4956	24.3129	15.5032	17.2118	16.6579	10.9821	18.8175	28.5263	14.7506	18.5877	28.098	20.821	15.3521	39.8915	15.9063
ENSG00000106299	O00401	8976	WASL	Neural Wiskott-Aldrich syndrome protein OS=Homo sapiens (Human) OX=9606 GN=WASL PE=1 SV=2 source=Uniprot,https://www.uniprot.org/uniprot/O00401	54.8	107.247	85.6059	94.4221	101.237	102.358	95.0124	123.178	109.233	101.488	121.511	94.3758	97.3879	82.8481	81.9886	70.1994	81.6841	85.037	78.2819	103.381	77.7096	93.8586	103.365	93.771	85.219
ENSG00000186642	O00408	5138	PDE2A	cGMP-dependent 3',5'-cyclic phosphodiesterase OS=Homo sapiens (Human) OX=9606 GN=PDE2A PE=1 SV=1 source=Uniprot,https://www.uniprot.org/uniprot/O00408	105.6	31.5936	38.898	43.7133	32.1022	38.1911	25.3037	27.0471	33.7468	27.1254	25.2859	28.1779	24.607	29.1977	25.9905	27.5239	58.7086	78.9268	46.024	46.0795	50.9009	44.2528	69.7245	51.722	44.4175
ENSG00000065150	O00410	3843	IPO5	Importin-5 OS=Homo sapiens (Human) OX=9606 GN=IPO5 PE=1 SV=4 source=Uniprot,https://www.uniprot.org/uniprot/O00410	123.6	379.92	418.759	365.158	376.43	388.782	368.861	352.349	310.088	349.436	344.086	339.234	359.084	250.186	247.196	276.43	246.615	248.669	231.492	237.894	246.705	229.48	252.877	241.046	253.042
ENSG00000099821	O00411	5442	POLRMT	DNA-directed RNA polymerase, mitochondrial OS=Homo sapiens (Human) OX=9606 GN=POLRMT PE=1 SV=2 source=Uniprot,https://www.uniprot.org/uniprot/O00411	138.5	9.4621	10.2969	10.5646	11.265	10.1878	12.8577	8.91053	11.3116	11.8265	9.82772	10.8723	12.8168	9.65	10.6965	13.0899	10.9785	8.12459	10.4193	10.0462	10.6898	10.8955	7.20248	11.716	12.0819
ENSG00000103319	O00418	29904	EEF2K	Eukaryotic elongation factor 2 kinase OS=Homo sapiens (Human) OX=9606 GN=EEF2K PE=1 SV=2 source=Uniprot,https://www.uniprot.org/uniprot/O00418	82.1	3.32105	7.60342	8.4235	8.73296	7.2963	10.235	6.0085	6.82701	9.34497	6.91224	6.86723	9.55957	4.95167	5.2997	9.46855	5.18733	5.37047	6.29437	5.10868	5.48985	6.39456	2.99446	5.6846	7.30861
ENSG00000150459	O00422	10284	SAP18	Histone deacetylase complex subunit SAP18 OS=Homo sapiens (Human) OX=9606 GN=SAP18 PE=1 SV=1 source=Uniprot,https://www.uniprot.org/uniprot/O00422	17.6	478.782	480.69	651.505	565.584	514.492	475.874	474.804	476.843	411.123	450.616	477.951	395.057	598.863	506.325	473.949	616.244	458.813	396.052	468.083	504.268	487.515	496.935	502.329	440.809
ENSG00000066629	O00423	2009	EML1	Echinoderm microtubule-associated protein-like 1 OS=Homo sapiens (Human) OX=9606 GN=EML1 PE=1 SV=3 source=Uniprot,https://www.uniprot.org/uniprot/O00423	89.8	247.572	221.39	259.067	189.793	217.749	181.132	230.906	196.33	213.482	147.325	130.632	194.804	149.914	124.131	145.537	308.975	443.546	303.174	350.095	276.733	267.846	255.862	208.813	216.206
ENSG00000136231	O00425	10643	IGF2BP3	Insulin-like growth factor 2 mRNA-binding protein 3 OS=Homo sapiens (Human) OX=9606 GN=IGF2BP3 PE=1 SV=2 source=Uniprot,https://www.uniprot.org/uniprot/O00425	63.7	391.286	447.235	397.466	348.024	366.057	333.587	259.354	272.002	281.961	235.097	225.495	208.307	390.729	540.937	445.006	311.619	304.987	263.936	244.412	216.318	214.609	155.788	185.09	157.898
ENSG00000087470	O00429	10059	DNM1L	Dynamin-1-like protein OS=Homo sapiens (Human) OX=9606 GN=DNM1L PE=1 SV=2 source=Uniprot,https://www.uniprot.org/uniprot/O00429	81.8	280.696	315.116	293.487	274.194	289.885	289.916	275.111	264.69	290.522	285.017	291.022	286.214	324.428	335.455	389.737	377.284	409.553	380.262	398.581	399.566	372.583	437.638	361.708	382.734
ENSG00000137996	O00442	8634	RTCA	RNA 3'-terminal phosphate cyclase OS=Homo sapiens (Human) OX=9606 GN=RTCA PE=1 SV=1 source=Uniprot,https://www.uniprot.org/uniprot/O00442	39.3	134.768	155.568	138.845	162.147	144.636	130.53	150.296	163.982	150.176	148.361	148.313	149.904	218.702	266.836	239.793	251.022	228.815	211.954	248.318	226.189	225.66	221.886	207.291	243.128
ENSG00000011405	O00443	5286	PIK3C2A	Phosphatidylinositol 4-phosphate 3-kinase C2 domain-containing subunit alpha OS=Homo sapiens (Human) OX=9606 GN=PIK3C2A PE=1 SV=2 source=Uniprot,https://www.uniprot.org/uniprot/O00443	190.6	21.6573	26.1619	22.7759	26.3375	27.1146	23.7294	24.2582	25.402	24.6819	24.9478	23.796	24.4897	12.8197	12.0149	15.9959	12.9603	13.5414	15.4269	13.9225	15.2053	16.107	17.0288	15.8637	17.4344
ENSG00000105647	O00459	5296	PIK3R2	Phosphatidylinositol 3-kinase regulatory subunit beta OS=Homo sapiens (Human) OX=9606 GN=PIK3R2 PE=1 SV=2 source=Uniprot,https://www.uniprot.org/uniprot/O00459	81.5	21.898	30.6674	34.5605	43.2089	35.5188	51.5612	30.2001	44.0981	44.2814	41.4943	40.8748	45.5155	52.172	50.4066	63.8597	68.4929	61.762	63.9804	68.1571	53.1936	56.6619	25.1061	50.234	57.3797
ENSG00000173905	O00461	27333	GOLIM4	Golgi integral membrane protein 4 OS=Homo sapiens (Human) OX=9606 GN=GOLIM4 PE=1 SV=1 source=Uniprot,https://www.uniprot.org/uniprot/O00461	81.8	94.6998	129.704	135.33	104.854	105.469	84.7625	104.077	91.6346	101.037	101.713	93.4073	102.204	74.4183	59.5937	62.3122	73.7901	68.3745	54.479	67.8768	81.8523	78.2604	90.9152	73.892	75.2358
ENSG00000109323	O00462	4126	MANBA	Beta-mannosidase OS=Homo sapiens (Human) OX=9606 GN=MANBA PE=1 SV=3 source=Uniprot,https://www.uniprot.org/uniprot/O00462	100.8	41.9819	62.1458	53.6087	61.1519	56.2409	56.4533	49.875	50.1617	52.5953	43.3409	54.3837	52.1534	43.3838	53.1775	46.5229	53.8682	47.8871	40.2999	45.0761	45.6396	36.104	45.0066	56.5435	49.1798
ENSG00000188157	O00468	375790	AGRN	Agrin OS=Homo sapiens (Human) OX=9606 GN=AGRN PE=1 SV=6 source=Uniprot,https://www.uniprot.org/uniprot/O00468	217.2	34.9995	38.8279	32.6665	30.2562	29.3878	29.5821	31.3956	29.0561	28.7561	28.7283	26.3184	27.8408	23.9688	24.5608	25.8215	21.1884	24.8416	27.9428	22.7674	27.1138	30.3331	35.0827	26.7721	27.1871
ENSG00000152952	O00469	5352	PLOD2	Procollagen-lysine,2-oxoglutarate 5-dioxygenase 2 OS=Homo sapiens (Human) OX=9606 GN=PLOD2 PE=1 SV=2 source=Uniprot,https://www.uniprot.org/uniprot/O00469	84.6	92.1718	76.2015	69.8574	31.1641	44.4694	40.7121	63.9749	81.6476	57.7646	47.5656	48.8347	63.6515	30.7643	27.4785	32.9723	24.0201	21.3603	22.5198	24.0898	30.4825	27.2827	29.9948	35.396	33.3058
ENSG00000070367	O00471	10640	EXOC5	Exocyst complex component 5 OS=Homo sapiens (Human) OX=9606 GN=EXOC5 PE=1 SV=1 source=Uniprot,https://www.uniprot.org/uniprot/O00471	81.8	99.5725	99.1846	100.194	98.1351	95.6136	96.8805	104.389	89.669	102.166	107.961	105.015	104.472	105.608	114.187	118.052	117.246	119.314	104.264	106.887	102.538	108.974	130.607	111.723	116.935
ENSG00000182952	O00479	10473	HMGN4	High mobility group nucleosome-binding domain-containing protein 4 OS=Homo sapiens (Human) OX=9606 GN=HMGN4 PE=1 SV=3 source=Uniprot,https://www.uniprot.org/uniprot/O00479	9.5	374.286	318.552	273.671	891.439	454.864	960.996	649.49	857.571	913.89	763.752	807.147	932.543	911.818	1053.72	999.911	1265.25	838.92	1122.63	1217.02	951.974	980.06	524.287	1282.87	1318.61
ENSG00000189043	O00483	4697	NDUFA4	Cytochrome c oxidase subunit NDUFA4 OS=Homo sapiens (Human) OX=9606 GN=NDUFA4 PE=1 SV=1 source=Uniprot,https://www.uniprot.org/uniprot/O00483	9.4	449.466	530.293	626.203	380.661	365.955	328.244	527.259	391.56	426.64	568.877	627.262	521.061	467.595	543.123	424.631	370.631	328.951	273.872	452.579	509.157	508.503	644.029	599.102	493.829
ENSG00000136717	O00499	274	BIN1	Myc box-dependent-interacting protein 1 OS=Homo sapiens (Human) OX=9606 GN=BIN1 PE=1 SV=1 source=Uniprot,https://www.uniprot.org/uniprot/O00499	64.7	100.878	69.8708	65.8428	65.812	56.9556	72.0004	96.712	70.3404	86.1859	68.7495	83.9676	79.2958	138.123	150.194	142.065	110.588	82.268	80.2097	70.3777	57.2785	65.6632	77.0557	92.6031	100.511
ENSG00000102753	O00505	3839	KPNA3	Importin subunit alpha-4 OS=Homo sapiens (Human) OX=9606 GN=KPNA3 PE=1 SV=2 source=Uniprot,https://www.uniprot.org/uniprot/O00505	57.8	209.4	292.049	272.355	278.324	315.758	284.251	209.195	276.659	259.443	228.1	237.923	256.476	227.42	235.999	262.403	283.441	276.339	243.762	239.863	278.661	253.744	201.279	237.846	250.874
ENSG00000115694	O00506	10494	STK25	Serine/threonine-protein kinase 25 OS=Homo sapiens (Human) OX=9606 GN=STK25 PE=1 SV=1 source=Uniprot,https://www.uniprot.org/uniprot/O00506	48.1	24.8381	20.9339	15.9494	23.2619	18.3881	24.1882	28.8912	27.4748	25.9913	26.4393	26.7407	29.9488	27.7747	27.6231	30.6256	29.2345	26.6753	29.3658	30.0034	27.2956	24.6903	30.0548	27.3375	31.3812
ENSG00000116128	O00512	607	BCL9	B-cell CLL/lymphoma 9 protein OS=Homo sapiens (Human) OX=9606 GN=BCL9 PE=1 SV=4 source=Uniprot,https://www.uniprot.org/uniprot/O00512	149.2	43.3408	41.5886	43.3447	41.049	42.3541	33.9836	34.0843	35.4963	32.9084	33.1635	26.9968	26.696	38.2813	36.9478	34.9851	38.7364	41.9275	30.8038	40.8198	43.5545	39.973	43.235	30.8152	35.8377
ENSG00000117480	O00519	2166	FAAH	Fatty-acid amide hydrolase 1 OS=Homo sapiens (Human) OX=9606 GN=FAAH PE=1 SV=2 source=Uniprot,https://www.uniprot.org/uniprot/O00519	63	29.2576	29.9002	28.9774	23.9245	29.2535	21.0034	29.5356	23.5533	28.0098	22.0073	22.7887	20.8168	37.6649	40.0611	27.8465	36.6814	52.8427	39.3675	54.8626	51.3952	47.7536	48.0862	41.795	37.8034
ENSG00000134121	O00533	10752	CHL1	Neural cell adhesion molecule L1-like protein OS=Homo sapiens (Human) OX=9606 GN=CHL1 PE=1 SV=4 source=Uniprot,https://www.uniprot.org/uniprot/O00533	135	7.84812	6.25963	5.81573	5.9654	4.4331	5.38269	7.52621	4.95168	6.57115	6.91677	6.33759	5.73884	7.78493	14.7039	10.6516	7.16494	9.38204	7.70023	10.3461	12.8901	15.7787	9.82103	10.0552	9.47674
ENSG00000110002	O00534	4013	VWA5A	von Willebrand factor A domain-containing protein 5A OS=Homo sapiens (Human) OX=9606 GN=VWA5A PE=2 SV=2 source=Uniprot,https://www.uniprot.org/uniprot/O00534	86.4	57.2977	62.3822	50.991	48.4206	51.0276	45.5273	59.6686	58.043	48.3738	53.2532	50.9832	51.2935	103.12	105.505	87.7457	42.7672	47.1815	46.3971	39.6688	38.145	38.6634	37.4925	47.3192	38.854
ENSG00000100029	O00541	23481	PES1	Pescadillo homolog OS=Homo sapiens (Human) OX=9606 GN=PES1 PE=1 SV=1 source=Uniprot,https://www.uniprot.org/uniprot/O00541	68	193.251	207.083	192.865	172.667	189.07	157.509	154.785	136.64	147.186	153.583	136.015	145.45	117.503	104.693	121.119	132.246	133.088	131.628	169.146	191.609	146.136	144.807	126.01	133.943
ENSG00000147654	O00559	9166	EBAG9	Receptor-binding cancer antigen expressed on SiSo cells OS=Homo sapiens (Human) OX=9606 GN=EBAG9 PE=1 SV=1 source=Uniprot,https://www.uniprot.org/uniprot/O00559	24.4	35.6819	44.0054	47.4023	50.6297	46.6315	38.5902	47.2226	49.2719	50.7552	45.1547	50.0357	43.4949	74.5992	80.2051	70.7627	77.3899	70.0032	61.1375	79.166	80.0038	87.5852	49.9165	74.1947	74.294
ENSG00000137575	O00560	6386	SDCBP	Syntenin-1 OS=Homo sapiens (Human) OX=9606 GN=SDCBP PE=1 SV=1 source=Uniprot,https://www.uniprot.org/uniprot/O00560	32.4	162.426	186.033	172.758	210.49	165.412	167.587	180.312	252.881	193.811	214.292	203.676	191.873	116.541	99.6454	103.845	139.061	130.994	130.333	156.929	160.419	161.49	264.286	248.776	284.338
ENSG00000110697	O00562	9600	PITPNM1	Membrane-associated phosphatidylinositol transfer protein 1 OS=Homo sapiens (Human) OX=9606 GN=PITPNM1 PE=1 SV=4 source=Uniprot,https://www.uniprot.org/uniprot/O00562	134.8	48.1348	29.3359	35.7187	32.2766	32.6375	27.3992	53.767	29.6635	41.5459	28.4988	25.5717	36.6113	40.0503	54.7939	35.649	34.5288	32.0418	31.3426	33.6956	26.1134	34.7605	38.917	30.6258	35.0507
ENSG00000124383	O00566	10199	MPHOSPH10	U3 small nucleolar ribonucleoprotein protein MPP10 OS=Homo sapiens (Human) OX=9606 GN=MPHOSPH10 PE=1 SV=2 source=Uniprot,https://www.uniprot.org/uniprot/O00566	78.8	119.658	104.306	107.865	130.82	102.214	126.512	106.198	117.203	117.993	98.6507	105.393	102.978	100.256	90.5159	93.9749	120.61	93.5543	108.302	118.288	105.881	109.733	92.5029	94.9442	96.8931
ENSG00000101361	O00567	10528	NOP56	Nucleolar protein 56 OS=Homo sapiens (Human) OX=9606 GN=NOP56 PE=1 SV=4 source=Uniprot,https://www.uniprot.org/uniprot/O00567	66	586.323	505.012	585.187	570.502	560.298	571.799	529.088	542.158	522.583	485.946	521.595	495.066	530.301	500.373	456.365	532.406	512.278	526.462	630.085	566.308	543.952	521.122	566.385	543.661
ENSG00000182968	O00570	6656	SOX1	Transcription factor SOX-1 OS=Homo sapiens (Human) OX=9606 GN=SOX1 PE=1 SV=2 source=Uniprot,https://www.uniprot.org/uniprot/O00570	39	57.8211	47.6645	48.4596	56.997	68.9128	43.6224	58.9075	65.947	42.7543	55.9614	73.2133	43.2466	31.6328	25.2162	29.4004	31.5437	28.1163	29.0268	23.7761	29.5835	45.3564	29.9008	23.6223	32.913
ENSG00000215301	O00571	1654	DDX3X	ATP-dependent RNA helicase DDX3X OS=Homo sapiens (Human) OX=9606 GN=DDX3X PE=1 SV=3 source=Uniprot,https://www.uniprot.org/uniprot/O00571	73.2	445.925	465.023	520.313	467.986	414.457	449.191	441.622	439.382	482.672	473.223	465.994	477.939	414.182	454.485	454.983	419.937	375.609	407.501	447.842	412.725	459.032	423.859	428.374	434.546
ENSG00000128567	O00592	5420	PODXL	Podocalyxin OS=Homo sapiens (Human) OX=9606 GN=PODXL PE=1 SV=2 source=Uniprot,https://www.uniprot.org/uniprot/O00592	58.6	31.0152	57.3855	34.8833	27.139	26.0658	22.8118	30.1059	20.2904	24.5192	18.9249	16.4801	19.8283	18.9578	15.153	27.1035	13.5655	14.4537	16.6632	14.3506	18.1824	19.5371	18.6116	16.4247	22.5971
ENSG00000087842	O00625	8544	PIR	Pirin OS=Homo sapiens (Human) OX=9606 GN=PIR PE=1 SV=1 source=Uniprot,https://www.uniprot.org/uniprot/O00625	32.1	64.9045	92.0641	81.0057	96.1434	126.136	100.082	141.753	180.346	136.523	168.587	107.019	133.256	55.5211	52.803	45.4268	68.973	67.2773	47.8629	64.6284	74.6114	65.182	82.8335	78.6538	74.176
ENSG00000186432	O00629	3840	KPNA4	Importin subunit alpha-3 OS=Homo sapiens (Human) OX=9606 GN=KPNA4 PE=1 SV=1 source=Uniprot,https://www.uniprot.org/uniprot/O00629	57.9	207.312	189.708	221.292	209.77	191.564	215.711	182.632	187.636	197.771	175.801	187.438	197.882	183.154	183.838	195.325	197.777	188.148	186.235	175.268	169.586	185.776	181.72	186.134	182.254
ENSG00000112343	O00635	10475	TRIM38			21.7862	21.0446	22.3851	18.4532	23.6238	16.6123	17.7063	17.1384	16.6593	19.7175	15.3384	14.9741	6.22359	5.47506	7.59727	4.74714	7.20829	6.75767	6.06473	6.59368	5.83686	7.13217	5.97228	6.05607
ENSG00000147862	O00712	4781	NFIB	Nuclear factor 1 B-type OS=Homo sapiens (Human) OX=9606 GN=NFIB PE=1 SV=2 source=Uniprot,https://www.uniprot.org/uniprot/O00712	47.4	151.135	121.312	130.508	205.527	222.31	193.135	211.043	230.952	211.316	261.559	271.936	222.337	137.269	99.6694	139.97	332.923	441.901	343.683	272.131	328.802	332.124	341.16	280.448	261.859
ENSG00000119414	O00743	5537	PPP6C	Serine/threonine-protein phosphatase 6 catalytic subunit OS=Homo sapiens (Human) OX=9606 GN=PPP6C PE=1 SV=1 source=Uniprot,https://www.uniprot.org/uniprot/O00743	35.1	254.792	269.796	266.53	268.811	269.219	291.353	260.972	263.23	254.731	261.009	266.581	270.854	222.491	231.216	258.64	246.884	227.4	224.961	229.695	205.823	203.689	207.646	212.008	213.527
ENSG00000103202	O00746	4833	NME4	Nucleoside diphosphate kinase, mitochondrial OS=Homo sapiens (Human) OX=9606 GN=NME4 PE=1 SV=1 source=Uniprot,https://www.uniprot.org/uniprot/O00746	20.6	122.339	143.276	157.215	158.695	191.83	203.585	129.327	148.893	156.615	151.41	188.535	163.675	146.393	118.098	174.144	154.168	146.5	138.158	131.936	117.319	134.481	115.487	140.844	121.218
ENSG00000172831	O00748	8824	CES2	Cocaine esterase OS=Homo sapiens (Human) OX=9606 GN=CES2 PE=1 SV=1 source=Uniprot,https://www.uniprot.org/uniprot/O00748	61.8	6.2216	7.90935	8.33081	7.24927	8.6425	9.19731	7.39239	11.1197	10.7797	9.73492	9.94783	10.0994	8.10788	10.4422	12.3179	7.36043	9.41301	10.1347	8.87401	12.4357	12.5041	8.96945	12.6751	11.68
ENSG00000133056	O00750	5287	PIK3C2B	Phosphatidylinositol 4-phosphate 3-kinase C2 domain-containing subunit beta OS=Homo sapiens (Human) OX=9606 GN=PIK3C2B PE=1 SV=2 source=Uniprot,https://www.uniprot.org/uniprot/O00750	184.7	18.9508	20.3865	23.2679	19.1088	20.6821	21.939	14.8399	21.6025	19.1622	15.4223	18.6729	17.7967	21.8999	25.0202	25.1526	22.5885	24.4489	25.1822	20.0562	21.0179	21.8005	19.5825	21.0975	21.2977
ENSG00000104774	O00754	4125	MAN2B1	Lysosomal alpha-mannosidase OS=Homo sapiens (Human) OX=9606 GN=MAN2B1 PE=1 SV=3 source=Uniprot,https://www.uniprot.org/uniprot/O00754	113.7	90.124	89.6264	84.6286	64.2859	79.2691	67.2343	90.2195	72.2184	79.23	70.2845	74.4231	76.7706	79.5614	92.7859	80.2213	77.7441	88.605	80.0413	93.3717	86.3676	100.722	123.119	91.0987	88.5647
ENSG00000175063	O00762	11065	UBE2C	Ubiquitin-conjugating enzyme E2 C OS=Homo sapiens (Human) OX=9606 GN=UBE2C PE=1 SV=1 source=Uniprot,https://www.uniprot.org/uniprot/O00762	19.6	99.7339	91.1682	105.251	127.677	92.0274	141.034	87.9133	85.9167	119.982	113.618	116.776	110.021	75.181	32.2343	27.1666	15.7994	30.8947	30.9161	14.7737	33.2397	31.9283	22.808	33.3163	26.9889
ENSG00000160209	O00764	8566	PDXK	Pyridoxal kinase OS=Homo sapiens (Human) OX=9606 GN=PDXK PE=1 SV=1 source=Uniprot,https://www.uniprot.org/uniprot/O00764	35.1	160.518	171.342	170.176	161.16	180.422	152.681	176.98	183.631	176.982	184.637	160.247	178.691	165.416	161.488	144.722	184.285	228.091	151.558	245.809	241.479	216.866	289.423	216.724	215.109
ENSG00000099194	O00767	6319	SCD	Acyl-CoA desaturase OS=Homo sapiens (Human) OX=9606 GN=SCD PE=1 SV=2 source=Uniprot,https://www.uniprot.org/uniprot/O00767	41.5	149.855	107.891	168.295	140.865	87.1227	108.646	78.2812	95.3537	72.2581	62.9917	47.1106	47.4577	82.4093	44.1631	65.725	74.9783	57.5982	48.2475	65.9647	52.2924	56.3109	39.3629	29.414	35.7676
ENSG00000170579	O14490	9229	DLGAP1	Disks large-associated protein 1 OS=Homo sapiens (Human) OX=9606 GN=DLGAP1 PE=1 SV=1 source=Uniprot,https://www.uniprot.org/uniprot/O14490	108.8	3.35657	2.83463	1.79547	5.54553	5.32363	4.40329	5.81294	8.18708	6.71417	7.01233	6.19021	3.64682	7.61953	7.67101	7.36772	9.98979	11.4431	9.35913	10.7526	10.15	9.73238	11.518	8.89508	10.6874
ENSG00000162407	O14495	8613	PLPP3	Phospholipid phosphatase 3 OS=Homo sapiens (Human) OX=9606 GN=PLPP3 PE=1 SV=1 source=Uniprot,https://www.uniprot.org/uniprot/O14495	35.1	97.6937	118.553	85.4808	63.8002	108.857	59.2417	90.0262	54.0647	67.522	57.2886	43.6877	70.4317	34.1577	40.0475	40.5722	29.1336	48.1754	42.8905	31.8187	45.9082	41.9251	41.633	41.6826	41.9382
ENSG00000117713	O14497	8289	ARID1A	AT-rich interactive domain-containing protein 1A OS=Homo sapiens (Human) OX=9606 GN=ARID1A PE=1 SV=3 source=Uniprot,https://www.uniprot.org/uniprot/O14497	241.9	252.129	215.253	230.683	216.234	224.572	192.002	215.954	190.236	202.592	210.388	210.004	194.418	223.976	216.337	191.202	202.923	208.128	178.107	198.034	192.718	203.001	194.008	175.707	173.172
ENSG00000111328	O14519	8099	CDK2AP1	Cyclin-dependent kinase 2-associated protein 1 OS=Homo sapiens (Human) OX=9606 GN=CDK2AP1 PE=1 SV=1 source=Uniprot,https://www.uniprot.org/uniprot/O14519	12.4	339.328	254.745	431.776	356.514	288.926	265.146	341.156	383.22	333.679	373.88	403.114	300.098	293.418	224.716	203.201	325.748	306.116	260.957	354.566	282.451	413.564	319.263	311.358	259.581
ENSG00000204370	O14521	6392	SDHD	Succinate dehydrogenase [ubiquinone] cytochrome b small subunit, mitochondrial OS=Homo sapiens (Human) OX=9606 GN=SDHD PE=1 SV=1 source=Uniprot,https://www.uniprot.org/uniprot/O14521	17	137.653	118.45	138.515	82.2511	177.103	35.5151	105.167	62.8941	64.8779	80.8769	79.2665	57.8843	52.6022	56.6074	32.6562	73.6794	138.506	63.3064	114.076	142.294	111.996	143.522	95.0841	53.3808
ENSG00000172375	O14523	9854	C2CD2L	Phospholipid transfer protein C2CD2L OS=Homo sapiens (Human) OX=9606 GN=C2CD2L PE=1 SV=3 source=Uniprot,https://www.uniprot.org/uniprot/O14523	76.1	9.45231	10.514	8.84394	10.7451	10.5974	9.08365	10.4758	9.92142	10.3555	12.2248	10.7163	9.83112	23.8437	19.8136	16.7769	22.6353	33.4154	21.3651	26.2576	24.6271	22.3848	20.8061	19.6898	16.9326
ENSG00000166881	O14524	23306	NEMP1	Nuclear envelope integral membrane protein 1 OS=Homo sapiens (Human) OX=9606 GN=NEMP1 PE=1 SV=2 source=Uniprot,https://www.uniprot.org/uniprot/O14524	50.6	40.6428	48.982	56.4892	46.4448	60.6257	40.8054	45.4491	54.1723	47.003	45.8917	48.1137	39.9902	22.301	21.8343	24.6903	25.1922	26.1447	28.1429	23.798	29.8296	31.8507	19.3342	27.5984	24.2452
ENSG00000152092	O14525	460	ASTN1	Astrotactin-1 OS=Homo sapiens (Human) OX=9606 GN=ASTN1 PE=2 SV=3 source=Uniprot,https://www.uniprot.org/uniprot/O14525	144.8	12.04	13.1657	9.77749	4.4736	10.5646	8.80841	13.1516	6.62378	8.80085	11.1965	9.69849	9.01695	8.14417	10.7043	8.63159	5.40053	10.3422	11.2322	4.98879	8.84119	9.49466	9.16171	6.57681	7.40381
ENSG00000111249	O14529	23316	CUX2	Homeobox protein cut-like 2 OS=Homo sapiens (Human) OX=9606 GN=CUX2 PE=1 SV=4 source=Uniprot,https://www.uniprot.org/uniprot/O14529	161.6	9.19786	10.9855	8.14624	6.70378	7.15604	7.01909	10.3741	9.21558	9.95817	9.03907	8.01208	9.23776	7.33019	9.0605	7.80267	6.46711	7.14815	6.68519	13.0577	16.5014	18.71	31.8905	18.0572	22.0362
ENSG00000115514	O14530	10190	TXNDC9	Thioredoxin domain-containing protein 9 OS=Homo sapiens (Human) OX=9606 GN=TXNDC9 PE=1 SV=2 source=Uniprot,https://www.uniprot.org/uniprot/O14530	26.5	273.267	239	194.807	189.584	187.149	249.959	252.207	198.405	232.032	214.035	222.984	219.371	235.073	241.404	273.571	231.411	256.877	304.517	305.127	295.778	304.228	415.55	243.097	244.174
ENSG00000151640	O14531	10570	DPYSL4	Dihydropyrimidinase-related protein 4 OS=Homo sapiens (Human) OX=9606 GN=DPYSL4 PE=1 SV=2 source=Uniprot,https://www.uniprot.org/uniprot/O14531	61.8	540.701	593.758	507.186	470.378	484.171	439.639	536.273	486.743	490.972	549.541	520.635	527.959	608.16	724.58	631.264	533.953	552.039	511.722	599.945	625.63	589.308	828.015	664.046	713.259
ENSG00000135148	O14545	10906	TRAFD1	TRAF-type zinc finger domain-containing protein 1 OS=Homo sapiens (Human) OX=9606 GN=TRAFD1 PE=1 SV=1 source=Uniprot,https://www.uniprot.org/uniprot/O14545	64.8	101.125	90.284	122.683	121.316	89.1535	84.3264	116.013	123.504	111.294	131.052	132.096	112.881	105.236	113.846	88.7759	98.5643	81.9301	85.3413	114.882	84.6835	112.248	105.028	113.109	94.0946
ENSG00000115944	O14548	9167	COX7A2L	Cytochrome c oxidase subunit 7A-related protein, mitochondrial OS=Homo sapiens (Human) OX=9606 GN=COX7A2L PE=1 SV=2 source=Uniprot,https://www.uniprot.org/uniprot/O14548	12.6	391.872	429.569	388.121	346.47	354.123	335.847	368.273	293.963	343.974	371.459	369.281	381.133	502.447	377.666	418.577	401.53	374.42	359.855	457.37	485.146	420.413	467.391	457.944	440.889
ENSG00000004777	O14559	115703	ARHGAP33	Rho GTPase-activating protein 33 OS=Homo sapiens (Human) OX=9606 GN=ARHGAP33 PE=1 SV=2 source=Uniprot,https://www.uniprot.org/uniprot/O14559	137.1	4.6284	4.49743	4.11597	2.71386	4.11265	3.11134	5.03757	4.56453	4.87913	6.80645	5.18215	4.31049	5.05072	6.25976	4.78641	5.08481	7.19256	4.7467	10.2016	6.93733	6.58598	8.87765	5.26267	5.78868
ENSG00000004779	O14561	4706	NDUFAB1	Acyl carrier protein, mitochondrial OS=Homo sapiens (Human) OX=9606 GN=NDUFAB1 PE=1 SV=3 source=Uniprot,https://www.uniprot.org/uniprot/O14561	17.4	73.4218	66.3749	71.0061	124.184	86.1787	80.031	157.399	73.4749	75.7556	61.5234	75.0344	73.171	107.572	92.8375	96.6952	147.423	126.084	123.982	170.257	104.167	101.18	141.391	87.3697	89.7552
ENSG00000103353	O14562	56061	UBFD1	Ubiquitin domain-containing protein UBFD1 OS=Homo sapiens (Human) OX=9606 GN=UBFD1 PE=1 SV=2 source=Uniprot,https://www.uniprot.org/uniprot/O14562	33.4	337.901	330.447	308.769	289.788	228.25	244.257	273.548	253.44	257.318	249.86	286.386	260.112	276.236	312.941	283.99	259.455	217.324	239.027	269.596	229.404	251.462	305.491	294.718	268.1
ENSG00000158560	O14576	1780	DYNC1I1	Cytoplasmic dynein 1 intermediate chain 1 OS=Homo sapiens (Human) OX=9606 GN=DYNC1I1 PE=1 SV=2 source=Uniprot,https://www.uniprot.org/uniprot/O14576	72.9	16.761	16.4382	18.23	14.0208	17.7565	14.0399	15.4664	12.7038	16.0265	14.05	13.7041	15.347	29.2389	38.1557	19.1418	34.7489	71.061	29.554	83.4561	49.8444	52.8287	36.4217	24.2851	24.3038
ENSG00000122966	O14578	11113	CIT	Citron Rho-interacting kinase OS=Homo sapiens (Human) OX=9606 GN=CIT PE=1 SV=2 source=Uniprot,https://www.uniprot.org/uniprot/O14578	231.3	4.99666	4.95913	4.87497	2.82182	4.87551	3.15701	4.57007	4.19383	4.28283	6.87012	4.29139	6.1635	2.78563	2.61474	2.51805	2.32407	2.40544	2.60886	2.24302	2.74868	2.71221	2.26718	3.24793	2.61839
ENSG00000105669	O14579	11316	COPE	Coatomer subunit epsilon OS=Homo sapiens (Human) OX=9606 GN=COPE PE=1 SV=3 source=Uniprot,https://www.uniprot.org/uniprot/O14579	34.5	259.236	292.576	334.388	295.351	262.857	298.862	285.221	293.626	314.341	292.952	310.341	314.469	283.873	322.606	325.384	319.887	312.845	320.569	323.516	316.561	335.101	290.462	321.975	312.087
ENSG00000064490	O14593	8625	RFXANK	DNA-binding protein RFXANK OS=Homo sapiens (Human) OX=9606 GN=RFXANK PE=1 SV=2 source=Uniprot,https://www.uniprot.org/uniprot/O14593	28.1	18.4718	23.2587	27.8715	22.1834	19.7662	25.5108	19.7132	20.24	24.9837	18.2432	19.0268	27.0022	12.6754	14.3214	15.3555	15.215	21.5475	16.7549	15.4775	18.6119	16.9778	19.1644	16.0852	16.955
ENSG00000130287	O14594	1463	NCAN	Neurocan core protein OS=Homo sapiens (Human) OX=9606 GN=NCAN PE=1 SV=3 source=Uniprot,https://www.uniprot.org/uniprot/O14594	143	28.083	22.0283	25.3062	29.8923	25.0391	63.1696	31.7578	33.6365	35.8166	36.8825	34.1893	36.9217	32.0879	33.4256	39.932	30.6648	35.9148	36.3014	31.8958	39.4296	35.5134	36.215	39.8866	36.3195
ENSG00000065000	O14617	8943	AP3D1	AP-3 complex subunit delta-1 OS=Homo sapiens (Human) OX=9606 GN=AP3D1 PE=1 SV=1 source=Uniprot,https://www.uniprot.org/uniprot/O14617	130.1	131.041	142.367	139.911	125.742	122.885	113.503	137.569	135.369	128.939	135.344	146.129	126.875	136.584	161.167	145.98	153.249	139.909	125.754	163.493	140.656	153.706	180.087	162.532	149.368
ENSG00000173992	O14618	9973	CCS	Copper chaperone for superoxide dismutase OS=Homo sapiens (Human) OX=9606 GN=CCS PE=1 SV=1 source=Uniprot,https://www.uniprot.org/uniprot/O14618	29	165.608	147.033	134.267	179.762	188.011	155.715	157.955	162.401	148.665	146.512	139.921	153.867	128.191	119.887	119.572	142.32	149.825	133.077	163.332	151.103	145.929	147.662	156.317	162.043
ENSG00000099204	O14639	3983	ABLIM1	Actin-binding LIM protein 1 OS=Homo sapiens (Human) OX=9606 GN=ABLIM1 PE=1 SV=3 source=Uniprot,https://www.uniprot.org/uniprot/O14639	87.6	2.84662	5.75225	4.76859	5.16971	5.13041	4.39543	5.11641	4.93464	7.07006	4.7753	6.67983	11.4094	11.8369	8.99493	7.4782	7.14688	6.41153	4.76397	5.80084	7.52724	7.09044	4.00371	7.27349	7.2588
ENSG00000107404	O14640	1855	DVL1	Segment polarity protein dishevelled homolog DVL-1 OS=Homo sapiens (Human) OX=9606 GN=DVL1 PE=1 SV=2 source=Uniprot,https://www.uniprot.org/uniprot/O14640	75.1	6.39392	9.80294	8.70512	10.0865	7.68749	8.25076	8.92994	5.7014	8.02028	9.06936	6.01505	8.58782	9.96795	10.0952	8.80601	10.2436	9.03201	7.81687	8.16528	10.3324	9.78002	7.49466	8.90153	9.1182
ENSG00000004975	O14641	1856	DVL2	Segment polarity protein dishevelled homolog DVL-2 OS=Homo sapiens (Human) OX=9606 GN=DVL2 PE=1 SV=1 source=Uniprot,https://www.uniprot.org/uniprot/O14641	78.9	48.0819	47.3081	35.7804	43.4735	36.7086	31.2046	51.3465	35.4134	40.0228	41.167	41.7763	39.3374	27.8709	22.7384	17.8391	16.7847	18.5541	15.2055	23.3104	21.7277	21.576	30.6555	27.634	26.7824
ENSG00000153922	O14646	1105	CHD1	Chromodomain-helicase-DNA-binding protein 1 OS=Homo sapiens (Human) OX=9606 GN=CHD1 PE=1 SV=2 source=Uniprot,https://www.uniprot.org/uniprot/O14646	196.6	48.0123	43.0799	47.3915	41.0913	38.9194	38.5491	36.2881	35.9002	36.366	32.5932	34.7356	32.6094	27.9263	30.6477	28.111	26.805	26.2166	24.8434	26.6924	27.8772	27.1525	23.2606	23.891	24.0067
ENSG00000173575	O14647	1106	CHD2	Chromodomain-helicase-DNA-binding protein 2 OS=Homo sapiens (Human) OX=9606 GN=CHD2 PE=1 SV=2 source=Uniprot,https://www.uniprot.org/uniprot/O14647	211.2	49.8909	43.1479	52.6046	54.2543	45.8211	55.117	50.3691	61.1304	55.359	53.1621	60.4178	57.9191	57.9382	60.0759	63.9151	58.3339	53.677	58.0248	55.6286	51.4994	60.482	48.5425	59.4945	64.3416
ENSG00000108433	O14653	9570	GOSR2	Golgi SNAP receptor complex member 2 OS=Homo sapiens (Human) OX=9606 GN=GOSR2 PE=1 SV=2 source=Uniprot,https://www.uniprot.org/uniprot/O14653	24.8	103.941	99.8403	129.849	122.924	105.015	133.458	113.627	132.466	122.659	127.088	118.366	127.945	164.567	143.116	157.106	133.138	128.158	158.739	145.163	140.835	146.046	116.302	134.687	148.596
ENSG00000136827	O14656	1861	TOR1A	Torsin-1A OS=Homo sapiens (Human) OX=9606 GN=TOR1A PE=1 SV=1 source=Uniprot,https://www.uniprot.org/uniprot/O14656	37.8	69.8543	72.0907	79.5263	65.5821	69.286	54.3903	60.3615	64.9518	67.1157	66.0046	69.7269	63.1973	66.6526	74.6281	67.9277	69.5113	77.0762	65.4281	66.2375	72.7082	71.7118	61.7967	75.8922	65.5184
ENSG00000136816	O14657	27348	TOR1B	Torsin-1B OS=Homo sapiens (Human) OX=9606 GN=TOR1B PE=1 SV=2 source=Uniprot,https://www.uniprot.org/uniprot/O14657	38	37.9479	31.5351	37.0966	31.6999	37.5551	29.4741	35.4495	36.368	33.0361	36.6097	32.5174	31.0717	28.1843	27.8767	24.8489	26.0885	27.9969	25.4253	29.7079	31.0861	34.5173	33.863	28.9002	26.2329
ENSG00000124222	O14662	8675	STX16	Syntaxin-16 OS=Homo sapiens (Human) OX=9606 GN=STX16 PE=1 SV=3 source=Uniprot,https://www.uniprot.org/uniprot/O14662	37	31.7886	33.7016	28.0914	23.8076	24.808	20.3721	33.1584	23.5483	28.1415	30.9641	31.4861	27.9111	27.3149	45.5733	30.7415	23.9436	31.1509	23.2091	25.6514	31.9726	31.0904	38.5251	39.043	35.6248
ENSG00000137845	O14672	102	ADAM10	Disintegrin and metalloproteinase domain-containing protein 10 OS=Homo sapiens (Human) OX=9606 GN=ADAM10 PE=1 SV=1 source=Uniprot,https://www.uniprot.org/uniprot/O14672	84.1	40.0819	28.4461	31.365	37.9801	27.8354	28.3846	37.9454	28.9475	34.9364	33.9517	29.5855	34.4131	31.4565	25.3248	23.3683	24.8912	24.8449	26.9066	23.6166	24.0917	27.4379	25.7649	24.9194	27.4527
ENSG00000119688	O14678	5826	ABCD4	ATP-binding cassette sub-family D member 4 OS=Homo sapiens (Human) OX=9606 GN=ABCD4 PE=1 SV=1 source=Uniprot,https://www.uniprot.org/uniprot/O14678	68.6	11.137	13.4022	11.7992	9.82502	14.2263	8.50335	11.7455	8.88139	10.3675	8.63806	7.33837	10.5729	8.77205	6.70799	7.83464	7.2272	8.95566	7.91729	7.74785	8.34761	10.1902	7.51052	7.33867	7.74244
ENSG00000149547	O14681	9538	EI24	Etoposide-induced protein 2.4 homolog OS=Homo sapiens (Human) OX=9606 GN=EI24 PE=1 SV=4 source=Uniprot,https://www.uniprot.org/uniprot/O14681	38.9	46.6668	51.7059	52.1878	55.6759	47.2321	46.4249	98.1209	43.6237	37.9413	54.7341	48.0356	40.5092	90.53	44.6336	46.6631	59.0608	55.8845	48.1462	66.2208	52.7031	52.1367	58.2612	51.6906	48.6918
ENSG00000171617	O14682	8507	ENC1	Ectoderm-neural cortex protein 1 OS=Homo sapiens (Human) OX=9606 GN=ENC1 PE=1 SV=2 source=Uniprot,https://www.uniprot.org/uniprot/O14682	66.1	31.0129	24.4043	25.7183	34.1221	32.3117	36.1353	37.7583	43.073	37.569	39.6479	35.2482	34.9039	28.2766	35.881	30.3426	29.6045	25.9462	23.8129	36.0647	38.5434	36.4103	134.408	78.9935	92.1993
ENSG00000175274	O14683	9537	TP53I11	Tumor protein p53-inducible protein 11 OS=Homo sapiens (Human) OX=9606 GN=TP53I11 PE=1 SV=2 source=Uniprot,https://www.uniprot.org/uniprot/O14683	21	354.858	278.167	336.22	288.793	321.276	175.221	318.472	207.65	233.109	285.873	272.034	181.777	569.216	416.825	379.965	681.643	1173.46	633.163	532.138	516.826	494.904	348.098	287.867	262.631
ENSG00000148344	O14684	9536	PTGES	Prostaglandin E synthase OS=Homo sapiens (Human) OX=9606 GN=PTGES PE=1 SV=2 source=Uniprot,https://www.uniprot.org/uniprot/O14684	17.1	18.9868	24.6498	18.2614	14.299	21.5688	9.17626	11.8112	17.3489	12.0458	10.2729	10.9621	7.90402	17.1635	13.4493	9.00851	25.7821	37.052	20.8254	40.2445	28.6015	25.5952	22.6109	18.2073	19.1939
ENSG00000167548	O14686	8085	KMT2D	Histone-lysine N-methyltransferase 2D OS=Homo sapiens (Human) OX=9606 GN=KMT2D PE=1 SV=2 source=Uniprot,https://www.uniprot.org/uniprot/O14686	593	6.99545	7.07439	7.55813	7.0449	7.15503	6.07372	6.93505	5.96043	6.51874	7.27038	6.14411	6.50543	7.89434	7.07202	6.22742	6.85162	7.15636	5.40224	7.91143	6.88877	6.77824	7.12928	6.04486	6.24371
ENSG00000120868	O14727	317	APAF1	Apoptotic protease-activating factor 1 OS=Homo sapiens (Human) OX=9606 GN=APAF1 PE=1 SV=2 source=Uniprot,https://www.uniprot.org/uniprot/O14727	141.7	30.2675	46.1429	29.3175	40.8031	37.1931	40.4738	40.5861	40.1246	44.1216	47.2408	46.7319	49.8183	31.5809	34.5687	39.6017	29.8417	27.9722	33.0848	25.5586	27.7375	28.0494	21.8828	28.3848	33.4608
ENSG00000076984	O14733	5609	MAP2K7	Dual specificity mitogen-activated protein kinase kinase 7 OS=Homo sapiens (Human) OX=9606 GN=MAP2K7 PE=1 SV=2 source=Uniprot,https://www.uniprot.org/uniprot/O14733	47.5	71.281	46.056	46.4843	44.6833	48.2936	39.6275	55.0338	31.515	37.5208	36.8644	33.4477	39.5273	36.096	33.8039	44.3574	28.8181	31.1691	37.2518	31.9665	34.6832	34.5648	30.8522	31.688	37.6219
ENSG00000101473	O14734	10005	ACOT8	Acyl-coenzyme A thioesterase 8 OS=Homo sapiens (Human) OX=9606 GN=ACOT8 PE=1 SV=1 source=Uniprot,https://www.uniprot.org/uniprot/O14734	35.9	46.7422	70.548	61.428	34.0512	43.2331	31.0504	42.3017	38.6043	32.6087	35.0446	40.5592	30.4014	45.8142	45.408	38.5064	34.685	45.1619	35.5748	37.0717	53.6247	41.9757	55.7342	37.8197	31.6399
ENSG00000103502	O14735	10423	CDIPT	CDP-diacylglycerol--inositol 3-phosphatidyltransferase OS=Homo sapiens (Human) OX=9606 GN=CDIPT PE=1 SV=1 source=Uniprot,https://www.uniprot.org/uniprot/O14735	23.5	49.1525	27.2075	37.4653	23.3223	30.567	27.6342	42.6761	32.6481	31.7899	28.5655	49.1447	31.0901	50.5482	61.8234	28.9696	24.0947	44.6112	36.9704	39.5897	27.453	41.9934	64.6716	45.2338	36.3151
ENSG00000105185	O14737	9141	PDCD5	Programmed cell death protein 5 OS=Homo sapiens (Human) OX=9606 GN=PDCD5 PE=1 SV=3 source=Uniprot,https://www.uniprot.org/uniprot/O14737	14.3	508.284	543.338	510.845	514.527	474.065	505.313	488.802	441.416	474.354	463.836	446.274	448.65	481.478	465.466	490.103	544.363	510.222	516.543	575.892	498.822	491.956	454.052	442.187	442.493
ENSG00000100462	O14744	10419	PRMT5	Protein arginine N-methyltransferase 5 OS=Homo sapiens (Human) OX=9606 GN=PRMT5 PE=1 SV=4 source=Uniprot,https://www.uniprot.org/uniprot/O14744	72.6	281.993	259.468	272.286	191.044	213.194	184.737	232.643	205.765	202.645	218.917	208.212	208.522	219.173	249.38	220.701	209.077	230.226	221.982	252.597	235.211	237.346	261.674	205.058	192.77
ENSG00000109062	O14745	9368	SLC9A3R1	Na(+)/H(+) exchange regulatory cofactor NHE-RF1 OS=Homo sapiens (Human) OX=9606 GN=SLC9A3R1 PE=1 SV=4 source=Uniprot,https://www.uniprot.org/uniprot/O14745	38.8	137.872	240.679	180.002	133.562	156.731	126.412	160.283	150.169	145.613	185.833	169.844	171.594	76.4634	77.8854	67.4821	87.7207	70.2654	62.604	90.1524	85.8043	80.7198	102.896	109.384	93.1743
ENSG00000149554	O14757	1111	CHEK1	Serine/threonine-protein kinase Chk1 OS=Homo sapiens (Human) OX=9606 GN=CHEK1 PE=1 SV=2 source=Uniprot,https://www.uniprot.org/uniprot/O14757	54.4	57.1329	55.0089	61.4955	49.4624	44.4865	45.5858	40.219	39.1045	44.2043	45.4893	41.2158	41.8174	15.07	15.1304	19.0252	14.1192	13.9369	14.9317	14.0317	16.1462	18.5681	13.6602	15.5524	16.5773
ENSG00000166340	O14773	1200	TPP1	Tripeptidyl-peptidase 1 OS=Homo sapiens (Human) OX=9606 GN=TPP1 PE=1 SV=2 source=Uniprot,https://www.uniprot.org/uniprot/O14773	61.2	69.5126	109.251	91.6478	74.9971	76.3287	92.0921	87.4281	76.2414	87.627	85.1153	101.955	98.9745	69.5181	100.112	96.4079	86.0809	73.1578	88.4481	96.3551	70.6935	85.952	97.9798	106.911	107.347
ENSG00000113649	O14776	10915	TCERG1	Transcription elongation regulator 1 OS=Homo sapiens (Human) OX=9606 GN=TCERG1 PE=1 SV=2 source=Uniprot,https://www.uniprot.org/uniprot/O14776	123.8	465.273	367.919	417.83	457.938	409.503	441.587	422.964	446.672	444.707	409.756	428.1	425.888	450.148	499.711	464.6	433.089	419.459	412.92	423.697	416.395	445.632	450.065	442.021	448.716
ENSG00000080986	O14777	10403	NDC80	Kinetochore protein NDC80 homolog OS=Homo sapiens (Human) OX=9606 GN=NDC80 PE=1 SV=1 source=Uniprot,https://www.uniprot.org/uniprot/O14777	73.9	108.811	122.368	130.277	93.4879	115.081	86.9073	105.73	90.8692	104.735	113.574	111.473	97.772	29.5994	20.4265	28.4264	26.7579	24.5811	25.7939	29.8877	25.9976	28.9391	35.5663	24.1673	25.1589
ENSG00000105576	O14787	30000	TNPO2	Transportin-2 OS=Homo sapiens (Human) OX=9606 GN=TNPO2 PE=1 SV=3 source=Uniprot,https://www.uniprot.org/uniprot/O14787	101.3	76.7543	73.9634	86.0854	89.7301	90.0589	98.582	93.5823	100.454	96.444	103.271	94.222	100.771	110.762	108.784	127.957	105.927	100.408	110.742	127.569	108.05	109.067	114.152	113.927	123.364
ENSG00000198722	O14795	10497	UNC13B	Protein unc-13 homolog B OS=Homo sapiens (Human) OX=9606 GN=UNC13B PE=1 SV=2 source=Uniprot,https://www.uniprot.org/uniprot/O14795	180.6	18.7031	20.433	17.336	17.1627	18.139	19.4994	19.4593	16.8307	18.5684	16.5046	17.7364	16.9836	20.7846	21.1106	21.182	18.6219	21.0734	19.3668	16.5201	20.1674	16.7448	21.6873	19.0775	18.486
ENSG00000148606	O14802	11128	POLR3A	DNA-directed RNA polymerase III subunit RPC1 OS=Homo sapiens (Human) OX=9606 GN=POLR3A PE=1 SV=2 source=Uniprot,https://www.uniprot.org/uniprot/O14802	155.5	42.6078	40.9399	41.4485	37.2242	40.1474	34.7102	38.972	36.9281	36.6297	37.333	36.9515	37.9534	35.5423	31.315	32.1095	33.5838	36.6595	36.2003	42.7269	42.9009	42.0191	41.1281	39.6568	41.5148
ENSG00000101182	O14818	5688	PSMA7	Proteasome subunit alpha type-7 OS=Homo sapiens (Human) OX=9606 GN=PSMA7 PE=1 SV=1 source=Uniprot,https://www.uniprot.org/uniprot/O14818	27.9	609.892	653.672	693.59	769.486	608.284	741.747	642.691	707.099	676.566	682.704	697.606	714.093	741.873	818.183	818.258	793.536	666.857	736.056	766.582	648.734	713.03	671.201	701.286	728.316
ENSG00000116521	O14828	10067	SCAMP3	Secretory carrier-associated membrane protein 3 OS=Homo sapiens (Human) OX=9606 GN=SCAMP3 PE=1 SV=3 source=Uniprot,https://www.uniprot.org/uniprot/O14828	38.3	172.843	170.342	143.418	122.266	141.008	120.354	163.552	120.231	141.937	132.027	128.865	144.69	147.493	120.485	119.425	127.797	169.729	166.211	140.182	182.915	160.733	193.143	130.431	134.724
ENSG00000178814	O14841	26873	OPLAH	5-oxoprolinase OS=Homo sapiens (Human) OX=9606 GN=OPLAH PE=1 SV=3 source=Uniprot,https://www.uniprot.org/uniprot/O14841	137.4	15.3022	12.7588	11.6445	14.7729	20.2059	22.024	15.0754	15.2542	18.5904	13.4814	13.1263	17.302	11.6622	12.3202	11.8499	12.6759	19.2392	17.374	13.035	15.0302	13.5472	10.7917	12.8869	14.568
ENSG00000156273	O14867	571	BACH1	Transcription regulator protein BACH1 OS=Homo sapiens (Human) OX=9606 GN=BACH1 PE=1 SV=2 source=Uniprot,https://www.uniprot.org/uniprot/O14867	81.9	20.8999	21.2132	10.4821	8.73246	13.4597	8.84277	10.7314	7.43861	8.59145	9.69713	6.83282	8.51006	11.0343	12.6768	10.5907	8.34548	12.5403	9.52741	7.3227	11.3619	11.4264	13.9183	7.50656	10.0141
ENSG00000103507	O14874	10295	BCKDK	[3-methyl-2-oxobutanoate dehydrogenase [lipoamide]] kinase, mitochondrial OS=Homo sapiens (Human) OX=9606 GN=BCKDK PE=1 SV=2 source=Uniprot,https://www.uniprot.org/uniprot/O14874	46.3	31.8269	30.1021	30.1316	19.8469	30.4262	18.114	28.3202	31.5894	30.1076	29.5857	26.7929	27.3076	20.2971	26.1536	18.6731	19.6142	30.5796	22.3797	30.8044	31.1241	31.7463	28.281	31.3552	26.479
ENSG00000143198	O14880	4259	MGST3	Microsomal glutathione S-transferase 3 OS=Homo sapiens (Human) OX=9606 GN=MGST3 PE=1 SV=1 source=Uniprot,https://www.uniprot.org/uniprot/O14880	16.5	136.141	183.919	178.966	180.868	271.842	134.596	172.887	174.285	156.268	162.202	179.592	136.645	225.972	189.496	174.524	282.374	304.431	203.313	282.383	277.986	247.298	253.283	229.861	209.639
ENSG00000092208	O14893	8487	GEMIN2	Gem-associated protein 2 OS=Homo sapiens (Human) OX=9606 GN=GEMIN2 PE=1 SV=1 source=Uniprot,https://www.uniprot.org/uniprot/O14893	31.6	82.0339	30.4115	21.3384	26.9845	36.3898	45.5228	49.8199	44.2888	43.6876	30.4577	43.7195	42.1856	43.0296	39.0768	49.1413	28.216	41.6303	55.9008	34.4965	49.1876	46.8191	125.107	40.2557	49.2155
ENSG00000117595	O14896	3664	IRF6			4.23166	4.69517	4.73651	4.98272	5.03335	4.0817	4.16135	4.00285	4.39028	3.99415	4.40495	4.2419	5.02009	4.09978	3.69553	4.98046	4.73059	3.52215	4.09338	4.49426	3.87926	4.33122	4.23775	3.90312
ENSG00000213977	O14907	30851	TAX1BP3	Tax1-binding protein 3 OS=Homo sapiens (Human) OX=9606 GN=TAX1BP3 PE=1 SV=2 source=Uniprot,https://www.uniprot.org/uniprot/O14907	13.7	87.2307	92.5483	91.0187	85.1918	73.9313	73.3994	73.5182	63.51	74.4707	74.8742	71.64	67.2342	81.7395	77.4486	77.4003	67.0039	76.203	65.1921	73.777	73.5047	83.858	73.853	62.9436	67.6902
ENSG00000123159	O14908	10755	GIPC1	PDZ domain-containing protein GIPC1 OS=Homo sapiens (Human) OX=9606 GN=GIPC1 PE=1 SV=2 source=Uniprot,https://www.uniprot.org/uniprot/O14908	36	107.359	129.15	116.521	102.933	109.219	95.9752	111.891	104.731	100.669	110.901	100.744	99.5167	105.834	102.711	115.65	103.741	120.849	108.357	110.147	110.973	112.461	96.1256	110.021	92.4246
ENSG00000111052	O14910	8825	LIN7A	Protein lin-7 homolog A OS=Homo sapiens (Human) OX=9606 GN=LIN7A PE=1 SV=2 source=Uniprot,https://www.uniprot.org/uniprot/O14910	26	31.9161	29.4763	25.175	10.956	16.4884	13.8359	18.3022	12.9307	16.2731	13.7168	11.962	14.8025	17.4973	20.4246	19.2089	16.5769	22.2696	18.5878	21.7726	15.7559	17.3845	19.1887	14.1317	13.1895
ENSG00000104365	O14920	3551	IKBKB	Inhibitor of nuclear factor kappa-B kinase subunit beta OS=Homo sapiens (Human) OX=9606 GN=IKBKB PE=1 SV=1 source=Uniprot,https://www.uniprot.org/uniprot/O14920	86.5	26.329	22.9649	20.7136	12.6673	22.6659	18.4783	16.7796	19.4413	20.7069	22.7602	19.416	22.0236	13.6855	11.2079	12.7891	11.7872	13.8706	13.095	10.5212	14.5656	11.6211	15.0024	14.8004	11.1209
ENSG00000159788	O14924	6002	RGS12	Regulator of G-protein signaling 12 OS=Homo sapiens (Human) OX=9606 GN=RGS12 PE=1 SV=1 source=Uniprot,https://www.uniprot.org/uniprot/O14924	156.3	19.9254	21.8111	21.0262	16.0916	19.955	20.3282	19.057	17.8583	21.9643	19.1221	21.0703	22.2136	19.5858	19.3977	22.9632	18.4078	21.2935	20.7694	17.896	22.1695	23.0096	29.2187	22.6513	24.8003
ENSG00000265354	O14925	100287932	TIMM23	Mitochondrial import inner membrane translocase subunit Tim23 OS=Homo sapiens (Human) OX=9606 GN=TIMM23 PE=1 SV=1 source=Uniprot,https://www.uniprot.org/uniprot/O14925	21.9	99.6728	109.269	97.1674	94.1318	90.2614	94.4274	74.5556	75.2931	73.288	76.5102	74.2139	66.512	109.041	96.374	92.7952	141.265	117.827	101.947	140.147	126.618	114.889	141.477	97.3549	96.9395
ENSG00000128708	O14929	8520	HAT1	Histone acetyltransferase type B catalytic subunit OS=Homo sapiens (Human) OX=9606 GN=HAT1 PE=1 SV=1 source=Uniprot,https://www.uniprot.org/uniprot/O14929	49.5	390.138	341.125	383.957	482.237	432.62	427.956	435.147	364.407	425.559	538.661	506.65	449.472	179.469	146.047	188.775	176.504	159.705	172.446	171.903	172.211	169.545	164.492	151.578	153.528
ENSG00000156587	O14933	9246	UBE2L6	Ubiquitin/ISG15-conjugating enzyme E2 L6 OS=Homo sapiens (Human) OX=9606 GN=UBE2L6 PE=1 SV=4 source=Uniprot,https://www.uniprot.org/uniprot/O14933	17.8	66.0102	67.8908	64.0011	60.5933	69.8275	55.5401	67.0836	62.61	57.6172	75.0596	68.8985	68.0008	59.748	50.6111	54.6444	70.2004	79.0546	61.6581	54.8772	58.9898	58.4677	49.1704	51.4326	51.6729
ENSG00000147044	O14936	8573	CASK	Peripheral plasma membrane protein CASK OS=Homo sapiens (Human) OX=9606 GN=CASK PE=1 SV=3 source=Uniprot,https://www.uniprot.org/uniprot/O14936	105.1	96.3557	98.2894	98.0121	103.26	83.3013	90.4418	112.33	110.291	110.82	137.604	141.177	117.672	132.915	131.556	127.769	122.148	103.448	105.886	139.873	109.65	133.123	154.999	147.402	143.982
ENSG00000164405	O14949	27089	UQCRQ	Cytochrome b-c1 complex subunit 8 OS=Homo sapiens (Human) OX=9606 GN=UQCRQ PE=1 SV=4 source=Uniprot,https://www.uniprot.org/uniprot/O14949	9.9	362.463	332.933	377.352	396.631	458.071	382.839	377.06	280.059	327.846	338.61	340.817	334.737	417.052	346.782	367.735	527.844	599.875	499.476	540.657	484.576	457.235	440.857	447.297	346.587
ENSG00000118680	O14950	103910	MYL12B	Myosin regulatory light chain 12B OS=Homo sapiens (Human) OX=9606 GN=MYL12B PE=1 SV=2 source=Uniprot,https://www.uniprot.org/uniprot/O14950	19.8	382.849	373.401	405.516	263.195	341.519	281.119	306.065	244.797	275.527	272.778	280.114	283.267	267.654	259.647	278.957	241.279	281.705	234.566	231.752	279.038	263.434	380.647	267.191	267.048
ENSG00000185359	O14964	9146	HGS	Hepatocyte growth factor-regulated tyrosine kinase substrate OS=Homo sapiens (Human) OX=9606 GN=HGS PE=1 SV=1 source=Uniprot,https://www.uniprot.org/uniprot/O14964	86.1	263.433	303.959	268.307	311.333	286.328	267.557	313.397	311.733	315.587	327.129	316.993	311.651	347.017	358.851	350.222	364.699	346.456	302.876	370.902	352.48	368.467	384.244	375.263	378.519
ENSG00000117280	O14966	8934	RAB29	Ras-related protein Rab-7L1 OS=Homo sapiens (Human) OX=9606 GN=RAB29 PE=1 SV=1 source=Uniprot,https://www.uniprot.org/uniprot/O14966	23.1	27.3291	28.4108	35.0104	37.4173	36.6708	31.3964	32.5638	39.8273	31.8858	32.0157	29.8847	29.8043	15.2164	14.1212	20.7602	21.2802	21.8405	20.2492	31.4087	29.2715	28.7526	31.0628	30.8466	28.7559
ENSG00000153132	O14967	1047	CLGN	Calmegin OS=Homo sapiens (Human) OX=9606 GN=CLGN PE=1 SV=1 source=Uniprot,https://www.uniprot.org/uniprot/O14967	70	128.114	175.785	151.902	124.198	117.748	122.489	162.902	90.6243	145.171	104.746	153.529	161.191	153.761	114.229	128.237	109.983	99.3026	101.575	71.6378	88.7919	91.0616	57.0945	77.8803	89.8972
ENSG00000157538	O14972	10311	VPS26C	Vacuolar protein sorting-associated protein 26C OS=Homo sapiens (Human) OX=9606 GN=VPS26C PE=1 SV=1 source=Uniprot,https://www.uniprot.org/uniprot/O14972	33	57.0073	54.7558	63.3134	45.6094	53.2579	31.2302	52.4868	43.1824	44.8791	50.5953	42.4418	37.4428	39.8071	40.5122	28.6786	37.1534	44.9761	33.99	45.8352	48.3461	47.8546	56.4323	42.6621	36.4674
ENSG00000058272	O14974	4659	PPP1R12A	Protein phosphatase 1 regulatory subunit 12A OS=Homo sapiens (Human) OX=9606 GN=PPP1R12A PE=1 SV=1 source=Uniprot,https://www.uniprot.org/uniprot/O14974	115.2	151.621	148.783	122.378	132.846	126.517	129.229	141.035	133.017	128.782	132.914	131.71	128.499	118.584	110.46	104.38	120.279	119.58	119.964	133.067	125.268	123.733	135.652	123.135	116.426
ENSG00000178950	O14976	2580	GAK	Cyclin-G-associated kinase OS=Homo sapiens (Human) OX=9606 GN=GAK PE=1 SV=2 source=Uniprot,https://www.uniprot.org/uniprot/O14976	143.1	41.1871	43.321	43.3721	50.3182	42.2522	38.9461	48.4968	44.2836	46.0171	53.6973	51.3299	47.3102	43.6013	42.3053	41.2974	48.1178	41.7936	36.1256	44.2374	39.4106	44.2685	45.7677	46.9336	44.5352
ENSG00000152795	O14979	9987	HNRNPDL	Heterogeneous nuclear ribonucleoprotein D-like OS=Homo sapiens (Human) OX=9606 GN=HNRNPDL PE=1 SV=3 source=Uniprot,https://www.uniprot.org/uniprot/O14979	46.4	707.002	712.686	805.623	893.816	737.507	1001.04	811.245	930.569	988.761	875.247	976.553	983.54	1025.86	1261.85	1253.46	1005.45	830.761	1084.72	1040.57	944.204	1109.64	900.392	1002.85	1142.46
ENSG00000082898	O14980	7514	XPO1	Exportin-1 OS=Homo sapiens (Human) OX=9606 GN=XPO1 PE=1 SV=1 source=Uniprot,https://www.uniprot.org/uniprot/O14980	123.3	515.141	466.992	515.472	407.331	494.158	441.055	455.982	423.387	448.032	458.039	459.866	456.832	340.518	437.897	435.559	370.265	423.71	381.366	375.923	412.794	405.935	460.465	403.06	410.205
ENSG00000095564	O14981	9044	BTAF1	TATA-binding protein-associated factor 172 OS=Homo sapiens (Human) OX=9606 GN=BTAF1 PE=1 SV=2 source=Uniprot,https://www.uniprot.org/uniprot/O14981	206.8	59.6432	65.6292	67.3672	58.7953	73.7048	55.0777	59.1571	60.9884	60.8132	60.6643	59.3294	56.5345	57.689	59.0232	52.4852	56.8605	68.2511	55.267	58.88	65.7539	64.3037	60.5103	53.9312	55.7131
ENSG00000185666	O14994	8224	SYN3	Synapsin-3 OS=Homo sapiens (Human) OX=9606 GN=SYN3 PE=1 SV=2 source=Uniprot,https://www.uniprot.org/uniprot/O14994	63.3	20.1514	23.1577	16.728	21.3846	25.8819	18.6827	21.0468	36.228	19.466	24.6684	31.9761	18.2003	132.323	106.721	122.134	141.962	158.859	125.94	98.1681	53.4208	39.4872	26.8483	36.666	30.361
ENSG00000180357	O15014	23060	ZNF609	Zinc finger protein 609 OS=Homo sapiens (Human) OX=9606 GN=ZNF609 PE=1 SV=2 source=Uniprot,https://www.uniprot.org/uniprot/O15014	151.1	102.451	102.369	104.286	113.684	118.469	99.4378	87.2307	94.8557	91.11	96.244	88.5384	85.9515	97.352	81.8081	76.741	86.6494	96.0239	79.0974	88.65	95.5498	92.8399	76.7671	82.6807	85.1905
ENSG00000167395	O15015	9726	ZNF646	Zinc finger protein 646 OS=Homo sapiens (Human) OX=9606 GN=ZNF646 PE=1 SV=2 source=Uniprot,https://www.uniprot.org/uniprot/O15015	200.7	8.75401	7.50612	4.92776	13.1642	8.16845	11.9157	10.1816	11.7379	11.6401	12.1277	12.9964	11.9674	10.5073	11.0336	10.1609	10.6648	8.09367	10.8341	9.46087	9.51119	10.5419	7.5015	11.0032	13.9662
ENSG00000173898	O15020	6712	SPTBN2	Spectrin beta chain, non-erythrocytic 2 OS=Homo sapiens (Human) OX=9606 GN=SPTBN2 PE=1 SV=3 source=Uniprot,https://www.uniprot.org/uniprot/O15020	271.2	145.082	131.291	139.763	138.241	134.503	140.254	132.734	129.257	136.763	131.294	131.162	129.709	225.628	223.614	218.11	176.482	181.306	157.668	176.234	159.597	166.047	144.009	127.083	138.707
ENSG00000148396	O15027	9919	SEC16A	Protein transport protein Sec16A OS=Homo sapiens (Human) OX=9606 GN=SEC16A PE=1 SV=4 source=Uniprot,https://www.uniprot.org/uniprot/O15027	251.7	104.364	115.967	110.905	102.27	110.79	95.1654	114.432	109.543	112.688	114.314	108.159	108.282	113.497	117.759	103.004	116.671	134.3	118.149	123.609	122.32	129.651	129.27	113.778	113.475
ENSG00000196576	O15031	23654	PLXNB2	Plexin-B2 OS=Homo sapiens (Human) OX=9606 GN=PLXNB2 PE=1 SV=3 source=Uniprot,https://www.uniprot.org/uniprot/O15031	205	69.9735	70.0786	73.9816	64.2937	60.9156	60.3256	71.8435	61.4013	62.7094	63.6488	63.3389	66.2267	40.8945	50.9355	51.6667	38.9024	43.0833	43.6866	38.2108	43.2778	48.7686	49.7771	48.9856	50.3869
ENSG00000196663	O15040	9895	TECPR2	Tectonin beta-propeller repeat-containing protein 2 OS=Homo sapiens (Human) OX=9606 GN=TECPR2 PE=1 SV=4 source=Uniprot,https://www.uniprot.org/uniprot/O15040	153.8	18.0068	24.6959	24.9554	18.8627	21.7109	21.3637	17.9992	21.2761	23.1152	23.3228	22.4043	23.1205	19.4261	24.3929	23.4515	20.6807	21.9683	21.1445	17.4708	17.9079	20.4967	15.5677	18.7795	18.7238
ENSG00000163714	O15042	23350	U2SURP	U2 snRNP-associated SURP motif-containing protein OS=Homo sapiens (Human) OX=9606 GN=U2SURP PE=1 SV=2 source=Uniprot,https://www.uniprot.org/uniprot/O15042	118.2	361.844	390.754	372.915	412.795	401.443	420.001	369.942	374.702	378.877	359.072	354.125	360.579	385.777	379.728	390.403	391.3	346.714	349.599	366.287	376.874	363.545	330.323	359.293	368.63
ENSG00000099381	O15047	9739	SETD1A	Histone-lysine N-methyltransferase SETD1A OS=Homo sapiens (Human) OX=9606 GN=SETD1A PE=1 SV=3 source=Uniprot,https://www.uniprot.org/uniprot/O15047	185.9	42.5015	40.1772	45.6601	37.8315	39.6473	35.2861	40.7594	43.9316	40.1539	42.0659	44.5453	39.0921	39.9819	44.3023	35.2399	37.6232	37.5812	32.4056	38.9944	39.3943	45.2583	42.2546	43.3778	40.4815
ENSG00000132510	O15054	23135	KDM6B	Lysine-specific demethylase 6B OS=Homo sapiens (Human) OX=9606 GN=KDM6B PE=1 SV=4 source=Uniprot,https://www.uniprot.org/uniprot/O15054	176.5	6.29409	3.5674	1.68751	4.72814	4.44282	3.42173	4.72596	5.22931	3.41911	4.90712	4.93561	3.43377	3.93022	4.75056	3.25859	3.97401	4.34612	3.21304	3.98613	5.43648	5.10231	5.2032	4.64413	5.22012
ENSG00000182253	O15061	23336	SYNM	Synemin OS=Homo sapiens (Human) OX=9606 GN=SYNM PE=1 SV=2 source=Uniprot,https://www.uniprot.org/uniprot/O15061	172.7	2.51497	2.40948	2.57957	1.51996	3.09643	1.34545	4.43089	3.08589	3.1947	4.23435	1.8264	3.29476	1.48036	1.14527	1.15127	1.3618	1.49355	0.7213	1.48444	1.99507	1.09168	2.14663	1.4863	1.19737
ENSG00000168795	O15062	9925	ZBTB5	Zinc finger and BTB domain-containing protein 5 OS=Homo sapiens (Human) OX=9606 GN=ZBTB5 PE=1 SV=1 source=Uniprot,https://www.uniprot.org/uniprot/O15062	74.2	12.0371	17.8236	11.2902	15.3781	16.5601	13.6184	14.8189	13.6795	12.7703	13.8693	13.085	14.2483	12.9322	11.2781	10.5043	14.1646	12.0426	12.3959	15.4146	15.8957	16.9005	14.8801	12.0574	17.7099
ENSG00000166398	O15063	9710	GARRE1	Uncharacterized protein KIAA0355 OS=Homo sapiens (Human) OX=9606 GN=KIAA0355 PE=1 SV=2 source=Uniprot,https://www.uniprot.org/uniprot/O15063	115.9	3.73464	3.77221	3.42768	2.84967	3.87176	2.20784	3.47838	2.70152	3.07181	3.53272	2.17777	2.52869	2.98316	2.58226	2.25744	2.2362	2.09873	1.90761	2.17447	2.34134	2.71425	3.0795	2.03613	2.61395
ENSG00000101350	O15066	9371	KIF3B	Kinesin-like protein KIF3B OS=Homo sapiens (Human) OX=9606 GN=KIF3B PE=1 SV=1 source=Uniprot,https://www.uniprot.org/uniprot/O15066	85.1	39.4231	46.9368	40.7743	47.3153	36.9806	45.419	45.8071	49.3501	49.6997	52.9133	58.2143	51.5306	75.5945	78.3392	74.5457	84.7776	72.498	76.452	75.2725	55.5723	60.5672	59.9663	65.7245	60.7893
ENSG00000178921	O15067	5198	PFAS	Phosphoribosylformylglycinamidine synthase OS=Homo sapiens (Human) OX=9606 GN=PFAS PE=1 SV=4 source=Uniprot,https://www.uniprot.org/uniprot/O15067	144.6	215.929	225.71	224.712	188.47	192.09	167.01	178.54	165.079	167.503	167.007	155.469	164.243	151.485	139.058	153.928	135.71	145.143	135.975	140.254	144.722	144.031	143.101	132.869	131.87
ENSG00000126217	O15068	23263	MCF2L	Guanine nucleotide exchange factor DBS OS=Homo sapiens (Human) OX=9606 GN=MCF2L PE=1 SV=2 source=Uniprot,https://www.uniprot.org/uniprot/O15068	128	13.1445	17.7716	14.8743	12.8563	13.6742	14.4588	13.1128	12.7041	13.7669	12.3532	12.7575	15.2983	16.8124	15.2737	18.6265	16.7139	17.9456	16.139	15.3237	14.502	18.68	16.1913	13.4701	15.7564
ENSG00000136274	O15069	23148	NACAD	NAC-alpha domain-containing protein 1 OS=Homo sapiens (Human) OX=9606 GN=NACAD PE=1 SV=3 source=Uniprot,https://www.uniprot.org/uniprot/O15069	161	66.4123	73.061	72.68	75.4069	69.7176	79.691	78.3842	69.5793	68.7385	74.8402	66.1918	62.7389	160.241	173.839	123.96	133.181	148.401	110.982	135.587	122.139	133.029	105.827	89.8713	98.4457
ENSG00000133083	O15075	9201	DCLK1	Serine/threonine-protein kinase DCLK1 OS=Homo sapiens (Human) OX=9606 GN=DCLK1 PE=1 SV=2 source=Uniprot,https://www.uniprot.org/uniprot/O15075	82.2	199.164	189.917	197.704	261.343	224.158	296.552	359.577	270.978	352.329	316.765	413.455	410.801	525.078	610.143	565.691	419.422	417.371	369.368	537.382	412.644	424.108	411.494	380.552	387.56
ENSG00000198707	O15078	80184	CEP290	Centrosomal protein of 290 kDa OS=Homo sapiens (Human) OX=9606 GN=CEP290 PE=1 SV=2 source=Uniprot,https://www.uniprot.org/uniprot/O15078	290.2	4.8876	13.1973	5.30703	2.33955	7.38165	1.42607	3.27219	0.730208	1.57776	2.31446	1.09666	1.57814	2.17175	1.12913	1.35375	1.84531	3.63605	1.4849	2.08574	3.78485	3.41666	4.08064	1.09471	1.54328
ENSG00000187672	O15083	26059	ERC2	ERC protein 2 OS=Homo sapiens (Human) OX=9606 GN=ERC2 PE=1 SV=3 source=Uniprot,https://www.uniprot.org/uniprot/O15083	110.5	10.9984	10.5297	9.58308	10.1269	10.0272	9.25503	9.92217	9.37308	11.2539	9.64982	11.3199	12.2313	13.7562	11.5582	14.3355	15.8358	13.4357	17.2144	15.6281	13.3211	15.1533	19.0155	16.9053	17.5969
ENSG00000206560	O15084	23243	ANKRD28	Serine/threonine-protein phosphatase 6 regulatory ankyrin repeat subunit A OS=Homo sapiens (Human) OX=9606 GN=ANKRD28 PE=1 SV=5 source=Uniprot,https://www.uniprot.org/uniprot/O15084	112.9	61.6469	71.4322	74.391	55.7649	65.9602	52.9187	58.4257	70.8372	54.7092	59.7075	52.0553	51.5728	61.5318	53.3484	58.8954	68.1793	74.4885	63.3112	66.1118	66.9234	66.7297	63.1279	54.2713	57.1049
ENSG00000132694	O15085	9826	ARHGEF11	Rho guanine nucleotide exchange factor 11 OS=Homo sapiens (Human) OX=9606 GN=ARHGEF11 PE=1 SV=1 source=Uniprot,https://www.uniprot.org/uniprot/O15085	167.6	24.7343	21.329	20.5141	19.015	19.4463	21.6248	21.6539	18.0748	21.764	20.7941	20.8274	23.8464	20.6402	24.4059	29.1178	19.9406	25.0727	26.4598	21.2367	20.7406	26.7838	27.4104	22.5503	25.6602
ENSG00000100890	O15091	9692	PRORP	Mitochondrial ribonuclease P catalytic subunit OS=Homo sapiens (Human) OX=9606 GN=PRORP PE=1 SV=2 source=Uniprot,https://www.uniprot.org/uniprot/O15091	67.3	25.8209	25.2912	29.2619	25.0688	27.7317	23.8818	23.4189	17.5181	22.7291	24.3635	20.4564	23.4312	17.5645	15.127	18.41	22.2529	23.028	19.9747	24.9779	19.0671	19.73	19.9885	19.5239	16.3887
ENSG00000213341	O15111	1147	CHUK	Inhibitor of nuclear factor kappa-B kinase subunit alpha OS=Homo sapiens (Human) OX=9606 GN=CHUK PE=1 SV=2 source=Uniprot,https://www.uniprot.org/uniprot/O15111	84.6	21.757	23.1003	19.8683	21.659	23.834	17.8006	20.7896	24.5346	20.6432	22.8804	29.5127	20.347	19.1852	13.2463	18.4435	20.824	14.4358	17.3656	17.702	15.6947	21.1695	18.2819	14.1108	19.1594
ENSG00000175324	O15116	27257	LSM1	U6 snRNA-associated Sm-like protein LSm1 OS=Homo sapiens (Human) OX=9606 GN=LSM1 PE=1 SV=1 source=Uniprot,https://www.uniprot.org/uniprot/O15116	15.2	130.242	122.126	110.783	80.5232	123.138	99.6282	123.331	96.7563	109.825	118.329	116.118	114.337	52.043	107.548	107.054	89.5484	146.939	121.172	111.241	124.646	127.738	138.092	113.297	107.457
ENSG00000141458	O15118	4864	NPC1	NPC intracellular cholesterol transporter 1 OS=Homo sapiens (Human) OX=9606 GN=NPC1 PE=1 SV=2 source=Uniprot,https://www.uniprot.org/uniprot/O15118	142.1	47.8347	49.1043	53.6266	61.8133	61.873	54.9818	51.1926	52.6267	57.0582	48.7885	51.7174	49.9627	43.9694	41.8258	50.9723	56.9379	50.5844	51.3585	51.9948	49.1011	58.7704	52.4711	51.9773	48.7688
ENSG00000169692	O15120	10555	AGPAT2	1-acyl-sn-glycerol-3-phosphate acyltransferase beta OS=Homo sapiens (Human) OX=9606 GN=AGPAT2 PE=1 SV=1 source=Uniprot,https://www.uniprot.org/uniprot/O15120	30.9	18.2477	21.9395	16.7634	16.0905	19.8577	13.4455	10.5111	11.0844	9.70334	8.92264	9.3752	8.85453	9.0461	3.52212	4.34517	8.27097	8.31826	6.20207	12.1266	9.95359	6.64819	7.89017	7.47599	6.24684
ENSG00000085365	O15126	9522	SCAMP1	Secretory carrier-associated membrane protein 1 OS=Homo sapiens (Human) OX=9606 GN=SCAMP1 PE=1 SV=2 source=Uniprot,https://www.uniprot.org/uniprot/O15126	37.9	221.4	333.411	276.702	194.11	209.696	160.083	188.311	172.053	170.765	183.519	179.225	163.824	319.981	312.43	264.899	326.196	414.628	257.676	304.853	289.646	275.588	259.653	218.661	209.941
ENSG00000140497	O15127	10066	SCAMP2	Secretory carrier-associated membrane protein 2 OS=Homo sapiens (Human) OX=9606 GN=SCAMP2 PE=1 SV=2 source=Uniprot,https://www.uniprot.org/uniprot/O15127	36.6	107.732	111.004	157.849	154.552	126.306	148.619	142.425	159.33	148.473	162.219	168.543	163.041	135.074	134.955	128.643	146.179	134.471	134.795	129.626	102.592	130.192	101.854	136.485	132.406
ENSG00000130429	O15143	10095	ARPC1B	Actin-related protein 2/3 complex subunit 1B OS=Homo sapiens (Human) OX=9606 GN=ARPC1B PE=1 SV=3 source=Uniprot,https://www.uniprot.org/uniprot/O15143	40.9	80.9149	86.8794	66.1816	60.5953	70.5995	51.8304	86.1713	55.7314	68.9758	66.2867	66.7727	69.4849	57.7033	50.9806	41.0324	47.2509	48.6704	32.2262	48.9238	53.3967	51.755	72.3913	73.9682	55.9268
ENSG00000163466	O15144	10109	ARPC2	Actin-related protein 2/3 complex subunit 2 OS=Homo sapiens (Human) OX=9606 GN=ARPC2 PE=1 SV=1 source=Uniprot,https://www.uniprot.org/uniprot/O15144	34.3	545.422	636.773	600.974	494.262	554.293	523.73	634.708	562.043	585.549	540.776	573.981	583.017	648.442	647.915	660.252	640.948	767.457	694.364	727.901	812.26	790.482	980.717	711.48	716.564
ENSG00000111229	O15145	10094	ARPC3	Actin-related protein 2/3 complex subunit 3 OS=Homo sapiens (Human) OX=9606 GN=ARPC3 PE=1 SV=3 source=Uniprot,https://www.uniprot.org/uniprot/O15145	20.5	388.937	400.101	361.857	360.635	333.655	396.756	433.434	352.592	405.786	412.181	414.445	461.367	392.685	440.384	505.298	466.487	462.793	507.934	594.139	512.82	495.072	582.294	524.8	555.516
ENSG00000171453	O15160	9533	POLR1C	DNA-directed RNA polymerases I and III subunit RPAC1 OS=Homo sapiens (Human) OX=9606 GN=POLR1C PE=1 SV=1 source=Uniprot,https://www.uniprot.org/uniprot/O15160	39.2	137.111	133.41	121.367	121.284	123.571	117.592	113.671	111.909	104.997	102.596	101.235	102.897	110.179	84.8474	83.9394	109.931	118.866	106.435	131.29	133.012	110.98	112.541	107.072	104.038
ENSG00000122779	O15164	8805	TRIM24	Transcription intermediary factor 1-alpha OS=Homo sapiens (Human) OX=9606 GN=TRIM24 PE=1 SV=3 source=Uniprot,https://www.uniprot.org/uniprot/O15164	116.8	137.321	97.5205	138.62	134.348	107.416	138.078	118.517	117.317	116.15	124.692	134.072	118.24	117.236	128.665	134.712	113.997	95.4251	104.764	109.401	91.3912	107.109	117.65	114.344	111.995
ENSG00000164040	O15173	10424	PGRMC2	Membrane-associated progesterone receptor component 2 OS=Homo sapiens (Human) OX=9606 GN=PGRMC2 PE=1 SV=1 source=Uniprot,https://www.uniprot.org/uniprot/O15173	23.8	507.596	580.09	640.989	624.941	638.338	561.421	542.389	555.111	570.991	457.87	467.606	567.539	398.958	366.392	385.335	506.434	476.015	463.035	447.762	478.573	511.884	509.838	549.335	546.722
ENSG00000153140	O15182	1070	CETN3	Centrin-3 OS=Homo sapiens (Human) OX=9606 GN=CETN3 PE=1 SV=2 source=Uniprot,https://www.uniprot.org/uniprot/O15182	19.5	109.681	63.3592	66.6976	94.0689	52.3816	97.9363	99.7235	102.119	108.883	83.3908	105.902	105.562	74.0272	76.4265	72.2052	71.657	47.7224	65.906	63.5317	50.1246	59.9007	61.0187	76.653	76.8992
ENSG00000237441	O15211	5863	RGL2	Ral guanine nucleotide dissociation stimulator-like 2 OS=Homo sapiens (Human) OX=9606 GN=RGL2 PE=1 SV=1 source=Uniprot,https://www.uniprot.org/uniprot/O15211	83.5	11.7342	10.3525	11.1275	8.75663	10.8437	7.97617	11.8563	9.96036	8.83812	12.6659	9.14515	8.86198	8.46729	8.43839	6.40024	6.66332	9.20699	6.55601	8.50335	9.50562	8.77217	11.6429	8.7229	6.27522
ENSG00000204220	O15212	10471	PFDN6	Prefoldin subunit 6 OS=Homo sapiens (Human) OX=9606 GN=PFDN6 PE=1 SV=1 source=Uniprot,https://www.uniprot.org/uniprot/O15212	14.6	523.432	577.197	504.514	595.639	589.148	483.128	507.994	516.871	516.968	515.749	499.437	472.787	553.783	580.193	568.718	714.139	662.747	637.781	775.27	714.919	657.349	691.814	596.833	628.637
ENSG00000227057	O15213	9277	WDR46	WD repeat-containing protein 46 OS=Homo sapiens (Human) OX=9606 GN=WDR46 PE=1 SV=3 source=Uniprot,https://www.uniprot.org/uniprot/O15213	68	38.1839	28.9674	39.1185	33.2707	29.3109	44.5505	31.8554	36.6949	34.9505	30.5299	37.3693	37.6516	32.6847	35.1164	38.0283	31.4176	28.483	36.0394	36.9219	32.1024	33.5615	29.4843	35.1831	33.3946
ENSG00000170899	O15217	2941	GSTA4	Glutathione S-transferase A4 OS=Homo sapiens (Human) OX=9606 GN=GSTA4 PE=1 SV=1 source=Uniprot,https://www.uniprot.org/uniprot/O15217	25.7	179.021	201.534	186.546	172.819	206.974	155.746	196.715	187.127	176.01	202.225	190.303	168.978	211.574	205.935	208.466	225.082	251.259	194.423	205.706	205.401	190.781	158.767	143.254	147.416
ENSG00000186416	O15226	55922	NKRF	NF-kappa-B-repressing factor OS=Homo sapiens (Human) OX=9606 GN=NKRF PE=1 SV=2 source=Uniprot,https://www.uniprot.org/uniprot/O15226	77.6	86.1953	85.1468	82.7732	81.1608	85.419	72.7198	74.5415	80.3765	79.652	75.5113	75.1389	71.9744	102.356	100.603	88.3864	99.9689	105.068	95.8156	98.4262	120.92	112.27	110.276	94.1137	98.9709
ENSG00000116906	O15228	8443	GNPAT	Dihydroxyacetone phosphate acyltransferase OS=Homo sapiens (Human) OX=9606 GN=GNPAT PE=1 SV=1 source=Uniprot,https://www.uniprot.org/uniprot/O15228	77.1	39.8244	50.1946	52.6399	44.6125	42.7012	32.3004	41.0461	43.3705	38.8664	47.916	45.5978	35.4436	36.953	30.0298	31.1059	44.805	41.8778	30.3025	44.6057	41.6305	37.9008	43.1539	35.5012	31.409
ENSG00000147394	O15231	7739	ZNF185	Zinc finger protein 185 OS=Homo sapiens (Human) OX=9606 GN=ZNF185 PE=1 SV=3 source=Uniprot,https://www.uniprot.org/uniprot/O15231	73.5	3.20484	19.54	13.884	1.50874	4.0619	3.1243	2.10104	2.38168	1.77317	2.9466	1.95591	1.28875	1.95199	2.00255	1.39004	1.75578	2.3298	1.60837	1.79609	2.96283	2.31043	1.69503	3.13337	2.09403
ENSG00000108349	O15234	22794	CASC3	Protein CASC3 OS=Homo sapiens (Human) OX=9606 GN=CASC3 PE=1 SV=2 source=Uniprot,https://www.uniprot.org/uniprot/O15234	76.2	109.709	124.606	104.929	85.1492	115.756	96.429	102.711	85.7553	90.916	93.7826	89.9144	96.7607	82.2439	79.5085	88.415	81.0296	82.8804	80.9629	83.3855	96.7609	91.0556	110.085	86.1323	93.2024
ENSG00000128626	O15235	6183	MRPS12	28S ribosomal protein S12, mitochondrial OS=Homo sapiens (Human) OX=9606 GN=MRPS12 PE=1 SV=1 source=Uniprot,https://www.uniprot.org/uniprot/O15235	15.2	49.1823	50.7174	45.9141	47.0765	54.9234	46.326	47.6809	43.9825	47.194	46.4842	48.965	47.486	43.2386	54.5341	49.3373	47.8256	67.3257	59.2772	69.2922	55.1984	57.1245	49.8719	50.6012	46.1265
ENSG00000128564	O15240	7425	VGF	Neurosecretory protein VGF OS=Homo sapiens (Human) OX=9606 GN=VGF PE=1 SV=2 source=Uniprot,https://www.uniprot.org/uniprot/O15240	67.2	13.3838	13.7822	10.4939	14.9411	14.647	9.36629	14.8299	16.6029	7.83359	15.3628	15.8418	9.75135	29.3529	37.2257	15.535	37.8204	27.6527	18.2301	30.9166	22.3698	23.4833	21.5575	18.3113	10.8482
ENSG00000087008	O15254	8310	ACOX3	Peroxisomal acyl-coenzyme A oxidase 3 OS=Homo sapiens (Human) OX=9606 GN=ACOX3 PE=1 SV=2 source=Uniprot,https://www.uniprot.org/uniprot/O15254	77.6	17.2285	19.0396	21.41	20.8046	16.9485	22.388	17.4075	22.6211	21.9457	21.69	22.2935	22.4164	24.6517	27.3305	24.6236	24.4779	20.8251	19.6203	20.6303	20.0182	19.795	16.3085	20.0304	21.0352
ENSG00000157916	O15258	11079	RER1	Protein RER1 OS=Homo sapiens (Human) OX=9606 GN=RER1 PE=1 SV=1 source=Uniprot,https://www.uniprot.org/uniprot/O15258	22.9	71.329	165.577	141.239	185.621	163.336	168.633	97.4876	129.792	153.177	105.212	135.283	178.3	138.207	141.93	192.28	358.666	188.506	202.27	148.85	180.11	149.427	74.6567	136.353	179.106
ENSG00000148248	O15260	6836	SURF4	Surfeit locus protein 4 OS=Homo sapiens (Human) OX=9606 GN=SURF4 PE=1 SV=3 source=Uniprot,https://www.uniprot.org/uniprot/O15260	30.4	189.202	160.408	189.396	87.8126	129.058	88.9358	174.015	130.297	111.808	110.453	111.514	105.955	115.896	114.859	102.594	92.8672	146.732	114.027	104.434	140.863	151.096	251.479	127.254	119.555
ENSG00000090054	O15269	10558	SPTLC1	Serine palmitoyltransferase 1 OS=Homo sapiens (Human) OX=9606 GN=SPTLC1 PE=1 SV=1 source=Uniprot,https://www.uniprot.org/uniprot/O15269	52.7	134.115	128.403	137.055	129.683	122.255	124.128	115.602	110.82	105.369	110.225	113.461	100.161	91.6333	76.5604	74.0252	82.8855	71.9073	69.6813	77.2185	72.5841	85.309	83.4027	80.0649	66.0626
ENSG00000100596	O15270	9517	SPTLC2	Serine palmitoyltransferase 2 OS=Homo sapiens (Human) OX=9606 GN=SPTLC2 PE=1 SV=1 source=Uniprot,https://www.uniprot.org/uniprot/O15270	62.9	43.119	38.0294	37.1373	35.7223	33.2016	30.9521	32.642	27.7381	28.7195	29.2341	32.6043	25.5609	34.5413	32.9563	31.2234	30.2862	28.6283	25.6069	30.6064	32.2749	28.9813	34.2243	36.0162	29.4516
ENSG00000147162	O15294	8473	OGT	UDP-N-acetylglucosamine--peptide N-acetylglucosaminyltransferase 110 kDa subunit OS=Homo sapiens (Human) OX=9606 GN=OGT PE=1 SV=3 source=Uniprot,https://www.uniprot.org/uniprot/O15294	116.9	189.762	194.32	197.412	191.095	185.144	183.089	188.125	196.427	192.205	202.878	194.881	190.305	203.456	206.832	200.073	210.33	235.915	190.397	276.352	247.387	235.537	225.432	213.818	217.707
ENSG00000170836	O15297	8493	PPM1D	Protein phosphatase 1D OS=Homo sapiens (Human) OX=9606 GN=PPM1D PE=1 SV=1 source=Uniprot,https://www.uniprot.org/uniprot/O15297	66.6	12.64	12.4655	13.9641	12.0807	17.8617	11.9683	12.0523	11.5321	10.8924	15.029	10.828	11.7345	10.7812	9.25398	8.24913	10.3165	12.0465	9.19572	9.18256	14.9575	11.7041	8.38145	9.32512	9.83496
ENSG00000140650	O15305	5373	PMM2	Phosphomannomutase 2 OS=Homo sapiens (Human) OX=9606 GN=PMM2 PE=1 SV=1 source=Uniprot,https://www.uniprot.org/uniprot/O15305	28.1	137.455	69.0989	106.404	104.799	77.3295	107.137	127.871	129.04	105.985	110	118.618	120.897	78.4931	91.144	82.3767	92.7027	88.5251	100.667	104.552	92.1055	106.723	183.331	130.624	120.654
ENSG00000101871	O15344	4281	MID1	E3 ubiquitin-protein ligase Midline-1 OS=Homo sapiens (Human) OX=9606 GN=MID1 PE=1 SV=1 source=Uniprot,https://www.uniprot.org/uniprot/O15344	75.2	170.72	208.381	242.586	261.451	232.419	212.024	166.346	252.099	192.143	150.413	154.121	157.382	222.819	167.926	177.077	200.963	166.557	172.964	163.255	150.456	167.137	106.909	138.195	139.51
ENSG00000029993	O15347	3149	HMGB3	High mobility group protein B3 OS=Homo sapiens (Human) OX=9606 GN=HMGB3 PE=1 SV=4 source=Uniprot,https://www.uniprot.org/uniprot/O15347	23	2642.07	1804.42	2061.49	2936.99	2280.59	3824.71	2556.7	2443.63	3151.22	2806.57	3342.67	3358.25	2628.59	3851.97	4326.03	2666.18	2429.05	3320.76	2421.35	2323.1	2769.81	2399.57	2746.55	3174.87
ENSG00000115241	O15355	5496	PPM1G	Protein phosphatase 1G OS=Homo sapiens (Human) OX=9606 GN=PPM1G PE=1 SV=1 source=Uniprot,https://www.uniprot.org/uniprot/O15355	59.2	444.19	439.291	417.411	376.945	460.468	364.5	415.84	345.015	385.609	417.998	348.524	362.165	410.124	397.662	362.236	386.853	437.516	384.657	466.867	526.895	458.693	515.861	373.971	385.202
ENSG00000165458	O15357	3636	INPPL1	Phosphatidylinositol 3,4,5-trisphosphate 5-phosphatase 2 OS=Homo sapiens (Human) OX=9606 GN=INPPL1 PE=1 SV=2 source=Uniprot,https://www.uniprot.org/uniprot/O15357	138.5	71.3617	64.2044	65.8528	58.0463	73.5235	52.7144	67.3288	56.7558	56.4363	71.5145	62.6573	61.5725	34.6831	24.2697	32.3703	32.3651	33.087	32.2682	30.3724	34.3302	35.5087	39.4835	34.6697	32.0535
ENSG00000177732	O15370	6666	SOX12	Transcription factor SOX-12 OS=Homo sapiens (Human) OX=9606 GN=SOX12 PE=2 SV=2 source=Uniprot,https://www.uniprot.org/uniprot/O15370	34.1	63.2679	44.2379	45.2486	36.6358	43.322	42.2894	42.979	48.4983	40.6817	39.594	44.4968	39.0334	42.4792	38.8718	36.4972	35.661	35.7552	37.9982	44.3197	48.8237	46.0698	62.2836	43.0629	40.3259
ENSG00000100353	O15371	8664	EIF3D	Eukaryotic translation initiation factor 3 subunit D OS=Homo sapiens (Human) OX=9606 GN=EIF3D PE=1 SV=1 source=Uniprot,https://www.uniprot.org/uniprot/O15371	63.9	241.779	286.4	264.161	280.622	271.575	249.906	241.123	246.541	285.107	236.572	238.901	265.02	269.836	246.472	249.239	280.045	260.886	274.648	250.213	258.917	266.103	204.699	227.589	227.967
ENSG00000147677	O15372	8667	EIF3H	Eukaryotic translation initiation factor 3 subunit H OS=Homo sapiens (Human) OX=9606 GN=EIF3H PE=1 SV=1 source=Uniprot,https://www.uniprot.org/uniprot/O15372	39.9	264.602	262.535	292.47	282.118	249.823	227.109	255.541	240.826	239.283	253.126	225.127	218.999	274.603	237.842	234.851	256.062	247.29	221.611	274.902	244.813	234.619	223.316	216.692	197.785
ENSG00000171720	O15379	8841	HDAC3	Histone deacetylase 3 OS=Homo sapiens (Human) OX=9606 GN=HDAC3 PE=1 SV=2 source=Uniprot,https://www.uniprot.org/uniprot/O15379	48.8	68.1495	71.0629	78.5331	51.0327	76.4886	65.818	62.8722	66.3844	76.3761	73.7832	65.9446	78.732	59.8442	54.302	61.3137	42.1285	54.1865	57.4207	47.6972	57.8816	57.7384	47.6388	61.2321	64.3827
ENSG00000143748	O15381	4931	NVL	Nuclear valosin-containing protein-like OS=Homo sapiens (Human) OX=9606 GN=NVL PE=1 SV=1 source=Uniprot,https://www.uniprot.org/uniprot/O15381	95	24.2829	20.1948	24.8709	23.3458	22.0384	24.9595	23.413	24.7581	24.9203	23.1817	24.5565	25.4898	19.8304	17.7918	21.5842	18.9165	17.5896	17.4206	18.1701	16.652	21.0548	17.3407	17.922	20.0884
ENSG00000154654	O15394	4685	NCAM2	Neural cell adhesion molecule 2 OS=Homo sapiens (Human) OX=9606 GN=NCAM2 PE=1 SV=2 source=Uniprot,https://www.uniprot.org/uniprot/O15394	93	12.5143	13.7938	6.78164	12.233	14.4435	11.0101	13.3762	15.0284	11.1211	13.9205	12.8168	12.5715	14.3857	12.2697	11.5146	9.46508	11.6288	8.78473	7.82643	14.5132	8.43458	8.1242	11.6409	6.89673
ENSG00000133704	O15397	10526	IPO8	Importin-8 OS=Homo sapiens (Human) OX=9606 GN=IPO8 PE=1 SV=2 source=Uniprot,https://www.uniprot.org/uniprot/O15397	119.9	75.5384	88.1252	85.0822	67.4511	78.0776	58.9988	67.0012	54.5708	60.1481	67.6219	57.3353	57.8525	34.7609	39.2637	37.6386	43.3346	51.2963	42.6741	40.3968	46.5703	43.4427	36.7283	38.1039	33.1924
ENSG00000079950	O15400	8417	STX7	Syntaxin-7 OS=Homo sapiens (Human) OX=9606 GN=STX7 PE=1 SV=4 source=Uniprot,https://www.uniprot.org/uniprot/O15400	29.8	180.928	191.826	171.874	194.557	216.041	165.466	202.044	210.817	208.033	203.087	222.421	184.581	413.176	392.412	370.635	428.606	460.046	371.62	501.51	457.842	485.617	468.443	432.551	446.568
ENSG00000182095	O15417	84629	TNRC18	Trinucleotide repeat-containing gene 18 protein OS=Homo sapiens (Human) OX=9606 GN=TNRC18 PE=1 SV=3 source=Uniprot,https://www.uniprot.org/uniprot/O15417	314.3	4.49121	5.58251	3.78432	4.24132	5.38315	5.79779	4.52288	5.67101	5.11621	4.04591	4.88678	5.25195	4.18567	3.61931	4.06402	4.92596	4.85761	4.44795	3.50889	4.87261	4.11899	3.84463	4.81907	4.96313
ENSG00000125257	O15439	10257	ABCC4	Multidrug resistance-associated protein 4 OS=Homo sapiens (Human) OX=9606 GN=ABCC4 PE=1 SV=3 source=Uniprot,https://www.uniprot.org/uniprot/O15439	149.4	6.54505	2.77498	2.74009	2.14047	2.75415	3.21921	2.52526	2.32036	2.26784	1.70077	2.2271	2.52538	1.53403	1.92762	2.28689	1.49638	1.70036	1.8872	1.84137	1.55727	1.75771	1.87635	2.00892	1.82802
ENSG00000117877	O15446	10849	CD3EAP	DNA-directed RNA polymerase I subunit RPA34 OS=Homo sapiens (Human) OX=9606 GN=CD3EAP PE=1 SV=1 source=Uniprot,https://www.uniprot.org/uniprot/O15446	55	38.5432	37.39	19.6207	26.3917	31.883	45.2807	29.5521	28.272	29.8225	30.8022	27.0194	34.3594	27.0781	20.1268	30.1322	22.336	27.2094	30.2804	28.9315	33.5535	23.7927	32.7953	25.6971	29.028
ENSG00000072682	O15460	8974	P4HA2	Prolyl 4-hydroxylase subunit alpha-2 OS=Homo sapiens (Human) OX=9606 GN=P4HA2 PE=1 SV=1 source=Uniprot,https://www.uniprot.org/uniprot/O15460	60.9	27.1371	20.7392	18.046	8.88558	10.6069	7.78079	20.9543	22.1014	16.6675	9.18087	13.9508	14.8282	10.5606	7.24974	7.24703	4.06959	4.28635	5.80932	6.12827	8.18151	14.1575	15.2651	21.6254	18.3522
ENSG00000149260	O15484	726	CAPN5	Calpain-5 OS=Homo sapiens (Human) OX=9606 GN=CAPN5 PE=1 SV=2 source=Uniprot,https://www.uniprot.org/uniprot/O15484	73.1	40.4716	32.6535	29.1039	32.3922	31.9145	38.8989	39.9445	34.7933	38.1052	42.3913	47.7052	47.1793	37.4886	42.7574	46.8924	33.5577	38.0345	40.2755	38.183	37.4741	40.4671	42.3893	41.7537	42.8751
ENSG00000106636	O15498	10652	YKT6	Synaptobrevin homolog YKT6 OS=Homo sapiens (Human) OX=9606 GN=YKT6 PE=1 SV=1 source=Uniprot,https://www.uniprot.org/uniprot/O15498	22.4	220.895	225.691	203.74	208.658	221.406	173.217	233.136	219.665	214.458	222.889	216.788	212.455	235.414	237.286	218.156	233.034	253.836	212.238	284.829	299.019	273.068	288.647	258.497	271.449
ENSG00000162704	O15511	10092	ARPC5	Actin-related protein 2/3 complex subunit 5 OS=Homo sapiens (Human) OX=9606 GN=ARPC5 PE=1 SV=3 source=Uniprot,https://www.uniprot.org/uniprot/O15511	16.3	359.844	391.621	388.092	325.455	363.142	248.381	388.981	299.991	332.477	367.592	343.314	318.519	354.906	370.102	328.067	423.319	488.959	358.693	564.007	618.142	525.008	714.013	494.322	449.675
ENSG00000144231	O15514	5433	POLR2D	DNA-directed RNA polymerase II subunit RPB4 OS=Homo sapiens (Human) OX=9606 GN=POLR2D PE=1 SV=1 source=Uniprot,https://www.uniprot.org/uniprot/O15514	16.3	98.5229	105.317	125.773	131.653	117.913	121.551	115.448	127.443	118.608	118.044	131.833	117.108	128.578	126.038	115.77	125.482	102.926	107.742	116.915	119.77	126.661	89.4372	119.746	119.173
ENSG00000140992	O15530	5170	PDPK1	3-phosphoinositide-dependent protein kinase 1 OS=Homo sapiens (Human) OX=9606 GN=PDPK1 PE=1 SV=1 source=Uniprot,https://www.uniprot.org/uniprot/O15530	63.1	79.2097	108.406	90.3433	96.7792	90.977	84.6875	95.2079	111.637	97.5535	104.641	99.491	99.2556	116.377	126.698	113.167	126.007	124.696	111.382	118.381	127.372	112.503	115.453	126.339	118.643
ENSG00000231925	O15533	6892	TAPBP	Tapasin OS=Homo sapiens (Human) OX=9606 GN=TAPBP PE=1 SV=1 source=Uniprot,https://www.uniprot.org/uniprot/O15533	47.6	32.0938	26.7498	39.4544	50.3615	43.4259	50.1889	69.6735	45.2295	53.8354	76.3045	65.8934	77.7543	20.7926	11.9961	18.7792	30.6746	15.386	21.2356	24.2746	20.2474	28.8724	36.3647	23.6035	29.993
ENSG00000164434	O15540	2173	FABP7	Fatty acid-binding protein, brain OS=Homo sapiens (Human) OX=9606 GN=FABP7 PE=1 SV=3 source=Uniprot,https://www.uniprot.org/uniprot/O15540	14.9	2155.12	1886.34	1638.75	4467.99	4767.98	4790.02	4704.75	7054.49	5093.22	5640.79	3955.6	5420.03	1617.12	1423.66	1591.67	2093.33	2145.99	2184.92	5032.89	5811.83	5169.09	5380.12	4991.21	5718.53
ENSG00000125352	O15541	7737	RNF113A	E3 ubiquitin-protein ligase RNF113A OS=Homo sapiens (Human) OX=9606 GN=RNF113A PE=1 SV=1 source=Uniprot,https://www.uniprot.org/uniprot/O15541	38.8	85.2914	82.1435	78.9252	90.5427	90.3377	103.917	88.9373	101.588	94.8341	86.6073	95.0683	97.9513	117.194	134.921	130.338	115.212	108.828	130.153	124.476	118.777	107.489	112.634	103.213	121.753
ENSG00000147050	O15550	7403	KDM6A	Lysine-specific demethylase 6A OS=Homo sapiens (Human) OX=9606 GN=KDM6A PE=1 SV=2 source=Uniprot,https://www.uniprot.org/uniprot/O15550	154.1	19.0455	17.0362	18.1736	18.0832	18.1234	18.7889	17.7961	16.3026	17.457	17.8963	15.1168	18.1852	16.9118	13.7221	14.2904	18.1879	16.8873	13.907	14.2208	13.7756	14.4753	15.1249	12.6893	14.7702
ENSG00000215021	Q99623	11331	PHB2	Prohibitin-2 OS=Mus musculus (Mouse) OX=10090 GN=Phb2 PE=1 SV=1	33.3	627.649	710.613	670.609	726.552	714.638	671.41	632.039	569.031	616.715	654.177	668.993	642.097	703.071	632.286	681.018	929.772	856.004	792.504	877.246	847.166	747.975	741.945	805.374	733.267
ENSG00000115233	O00487	10213	PSMD14	26S proteasome non-ATPase regulatory subunit 14 OS=Mus musculus (Mouse) OX=10090 GN=Psmd14 PE=1 SV=2	34.6	358.758	392.263	375.839	354.923	366.65	358.127	372.708	363.405	367.937	376.303	342.03	356.025	366.313	416.747	401.202	378.929	417.243	380.799	416.515	406.498	401.727	406.732	368.703	359.913
ENSG00000204392	Q9Y333	57819	LSM2	U6 snRNA-associated Sm-like protein LSm2 OS=Mus musculus (Mouse) OX=10090 GN=Lsm2 PE=1 SV=1	10.8	863.114	725.412	769.616	690.462	883.048	1070.04	765.877	705.937	885.128	694.306	857.002	919.423	765.75	938.397	1016.3	709.478	826.13	954.013	675.7	779.533	830.494	831.726	820.716	901.657
ENSG00000109606	O43143	1665	DHX15	Pre-mRNA-splicing factor ATP-dependent RNA helicase DHX15 OS=Homo sapiens (Human) OX=9606 GN=DHX15 PE=1 SV=2 source=Uniprot,https://www.uniprot.org/uniprot/O43143	90.9	729.272	680.689	731.058	668.16	670.116	656.485	660.21	682.338	692.561	683.471	726.087	681.611	635.875	717.566	673.554	633.837	636.871	623.001	642.617	679.738	684.924	709.333	677.623	674.137
ENSG00000101654	O43148	8731	RNMT	mRNA cap guanine-N7 methyltransferase OS=Homo sapiens (Human) OX=9606 GN=RNMT PE=1 SV=1 source=Uniprot,https://www.uniprot.org/uniprot/O43148	54.8	342.254	308.67	342.644	386.722	324.977	302.142	320.271	382.64	338.021	313.974	294.35	291.891	502.345	544.341	466.001	506.633	444.829	411.235	555.358	487.945	481.179	426.68	419.44	427.25
ENSG00000074755	O43149	23140	ZZEF1	Zinc finger ZZ-type and EF-hand domain-containing protein 1 OS=Homo sapiens (Human) OX=9606 GN=ZZEF1 PE=1 SV=6 source=Uniprot,https://www.uniprot.org/uniprot/O43149	330.9	19.5116	22.2768	20.5161	19.1272	20.5767	17.2981	20.5503	18.6649	19.7131	22.0908	20.3627	20.8881	23.0916	22.1079	21.98	23.8897	26.7456	21.032	24.3926	23.8943	22.7957	22.4678	20.0915	20.5621
ENSG00000151693	O43150	8853	ASAP2	Arf-GAP with SH3 domain, ANK repeat and PH domain-containing protein 2 OS=Homo sapiens (Human) OX=9606 GN=ASAP2 PE=1 SV=3 source=Uniprot,https://www.uniprot.org/uniprot/O43150	111.6	30.1625	31.388	29.0159	24.6693	28.6665	23.1882	26.891	27.3624	23.0448	24.8061	26.9858	23.0467	25.062	22.4937	22.4093	24.23	27.0127	22.6996	20.1702	21.7134	20.8231	24.9088	21.7198	20.6764
ENSG00000164050	O43157	5364	PLXNB1	Plexin-B1 OS=Homo sapiens (Human) OX=9606 GN=PLXNB1 PE=1 SV=3 source=Uniprot,https://www.uniprot.org/uniprot/O43157	232.2	9.13345	15.2471	15.3933	8.96569	9.73992	6.00014	8.92016	8.9551	8.49429	8.63213	9.59928	8.99645	7.76199	6.8902	6.26284	6.96692	6.34913	5.21926	8.30935	7.15149	7.11727	7.60925	6.26911	6.30912
ENSG00000132275	O43159	23378	RRP8	Ribosomal RNA-processing protein 8 OS=Homo sapiens (Human) OX=9606 GN=RRP8 PE=1 SV=2 source=Uniprot,https://www.uniprot.org/uniprot/O43159	50.7	134.326	138.128	122.316	161.663	167.607	129.167	130.484	141.667	121.154	110.125	106.867	106.374	106.732	85.4551	90.1885	96.097	91.3852	95.4733	109.44	122.671	104.28	96.6549	99.4474	100.84
ENSG00000198961	O43164	9867	PJA2	E3 ubiquitin-protein ligase Praja-2 OS=Homo sapiens (Human) OX=9606 GN=PJA2 PE=1 SV=4 source=Uniprot,https://www.uniprot.org/uniprot/O43164	78.2	10.8839	20.2602	16.0386	21.9039	14.1527	19.9182	18.5909	9.84405	21.1489	16.4379	11.7115	22.7289	23.1202	27.2694	27.4467	27.222	31.6532	27.8484	19.6758	20.3188	20.5951	12.0953	14.6722	20.2366
ENSG00000197555	O43166	26037	SIPA1L1	Signal-induced proliferation-associated 1-like protein 1 OS=Homo sapiens (Human) OX=9606 GN=SIPA1L1 PE=1 SV=4 source=Uniprot,https://www.uniprot.org/uniprot/O43166	199.9	3.74494	2.54544	3.49605	3.5761	2.17881	2.48251	3.77565	3.53084	3.68854	4.41465	4.61982	4.03355	3.55	3.65741	2.85539	4.79053	4.5452	3.93844	5.23717	3.09623	4.17555	4.80428	4.3533	4.40947
ENSG00000112365	O43167	9841	ZBTB24	Zinc finger and BTB domain-containing protein 24 OS=Homo sapiens (Human) OX=9606 GN=ZBTB24 PE=1 SV=2 source=Uniprot,https://www.uniprot.org/uniprot/O43167	78.2	8.10636	6.42111	10.2323	6.1141	6.65299	3.2791	6.99813	6.29603	7.5083	7.23661	6.7832	5.396	4.70669	5.89255	2.04832	6.02242	6.8164	7.25614	7.5821	8.20286	9.80326	6.9842	6.77694	6.47267
ENSG00000103018	O43169	80777	CYB5B	Cytochrome b5 type B OS=Homo sapiens (Human) OX=9606 GN=CYB5B PE=1 SV=3 source=Uniprot,https://www.uniprot.org/uniprot/O43169	16.7	744.448	729.411	705.214	782.791	732.343	603.914	521.244	539.065	571.832	457.105	507.686	478.847	800.118	631.555	652.234	1044.86	957.714	754.532	771.053	576.457	564.951	478.025	490.59	472.219
ENSG00000136875	O43172	9128	PRPF4	U4/U6 small nuclear ribonucleoprotein Prp4 OS=Homo sapiens (Human) OX=9606 GN=PRPF4 PE=1 SV=2 source=Uniprot,https://www.uniprot.org/uniprot/O43172	58.4	240.958	244.195	246.381	268.552	254.239	292.191	253.707	233.238	248.626	230.797	247.537	256.493	254.023	245.03	263.166	258.437	235.033	256.408	260.401	261.005	263.978	240.297	247.318	268.601
ENSG00000092621	O43175	26227	PHGDH	D-3-phosphoglycerate dehydrogenase OS=Homo sapiens (Human) OX=9606 GN=PHGDH PE=1 SV=4 source=Uniprot,https://www.uniprot.org/uniprot/O43175	56.6	1033.55	1177.57	1276.91	1228.86	1136.19	1110.7	959.088	1211.14	977.318	979.503	990.07	955.161	458.262	431.35	522.011	498.913	590.64	490.67	476.441	473.952	445.901	443.884	491.825	425.819
ENSG00000164258	O43181	4724	NDUFS4	NADH dehydrogenase [ubiquinone] iron-sulfur protein 4, mitochondrial OS=Homo sapiens (Human) OX=9606 GN=NDUFS4 PE=1 SV=1 source=Uniprot,https://www.uniprot.org/uniprot/O43181	20.1	296.454	247.137	282.861	367.695	324.411	334.897	302.337	235.634	282.089	263.075	270.913	282.788	389.102	377.229	370.832	540.873	485.558	510.325	490.469	321.073	384.021	343.639	316.086	291.854
ENSG00000112511	O43189	5252	PHF1	PHD finger protein 1 OS=Homo sapiens (Human) OX=9606 GN=PHF1 PE=1 SV=3 source=Uniprot,https://www.uniprot.org/uniprot/O43189	62.1	14.66	18.6505	14.442	18.1363	20.0558	21.5077	17.885	26.5043	20.0406	19.6894	21.0581	20.063	23.2551	22.6681	28.3962	23.9542	26.3966	27.8268	25.1091	31.3165	25.9416	22.8404	27.299	29.426
ENSG00000204410	O43196	4439	MSH5			24.2539	22.5975	24.7709	26.2849	22.9487	18.0479	24.4671	20.5339	22.0076	22.9429	21.3493	20.3448	23.5928	25.8334	22.6224	29.7009	28.7516	22.2303	31.2407	26.3941	26.7722	27.4681	24.0924	21.2951
ENSG00000108387	O43236	5414	SEPTIN4	Septin-4 OS=Homo sapiens (Human) OX=9606 GN=SEPTIN4 PE=1 SV=1 source=Uniprot,https://www.uniprot.org/uniprot/O43236	55.1	15.8171	17.5602	16.0104	18.583	19.7636	22.2148	22.8243	23.773	27.0287	26.1602	27.5097	30.5755	37.3115	33.6745	35.993	44.3733	42.9593	37.2735	43.0771	34.305	39.7197	48.0913	37.7404	49.9549
ENSG00000135720	O43237	1783	DYNC1LI2	Cytoplasmic dynein 1 light intermediate chain 2 OS=Homo sapiens (Human) OX=9606 GN=DYNC1LI2 PE=1 SV=1 source=Uniprot,https://www.uniprot.org/uniprot/O43237	54.1	289.051	284.688	283.316	398.833	335.498	413.983	378.69	408.404	411.229	389.783	436.47	428.583	536.276	601.439	590.847	496.003	436.359	424.975	440.702	406.884	437.82	460.493	532.489	522.565
ENSG00000108344	O43242	5709	PSMD3	26S proteasome non-ATPase regulatory subunit 3 OS=Homo sapiens (Human) OX=9606 GN=PSMD3 PE=1 SV=2 source=Uniprot,https://www.uniprot.org/uniprot/O43242	60.9	567.085	655.114	582.179	561.662	625.316	551.219	591.211	558.181	564.499	569.196	564.613	569.47	622.453	646.159	632.622	642.732	712.666	607.703	675.527	678.284	648.01	678.563	580.654	596.318
ENSG00000138801	O43252	9061	PAPSS1	Bifunctional 3'-phosphoadenosine 5'-phosphosulfate synthase 1 OS=Homo sapiens (Human) OX=9606 GN=PAPSS1 PE=1 SV=2 source=Uniprot,https://www.uniprot.org/uniprot/O43252	70.8	274.781	391.523	281.859	277.937	307.114	282.694	265.041	247.504	288.333	253.824	260.74	274.846	269.177	235.804	278.088	324.331	364.945	340.696	357.581	397.459	368.903	251.533	245.771	260.108
ENSG00000086827	O43264	9183	ZW10	Centromere/kinetochore protein zw10 homolog OS=Homo sapiens (Human) OX=9606 GN=ZW10 PE=1 SV=3 source=Uniprot,https://www.uniprot.org/uniprot/O43264	88.8	63.9411	81.1352	67.7844	66.599	80.6406	74.0458	57.2664	55.744	61.9653	56.9016	62.3733	66.5144	46.7641	38.9786	49.632	52.9337	54.0837	48.3388	41.4359	51.1997	44.141	37.0658	41.3563	44.4667
ENSG00000100842	O43281	10278	EFS	Embryonal Fyn-associated substrate OS=Homo sapiens (Human) OX=9606 GN=EFS PE=1 SV=1 source=Uniprot,https://www.uniprot.org/uniprot/O43281	58.8	58.7806	49.7042	51.9274	49.4887	60.3357	46.3693	56.1503	56.844	48.1271	58.1625	51.8054	47.4345	32.7582	16.5165	26.7296	28.455	32.5205	25.5591	32.7796	37.6384	32.2206	42.887	38.4539	32.2576
ENSG00000175467	O43290	9092	SART1	U4/U6.U5 tri-snRNP-associated protein 1 OS=Homo sapiens (Human) OX=9606 GN=SART1 PE=1 SV=1 source=Uniprot,https://www.uniprot.org/uniprot/O43290	90.2	293.182	276.982	285.273	253.989	287.594	266.722	263.537	242.977	268.501	259.548	252.911	259.273	246.539	246.131	245.385	231.521	259.024	230.681	252.716	276.686	277.861	274.192	240.454	253.119
ENSG00000197858	O43292	8733	GPAA1	Glycosylphosphatidylinositol anchor attachment 1 protein OS=Homo sapiens (Human) OX=9606 GN=GPAA1 PE=1 SV=3 source=Uniprot,https://www.uniprot.org/uniprot/O43292	67.6	80.4194	90.5449	93.5396	58.6494	80.8844	54.5942	76.9218	61.2172	65.6218	61.0943	59.6131	60.6212	73.5382	77.6745	52.2902	70.7425	84.8011	55.9429	74.7835	78.3973	75.9457	65.286	68.8768	55.5942
ENSG00000167657	O43293	1613	DAPK3	Death-associated protein kinase 3 OS=Homo sapiens (Human) OX=9606 GN=DAPK3 PE=1 SV=1 source=Uniprot,https://www.uniprot.org/uniprot/O43293	52.5	49.3267	62.0306	46.7909	47.3249	41.1919	38.7571	40.1911	35.1448	39.4339	32.1255	35.9467	35.8725	37.849	40.2264	40.8582	40.2862	34.736	36.1454	32.0359	32.5559	37.07	27.211	27.7099	33.0297
ENSG00000140682	O43294	7041	TGFB1I1	Transforming growth factor beta-1-induced transcript 1 protein OS=Homo sapiens (Human) OX=9606 GN=TGFB1I1 PE=1 SV=2 source=Uniprot,https://www.uniprot.org/uniprot/O43294	49.8	2.78633	3.71063	4.69131	4.61086	6.40918	7.35926	4.3397	7.44378	7.51481	7.31037	11.5843	11.8701	6.90034	4.86044	5.5128	5.33123	3.59698	4.33353	4.32981	3.766	4.94814	4.07331	7.98888	6.74337
ENSG00000196220	O43295	9901	SRGAP3	SLIT-ROBO Rho GTPase-activating protein 3 OS=Homo sapiens (Human) OX=9606 GN=SRGAP3 PE=1 SV=3 source=Uniprot,https://www.uniprot.org/uniprot/O43295	124.4	109.288	107.966	96.4576	105.127	107.578	92.6413	92.9471	94.4945	93.957	87.1538	72.9614	88.3756	104.933	107.755	110.404	108.45	108.651	95.2363	105.151	91.6297	99.3173	119.844	95.3358	101.802
ENSG00000242802	O43299	9907	AP5Z1	AP-5 complex subunit zeta-1 OS=Homo sapiens (Human) OX=9606 GN=AP5Z1 PE=1 SV=2 source=Uniprot,https://www.uniprot.org/uniprot/O43299	88.5	5.17917	9.74378	12.6497	6.28639	8.62582	8.27234	7.38936	7.48124	7.48589	9.1082	8.69429	8.03629	8.89154	8.25241	7.39912	6.49831	7.15523	6.51107	6.47382	7.22653	8.37452	5.93	7.57244	6.86791
ENSG00000146006	O43300	26045	LRRTM2	Leucine-rich repeat transmembrane neuronal protein 2 OS=Homo sapiens (Human) OX=9606 GN=LRRTM2 PE=1 SV=3 source=Uniprot,https://www.uniprot.org/uniprot/O43300	59	2.19135	2.53478	3.22901	2.55999	3.33374	3.46438	4.10179	3.22544	5.13208	2.78121	3.89649	4.98951	1.14588	3.82987	4.17415	4.01809	7.81241	4.12534	2.19623	4.7486	4.9857	3.83636	4.59755	5.27164
ENSG00000165868	O43301	259217	HSPA12A	Heat shock 70 kDa protein 12A OS=Homo sapiens (Human) OX=9606 GN=HSPA12A PE=1 SV=2 source=Uniprot,https://www.uniprot.org/uniprot/O43301	74.9	13.7194	18.257	13.1173	16.0228	14.4057	15.8551	20.8404	15.5767	19.1229	27.961	19.303	18.7776	46.003	38.5399	44.8386	29.5678	19.6482	21.1094	24.3004	23.4003	24.6839	23.7151	29.4689	36.6887
ENSG00000103540	O43303	9738	CCP110	Centriolar coiled-coil protein of 110 kDa OS=Homo sapiens (Human) OX=9606 GN=CCP110 PE=1 SV=3 source=Uniprot,https://www.uniprot.org/uniprot/O43303	113.4	22.7315	18.3218	17.9779	23.8574	18.3012	17.865	27.7785	24.084	22.713	28.2562	26.4492	23.2311	25.7796	29.4724	23.173	30.9744	29.8338	26.9172	26.8764	26.2376	25.9889	24.4227	25.2843	22.7531
ENSG00000134030	O43310	9811	CTIF	CBP80/20-dependent translation initiation factor OS=Homo sapiens (Human) OX=9606 GN=CTIF PE=1 SV=1 source=Uniprot,https://www.uniprot.org/uniprot/O43310	67.5	78.4445	73.0699	53.788	63.4938	74.9916	64.3856	66.8369	66.2988	65.2182	71.517	61.8567	58.3035	107.517	119.938	136.677	75.354	92.6455	83.8615	83.6127	100.182	95.2579	120.632	73.267	82.9705
ENSG00000145725	O43314	23262	PPIP5K2	Inositol hexakisphosphate and diphosphoinositol-pentakisphosphate kinase 2 OS=Homo sapiens (Human) OX=9606 GN=PPIP5K2 PE=1 SV=3 source=Uniprot,https://www.uniprot.org/uniprot/O43314	140.3	56.9557	51.0134	45.8869	56.191	54.5327	49.5014	49.1869	48.9611	48.2677	46.3621	45.192	46.4905	52.8136	53.7471	57.0757	52.9255	59.8734	53.0297	47.4027	50.7775	46.0177	50.6987	50.679	50.7113
ENSG00000135341	O43318	6885	MAP3K7	Mitogen-activated protein kinase kinase kinase 7 OS=Homo sapiens (Human) OX=9606 GN=MAP3K7 PE=1 SV=1 source=Uniprot,https://www.uniprot.org/uniprot/O43318	67.2	38.335	46.6325	37.4098	36.8628	40.1253	45.4031	38.7538	40.3049	41.7073	43.1327	39.6908	41.176	40.2644	33.859	39.511	35.9422	36.1656	44.0503	37.3243	40.6155	36.8968	37.7902	38.6059	37.5134
ENSG00000124802	O43324	9521	EEF1E1	Eukaryotic translation elongation factor 1 epsilon-1 OS=Homo sapiens (Human) OX=9606 GN=EEF1E1 PE=1 SV=1 source=Uniprot,https://www.uniprot.org/uniprot/O43324	19.8	238.42	283.227	253.405	257.912	235.206	242.135	242.023	239.816	228.221	228.308	234.943	227.616	301.488	281.261	279.899	313.189	300.251	266.108	295.679	236.204	240.901	220.644	197.009	213.9
ENSG00000102897	O43325	57149	LYRM1			13.1849	19.5056	16.2185	11.814	16.2898	18.0405	13.374	12.248	17.7558	16.9364	18.8137	20.7018	13.764	17.2887	17.9534	20.5182	19.864	19.2349	23.1525	24.6948	26.5267	25.9299	21.3374	25.5753
ENSG00000135097	O43347	4440	MSI1	RNA-binding protein Musashi homolog 1 OS=Homo sapiens (Human) OX=9606 GN=MSI1 PE=1 SV=1 source=Uniprot,https://www.uniprot.org/uniprot/O43347	39.1	570.619	538.805	487.868	491.707	541.781	418.093	448.856	352.333	403.842	326.464	318.378	369.445	235.892	240.062	245.081	202.78	218.619	229.049	203.703	218.705	224.379	235.003	208.279	241.345
ENSG00000125944	O43390	10236	HNRNPR	Heterogeneous nuclear ribonucleoprotein R OS=Homo sapiens (Human) OX=9606 GN=HNRNPR PE=1 SV=1 source=Uniprot,https://www.uniprot.org/uniprot/O43390	70.9	823.579	839.447	915.98	859.306	880.109	913.388	852.79	904.865	890.439	873.588	927.67	885.351	947.162	1053.71	986.366	912.009	907.664	925.218	963.249	1008.64	1036.62	1014.07	1017.72	1056.35
ENSG00000117360	O43395	9129	PRPF3	U4/U6 small nuclear ribonucleoprotein Prp3 OS=Homo sapiens (Human) OX=9606 GN=PRPF3 PE=1 SV=2 source=Uniprot,https://www.uniprot.org/uniprot/O43395	77.5	282.55	228.14	266.234	306.174	258.168	285.298	278.431	286.582	274.486	278.877	296.598	271.285	296.602	290.352	282.285	281.409	257.944	276.175	283.774	289.915	295.262	267.756	291.668	297.279
ENSG00000091164	O43396	9352	TXNL1	Thioredoxin-like protein 1 OS=Homo sapiens (Human) OX=9606 GN=TXNL1 PE=1 SV=3 source=Uniprot,https://www.uniprot.org/uniprot/O43396	32.2	719.328	692.526	685.972	523.985	633.028	495.571	626.355	504.885	555.136	561.17	565.169	567.098	570.47	560	530.279	513.249	577.859	556.064	599.889	668.465	633.118	903.948	589.096	608.088
ENSG00000101150	O43399	7165	TPD52L2	Tumor protein D54 OS=Homo sapiens (Human) OX=9606 GN=TPD52L2 PE=1 SV=2 source=Uniprot,https://www.uniprot.org/uniprot/O43399	22.2	438.414	471.994	464.195	419.445	375.943	349.287	395.023	391.281	372.158	331.776	382.387	365.018	331.958	312.042	270.036	304.444	307.287	245.052	304.163	299.678	279.369	303.399	336.252	268.111
ENSG00000131148	O43402	10328	EMC8	ER membrane protein complex subunit 8 OS=Homo sapiens (Human) OX=9606 GN=EMC8 PE=1 SV=1 source=Uniprot,https://www.uniprot.org/uniprot/O43402	23.8	188.32	228.42	216.587	212.867	217.642	217.817	205.961	244.848	207.179	198.584	222.834	208.357	241.019	221.144	197.357	237.984	234.438	221.2	227.371	230.274	231.45	182.006	205.054	189.614
ENSG00000117419	O43414	79033	ERI3	ERI1 exoribonuclease 3 OS=Homo sapiens (Human) OX=9606 GN=ERI3 PE=1 SV=2 source=Uniprot,https://www.uniprot.org/uniprot/O43414	37.2	87.4066	108.001	95.9481	86.3741	97.2745	86.6854	85.5048	97.1246	95.0123	89.3207	87.7014	95.8655	100.998	115.804	104.715	109.284	108.353	103.466	122.196	107.433	98.4261	112.569	109.346	120.43
ENSG00000137492	O43422	5612	THAP12	52 kDa repressor of the inhibitor of the protein kinase OS=Homo sapiens (Human) OX=9606 GN=THAP12 PE=1 SV=2 source=Uniprot,https://www.uniprot.org/uniprot/O43422	87.6	31.0064	30.3783	30.3065	36.8127	38.8155	36.1388	37.196	36.2502	38.6529	39.3754	38.0605	40.2018	36.646	29.7369	36.6275	41.9025	38.5734	39.2477	41.7241	45.5402	40.0396	36.6806	34.5449	43.7482
ENSG00000159082	O43426	8867	SYNJ1	Synaptojanin-1 OS=Homo sapiens (Human) OX=9606 GN=SYNJ1 PE=1 SV=2 source=Uniprot,https://www.uniprot.org/uniprot/O43426	173	41.3192	43.8325	45.996	46.4952	48.705	39.6577	47.7377	46.3327	45.6578	47.8179	45.7699	44.8813	76.7308	79.2769	63.7018	70.6879	82.1557	59.4175	70.5944	78.2173	70.2246	71.5984	59.711	61.113
ENSG00000172500	O43427	9158	FIBP	Acidic fibroblast growth factor intracellular-binding protein OS=Homo sapiens (Human) OX=9606 GN=FIBP PE=1 SV=3 source=Uniprot,https://www.uniprot.org/uniprot/O43427	41.9	71.8622	77.3878	58.1901	55.258	57.8905	51.0192	67.5953	50.6237	60.6645	63.9919	58.9323	60.3339	53.2979	60.3166	54.3489	49.7306	46.9003	58.2847	52.3821	58.7664	53.1916	71.8495	65.14	63.203
ENSG00000075151	O43432	8672	EIF4G3	Eukaryotic translation initiation factor 4 gamma 3 OS=Homo sapiens (Human) OX=9606 GN=EIF4G3 PE=1 SV=2 source=Uniprot,https://www.uniprot.org/uniprot/O43432	176.5	50.9218	57.3956	55.1918	58.833	55.0121	55.6	56.1821	59.9326	60.6183	64.3488	60.5666	62.0183	70.8504	70.9815	67.0574	78.069	73.0683	61.6689	73.878	63.9895	68.2682	62.4751	63.2357	66.8094
ENSG00000078699	O43439	9139	CBFA2T2	Protein CBFA2T2 OS=Homo sapiens (Human) OX=9606 GN=CBFA2T2 PE=1 SV=1 source=Uniprot,https://www.uniprot.org/uniprot/O43439	67.1	21.4715	13.5176	20.3885	32.941	25.7828	26.1029	26.9163	28.7198	28.5458	29.3306	24.5069	28.0347	18.1081	15.8845	13.0453	20.8549	16.5872	12.5107	16.8294	22.7198	19.2612	22.3638	23.6753	29.4098
ENSG00000171960	O43447	10465	PPIH	Peptidyl-prolyl cis-trans isomerase H OS=Homo sapiens (Human) OX=9606 GN=PPIH PE=1 SV=1 source=Uniprot,https://www.uniprot.org/uniprot/O43447	19.2	399.186	436.13	404.569	475.948	465.165	501.711	374.323	398.286	389.214	337.509	452.609	448.186	358.043	377.968	461.056	408.875	345.582	354.628	343.091	403.714	317.089	374.1	390.871	408.901
ENSG00000115317	O43464	27429	HTRA2	Serine protease HTRA2, mitochondrial OS=Homo sapiens (Human) OX=9606 GN=HTRA2 PE=1 SV=2 source=Uniprot,https://www.uniprot.org/uniprot/O43464	48.8	45.2248	37.8865	37.378	36.8372	49.9114	41.3864	52.4952	46.5089	44.4966	48.701	45.8134	44.0913	53.8227	59.7947	52.1905	47.7216	60.4823	44.2455	71.5477	52.7854	54.0577	70.4243	54.9362	52.7561
ENSG00000053371	O43488	8574	AKR7A2	Aflatoxin B1 aldehyde reductase member 2 OS=Homo sapiens (Human) OX=9606 GN=AKR7A2 PE=1 SV=3 source=Uniprot,https://www.uniprot.org/uniprot/O43488	39.6	320.888	467.222	413.136	348.847	431.473	384.101	400.246	387.76	442.447	344.2	409.208	482.38	286.894	326.723	338.193	276.011	301.456	318.098	293.973	332.49	347.175	313.408	372.076	354.844
ENSG00000079819	O43491	2037	EPB41L2	Band 4.1-like protein 2 OS=Homo sapiens (Human) OX=9606 GN=EPB41L2 PE=1 SV=1 source=Uniprot,https://www.uniprot.org/uniprot/O43491	112.5	97.2601	95.1309	79.2384	95.7932	92.6914	78.0036	128.956	87.3363	109.207	83.261	97.2861	139.199	50.5937	37.4013	41.1548	43.903	38.9567	41.5061	44.0834	45.434	53.3519	70.4563	123.685	160.546
ENSG00000152291	O43493	10618	TGOLN2	Trans-Golgi network integral membrane protein 2 OS=Homo sapiens (Human) OX=9606 GN=TGOLN2 PE=1 SV=4 source=Uniprot,https://www.uniprot.org/uniprot/O43493	45.9	77.851	84.9794	79.1857	88.4176	64.1235	75.147	91.4877	77.8162	87.5368	95.5652	84.047	95.4444	113.468	99.5742	92.7399	117.608	121.125	79.7739	115.002	97.0607	94.7895	89.6238	83.1113	85.161
ENSG00000134248	O43504	10542	LAMTOR5	Ragulator complex protein LAMTOR5 OS=Homo sapiens (Human) OX=9606 GN=LAMTOR5 PE=1 SV=1 source=Uniprot,https://www.uniprot.org/uniprot/O43504	9.6	145.121	255.412	242.896	290.811	275.172	225.964	248.295	246.197	252.854	259.379	253.064	243.84	246.854	214.325	209.514	299.249	281.507	249.805	318.944	316.661	277.706	242.722	276.725	276.221
ENSG00000174684	O43505	11041	B4GAT1	Beta-1,4-glucuronyltransferase 1 OS=Homo sapiens (Human) OX=9606 GN=B4GAT1 PE=1 SV=1 source=Uniprot,https://www.uniprot.org/uniprot/O43505	47.1	46.3328	68.8195	54.0517	51.4197	55.6764	45.3781	44.0662	38.7516	44.6304	41.7095	34.9741	49.1543	75.3028	72.3184	65.4739	72.3594	83.7374	64.3164	69.3341	67.729	60.7715	48.8163	43.3894	45.4939
ENSG00000155868	O43513	9443	MED7	Mediator of RNA polymerase II transcription subunit 7 OS=Homo sapiens (Human) OX=9606 GN=MED7 PE=1 SV=1 source=Uniprot,https://www.uniprot.org/uniprot/O43513	27.2	14.2982	9.78433	9.52122	9.02062	9.11645	7.09482	10.4095	8.93199	7.48331	9.44303	8.37777	7.07659	7.17996	6.93156	5.91149	8.20033	9.10206	7.65594	9.9091	9.68426	10.3847	10.8878	6.76211	7.28945
ENSG00000118689	O43524	2309	FOXO3	Forkhead box protein O3 OS=Homo sapiens (Human) OX=9606 GN=FOXO3 PE=1 SV=1 source=Uniprot,https://www.uniprot.org/uniprot/O43524	71.2	22.4344	16.6401	16.838	15.039	15.9886	17.4344	19.5104	17.5782	19.3878	18.8579	21.3377	24.9609	11.9032	15.4968	17.2326	16.0103	15.9132	17.3279	14.6211	18.761	19.3845	23.3458	20.0754	22.7458
ENSG00000115526	O43529	9486	CHST10	Carbohydrate sulfotransferase 10 OS=Homo sapiens (Human) OX=9606 GN=CHST10 PE=1 SV=1 source=Uniprot,https://www.uniprot.org/uniprot/O43529	42.2	51.5716	56.5727	54.6405	70.7452	57.951	69.8171	48.344	59.3646	58.7835	52.8612	49.3465	63.543	42.495	46.9998	59.9294	51.4229	50.6966	71.2449	57.4435	58.3158	56.7251	46.0508	60.1275	58.4434
ENSG00000082996	O43567	11342	RNF13	E3 ubiquitin-protein ligase RNF13 OS=Homo sapiens (Human) OX=9606 GN=RNF13 PE=1 SV=1 source=Uniprot,https://www.uniprot.org/uniprot/O43567	42.8	42.7384	57.7437	59.0528	58.507	39.232	30.4914	64.1417	39.1939	50.1984	62.9482	60.6237	43.1091	41.6168	40.9341	34.265	51.605	48.3199	34.2048	54.7122	56.9883	53.2481	83.892	52.253	43.121
ENSG00000139726	O43583	8562	DENR	Density-regulated protein OS=Homo sapiens (Human) OX=9606 GN=DENR PE=1 SV=2 source=Uniprot,https://www.uniprot.org/uniprot/O43583	22.1	247.527	235.866	248.554	230.783	234.302	201.185	239.976	221.118	209.216	217.597	230.383	206.076	258.727	274.635	269.112	263.623	270.082	235.042	274.613	264.817	223.774	266.531	249.442	233.514
ENSG00000184575	O43592	11260	XPOT	Exportin-T OS=Homo sapiens (Human) OX=9606 GN=XPOT PE=1 SV=2 source=Uniprot,https://www.uniprot.org/uniprot/O43592	109.9	148.201	134.913	148.621	132.155	166.196	100.585	147.712	141.524	125.947	131.254	110.057	121.297	92.2023	90.2515	87.52	111.777	125.631	96.5984	120.563	128.842	120.046	129.061	103.099	102.835
ENSG00000112667	O43598	10591	DNPH1	2'-deoxynucleoside 5'-phosphate N-hydrolase 1 OS=Homo sapiens (Human) OX=9606 GN=DNPH1 PE=1 SV=1 source=Uniprot,https://www.uniprot.org/uniprot/O43598	19.1	275.28	285.266	263.878	148.059	265.637	228.168	207.8	157.644	221.292	200.716	206.183	236.723	130.999	175.613	232.975	139.775	179.09	197.323	145.042	162.684	184.448	162.321	189.632	182.202
ENSG00000077279	O43602	1641	DCX	Neuronal migration protein doublecortin OS=Homo sapiens (Human) OX=9606 GN=DCX PE=1 SV=4 source=Uniprot,https://www.uniprot.org/uniprot/O43602	40.5	597.538	586.494	567.023	842.954	599.341	1011.65	877.018	984.825	1020.23	1182.62	1487.06	1158.31	1981.53	1957.49	2280.39	1914.92	1357.39	1618.07	1780.28	1508.44	1610.59	1620.82	2051.8	2114.1
ENSG00000104980	O43615	10469	TIMM44	Mitochondrial import inner membrane translocase subunit TIM44 OS=Homo sapiens (Human) OX=9606 GN=TIMM44 PE=1 SV=2 source=Uniprot,https://www.uniprot.org/uniprot/O43615	51.3	196.667	225.272	218.546	213.697	233.469	195.775	193.692	174.097	192.319	199.197	168.64	183.763	230.713	173.524	197.229	271.224	284.954	252.598	260.982	249.716	233.678	221.279	214.743	206.403
ENSG00000054116	O43617	27095	TRAPPC3	Trafficking protein particle complex subunit 3 OS=Homo sapiens (Human) OX=9606 GN=TRAPPC3 PE=1 SV=1 source=Uniprot,https://www.uniprot.org/uniprot/O43617	20.3	373.279	308.715	500.699	340.037	313.362	269.719	327.324	324.636	270.931	284.87	328.299	254.148	347.819	332.403	292.756	366.387	360.773	290.056	365.81	339.738	342.026	380.712	329.86	281.04
ENSG00000130724	O43633	27243	CHMP2A	Charged multivesicular body protein 2a OS=Homo sapiens (Human) OX=9606 GN=CHMP2A PE=1 SV=1 source=Uniprot,https://www.uniprot.org/uniprot/O43633	25.1	203.887	258.316	204.942	236.281	260.408	219.227	245.917	229.013	233.52	262.637	230.877	239.867	215.932	193.501	211.685	204.754	251.908	223.607	230.793	265.815	233.828	226.824	205.062	235
ENSG00000071051	O43639	8440	NCK2	Cytoplasmic protein NCK2 OS=Homo sapiens (Human) OX=9606 GN=NCK2 PE=1 SV=2 source=Uniprot,https://www.uniprot.org/uniprot/O43639	42.9	135.708	143.432	148.725	129.641	124.924	145.572	145.786	135.514	165.071	131.797	148.82	161.09	160.253	159.835	177.973	171.584	213.201	196.729	225.291	253.005	236.621	263.907	225.701	233.301
ENSG00000000003	O43657	7105	TSPAN6	Tetraspanin-6 OS=Homo sapiens (Human) OX=9606 GN=TSPAN6 PE=1 SV=1 source=Uniprot,https://www.uniprot.org/uniprot/O43657	27.5	65.9986	65.385	76.2183	125.245	39.8669	82.2521	88.5681	90.4996	104.718	94.1507	96.7511	94.0356	62.348	80.4484	72.6458	53.2476	30.6245	40.907	48.6196	43.2795	53.7932	82.8815	72.8517	55.7477
ENSG00000171566	O43660	5356	PLRG1	Pleiotropic regulator 1 OS=Homo sapiens (Human) OX=9606 GN=PLRG1 PE=1 SV=1 source=Uniprot,https://www.uniprot.org/uniprot/O43660	57.2	274.523	226.512	240.402	237.879	234.369	200.829	226.998	210.858	216.007	199.161	202.651	198.846	238.232	220.759	215.161	233.156	214.064	198.594	229.575	228.726	226.598	264.641	212.645	202.088
ENSG00000198901	O43663	9055	PRC1	Protein regulator of cytokinesis 1 OS=Homo sapiens (Human) OX=9606 GN=PRC1 PE=1 SV=2 source=Uniprot,https://www.uniprot.org/uniprot/O43663	71.6	58.909	63.2713	92.4384	40.763	84.9231	30.9012	53.569	42.4563	42.7488	55.9302	50.6737	34.7041	24.1821	14.6762	13.7362	22.0897	27.4603	13.7565	24.1744	33.9273	32.6642	30.0432	17.6228	10.4148
ENSG00000010244	O43670	7756	ZNF207	BUB3-interacting and GLEBS motif-containing protein ZNF207 OS=Homo sapiens (Human) OX=9606 GN=ZNF207 PE=1 SV=1 source=Uniprot,https://www.uniprot.org/uniprot/O43670	50.7	738.961	762.31	888.266	707.006	722.068	613.401	743.428	629.592	683.081	730.85	674.51	672.75	624.9	705.979	617.96	657.344	649.368	600.441	733.482	770.695	740.512	823.294	682.263	723.432
ENSG00000136521	O43674	4711	NDUFB5	NADH dehydrogenase [ubiquinone] 1 beta subcomplex subunit 5, mitochondrial OS=Homo sapiens (Human) OX=9606 GN=NDUFB5 PE=1 SV=1 source=Uniprot,https://www.uniprot.org/uniprot/O43674	21.7	160.65	165.825	177.69	216.441	208.779	157.274	168.694	128.445	168.385	145.327	149.099	155.267	239.716	217.652	190.086	342.154	330.793	258.265	334.885	214.06	221.121	201.032	182.947	173.181
ENSG00000119013	O43676	4709	NDUFB3	NADH dehydrogenase [ubiquinone] 1 beta subcomplex subunit 3 OS=Homo sapiens (Human) OX=9606 GN=NDUFB3 PE=1 SV=3 source=Uniprot,https://www.uniprot.org/uniprot/O43676	11.4	175.815	202.294	191.332	273.449	265.294	278.042	189.881	168.816	207.249	230.578	185.286	200.524	300.431	296.759	317.767	435.12	457.533	398.65	362.401	265.653	262.028	219.429	216.367	225.37
ENSG00000109390	O43677	4717	NDUFC1	NADH dehydrogenase [ubiquinone] 1 subunit C1, mitochondrial OS=Homo sapiens (Human) OX=9606 GN=NDUFC1 PE=1 SV=1 source=Uniprot,https://www.uniprot.org/uniprot/O43677	8.7	387.446	57.9822	122.828	140.384	129.584	206.074	230.782	163.844	247.43	149.068	221.503	218.562	279.584	309.651	270.971	175.814	341.89	339.556	222.022	181.758	236.707	468.127	248.406	229.299
ENSG00000131495	O43678	4695	NDUFA2	NADH dehydrogenase [ubiquinone] 1 alpha subcomplex subunit 2 OS=Homo sapiens (Human) OX=9606 GN=NDUFA2 PE=1 SV=3 source=Uniprot,https://www.uniprot.org/uniprot/O43678	10.9	394.973	480.239	401.835	520.165	536.256	529.54	397.981	368.695	420.062	392.641	361.03	405.077	551.045	493.249	632.976	831.771	699.563	644.513	665.785	574.079	495.286	462.129	451.25	476.808
ENSG00000169744	O43679	9079	LDB2	LIM domain-binding protein 2 OS=Homo sapiens (Human) OX=9606 GN=LDB2 PE=1 SV=1 source=Uniprot,https://www.uniprot.org/uniprot/O43679	42.8	1.01184	7.4167	5.2051	2.80101	6.27108	4.16895	1.72251	4.8302	3.39092	1.46875	1.86843	2.1595	7.3514	6.51222	3.91529	14.9868	19.9996	7.3305	19.2013	6.86842	6.77419	0.857933	2.27669	2.29223
ENSG00000198356	O43681	439	GET3	ATPase ASNA1 OS=Homo sapiens (Human) OX=9606 GN=ASNA1 PE=1 SV=2 source=Uniprot,https://www.uniprot.org/uniprot/O43681	38.8	257.109	305.93	294.319	262.324	306.574	247.195	286.981	275.648	270.576	321.746	321.162	291.446	220.357	252.441	238.408	304.069	353.767	293.861	332.6	360.792	315.164	375.17	309.48	293.635
ENSG00000154473	O43684	9184	BUB3	Mitotic checkpoint protein BUB3 OS=Homo sapiens (Human) OX=9606 GN=BUB3 PE=1 SV=1 source=Uniprot,https://www.uniprot.org/uniprot/O43684	37.1	797.878	737.796	809.622	783.222	742.726	744.22	819.36	774.024	806.996	844.37	761.286	795.312	735.535	782.423	737.38	710.269	768.9	701.229	819.222	798.024	824.757	826.427	744.052	787.819
ENSG00000130402	O43707	81	ACTN4	Alpha-actinin-4 OS=Homo sapiens (Human) OX=9606 GN=ACTN4 PE=1 SV=2 source=Uniprot,https://www.uniprot.org/uniprot/O43707	104.8	250.719	315.476	280.08	260.018	225.813	254.753	360.774	244.422	309.502	298.884	375.108	392.311	219.707	207.589	219.045	214.901	196.367	183.998	193.937	193.441	196.201	224.141	266.413	239.119
ENSG00000100577	O43708	2954	GSTZ1	Maleylacetoacetate isomerase OS=Homo sapiens (Human) OX=9606 GN=GSTZ1 PE=1 SV=3 source=Uniprot,https://www.uniprot.org/uniprot/O43708	24.2	86.2228	105.366	79.2968	51.3963	80.0618	56.6979	74.5447	54.6499	62.1649	56.5935	63.3356	63.7911	57.4827	68.1162	64.6323	50.7196	77.7454	63.4887	55.2367	87.7531	70.9478	79.8332	63.244	59.9998
ENSG00000071462	O43709	114049	BUD23	Probable 18S rRNA (guanine-N(7))-methyltransferase OS=Homo sapiens (Human) OX=9606 GN=BUD23 PE=1 SV=2 source=Uniprot,https://www.uniprot.org/uniprot/O43709	31.9	73.6437	127.468	128.858	79.4348	86.8408	71.6944	88.8891	71.0463	68.2414	103.97	71.7176	72.0632	65.16	72.1381	54.8519	65.1401	69.9123	68.126	64.2326	83.4038	91.6719	54.2992	73.4354	52.6588
ENSG00000170855	O43715	51499	TRIAP1	TP53-regulated inhibitor of apoptosis 1 OS=Homo sapiens (Human) OX=9606 GN=TRIAP1 PE=1 SV=1 source=Uniprot,https://www.uniprot.org/uniprot/O43715	8.8	172.729	186.311	199.705	203.614	176.767	123.616	151.884	133.983	140.431	122.967	150.112	137.53	139.749	130.965	91.7707	204.774	163.729	159.546	215.573	198.908	209.022	155.196	152.784	131.001
ENSG00000257218	O43716	283459	GATC	Glutamyl-tRNA(Gln) amidotransferase subunit C, mitochondrial OS=Homo sapiens (Human) OX=9606 GN=GATC PE=1 SV=1 source=Uniprot,https://www.uniprot.org/uniprot/O43716	15.1	73.4063	77.2301	72.6556	97.5899	75.5349	87.3148	70.3397	81.9532	79.6779	72.3456	86.2168	85.7533	79.7595	77.372	77.1417	100.448	78.3415	91.3689	88.3663	79.1267	73.4078	69.6381	86.8129	77.1743
ENSG00000102241	O43719	27336	HTATSF1	HIV Tat-specific factor 1 OS=Homo sapiens (Human) OX=9606 GN=HTATSF1 PE=1 SV=1 source=Uniprot,https://www.uniprot.org/uniprot/O43719	85.8	382.265	402.323	379.054	370.018	338.689	300.415	346.452	293.646	317.831	326.082	314.911	294.526	333.862	309.952	312.301	328.513	297.955	306.546	345.403	343.216	319.108	327.902	287.418	305.294
ENSG00000131791	O43741	5565	PRKAB2	5'-AMP-activated protein kinase subunit beta-2 OS=Homo sapiens (Human) OX=9606 GN=PRKAB2 PE=1 SV=1 source=Uniprot,https://www.uniprot.org/uniprot/O43741	30.3	30.5511	33.2855	23.0704	21.2968	30.7586	22.7516	32.8155	29.7816	25.9686	25.8429	23.5684	26.5126	26.2927	28.2804	23.5114	23.9442	39.1851	27.4547	32.6548	41.6259	29.8747	39.8364	28.7959	29.4312
ENSG00000166747	O43747	164	AP1G1	AP-1 complex subunit gamma-1 OS=Homo sapiens (Human) OX=9606 GN=AP1G1 PE=1 SV=5 source=Uniprot,https://www.uniprot.org/uniprot/O43747	91.3	207.352	219.201	243.572	197.521	201.015	184.316	205.344	203.659	204.993	215.521	216.844	194.352	200.435	225.15	202.488	241.241	245.534	220.086	256.581	217.02	230.166	253.978	229.544	203.946
ENSG00000135823	O43752	10228	STX6	Syntaxin-6 OS=Homo sapiens (Human) OX=9606 GN=STX6 PE=1 SV=1 source=Uniprot,https://www.uniprot.org/uniprot/O43752	29.2	90.4061	74.9184	46.3521	59.2466	62.4366	68.1261	86.9158	67.9595	71.9191	73.8272	81.0234	94.1013	83.8693	83.7937	97.6182	89.6281	113.459	97.1171	104.768	95.5019	91.5665	156.699	99.6368	118.192
ENSG00000100321	O43759	9145	SYNGR1	Synaptogyrin-1 OS=Homo sapiens (Human) OX=9606 GN=SYNGR1 PE=1 SV=2 source=Uniprot,https://www.uniprot.org/uniprot/O43759	25.4	114.49	127.249	115.94	104.294	127.645	133.937	121.448	191.421	114.625	94.8505	173.971	105.63	181.367	118.833	114.815	173.4	219.236	199.822	205.017	182.532	135.935	260.095	170.428	165.653
ENSG00000108639	O43760	9144	SYNGR2	Synaptogyrin-2 OS=Homo sapiens (Human) OX=9606 GN=SYNGR2 PE=1 SV=1 source=Uniprot,https://www.uniprot.org/uniprot/O43760	24.8	55.0764	63.5371	69.8149	43.592	48.9638	40.8146	41.2096	39.6806	35.3325	30.2807	42.8695	27.144	25.6185	20.1816	16.147	28.344	45.8748	28.8136	26.7544	24.7482	20.3073	34.1962	25.9157	25.5229
ENSG00000104969	O43765	6449	SGTA	Small glutamine-rich tetratricopeptide repeat-containing protein alpha OS=Homo sapiens (Human) OX=9606 GN=SGTA PE=1 SV=1 source=Uniprot,https://www.uniprot.org/uniprot/O43765	34	635.84	685.654	595.18	638.141	588.101	579.462	656.26	587.355	602.924	660.737	652.852	641.837	763.605	817.352	793.393	817.168	782.009	716.823	870.892	758.746	701.929	877.148	732.628	740.044
ENSG00000143420	O43768	2029	ENSA	Alpha-endosulfine OS=Homo sapiens (Human) OX=9606 GN=ENSA PE=1 SV=1 source=Uniprot,https://www.uniprot.org/uniprot/O43768	13.4	320.099	243.999	372.977	345.383	260.261	300.192	315.49	271.096	328.585	281.148	290.666	317.219	366.596	364.451	313.284	305.307	241.682	238.524	251.151	210.571	264.933	222.757	269.663	264.365
ENSG00000178537	O43772	788	SLC25A20	Mitochondrial carnitine/acylcarnitine carrier protein OS=Homo sapiens (Human) OX=9606 GN=SLC25A20 PE=1 SV=1 source=Uniprot,https://www.uniprot.org/uniprot/O43772	32.9	81.5616	82.385	76.9348	91.0306	98.7535	98.598	88.5081	81.2315	84.6886	78.3896	85.0521	90.8881	92.4434	73.7332	74.8468	114.038	106.361	106.519	113.395	106.857	103.643	97.2122	100.646	102.781
ENSG00000134440	O43776	4677	NARS1	Asparagine--tRNA ligase, cytoplasmic OS=Homo sapiens (Human) OX=9606 GN=NARS1 PE=1 SV=1 source=Uniprot,https://www.uniprot.org/uniprot/O43776	62.9	641.881	704.884	633.823	591.047	614.645	637.289	587.396	665.093	674.867	600.956	612.854	707.315	452.43	562.859	596.933	566.058	584.038	610.031	573.638	571.524	556.96	635.531	552.494	577.19
ENSG00000128641	O43795	4430	MYO1B	Unconventional myosin-Ib OS=Homo sapiens (Human) OX=9606 GN=MYO1B PE=1 SV=3 source=Uniprot,https://www.uniprot.org/uniprot/O43795	131.9	123.042	108.465	118.172	94.3078	84.2533	69.1366	129.108	78.3834	97.0886	84.0786	134.361	96.6994	80.6216	73.072	63.6991	54.5385	53.663	44.511	49.3371	51.9511	54.7885	56.5921	74.2239	45.3242
ENSG00000176101	O43805	8636	SSNA1	Sjoegren syndrome nuclear autoantigen 1 OS=Homo sapiens (Human) OX=9606 GN=SSNA1 PE=1 SV=2 source=Uniprot,https://www.uniprot.org/uniprot/O43805	13.6	188.545	238.87	218.996	193.715	187.673	149.532	175.46	165.132	148.85	172.347	160.709	139.721	99.5082	87.6108	99.3865	114.467	100.81	93.5952	108.312	115.246	107.727	90.7695	78.085	92.127
ENSG00000100372	O43808	10478	SLC25A17	Peroxisomal membrane protein PMP34 OS=Homo sapiens (Human) OX=9606 GN=SLC25A17 PE=1 SV=1 source=Uniprot,https://www.uniprot.org/uniprot/O43808	34.5	42.1574	28.6437	39.2457	13.4368	24.3539	16.878	28.4885	22.681	20.0552	25.1729	25.3291	20.2386	14.5323	24.6829	22.6769	18.5382	27.7257	19.2741	21.2344	30.1956	30.3247	47.1831	22.6056	21.1402
ENSG00000167005	O43809	11051	NUDT21	Cleavage and polyadenylation specificity factor subunit 5 OS=Homo sapiens (Human) OX=9606 GN=NUDT21 PE=1 SV=1 source=Uniprot,https://www.uniprot.org/uniprot/O43809	26.2	599.686	660.076	672.085	425.028	639.977	532.116	542.677	446.07	464.736	482.374	476.441	456.846	420.934	548.332	574.915	438.3	549.516	428.826	475.167	598.504	573.417	612.149	468.8	484.945
ENSG00000115365	O43813	10314	LANCL1	Glutathione S-transferase LANCL1 OS=Homo sapiens (Human) OX=9606 GN=LANCL1 PE=1 SV=1 source=Uniprot,https://www.uniprot.org/uniprot/O43813	45.3	280.007	342.621	328.237	322.609	354.213	309.113	299.8	334	310.62	322.567	299.038	302.545	294.795	303.38	284.171	347.202	366.85	324.48	351.374	353.743	349.145	297.583	311.876	322.738
ENSG00000115808	O43815	6801	STRN	Striatin OS=Homo sapiens (Human) OX=9606 GN=STRN PE=1 SV=4 source=Uniprot,https://www.uniprot.org/uniprot/O43815	86.1	52.3485	55.7523	60.6697	63.4407	54.2788	50.0484	56.6836	55.5517	61.8459	63.0607	60.0889	57.309	54.3615	58.5459	48.7138	63.3344	58.5899	58.0614	59.7137	54.3485	55.0255	50.0704	50.6153	45.9602
ENSG00000114767	O43818	9136	RRP9	U3 small nucleolar RNA-interacting protein 2 OS=Homo sapiens (Human) OX=9606 GN=RRP9 PE=1 SV=1 source=Uniprot,https://www.uniprot.org/uniprot/O43818	51.8	83.9253	78.6811	96.1489	83.8143	81.9444	60.3372	75.2082	75.5876	71.3071	75.7217	72.7745	64.4241	65.4406	59.6291	49.5016	78.1927	73.7373	62.4765	83.405	81.5312	88.4342	65.8796	70.0094	64.3653
ENSG00000105127	O43823	10270	AKAP8	A-kinase anchor protein 8 OS=Homo sapiens (Human) OX=9606 GN=AKAP8 PE=1 SV=1 source=Uniprot,https://www.uniprot.org/uniprot/O43823	76.1	152.859	164.353	175.769	171.065	143.454	159.523	165.53	174.384	164.37	155.499	165.542	154.02	153.357	169.12	149.707	143.466	124.861	129.175	144.446	139.986	150.715	143.411	152.765	147.498
ENSG00000178605	O43824	8225	GTPBP6	Putative GTP-binding protein 6 OS=Homo sapiens (Human) OX=9606 GN=GTPBP6 PE=2 SV=4 source=Uniprot,https://www.uniprot.org/uniprot/O43824	56.9	58.5617	54.6153	63.7478	63.2166	63.007	48.3492	51.4117	42.7655	47.5006	48.1761	52.6292	47.0433	43.4401	38.0882	38.8053	48.5146	43.9894	46.9964	47.723	41.8194	46.678	44.8709	42.5386	38.09
ENSG00000198081	O43829	7541	ZBTB14	Zinc finger and BTB domain-containing protein 14 OS=Homo sapiens (Human) OX=9606 GN=ZBTB14 PE=1 SV=2 source=Uniprot,https://www.uniprot.org/uniprot/O43829	50.9	53.3229	64.5553	71.0183	70.7506	81.3975	71.1556	64.1523	75.97	77.5191	76.9204	93.029	84.931	62.9432	84.4917	74.5761	71.6485	79.2871	70.3209	59.4368	65.0506	74.4367	51.9033	81.4029	87.7742
ENSG00000101365	O43837	3420	IDH3B	Isocitrate dehydrogenase [NAD] subunit beta, mitochondrial OS=Homo sapiens (Human) OX=9606 GN=IDH3B PE=1 SV=2 source=Uniprot,https://www.uniprot.org/uniprot/O43837	42.2	130.94	133.382	138.247	143.472	152.177	136.705	139.972	123.203	146.1	138.42	147.423	144.928	194.797	182.992	176.533	239.851	229.644	218.278	277.077	216.821	213.847	219.948	214.992	192.611
ENSG00000078618	O43847	4898	NRDC	Nardilysin OS=Homo sapiens (Human) OX=9606 GN=NRDC PE=1 SV=3 source=Uniprot,https://www.uniprot.org/uniprot/O43847	131.6	156.448	155.959	182.554	127.266	122.312	103.81	136.952	103.792	121.843	136.848	125.541	116.733	121.965	119.907	106.427	118.375	109.065	98.3781	106.783	101.312	110.889	114.245	87.1007	92.1828
ENSG00000128595	O43852	813	CALU	Calumenin OS=Homo sapiens (Human) OX=9606 GN=CALU PE=1 SV=2 source=Uniprot,https://www.uniprot.org/uniprot/O43852	37.1	789.59	1104.27	967.058	1005.09	972.744	1059.74	897.07	1062.64	928.306	786.97	847.342	862.015	770.381	688.552	817.789	839.278	746.026	717.967	619.762	630.45	664.304	526.741	635.012	562.566
ENSG00000164176	O43854	10085	EDIL3	EGF-like repeat and discoidin I-like domain-containing protein 3 OS=Homo sapiens (Human) OX=9606 GN=EDIL3 PE=1 SV=1 source=Uniprot,https://www.uniprot.org/uniprot/O43854	53.7	18.738	21.4314	16.3336	21.5681	16.3325	22.7878	21.0141	15.6994	20.2734	21.3906	12.198	16.3961	17.3574	17.058	27.5091	13.9213	13.7963	15.4258	16.0156	23.3599	20.5633	23.7703	18.661	17.5814
ENSG00000012232	O43909	2137	EXTL3	Exostosin-like 3 OS=Homo sapiens (Human) OX=9606 GN=EXTL3 PE=1 SV=1 source=Uniprot,https://www.uniprot.org/uniprot/O43909	104.7	18.4127	21.4841	19.7356	19.4664	20.9052	19.5973	17.5575	19.1808	19.0816	15.8171	19.4408	18.2853	22.5844	20.2363	21.1783	29.1398	26.8777	24.5152	29.61	24.7875	26.7874	22.7823	22.2065	21.9814
ENSG00000164815	O43913	5001	ORC5	Origin recognition complex subunit 5 OS=Homo sapiens (Human) OX=9606 GN=ORC5 PE=1 SV=1 source=Uniprot,https://www.uniprot.org/uniprot/O43913	50.3	105.023	103.994	122.597	98.6654	99.7297	88.3507	90.2003	98.5958	95.0086	93.4972	86.3309	88.1594	82.9027	74.895	70.4462	86.3475	83.5175	72.8515	96.9076	97.1722	93.5204	93.6701	89.1582	85.9847
ENSG00000168653	O43920	4725	NDUFS5	NADH dehydrogenase [ubiquinone] iron-sulfur protein 5 OS=Homo sapiens (Human) OX=9606 GN=NDUFS5 PE=1 SV=3 source=Uniprot,https://www.uniprot.org/uniprot/O43920	12.5	191.724	252.54	280.333	486.688	318.855	398.645	258.067	293.364	333.756	240.808	312.514	323.565	519.403	423.845	449.704	910.356	494.624	587.907	466.791	346.11	448.577	234.933	357.777	326.02
ENSG00000156973	O43924	5147	PDE6D	Retinal rod rhodopsin-sensitive cGMP 3',5'-cyclic phosphodiesterase subunit delta OS=Homo sapiens (Human) OX=9606 GN=PDE6D PE=1 SV=1 source=Uniprot,https://www.uniprot.org/uniprot/O43924	17.4	192.838	159.566	207.303	167.483	170.503	165.371	192.857	230.769	208.098	199.425	239.285	191.568	211.56	263.014	195.185	207.55	230.859	203.368	224.324	226.628	279.326	273.695	249.857	235.302
ENSG00000115947	O43929	5000	ORC4	Origin recognition complex subunit 4 OS=Homo sapiens (Human) OX=9606 GN=ORC4 PE=1 SV=2 source=Uniprot,https://www.uniprot.org/uniprot/O43929	50.3	53.4639	69.8781	68.5695	50.3998	64.7501	38.2384	46.3402	45.1023	47.2082	50.624	39.8249	42.8707	47.9115	35.8873	33.6877	41.5691	47.7201	40.697	43.6115	53.0509	49.5487	42.9262	38.4276	41.2797
ENSG00000127980	O43933	5189	PEX1	Peroxisome biogenesis factor 1 OS=Homo sapiens (Human) OX=9606 GN=PEX1 PE=1 SV=1 source=Uniprot,https://www.uniprot.org/uniprot/O43933	142.8	15.1084	15.2779	16.8223	10.5484	9.94004	10.1135	13.7332	11.6379	12.2983	13.9861	14.7519	11.3956	12.7278	14.2132	11.345	12.3899	10.1272	11.0339	13.4974	13.4658	15.3588	14.2841	12.2938	10.8403
ENSG00000164754	O60216	5885	RAD21	Double-strand-break repair protein rad21 homolog OS=Homo sapiens (Human) OX=9606 GN=RAD21 PE=1 SV=2 source=Uniprot,https://www.uniprot.org/uniprot/O60216	71.6	350.51	271.323	367.186	242.577	314.456	242.48	302.212	244.17	240.957	274.159	254.91	227.243	185.66	180.811	161.884	169.421	205.619	169.624	171.287	238.692	221.33	273.006	198.963	183.085
ENSG00000126953	O60220	1678	TIMM8A	Mitochondrial import inner membrane translocase subunit Tim8 A OS=Homo sapiens (Human) OX=9606 GN=TIMM8A PE=1 SV=1 source=Uniprot,https://www.uniprot.org/uniprot/O60220	11	232.76	144.976	193.183	83.5109	191.473	109.657	164.66	88.96	125.51	136.576	118.404	114.419	128.716	117.26	116.358	105.702	284.559	180.53	171.542	275.495	215.787	231.894	166.15	146.06
ENSG00000160145	O60229	8997	KALRN	Kalirin OS=Homo sapiens (Human) OX=9606 GN=KALRN PE=1 SV=3 source=Uniprot,https://www.uniprot.org/uniprot/O60229	340	17.6216	17.1419	16.7119	20.7765	18.1039	19.7015	22.3802	22.2306	21.9006	22.9838	23.2744	19.9713	33.0325	38.1804	36.3917	29.4701	28.3043	23.7995	29.0593	29.8216	30.005	38.1913	32.8993	35.3854
ENSG00000204560	O60231	8449	DHX16	Pre-mRNA-splicing factor ATP-dependent RNA helicase DHX16 OS=Homo sapiens (Human) OX=9606 GN=DHX16 PE=1 SV=2 source=Uniprot,https://www.uniprot.org/uniprot/O60231	119.2	105.038	101.693	102.87	87.2565	104.594	107.992	103.273	100.012	100.69	111.707	102.131	106.232	80.6322	89.8767	93.9227	74.863	84.7131	90.9634	93.2808	98.3119	91.8539	96.6033	92.5996	99.6151
ENSG00000173465	O60232	10534	ZNRD2	Protein ZNRD2 OS=Homo sapiens (Human) OX=9606 GN=ZNRD2 PE=1 SV=1 source=Uniprot,https://www.uniprot.org/uniprot/O60232	21.5	34.0665	34.9238	31.2749	28.7262	28.5262	26.3338	31.9321	30.2752	29.1054	27.3364	27.6593	31.3466	30.3387	26.7327	25.8723	27.8024	30.4578	28.6646	46.3469	35.2556	34.5308	33.7788	28.2519	31.1858
ENSG00000077157	O60237	4660	PPP1R12B	Protein phosphatase 1 regulatory subunit 12B OS=Homo sapiens (Human) OX=9606 GN=PPP1R12B PE=1 SV=2 source=Uniprot,https://www.uniprot.org/uniprot/O60237	110.3	5.74515	6.54087	5.77832	4.88578	6.9971	4.17572	5.1864	4.96022	4.22644	6.63333	5.77258	4.32492	5.99009	4.6109	4.91114	6.25219	8.58836	5.07622	5.07601	6.49705	5.57589	5.75268	4.55635	4.25322
ENSG00000136720	O60243	9394	HS6ST1	Heparan-sulfate 6-O-sulfotransferase 1 OS=Homo sapiens (Human) OX=9606 GN=HS6ST1 PE=1 SV=5 source=Uniprot,https://www.uniprot.org/uniprot/O60243	48.2	18.3408	22.0535	16.3485	20.1508	21.5617	26.3444	17.1414	15.5472	21.6844	15.6023	13.0878	20.7904	19.0945	15.743	28.848	20.4257	25.1369	30.9143	20.3717	28.7401	33.5203	21.34	16.1916	22.3108
ENSG00000180182	O60244	9282	MED14	Mediator of RNA polymerase II transcription subunit 14 OS=Homo sapiens (Human) OX=9606 GN=MED14 PE=1 SV=2 source=Uniprot,https://www.uniprot.org/uniprot/O60244	160.5	23.7593	26.9698	26.1327	28.0546	27.6566	26.5642	22.6827	26.9528	27.1162	25.8475	24.2978	26.8192	26.237	22.9346	24.8667	27.5199	26.6181	28.0698	24.959	28.2895	27.3334	21.4706	23.8003	26.027
ENSG00000141127	O60256	5636	PRPSAP2	Phosphoribosyl pyrophosphate synthase-associated protein 2 OS=Homo sapiens (Human) OX=9606 GN=PRPSAP2 PE=1 SV=1 source=Uniprot,https://www.uniprot.org/uniprot/O60256	40.9	239.687	256.637	237.678	214.194	227.225	215.926	218.449	211.734	229.977	220.102	245.717	217.444	223.534	220.286	222.284	217.814	223.408	214.184	225.985	215.648	208.869	236.09	224.217	225.085
ENSG00000153147	O60264	8467	SMARCA5	SWI/SNF-related matrix-associated actin-dependent regulator of chromatin subfamily A member 5 OS=Homo sapiens (Human) OX=9606 GN=SMARCA5 PE=1 SV=1 source=Uniprot,https://www.uniprot.org/uniprot/O60264	121.8	557.787	411.372	478.121	478.134	470.33	546.451	477.2	455.851	461.423	469.573	506.441	451.933	428.196	424.177	437.151	372.442	360.05	384.448	354.991	389.417	404.771	392.471	402.035	399.414
ENSG00000138031	O60266	109	ADCY3	Adenylate cyclase type 3 OS=Homo sapiens (Human) OX=9606 GN=ADCY3 PE=1 SV=3 source=Uniprot,https://www.uniprot.org/uniprot/O60266	128.9	12.0268	10.4015	10.1917	12.4607	14.2387	8.69197	11.9964	12.2049	10.6871	12.5756	13.3672	10.7848	10.2708	6.93627	8.70216	10.305	10.8195	11.6774	12.5698	15.5656	12.245	13.3007	12.6393	11.6523
ENSG00000135709	O60268	9764	KIAA0513	Uncharacterized protein KIAA0513 OS=Homo sapiens (Human) OX=9606 GN=KIAA0513 PE=1 SV=1 source=Uniprot,https://www.uniprot.org/uniprot/O60268	46.6	58.3846	66.0603	58.3414	67.0864	65.2131	79.9199	64.2546	69.3149	80.4261	68.3663	64.545	64.692	114.609	154.371	155.027	187.441	221.876	197.374	241.515	231.749	230.444	158.455	150.711	169.599
ENSG00000008294	O60271	9043	SPAG9	C-Jun-amino-terminal kinase-interacting protein 4 OS=Homo sapiens (Human) OX=9606 GN=SPAG9 PE=1 SV=4 source=Uniprot,https://www.uniprot.org/uniprot/O60271	146.1	113.881	106.169	111.896	128.49	118.723	122.479	132.03	129.336	132.19	133.474	139.676	131.118	125.995	144.084	134.932	129.876	124.678	116.452	125.438	118.73	122.349	132.494	126.946	125.797
ENSG00000188994	O60281	23036	ZNF292	Zinc finger protein 292 OS=Homo sapiens (Human) OX=9606 GN=ZNF292 PE=1 SV=3 source=Uniprot,https://www.uniprot.org/uniprot/O60281	304.6	67.0343	57.6163	60.9536	55.2895	58.9712	46.9375	61.4418	63.7285	53.4685	57.8853	56.8342	46.6021	51.4176	50.8272	41.9609	42.0927	46.8222	35.4236	44.5507	54.1138	51.6745	56.8474	51.8852	51.662
ENSG00000168280	O60282	3800	KIF5C	Kinesin heavy chain isoform 5C OS=Homo sapiens (Human) OX=9606 GN=KIF5C PE=1 SV=1 source=Uniprot,https://www.uniprot.org/uniprot/O60282	109.4	222.565	206.231	220.235	272.566	239.982	257.5	254.52	296.453	288.789	273.169	252.648	239.359	577.921	727.451	584.541	507.07	526.392	454.031	493.562	486.873	488.781	528.022	467.254	480.825
ENSG00000147488	O60284	9705	ST18	Suppression of tumorigenicity 18 protein OS=Homo sapiens (Human) OX=9606 GN=ST18 PE=1 SV=1 source=Uniprot,https://www.uniprot.org/uniprot/O60284	115.1	4.2997	3.53712	1.75699	5.35838	3.54438	7.45504	5.6209	3.63392	6.36726	5.33671	8.81862	6.87486	6.01407	2.73372	7.17804	6.4992	8.42548	9.10034	5.37687	2.97009	4.10997	3.71797	3.23591	4.8928
ENSG00000142207	O60287	9875	URB1	Nucleolar pre-ribosomal-associated protein 1 OS=Homo sapiens (Human) OX=9606 GN=URB1 PE=1 SV=4 source=Uniprot,https://www.uniprot.org/uniprot/O60287	254.2	21.1136	20.1666	21.8698	19.7382	20.6741	18.2339	17.4861	18.5636	16.2808	16.5854	15.7679	14.945	16.2572	13.8827	15.7102	18.3979	15.779	15.7679	18.0369	18.3633	17.1858	15.2328	16.1918	14.9076
ENSG00000105738	O60292	23094	SIPA1L3	Signal-induced proliferation-associated 1-like protein 3 OS=Homo sapiens (Human) OX=9606 GN=SIPA1L3 PE=1 SV=3 source=Uniprot,https://www.uniprot.org/uniprot/O60292	194.5	8.95629	9.93536	9.42274	8.35584	7.89997	8.22738	10.0431	8.68645	9.79323	9.78146	9.11612	9.75399	9.65439	9.65749	8.90197	8.98977	8.89028	7.57748	9.57467	10.5901	10.3118	10.4491	10.2778	11.2515
ENSG00000133858	O60293	196441	ZFC3H1	Zinc finger C3H1 domain-containing protein OS=Homo sapiens (Human) OX=9606 GN=ZFC3H1 PE=1 SV=3 source=Uniprot,https://www.uniprot.org/uniprot/O60293	226.2	8.65237	6.03184	7.81287	6.53291	6.12171	5.73589	6.42615	6.14778	5.38313	5.94363	6.4693	5.39421	5.3543	5.83695	5.07205	5.35219	5.72884	5.2905	5.81059	5.97697	6.16242	5.63741	6.22233	5.23784
ENSG00000168806	O60294	9836	LCMT2	tRNA wybutosine-synthesizing protein 4 OS=Homo sapiens (Human) OX=9606 GN=LCMT2 PE=1 SV=3 source=Uniprot,https://www.uniprot.org/uniprot/O60294	75.6	14.8295	23.4095	24.8342	17.1019	15.9224	18.4925	15.124	18.724	21.5712	16.9582	18.975	19.5397	15.5041	17.2746	18.3876	16.4523	16.0864	21.8503	17.483	21.1274	25.5636	14.2541	17.248	17.123
ENSG00000021776	O60306	9716	AQR	RNA helicase aquarius OS=Homo sapiens (Human) OX=9606 GN=AQR PE=1 SV=4 source=Uniprot,https://www.uniprot.org/uniprot/O60306	171.2	155.537	136.66	151.952	147.811	139.92	140.076	146.426	144.673	147.243	145.146	156.365	145.483	127.275	133.822	125.281	131.769	130.289	133.675	149.248	147.818	141.739	151.681	147.226	142.458
ENSG00000116198	O60308	9731	CEP104	Centrosomal protein of 104 kDa OS=Homo sapiens (Human) OX=9606 GN=CEP104 PE=1 SV=1 source=Uniprot,https://www.uniprot.org/uniprot/O60308	104.4	6.99606	7.59753	7.03139	7.62003	7.1991	6.8641	7.45966	6.68685	7.49054	8.10432	7.14669	7.45888	7.00391	8.02523	7.61667	6.37638	7.44839	7.31041	8.93737	8.24113	8.66052	9.323	7.20257	7.56615
ENSG00000198836	O60313	4976	OPA1	Dynamin-like 120 kDa protein, mitochondrial OS=Homo sapiens (Human) OX=9606 GN=OPA1 PE=1 SV=3 source=Uniprot,https://www.uniprot.org/uniprot/O60313	111.6	191.943	211.818	219.1	240.469	232.831	214.558	214.411	186.356	218.829	211.235	228.086	214.821	318.497	332.039	309.917	382.601	381.493	328.964	418.444	359.737	349.077	320.273	329.789	327.622
ENSG00000169554	O60315	9839	ZEB2	Zinc finger E-box-binding homeobox 2 OS=Homo sapiens (Human) OX=9606 GN=ZEB2 PE=1 SV=1 source=Uniprot,https://www.uniprot.org/uniprot/O60315	136.4	36.5538	30.9709	22.5124	31.1157	30.3077	26.5205	54.6665	40.0364	45.7498	42.7029	59.1778	42.3412	47.8734	36.2146	37.2979	60.3298	68.8346	55.4375	53.4691	42.1457	54.9031	40.4273	39.6355	37.4317
ENSG00000160294	O60318	8888	MCM3AP	Germinal-center associated nuclear protein OS=Homo sapiens (Human) OX=9606 GN=MCM3AP PE=1 SV=2 source=Uniprot,https://www.uniprot.org/uniprot/O60318	218.3	45.6979	42.5018	39.0678	43.0259	41.741	41.71	42.3703	40.0053	37.6789	39.4454	38.9873	37.078	38.3153	40.798	35.816	34.9318	32.7729	37.6734	35.6632	37.0724	36.1485	36.7721	35.4171	36.0208
ENSG00000186111	O60331	23396	PIP5K1C	Phosphatidylinositol 4-phosphate 5-kinase type-1 gamma OS=Homo sapiens (Human) OX=9606 GN=PIP5K1C PE=1 SV=2 source=Uniprot,https://www.uniprot.org/uniprot/O60331	73.2	62.0825	88.2757	72.8021	55.2607	68.2566	48.3478	66.8461	59.6623	56.8354	64.6451	65.9563	61.3722	62.7934	66.6604	68.866	67.0514	79.5197	57.7301	77.5736	82.6177	70.6784	95.1988	74.8323	76.2509
ENSG00000054523	O60333	23095	KIF1B	Kinesin-like protein KIF1B OS=Homo sapiens (Human) OX=9606 GN=KIF1B PE=1 SV=5 source=Uniprot,https://www.uniprot.org/uniprot/O60333	204.3	22.6546	22.111	18.6455	19.323	18.1427	19.6915	20.3141	17.7604	20.0514	19.7597	18.2411	22.114	16.3054	17.1515	18.6822	15.3949	15.6622	15.9043	13.8891	15.9883	15.0189	16.2248	14.0415	15.8841
ENSG00000145495	O60337	10299	MARCHF6	E3 ubiquitin-protein ligase MARCH6 OS=Homo sapiens (Human) OX=9606 GN=MARCH6 PE=1 SV=2 source=Uniprot,https://www.uniprot.org/uniprot/O60337	102.5	22.9887	27.6632	25.1824	27.8403	25.432	23.616	22.5391	24.9058	23.178	19.8326	25.5069	22.5199	31.2106	32.1202	31.8609	30.7471	26.3011	21.954	24.2743	28.14	25.0635	21.8527	24.1392	24.323
ENSG00000004487	O60341	23028	KDM1A	Lysine-specific histone demethylase 1A OS=Homo sapiens (Human) OX=9606 GN=KDM1A PE=1 SV=2 source=Uniprot,https://www.uniprot.org/uniprot/O60341	92.8	505.753	351.288	397.311	398.567	413.453	401.464	453.432	422.282	429.556	432.627	438.831	415.175	360.917	374.389	365.859	342.602	352.522	319.454	330.85	384.914	394.469	438.881	379.246	415.282
ENSG00000081913	O60346	23239	PHLPP1	PH domain leucine-rich repeat-containing protein phosphatase 1 OS=Homo sapiens (Human) OX=9606 GN=PHLPP1 PE=1 SV=3 source=Uniprot,https://www.uniprot.org/uniprot/O60346	184.6	9.59419	8.08086	6.39679	10.2293	10.6835	7.00979	7.28597	8.42691	6.20646	8.15842	6.86089	6.31469	4.36975	4.09139	5.66489	4.20935	3.29517	5.09435	4.46062	4.23498	5.04701	4.72217	3.81519	4.82501
O60361	O60361		NME2P1	Putative nucleoside diphosphate kinase OS=Homo sapiens (Human) OX=9606 GN=NME2P1 PE=5 SV=1 source=Uniprot,https://www.uniprot.org/uniprot/O60361	15.5	45.9936	73.817	56.5091	23.6169	35.4795	17.4553	38.5497	34.309	23.568	36.1569	31.088	19.875	26.9931	22.6076	18.1158	23.5434	37.3726	22.9287	28.9946	44.9217	54.4759	84.1287	30.862	19.307
ENSG00000149485	O60427	3992	FADS1	Acyl-CoA (8-3)-desaturase OS=Homo sapiens (Human) OX=9606 GN=FADS1 PE=1 SV=3 source=Uniprot,https://www.uniprot.org/uniprot/O60427	51.9	123.041	125.187	143.796	91.0251	90.461	81.1249	74.405	68.3197	71.3102	69.4847	63.5773	58.4988	89.2036	84.2242	88.3707	68.4103	75.5546	58.3445	59.7319	63.68	60.8275	52.224	48.8482	43.9284
ENSG00000105928	O60443	1687	GSDME	Gasdermin-E OS=Homo sapiens (Human) OX=9606 GN=GSDME PE=1 SV=2 source=Uniprot,https://www.uniprot.org/uniprot/O60443	54.5	56.4577	55.2677	42.4112	32.9592	38.3034	37.0354	56.7118	34.0244	50.9884	47.8037	48.6226	53.0849	53.0905	56.1983	54.7788	51.78	77.5318	60.8668	65.5343	68.6942	65.5846	87.8719	63.3562	70.1618
ENSG00000118257	O60462	8828	NRP2	Neuropilin-2 OS=Homo sapiens (Human) OX=9606 GN=NRP2 PE=1 SV=3 source=Uniprot,https://www.uniprot.org/uniprot/O60462	104.8	2.30393	1.85758	1.52374	3.16389	2.49033	3.06377	2.31776	2.35022	2.55273	2.22955	2.05166	2.02854	6.19573	5.14491	3.69118	2.5524	1.5708	2.2388	3.10853	1.64206	2.64387	2.34192	2.05157	2.31224
ENSG00000198162	O60476	10905	MAN1A2	Mannosyl-oligosaccharide 1,2-alpha-mannosidase IB OS=Homo sapiens (Human) OX=9606 GN=MAN1A2 PE=1 SV=1 source=Uniprot,https://www.uniprot.org/uniprot/O60476	73	24.1536	22.8427	32.4737	21.9692	23.231	17.8372	20.4814	18.913	18.6084	21.0853	19.2551	18.0047	20.4533	19.6371	18.112	22.6652	22.9453	19.9332	19.5715	20.2144	23.0006	22.5947	17.3992	16.0551
ENSG00000136040	O60486	10154	PLXNC1	Plexin-C1 OS=Homo sapiens (Human) OX=9606 GN=PLXNC1 PE=1 SV=1 source=Uniprot,https://www.uniprot.org/uniprot/O60486	175.6	5.41242	8.17933	5.60669	4.01786	4.98518	4.89427	8.63508	4.86947	6.30364	13.4105	11.5585	10.5312	4.33294	6.61638	5.93225	3.34847	3.35358	4.66434	3.56258	3.62692	5.76331	5.07577	5.70857	5.93004
ENSG00000068366	O60488	2182	ACSL4	Long-chain-fatty-acid--CoA ligase 4 OS=Homo sapiens (Human) OX=9606 GN=ACSL4 PE=1 SV=2 source=Uniprot,https://www.uniprot.org/uniprot/O60488	79.1	154.586	140.396	119.143	125.775	121.208	109.826	135.503	121.638	139.348	113.969	119.716	109.081	427.936	366.892	366.663	383.972	378.214	281.817	385.295	297.909	295.276	245.058	238.73	229.967
ENSG00000112335	O60493	8724	SNX3	Sorting nexin-3 OS=Homo sapiens (Human) OX=9606 GN=SNX3 PE=1 SV=3 source=Uniprot,https://www.uniprot.org/uniprot/O60493	18.8	284.739	420.87	341.741	445.339	390.571	362.741	329.555	357.382	395.657	414.849	376.731	418.03	291.105	295.574	326.847	351.617	322.406	317.966	405.719	345.908	354.264	334.254	355.214	369.611
ENSG00000198408	O60502	10724	OGA	Protein O-GlcNAcase OS=Homo sapiens (Human) OX=9606 GN=OGA PE=1 SV=2 source=Uniprot,https://www.uniprot.org/uniprot/O60502	102.8	209.577	209.245	189.278	196.101	212.438	212.186	250.246	227.843	237.414	257.902	274.395	264.064	216.715	253.368	275.096	192.73	180.594	195.86	199.225	216.457	208.975	259.605	231.356	248.717
ENSG00000120896	O60504	10174	SORBS3	Vinexin OS=Homo sapiens (Human) OX=9606 GN=SORBS3 PE=1 SV=2 source=Uniprot,https://www.uniprot.org/uniprot/O60504	75.3	48.3527	48.4047	46.8004	38.1685	44.9279	36.0225	45.276	44.6265	34.9228	39.2611	35.6369	33.9031	21.3704	22.3206	24.9234	25.3515	34.4894	31.3089	31.8468	32.6939	33.5072	41.6278	36.826	31.9948
ENSG00000135316	O60506	10492	SYNCRIP	Heterogeneous nuclear ribonucleoprotein Q OS=Homo sapiens (Human) OX=9606 GN=SYNCRIP PE=1 SV=2 source=Uniprot,https://www.uniprot.org/uniprot/O60506	69.6	597.212	591.591	666.328	664.245	613.697	683.537	591.266	674.964	649.112	640.618	656.857	659.441	670.021	719.889	745.93	792.173	722.466	705.206	754.66	786.108	758.766	728.824	719.861	756.495
ENSG00000169902	O60507	8460	TPST1	Protein-tyrosine sulfotransferase 1 OS=Homo sapiens (Human) OX=9606 GN=TPST1 PE=1 SV=1 source=Uniprot,https://www.uniprot.org/uniprot/O60507	42.2	17.5655	10.5182	8.69897	16.1326	10.3968	10.3059	16.2952	10.5397	11.7194	12.9998	11.4943	11.3853	12.4312	13.9738	16.0183	14.2597	9.03826	11.6714	14.5259	11.6407	13.2873	18.1182	12.0111	11.9371
ENSG00000168438	O60508	51362	CDC40	Pre-mRNA-processing factor 17 OS=Homo sapiens (Human) OX=9606 GN=CDC40 PE=1 SV=1 source=Uniprot,https://www.uniprot.org/uniprot/O60508	65.5	100.743	82.1246	97.3345	91.1566	85.7743	88.6332	88.2792	85.6445	84.742	86.1068	88.7968	82.2141	79.4468	79.4088	75.0216	80.3014	82.7127	73.3408	90.6719	90.0151	88.9328	82.6105	82.3444	79.3726
ENSG00000158850	O60512	8703	B4GALT3	Beta-1,4-galactosyltransferase 3 OS=Homo sapiens (Human) OX=9606 GN=B4GALT3 PE=1 SV=2 source=Uniprot,https://www.uniprot.org/uniprot/O60512	43.9	9.82363	1.57538	10.6911	10.7527	2.36571	10.6066	9.85318	10.6786	10.3684	10.7461	13.8565	10.8781	11.9925	10.9847	9.68056	14.0314	10.7363	13.8753	12.2828	10.2052	14.1581	12.3892	14.16	10.7653
ENSG00000137040	O60518	26953	RANBP6	Ran-binding protein 6 OS=Homo sapiens (Human) OX=9606 GN=RANBP6 PE=1 SV=2 source=Uniprot,https://www.uniprot.org/uniprot/O60518	124.6	68.9176	71.4391	74.8506	89.1783	75.0871	76.9256	79.2848	84.5211	82.9666	86.8671	87.0565	77.1691	115.69	134.961	120.21	133.892	133.305	127.996	143.745	138.686	136.888	127.62	121.6	126.61
ENSG00000165525	O60524	9147	NEMF	Nuclear export mediator factor NEMF OS=Homo sapiens (Human) OX=9606 GN=NEMF PE=1 SV=4 source=Uniprot,https://www.uniprot.org/uniprot/O60524	122.9	66.383	83.4112	60.7926	75.3954	70.7395	72.93	71.8868	72.6019	73.636	74.5411	76.8191	74.8273	82.4893	85.8712	91.1585	81.2142	73.8169	77.3734	75.3676	69.2164	67.9876	64.303	65.3436	61.0497
ENSG00000112699	O60547	2762	GMDS	GDP-mannose 4,6 dehydratase OS=Homo sapiens (Human) OX=9606 GN=GMDS PE=1 SV=1 source=Uniprot,https://www.uniprot.org/uniprot/O60547	41.9	85.6772	102.097	90.7137	93.7663	92.3756	85.2216	93.1992	96.4116	87.3089	103.286	90.0289	88.3064	101.344	102.433	94.1836	114.891	123.895	106.287	120.203	131.496	123.923	142.063	128.398	127.461
ENSG00000152465	O60551	9397	NMT2	Glycylpeptide N-tetradecanoyltransferase 2 OS=Homo sapiens (Human) OX=9606 GN=NMT2 PE=1 SV=1 source=Uniprot,https://www.uniprot.org/uniprot/O60551	56.9	81.4209	62.2108	75.8131	105.085	86.4052	79.7663	101.37	108.7	98.1025	110.75	96.5418	93.7012	62.1789	71.4495	64.9538	76.4196	87.5156	75.9883	99.4822	94.1911	92.7656	100.336	108.888	98.5784
ENSG00000129315	O60563	904	CCNT1	Cyclin-T1 OS=Homo sapiens (Human) OX=9606 GN=CCNT1 PE=1 SV=1 source=Uniprot,https://www.uniprot.org/uniprot/O60563	80.6	34.9898	27.3301	38.4308	33.5778	30.9054	27.1567	31.4001	31.2116	29.6283	33.2604	31.6002	26.9224	31.7133	29.1969	27.7211	33.1927	28.0329	29.4873	30.8552	33.6569	34.0209	36.8497	27.9222	26.9347
ENSG00000156970	O60566	701	BUB1B	Mitotic checkpoint serine/threonine-protein kinase BUB1 beta OS=Homo sapiens (Human) OX=9606 GN=BUB1B PE=1 SV=3 source=Uniprot,https://www.uniprot.org/uniprot/O60566	119.5	4.6423	5.97782	11.4137	6.05334	6.00305	4.31892	4.1263	4.96227	7.06932	5.864	6.07236	5.72485	2.70482	1.39058	1.49971	2.91749	0.977774	1.90003	1.94499	0.968026	1.49924	2.53859	1.20801	1.29999
ENSG00000106397	O60568	8985	PLOD3	Multifunctional procollagen lysine hydroxylase and glycosyltransferase LH3 OS=Homo sapiens (Human) OX=9606 GN=PLOD3 PE=1 SV=1 source=Uniprot,https://www.uniprot.org/uniprot/O60568	84.7	43.5365	64.6395	62.874	64.363	72.0174	53.7004	51.8465	62.9246	56.7058	57.8129	53.219	55.1206	44.9937	36.4232	37.1108	37.4738	46.8553	37.6629	37.8258	46.7182	43.6185	29.4787	46.2427	40.9181
ENSG00000135930	O60573	9470	EIF4E2	Eukaryotic translation initiation factor 4E type 2 OS=Homo sapiens (Human) OX=9606 GN=EIF4E2 PE=1 SV=1 source=Uniprot,https://www.uniprot.org/uniprot/O60573	28.3	116.41	122.152	95.9721	108.184	105.612	117.445	116.12	111.21	118.221	110.989	117.778	116.714	126.082	138.306	141.455	124.888	118.601	124.174	130.137	115.083	111.375	120.165	103.536	115.429
ENSG00000082258	O60583	905	CCNT2	Cyclin-T2 OS=Homo sapiens (Human) OX=9606 GN=CCNT2 PE=1 SV=2 source=Uniprot,https://www.uniprot.org/uniprot/O60583	81	12.6109	13.0525	12.9011	15.128	12.0672	11.7972	10.8535	14.0491	11.6746	11.4218	12.4235	11.1937	15.1992	15.1706	12.7595	13.5111	12.7077	8.88772	9.51289	10.7019	10.0456	8.16092	10.9332	9.24558
ENSG00000131504	O60610	1729	DIAPH1	Protein diaphanous homolog 1 OS=Homo sapiens (Human) OX=9606 GN=DIAPH1 PE=1 SV=2 source=Uniprot,https://www.uniprot.org/uniprot/O60610	141.3	129.333	119.141	119.284	108.991	113.079	100.254	138.305	107.323	120.5	144.605	140.245	120.951	96.9884	86.2022	89.8005	100.881	108.025	87.0232	119.398	124.88	117.741	154.957	125.456	117.816
ENSG00000183291	O60613	9403	SELENOF	Selenoprotein F OS=Homo sapiens (Human) OX=9606 GN=SELENOF PE=1 SV=4 source=Uniprot,https://www.uniprot.org/uniprot/O60613	18.1	92.8766	107.056	120.275	39.371	102.243	45.98	81.4218	62.3598	57.7196	68.9769	71.1607	54.5821	58.7922	72.8343	57.9027	42.8023	101.425	57.2394	54.2758	93.9437	85.8864	94.2853	67.8427	54.8066
ENSG00000065609	O60641	9892	SNAP91	Clathrin coat assembly protein AP180 OS=Homo sapiens (Human) OX=9606 GN=SNAP91 PE=1 SV=2 source=Uniprot,https://www.uniprot.org/uniprot/O60641	92.4	151.408	135.513	124.445	169.647	157.815	174.524	160.977	165.349	180.795	151.969	156.23	151.273	466.698	492.94	396.133	544.657	563.46	458.196	486.229	391.304	379.806	322.326	307.268	335.109
ENSG00000180104	O60645	11336	EXOC3	Exocyst complex component 3 OS=Homo sapiens (Human) OX=9606 GN=EXOC3 PE=1 SV=3 source=Uniprot,https://www.uniprot.org/uniprot/O60645	85.5	94.155	95.1427	87.0598	85.5054	90.1976	77.0434	96.8449	90.484	88.6086	99.6208	102.66	91.3716	109.631	105.359	96.1253	101.036	117.319	87.0211	95.4503	108.297	105.096	123.809	112.722	101.582
ENSG00000105355	O60664	10226	PLIN3	Perilipin-3 OS=Homo sapiens (Human) OX=9606 GN=PLIN3 PE=1 SV=3 source=Uniprot,https://www.uniprot.org/uniprot/O60664	47	314.107	439.143	335.704	362.461	413.516	377.716	354.576	377.633	355.804	375.526	342.38	374.425	194.777	196.637	205.161	235.003	252.653	274.402	248.292	315.866	280.419	267.36	309.564	284.742
ENSG00000185238	O60678	10196	PRMT3	Protein arginine N-methyltransferase 3 OS=Homo sapiens (Human) OX=9606 GN=PRMT3 PE=1 SV=4 source=Uniprot,https://www.uniprot.org/uniprot/O60678	59.9	73.7002	89.8409	85.0815	68.0308	86.3176	57.1209	65.6919	57.2478	65.4143	82.2224	66.032	71.238	41.9406	41.6193	49.9252	43.1119	51.76	49.0792	44.7676	50.9955	53.7106	39.7898	46.073	46.2281
ENSG00000025800	O60684	23633	KPNA6	Importin subunit alpha-7 OS=Homo sapiens (Human) OX=9606 GN=KPNA6 PE=1 SV=1 source=Uniprot,https://www.uniprot.org/uniprot/O60684	60	145.345	141.97	119.612	143.886	148.673	141.997	136.992	134.846	149.437	141.27	120.243	145.523	116.076	122.461	146.926	133.739	137.685	132.856	150.891	140.151	124.966	125.36	125.142	136.621
ENSG00000109814	O60701	7358	UGDH	UDP-glucose 6-dehydrogenase OS=Homo sapiens (Human) OX=9606 GN=UGDH PE=1 SV=1 source=Uniprot,https://www.uniprot.org/uniprot/O60701	55	564.99	627.048	565.453	549.64	574.627	502.962	417.295	394.212	421.098	424.527	422.504	431.526	288.568	251.593	291.541	227.145	216.924	226.784	204.346	240.699	251.712	265.384	283.136	279.382
ENSG00000198561	O60716	1500	CTNND1	Catenin delta-1 OS=Homo sapiens (Human) OX=9606 GN=CTNND1 PE=1 SV=1 source=Uniprot,https://www.uniprot.org/uniprot/O60716	108.1	295.764	287.961	317.46	278.137	299.796	237.751	282.267	246.056	255.803	231.09	239.077	245.586	178.394	172.069	182.03	181.623	192.278	174.686	190.607	206.112	214.85	240.264	208.959	211.351
ENSG00000116237	O60725	23463	ICMT			33.3443	33.9144	31.6545	22.6772	29.4957	24.3426	24.9748	19.2509	22.8868	21.1138	22.7335	22.834	16.022	20.1826	18.9123	20.9706	18.6238	16.4942	16.914	17.6053	17.7036	14.0094	15.2977	13.8882
ENSG00000114784	O60739	10289	EIF1B	Eukaryotic translation initiation factor 1b OS=Homo sapiens (Human) OX=9606 GN=EIF1B PE=1 SV=2 source=Uniprot,https://www.uniprot.org/uniprot/O60739	12.8	89.62	101.651	100.483	62.1794	83.1666	44.0668	80.2891	63.7034	68.3627	77.3919	71.859	61.1966	45.1229	58.1905	47.3947	58.6404	74.0977	63.5626	88.8547	116.119	90.187	183.524	115.731	90.6313
ENSG00000205302	O60749	6643	SNX2	Sorting nexin-2 OS=Homo sapiens (Human) OX=9606 GN=SNX2 PE=1 SV=2 source=Uniprot,https://www.uniprot.org/uniprot/O60749	58.4	279.675	304.25	289.904	336.165	320.603	318.333	302.339	319	307.959	286.267	287.111	307.484	247.628	215.13	249.552	251.088	231.684	255.823	230.861	234.918	246.718	225.606	250.54	263.545
ENSG00000000419	O60762	8813	DPM1	Dolichol-phosphate mannosyltransferase subunit 1 OS=Homo sapiens (Human) OX=9606 GN=DPM1 PE=1 SV=1 source=Uniprot,https://www.uniprot.org/uniprot/O60762	29.6	216.45	219.796	215.945	148.029	202.202	122.985	167.688	136.788	130.119	145.337	141.469	127.868	123.286	116.974	102.525	129.041	142.351	104.017	138.697	150.43	134.008	182.621	135.82	118.564
ENSG00000138768	O60763	8615	USO1	General vesicular transport factor p115 OS=Homo sapiens (Human) OX=9606 GN=USO1 PE=1 SV=2 source=Uniprot,https://www.uniprot.org/uniprot/O60763	107.8	209.01	263.607	236.156	253.699	257.17	217.597	244.876	229.73	242.412	225.838	211.692	237.948	258.579	245.777	247.762	276.982	286.084	239.719	336.637	284.544	260.283	267.618	240.76	263.253
ENSG00000120333	O60783	63931	MRPS14	28S ribosomal protein S14, mitochondrial OS=Homo sapiens (Human) OX=9606 GN=MRPS14 PE=1 SV=1 source=Uniprot,https://www.uniprot.org/uniprot/O60783	15.1	43.1083	50.7301	69.7162	78.2374	50.0229	43.7079	52.4896	56.4643	56.8401	67.2816	81.2692	60.3455	81.8368	62.6493	53.2378	98.1742	66.4544	63.4878	76.6438	53.621	66.3579	38.769	79.3131	50.288
ENSG00000100284	O60784	10043	TOM1	Target of Myb protein 1 OS=Homo sapiens (Human) OX=9606 GN=TOM1 PE=1 SV=2 source=Uniprot,https://www.uniprot.org/uniprot/O60784	53.8	45.3957	37.9515	41.8931	37.9274	32.2164	30.3338	39.8801	43.2384	38.1249	38.6567	43.0253	38.7721	37.386	40.422	24.1271	29.6991	26.2638	26.5863	35.3107	32.7876	32.4041	46.1458	42.1279	34.8989
ENSG00000123836	O60825	5208	PFKFB2	6-phosphofructo-2-kinase/fructose-2,6-bisphosphatase 2 OS=Homo sapiens (Human) OX=9606 GN=PFKFB2 PE=1 SV=2 source=Uniprot,https://www.uniprot.org/uniprot/O60825	58.4	27.0424	38.3444	25.5362	29.4798	27.0747	21.2099	27.4388	33.4953	23.0716	27.3105	31.8632	22.0415	50.723	48.8397	39.9801	49.1213	45.7103	39.382	50.8206	43.925	41.8766	42.3457	41.3471	32.97
ENSG00000101997	O60826	28952	CCDC22	Coiled-coil domain-containing protein 22 OS=Homo sapiens (Human) OX=9606 GN=CCDC22 PE=1 SV=1 source=Uniprot,https://www.uniprot.org/uniprot/O60826	70.7	53.7401	73.879	46.9621	59.0235	66.8841	63.5682	55.4053	53.8518	57.6252	62.4448	53.8924	59.7095	49.2712	48.4789	57.0509	50.4829	51.2895	56.2619	55.3662	52.4265	53.0946	50.6887	48.8563	59.7472
ENSG00000102103	O60828	10084	PQBP1	Polyglutamine-binding protein 1 OS=Homo sapiens (Human) OX=9606 GN=PQBP1 PE=1 SV=1 source=Uniprot,https://www.uniprot.org/uniprot/O60828	30.5	435.598	492.984	521.234	604.806	555.38	585.139	450.807	475.828	547.431	502.94	485.877	480.221	559.286	567.648	545.014	617.098	517.969	512.616	534.403	531.2	528.289	371.735	543.708	517.436
ENSG00000126768	O60830	10245	TIMM17B	Mitochondrial import inner membrane translocase subunit Tim17-B OS=Homo sapiens (Human) OX=9606 GN=TIMM17B PE=1 SV=1 source=Uniprot,https://www.uniprot.org/uniprot/O60830	18.3	26.1286	26.1868	35.8271	35.4206	24.8876	27.1777	25.0909	28.4072	33.8306	31.2385	25.4567	26.7402	36.247	35.6228	23.4587	41.6123	34.961	38.135	49.4456	33.7737	45.7423	26.576	35.6893	32.1843
ENSG00000243279	O60831	11230	PRAF2	PRA1 family protein 2 OS=Homo sapiens (Human) OX=9606 GN=PRAF2 PE=1 SV=1 source=Uniprot,https://www.uniprot.org/uniprot/O60831	19.2	180.304	221.784	241.191	126.176	196.124	131.805	164.378	161.806	166.304	167.514	153.668	152.288	173.281	217.838	138.12	151.014	215.462	154.4	285.771	255.684	257.543	287.51	226.382	187.054
ENSG00000130826	O60832	1736	DKC1	H/ACA ribonucleoprotein complex subunit DKC1 OS=Homo sapiens (Human) OX=9606 GN=DKC1 PE=1 SV=3 source=Uniprot,https://www.uniprot.org/uniprot/O60832	57.6	374.881	350.294	391.762	347.222	344.697	296.972	328.021	316.897	285.571	271.901	306.249	272.268	316.962	305.61	252.342	293.223	283.385	246.594	292.345	298.725	293.219	295.14	305.787	278.618
ENSG00000158417	O60841	9669	EIF5B	Eukaryotic translation initiation factor 5B OS=Homo sapiens (Human) OX=9606 GN=EIF5B PE=1 SV=4 source=Uniprot,https://www.uniprot.org/uniprot/O60841	138.7	269.761	294.342	278.724	296.6	244.385	250.56	247.305	252.54	254.939	255.614	236.023	243.744	238.126	224.158	248.047	288.363	251.349	262.708	282.879	251.647	242.895	206.233	209.595	212.526
ENSG00000204977	O60858	10206	TRIM13	E3 ubiquitin-protein ligase TRIM13 OS=Homo sapiens (Human) OX=9606 GN=TRIM13 PE=1 SV=2 source=Uniprot,https://www.uniprot.org/uniprot/O60858	47	35.8153	28.6567	8.90098	36.6461	32.5913	53.0935	35.0729	38.9022	42.6172	34.1878	38.4124	43.5348	42.1387	41.4786	55.3417	46.0892	37.5039	63.5243	44.1512	38.844	33.958	40.3941	41.746	51.3715
ENSG00000007237	O60861	8522	GAS7	Growth arrest-specific protein 7 OS=Homo sapiens (Human) OX=9606 GN=GAS7 PE=1 SV=3 source=Uniprot,https://www.uniprot.org/uniprot/O60861	54.3	10.9831	13.5044	12.3035	12.6741	11.3311	11.7986	9.09185	11.1665	10.0196	10.9297	9.58816	10.179	20.8214	16.6172	16.9363	24.1219	26.0225	23.5266	27.2321	16.4406	17.6401	10.0524	11.8247	12.2409
ENSG00000107223	O60869	8721	EDF1	Endothelial differentiation-related factor 1 OS=Homo sapiens (Human) OX=9606 GN=EDF1 PE=1 SV=1 source=Uniprot,https://www.uniprot.org/uniprot/O60869	16.4	787.492	796.512	747.824	973.076	724.988	1063.11	970.517	845.902	1063.16	1015.47	1037.41	1170.81	824.331	847.448	998.481	734.392	583.484	766.542	675.021	670.511	755.83	661.309	796.202	912.118
ENSG00000151657	O60870	22944	KIN	DNA/RNA-binding protein KIN17 OS=Homo sapiens (Human) OX=9606 GN=KIN PE=1 SV=2 source=Uniprot,https://www.uniprot.org/uniprot/O60870	45.3	114.945	128.982	118.789	118.462	106.853	128.494	111.069	100.786	108.879	109.352	100.545	112.262	104.692	107.873	106.746	105.606	100.593	99.2139	105.496	111.246	97.0351	93.4745	101.132	101.463
ENSG00000147202	O60879	1730	DIAPH2	Protein diaphanous homolog 2 OS=Homo sapiens (Human) OX=9606 GN=DIAPH2 PE=1 SV=1 source=Uniprot,https://www.uniprot.org/uniprot/O60879	125.5	23.4515	24.956	28.3169	22.2414	37.7247	20.3847	23.1033	25.8994	23.8533	19.4005	17.6281	20.4501	10.4282	6.36713	6.18114	11.4715	9.62577	7.02305	12.0552	8.55888	8.44389	13.8392	11.1931	7.71155
ENSG00000069345	O60884	10294	DNAJA2	DnaJ homolog subfamily A member 2 OS=Homo sapiens (Human) OX=9606 GN=DNAJA2 PE=1 SV=1 source=Uniprot,https://www.uniprot.org/uniprot/O60884	45.7	240.39	265.284	320.669	358.727	250.112	300.207	265.527	369.814	294.091	318.309	272.565	289.622	335.075	329	323.703	372.58	260.304	307.763	393.882	262.518	321.201	255.061	277.533	301.026
ENSG00000141867	O60885	23476	BRD4	Bromodomain-containing protein 4 OS=Homo sapiens (Human) OX=9606 GN=BRD4 PE=1 SV=2 source=Uniprot,https://www.uniprot.org/uniprot/O60885	152.1	148.226	110.283	132.549	140.556	135.109	136.421	145.813	142.559	141.476	144.126	137.633	137.313	122.766	122.736	112.604	117.152	110.487	105.197	110.743	122.894	128.086	131.397	127.969	128.026
ENSG00000112514	O60888	51596	CUTA	Protein CutA OS=Homo sapiens (Human) OX=9606 GN=CUTA PE=1 SV=2 source=Uniprot,https://www.uniprot.org/uniprot/O60888	19.1	166.376	177.86	208.22	174.396	168.329	127.496	155.341	143.886	150.151	135.68	125.01	131.295	150.225	178.06	171.745	157.685	185.294	132.85	176.656	172.189	154.023	244.796	184.274	163.591
ENSG00000079482	O60890	4983	OPHN1	Oligophrenin-1 OS=Homo sapiens (Human) OX=9606 GN=OPHN1 PE=1 SV=1 source=Uniprot,https://www.uniprot.org/uniprot/O60890	91.6	15.7322	13.832	17.0775	20.7971	25.5876	19.1636	18.0275	23.2699	19.3949	21.1068	19.1463	18.2459	17.8137	14.7366	16.2957	20.3488	19.4118	15.8783	20.5753	18.046	20.4532	19.1078	18.6678	18.6571
ENSG00000101849	O60907	6907	TBL1X	F-box-like/WD repeat-containing protein TBL1X OS=Homo sapiens (Human) OX=9606 GN=TBL1X PE=1 SV=3 source=Uniprot,https://www.uniprot.org/uniprot/O60907	62.5	36.2228	28.7132	40.0212	37.9521	26.6023	31.8955	36.8318	25.809	37.8535	28.4898	25.1606	32.9407	21.4438	14.3754	20.7577	23.9145	13.8851	18.5007	23.9283	16.9061	23.4198	19.2484	17.458	22.3165
ENSG00000136273	O60921	3364	HUS1	Checkpoint protein HUS1 OS=Homo sapiens (Human) OX=9606 GN=HUS1 PE=1 SV=1 source=Uniprot,https://www.uniprot.org/uniprot/O60921	31.7	62.0689	69.1395	73.158	67.7778	70.5474	56.5008	55.4093	61.8673	53.757	54.1367	51.5568	48.7172	48.7156	49.2507	42.4389	47.6586	54.4416	46.1732	52.3079	55.02	48.0624	50.6669	46.1918	39.6535
ENSG00000113068	O60925	5201	PFDN1	Prefoldin subunit 1 OS=Homo sapiens (Human) OX=9606 GN=PFDN1 PE=1 SV=2 source=Uniprot,https://www.uniprot.org/uniprot/O60925	14.2	409.145	404.273	413.104	491.468	432.114	448.245	431.093	430.161	426.448	457.178	431.949	411.68	500.135	495.7	535.356	562.435	526.674	548.96	612.886	515.934	529.058	485.62	492.042	522.027
ENSG00000171865	O60930	246243	RNASEH1	Ribonuclease H1 OS=Homo sapiens (Human) OX=9606 GN=RNASEH1 PE=1 SV=2 source=Uniprot,https://www.uniprot.org/uniprot/O60930	32	31.0767	19.8849	10.3836	21.3266	20.982	43.6008	29.0642	28.1088	36.7155	33.9584	28.3178	38.2844	17.6689	26.7202	43.6486	27.5521	29.7818	52.1585	39.308	36.7363	30.9493	44.9236	34.6987	45.5952
ENSG00000104320	O60934	4683	NBN	Nibrin OS=Homo sapiens (Human) OX=9606 GN=NBN PE=1 SV=1 source=Uniprot,https://www.uniprot.org/uniprot/O60934	84.9	79.2339	88.5935	78.9978	68.331	76.7583	56.3831	75.4888	61.8037	74.4297	62.5164	59.4809	69.8952	45.6266	46.3755	43.4714	41.6721	48.0409	41.7523	46.3341	51.0858	50.2512	48.1539	45.7862	46.5146
ENSG00000140939	O60936	8996	NOL3	Nucleolar protein 3 OS=Homo sapiens (Human) OX=9606 GN=NOL3 PE=1 SV=2 source=Uniprot,https://www.uniprot.org/uniprot/O60936	22.6	40.1036	23.213	50.921	27.7148	27.0637	41.2788	42.0902	112.547	58.8642	77.1541	85.2058	73.6268	16.8873	42.7692	33.7876	20.7078	24.2932	34.5001	18.8454	30.316	39.647	33.054	62.9543	48.6235
ENSG00000111880	O60942	8732	RNGTT	mRNA-capping enzyme OS=Homo sapiens (Human) OX=9606 GN=RNGTT PE=1 SV=1 source=Uniprot,https://www.uniprot.org/uniprot/O60942	68.5	54.1815	55.4684	55.7147	59.3227	53.0923	56.1764	60.9774	58.4432	58.7158	68.7891	62.4657	59.7683	69.9999	74.0157	63.6788	66.2304	59.4489	59.9176	68.2152	67.9669	62.5105	65.2054	58.8397	65.2071
ENSG00000131269	O75027	22	ABCB7	ATP-binding cassette sub-family B member 7, mitochondrial OS=Homo sapiens (Human) OX=9606 GN=ABCB7 PE=1 SV=2 source=Uniprot,https://www.uniprot.org/uniprot/O75027	82.6	69.6533	63.1605	55.999	69.2236	76.0493	72.3328	73.6067	59.2149	70.1495	71.2291	67.6491	79.7138	57.8626	52.9722	54.1809	64.2937	64.8205	60.4698	63.173	67.4588	55.6875	65.4129	59.6599	59.7455
ENSG00000116852	O75037	23046	KIF21B	Kinesin-like protein KIF21B OS=Homo sapiens (Human) OX=9606 GN=KIF21B PE=1 SV=2 source=Uniprot,https://www.uniprot.org/uniprot/O75037	182.5	45.5567	49.0496	43.6516	68.119	52.6737	64.5596	60.5501	74.4896	68.8824	66.2874	74.9421	63.2596	115.741	134.258	133.091	134.316	111.387	112.921	111.735	104.362	113.05	104.156	114.416	125.483
ENSG00000149527	O75038	9651	PLCH2	1-phosphatidylinositol 4,5-bisphosphate phosphodiesterase eta-2 OS=Homo sapiens (Human) OX=9606 GN=PLCH2 PE=2 SV=3 source=Uniprot,https://www.uniprot.org/uniprot/O75038	154.6	2.39126	2.20594	2.8415	2.04899	2.12055	3.97575	3.18379	3.96114	3.53064	3.20803	4.80274	3.86741	4.87708	5.10038	6.06568	4.00589	2.67364	3.72412	4.84412	2.57824	3.88272	5.65994	3.79555	5.84506
ENSG00000266028	O75044	23380	SRGAP2	SLIT-ROBO Rho GTPase-activating protein 2 OS=Homo sapiens (Human) OX=9606 GN=SRGAP2 PE=1 SV=3 source=Uniprot,https://www.uniprot.org/uniprot/O75044	120.8	93.4471	107.992	102.229	115.73	101.302	122.519	117.381	123.428	128.64	145.75	154.962	142.101	126.899	147.992	145.956	203.729	194.41	159.55	281.749	186.078	184.838	138.282	150.416	149.194
ENSG00000076356	O75051	5362	PLXNA2	Plexin-A2 OS=Homo sapiens (Human) OX=9606 GN=PLXNA2 PE=1 SV=4 source=Uniprot,https://www.uniprot.org/uniprot/O75051	211	24.587	16.7096	21.2837	26.5165	24.7142	22.6016	24.7442	24.6865	27.9334	24.8212	22.0485	23.709	25.3179	21.5008	22.9051	29.7065	35.3693	29.9141	37.4491	55.5447	50.9061	63.5836	56.5516	54.673
ENSG00000198929	O75052	9722	NOS1AP	Carboxyl-terminal PDZ ligand of neuronal nitric oxide synthase protein OS=Homo sapiens (Human) OX=9606 GN=NOS1AP PE=1 SV=3 source=Uniprot,https://www.uniprot.org/uniprot/O75052	56.1	16.4721	18.8912	16.0034	18.8119	18.1177	12.8941	14.9853	16.0926	15.742	13.336	10.1932	14.8806	4.02269	4.4587	4.72444	3.79952	3.9554	4.76013	4.6281	5.17413	5.71296	5.03544	5.72399	6.01551
ENSG00000143061	O75054	3321	IGSF3	Immunoglobulin superfamily member 3 OS=Homo sapiens (Human) OX=9606 GN=IGSF3 PE=2 SV=3 source=Uniprot,https://www.uniprot.org/uniprot/O75054	135.1	47.051	49.4392	42.6773	54.5698	52.4355	45.7336	51.4098	52.7763	50.6527	53.5514	47.0121	46.1405	59.1848	54.8228	57.1234	73.5263	103.452	72.361	78.5224	100.946	96.4592	136.413	103.235	111.546
ENSG00000116675	O75061	9829	DNAJC6	Putative tyrosine-protein phosphatase auxilin OS=Homo sapiens (Human) OX=9606 GN=DNAJC6 PE=1 SV=3 source=Uniprot,https://www.uniprot.org/uniprot/O75061	99.9	53.7824	40.6501	45.5023	48.728	41.5153	43.2936	48.9234	62.6301	46.6567	44.4095	49.6794	39.5881	112.85	114.035	98.4409	92.0532	91.1181	86.4857	104.727	84.9906	95.6506	99.9652	83.5944	83.9145
ENSG00000116199	O75063	9917	FAM20B	Glycosaminoglycan xylosylkinase OS=Homo sapiens (Human) OX=9606 GN=FAM20B PE=1 SV=1 source=Uniprot,https://www.uniprot.org/uniprot/O75063	46.4	47.0823	47.257	57.7606	51.3262	43.491	48.8042	44.1438	43.0788	53.0926	39.9418	44.4906	47.9008	51.8006	53.9476	59.7425	72.2105	59.4407	58.7994	70.8098	52.587	69.4746	56.3384	48.5967	53.1404
ENSG00000071127	O75083	9948	WDR1	WD repeat-containing protein 1 OS=Homo sapiens (Human) OX=9606 GN=WDR1 PE=1 SV=4 source=Uniprot,https://www.uniprot.org/uniprot/O75083	66.2	303.528	359.451	295.943	339.823	342.994	353.111	395.26	356.387	373.847	406.226	394.108	417.758	272.825	292.336	300.598	293.577	303.582	299.038	330.9	338.534	320.325	391.092	380.576	406.82
ENSG00000054793	O75110	10079	ATP9A	Probable phospholipid-transporting ATPase IIA OS=Homo sapiens (Human) OX=9606 GN=ATP9A PE=1 SV=3 source=Uniprot,https://www.uniprot.org/uniprot/O75110	118.5	56.7931	51.7368	46.3106	49.1152	47.5532	42.0191	55.8627	52.6699	50.5653	60.6823	54.6356	50.0383	84.8049	96.3641	91.1251	73.1561	74.5173	62.857	85.2681	80.8766	79.4284	105.346	80.6391	83.2835
ENSG00000102921	O75113	9683	N4BP1	NEDD4-binding protein 1 OS=Homo sapiens (Human) OX=9606 GN=N4BP1 PE=1 SV=4 source=Uniprot,https://www.uniprot.org/uniprot/O75113	100.3	37.9079	37.3306	45.1294	27.749	33.3	25.6949	30.6298	31.59	28.9568	29.6602	32.5406	27.6651	30.0252	33.2384	30.7746	28.0101	30.1244	26.7305	28.6963	32.9158	35.3786	35.5865	34.3191	28.13
ENSG00000134318	O75116	9475	ROCK2	Rho-associated protein kinase 2 OS=Homo sapiens (Human) OX=9606 GN=ROCK2 PE=1 SV=4 source=Uniprot,https://www.uniprot.org/uniprot/O75116	160.8	162.423	149.928	154.691	194.233	192.907	184.179	143.653	154.026	140.597	145.571	132.029	138.942	118.533	98.6048	126.925	137.508	136.488	128.546	127.393	126.603	119.269	132.722	125.201	130.352
ENSG00000163539	O75122	23122	CLASP2	CLIP-associating protein 2 OS=Homo sapiens (Human) OX=9606 GN=CLASP2 PE=1 SV=3 source=Uniprot,https://www.uniprot.org/uniprot/O75122	141	111.706	113.342	109.725	127.325	126.938	120.18	138.573	144.197	136.775	169.902	160.12	160.695	203.568	218.503	217.669	197.19	213.724	174.742	199.279	183.844	184.484	232.364	203.773	223.503
ENSG00000106246	O75127	26024	PTCD1	Pentatricopeptide repeat-containing protein 1, mitochondrial OS=Homo sapiens (Human) OX=9606 GN=PTCD1 PE=1 SV=2 source=Uniprot,https://www.uniprot.org/uniprot/O75127	78.8	6.84345	8.71193	9.56464	7.57926	7.53793	6.54477	7.12212	5.96818	7.13023	6.72524	7.29215	6.40512	7.79893	7.64384	6.247	8.48998	8.92544	6.54158	8.65172	8.63215	9.49696	7.60306	7.09348	7.99
ENSG00000085719	O75131	8895	CPNE3	Copine-3 OS=Homo sapiens (Human) OX=9606 GN=CPNE3 PE=1 SV=1 source=Uniprot,https://www.uniprot.org/uniprot/O75131	60.1	388.06	352.571	385.756	708.8	671.259	608.406	437.852	473.976	459.834	383.968	381.067	389.678	265.114	191.041	284.775	418.117	342.518	338.617	299.663	370.484	355.872	352.815	367.668	359.42
ENSG00000100426	O75132	9889	ZBED4	Zinc finger BED domain-containing protein 4 OS=Homo sapiens (Human) OX=9606 GN=ZBED4 PE=1 SV=2 source=Uniprot,https://www.uniprot.org/uniprot/O75132	130.2	3.9308	4.33637	5.37697	4.26147	3.82238	3.319	3.91295	3.83687	4.12557	3.93414	4.14424	3.90187	4.22701	3.56389	3.18424	4.72315	3.11569	3.16521	3.30311	3.72778	3.8633	3.20271	3.30764	3.77624
ENSG00000100150	O75140	9681	DEPDC5	GATOR complex protein DEPDC5 OS=Homo sapiens (Human) OX=9606 GN=DEPDC5 PE=1 SV=2 source=Uniprot,https://www.uniprot.org/uniprot/O75140	181.1	6.65399	6.70264	6.94861	5.25557	7.0607	5.27365	6.26432	5.66506	6.06554	6.76257	5.94909	6.40594	5.17012	5.76124	11.3834	5.29519	7.37147	6.51066	6.19256	7.32691	7.45209	6.92445	6.16575	5.84202
ENSG00000177380	O75145	8541	PPFIA3	Liprin-alpha-3 OS=Homo sapiens (Human) OX=9606 GN=PPFIA3 PE=1 SV=3 source=Uniprot,https://www.uniprot.org/uniprot/O75145	133.4	29.7048	37.1572	35.7516	37.3901	35.4135	38.3737	32.3449	39.2604	39.289	36.6255	31.5678	34.1817	86.8196	90.211	80.1346	81.5579	84.0545	66.7634	81.1763	75.5232	72.954	60.5086	65.278	68.6612
ENSG00000130787	O75146	9026	HIP1R	Huntingtin-interacting protein 1-related protein OS=Homo sapiens (Human) OX=9606 GN=HIP1R PE=1 SV=2 source=Uniprot,https://www.uniprot.org/uniprot/O75146	119.3	85.3967	95.9083	89.3168	100.49	102.888	89.3203	94.0091	102.777	97.5691	111.673	108.093	103.388	107.658	116.574	115.524	120.494	129.288	109.19	123.543	136.511	136.751	150.537	131.841	142.743
ENSG00000124006	O75147	23363	OBSL1	Obscurin-like protein 1 OS=Homo sapiens (Human) OX=9606 GN=OBSL1 PE=1 SV=4 source=Uniprot,https://www.uniprot.org/uniprot/O75147	206.8	4.70859	4.83804	4.42401	3.35074	2.2837	2.65608	2.82645	2.76245	2.51497	1.99445	2.44077	2.40304	1.29991	1.43212	1.37779	0.756172	0.92215	0.743124	0.907716	1.13806	0.941937	1.05993	1.74031	1.08778
ENSG00000103549	O75150	9810	RNF40	E3 ubiquitin-protein ligase BRE1B OS=Homo sapiens (Human) OX=9606 GN=RNF40 PE=1 SV=5 source=Uniprot,https://www.uniprot.org/uniprot/O75150	113.6	111.497	136.763	111.323	125.805	124.716	117.554	115.663	110.65	111.257	121.346	109.123	110.544	113.911	111.913	109.828	112.907	115.441	99.5338	123.654	130.547	113.663	110.543	103.628	111.339
ENSG00000197724	O75151	5253	PHF2	Lysine-specific demethylase PHF2 OS=Homo sapiens (Human) OX=9606 GN=PHF2 PE=1 SV=4 source=Uniprot,https://www.uniprot.org/uniprot/O75151	120.7	139.186	115.693	123.198	123.458	138.947	144.522	143.849	144.489	141.917	158.584	162.748	143.355	145.852	163.335	140.992	129.425	141.268	150.775	134.16	138.406	148.831	146.726	155.886	157.432
ENSG00000058673	O75152	9877	ZC3H11A	Zinc finger CCCH domain-containing protein 11A OS=Homo sapiens (Human) OX=9606 GN=ZC3H11A PE=1 SV=3 source=Uniprot,https://www.uniprot.org/uniprot/O75152	89.1	225.505	163.893	172.188	183.693	177.857	186.231	180.616	162.986	159.791	150.367	159.722	151.389	151.837	159.776	170.386	147.943	139.528	133.968	154.328	158.099	149.479	189.97	170.153	169.228
ENSG00000132361	O75153	23277	CLUH	Clustered mitochondria protein homolog OS=Homo sapiens (Human) OX=9606 GN=CLUH PE=1 SV=2 source=Uniprot,https://www.uniprot.org/uniprot/O75153	146.6	36.063	45.746	39.5316	30.4998	35.9082	37.1955	30.5761	34.0152	35.3725	29.4271	29.7073	35.7283	36.3491	33.1577	39.7524	35.5863	45.8646	42.6471	37.2235	42.152	40.4614	33.0237	32.5808	32.8131
ENSG00000144712	O75155	23066	CAND2	Cullin-associated NEDD8-dissociated protein 2 OS=Homo sapiens (Human) OX=9606 GN=CAND2 PE=1 SV=3 source=Uniprot,https://www.uniprot.org/uniprot/O75155	135.2	24.1444	36.2842	35.8203	24.1456	33.8258	19.9556	20.1498	21.7953	20.8389	20.4985	18.255	17.6258	20.9998	20.2027	16.2625	19.375	24.2651	17.7045	17.2321	17.9131	16.7086	12.6373	14.3602	12.4576
ENSG00000066135	O75164	9682	KDM4A	Lysine-specific demethylase 4A OS=Homo sapiens (Human) OX=9606 GN=KDM4A PE=1 SV=2 source=Uniprot,https://www.uniprot.org/uniprot/O75164	120.6	51.7677	73.3556	57.1078	62.1147	61.279	53.6164	62.8035	85.1273	67.9655	72.0011	67.028	67.7055	61.7126	70.4997	56.5107	63.87	56.8459	50.9603	63.8007	92.6345	83.7338	69.7432	74.1495	85.9776
ENSG00000138246	O75165	23317	DNAJC13	DnaJ homolog subfamily C member 13 OS=Homo sapiens (Human) OX=9606 GN=DNAJC13 PE=1 SV=5 source=Uniprot,https://www.uniprot.org/uniprot/O75165	254.3	45.1738	44.4087	44.3693	40.0652	45.4264	38.8504	44.7908	42.08	40.8532	47.5936	43.9835	43.169	36.3147	36.3483	38.4314	40.4821	43.1598	36.769	42.0694	43.796	42.8993	56.3373	44.4242	43.0292
ENSG00000100239	O75170	9701	PPP6R2	Serine/threonine-protein phosphatase 6 regulatory subunit 2 OS=Homo sapiens (Human) OX=9606 GN=PPP6R2 PE=1 SV=2 source=Uniprot,https://www.uniprot.org/uniprot/O75170	104.9	34.9032	40.6821	39.5942	36.2186	37.4256	26.6135	31.7699	32.5386	28.9156	33.7656	32.6156	30.6084	35.7366	33.2651	30.9157	38.8438	44.8821	29.2741	36.589	40.7259	35.8683	42.6508	34.4868	34.258
ENSG00000088038	O75175	4849	CNOT3	CCR4-NOT transcription complex subunit 3 OS=Homo sapiens (Human) OX=9606 GN=CNOT3 PE=1 SV=1 source=Uniprot,https://www.uniprot.org/uniprot/O75175	81.8	178.794	165.896	186.736	201.93	164.63	177.988	184.121	188.82	187.018	182.357	190.905	180.23	205.46	205.054	204.267	210.445	178.937	176.881	221.335	181.888	201.164	222.902	216.623	220.187
ENSG00000184402	O75177	26039	SS18L1	Calcium-responsive transactivator OS=Homo sapiens (Human) OX=9606 GN=SS18L1 PE=1 SV=2 source=Uniprot,https://www.uniprot.org/uniprot/O75177	43	190.182	162.025	158.057	195.333	172.241	221.874	194.801	203.018	204.621	221.94	238.153	212.412	337.913	400.997	391.394	316.887	303.912	289.931	318.141	312.35	311.9	344.765	280.138	298.424
ENSG00000132466	O75179	26057	ANKRD17	Ankyrin repeat domain-containing protein 17 OS=Homo sapiens (Human) OX=9606 GN=ANKRD17 PE=1 SV=3 source=Uniprot,https://www.uniprot.org/uniprot/O75179	274.1	52.9788	65.0552	60.259	51.9203	56.198	50.5007	55.8302	55.5492	60.1669	59.2931	54.6584	57.5348	62.2868	64.9265	57.939	61.5979	65.9448	55.9146	66.1382	65.4847	66.4119	61.9123	57.0346	57.9342
ENSG00000127511	O75182	23309	SIN3B	Paired amphipathic helix protein Sin3b OS=Homo sapiens (Human) OX=9606 GN=SIN3B PE=1 SV=2 source=Uniprot,https://www.uniprot.org/uniprot/O75182	133	42.9695	47.066	46.1	49.1439	50.4097	52.5545	45.2242	50.5693	51.0425	47.9436	49.0223	48.4285	54.5475	56.0641	65.7648	58.4806	57.5764	52.3136	58.1902	63.7726	58.8181	53.1269	59.7535	60.7542
ENSG00000105993	O75190	10049	DNAJB6	DnaJ homolog subfamily B member 6 OS=Homo sapiens (Human) OX=9606 GN=DNAJB6 PE=1 SV=2 source=Uniprot,https://www.uniprot.org/uniprot/O75190	36.1	185.72	146.611	180.356	213.46	158.093	224.206	220.461	231.634	222.52	248.25	264.722	240.616	308.413	332.68	291.518	294.901	257.947	273.35	286.638	235.82	276.484	293.078	297.305	289.783
ENSG00000088682	O75208	57017	COQ9	Ubiquinone biosynthesis protein COQ9, mitochondrial OS=Homo sapiens (Human) OX=9606 GN=COQ9 PE=1 SV=1 source=Uniprot,https://www.uniprot.org/uniprot/O75208	35.5	84.8094	88.2422	75.1229	70.4358	92.2245	70.5591	75.4249	68.1078	67.1686	64.047	75.9809	70.1291	61.8341	68.41	58.9007	62.6911	56.5755	68.7273	60.3137	58.472	63.7177	79.7869	61.8627	56.5168
ENSG00000006625	O75223	79017	GGCT	Gamma-glutamylcyclotransferase OS=Homo sapiens (Human) OX=9606 GN=GGCT PE=1 SV=1 source=Uniprot,https://www.uniprot.org/uniprot/O75223	21	456.265	436.837	407.82	479.283	473.773	487.615	400.873	473.875	400.106	386.973	384.17	394.347	325.256	361.517	358.552	334.307	325.309	326.884	346.732	347.776	319.694	342.955	351.834	326.851
ENSG00000115286	O75251	374291	NDUFS7	NADH dehydrogenase [ubiquinone] iron-sulfur protein 7, mitochondrial OS=Homo sapiens (Human) OX=9606 GN=NDUFS7 PE=1 SV=3 source=Uniprot,https://www.uniprot.org/uniprot/O75251	23.5	84.7843	124.234	101.159	141.113	157.582	147.307	96.463	85.0315	120.336	102.464	103.892	124.815	184.193	143.193	195.864	227.128	225.947	206.26	202.688	177.438	156.458	107.87	136.171	155.19
ENSG00000158864	O75306	4720	NDUFS2	NADH dehydrogenase [ubiquinone] iron-sulfur protein 2, mitochondrial OS=Homo sapiens (Human) OX=9606 GN=NDUFS2 PE=1 SV=2 source=Uniprot,https://www.uniprot.org/uniprot/O75306	52.5	177.684	185.187	230.976	200.498	220.997	185.127	172.26	164.753	181.801	171.921	184.154	171.007	212.391	230.822	239.372	294.933	299.291	251.867	278.363	238.159	263.178	249.595	226.501	199.486
ENSG00000109917	O75312	8882	ZPR1	Zinc finger protein ZPR1 OS=Homo sapiens (Human) OX=9606 GN=ZPR1 PE=1 SV=1 source=Uniprot,https://www.uniprot.org/uniprot/O75312	50.9	126.54	136.73	135.329	119.739	132.631	101.895	135.659	125.261	122.42	134.83	133.433	131.557	125.845	102.486	103.25	141.819	141.392	123.209	152.69	156.559	141.204	159.546	127.33	122.201
ENSG00000146729	O75323	2631	NIPSNAP2	Protein NipSnap homolog 2 OS=Homo sapiens (Human) OX=9606 GN=NIPSNAP2 PE=1 SV=1 source=Uniprot,https://www.uniprot.org/uniprot/O75323	33.7	204.086	229.863	230.559	347.136	302.666	307.835	259.812	277.05	284.64	272.374	285.121	299.57	252.195	252.686	256.98	317.322	286.387	282.1	295.632	260.521	249.454	241.614	311.933	268.966
ENSG00000139220	O75334	8499	PPFIA2	Liprin-alpha-2 OS=Homo sapiens (Human) OX=9606 GN=PPFIA2 PE=1 SV=2 source=Uniprot,https://www.uniprot.org/uniprot/O75334	143.2	22.6726	25.803	21.6433	25.7595	22.858	20.4653	25.11	24.2375	23.3095	26.6989	21.9778	20.7729	39.0199	47.5628	43.6896	34.9166	41.8713	29.5155	43.554	42.1756	40.0405	41.3953	38.1109	41.4478
ENSG00000249915	O75340	10016	PDCD6	Programmed cell death protein 6 OS=Homo sapiens (Human) OX=9606 GN=PDCD6 PE=1 SV=1 source=Uniprot,https://www.uniprot.org/uniprot/O75340	21.9	428.733	341.218	275.385	437.084	373.893	469.604	495.079	432.446	442.726	475.377	440.221	478.068	332.566	432.843	491.865	406.126	398.138	452.221	450.816	410.822	403.008	485.381	491.299	500.683
ENSG00000171530	O75347	6902	TBCA	Tubulin-specific chaperone A OS=Homo sapiens (Human) OX=9606 GN=TBCA PE=1 SV=3 source=Uniprot,https://www.uniprot.org/uniprot/O75347	12.8	1414.24	1772.95	1664.16	1578.85	1491.96	1487.92	1636.64	1560.29	1583.03	1639.77	1634.23	1606.72	1546.05	1499.3	1574.71	1748.2	1806.41	1702.11	1823.48	1836.93	1760.47	1994.08	1795.96	1918.93
ENSG00000136888	O75348	9550	ATP6V1G1	V-type proton ATPase subunit G 1 OS=Homo sapiens (Human) OX=9606 GN=ATP6V1G1 PE=1 SV=3 source=Uniprot,https://www.uniprot.org/uniprot/O75348	13.7	292.601	320.85	260.342	279.226	309.649	308.043	285.887	250.119	275.464	292.89	271.328	277.252	282.306	355.349	372.537	316.483	390.315	359.41	274.771	239.272	244.208	219.643	175.284	224.708
ENSG00000119541	O75351	9525	VPS4B	Vacuolar protein sorting-associated protein 4B OS=Homo sapiens (Human) OX=9606 GN=VPS4B PE=1 SV=2 source=Uniprot,https://www.uniprot.org/uniprot/O75351	49.3	125.686	140.927	139.083	124.71	119.35	93.4278	131.906	107.542	109.861	112.446	109.967	104.429	92.4603	85.829	89.7132	93.1403	90.8629	79.5974	80.0479	97.2412	106.147	109.575	94.5972	99.2598
ENSG00000129255	O75352	9526	MPDU1	Mannose-P-dolichol utilization defect 1 protein OS=Homo sapiens (Human) OX=9606 GN=MPDU1 PE=1 SV=2 source=Uniprot,https://www.uniprot.org/uniprot/O75352	26.6	365.51	458.47	447.472	314.432	408.263	370.532	352.822	336.368	358.792	362.216	397.524	404.877	284.499	374.183	370.114	342.359	360.492	386.938	357.16	425.347	444.669	391.626	388.606	429.896
ENSG00000171940	O75362	7764	ZNF217	Zinc finger protein 217 OS=Homo sapiens (Human) OX=9606 GN=ZNF217 PE=1 SV=1 source=Uniprot,https://www.uniprot.org/uniprot/O75362	115.2	4.11041	4.52615	4.65194	5.46036	3.92389	3.61429	3.57861	3.84174	3.61718	4.0936	3.37603	3.2562	2.27126	1.75151	2.15585	1.99336	2.10042	2.41717	2.39578	2.70047	3.05955	3.44736	2.51034	3.12734
ENSG00000113648	O75367	9555	MACROH2A1	Core histone macro-H2A.1 OS=Homo sapiens (Human) OX=9606 GN=H2AFY PE=1 SV=4 source=Uniprot,https://www.uniprot.org/uniprot/O75367	39.6	1755.38	1581.05	1606.34	1735.59	1731.11	2025.71	1740.14	1717.22	1642.3	1661.54	1723.04	1709.24	1899.68	2014.11	1933.18	1873.58	1733.15	1849.59	1955.86	1970.47	1833.36	1958.14	2015.45	2127.33
ENSG00000131171	O75368	6451	SH3BGRL	SH3 domain-binding glutamic acid-rich-like protein OS=Homo sapiens (Human) OX=9606 GN=SH3BGRL PE=1 SV=1 source=Uniprot,https://www.uniprot.org/uniprot/O75368	12.8	1057.05	1051.44	1056.75	897.89	1101.83	849.2	950.506	869.385	823.587	926.948	904.756	837.283	538.225	484.413	488.423	476.804	429.912	412.339	462.094	483.665	446.37	680.862	571.906	536.575
ENSG00000136068	O75369	2317	FLNB	Filamin-B OS=Homo sapiens (Human) OX=9606 GN=FLNB PE=1 SV=2 source=Uniprot,https://www.uniprot.org/uniprot/O75369	278	136.425	194.453	155.707	128.567	117.05	114.671	119.115	115.203	110.003	85.7398	93.7353	97.182	79.0493	62.5211	72.137	77.8025	71.3153	73.8791	69.6956	79.2257	81.1193	74.1962	81.6412	75.0817
ENSG00000237440	O75373	100129842	ZNF737	Zinc finger protein 737 OS=Homo sapiens (Human) OX=9606 GN=ZNF737 PE=2 SV=3 source=Uniprot,https://www.uniprot.org/uniprot/O75373	61.9	5.78574	9.89894	10.0862	9.17653	10.2782	11.2638	8.96926	11.7655	9.52358	8.15402	11.4777	9.57439	10.0421	9.40669	11.3051	9.79576	10.2901	9.38396	8.89002	9.55205	10.9284	8.39878	10.7785	9.73416
ENSG00000141027	O75376	9611	NCOR1	Nuclear receptor corepressor 1 OS=Homo sapiens (Human) OX=9606 GN=NCOR1 PE=1 SV=2 source=Uniprot,https://www.uniprot.org/uniprot/O75376	270	58.6415	57.5502	59.7277	60.7953	66.8738	64.7605	55.0251	60.6811	61.5472	62.6269	63.078	61.8166	48.2385	48.1275	46.958	46.1114	43.8358	43.0788	47.3702	42.5617	43.8788	45.2393	47.4156	47.8105
ENSG00000117533	O75379	8674	VAMP4	Vesicle-associated membrane protein 4 OS=Homo sapiens (Human) OX=9606 GN=VAMP4 PE=1 SV=2 source=Uniprot,https://www.uniprot.org/uniprot/O75379	16.4	47.4648	42.8184	59.5845	103.717	73.5622	93.1616	66.8469	85.729	95.8511	81.6914	80.7205	92.2791	134.361	140.926	139.463	199.305	143.594	143.008	148.762	114.565	117.601	73.5602	115.663	115.535
ENSG00000145494	O75380	4726	NDUFS6	NADH dehydrogenase [ubiquinone] iron-sulfur protein 6, mitochondrial OS=Homo sapiens (Human) OX=9606 GN=NDUFS6 PE=1 SV=1 source=Uniprot,https://www.uniprot.org/uniprot/O75380	13.7	324.077	292.33	313.647	411.954	406.828	286.106	323.364	266.458	317.385	301.264	300.381	287.815	488.86	408.631	354.985	622.561	578.645	472.069	560.818	393.909	450.886	362.633	351.865	329.879
ENSG00000142655	O75381	5195	PEX14	Peroxisomal membrane protein PEX14 OS=Homo sapiens (Human) OX=9606 GN=PEX14 PE=1 SV=1 source=Uniprot,https://www.uniprot.org/uniprot/O75381	41.2	148.469	170.865	158.425	138.084	139.707	120.711	129.619	129.795	124.266	118.777	132.908	117.538	132.96	135.265	134.405	145.62	134.817	127.289	137.241	150.061	137.668	132.779	125.446	117.732
ENSG00000110171	O75382	10612	TRIM3	Tripartite motif-containing protein 3 OS=Homo sapiens (Human) OX=9606 GN=TRIM3 PE=1 SV=2 source=Uniprot,https://www.uniprot.org/uniprot/O75382	80.8	68.4259	56.3058	62.7238	72.9785	66.8138	69.4077	76.3164	84.6264	75.3231	84.6392	78.7908	73.9109	110.628	108.84	101.406	104.15	118.044	116.086	132.014	139.119	137.504	166.369	139.442	147.464
ENSG00000062485	O75390	1431	CS	Citrate synthase, mitochondrial OS=Homo sapiens (Human) OX=9606 GN=CS PE=1 SV=2 source=Uniprot,https://www.uniprot.org/uniprot/O75390	51.7	651.629	710.983	767.642	872.318	821.197	758.763	688.716	624.386	740.18	682.817	712.392	731.253	884.313	797.216	834.024	1209.49	1062.82	1018.8	1267.23	1057.25	1049.11	982.999	923.355	951.758
ENSG00000091640	O75391	9552	SPAG7	Sperm-associated antigen 7 OS=Homo sapiens (Human) OX=9606 GN=SPAG7 PE=1 SV=2 source=Uniprot,https://www.uniprot.org/uniprot/O75391	26	373.78	404.525	386.429	371.222	374.076	379.934	364.466	349.881	342.526	382.792	370.907	349.74	296.212	306.119	306.747	293.139	269.232	267.291	312.589	307.765	284.073	303.371	277.755	286.703
ENSG00000243147	O75394	9553	MRPL33	39S ribosomal protein L33, mitochondrial OS=Homo sapiens (Human) OX=9606 GN=MRPL33 PE=1 SV=1 source=Uniprot,https://www.uniprot.org/uniprot/O75394	7.6	114.698	114.015	123.274	134.281	128.579	126.974	107.135	99.0045	125.092	121.908	111.633	117.318	122.477	113.46	114.128	159.865	148.573	145.702	139.187	125.17	119.379	118.629	105.61	98.9063
ENSG00000265808	O75396	9554	SEC22B	Vesicle-trafficking protein SEC22b OS=Homo sapiens (Human) OX=9606 GN=SEC22B PE=1 SV=4 source=Uniprot,https://www.uniprot.org/uniprot/O75396	24.6	580.835	517.996	589.46	284.023	513.236	285.361	468.634	356.905	310.723	341.807	349.883	298.427	345.566	315.478	264.232	299.127	447.984	290.242	354.032	449.776	432.975	645.019	393.166	313.653
ENSG00000177030	O75398	10522	DEAF1	Deformed epidermal autoregulatory factor 1 homolog OS=Homo sapiens (Human) OX=9606 GN=DEAF1 PE=1 SV=1 source=Uniprot,https://www.uniprot.org/uniprot/O75398	59.3	6.41615	5.94852	6.03433	4.35631	6.2233	3.27519	5.70608	5.04256	4.99624	6.26111	5.11865	4.61774	4.30309	4.01018	2.56743	3.31401	5.59546	3.25264	4.39432	6.72204	4.18414	6.01897	4.08786	3.74099
ENSG00000196504	O75400	55660	PRPF40A	Pre-mRNA-processing factor 40 homolog A OS=Homo sapiens (Human) OX=9606 GN=PRPF40A PE=1 SV=2 source=Uniprot,https://www.uniprot.org/uniprot/O75400	108.7	361.21	351.389	353.226	367.662	353.389	371.989	329.51	333.276	329.153	316.909	326.383	315.308	370.496	367.664	366.002	358.063	339.157	313.562	332.106	350.069	340.954	333.363	348.609	348.222
ENSG00000147526	O75410	6867	TACC1	Transforming acidic coiled-coil-containing protein 1 OS=Homo sapiens (Human) OX=9606 GN=TACC1 PE=1 SV=2 source=Uniprot,https://www.uniprot.org/uniprot/O75410	87.7	6.74596	5.84953	6.60884	5.82123	6.26459	6.51552	7.48614	5.89785	5.6626	7.86178	7.65916	6.85351	5.7222	5.96675	5.59985	5.109	6.28914	7.04916	6.1833	5.66429	6.26521	5.50312	5.54241	4.05161
ENSG00000172113	O75414	10201	NME6	Nucleoside diphosphate kinase 6 OS=Homo sapiens (Human) OX=9606 GN=NME6 PE=1 SV=3 source=Uniprot,https://www.uniprot.org/uniprot/O75414	21.1	7.99188	9.40009	10.1174	6.88473	9.33945	7.13168	7.44319	5.71245	10.8241	6.73097	6.87598	9.09395	6.18309	6.76355	6.05899	6.68008	5.94109	5.2044	5.51257	6.50695	7.06585	6.0688	5.90973	6.79795
ENSG00000146830	O75420	64599	GIGYF1	GRB10-interacting GYF protein 1 OS=Homo sapiens (Human) OX=9606 GN=GIGYF1 PE=1 SV=2 source=Uniprot,https://www.uniprot.org/uniprot/O75420	114.5	7.11502	6.2844	6.48047	6.57564	6.41343	6.51645	7.13542	8.00028	8.22351	8.2428	6.99557	7.98284	6.78562	7.42583	6.44507	5.89621	6.03031	6.39524	6.20732	6.56234	8.25044	6.91007	8.06595	6.44465
ENSG00000128654	O75431	10651	MTX2	Metaxin-2 OS=Homo sapiens (Human) OX=9606 GN=MTX2 PE=1 SV=1 source=Uniprot,https://www.uniprot.org/uniprot/O75431	29.7	216.633	277.687	300.138	373.716	297.845	361.289	248.11	300.406	344.444	261.169	359.902	344.378	415.134	462.488	437.496	578.05	393.232	461.189	443.523	369.5	391.289	264.426	448.17	433.859
ENSG00000122958	O75436	9559	VPS26A	Vacuolar protein sorting-associated protein 26A OS=Homo sapiens (Human) OX=9606 GN=VPS26A PE=1 SV=2 source=Uniprot,https://www.uniprot.org/uniprot/O75436	38.1	265.781	282.455	277.135	223.545	275.688	197.517	263.787	209.369	231.64	253.022	223.332	215.541	171.801	158.204	159.622	193.644	224.437	212.233	218.516	229.798	227.999	272.058	215.768	199.931
ENSG00000183648	O75438	4707	NDUFB1	NADH dehydrogenase [ubiquinone] 1 beta subcomplex subunit 1 OS=Homo sapiens (Human) OX=9606 GN=NDUFB1 PE=1 SV=1 source=Uniprot,https://www.uniprot.org/uniprot/O75438	7	281.968	414.642	360.049	471.966	512.401	292.446	295.835	303.705	317.99	279.145	314.29	265.403	486.521	447.439	362.219	753.083	704.175	542.618	595.005	492.048	616.791	328.219	379.045	330.435
ENSG00000105819	O75439	9512	PMPCB	Mitochondrial-processing peptidase subunit beta OS=Homo sapiens (Human) OX=9606 GN=PMPCB PE=1 SV=2 source=Uniprot,https://www.uniprot.org/uniprot/O75439	54.3	140.537	150.277	161.657	177.426	156.562	136.992	145.528	129.173	153.547	152.712	149.111	143.77	155.869	154.966	131.81	177.567	177.604	158.293	181.778	142.634	158.215	125.527	143.537	127.816
ENSG00000164105	O75446	8819	SAP30	Histone deacetylase complex subunit SAP30 OS=Homo sapiens (Human) OX=9606 GN=SAP30 PE=1 SV=1 source=Uniprot,https://www.uniprot.org/uniprot/O75446	23.3	104.25	132.087	135.201	128.762	161.66	144.006	118.422	136.847	142.493	126.697	146.383	154.232	111.685	99.3007	123.866	98.3479	85.2246	99.0905	82.4865	98.1737	100.903	77.4689	96.7774	118.705
ENSG00000008838	O75448	9862	MED24	Mediator of RNA polymerase II transcription subunit 24 OS=Homo sapiens (Human) OX=9606 GN=MED24 PE=1 SV=1 source=Uniprot,https://www.uniprot.org/uniprot/O75448	110.2	65.0751	61.7509	70.6797	60.6478	62.6224	45.8994	61.86	58.3748	56.7376	58.7479	59.6164	53.891	48.9275	51.374	44.0184	56.2885	57.69	47.1608	57.1626	57.3451	56.3936	64.3233	53.2595	49.6368
ENSG00000083812	O75467	25799	ZNF324	Zinc finger protein 324A OS=Homo sapiens (Human) OX=9606 GN=ZNF324 PE=2 SV=1 source=Uniprot,https://www.uniprot.org/uniprot/O75467	61.1	1.36825	3.52042	2.91224	2.68108	3.0689	5.29076	2.53574	3.41031	4.17135	3.43403	3.92132	5.08316	3.62068	3.3171	6.39704	4.68667	2.98768	4.69553	2.6567	4.094	3.90425	1.86924	3.76442	5.0134
ENSG00000164985	O75475	11168	PSIP1	PC4 and SFRS1-interacting protein OS=Homo sapiens (Human) OX=9606 GN=PSIP1 PE=1 SV=1 source=Uniprot,https://www.uniprot.org/uniprot/O75475	60.1	1391.89	1119.11	1280.22	1458.18	1543.69	1499.73	1467.49	1525.7	1381.81	1359.85	1365.82	1371.89	1100.22	1031.06	1089.19	1045.48	942.482	952.723	1021.15	1072.44	1023.61	1082.84	1150.89	1207.24
ENSG00000107566	O75477	10613	ERLIN1	Erlin-1 OS=Homo sapiens (Human) OX=9606 GN=ERLIN1 PE=1 SV=2 source=Uniprot,https://www.uniprot.org/uniprot/O75477	39.1	221.685	177.982	211.806	221.1	206.339	199.872	238.555	207.086	199.943	185.572	211.318	205.08	134.917	113.295	108.824	131.29	116.7	111.999	119.227	127.673	127.729	137.416	168.61	148.186
ENSG00000196284	O75486	8464	SUPT3H	Transcription initiation protein SPT3 homolog OS=Homo sapiens (Human) OX=9606 GN=SUPT3H PE=1 SV=3 source=Uniprot,https://www.uniprot.org/uniprot/O75486	35.8	17.1438	29.3923	22.0361	21.6452	28.7726	34.3811	18.5266	29.2058	25.8553	22.0843	24.5992	30.2695	20.3409	21.6219	35.0387	27.4619	34.2447	29.7633	40.7828	28.4011	19.7965	20.093	22.3713	29.0952
ENSG00000076716	O75487	2239	GPC4	Glypican-4 OS=Homo sapiens (Human) OX=9606 GN=GPC4 PE=1 SV=4 source=Uniprot,https://www.uniprot.org/uniprot/O75487	62.4	167.295	193.882	212.237	170.293	148.719	134.971	111.062	147.918	128.099	100.546	110.724	108.805	94.6065	97.7287	105.354	75.3944	102.457	102.262	88.7609	80.7595	102.464	87.9617	97.4352	93.4918
ENSG00000213619	O75489	4722	NDUFS3	NADH dehydrogenase [ubiquinone] iron-sulfur protein 3, mitochondrial OS=Homo sapiens (Human) OX=9606 GN=NDUFS3 PE=1 SV=1 source=Uniprot,https://www.uniprot.org/uniprot/O75489	30.2	229.297	242.868	255.038	298.798	294.591	344.157	265.512	271.935	326.887	271.03	300.915	320.837	341.559	384.584	407.689	460.616	475.354	503.801	433.034	375.77	467.584	299.949	368.587	364.723
ENSG00000102805	O75503	1203	CLN5	Ceroid-lipofuscinosis neuronal protein 5 OS=Homo sapiens (Human) OX=9606 GN=CLN5 PE=1 SV=2 source=Uniprot,https://www.uniprot.org/uniprot/O75503	41.5	81.6139	129.735	113.416	100.948	85.3098	101.029	113.139	106.873	114.682	112.481	137.011	128.272	100.571	133.238	119.147	125.114	114.011	103.825	125.992	128.189	128.865	153.808	184.32	146.58
ENSG00000230989	O75506	3281	HSBP1	Heat shock factor-binding protein 1 OS=Homo sapiens (Human) OX=9606 GN=HSBP1 PE=1 SV=1 source=Uniprot,https://www.uniprot.org/uniprot/O75506	8.5	390.675	278.411	428.131	299.076	211.391	212.531	338.016	383.703	327.605	311.381	353.472	291.119	273.64	389.828	210.393	267.177	210.027	230.744	303.169	180.691	267.623	344.328	327.358	247.969
ENSG00000198721	O75521	10455	ECI2	Enoyl-CoA delta isomerase 2, mitochondrial OS=Homo sapiens (Human) OX=9606 GN=ECI2 PE=1 SV=4 source=Uniprot,https://www.uniprot.org/uniprot/O75521	43.6	128.125	128.992	139.47	154.355	162.696	117.776	136.253	138.675	135.725	144.814	149.202	133.568	101.024	76.3197	72.7068	123.096	100.544	89.1015	114.351	101.837	97.4749	115.59	103.738	98.4288
ENSG00000131773	O75525	10656	KHDRBS3	KH domain-containing, RNA-binding, signal transduction-associated protein 3 OS=Homo sapiens (Human) OX=9606 GN=KHDRBS3 PE=1 SV=1 source=Uniprot,https://www.uniprot.org/uniprot/O75525	38.8	190.947	139.963	132.453	188.835	157.89	181.59	203.068	192.85	201.519	214.858	184.212	191.875	467.933	481.683	498.205	427.776	426.262	361.526	493.431	376.913	326.222	436.038	435.643	454.069
ENSG00000171148	O75528	10474	TADA3	Transcriptional adapter 3 OS=Homo sapiens (Human) OX=9606 GN=TADA3 PE=1 SV=1 source=Uniprot,https://www.uniprot.org/uniprot/O75528	48.9	34.0294	42.5349	38.8291	42.9013	40.9323	40.9993	38.5388	38.0048	40.4026	39.5434	36.8894	40.722	44.4286	36.7232	38.4471	47.6798	40.2343	39.6442	45.5508	46.4142	45.5208	35.5072	43.0556	44.2271
ENSG00000135801	O75529	27097	TAF5L	TAF5-like RNA polymerase II p300/CBP-associated factor-associated factor 65 kDa subunit 5L OS=Homo sapiens (Human) OX=9606 GN=TAF5L PE=1 SV=1 source=Uniprot,https://www.uniprot.org/uniprot/O75529	66.1	24.0906	23.4994	23.5705	20.2479	16.8389	15.8872	20.7434	14.8381	20.8174	23.551	15.0682	16.7356	22.0197	17.3381	12.9036	22.0507	20.4761	19.385	27.07	18.7749	28.0087	22.9435	15.7019	19.4754
ENSG00000074266	O75530	8726	EED	Polycomb protein EED OS=Homo sapiens (Human) OX=9606 GN=EED PE=1 SV=2 source=Uniprot,https://www.uniprot.org/uniprot/O75530	50.2	130.837	119.398	155.064	129.506	124.756	128.455	117.855	126.3	125.737	122.35	127.69	115.207	129.258	131.186	112.407	126.031	113.029	125.314	109.838	114.485	120.015	88.2049	110.842	97.2289
ENSG00000175334	O75531	8815	BANF1	Barrier-to-autointegration factor OS=Homo sapiens (Human) OX=9606 GN=BANF1 PE=1 SV=1 source=Uniprot,https://www.uniprot.org/uniprot/O75531	10.1	2103.18	2338.89	2606.61	2312.05	2411.47	2091.17	2683.38	2186.47	2297.15	2360.3	2662.42	2358.56	1842.58	1861.4	1983.87	2150.83	2018	1879.37	2195.18	2640.14	2376.25	2466.53	2536.64	2219.82
ENSG00000115524	O75533	23451	SF3B1	Splicing factor 3B subunit 1 OS=Homo sapiens (Human) OX=9606 GN=SF3B1 PE=1 SV=3 source=Uniprot,https://www.uniprot.org/uniprot/O75533	145.7	598.098	524.196	565.111	623.034	553.407	598.857	542.696	561.799	563.617	544.05	582.599	549.374	554.411	563.545	571.229	549.627	483.865	481.293	489.64	492.66	503.058	494.003	527.164	518.419
ENSG00000009307	O75534	7812	CSDE1	Cold shock domain-containing protein E1 OS=Homo sapiens (Human) OX=9606 GN=CSDE1 PE=1 SV=2 source=Uniprot,https://www.uniprot.org/uniprot/O75534	88.8	210.751	241.335	227.118	232.596	192.348	200.958	213.653	207.07	222.384	231.803	197.034	201.394	268.891	251.611	254.874	294.651	273.928	295.873	365.352	328.038	321.045	269.103	240.35	244.73
ENSG00000102984	O75541	55565	ZNF821	Zinc finger protein 821 OS=Homo sapiens (Human) OX=9606 GN=ZNF821 PE=1 SV=3 source=Uniprot,https://www.uniprot.org/uniprot/O75541	46.8	10.6955	11.2493	10.22	8.0018	10.6086	9.21866	10.2459	13.0639	10.622	11.9829	12.1147	10.9147	14.1759	15.1676	16.1544	12.6077	14.8815	14.6841	15.1746	14.2831	15.0669	17.7602	14.2551	16.4616
ENSG00000120688	O75554	11193	WBP4	WW domain-binding protein 4 OS=Homo sapiens (Human) OX=9606 GN=WBP4 PE=1 SV=1 source=Uniprot,https://www.uniprot.org/uniprot/O75554	42.5	80.5587	97.5305	94.5671	82.5795	96.5882	81.9298	75.9459	78.4711	79.5262	88.4935	70.7122	62.8927	61.4992	55.6844	54.1857	62.0919	61.1464	73.7372	50.2275	60.0465	60.5544	46.1486	47.5139	46.2477
ENSG00000180228	O75569	8575	PRKRA	Interferon-inducible double-stranded RNA-dependent protein kinase activator A OS=Homo sapiens (Human) OX=9606 GN=PRKRA PE=1 SV=1 source=Uniprot,https://www.uniprot.org/uniprot/O75569	34.4	308.844	281.555	275.972	328.475	309.133	354.68	377.898	372.943	389.896	372.484	384.836	398.941	471.332	544.877	506.162	377.645	367.755	400.329	499.149	454.234	458.695	501.229	521.011	534.224
ENSG00000100784	O75582	9252	RPS6KA5	Ribosomal protein S6 kinase alpha-5 OS=Homo sapiens (Human) OX=9606 GN=RPS6KA5 PE=1 SV=1 source=Uniprot,https://www.uniprot.org/uniprot/O75582	89.8	73.0289	66.939	62.4702	79.9948	97.6968	82.6524	87.0707	86.8034	84.9388	85.6079	76.7187	82.1081	93.3573	90.2636	95.7213	109.943	132.124	94.5196	99.164	115.861	95.5482	134.562	101.433	112.013
ENSG00000133997	O75586	10001	MED6	Mediator of RNA polymerase II transcription subunit 6 OS=Homo sapiens (Human) OX=9606 GN=MED6 PE=1 SV=2 source=Uniprot,https://www.uniprot.org/uniprot/O75586	28.4	82.1296	79.1874	65.871	62.9059	73.3331	71.0881	75.0333	62.9614	65.9625	64.0007	63.569	67.1355	59.8734	61.7305	69.4473	53.6579	60.0605	63.4855	61.2325	67.7692	65.5584	66.4664	58.7132	57.8278
ENSG00000005810	O75592	23077	MYCBP2	E3 ubiquitin-protein ligase MYCBP2 OS=Homo sapiens (Human) OX=9606 GN=MYCBP2 PE=1 SV=4 source=Uniprot,https://www.uniprot.org/uniprot/O75592	513.3	12.4148	12.6895	11.9378	10.3039	11.2125	9.11166	13.5314	11.1385	10.9652	14.4123	14.3689	12.0737	11.342	11.303	10.3149	10.3817	10.5207	9.27433	11.7018	11.7968	11.689	15.2412	12.2291	13.5117
ENSG00000100116	O75600	23464	GCAT	2-amino-3-ketobutyrate coenzyme A ligase, mitochondrial OS=Homo sapiens (Human) OX=9606 GN=GCAT PE=1 SV=1 source=Uniprot,https://www.uniprot.org/uniprot/O75600	45.3	14.2702	22.087	18.1455	18.3373	20.5545	15.0128	11.7463	12.5998	14.9143	11.85	16.6855	13.7995	9.82533	14.1613	11.9492	15.8319	14.957	13.2395	11.635	14.5415	13.7943	7.59843	14.4418	11.7081
ENSG00000107833	O75607	10360	NPM3	Nucleoplasmin-3 OS=Homo sapiens (Human) OX=9606 GN=NPM3 PE=1 SV=3 source=Uniprot,https://www.uniprot.org/uniprot/O75607	19.3	132.177	191.21	229.007	114.269	100.209	109.555	122.275	111.758	113.406	109.038	125.111	102.264	99.5472	110.211	74.3508	111.424	100.331	117.121	145.642	135.177	147.246	119.2	123.16	84.9862
ENSG00000120992	O75608	10434	LYPLA1	Acyl-protein thioesterase 1 OS=Homo sapiens (Human) OX=9606 GN=LYPLA1 PE=1 SV=1 source=Uniprot,https://www.uniprot.org/uniprot/O75608	24.7	330.843	338.058	341.473	255.142	302.062	186.887	269.311	207.196	207.774	207.456	195.774	201.714	249.981	250.092	206.297	199.886	235.342	165.103	197.49	224.976	222.969	232.287	191.846	186.793
ENSG00000132591	O75616	26284	ERAL1	GTPase Era, mitochondrial OS=Homo sapiens (Human) OX=9606 GN=ERAL1 PE=1 SV=2 source=Uniprot,https://www.uniprot.org/uniprot/O75616	48.3	14.5285	19.2564	17.9361	19.8182	15.3527	17.5859	17.8796	13.087	14.8567	15.446	17.6602	14.2364	13.9166	11.6851	10.529	14.354	14.4607	11.3963	16.3021	11.7414	11.7119	15.4818	12.625	11.4612
ENSG00000143162	O75629	8804	CREG1	Protein CREG1 OS=Homo sapiens (Human) OX=9606 GN=CREG1 PE=1 SV=1 source=Uniprot,https://www.uniprot.org/uniprot/O75629	24.1	19.1973	23.1904	13.9103	52.1888	26.1031	63.3118	26.7527	58.4072	60.8551	37.8237	65.5603	59.7134	50.8992	72.5728	72.3341	77.9572	25.3651	59.3932	50.067	29.6235	34.0729	20.3432	93.8491	105.317
ENSG00000144028	O75643	23020	SNRNP200	U5 small nuclear ribonucleoprotein 200 kDa helicase OS=Homo sapiens (Human) OX=9606 GN=SNRNP200 PE=1 SV=2 source=Uniprot,https://www.uniprot.org/uniprot/O75643	244.4	422.835	420.798	413.372	427.187	433.318	437.387	395.62	400.948	405.283	399.188	412.363	402.98	382.304	401.352	401.295	372.583	368.503	359.167	373.031	393.86	370.246	372.767	391.473	392.99
ENSG00000143155	O75663	261726	TIPRL	TIP41-like protein OS=Homo sapiens (Human) OX=9606 GN=TIPRL PE=1 SV=2 source=Uniprot,https://www.uniprot.org/uniprot/O75663	31.4	204.08	242.606	196.054	239.388	259.978	224.289	239.84	215.08	226.627	233.66	209.857	227.886	303.231	280.409	294.808	383.803	428.891	344.27	408.023	447.949	359.15	377.367	298.829	338.287
ENSG00000148296	O75683	6838	SURF6	Surfeit locus protein 6 OS=Homo sapiens (Human) OX=9606 GN=SURF6 PE=1 SV=3 source=Uniprot,https://www.uniprot.org/uniprot/O75683	41.4	111.149	117.719	105.848	165.661	106.796	187.234	129.919	201.893	142.826	122.193	153.256	159.529	127.455	137.096	156.789	145.799	81.1429	136.568	141.62	114.864	112.828	99.4744	153.141	150.549
ENSG00000138032	O75688	5495	PPM1B	Protein phosphatase 1B OS=Homo sapiens (Human) OX=9606 GN=PPM1B PE=1 SV=1 source=Uniprot,https://www.uniprot.org/uniprot/O75688	52.6	137.66	196.551	147.323	175.889	158.526	138.368	161.821	137.589	136.58	173.215	139.369	144.792	190.522	187.571	170.91	170.502	152.094	138.437	143.813	131.221	126.883	119.738	121.927	134.198
ENSG00000105963	O75689	11033	ADAP1	Arf-GAP with dual PH domain-containing protein 1 OS=Homo sapiens (Human) OX=9606 GN=ADAP1 PE=1 SV=2 source=Uniprot,https://www.uniprot.org/uniprot/O75689	43.4	26.3485	18.6825	23.2403	21.199	19.7812	24.4379	22.7024	24.6262	25.0826	21.1077	23.0805	25.0256	49.2387	54.55	44.5161	33.3617	41.3338	43.572	47.8066	41.1245	38.6606	61.0473	36.1583	38.8717
ENSG00000120800	O75691	27340	UTP20	Small subunit processome component 20 homolog OS=Homo sapiens (Human) OX=9606 GN=UTP20 PE=1 SV=3 source=Uniprot,https://www.uniprot.org/uniprot/O75691	318.2	30.9069	27.5323	29.6172	28.9831	24.6835	29.4885	25.5694	27.4353	26.6167	26.3849	27.3918	26.7729	21.7651	20.9914	21.4759	28.3383	23.9874	23.838	25.7807	23.483	23.7042	22.834	24.307	22.9505
ENSG00000113569	O75694	9631	NUP155	Nuclear pore complex protein Nup155 OS=Homo sapiens (Human) OX=9606 GN=NUP155 PE=1 SV=1 source=Uniprot,https://www.uniprot.org/uniprot/O75694	155.1	183.487	168.012	181.146	171.667	188.613	174.665	171.398	164.432	163.792	169.865	166.908	155.179	160.603	158.379	146.762	159.625	156.855	148.436	160.314	158.128	157.338	152.772	153.545	149.549
ENSG00000102218	O75695	6102	RP2	Protein XRP2 OS=Homo sapiens (Human) OX=9606 GN=RP2 PE=1 SV=4 source=Uniprot,https://www.uniprot.org/uniprot/O75695	39.6	95.8745	97.8115	86.3371	105.328	102.836	75.4955	112.804	84.0173	79.9034	97.6226	81.5593	81.8245	47.3201	43.5459	43.8749	42.3675	44.1931	36.2207	41.4668	40.1696	42.0929	48.8552	45.5132	48.8711
ENSG00000198554	O75717	11169	WDHD1	WD repeat and HMG-box DNA-binding protein 1 OS=Homo sapiens (Human) OX=9606 GN=WDHD1 PE=1 SV=1 source=Uniprot,https://www.uniprot.org/uniprot/O75717	125.9	78.9753	56.9249	64.4273	65.3344	70.7489	64.6383	59.567	58.4251	63.7408	66.5392	56.4485	60.6966	21.1195	21.197	25.1637	21.7717	22.0885	25.2019	21.7474	23.5962	23.7394	19.4601	19.7789	23.7858
ENSG00000170275	O75718	10491	CRTAP	Cartilage-associated protein OS=Homo sapiens (Human) OX=9606 GN=CRTAP PE=1 SV=1 source=Uniprot,https://www.uniprot.org/uniprot/O75718	46.5	107.235	155.562	122.727	74.2644	95.2261	88.9784	95.6803	93.6454	94.145	76.657	121.371	101.044	43.4978	43.5518	45.9041	35.0871	37.6093	43.5896	41.2339	45.9435	62.7786	66.5159	118.06	73.6995
ENSG00000115840	O75746	8604	SLC25A12	Calcium-binding mitochondrial carrier protein Aralar1 OS=Homo sapiens (Human) OX=9606 GN=SLC25A12 PE=1 SV=2 source=Uniprot,https://www.uniprot.org/uniprot/O75746	74.7	136.426	154.213	138.571	140.312	150.928	120.22	143.737	105.139	140.92	135.217	151.502	144.578	202.054	204.178	182.52	268.794	246.176	225.355	327.48	242.608	245.869	241.009	217.654	212.414
ENSG00000099864	O75781	5064	PALM	Paralemmin-1 OS=Homo sapiens (Human) OX=9606 GN=PALM PE=1 SV=2 source=Uniprot,https://www.uniprot.org/uniprot/O75781	42.1	168.883	194.865	178.219	233.873	197.756	189.999	240.072	235.082	237.812	247.617	253.933	242.204	257.989	255.916	234.742	249.777	227.492	198.551	277.805	265.051	280.158	271.762	304.165	318.894
ENSG00000182220	O75787	10159	ATP6AP2	Renin receptor OS=Homo sapiens (Human) OX=9606 GN=ATP6AP2 PE=1 SV=2 source=Uniprot,https://www.uniprot.org/uniprot/O75787	39	72.093	80.4155	69.5776	102.783	81.5684	111.512	87.87	106.02	104.196	92.3038	100.3	106.07	122.372	138.276	137.572	126.942	99.4901	123.845	108.202	104.105	101.711	78.7707	102.192	114.292
ENSG00000104889	O75792	10535	RNASEH2A	Ribonuclease H2 subunit A OS=Homo sapiens (Human) OX=9606 GN=RNASEH2A PE=1 SV=2 source=Uniprot,https://www.uniprot.org/uniprot/O75792	33.4	336.009	162.619	292.066	246.435	275.428	259.77	278.369	260.554	261.436	313.082	320.133	315.115	150.814	101.691	113.475	146.313	139.149	138.541	152.177	156.777	153.624	195.321	142.563	142.171
ENSG00000151465	O75794	8872	CDC123	Cell division cycle protein 123 homolog OS=Homo sapiens (Human) OX=9606 GN=CDC123 PE=1 SV=1 source=Uniprot,https://www.uniprot.org/uniprot/O75794	39.1	38.407	35.4495	39.6201	37.5887	27.7965	35.3703	32.9435	28.121	29.2696	29.2858	27.7547	29.6739	24.893	19.4992	20.6364	26.5541	23.9479	29.6144	32.9622	26.4446	25.6984	26.2762	21.1194	20.3241
ENSG00000172336	O75817	10248	POP7	Ribonuclease P protein subunit p20 OS=Homo sapiens (Human) OX=9606 GN=POP7 PE=1 SV=2 source=Uniprot,https://www.uniprot.org/uniprot/O75817	15.6	88.5531	20.3049	44.0322	77.0353	44.9481	110.384	71.0504	92.5919	87.7338	72.6965	86.221	107.46	74.7852	97.36	95.0415	72.9586	67.9225	102.358	100.274	87.5008	78.8366	100.435	94.5672	100.8
ENSG00000124787	O75818	10799	RPP40	Ribonuclease P protein subunit p40 OS=Homo sapiens (Human) OX=9606 GN=RPP40 PE=1 SV=3 source=Uniprot,https://www.uniprot.org/uniprot/O75818	41.8	19.118	36.096	45.0587	46.0047	35.0295	41.5029	29.0528	45.5089	42.4354	36.1249	42.6429	40.1439	39.5276	41.943	39.9794	78.6065	34.812	39.5369	38.4507	40.9034	46.5378	19.8529	38.86	36.6005
ENSG00000136870	O75820	7743	ZNF189	Zinc finger protein 189 OS=Homo sapiens (Human) OX=9606 GN=ZNF189 PE=1 SV=2 source=Uniprot,https://www.uniprot.org/uniprot/O75820	72.9	16.6746	24.8888	22.3273	24.9025	27.4032	25.045	23.2025	26.6415	25.4997	23.2754	37.5757	25.5466	23.1092	21.1278	18.9494	22.1307	17.3773	16.7041	19.0714	16.8591	21.4724	14.118	26.3094	17.7704
ENSG00000130811	O75821	8666	EIF3G	Eukaryotic translation initiation factor 3 subunit G OS=Homo sapiens (Human) OX=9606 GN=EIF3G PE=1 SV=2 source=Uniprot,https://www.uniprot.org/uniprot/O75821	35.6	383.618	351.913	378.803	315.792	321.328	309.025	309.689	295.677	319.845	327.581	308.376	312.29	268.033	291.666	274.933	290.731	295.084	299.021	301.549	316.319	292.212	315.613	277.917	252.853
ENSG00000104131	O75822	8669	EIF3J	Eukaryotic translation initiation factor 3 subunit J OS=Homo sapiens (Human) OX=9606 GN=EIF3J PE=1 SV=2 source=Uniprot,https://www.uniprot.org/uniprot/O75822	29	286.777	330.478	265.26	228.074	232.559	189.836	278.003	190.928	215.435	244.609	226.69	214.633	266.649	257.278	266.304	299.018	302.422	259.401	340.221	306.004	275.603	405.714	255.884	256.667
ENSG00000159231	O75828	874	CBR3	Carbonyl reductase [NADPH] 3 OS=Homo sapiens (Human) OX=9606 GN=CBR3 PE=1 SV=3 source=Uniprot,https://www.uniprot.org/uniprot/O75828	30.8	35.505	39.0894	57.2675	23.8173	43.8472	56.1981	64.0187	53.3735	57.8316	107.951	73.5685	72.8881	20.0795	37.2853	41.2426	27.0838	38.8356	46.195	40.1145	49.2909	53.6422	68.3212	57.2087	63.5927
ENSG00000101843	O75832	5716	PSMD10	26S proteasome non-ATPase regulatory subunit 10 OS=Homo sapiens (Human) OX=9606 GN=PSMD10 PE=1 SV=1 source=Uniprot,https://www.uniprot.org/uniprot/O75832	24.4	545.642	851.308	703.172	832.057	789.981	914.881	734.715	857.471	793.169	712.13	829.25	864.404	699.387	728.984	766.006	964.34	747.053	830.238	711.859	750.923	707.026	568.544	672.214	744.341
ENSG00000084073	O75844	10269	ZMPSTE24	CAAX prenyl protease 1 homolog OS=Homo sapiens (Human) OX=9606 GN=ZMPSTE24 PE=1 SV=2 source=Uniprot,https://www.uniprot.org/uniprot/O75844	54.8	110.749	169.875	150.681	163.331	139.656	132.789	136.554	113.525	125.082	126.382	140.856	128.908	146.605	127.443	126.407	182.107	149.493	139.511	156.383	144.322	137.45	117.14	132.237	122.701
ENSG00000109929	O75845	6309	SC5D	Lathosterol oxidase OS=Homo sapiens (Human) OX=9606 GN=SC5D PE=1 SV=2 source=Uniprot,https://www.uniprot.org/uniprot/O75845	35.3	173.998	130.801	142.322	158.697	144.655	132.458	118.501	156.145	132.369	99.5498	107.388	92.0344	204.671	146.942	166.565	253.965	220.351	180.638	238.548	217.738	189.563	141.362	154.592	131.207
ENSG00000104866	O75864	284352	PPP1R37	Protein phosphatase 1 regulatory subunit 37 OS=Homo sapiens (Human) OX=9606 GN=PPP1R37 PE=1 SV=4 source=Uniprot,https://www.uniprot.org/uniprot/O75864	74.7	7.57573	8.27687	8.65119	8.55094	8.13451	7.90808	7.76861	8.12083	9.07495	7.63822	7.73385	8.10962	9.6685	8.8822	7.76159	8.29473	10.4084	6.70983	8.12973	9.47145	9.71024	7.25696	7.50434	5.88543
ENSG00000138413	O75874	3417	IDH1	Isocitrate dehydrogenase [NADP] cytoplasmic OS=Homo sapiens (Human) OX=9606 GN=IDH1 PE=1 SV=2 source=Uniprot,https://www.uniprot.org/uniprot/O75874	46.6	832.626	783.37	751.671	761.174	795.591	701.48	663.375	679.512	646.502	608.174	560.826	557.625	897.713	898.6	938.079	1004.39	1087.69	884.089	963.58	851.179	808.939	766.672	610.284	631.885
ENSG00000059691	O75879	5188	GATB	Glutamyl-tRNA(Gln) amidotransferase subunit B, mitochondrial OS=Homo sapiens (Human) OX=9606 GN=GATB PE=1 SV=1 source=Uniprot,https://www.uniprot.org/uniprot/O75879	61.8	46.2409	53.2008	49.1375	49.5766	57.6882	38.3285	48.8836	42.4244	44.0511	42.2517	38.0897	44.433	43.237	35.8402	35.6695	52.6053	62.686	45.5201	50.2574	58.3903	49.2479	44.717	42.3272	41.9953
ENSG00000133028	O75880	6341	SCO1	Protein SCO1 homolog, mitochondrial OS=Homo sapiens (Human) OX=9606 GN=SCO1 PE=1 SV=1 source=Uniprot,https://www.uniprot.org/uniprot/O75880	33.8	32.6107	38.3425	53.7438	53.4263	46.006	40.5438	39.7018	41.8771	39.9059	43.0618	45.6746	38.0386	43.8067	40.678	36.722	54.2308	45.4089	49.3085	49.4114	44.7751	46.3824	29.5965	45.219	35.1501
ENSG00000088812	O75882	8455	ATRN	Attractin OS=Homo sapiens (Human) OX=9606 GN=ATRN PE=1 SV=2 source=Uniprot,https://www.uniprot.org/uniprot/O75882	158.4	23.5687	25.1912	20.1339	20.2228	20.3663	26.4884	24.6627	20.8647	27.0614	22.5419	24.4863	27.1919	24.9744	26.3763	29.6068	25.2086	23.5252	23.7595	25.9983	27.2803	33.4747	40.0953	25.4526	29.3127
ENSG00000089050	O75884	10741	RBBP9	Serine hydrolase RBBP9 OS=Homo sapiens (Human) OX=9606 GN=RBBP9 PE=1 SV=2 source=Uniprot,https://www.uniprot.org/uniprot/O75884	21	212.254	211.638	208.706	207.577	202.348	152.357	198.858	191.733	172.462	185.3	179.252	182.83	136.539	153.582	125.13	146.956	143.954	121.813	164.604	155.562	156.034	203.65	169.281	167.274
ENSG00000115145	O75886	10254	STAM2	Signal transducing adapter molecule 2 OS=Homo sapiens (Human) OX=9606 GN=STAM2 PE=1 SV=1 source=Uniprot,https://www.uniprot.org/uniprot/O75886	58.1	64.7902	63.8809	66.42	73.8668	66.6993	70.5028	81.4424	71.8158	79.5331	87.8477	83.5998	95.144	76.5711	75.5162	71.1982	82.8247	70.6308	66.6981	76.8884	64.9561	75.3466	82.5318	83.0032	84.9429
ENSG00000090061	O75909	8812	CCNK	Cyclin-K OS=Homo sapiens (Human) OX=9606 GN=CCNK PE=1 SV=2 source=Uniprot,https://www.uniprot.org/uniprot/O75909	64.2	107.297	88.1041	98.0552	66.1095	84.5413	65.1276	75.7998	60.6499	70.2886	85.2374	65.5827	64.1353	62.6977	63.2074	67.5395	71.0957	67.1579	62.0172	66.5922	76.6813	73.5624	89.0544	69.651	61.723
ENSG00000077264	O75914	5063	PAK3	Serine/threonine-protein kinase PAK 3 OS=Homo sapiens (Human) OX=9606 GN=PAK3 PE=1 SV=2 source=Uniprot,https://www.uniprot.org/uniprot/O75914	62.3	128.608	101.417	113.235	131.824	108.069	132.96	161.95	138.581	158.344	234.663	213.846	204.312	233.039	308.527	258.397	214.925	230.21	202.498	221.695	245.644	225.273	256.849	230.505	229.387
ENSG00000144746	O75915	10550	ARL6IP5	PRA1 family protein 3 OS=Homo sapiens (Human) OX=9606 GN=ARL6IP5 PE=1 SV=1 source=Uniprot,https://www.uniprot.org/uniprot/O75915	21.6	469.073	469.895	370.168	365.541	479.08	265.511	315.033	285.774	309.462	208.661	273.092	235.788	430.678	458.671	355.419	492.268	586.842	438.678	501.622	484.818	388.287	469.492	396.571	362.435
ENSG00000033800	O75925	8554	PIAS1	E3 SUMO-protein ligase PIAS1 OS=Homo sapiens (Human) OX=9606 GN=PIAS1 PE=1 SV=2 source=Uniprot,https://www.uniprot.org/uniprot/O75925	71.8	28.5457	28.6984	29.59	26.0803	26.6985	24.7585	26.9494	30.8017	26.8584	29.6407	28.0813	26.0689	24.5734	27.4504	23.5249	22.4021	20.6106	18.2691	21.788	24.7665	24.4778	27.9815	24.2922	24.544
ENSG00000078043	O75928	9063	PIAS2	E3 SUMO-protein ligase PIAS2 OS=Homo sapiens (Human) OX=9606 GN=PIAS2 PE=1 SV=3 source=Uniprot,https://www.uniprot.org/uniprot/O75928	68.2	27.6553	29.2702	33.7975	29.7223	26.4942	25.984	29.1089	32.3686	29.8469	31.707	28.4648	29.3737	28.2015	29.9908	28.2031	31.6389	27.7687	23.1796	28.3437	28.3527	27.8886	29.352	27.1507	28.7988
ENSG00000116752	O75934	10286	BCAS2	Pre-mRNA-splicing factor SPF27 OS=Homo sapiens (Human) OX=9606 GN=BCAS2 PE=1 SV=1 source=Uniprot,https://www.uniprot.org/uniprot/O75934	26.1	280.709	339.295	330.254	390.007	335.209	411.562	294.494	348.296	344.599	298.763	327.215	345.49	360.006	337.752	392.426	370.921	303.632	353.198	324.082	330.338	318.777	245.612	304.896	324.686
ENSG00000137100	O75935	11258	DCTN3	Dynactin subunit 3 OS=Homo sapiens (Human) OX=9606 GN=DCTN3 PE=1 SV=1 source=Uniprot,https://www.uniprot.org/uniprot/O75935	21.1	306.045	280.75	275.935	308.748	296.049	289.896	346.758	292.539	307.042	338.318	309.068	324.667	407.148	391.325	409.417	417.484	412.718	367.248	425.532	369.708	378.669	487.722	388.642	424.961
ENSG00000126698	O75937	22826	DNAJC8	DnaJ homolog subfamily C member 8 OS=Homo sapiens (Human) OX=9606 GN=DNAJC8 PE=1 SV=2 source=Uniprot,https://www.uniprot.org/uniprot/O75937	29.8	479.923	459.57	538.427	604.034	478.236	595.852	573.362	689.288	614.251	597.959	692.665	639.96	499.076	622.102	574.093	653.194	519.628	558.019	616.619	635.324	622.18	637.46	681.438	693.852
ENSG00000119953	O75940	10285	SMNDC1	Survival of motor neuron-related-splicing factor 30 OS=Homo sapiens (Human) OX=9606 GN=SMNDC1 PE=1 SV=1 source=Uniprot,https://www.uniprot.org/uniprot/O75940	26.7	257.358	242.19	319.916	301.233	269.928	276.935	272.827	280.442	280.439	299.866	282.707	263.49	306.411	311.124	269.162	268.905	260.261	261.528	274.241	293.81	290.761	232.218	290.181	291.206
ENSG00000152942	O75943	5884	RAD17	Cell cycle checkpoint protein RAD17 OS=Homo sapiens (Human) OX=9606 GN=RAD17 PE=1 SV=2 source=Uniprot,https://www.uniprot.org/uniprot/O75943	77	31.381	42.796	34.0533	40.6965	47.3842	50.114	38.8342	43.0845	46.1778	41.2956	45.7886	49.9758	38.3441	39.5312	53.7402	47.1886	38.0727	42.6825	38.3186	39.7672	41.1843	31.2104	37.7456	42.9254
ENSG00000167863	O75947	10476	ATP5PD	ATP synthase subunit d, mitochondrial OS=Homo sapiens (Human) OX=9606 GN=ATP5PD PE=1 SV=3 source=Uniprot,https://www.uniprot.org/uniprot/O75947	18.5	377.357	416.049	449.281	461.52	436.84	452.136	372.142	315.431	376.481	350.369	350.863	354.649	521.879	512.318	511.099	721.71	642.974	603.561	681.192	516.77	508.771	504.523	451.754	455.92
ENSG00000137094	O75953	25822	DNAJB5	DnaJ homolog subfamily B member 5 OS=Homo sapiens (Human) OX=9606 GN=DNAJB5 PE=1 SV=1 source=Uniprot,https://www.uniprot.org/uniprot/O75953	39.1	65.6835	71.2386	79.1965	87.1701	95.4466	74.0225	66.181	73.694	72.2596	73.2749	63.0825	59.3286	111.184	84.4431	93.4436	105.264	120.97	92.7246	105.422	128.706	124.28	89.4323	89.4835	90.0033
ENSG00000137312	O75955	10211	FLOT1	Flotillin-1 OS=Homo sapiens (Human) OX=9606 GN=FLOT1 PE=1 SV=3 source=Uniprot,https://www.uniprot.org/uniprot/O75955	47.3	187.987	200.586	175.896	198.721	199.303	238.802	230.88	221.232	212.612	209.187	233.128	235.936	149.456	150.945	154.283	156.8	178.461	162.939	191.941	217.857	198.08	323.04	275.858	290.427
ENSG00000038382	O75962	7204	TRIO	Triple functional domain protein OS=Homo sapiens (Human) OX=9606 GN=TRIO PE=1 SV=2 source=Uniprot,https://www.uniprot.org/uniprot/O75962	346.7	27.9466	28.0815	28.7963	32.8796	27.394	34.6047	35.7346	38.4038	38.8765	43.5802	42.2332	40.0954	69.2136	77.0757	67.4353	68.462	59.6572	52.5904	69.3591	62.3658	69.3122	81.1772	73.2866	76.8561
ENSG00000167283	O75964	10632	ATP5MG	ATP synthase subunit g, mitochondrial OS=Homo sapiens (Human) OX=9606 GN=ATP5MG PE=1 SV=3 source=Uniprot,https://www.uniprot.org/uniprot/O75964	11.4	461.463	521.332	604.643	758.234	645.987	748.842	475.147	455.226	622.709	488.642	523.492	608.581	1048.21	831.461	902.098	1405.99	902.623	1027.72	835.623	692.284	775.978	524.758	653.455	725.089
ENSG00000107186	O75970	8777	MPDZ	Multiple PDZ domain protein OS=Homo sapiens (Human) OX=9606 GN=MPDZ PE=1 SV=2 source=Uniprot,https://www.uniprot.org/uniprot/O75970	221.5	21.8643	26.5643	29.4488	24.6711	26.8548	20.8867	18.3614	16.9705	16.4874	16.7775	15.6512	17.0261	9.88161	8.78565	10.0214	8.95294	10.2145	8.68109	9.77511	10.9712	10.9588	10.4812	10.3054	9.32053
ENSG00000108582	O75976	1362	CPD	Carboxypeptidase D OS=Homo sapiens (Human) OX=9606 GN=CPD PE=1 SV=2 source=Uniprot,https://www.uniprot.org/uniprot/O75976	152.8	31.6432	31.625	38.4769	34.387	24.1828	35.8911	27.7895	27.8942	31.1434	23.3364	24.765	29.1211	37.8974	44.1124	40.9124	41.5267	38.0613	32.5814	25.8903	20.1624	25.6383	18.9292	20.3201	25.3024
ENSG00000108010	O76003	10539	GLRX3	Glutaredoxin-3 OS=Homo sapiens (Human) OX=9606 GN=GLRX3 PE=1 SV=2 source=Uniprot,https://www.uniprot.org/uniprot/O76003	37.4	237.692	246.227	206.629	239.628	203.553	243.756	217.917	202.713	220.714	224.644	216.437	230.754	215.57	184.178	228.189	225.807	197.131	213.835	193.567	175.682	180.639	171.233	174.957	190.731
ENSG00000171360	O76015	8687	KRT38	Keratin, type I cuticular Ha8 OS=Homo sapiens (Human) OX=9606 GN=KRT38 PE=1 SV=3 source=Uniprot,https://www.uniprot.org/uniprot/O76015	50.4	2.32253	1.91396	1.50456	102.647	0.893506	9.79415	4.24024	10.17	30.8997	2.91273	8.87253	6.85696	16.282	15.8744	14.7273	7.44303	0.97387	20.4567	2.12065	1.12738	2.62816	1.26717	3.85424	12.453
ENSG00000171490	O76021	26156	RSL1D1	Ribosomal L1 domain-containing protein 1 OS=Homo sapiens (Human) OX=9606 GN=RSL1D1 PE=1 SV=3 source=Uniprot,https://www.uniprot.org/uniprot/O76021	54.9	565.796	438.651	484.011	475.513	448.223	502.981	459.193	459.444	391.587	363.739	378.706	361.685	333.589	313.784	305.692	374.231	321.281	337.801	458.96	427.803	372.267	407.112	381.04	352.36
ENSG00000109501	O76024	7466	WFS1	Wolframin OS=Homo sapiens (Human) OX=9606 GN=WFS1 PE=1 SV=2 source=Uniprot,https://www.uniprot.org/uniprot/O76024	100.2	26.8779	28.7534	31.2233	19.9801	25.2407	17.5825	25.0461	25.379	22.985	21.747	22.7438	22.7513	17.1191	12.2257	14.2243	14.5937	17.8691	17.9961	16.6288	18.1038	21.0175	19.3806	17.5935	17.6535
ENSG00000166855	O76031	10845	CLPX	ATP-dependent Clp protease ATP-binding subunit clpX-like, mitochondrial OS=Homo sapiens (Human) OX=9606 GN=CLPX PE=1 SV=2 source=Uniprot,https://www.uniprot.org/uniprot/O76031	69.2	107.963	113.617	121.44	107.063	99.5534	92.4635	93.7254	84.1196	94.485	92.9994	90.8563	87.0919	98.8889	85.1728	86.3262	107.26	102.384	99.0171	104.276	98.3682	100.034	80.1825	78.6545	72.0082
ENSG00000079689	O76038	10590	SCGN	Secretagogin OS=Homo sapiens (Human) OX=9606 GN=SCGN PE=2 SV=2 source=Uniprot,https://www.uniprot.org/uniprot/O76038	32	174.627	214.424	195.715	164.14	147.642	266.458	459.6	240.844	320.035	352.103	1105.07	405.433	207.995	233.313	269.494	188.086	199.085	260.96	170.864	220.314	253.095	179.335	223.97	258.803
ENSG00000149809	O76062	7108	TM7SF2	Delta(14)-sterol reductase TM7SF2 OS=Homo sapiens (Human) OX=9606 GN=TM7SF2 PE=1 SV=3 source=Uniprot,https://www.uniprot.org/uniprot/O76062	46.4	119.263	75.1056	109.362	76.0654	72.6163	73.5418	83.1051	85.3418	77.682	62.8004	71.416	60.5517	106.885	117.262	92.2653	89.7903	106.543	96.914	127.125	79.8113	89.0969	85.2985	75.4752	61.4409
ENSG00000173267	O76070	6623	SNCG	Gamma-synuclein OS=Homo sapiens (Human) OX=9606 GN=SNCG PE=1 SV=2 source=Uniprot,https://www.uniprot.org/uniprot/O76070	13.3	313.379	180.995	132.953	156.954	144.779	168.807	95.3796	71.0015	72.8322	79.7154	62.7709	67.551	590.033	127.828	159.615	265.783	77.7101	156.276	93.795	63.4188	74.6512	73.4597	51.9012	67.6153
ENSG00000144021	O76071	9391	CIAO1	Probable cytosolic iron-sulfur protein assembly protein CIAO1 OS=Homo sapiens (Human) OX=9606 GN=CIAO1 PE=1 SV=1 source=Uniprot,https://www.uniprot.org/uniprot/O76071	37.8	72.2285	76.091	99.2742	85.1153	70.8139	108.166	64.8023	94.5214	83.9456	102.053	94.6233	87.7666	65.7993	90.2312	94.1035	106.815	74.5371	89.7739	79.3155	72.2721	76.5168	53.5307	83.1183	72.8851
ENSG00000107372	O76080	7763	ZFAND5	AN1-type zinc finger protein 5 OS=Homo sapiens (Human) OX=9606 GN=ZFAND5 PE=1 SV=1 source=Uniprot,https://www.uniprot.org/uniprot/O76080	23.1	92.9418	89.7163	95.7197	92.4696	93.307	87.191	79.7914	76.4913	87.0039	84.8633	70.0009	78.8295	76.3062	73.9731	75.3525	75.6275	66.9725	63.7213	103.332	91.9192	90.3568	93.1433	58.442	67.7268
ENSG00000174780	O76094	6731	SRP72	Signal recognition particle subunit SRP72 OS=Homo sapiens (Human) OX=9606 GN=SRP72 PE=1 SV=3 source=Uniprot,https://www.uniprot.org/uniprot/O76094	74.6	375.299	367.159	373.422	443.614	396.254	380.913	386.065	387	393.404	416.246	370.307	376.791	364.956	375.213	364.81	397.35	393.294	366.168	420.012	390.067	377.635	374.843	377.934	389.226
ENSG00000204348	O77932	1797	DXO	Decapping and exoribonuclease protein OS=Homo sapiens (Human) OX=9606 GN=DXO PE=2 SV=2 source=Uniprot,https://www.uniprot.org/uniprot/O77932	44.9	25.7703	34.2612	26.9884	27.8246	33.3365	21.9653	26.048	29.589	26.2385	27.6343	26.0629	24.2956	27.9171	29.108	19.3511	26.6271	28.4181	21.3805	25.0693	31.3608	24.4654	24.9463	25.6801	21.3237
ENSG00000153904	O94760	23576	DDAH1	N(G),N(G)-dimethylarginine dimethylaminohydrolase 1 OS=Homo sapiens (Human) OX=9606 GN=DDAH1 PE=1 SV=3 source=Uniprot,https://www.uniprot.org/uniprot/O94760	31.1	265.59	349.876	285.692	417.806	522.118	463.169	478.305	574.443	445.234	456.463	361.091	483.465	282.21	280.763	301.89	247.228	254.185	240.305	299.978	390.187	311.939	403.44	344.506	373.618
ENSG00000108469	O94762	9400	RECQL5	ATP-dependent DNA helicase Q5 OS=Homo sapiens (Human) OX=9606 GN=RECQL5 PE=1 SV=2 source=Uniprot,https://www.uniprot.org/uniprot/O94762	108.8	9.65367	6.43873	7.56384	6.86869	6.36784	5.10081	8.31399	5.74287	6.0583	6.26701	6.51947	6.30475	4.37758	5.61724	4.23995	3.36487	4.09811	3.75602	4.6889	4.58809	4.8341	4.88614	4.90141	4.90257
ENSG00000105176	O94763	8725	URI1	Unconventional prefoldin RPB5 interactor 1 OS=Homo sapiens (Human) OX=9606 GN=URI1 PE=1 SV=3 source=Uniprot,https://www.uniprot.org/uniprot/O94763	59.8	72.2978	28.5259	26.9417	20.08	27.4405	32.3161	35.6517	33.1458	35.8243	24.4859	34.3884	39.9611	24.6512	28.9074	26.4352	23.3171	27.8178	28.6814	25.5712	25.0349	23.8159	47.9887	26.0062	25.1643
ENSG00000149541	O94766	26229	B3GAT3	Galactosylgalactosylxylosylprotein 3-beta-glucuronosyltransferase 3 OS=Homo sapiens (Human) OX=9606 GN=B3GAT3 PE=1 SV=2 source=Uniprot,https://www.uniprot.org/uniprot/O94766	37.1	30.9595	29.9747	49.07	26.9393	28.802	16.639	31.9724	31.114	26.9486	28.604	33.3677	23.0082	34.3651	39.0899	19.2545	32.2408	40.9876	23.1764	49.5196	41.9881	49.381	49.1931	36.7119	25.6111
ENSG00000176956	O94772	4062	LY6H	Lymphocyte antigen 6H OS=Homo sapiens (Human) OX=9606 GN=LY6H PE=1 SV=1 source=Uniprot,https://www.uniprot.org/uniprot/O94772	14.7	133.751	212.053	153.379	105.987	172.059	104.165	149.319	185.453	138.111	173.603	135.769	126.703	212.131	191.429	153.825	122.047	184.125	128.726	172.728	210.519	167.266	163.844	177.213	194.692
ENSG00000149480	O94776	9219	MTA2	Metastasis-associated protein MTA2 OS=Homo sapiens (Human) OX=9606 GN=MTA2 PE=1 SV=1 source=Uniprot,https://www.uniprot.org/uniprot/O94776	75	404.113	303.084	381.362	322.229	340.742	340.171	349.526	328.563	330.663	332.586	332.873	316.596	314.667	245.038	278.153	337.828	410.295	386.175	386.597	381.8	395.651	403.237	304.022	310.697
ENSG00000128918	O94788	8854	ALDH1A2	Retinal dehydrogenase 2 OS=Homo sapiens (Human) OX=9606 GN=ALDH1A2 PE=1 SV=3 source=Uniprot,https://www.uniprot.org/uniprot/O94788	56.7	19.9607	30.5791	34.9017	15.4361	23.8273	8.70279	13.4773	9.45572	9.92665	10.8759	11.0775	8.77932	14.5712	12.0686	9.55362	14.4075	19.717	9.84991	18.9019	18.6763	15.7597	21.5471	15.2874	9.39467
ENSG00000077080	O94805	51412	ACTL6B	Actin-like protein 6B OS=Homo sapiens (Human) OX=9606 GN=ACTL6B PE=1 SV=1 source=Uniprot,https://www.uniprot.org/uniprot/O94805	46.8	116.984	99.383	92.7803	125.931	102.777	125.31	130.546	138.072	146.388	152.705	162.409	142.348	325.446	389.911	356.777	292.393	265.987	275.588	322.456	280.244	307.132	330.317	297.808	339.203
ENSG00000171368	O94811	11076	TPPP	Tubulin polymerization-promoting protein OS=Homo sapiens (Human) OX=9606 GN=TPPP PE=1 SV=1 source=Uniprot,https://www.uniprot.org/uniprot/O94811	23.7	97.3889	104	88.5002	124.01	127.517	112.034	122.316	137.301	125.258	146.074	143.684	110.038	260.852	301.136	229.684	208.169	194.084	203.286	213.999	147.029	168.762	188.708	198.576	176.904
ENSG00000145782	O94817	9140	ATG12	Ubiquitin-like protein ATG12 OS=Homo sapiens (Human) OX=9606 GN=ATG12 PE=1 SV=1 source=Uniprot,https://www.uniprot.org/uniprot/O94817	15.1	177.183	195.187	174.896	143.88	164.768	106.895	165.104	152.092	130.69	149.91	149.29	136.487	118.771	117.999	106.637	123.69	135.653	107.69	127.502	140.612	125.705	164.341	144.604	130.525
ENSG00000101746	O94818	8715	NOL4	Nucleolar protein 4 OS=Homo sapiens (Human) OX=9606 GN=NOL4 PE=1 SV=2 source=Uniprot,https://www.uniprot.org/uniprot/O94818	71.3	50.501	52.7769	68.2515	60.6067	57.8171	47.3445	72.6322	74.0099	70.9588	74.8342	70.941	63.3821	131.339	119.561	91.1944	103.824	119.568	77.3443	98.0052	108.923	117.552	87.8768	90.7707	91.9605
ENSG00000176595	O94819	9920	KBTBD11	Kelch repeat and BTB domain-containing protein 11 OS=Homo sapiens (Human) OX=9606 GN=KBTBD11 PE=1 SV=1 source=Uniprot,https://www.uniprot.org/uniprot/O94819	65.7	145.327	117.781	122.575	147.639	153.194	157.688	154.778	181.496	177.162	150.723	153.329	158.76	208.524	203.177	199.207	222.904	240.207	247.643	244.391	225.355	241.583	224.71	200.435	215.306
ENSG00000198862	O94822	26046	LTN1	E3 ubiquitin-protein ligase listerin OS=Homo sapiens (Human) OX=9606 GN=LTN1 PE=1 SV=6 source=Uniprot,https://www.uniprot.org/uniprot/O94822	200.4	7.37367	5.69536	9.1666	5.86488	5.90109	6.13473	6.68217	9.01811	6.68976	6.79763	10.5784	6.48289	6.57414	12.1755	7.41732	6.21793	7.43118	7.35222	6.61519	5.88594	8.35794	7.26165	8.36772	6.72079
ENSG00000154174	O94826	9868	TOMM70	Mitochondrial import receptor subunit TOM70 OS=Homo sapiens (Human) OX=9606 GN=TOMM70 PE=1 SV=1 source=Uniprot,https://www.uniprot.org/uniprot/O94826	67.4	230.117	241.976	242.363	271.494	259.838	240.193	240.832	230.784	251.676	255.703	266.834	244.735	386.449	366.455	349.346	472.794	428.755	409.446	472.769	418.938	397.556	372.66	411.508	392.407
ENSG00000117408	O94829	9670	IPO13	Importin-13 OS=Homo sapiens (Human) OX=9606 GN=IPO13 PE=1 SV=3 source=Uniprot,https://www.uniprot.org/uniprot/O94829	108.1	29.4883	31.515	27.3449	28.8928	30.525	26.5011	28.5079	28.9011	27.0404	28.8837	25.8513	28.968	28.4147	27.4976	25.2239	27.7803	28.5812	22.2708	25.5582	28.4214	23.4247	27.9403	25.2477	24.9416
ENSG00000085788	O94830	23259	DDHD2	Phospholipase DDHD2 OS=Homo sapiens (Human) OX=9606 GN=DDHD2 PE=1 SV=2 source=Uniprot,https://www.uniprot.org/uniprot/O94830	81	46.1127	28.9208	37.3809	18.3343	25.8862	28.4299	37.9238	34.0744	21.6332	22.3738	24.5915	27.9026	17.3735	14.8965	27.1375	13.2756	86.767	20.737	15.5648	17.3077	21.5018	33.6744	19.0993	22.7618
ENSG00000092203	O94842	9878	TOX4	TOX high mobility group box family member 4 OS=Homo sapiens (Human) OX=9606 GN=TOX4 PE=1 SV=1 source=Uniprot,https://www.uniprot.org/uniprot/O94842	66.2	254.502	197.226	231.759	209.889	212.197	190.992	225.972	200.467	202.378	222.499	221.567	201.942	197.871	197.609	190.756	196.747	189.006	183.786	223.607	224.323	220.15	246.436	197.492	197.919
ENSG00000150961	O94855	9871	SEC24D	Protein transport protein Sec24D OS=Homo sapiens (Human) OX=9606 GN=SEC24D PE=1 SV=2 source=Uniprot,https://www.uniprot.org/uniprot/O94855	112.9	70.0302	87.3313	78.4741	67.5734	82.3735	62.2694	68.7262	72.9506	72.258	63.7838	66.0226	68.4135	52.5613	45.8529	60.3789	74.795	83.5322	70.673	79.5899	68.7465	78.0741	70.7442	78.8637	69.0317
ENSG00000163531	O94856	23114	NFASC	Neurofascin OS=Homo sapiens (Human) OX=9606 GN=NFASC PE=1 SV=4 source=Uniprot,https://www.uniprot.org/uniprot/O94856	149.9	12.1785	17.3357	12.7373	12.6159	13.1776	10.0955	12.2772	14.3934	12.3582	12.7709	11.3319	11.4602	19.3588	21.6147	14.8078	17.6373	23.9138	16.0718	18.0857	23.4059	22.8778	21.6833	19.6213	16.7631
ENSG00000119760	O94864	9913	SUPT7L	STAGA complex 65 subunit gamma OS=Homo sapiens (Human) OX=9606 GN=SUPT7L PE=1 SV=1 source=Uniprot,https://www.uniprot.org/uniprot/O94864	46.2	53.2448	40.2787	44.3764	41.6953	41.9291	41.9076	49.0946	46.5771	48.3287	42.4631	43.9745	50.4697	43.2868	43.0922	36.7171	43.7997	47.2054	44.9197	54.0715	49.0903	50.5539	61.4853	48.7818	48.3131
ENSG00000014123	O94874	23376	UFL1	E3 UFM1-protein ligase 1 OS=Homo sapiens (Human) OX=9606 GN=UFL1 PE=1 SV=2 source=Uniprot,https://www.uniprot.org/uniprot/O94874	89.5	237.855	210.59	229.443	226.754	228.382	207.136	200.71	193.064	180.799	187.308	176.949	176.537	174.495	171.562	162.44	148.084	152.491	141.202	137.177	139.057	132.87	145.057	151.978	138.853
ENSG00000154556	O94875	8470	SORBS2	Sorbin and SH3 domain-containing protein 2 OS=Homo sapiens (Human) OX=9606 GN=SORBS2 PE=1 SV=3 source=Uniprot,https://www.uniprot.org/uniprot/O94875	124	44.4977	34.9634	35.4128	46.4224	41.7141	46.7237	46.3061	49.3618	46.1756	31.669	37.0817	49.6873	70.889	75.5257	72.5399	44.3772	43.5198	45.1382	48.9848	43.3044	51.5712	69.4938	61.2088	65.1267
ENSG00000172765	O94876	23023	TMCC1	Transmembrane and coiled-coil domains protein 1 OS=Homo sapiens (Human) OX=9606 GN=TMCC1 PE=1 SV=3 source=Uniprot,https://www.uniprot.org/uniprot/O94876	72	13.8586	23.1832	29.4392	22.2471	20.895	27.8429	21.7918	32.7145	27.6357	23.0151	36.4954	28.8032	52.2721	49.7381	43.141	46.7612	32.0723	32.2038	26.1865	29.6017	39.8489	21.4891	40.788	38.7355
ENSG00000106443	O94880	9678	PHF14	PHD finger protein 14 OS=Homo sapiens (Human) OX=9606 GN=PHF14 PE=1 SV=2 source=Uniprot,https://www.uniprot.org/uniprot/O94880	100	182.059	162.221	171.364	180.871	168.42	181.646	166.082	168.021	164.61	176.024	196.886	169.417	252.112	249.984	226.64	267.774	254.686	236.227	218.47	231.042	220.192	185.906	211.018	203.487
ENSG00000163960	O94888	26043	UBXN7	UBX domain-containing protein 7 OS=Homo sapiens (Human) OX=9606 GN=UBXN7 PE=1 SV=2 source=Uniprot,https://www.uniprot.org/uniprot/O94888	54.8	385.394	334.824	398.85	331.965	379.81	275.973	358.938	328.32	316.718	341.625	321.811	300.779	340.369	372.393	314.797	321.698	354.061	305.885	365.803	418.284	398.115	455.895	339.532	355.553
ENSG00000164828	O94901	23353	SUN1	SUN domain-containing protein 1 OS=Homo sapiens (Human) OX=9606 GN=SUN1 PE=1 SV=3 source=Uniprot,https://www.uniprot.org/uniprot/O94901	90	143.062	130.061	126.942	107.178	147.104	106.913	121.707	115.425	104.155	98.5769	96.2415	90.0713	115.725	97.9947	97.158	101.428	144.703	101.762	109.993	128.488	126.172	125.61	106.385	96.8907
ENSG00000147471	O94903	11212	PLPBP	Pyridoxal phosphate homeostasis protein OS=Homo sapiens (Human) OX=9606 GN=PLPBP PE=1 SV=1 source=Uniprot,https://www.uniprot.org/uniprot/O94903	30.3	192.373	218.895	227.326	239.67	223.427	254.102	213.177	201.21	246.995	217.077	220.162	248.448	170.975	206.541	200.289	199.555	197.415	221.158	183.538	180.831	188.758	154.976	187.289	178.167
ENSG00000147475	O94905	11160	ERLIN2	Erlin-2 OS=Homo sapiens (Human) OX=9606 GN=ERLIN2 PE=1 SV=1 source=Uniprot,https://www.uniprot.org/uniprot/O94905	37.8	415.984	396.607	292.175	347.97	354.034	374.205	362.528	347.822	331.523	262.859	312.616	335.226	272.086	281.763	276.243	226.09	234.715	239.148	221.032	219.999	212.652	215.777	259.99	253.444
ENSG00000101161	O94906	24148	PRPF6	Pre-mRNA-processing factor 6 OS=Homo sapiens (Human) OX=9606 GN=PRPF6 PE=1 SV=1 source=Uniprot,https://www.uniprot.org/uniprot/O94906	106.9	285.223	267.69	265.172	287.52	273.657	295.701	275.511	265.054	265.366	253.207	277.779	266.418	277.465	274.713	281.78	256.85	245.435	251.909	265.142	269.039	252.79	272.898	274.109	276.762
ENSG00000165494	O94913	51585	PCF11	Pre-mRNA cleavage complex 2 protein Pcf11 OS=Homo sapiens (Human) OX=9606 GN=PCF11 PE=1 SV=3 source=Uniprot,https://www.uniprot.org/uniprot/O94913	172.9	34.1291	35.1805	36.5084	34.5938	37.2145	29.3717	33.3397	29.0068	31.5976	32.7196	29.2758	31.1651	33.2409	30.7153	28.4073	31.3323	33.4428	28.5734	32.3743	33.5044	32.3789	29.7081	27.934	29.262
ENSG00000075539	O94915	285527	FRYL	Protein furry homolog-like OS=Homo sapiens (Human) OX=9606 GN=FRYL PE=1 SV=2 source=Uniprot,https://www.uniprot.org/uniprot/O94915	339.4	17.9848	13.7722	12.7828	14.2825	16.322	13.798	20.1913	16.6624	16.9606	18.1471	16.8536	18.5766	11.847	14.1862	12.285	10.9321	12.6653	10.395	10.8123	14.0595	12.2756	18.0024	13.2499	13.0185
ENSG00000149218	O94919	23052	ENDOD1	Endonuclease domain-containing 1 protein OS=Homo sapiens (Human) OX=9606 GN=ENDOD1 PE=1 SV=2 source=Uniprot,https://www.uniprot.org/uniprot/O94919	55	34.5171	21.7668	25.6424	32.1953	27.4519	36.2359	35.2697	30.2321	29.4131	22.9369	25.3441	26.3152	29.1263	27.3643	28.4	32.7119	36.6846	35.2386	37.6396	30.1041	33.9274	26.2943	30.0969	28.1954
ENSG00000138604	O94923	26035	GLCE	D-glucuronyl C5-epimerase OS=Homo sapiens (Human) OX=9606 GN=GLCE PE=1 SV=3 source=Uniprot,https://www.uniprot.org/uniprot/O94923	70.1	14.9811	15.4464	18.9014	15.2546	15.0185	14.8678	13.2298	16.4503	15.0348	15.8587	14.6122	13.6206	19.4014	17.2872	19.0836	20.4135	20.5962	21.6765	14.549	16.6159	19.1958	13.4669	14.8914	16.9357
ENSG00000115419	O94925	2744	GLS	Glutaminase kidney isoform, mitochondrial OS=Homo sapiens (Human) OX=9606 GN=GLS PE=1 SV=1 source=Uniprot,https://www.uniprot.org/uniprot/O94925	73.4	45.5195	32.5185	50.4063	48.0936	35.521	40.3254	47.4765	37.7699	50.3933	44.6281	39.291	41.5132	94.7511	123.873	77.5419	111.261	112.567	82.955	120.444	94.3266	105.069	80.6495	85.9169	75.0019
ENSG00000249115	O94927	23354	HAUS5	HAUS augmin-like complex subunit 5 OS=Homo sapiens (Human) OX=9606 GN=HAUS5 PE=1 SV=2 source=Uniprot,https://www.uniprot.org/uniprot/O94927	71.6	25.0588	17.9102	21.4651	19.3724	21.0546	25.8321	22.6482	19.6857	25.5003	22.1459	21.5491	23.4252	10.6929	12.8391	10.9615	9.52996	11.5613	9.6709	11.1967	14.1521	10.8157	12.2665	13.2822	10.2661
ENSG00000127663	O94953	23030	KDM4B	Lysine-specific demethylase 4B OS=Homo sapiens (Human) OX=9606 GN=KDM4B PE=1 SV=4 source=Uniprot,https://www.uniprot.org/uniprot/O94953	121.8	74.8757	81.9999	59.8939	63.9729	62.7334	53.028	66.4236	92.3793	74.9603	71.5589	53.1703	63.3021	67.4922	89.8067	60.801	62.3163	49.6103	43.891	58.4003	106.71	87.1714	83.1721	74.6499	102.685
ENSG00000149639	O94964	140710	SOGA1	Protein SOGA1 OS=Homo sapiens (Human) OX=9606 GN=SOGA1 PE=1 SV=2 source=Uniprot,https://www.uniprot.org/uniprot/O94964	159.7	34.0601	30.1308	32.2082	36.531	34.348	39.1306	41.6279	38.1616	45.7196	51.4829	47.358	50.0519	37.8246	45.4436	40.7532	34.2731	33.4651	36.3611	35.552	34.1573	38.2754	37.2762	34.4221	36.3975
ENSG00000172046	O94966	10869	USP19	Ubiquitin carboxyl-terminal hydrolase 19 OS=Homo sapiens (Human) OX=9606 GN=USP19 PE=1 SV=2 source=Uniprot,https://www.uniprot.org/uniprot/O94966	145.6	24.6305	35.9149	30.418	20.5538	24.5646	22.9689	26.164	22.8107	23.6911	23.7017	25.8244	23.1532	20.9704	23.927	22.7206	19.1503	21.4354	22.2844	21.3186	21.8454	26.863	21.3948	20.1258	20.2597
ENSG00000085433	O94967	22911	WDR47	WD repeat-containing protein 47 OS=Homo sapiens (Human) OX=9606 GN=WDR47 PE=1 SV=1 source=Uniprot,https://www.uniprot.org/uniprot/O94967	101.9	86.4947	91.8042	89.0549	107.538	99.3325	107.696	120.94	129.451	133.39	148.263	150.731	131.826	164.559	166.81	164.379	204.48	210.906	197.495	241.76	236.325	227.67	242.622	235.051	234.795
ENSG00000108395	O94972	4591	TRIM37	E3 ubiquitin-protein ligase TRIM37 OS=Homo sapiens (Human) OX=9606 GN=TRIM37 PE=1 SV=2 source=Uniprot,https://www.uniprot.org/uniprot/O94972	107.8	1.29693	1.54767	1.76176	1.61126	1.54958	0.961487	1.59981	1.36872	1.43313	1.71802	1.43378	1.62039	1.54259	1.16322	1.29467	1.50529	1.63666	1.13541	1.44109	1.27906	1.68253	1.44728	1.23692	1.61865
ENSG00000183020	O94973	161	AP2A2	AP-2 complex subunit alpha-2 OS=Homo sapiens (Human) OX=9606 GN=AP2A2 PE=1 SV=2 source=Uniprot,https://www.uniprot.org/uniprot/O94973	103.9	149.06	159.852	137.907	130.121	145.779	133.281	137.789	139.89	152.469	155.319	140.945	160.054	149.547	178.623	165.746	158.944	166.652	158.996	158.974	156.464	159.38	178.223	157.216	165.096
ENSG00000138674	O94979	22872	SEC31A	Protein transport protein Sec31A OS=Homo sapiens (Human) OX=9606 GN=SEC31A PE=1 SV=3 source=Uniprot,https://www.uniprot.org/uniprot/O94979	132.9	207.512	214.069	208	237.598	218.029	212.907	233.517	212.961	226.301	231.164	231.646	237.886	209.641	240.617	233.689	263.859	248.753	242.473	271.556	231.893	246.061	257.027	252.009	260.551
ENSG00000138640	O94988	10144	FAM13A	Protein FAM13A OS=Homo sapiens (Human) OX=9606 GN=FAM13A PE=1 SV=2 source=Uniprot,https://www.uniprot.org/uniprot/O94988	116.9	9.20299	8.06553	8.21218	9.64516	11.1018	12.4721	11.1209	14.9505	13.9139	13.9049	15.0492	13.1936	6.29452	8.70183	7.08928	7.54296	7.16556	8.3803	14.9649	17.5662	18.8638	33.7809	32.3893	30.043
ENSG00000186834	O94992	10614	HEXIM1	Protein HEXIM1 OS=Homo sapiens (Human) OX=9606 GN=HEXIM1 PE=1 SV=1 source=Uniprot,https://www.uniprot.org/uniprot/O94992	40.6	148.817	160.078	130.509	128.135	153.921	113.515	144.436	116.979	122.835	116.004	106.489	113.751	139.366	136.87	125.672	138.558	174.763	151.393	169.362	238.18	175.668	184.724	132.769	138.199
ENSG00000176490	O95057	148252	DIRAS1	GTP-binding protein Di-Ras1 OS=Homo sapiens (Human) OX=9606 GN=DIRAS1 PE=1 SV=1 source=Uniprot,https://www.uniprot.org/uniprot/O95057	22.3	47.0299	39.5361	47.6	45.8519	38.9728	51.2215	53.5186	54.4866	54.9234	60.7262	54.9954	54.5283	70.1879	76.3921	65.5968	77.4378	81.8187	91.6549	103.56	78.1123	102.906	95.9473	82.5335	80.0969
ENSG00000163684	O95059	11102	RPP14	Ribonuclease P protein subunit p14 OS=Homo sapiens (Human) OX=9606 GN=RPP14 PE=1 SV=3 source=Uniprot,https://www.uniprot.org/uniprot/O95059	13.7	13.7696	15.101	14.0905	9.99976	16.4553	12.1861	14.1811	13.6834	13.0917	13.5608	15.3271	12.5395	11.5117	14.6578	9.2793	11.9748	15.6463	11.7808	14.7858	16.3393	14.0162	16.0849	16.0476	11.2927
ENSG00000104517	O95071	51366	UBR5	E3 ubiquitin-protein ligase UBR5 OS=Homo sapiens (Human) OX=9606 GN=UBR5 PE=1 SV=2 source=Uniprot,https://www.uniprot.org/uniprot/O95071	309.2	65.6795	59.6849	54.3584	57.2608	65.0373	54.1148	58.0524	56.0852	58.2131	57.5406	51.9936	56.0733	50.7846	46.5645	48.2369	45.7294	46.1453	48.9817	47.7825	48.1794	49.3934	48.3864	43.7402	46.5842
ENSG00000156304	O95104	57466	SCAF4	SR-related and CTD-associated factor 4 OS=Homo sapiens (Human) OX=9606 GN=SCAF4 PE=1 SV=3 source=Uniprot,https://www.uniprot.org/uniprot/O95104	125.8	211.731	204.379	196.005	224.271	211.791	186.107	202.777	194.08	209.21	200.474	197.521	191.906	198.579	207.877	198.295	204.59	182.958	187.334	207.126	206.09	217.063	232.745	211.269	215.571
ENSG00000165264	O95139	4712	NDUFB6	NADH dehydrogenase [ubiquinone] 1 beta subcomplex subunit 6 OS=Homo sapiens (Human) OX=9606 GN=NDUFB6 PE=1 SV=3 source=Uniprot,https://www.uniprot.org/uniprot/O95139	15.5	212.374	186.542	203.13	235.894	230.383	195.478	203.906	154.214	189.06	179.271	161.629	179.377	241.563	231.274	219.715	415.029	333.839	295.604	298.998	261.172	266.192	241.6	198.625	193.764
ENSG00000116688	O95140	9927	MFN2	Mitofusin-2 OS=Homo sapiens (Human) OX=9606 GN=MFN2 PE=1 SV=3 source=Uniprot,https://www.uniprot.org/uniprot/O95140	86.3	74.9973	76.0532	72.2648	88.7797	84.0445	98.6901	73.904	71.7455	79.8253	74.2928	77.6265	82.3242	103.93	106.781	116.429	105.727	84.0022	89.8804	100.035	87.923	89.3759	93.4929	90.4021	98.4261
ENSG00000169371	O95149	10073	SNUPN	Snurportin-1 OS=Homo sapiens (Human) OX=9606 GN=SNUPN PE=1 SV=1 source=Uniprot,https://www.uniprot.org/uniprot/O95149	41.1	58.663	80.6045	64.6361	74.6736	63.3968	72.7103	69.7942	70.2302	75.4834	79.4375	76.281	81.8358	68.4679	60.1857	69.3714	77.0303	67.0308	69.224	74.3241	70.0909	64.6287	60.4791	68.7586	71.8192
ENSG00000130939	O95155	10277	UBE4B	Ubiquitin conjugation factor E4 B OS=Homo sapiens (Human) OX=9606 GN=UBE4B PE=1 SV=1 source=Uniprot,https://www.uniprot.org/uniprot/O95155	146.1	55.5229	62.3344	66.8376	53.889	53.8465	56.208	54.0321	54.8282	55.279	54.5513	58.6859	58.0529	54.2939	56.6312	54.9433	53.8297	54.0036	48.8894	48.1257	48.8346	47.6687	46.5585	45.8936	42.8045
ENSG00000162300	O95159	7542	ZFPL1	Zinc finger protein-like 1 OS=Homo sapiens (Human) OX=9606 GN=ZFPL1 PE=1 SV=2 source=Uniprot,https://www.uniprot.org/uniprot/O95159	34.1	108.676	114.944	185.426	95.8265	116.848	85.3275	124.712	115.11	105.601	127.497	112.801	85.4058	115.943	124.389	113.18	111.267	145.9	112.947	133.517	156.316	186.736	140.698	138.289	100.48
ENSG00000070061	O95163	8518	ELP1	Elongator complex protein 1 OS=Homo sapiens (Human) OX=9606 GN=ELP1 PE=1 SV=3 source=Uniprot,https://www.uniprot.org/uniprot/O95163	150.2	85.9508	97.8986	89.2851	73.6395	77.4064	63.858	78.6878	63.6192	68.8578	71.4825	70.0633	68.844	61.896	59.6307	57.2262	62.3177	66.5117	55.0966	63.5681	71.4186	65.718	66.4598	62.562	60.4979
ENSG00000065518	O95168	4710	NDUFB4	NADH dehydrogenase [ubiquinone] 1 beta subcomplex subunit 4 OS=Homo sapiens (Human) OX=9606 GN=NDUFB4 PE=1 SV=3 source=Uniprot,https://www.uniprot.org/uniprot/O95168	15.2	201.229	256.157	279.304	345.72	317.475	469.875	246.567	263.565	289.275	253.375	307.851	340.496	354.785	390.178	708.489	600.459	462.807	484.459	459.18	326.396	359.861	257.802	331.88	327.377
ENSG00000166136	O95169	4714	NDUFB8	NADH dehydrogenase [ubiquinone] 1 beta subcomplex subunit 8, mitochondrial OS=Homo sapiens (Human) OX=9606 GN=NDUFB8 PE=1 SV=1 source=Uniprot,https://www.uniprot.org/uniprot/O95169	21.8	65.1585	64.3259	85.9131	81.3436	89.9887	74.4612	66.1922	59.1397	74.399	69.4988	70.1566	66.0396	81.0016	81.8448	62.0204	113.146	126.124	123.189	107.343	83.2745	99.9941	84.9675	72.8147	67.035
ENSG00000090266	O95178	4708	NDUFB2	NADH dehydrogenase [ubiquinone] 1 beta subcomplex subunit 2, mitochondrial OS=Homo sapiens (Human) OX=9606 GN=NDUFB2 PE=1 SV=1 source=Uniprot,https://www.uniprot.org/uniprot/O95178	12.1	35.5129	40.0431	38.0061	140.977	46.6169	183.781	74.9803	110.88	137.964	108.79	117.594	134.849	150.617	171.206	188.678	228.308	123.456	230.717	205.783	76.114	127.136	46.9113	131.86	139.276
ENSG00000267855	O95182	4701	NDUFA7	NADH dehydrogenase [ubiquinone] 1 alpha subcomplex subunit 7 OS=Homo sapiens (Human) OX=9606 GN=NDUFA7 PE=1 SV=3 source=Uniprot,https://www.uniprot.org/uniprot/O95182	12.5	405.671	452.9	392.727	629.435	559.027	529.956	475.498	415.239	463.103	423.104	465.116	438.63	737.201	629.892	631.871	950.483	831.324	809.156	874.984	579.61	630.227	500.601	546.319	501.907
ENSG00000133318	O95197	10313	RTN3	Reticulon-3 OS=Homo sapiens (Human) OX=9606 GN=RTN3 PE=1 SV=2 source=Uniprot,https://www.uniprot.org/uniprot/O95197	112.5	75.1596	88.3133	85.727	86.7824	87.6231	103.853	87.7494	98.8531	86.4268	94.3906	101.908	86.0675	151.272	127.208	162.956	187.566	166.044	158.987	199.983	178.032	161.721	225.226	142.335	153.258
ENSG00000122386	O95201	7755	ZNF205			5.50653	7.13094	7.04586	7.62173	6.42058	5.43897	6.65836	6.30403	5.51676	6.92101	8.85372	6.12841	7.98321	6.81621	5.8073	11.126	7.81409	6.55183	11.0955	9.21991	10.364	11.7653	7.63521	10.411
ENSG00000168924	O95202	3954	LETM1	Mitochondrial proton/calcium exchanger protein OS=Homo sapiens (Human) OX=9606 GN=LETM1 PE=1 SV=1 source=Uniprot,https://www.uniprot.org/uniprot/O95202	83.3	164.707	189.237	186.855	178.696	198.318	170.759	145.473	145.607	153.361	144.671	149.219	139.465	192.772	207.646	195.345	245.572	255.207	231.39	324.944	305.26	279.868	326.566	257.861	231.659
ENSG00000072134	O95208	22905	EPN2	Epsin-2 OS=Homo sapiens (Human) OX=9606 GN=EPN2 PE=1 SV=3 source=Uniprot,https://www.uniprot.org/uniprot/O95208	68.4	55.3167	62.1837	57.0647	52.9473	62.7064	50.3686	75.3867	66.7764	63.983	100.259	76.4186	76.8369	58.8881	58.1548	53.9763	57.905	64.8929	56.1359	62.0939	61.881	63.8606	74.408	73.1124	64.2496
ENSG00000132485	O95218	9406	ZRANB2	Zinc finger Ran-binding domain-containing protein 2 OS=Homo sapiens (Human) OX=9606 GN=ZRANB2 PE=1 SV=2 source=Uniprot,https://www.uniprot.org/uniprot/O95218	37.4	514.167	636.209	513.605	532.832	529.964	455.257	478.781	475.492	437.272	415.032	441.061	474.338	450.203	470.905	504.414	454.025	421.131	369.843	407.208	441.886	390.301	493.264	420.853	485.861
ENSG00000114520	O95219	8723	SNX4	Sorting nexin-4 OS=Homo sapiens (Human) OX=9606 GN=SNX4 PE=1 SV=1 source=Uniprot,https://www.uniprot.org/uniprot/O95219	51.9	73.7766	82.3824	68.3848	69.8682	73.1957	70.124	87.1869	73.9052	89.8866	91.1773	94.0503	92.1613	90.5021	118.894	112.449	90.1203	102.159	91.2748	118.424	117.292	114.053	121.331	113.971	122.746
ENSG00000108848	O95232	51747	LUC7L3	Luc7-like protein 3 OS=Homo sapiens (Human) OX=9606 GN=LUC7L3 PE=1 SV=2 source=Uniprot,https://www.uniprot.org/uniprot/O95232	51.4	528.571	563.379	492.249	513.322	490.115	461.515	483.168	467.451	479.694	480.805	445.817	452.839	435.434	462.866	461.561	429.875	433.686	407.693	476.42	509.042	473.141	477.746	465.385	471.742
ENSG00000112984	O95235	10112	KIF20A	Kinesin-like protein KIF20A OS=Homo sapiens (Human) OX=9606 GN=KIF20A PE=1 SV=1 source=Uniprot,https://www.uniprot.org/uniprot/O95235	100.2	18.5526	13.2817	12.8162	7.40845	17.5296	14.1905	15.0316	9.06667	11.9852	14.6643	12.5513	12.7735	2.8159	3.03998	5.08257	3.4521	3.63786	4.51163	3.15869	4.28679	5.05278	3.29475	4.14438	4.61322
ENSG00000090889	O95239	24137	KIF4A	Chromosome-associated kinesin KIF4A OS=Homo sapiens (Human) OX=9606 GN=KIF4A PE=1 SV=3 source=Uniprot,https://www.uniprot.org/uniprot/O95239	139.8	113.044	100.929	127.302	88.1307	96.7699	99.4048	102.94	95.748	108.828	118.438	137.569	109.992	35.9722	28.6653	36.2954	29.4013	31.6657	39.315	29.5933	33.1749	33.1024	29.8457	33.6711	30.4785
ENSG00000100241	O95248	6305	SBF1	Myotubularin-related protein 5 OS=Homo sapiens (Human) OX=9606 GN=SBF1 PE=1 SV=4 source=Uniprot,https://www.uniprot.org/uniprot/O95248	208.3	33.2989	29.9773	33.3891	31.4722	31.8457	30.4225	33.7837	32.6895	31.9749	33.6488	35.5514	32.6898	39.3904	38.797	34.4199	32.4483	33.2285	33.1164	36.0103	34.1685	36.9842	41.9139	35.5301	35.5767
ENSG00000108587	O95249	9527	GOSR1	Golgi SNAP receptor complex member 1 OS=Homo sapiens (Human) OX=9606 GN=GOSR1 PE=1 SV=1 source=Uniprot,https://www.uniprot.org/uniprot/O95249	28.6	76.7441	127.062	102.422	89.0191	102.17	133.779	80.9101	94.4421	98.0825	78.7473	97.8854	102.856	93.1433	81.6786	103.093	102.353	100.52	109.903	97.8635	106.971	108.212	87.6817	99.1985	105.652
ENSG00000136504	O95251	11143	KAT7	Histone acetyltransferase KAT7 OS=Homo sapiens (Human) OX=9606 GN=KAT7 PE=1 SV=1 source=Uniprot,https://www.uniprot.org/uniprot/O95251	70.6	85.0272	64.9341	74.2797	86.4248	75.2882	86.3698	83.8651	75.3768	83.2205	83.7564	83.9509	82.2373	75.8734	87.7153	72.9757	73.5471	65.6604	66.0093	64.6013	73.6984	62.3025	68.0114	70.8542	68.8253
ENSG00000102078	O95258	9016	SLC25A14	Brain mitochondrial carrier protein 1 OS=Homo sapiens (Human) OX=9606 GN=SLC25A14 PE=2 SV=1 source=Uniprot,https://www.uniprot.org/uniprot/O95258	36.2	15.4615	16.5702	17.092	15.3881	15.9792	19.5346	14.6246	14.4199	16.9755	18.8347	18.4341	17.0652	21.617	34.0398	36.6453	25.5662	31.5273	28.8677	26.1376	28.6816	27.1627	23.0771	26.3757	24.2373
ENSG00000107669	O95260	11101	ATE1	Arginyl-tRNA--protein transferase 1 OS=Homo sapiens (Human) OX=9606 GN=ATE1 PE=1 SV=2 source=Uniprot,https://www.uniprot.org/uniprot/O95260	59.1	57.7994	82.3236	55.9975	68.5253	68.718	48.2685	71.7225	58.0962	57.3832	65.1653	61.337	57.1196	56.4735	57.8069	49.5479	62.8005	57.6881	48.5602	55.9235	58.4191	52.4246	61.0856	59.5741	51.8882
ENSG00000172575	O95267	10125	RASGRP1	RAS guanyl-releasing protein 1 OS=Homo sapiens (Human) OX=9606 GN=RASGRP1 PE=1 SV=2 source=Uniprot,https://www.uniprot.org/uniprot/O95267	90.3	8.28103	6.74975	10.2936	5.39816	10.5069	11.1718	9.80907	18.6197	13.3876	18.3538	10.5287	12.4405	3.45017	7.25925	10.4996	4.88015	6.42304	9.56843	6.36827	9.07952	10.1163	16.8009	12.0978	12.5225
ENSG00000124164	O95292	9217	VAPB	Vesicle-associated membrane protein-associated protein B/C OS=Homo sapiens (Human) OX=9606 GN=VAPB PE=1 SV=3 source=Uniprot,https://www.uniprot.org/uniprot/O95292	27.2	428.352	467.445	397.004	456.209	432.082	480.96	441.322	420.372	435.152	394.589	431.848	431.541	676.8	667.031	651.651	673.7	634.634	598.232	688.486	611.244	544.356	575.103	578.016	577.043
ENSG00000143553	O95295	23557	SNAPIN	SNARE-associated protein Snapin OS=Homo sapiens (Human) OX=9606 GN=SNAPIN PE=1 SV=1 source=Uniprot,https://www.uniprot.org/uniprot/O95295	14.9	139.681	115.413	143.32	95.6632	94.2901	79.0274	126.026	93.8959	90.3666	98.9271	113.499	84.0183	114.809	87.8	87.7481	95.19	103.667	95.0517	104.931	111.269	137.244	167.648	118.952	86.346
ENSG00000151366	O95298	4718	NDUFC2	NADH dehydrogenase [ubiquinone] 1 subunit C2 OS=Homo sapiens (Human) OX=9606 GN=NDUFC2 PE=1 SV=1 source=Uniprot,https://www.uniprot.org/uniprot/O95298	14.2	153.594	194.104	197.247	295.01	254.638	268.243	186.485	179.569	213.584	185.072	222.211	210.231	306.73	285.262	295.547	434.358	385.229	390.9	372.188	258.943	292.467	208.116	253.336	238.578
ENSG00000130414	O95299	4705	NDUFA10	NADH dehydrogenase [ubiquinone] 1 alpha subcomplex subunit 10, mitochondrial OS=Homo sapiens (Human) OX=9606 GN=NDUFA10 PE=1 SV=1 source=Uniprot,https://www.uniprot.org/uniprot/O95299	40.7	164.563	174.97	204.846	242.551	212.296	194.626	188.013	157.537	186.471	156.635	215.833	177.795	282.029	243.208	216.714	355.25	316.348	286.858	300.085	216.092	240.952	202.27	206.536	186.699
ENSG00000122642	O95302	11328	FKBP9	Peptidyl-prolyl cis-trans isomerase FKBP9 OS=Homo sapiens (Human) OX=9606 GN=FKBP9 PE=1 SV=2 source=Uniprot,https://www.uniprot.org/uniprot/O95302	63	82.7941	64.9174	76.6575	100.064	125.395	99.1688	77.0508	118.462	89.3356	80.7565	84.2969	76.7531	54.1581	29.1061	42.0508	48.1072	36.9052	50.4034	50.1972	42.5309	55.4344	44.7413	67.4572	64.2094
ENSG00000048740	O95319	10659	CELF2	CUGBP Elav-like family member 2 OS=Homo sapiens (Human) OX=9606 GN=CELF2 PE=1 SV=1 source=Uniprot,https://www.uniprot.org/uniprot/O95319	54.3	383.28	352.003	362.414	337.354	354.536	405.447	345.736	360.78	385.368	346.407	325.48	344.092	527.227	568.8	642.62	575.347	629.186	587.199	670.127	562.773	584.146	526.305	448.79	470.468
ENSG00000130313	O95336	25796	PGLS	6-phosphogluconolactonase OS=Homo sapiens (Human) OX=9606 GN=PGLS PE=1 SV=2 source=Uniprot,https://www.uniprot.org/uniprot/O95336	27.5	555.532	584.444	526.481	481.651	522.873	451.664	597.212	550.793	543.53	585.999	596.859	566.621	534.279	636.633	568.47	527.218	576.37	543.664	669.249	628.081	626.111	721.387	615.795	690.106
ENSG00000136824	O95347	10592	SMC2	Structural maintenance of chromosomes protein 2 OS=Homo sapiens (Human) OX=9606 GN=SMC2 PE=1 SV=2 source=Uniprot,https://www.uniprot.org/uniprot/O95347	135.6	362.509	307.487	378.594	315.589	309.357	298.372	351.607	304.021	325.305	411.291	397.094	333.524	103.817	91.9857	108.575	92.8555	98.9347	104.524	95.2644	107.874	111.797	103.598	105.998	92.4311
ENSG00000197548	O95352	10533	ATG7	Ubiquitin-like modifier-activating enzyme ATG7 OS=Homo sapiens (Human) OX=9606 GN=ATG7 PE=1 SV=1 source=Uniprot,https://www.uniprot.org/uniprot/O95352	77.9	44.7499	52.8655	52.8874	40.6924	47.1344	34.4428	46.3824	41.9323	40.5127	43.2512	40.9096	38.5758	34.5671	36.1792	32.157	33.831	33.986	29.9545	34.6855	33.3682	34.8959	38.7638	33.9545	32.3256
ENSG00000138162	O95359	10579	TACC2	Transforming acidic coiled-coil-containing protein 2 OS=Homo sapiens (Human) OX=9606 GN=TACC2 PE=1 SV=3 source=Uniprot,https://www.uniprot.org/uniprot/O95359	309.2	6.57724	9.44848	7.19901	7.71047	5.83933	6.31363	8.61371	7.21311	8.09701	7.91969	8.02093	7.68027	13.0743	13.4605	13.904	13.5845	11.5962	11.6757	11.3768	10.7949	11.4154	13.5289	11.6448	12.9016
ENSG00000145982	O95363	10667	FARS2	Phenylalanine--tRNA ligase, mitochondrial OS=Homo sapiens (Human) OX=9606 GN=FARS2 PE=1 SV=1 source=Uniprot,https://www.uniprot.org/uniprot/O95363	52.3	26.0714	27.1927	33.8169	28.0519	25.6477	28.6984	25.2673	23.035	31.029	26.1144	28.8828	34.2165	29.4124	32.5944	38.0785	32.6252	29.9813	31.7573	28.776	25.8177	33.7072	24.0926	27.2659	29.4779
ENSG00000011009	O95372	11313	LYPLA2	Acyl-protein thioesterase 2 OS=Homo sapiens (Human) OX=9606 GN=LYPLA2 PE=1 SV=1 source=Uniprot,https://www.uniprot.org/uniprot/O95372	24.7	141.897	228.424	180.258	169.538	180.399	181.459	129.107	155.01	157.315	126.926	138.828	141.458	222.98	285.001	268.333	225.449	250.447	273.067	215.479	222.421	206.422	119.007	161.993	163.174
ENSG00000205339	O95373	10527	IPO7	Importin-7 OS=Homo sapiens (Human) OX=9606 GN=IPO7 PE=1 SV=1 source=Uniprot,https://www.uniprot.org/uniprot/O95373	119.4	296.697	265.403	226.536	210.735	291.304	224.992	240.649	194.155	228.315	240.436	187.882	221.552	167.606	167.081	191.874	177.094	248.602	192.895	214.39	220.72	201.564	231.867	167.651	177.737
ENSG00000177479	O95376	10425	ARIH2	E3 ubiquitin-protein ligase ARIH2 OS=Homo sapiens (Human) OX=9606 GN=ARIH2 PE=1 SV=1 source=Uniprot,https://www.uniprot.org/uniprot/O95376	57.8	75.0163	75.4728	74.5859	66.8896	73.3871	59.1009	68.9532	64.2217	65.4238	70.4146	65.483	65.3203	59.4605	66.897	55.3163	62.6131	66.7509	61.9907	69.8503	71.5117	67.6302	70.1448	61.9248	61.6208
ENSG00000164609	O95391	10569	SLU7	Pre-mRNA-splicing factor SLU7 OS=Homo sapiens (Human) OX=9606 GN=SLU7 PE=1 SV=2 source=Uniprot,https://www.uniprot.org/uniprot/O95391	68.3	41.9163	39.281	44.4897	46.9218	39.0579	39.4557	41.0956	44.6555	41.0887	41.5108	46.8539	45.3322	38.0664	36.8817	33.1365	34.5313	30.3366	29.1232	34.7029	37.4544	35.8323	42.5691	40.0021	40.8017
ENSG00000013375	O95394	5238	PGM3	Phosphoacetylglucosamine mutase OS=Homo sapiens (Human) OX=9606 GN=PGM3 PE=1 SV=1 source=Uniprot,https://www.uniprot.org/uniprot/O95394	59.8	190.875	204.124	233.723	229.161	247.174	195.889	228.371	245.158	218.793	223.583	219.253	223.182	149.06	143.033	160.536	147.792	145.565	143.406	150.783	149.759	164.766	154.121	162.237	160.383
ENSG00000124217	O95396	27304	MOCS3	Adenylyltransferase and sulfurtransferase MOCS3 OS=Homo sapiens (Human) OX=9606 GN=MOCS3 PE=1 SV=1 source=Uniprot,https://www.uniprot.org/uniprot/O95396	49.6	61.2193	78.8081	64.471	56.6372	69.6782	44.2914	56.1438	50.4386	52.0471	52.5588	45.9102	48.1939	53.4247	54.4449	45.0999	50.1347	63.5383	51.3853	67.4904	82.0225	69.8975	66.1616	53.5668	54.8064
ENSG00000049247	O95399	10911	UTS2			50.0926	80.831	54.649	36.0791	55.4	18.8723	44.7934	30.1981	36.5475	37.6094	17.9931	29.2496	34.9614	29.5311	21.2213	34.0423	64.4757	25.1664	42.1639	48.2328	45.9411	43.6669	26.7758	27.7603
ENSG00000169217	O95400	10421	CD2BP2	CD2 antigen cytoplasmic tail-binding protein 2 OS=Homo sapiens (Human) OX=9606 GN=CD2BP2 PE=1 SV=1 source=Uniprot,https://www.uniprot.org/uniprot/O95400	37.6	208.907	179.742	199.237	213.783	216.146	234.033	205.422	227.046	229.929	225.064	221.722	228.138	183.915	181.322	178.283	167.037	168.69	183.935	216.461	197.736	188.308	200.963	203.336	196.771
ENSG00000157077	O95405	9372	ZFYVE9	Zinc finger FYVE domain-containing protein 9 OS=Homo sapiens (Human) OX=9606 GN=ZFYVE9 PE=1 SV=2 source=Uniprot,https://www.uniprot.org/uniprot/O95405	156.3	10.5639	10.3111	9.68623	7.57982	9.47194	9.86799	9.47341	6.55826	9.17695	8.64992	6.3424	8.24202	9.2315	9.12178	12.6623	10.0993	12.9169	8.60433	13.7048	13.8061	11.2347	16.9252	11.0983	12.0801
ENSG00000164713	O95415	25798	BRI3			14.132	25.8852	16.3195	18.5121	24.1878	18.4528	18.2378	21.2396	23.3512	21.3184	21.3518	21.5172	24.2511	21.1738	26.2494	25.3705	26.7344	28.222	27.7222	34.0555	32.3959	25.8292	23.297	29.2991
ENSG00000197321	O95425	6840	SVIL	Supervillin OS=Homo sapiens (Human) OX=9606 GN=SVIL PE=1 SV=2 source=Uniprot,https://www.uniprot.org/uniprot/O95425	247.6	37.1183	31.5467	36.1867	38.0491	45.3619	34.627	28.1327	29.4585	26.8265	22.8127	21.1674	19.6204	26.4373	23.9832	23.683	19.6164	17.6489	18.915	18.0703	20.0164	23.3485	27.7984	23.495	23.9598
ENSG00000197563	O95427	23556	PIGN	GPI ethanolamine phosphate transferase 1 OS=Homo sapiens (Human) OX=9606 GN=PIGN PE=1 SV=1 source=Uniprot,https://www.uniprot.org/uniprot/O95427	105.7	10.671	15.2928	20.9526	15.8354	15.8107	12.667	15.529	16.4981	16.4699	14.9416	21.4677	17.0108	11.1257	11.2719	10.2665	13.0316	11.2236	10.7822	10.8778	11.3837	12.9861	7.60761	15.8145	13.0165
ENSG00000156735	O95429	9530	BAG4	BAG family molecular chaperone regulator 4 OS=Homo sapiens (Human) OX=9606 GN=BAG4 PE=1 SV=1 source=Uniprot,https://www.uniprot.org/uniprot/O95429	49.6	58.9536	72.3815	71.7864	65.7883	69.2619	60.777	55.0543	59.4907	61.7837	62.6165	56.5451	56.9764	74.177	61.5596	57.5263	67.2569	78.3931	57.3395	69.8837	73.4403	63.9471	58.4626	67.5045	59.3944
ENSG00000100591	O95433	10598	AHSA1	Activator of 90 kDa heat shock protein ATPase homolog 1 OS=Homo sapiens (Human) OX=9606 GN=AHSA1 PE=1 SV=1 source=Uniprot,https://www.uniprot.org/uniprot/O95433	38.3	395.656	403.159	418.216	353.306	378.959	284.88	373.931	316.478	322.413	326.876	303.938	291.124	345.799	331.874	301.64	337.749	368.945	313.715	423.058	390.542	373.149	375.955	319.299	316.516
ENSG00000140694	O95453	5073	PARN	Poly(A)-specific ribonuclease PARN OS=Homo sapiens (Human) OX=9606 GN=PARN PE=1 SV=1 source=Uniprot,https://www.uniprot.org/uniprot/O95453	73.4	93.2482	105.711	89.6062	90.9688	89.1585	96.7788	92.3647	87.3972	95.3598	97.6074	92.5458	106.648	73.572	72.6302	71.0986	82.3608	88.1995	79.6705	80.2041	88.7852	80.6392	75.8057	78.2725	79.3458
ENSG00000183527	O95456	8624	PSMG1	Proteasome assembly chaperone 1 OS=Homo sapiens (Human) OX=9606 GN=PSMG1 PE=1 SV=1 source=Uniprot,https://www.uniprot.org/uniprot/O95456	32.8	234.575	315.901	240.478	137.966	202.934	116.689	140.711	97.8837	107.394	107.851	105.416	104.571	81.9203	79.2544	83.7211	72.2889	72.4959	69.5015	74.9671	72.3948	74.0963	81.9234	60.9756	68.2569
ENSG00000184922	O95466	752	FMNL1	Formin-like protein 1 OS=Homo sapiens (Human) OX=9606 GN=FMNL1 PE=1 SV=3 source=Uniprot,https://www.uniprot.org/uniprot/O95466	121.8	1.62228	1.41131	0.99438	1.11962	0.982406	0.894721	1.09985	1.32304	1.06732	1.52801	0.862469	0.694342	1.90619	2.74318	2.65818	2.63271	3.49533	2.61769	2.58724	3.57181	2.87047	3.18178	4.06199	3.80769
ENSG00000166224	O95470	8879	SGPL1	Sphingosine-1-phosphate lyase 1 OS=Homo sapiens (Human) OX=9606 GN=SGPL1 PE=1 SV=3 source=Uniprot,https://www.uniprot.org/uniprot/O95470	63.5	193.885	178.512	182.262	211.743	205.913	235.674	189.465	205.723	189.121	200.349	219.326	199.128	174.234	161.901	167.273	186.169	183.98	157.61	149.761	147.762	149.046	159.363	162.813	161.072
ENSG00000164346	O95478	10412	NSA2	Ribosome biogenesis protein NSA2 homolog OS=Homo sapiens (Human) OX=9606 GN=NSA2 PE=1 SV=1 source=Uniprot,https://www.uniprot.org/uniprot/O95478	30	91.6961	142.7	164.684	141.192	119.756	114.271	96.9475	120.77	98.7426	95.2404	97.811	86.1815	83.3667	82.8134	74.1389	99.2566	78.3033	86.762	117.238	113.992	108.372	72.4862	95.4871	83.5255
ENSG00000049239	O95479	9563	H6PD	GDH/6PGL endoplasmic bifunctional protein OS=Homo sapiens (Human) OX=9606 GN=H6PD PE=1 SV=2 source=Uniprot,https://www.uniprot.org/uniprot/O95479	88.8	76.0279	65.8233	69.8202	70.1384	70.6746	65.4259	72.0212	75.4738	80.1785	64.9524	78.6448	77.4535	46.4072	40.5757	43.8553	46.3892	43.6811	45.6214	41.6796	39.4633	51.1371	44.4314	63.5507	54.044
ENSG00000113615	O95486	10802	SEC24A	Protein transport protein Sec24A OS=Homo sapiens (Human) OX=9606 GN=SEC24A PE=1 SV=2 source=Uniprot,https://www.uniprot.org/uniprot/O95486	119.7	70.4356	83.9511	81.1161	63.9399	82.4402	67.4868	68.0478	60.9574	76.186	70.2624	62.6481	74.4244	67.185	83.5153	81.6132	70.309	95.2935	85.6349	69.951	84.7202	87.7772	73.2893	68.3993	72.4776
ENSG00000138802	O95487	10427	SEC24B	Protein transport protein Sec24B OS=Homo sapiens (Human) OX=9606 GN=SEC24B PE=1 SV=2 source=Uniprot,https://www.uniprot.org/uniprot/O95487	137.3	87.0232	83.5581	102.343	70.4073	90.0743	63.4191	81.7409	70.8851	73.01	80.9845	72.2189	71.2436	70.3615	73.4673	67.6501	71.1237	88.1833	73.8076	75.8125	85.0595	83.7507	91.7403	70.7384	65.5224
ENSG00000221890	O95502	23467	NPTXR	Neuronal pentraxin receptor OS=Homo sapiens (Human) OX=9606 GN=NPTXR PE=3 SV=2 source=Uniprot,https://www.uniprot.org/uniprot/O95502	52.8	15.297	19.4843	19.7668	26.6852	18.8261	38.5422	21.6735	30.4507	33.1618	29.6367	41.0264	43.4831	37.3583	39.6032	54.5906	50.8941	30.2527	39.2706	28.5361	30.9018	29.3343	24.0731	40.7369	48.5717
ENSG00000183741	O95503	23466	CBX6	Chromobox protein homolog 6 OS=Homo sapiens (Human) OX=9606 GN=CBX6 PE=1 SV=1 source=Uniprot,https://www.uniprot.org/uniprot/O95503	43.9	21.0491	12.7596	16.8852	24.6597	17.2689	34.5369	20.2573	25.2547	25.6126	23.5956	26.9508	29.6404	29.1468	36.3296	34.8896	23.8645	18.8602	27.9625	23.3934	20.7194	24.7387	16.3379	24.8748	25.2894
ENSG00000111802	O95551	51567	TDP2	Tyrosyl-DNA phosphodiesterase 2 OS=Homo sapiens (Human) OX=9606 GN=TDP2 PE=1 SV=1 source=Uniprot,https://www.uniprot.org/uniprot/O95551	40.9	20.3433	17.0897	21.8087	18.7779	17.1998	21.9829	17.4035	18.225	21.1734	18.8702	20.0672	21.3194	21.2977	19.1719	21.1605	22.0887	22.9667	21.3721	22.2611	24.4235	21.7787	22.4525	22.4235	22.487
ENSG00000143158	O95563	25874	MPC2	Mitochondrial pyruvate carrier 2 OS=Homo sapiens (Human) OX=9606 GN=MPC2 PE=1 SV=1 source=Uniprot,https://www.uniprot.org/uniprot/O95563	14.3	191.166	194.998	216.729	246.376	238.193	201.097	201.016	212.467	220.045	230.881	263.762	206.314	244.63	256.253	232.444	451.83	357.298	304.769	321.284	278.213	285.89	266.574	282.293	246.505
ENSG00000105755	O95571	23474	ETHE1	Persulfide dioxygenase ETHE1, mitochondrial OS=Homo sapiens (Human) OX=9606 GN=ETHE1 PE=1 SV=2 source=Uniprot,https://www.uniprot.org/uniprot/O95571	27.9	166.397	184.231	188.364	220.661	285.54	153.133	184.05	162.857	169.773	162.82	160.555	145.061	168.785	159.321	131.809	188.916	239.359	170.508	245.575	262.075	244.186	251.578	230.649	199.863
ENSG00000123983	O95573	2181	ACSL3	Long-chain-fatty-acid--CoA ligase 3 OS=Homo sapiens (Human) OX=9606 GN=ACSL3 PE=1 SV=3 source=Uniprot,https://www.uniprot.org/uniprot/O95573	80.4	231.467	211.312	222.778	241.712	264.14	259.11	243.766	210.435	262.937	255.476	244.252	268.567	294.156	259.538	302.063	316.476	327.846	301.93	316.848	314.612	298.258	241.041	243.557	261.016
ENSG00000068654	O95602	25885	POLR1A	DNA-directed RNA polymerase I subunit RPA1 OS=Homo sapiens (Human) OX=9606 GN=POLR1A PE=1 SV=2 source=Uniprot,https://www.uniprot.org/uniprot/O95602	194.7	5.43302	11.357	11.0371	11.6234	10.0225	10.2672	7.72377	9.29965	9.89889	9.59668	10.6352	9.21857	8.52968	7.19268	7.37254	8.51057	6.0345	7.30461	8.64125	7.28334	7.74497	4.30864	8.46133	7.71287
ENSG00000160299	O95613	5116	PCNT	Pericentrin OS=Homo sapiens (Human) OX=9606 GN=PCNT PE=1 SV=4 source=Uniprot,https://www.uniprot.org/uniprot/O95613	377.8	8.42916	7.6138	9.2023	8.47759	7.82169	8.32015	7.94711	7.77052	8.28126	8.19068	7.53083	8.7859	7.75782	7.52442	8.1434	7.08107	6.38713	8.00561	6.5954	7.73472	8.87542	8.00935	7.82321	8.14207
ENSG00000127337	O95619	8089	YEATS4	YEATS domain-containing protein 4 OS=Homo sapiens (Human) OX=9606 GN=YEATS4 PE=1 SV=1 source=Uniprot,https://www.uniprot.org/uniprot/O95619	26.5	228.616	161.677	163.219	212.026	178.791	248.868	215.685	185.465	216.193	211.299	211.055	217.551	207.752	228.586	238.435	187.673	164.131	197.142	185.439	179.554	191.73	202.486	208.949	224.084
ENSG00000066422	O95625	27107	ZBTB11	Zinc finger and BTB domain-containing protein 11 OS=Homo sapiens (Human) OX=9606 GN=ZBTB11 PE=1 SV=2 source=Uniprot,https://www.uniprot.org/uniprot/O95625	119.3	19.281	19.6173	18.8212	18.5533	20.7672	18.7667	18.6049	21.4463	19.7679	22.1835	23.7261	20.4336	23.4688	18.2438	17.1972	19.3725	21.6864	21.4621	21.3222	24.2051	22.8884	18.986	20.4126	22.2504
ENSG00000080802	O95628	4850	CNOT4	CCR4-NOT transcription complex subunit 4 OS=Homo sapiens (Human) OX=9606 GN=CNOT4 PE=1 SV=3 source=Uniprot,https://www.uniprot.org/uniprot/O95628	63.5	48.0592	59.7037	56.0232	56.0407	56.8843	46.4482	51.8622	49.7806	49.3246	57.7285	49.8885	50.4792	53.0891	47.162	47.7917	62.7879	58.8206	47.9081	65.1393	59.6293	53.1272	51.939	46.9112	47.0087
ENSG00000124356	O95630	10617	STAMBP	STAM-binding protein OS=Homo sapiens (Human) OX=9606 GN=STAMBP PE=1 SV=1 source=Uniprot,https://www.uniprot.org/uniprot/O95630	48	75.2156	81.9978	62.9258	77.8556	84.2035	74.1898	85.1391	86.6359	83.5752	82.7072	80.1926	89.0182	65.2257	69.3923	67.4008	61.5259	59.6212	63.093	69.1812	68.5663	69.7989	86.1264	74.5909	76.6197
ENSG00000160917	O95639	10898	CPSF4	Cleavage and polyadenylation specificity factor subunit 4 OS=Homo sapiens (Human) OX=9606 GN=CPSF4 PE=1 SV=1 source=Uniprot,https://www.uniprot.org/uniprot/O95639	30.2	179.808	185.918	125.221	134.465	190.434	145.964	145.353	141.002	137.128	117.775	147.278	161.052	146.006	152.637	155.127	113.752	127.56	117.345	109.099	122.052	106.849	146.256	127.812	145.79
ENSG00000213760	O95670	534	ATP6V1G2	V-type proton ATPase subunit G 2 OS=Homo sapiens (Human) OX=9606 GN=ATP6V1G2 PE=1 SV=1 source=Uniprot,https://www.uniprot.org/uniprot/O95670	13.6	216.575	159.209	148.373	197.233	174.034	164.41	230.476	264.22	228.876	250.03	229.162	217.538	398.61	401.121	393.813	442.25	505.206	548.211	595.109	542.429	579.998	577.508	470.366	542.099
ENSG00000169093	O95671	8623	ASMTL	Probable bifunctional dTTP/UTP pyrophosphatase/methyltransferase protein OS=Homo sapiens (Human) OX=9606 GN=ASMTL PE=1 SV=3 source=Uniprot,https://www.uniprot.org/uniprot/O95671	68.8	175.051	173.68	164.78	154.21	170.649	139.393	157.056	147.636	144.583	160.414	152.563	150.018	134.152	126.989	133.139	136.907	172.11	135.632	144.883	135.098	134.498	126.741	134.565	124.966
ENSG00000101290	O95674	8760	CDS2	Phosphatidate cytidylyltransferase 2 OS=Homo sapiens (Human) OX=9606 GN=CDS2 PE=1 SV=1 source=Uniprot,https://www.uniprot.org/uniprot/O95674	51.4	200.023	262.359	243.266	166.927	235.724	111.424	161.834	129.123	116.03	126.376	112.536	95.4709	204.117	202.054	138.322	197.14	264.738	151.721	191.163	202.012	173.386	219.42	135.397	116.931
ENSG00000213066	O95684	11116	CEP43	FGFR1 oncogene partner OS=Homo sapiens (Human) OX=9606 GN=FGFR1OP PE=1 SV=1 source=Uniprot,https://www.uniprot.org/uniprot/O95684	43	89.213	125.24	76.2121	99.5957	97.1521	102.361	91.5634	79.0514	91.6479	98.3007	88.6156	96.7914	96.166	73.099	85.1222	86.0116	72.95	67.7888	68.8874	69.1605	61.6678	65.1738	75.9838	73.8348
ENSG00000132825	O95685	5509	PPP1R3D	Protein phosphatase 1 regulatory subunit 3D OS=Homo sapiens (Human) OX=9606 GN=PPP1R3D PE=1 SV=1 source=Uniprot,https://www.uniprot.org/uniprot/O95685	32.5	18.5802	22.119	20.1565	25.6644	24.2636	18.9952	22.288	26.6248	20.9881	17.7851	16.6404	20.1612	16.7003	23.645	17.8135	19.0166	15.2343	16.8774	22.5347	24.1931	20.6585	24.3038	27.2374	24.0622
ENSG00000100425	O95696	23774	BRD1	Bromodomain-containing protein 1 OS=Homo sapiens (Human) OX=9606 GN=BRD1 PE=1 SV=1 source=Uniprot,https://www.uniprot.org/uniprot/O95696	119.4	91.9325	68.7595	83.866	81.5323	75.2109	103.473	84.3563	79.9003	83.6769	86.6963	94.7723	84.2253	83.3315	100.436	90.9854	74.1947	69.6931	84.0199	71.1441	80.9387	83.3718	80.9925	84.4769	85.7477
ENSG00000105171	O95707	10775	POP4	Ribonuclease P protein subunit p29 OS=Homo sapiens (Human) OX=9606 GN=POP4 PE=1 SV=2 source=Uniprot,https://www.uniprot.org/uniprot/O95707	25.4	86.4405	72.1086	92.5465	104.182	76.07	84.6019	80.0749	92.909	77.3101	79.8461	95.3963	79.6098	80.9275	91.7601	70.1097	90.5026	64.3536	81.8823	91.7895	71.553	82.0634	83.8052	76.0049	78.1812
ENSG00000128731	O95714	8924	HERC2	E3 ubiquitin-protein ligase HERC2 OS=Homo sapiens (Human) OX=9606 GN=HERC2 PE=1 SV=2 source=Uniprot,https://www.uniprot.org/uniprot/O95714	526.9	3.41942	4.3063	3.65433	3.19422	4.18137	3.36433	3.32558	2.80028	3.59393	3.69912	3.55599	3.75836	3.04709	3.68926	3.882	3.21413	4.00366	3.61614	3.27256	3.67756	3.89831	3.68345	3.18704	3.62138
ENSG00000105514	O95716	9545	RAB3D	Ras-related protein Rab-3D OS=Homo sapiens (Human) OX=9606 GN=RAB3D PE=1 SV=1 source=Uniprot,https://www.uniprot.org/uniprot/O95716	24.3	80.1995	152.047	83.8166	103.582	134.617	73.7267	85.3667	103.961	86.052	91.8346	88.9484	74.652	143.536	179.632	146.471	152.787	138.109	117.389	141.986	116.109	140.73	155.4	104.562	150.93
ENSG00000099940	O95721	9342	SNAP29	Synaptosomal-associated protein 29 OS=Homo sapiens (Human) OX=9606 GN=SNAP29 PE=1 SV=1 source=Uniprot,https://www.uniprot.org/uniprot/O95721	29	144.143	135.88	150.964	185.405	147.892	152.567	186.488	182.253	201.615	215.037	220.093	196.667	178.922	180.722	158.267	179.832	148.142	149.837	173.796	146.43	177.608	158.607	188.331	184.747
ENSG00000100884	O95741	9362	CPNE6	Copine-6 OS=Homo sapiens (Human) OX=9606 GN=CPNE6 PE=1 SV=3 source=Uniprot,https://www.uniprot.org/uniprot/O95741	62	7.45504	5.05248	3.74484	7.48402	4.47564	5.56897	7.13702	5.61903	5.77414	9.03607	5.75739	2.30144	17.716	7.86768	12.4403	31.2203	56.8912	118.426	24.7625	13.7475	13.9777	10.0425	7.82541	8.47811
ENSG00000172939	O95747	9943	OXSR1	Serine/threonine-protein kinase OSR1 OS=Homo sapiens (Human) OX=9606 GN=OXSR1 PE=1 SV=1 source=Uniprot,https://www.uniprot.org/uniprot/O95747	58	210.213	243.332	218.449	153.69	194.742	171.228	171.645	152.041	165.067	153.567	150.062	164.34	174.428	175.571	185.964	170.264	197.898	168.972	181.617	228.908	211.116	242.738	186.716	209.211
ENSG00000152904	O95749	9453	GGPS1	Geranylgeranyl pyrophosphate synthase OS=Homo sapiens (Human) OX=9606 GN=GGPS1 PE=1 SV=1 source=Uniprot,https://www.uniprot.org/uniprot/O95749	34.8	65.6042	86.1554	64.0131	70.3599	68.0683	60.4272	69.4684	63.1405	68.8151	59.2137	58.5973	64.5506	80.2594	92.7947	83.1337	86.3129	81.5177	80.9463	90.8245	84.9697	80.4159	84.0351	78.8211	84.1462
ENSG00000164070	O95757	22824	HSPA4L	Heat shock 70 kDa protein 4L OS=Homo sapiens (Human) OX=9606 GN=HSPA4L PE=1 SV=3 source=Uniprot,https://www.uniprot.org/uniprot/O95757	94.5	176.851	151.258	168.356	220.315	251.676	192.561	200.749	241.437	201.197	153.957	140.018	174.309	109.599	122.777	120.908	114.859	123.98	109.931	125.723	132.366	121.802	117.614	109.804	126.417
ENSG00000119314	O95758	9991	PTBP3	Polypyrimidine tract-binding protein 3 OS=Homo sapiens (Human) OX=9606 GN=PTBP3 PE=1 SV=2 source=Uniprot,https://www.uniprot.org/uniprot/O95758	59.7	29.4158	14.8804	18.2605	16.4598	9.55471	30.5876	22.201	23.3802	20.9263	14.7969	16.9595	17.1313	41.6213	35.4706	54.2153	37.9795	19.465	34.5942	21.9519	15.6448	36.9113	19.4803	15.085	26.1999
ENSG00000128534	O95777	51691	LSM8	U6 snRNA-associated Sm-like protein LSm8 OS=Homo sapiens (Human) OX=9606 GN=LSM8 PE=1 SV=3 source=Uniprot,https://www.uniprot.org/uniprot/O95777	10.4	376.216	425.445	407.552	303.664	436.898	308.446	364.545	333.359	315.94	305.557	322.098	301.818	300.681	314.514	303.553	289.453	382.753	319.128	343.884	420.631	354.063	415.945	328.674	316.061
ENSG00000196961	O95782	160	AP2A1	AP-2 complex subunit alpha-1 OS=Homo sapiens (Human) OX=9606 GN=AP2A1 PE=1 SV=3 source=Uniprot,https://www.uniprot.org/uniprot/O95782	107.5	167.643	172.608	165.89	144.447	163.094	141.594	170.172	154.355	159.163	173.891	173.054	166.002	160.884	160.194	154.826	158.871	168.209	152.169	171.962	168.517	168.949	202.618	184.591	165.56
ENSG00000011451	O95785	58525	WIZ	Protein Wiz OS=Homo sapiens (Human) OX=9606 GN=WIZ PE=1 SV=2 source=Uniprot,https://www.uniprot.org/uniprot/O95785	178.6	94.7693	90.5908	93.7158	97.4597	94.5893	88.7965	84.9238	82.3893	83.5659	84.2726	87.0013	81.4868	82.0102	64.4378	63.2808	79.7661	72.2333	64.3197	70.5989	75.5862	73.96	66.4856	72.1256	69.166
ENSG00000124214	O95793	6780	STAU1	Double-stranded RNA-binding protein Staufen homolog 1 OS=Homo sapiens (Human) OX=9606 GN=STAU1 PE=1 SV=2 source=Uniprot,https://www.uniprot.org/uniprot/O95793	63.1	151.538	213.54	179.996	162.209	181.466	145.567	171.132	155.454	175.632	164.266	148.008	165.52	199.893	187.968	194.964	196.336	209.185	179.12	228.309	235.684	207.722	192.667	176.775	193.49
ENSG00000243725	O95801	7268	TTC4	Tetratricopeptide repeat protein 4 OS=Homo sapiens (Human) OX=9606 GN=TTC4 PE=1 SV=3 source=Uniprot,https://www.uniprot.org/uniprot/O95801	44.7	36.0036	26.5103	27.4574	28.5822	24.6263	41.0001	29.0605	23.4511	32.7759	26.4599	26.8049	36.971	18.5867	17.8974	29.7722	20.7427	15.8729	30.7542	22.4151	19.1639	22.6582	19.7343	20.3095	27.7588
ENSG00000112208	O95816	9532	BAG2	BAG family molecular chaperone regulator 2 OS=Homo sapiens (Human) OX=9606 GN=BAG2 PE=1 SV=1 source=Uniprot,https://www.uniprot.org/uniprot/O95816	23.8	64.181	59.2161	70.2701	37.0876	41.0402	42.0387	67.9015	50.4204	54.2192	81.6152	64.219	62.4412	35.7796	70.2882	34.1414	43.1086	34.6033	31.7796	32.8715	37.7723	46.4654	49.0709	60.8067	56.6943
ENSG00000151929	O95817	9531	BAG3	BAG family molecular chaperone regulator 3 OS=Homo sapiens (Human) OX=9606 GN=BAG3 PE=1 SV=3 source=Uniprot,https://www.uniprot.org/uniprot/O95817	61.6	47.8588	38.5144	34.5353	32.586	36.7377	28.0786	41.31	44.8223	35.8928	27.8678	34.0846	34.9485	17.2073	23.9336	19.1926	26.2036	31.5806	25.0319	31.4402	37.4774	32.0779	42.3227	35.9508	27.4127
ENSG00000071054	O95819	9448	MAP4K4	Mitogen-activated protein kinase kinase kinase kinase 4 OS=Homo sapiens (Human) OX=9606 GN=MAP4K4 PE=1 SV=2 source=Uniprot,https://www.uniprot.org/uniprot/O95819	142	95.7184	72.929	98.1393	121.705	83.0608	149.104	115.831	115.594	130.925	141.423	150.208	146.088	153.946	138.373	190.544	144.48	120.308	157.116	148.004	127.956	138.444	128.655	146.867	152.399
ENSG00000103150	O95822	23417	MLYCD	Malonyl-CoA decarboxylase, mitochondrial OS=Homo sapiens (Human) OX=9606 GN=MLYCD PE=1 SV=3 source=Uniprot,https://www.uniprot.org/uniprot/O95822	55	29.4784	30.6544	28.0811	31.8874	28.5072	37.5785	29.1732	25.1143	28.8201	26.7342	29.0716	30.7715	48.1439	39.8407	43.2804	51.997	44.3449	43.0795	43.4858	40.4869	38.7365	37.5401	39.3284	37.8429
ENSG00000205758	O95825	9946	CRYZL1	Quinone oxidoreductase-like protein 1 OS=Homo sapiens (Human) OX=9606 GN=CRYZL1 PE=1 SV=2 source=Uniprot,https://www.uniprot.org/uniprot/O95825	38.7	170.098	225.401	192.316	199.473	194.753	171.429	176.468	211.355	190.389	160.557	170.22	166.086	190.827	203.333	186.856	238.774	265.134	224.333	245.387	251.536	243.32	214.488	229.636	213.256
ENSG00000156709	O95831	9131	AIFM1	Apoptosis-inducing factor 1, mitochondrial OS=Homo sapiens (Human) OX=9606 GN=AIFM1 PE=1 SV=1 source=Uniprot,https://www.uniprot.org/uniprot/O95831	66.9	170.688	209.957	199.739	209.675	216.368	195.942	168.081	154.202	189.787	156.37	170.861	176.556	268.953	227.399	232.779	349.595	329.083	282.1	285.112	265.162	263.804	200.213	231.503	212.856
ENSG00000131023	O95835	9113	LATS1	Serine/threonine-protein kinase LATS1 OS=Homo sapiens (Human) OX=9606 GN=LATS1 PE=1 SV=1 source=Uniprot,https://www.uniprot.org/uniprot/O95835	126.8	7.65861	8.08548	8.17499	6.64157	7.5144	8.63521	6.94379	6.96724	8.14321	6.97309	7.05175	8.45096	5.74045	7.20005	8.13995	7.07874	7.59071	7.5709	6.24374	7.67438	8.45358	7.47661	7.03624	7.14375
ENSG00000106537	O95857	27075	TSPAN13	Tetraspanin-13 OS=Homo sapiens (Human) OX=9606 GN=TSPAN13 PE=2 SV=1 source=Uniprot,https://www.uniprot.org/uniprot/O95857	22.1	20.5222	30.213	26.4496	24.5971	20.312	20.906	16.4577	20.3244	21.9483	10.26	10.9694	11.3104	56.1805	43.5111	43.39	36.8589	38.495	31.6756	39.3536	40.076	44.3335	43.0962	32.6813	33.3535
ENSG00000162813	O95861	10380	BPNT1	3'(2'),5'-bisphosphate nucleotidase 1 OS=Homo sapiens (Human) OX=9606 GN=BPNT1 PE=1 SV=1 source=Uniprot,https://www.uniprot.org/uniprot/O95861	33.4	170.256	146.617	160.259	175.224	155.139	163.817	196.574	196.787	181.432	197.859	227.75	209.286	185.691	227.894	186.527	185.606	178.173	204.809	210.308	185.997	196.297	235.405	237.87	238.601
ENSG00000134824	O95864	9415	FADS2	Acyl-CoA 6-desaturase OS=Homo sapiens (Human) OX=9606 GN=FADS2 PE=1 SV=1 source=Uniprot,https://www.uniprot.org/uniprot/O95864	52.2	315.126	276.876	383.649	299.987	223.971	261.766	194.013	203.315	200.216	180.79	159.565	159.081	214.228	197.732	224.92	202.872	213.679	175.205	186.811	170.925	170.296	125.231	122.415	110.853
ENSG00000213722	O95865	23564	DDAH2	N(G),N(G)-dimethylarginine dimethylaminohydrolase 2 OS=Homo sapiens (Human) OX=9606 GN=DDAH2 PE=1 SV=1 source=Uniprot,https://www.uniprot.org/uniprot/O95865	29.6	662.321	808.642	596.155	607.707	622.504	582.113	727.821	692.12	699.633	762.801	765.043	716.001	826.773	964.977	890.212	910.811	977.706	883.268	1090.82	1251.95	1186.84	1702.53	1341.35	1461.61
ENSG00000204427	O95870	7920	ABHD16A	Phosphatidylserine lipase ABHD16A OS=Homo sapiens (Human) OX=9606 GN=ABHD16A PE=1 SV=3 source=Uniprot,https://www.uniprot.org/uniprot/O95870	63.2	138.662	133.832	147.064	117.589	135.827	115.192	128.169	124.68	135.978	136.212	120.998	126.572	138.776	149.422	133.757	162.82	200.595	158.706	187.104	192.314	189.372	187.236	165.029	168.067
ENSG00000117862	O95881	51060	TXNDC12	Thioredoxin domain-containing protein 12 OS=Homo sapiens (Human) OX=9606 GN=TXNDC12 PE=1 SV=1 source=Uniprot,https://www.uniprot.org/uniprot/O95881	19.2	368.24	417.555	383.799	377.333	385.032	349.67	370.786	330.137	351.179	327.373	336.242	356.202	225.394	206.394	216.933	216.643	226.437	202.087	205.014	229.04	182.309	193.373	233.692	204.303
ENSG00000117614	O95926	25949	SYF2	Pre-mRNA-splicing factor SYF2 OS=Homo sapiens (Human) OX=9606 GN=SYF2 PE=1 SV=1 source=Uniprot,https://www.uniprot.org/uniprot/O95926	28.7	146.081	156.865	145.415	228.12	178.98	278.826	194.197	210.466	233.527	203.691	243.091	261.516	171.78	178.926	235.524	193.709	146.355	207.065	167.173	184.986	177.205	132.305	201.388	241.329
ENSG00000163508	O95936	8320	EOMES	Eomesodermin homolog OS=Homo sapiens (Human) OX=9606 GN=EOMES PE=1 SV=3 source=Uniprot,https://www.uniprot.org/uniprot/O95936	72.7	52.7731	35.343	43.0369	101.109	118.682	97.7901	91.149	132.55	138.237	138.288	71.8219	114.321	25.5683	31.0609	24.8469	25.9233	27.3495	21.5134	23.6313	28.7858	19.6411	28.8296	28.1477	21.9376
ENSG00000071655	O95983	53615	MBD3	Methyl-CpG-binding domain protein 3 OS=Homo sapiens (Human) OX=9606 GN=MBD3 PE=1 SV=1 source=Uniprot,https://www.uniprot.org/uniprot/O95983	32.8	398.495	275.151	280.606	224.133	306.208	281.863	290.244	226.033	243.191	261.565	239.676	246.851	235.527	178.714	218.23	232.241	289.703	251.572	249.646	278.252	258.286	363.549	210.428	229.042
ENSG00000100038	O95985	8940	TOP3B	DNA topoisomerase 3-beta-1 OS=Homo sapiens (Human) OX=9606 GN=TOP3B PE=1 SV=1 source=Uniprot,https://www.uniprot.org/uniprot/O95985	96.6	31.0981	29.8922	39.4362	35.0268	28.2111	35.193	29.1954	36.265	35.5075	31.8015	38.5277	35.5117	32.4924	36.2905	37.3488	44.3396	38.3136	39.9708	36.4174	29.912	41.0287	26.774	32.7209	28.6553
ENSG00000272325	O95989	11165	NUDT3	Diphosphoinositol polyphosphate phosphohydrolase 1 OS=Homo sapiens (Human) OX=9606 GN=NUDT3 PE=1 SV=1 source=Uniprot,https://www.uniprot.org/uniprot/O95989	19.5	332.324	261.979	251.112	270.423	270.46	234.282	318.836	314.58	314.281	302.261	287.505	285.778	437.919	512.364	392.251	404.207	523.743	410.457	498.005	513.307	507.298	557.102	452.552	438.787
ENSG00000115266	O95996	10297	APC2	Adenomatous polyposis coli protein 2 OS=Homo sapiens (Human) OX=9606 GN=APC2 PE=1 SV=1 source=Uniprot,https://www.uniprot.org/uniprot/O95996	243.8	5.0448	5.4405	5.86039	6.93822	5.55439	6.35271	5.84913	6.53793	5.98199	7.13985	7.92024	6.6873	9.01316	9.40928	9.80265	8.51403	5.77746	6.88853	8.61576	7.42164	8.00984	8.53693	8.25097	8.49024
ENSG00000142867	O95999	8915	BCL10	B-cell lymphoma/leukemia 10 OS=Homo sapiens (Human) OX=9606 GN=BCL10 PE=1 SV=1 source=Uniprot,https://www.uniprot.org/uniprot/O95999	26.2	167.851	152.509	160.403	125.67	129.331	113.583	148.018	132.025	129.73	131.375	134.133	128.129	117.703	114.306	106.547	110.512	126.742	100.824	114.064	121.995	116.611	141.803	115.448	118.13
ENSG00000140990	O96000	4716	NDUFB10	NADH dehydrogenase [ubiquinone] 1 beta subcomplex subunit 10 OS=Homo sapiens (Human) OX=9606 GN=NDUFB10 PE=1 SV=3 source=Uniprot,https://www.uniprot.org/uniprot/O96000	20.8	267.1	331.428	344.196	584.429	368.852	503.649	337.101	359.199	410.393	330.499	385.615	406.165	601.162	565.479	571.878	960.011	568.558	768.66	611.266	403.109	484.055	337.099	430.138	462.23
ENSG00000106341	O96001	10842	PPP1R17	Protein phosphatase 1 regulatory subunit 17 OS=Homo sapiens (Human) OX=9606 GN=PPP1R17 PE=1 SV=2 source=Uniprot,https://www.uniprot.org/uniprot/O96001	17.9	67.6221	46.2361	56.9469	148.772	131.923	184.415	136.812	394.08	250.571	185.337	171.986	232.667	142.855	74.1884	67.0785	88.5843	87.8167	98.8935	58.6174	73.2146	77.6781	51.2819	64.6008	67.5053
ENSG00000104853	O96005	1209	CLPTM1	Cleft lip and palate transmembrane protein 1 OS=Homo sapiens (Human) OX=9606 GN=CLPTM1 PE=1 SV=1 source=Uniprot,https://www.uniprot.org/uniprot/O96005	76	58.4088	61.1624	66.3953	90.576	53.1081	51.7005	58.1588	57.2658	61.9365	64.1281	60.7536	53.0341	75.3843	56.1246	55.9183	69.7455	59.6955	61.5993	63.877	63.3146	73.3421	62.924	58.0575	62.0671
ENSG00000214717	O96006	9189	ZBED1	Zinc finger BED domain-containing protein 1 OS=Homo sapiens (Human) OX=9606 GN=ZBED1 PE=1 SV=1 source=Uniprot,https://www.uniprot.org/uniprot/O96006	78.1	56.2427	40.582	40.6118	27.9725	43.6885	43.581	40.3816	38.8227	42.283	53.2674	42.537	48.4182	19.8508	36.4766	36.598	23.9022	32.3817	32.1753	35.6608	37.1776	38.8722	42.9211	35.8001	41.0339
ENSG00000164172	O96007	4338	MOCS2	Molybdopterin synthase catalytic subunit OS=Homo sapiens (Human) OX=9606 GN=MOCS2 PE=1 SV=1 source=Uniprot,https://www.uniprot.org/uniprot/O96007	20.9	10.6793	11.8548	8.27325	13.7098	13.1852	17.9077	11.5111	15.1344	12.6583	12.6635	14.2941	16.5006	8.16085	8.87414	12.9558	11.8073	10.1213	10.9073	8.21749	7.43639	7.29083	5.86453	7.46786	7.72718
ENSG00000130204	O96008	10452	TOMM40	Mitochondrial import receptor subunit TOM40 homolog OS=Homo sapiens (Human) OX=9606 GN=TOMM40 PE=1 SV=1 source=Uniprot,https://www.uniprot.org/uniprot/O96008	37.9	336.478	390.437	329.642	289.686	363.754	244.961	299.643	213.177	256.943	276.867	242.227	254.238	304.73	264.809	263.617	339.808	390.078	303.427	388.823	459.223	365.777	404.48	292.225	298.704
ENSG00000131779	O96011	8799	PEX11B	Peroxisomal membrane protein 11B OS=Homo sapiens (Human) OX=9606 GN=PEX11B PE=1 SV=1 source=Uniprot,https://www.uniprot.org/uniprot/O96011	28.4	97.152	104.66	101.838	67.1197	86.9855	49.6361	81.7419	61.3764	64.1302	69.9681	60.1994	53.5742	79.2413	87.4944	74.9429	73.0084	97.6607	61.4238	94.3238	115.414	100.481	134.494	83.5746	72.6957
ENSG00000130669	O96013	10298	PAK4	Serine/threonine-protein kinase PAK 4 OS=Homo sapiens (Human) OX=9606 GN=PAK4 PE=1 SV=1 source=Uniprot,https://www.uniprot.org/uniprot/O96013	64	40.5227	62.6848	45.4721	59.8842	54.6292	59.3339	55.1994	51.2277	50.0058	102.977	51.314	58.7737	28.1722	41.9848	54.4243	22.7093	42.0656	40.7039	24.8955	41.8948	35.5797	18.8756	44.0599	39.7962
ENSG00000100246	O96015	10126	DNAL4	Dynein light chain 4, axonemal OS=Homo sapiens (Human) OX=9606 GN=DNAL4 PE=1 SV=1 source=Uniprot,https://www.uniprot.org/uniprot/O96015	12	32.5489	31.8428	31.7528	30.0448	26.1478	26.6603	31.0786	28.3377	29.4113	28.9563	26.7713	29.6802	33.1555	34.4544	33.4418	30.6599	25.0692	33.0751	33.4357	25.8157	33.94	29.2915	25.4152	35.3939
ENSG00000183765	O96017	11200	CHEK2	Serine/threonine-protein kinase Chk2 OS=Homo sapiens (Human) OX=9606 GN=CHEK2 PE=1 SV=1 source=Uniprot,https://www.uniprot.org/uniprot/O96017	60.9	69.2796	62.3856	65.2749	69.5209	70.7882	67.3439	60.072	61.4164	61.5111	65.7174	54.4448	60.6312	43.7412	33.3983	41.8538	37.5558	38.7849	39.6595	35.4297	37.2907	37.2485	31.5808	34.4548	38.9581
ENSG00000136518	O96019	86	ACTL6A	Actin-like protein 6A OS=Homo sapiens (Human) OX=9606 GN=ACTL6A PE=1 SV=1 source=Uniprot,https://www.uniprot.org/uniprot/O96019	47.4	315.143	312.637	375.467	269.893	278.528	203.183	275.713	258.338	246.657	267.952	257.246	232.534	224.155	192.274	165.225	173.79	198.753	166.673	169.597	201.315	203.508	189.433	190.986	172.397
ENSG00000109685	O96028	7468	NSD2	Histone-lysine N-methyltransferase NSD2 OS=Homo sapiens (Human) OX=9606 GN=NSD2 PE=1 SV=1 source=Uniprot,https://www.uniprot.org/uniprot/O96028	152.2	190.428	171.955	188.911	168.103	180.32	179.986	166.584	162.549	174.821	168.488	177.241	168.451	125.667	125.376	125.917	109.583	104.979	104.32	104.25	109.963	110.336	113.129	114.123	114.267
ENSG00000166347	P00167	1528	CYB5A	Cytochrome b5 OS=Homo sapiens (Human) OX=9606 GN=CYB5A PE=1 SV=2 source=Uniprot,https://www.uniprot.org/uniprot/P00167	15.3	331.114	314.317	386.967	408.054	530.108	416.72	364.756	419.118	351.075	443.779	415.693	380.885	347.118	318.615	312.013	397.173	451.821	350.936	369.161	426.55	400.916	471.814	471.084	427.767
ENSG00000134333	P00338	3939	LDHA	L-lactate dehydrogenase A chain OS=Homo sapiens (Human) OX=9606 GN=LDHA PE=1 SV=2 source=Uniprot,https://www.uniprot.org/uniprot/P00338	36.7	1617.89	986.367	677.18	524.471	569.243	673.956	701.677	959.135	861.226	444.328	488.015	814.098	1277.27	819.085	604.748	545.726	491.503	612.871	480.613	667.071	624.33	438.353	584.679	934.008
ENSG00000165092	P00352	216	ALDH1A1	Retinal dehydrogenase 1 OS=Homo sapiens (Human) OX=9606 GN=ALDH1A1 PE=1 SV=2 source=Uniprot,https://www.uniprot.org/uniprot/P00352	54.8	122.612	102.049	36.7144	34.0953	45.875	39.8604	50.8159	46.5819	50.2628	50.0787	73.278	43.1298	51.7836	94.4982	48.9756	36.5219	53.4393	49.4972	65.8508	44.9093	56.171	193.915	102.581	151.927
ENSG00000148672	P00367	2746	GLUD1	Glutamate dehydrogenase 1, mitochondrial OS=Homo sapiens (Human) OX=9606 GN=GLUD1 PE=1 SV=2 source=Uniprot,https://www.uniprot.org/uniprot/P00367	61.4	367.713	344.392	379.547	528.279	469.722	491.974	359.903	347.756	368.286	317.56	358.242	360.885	372.901	313.475	342.044	389.865	302.296	331.647	313.384	261.1	294.949	251.609	302.68	289.399
ENSG00000228716	P00374	1719	DHFR	Dihydrofolate reductase OS=Homo sapiens (Human) OX=9606 GN=DHFR PE=1 SV=2 source=Uniprot,https://www.uniprot.org/uniprot/P00374	21.4	303.443	194.037	334.924	251.433	194.441	241.715	233.474	214.089	260.646	264.186	246.001	248.671	71.6122	68.259	84.811	80.1809	60.4847	74.3343	68.5619	65.1349	75.4214	75.4468	74.2925	64.641
ENSG00000100243	P00387	1727	CYB5R3	NADH-cytochrome b5 reductase 3 OS=Homo sapiens (Human) OX=9606 GN=CYB5R3 PE=1 SV=3 source=Uniprot,https://www.uniprot.org/uniprot/P00387	34.2	576.189	603.354	552.138	547.418	679.263	493.533	546.526	566.625	511.023	534.673	534.95	484.813	580.484	563.168	516.68	680.037	784.319	588.207	616.203	702.524	640.958	695.439	627.198	585.128
ENSG00000104687	P00390	2936	GSR	Glutathione reductase, mitochondrial OS=Homo sapiens (Human) OX=9606 GN=GSR PE=1 SV=2 source=Uniprot,https://www.uniprot.org/uniprot/P00390	56.2	218.515	214.737	220.142	219.047	171.181	197.77	245.005	244.668	233.564	260.292	275.298	266.878	239.62	259.776	254.362	256.382	229.415	230.996	287.04	234.738	258.546	310.142	327.268	316.355
ENSG00000198712	P00403	4513	MT-CO2	Cytochrome c oxidase subunit 2 OS=Homo sapiens (Human) OX=9606 GN=MT-CO2 PE=1 SV=1 source=Uniprot,https://www.uniprot.org/uniprot/P00403	25.5	232.83	260.48	356.937	115.057	186.878	94.4073	225.676	153.233	138.871	189.013	226.094	169.267	164.831	200.328	125.027	120.977	146.519	108.792	159.845	245.052	240.697	322.367	222.063	161.589
ENSG00000142168	P00441	6647	SOD1	Superoxide dismutase [Cu-Zn] OS=Homo sapiens (Human) OX=9606 GN=SOD1 PE=1 SV=2 source=Uniprot,https://www.uniprot.org/uniprot/P00441	15.9	1365.73	1551.67	1268.76	1580.67	1536.99	1448.59	1645.8	1725.74	1702.61	1691.34	1694.06	1711.32	1428.83	1657.93	1430.25	1526.69	1457.84	1347.29	1560.07	1701.66	1614.19	1869.03	2070.1	2006.49
ENSG00000198805	P00491	4860	PNP	Purine nucleoside phosphorylase OS=Homo sapiens (Human) OX=9606 GN=PNP PE=1 SV=2 source=Uniprot,https://www.uniprot.org/uniprot/P00491	32.1	287.48	308.551	330.203	331.642	359.591	317.512	300.577	285.252	330.577	254.874	259.314	365.234	217.538	209.521	219.784	244.766	264.222	280.409	210.286	214.945	221.723	165.887	178.799	199.666
ENSG00000165704	P00492	3251	HPRT1	Hypoxanthine-guanine phosphoribosyltransferase OS=Homo sapiens (Human) OX=9606 GN=HPRT1 PE=1 SV=2 source=Uniprot,https://www.uniprot.org/uniprot/P00492	24.6	259.201	271.965	274.117	226.478	256.022	209.446	322.253	262.473	311.058	289.282	297.333	323.662	206.343	224.445	207.014	247.914	297.38	246.348	291.937	351.286	327.107	351.49	356.984	344.337
ENSG00000125166	P00505	2806	GOT2	Aspartate aminotransferase, mitochondrial OS=Homo sapiens (Human) OX=9606 GN=GOT2 PE=1 SV=3 source=Uniprot,https://www.uniprot.org/uniprot/P00505	47.5	763.314	829.029	807.65	902.973	877.644	800.586	654.075	586.098	711.963	539.312	565.598	607.708	900.806	986.395	979.642	1227.02	1137.92	1084.01	1330.63	1122.94	1032.77	980.26	1005.88	961.298
ENSG00000097007	P00519	25	ABL1	Tyrosine-protein kinase ABL1 OS=Homo sapiens (Human) OX=9606 GN=ABL1 PE=1 SV=4 source=Uniprot,https://www.uniprot.org/uniprot/P00519	122.8	20.8263	25.8946	25.4197	21.6503	22.9827	20.4399	25.1779	23.2906	22.6288	27.7273	25.5409	24.0128	23.0666	22.1134	21.5704	23.9461	24.0377	20.4086	26.633	25.8267	25.3724	28.639	25.9518	27.0787
ENSG00000146648	P00533	1956	EGFR	Epidermal growth factor receptor OS=Homo sapiens (Human) OX=9606 GN=EGFR PE=1 SV=2 source=Uniprot,https://www.uniprot.org/uniprot/P00533	134.2	23.2901	22.0838	17.0703	12.594	18.0906	19.7789	45.1038	27.9174	39.4697	123.148	108.043	141.428	13.2148	20.2043	19.2812	14.3082	17.925	18.9719	14.4661	17.9964	19.0903	16.705	25.1393	20.9797
ENSG00000102144	P00558	5230	PGK1	Phosphoglycerate kinase 1 OS=Homo sapiens (Human) OX=9606 GN=PGK1 PE=1 SV=3 source=Uniprot,https://www.uniprot.org/uniprot/P00558	44.6	2206.83	2153.63	1721.51	1705.01	1829.16	1917.73	2534.37	3570.61	2251.53	2369.77	2153.37	2596.34	1967.37	1937.98	1889.19	1676.22	1490.52	1510.83	1975.82	2748.26	1981.32	2834.72	2878.39	3355.81
ENSG00000106992	P00568	203	AK1	Adenylate kinase isoenzyme 1 OS=Homo sapiens (Human) OX=9606 GN=AK1 PE=1 SV=3 source=Uniprot,https://www.uniprot.org/uniprot/P00568	21.6	504.257	510.659	437.658	457.169	536.714	500.734	532.605	467.885	484.006	576.119	532.925	537.24	801.24	932.056	919.901	901.927	1025.18	949.062	1076.49	990.484	861.112	1330.79	944.121	1028.9
ENSG00000196839	P00813	100	ADA	Adenosine deaminase OS=Homo sapiens (Human) OX=9606 GN=ADA PE=1 SV=3 source=Uniprot,https://www.uniprot.org/uniprot/P00813	40.7	77.4102	122.712	101.83	79.2148	112.81	73.452	76.6282	58.1589	68.4326	66.4347	80.1306	67.0917	49.801	53.7051	57.1721	63.6854	79.9295	61.9876	57.2841	67.5035	58.7542	41.0677	65.8336	46.5672
ENSG00000198899	P00846	4508	MT-ATP6	ATP synthase subunit a OS=Homo sapiens (Human) OX=9606 GN=MT-ATP6 PE=1 SV=1 source=Uniprot,https://www.uniprot.org/uniprot/P00846	24.8	256.519	315.027	316.881	232.433	328.973	179.792	237.728	218.569	230.229	237.01	233.269	237.923	251.412	331.974	278.697	317.927	431.77	324.748	451.287	325.389	363.415	349.432	261.212	277.902
ENSG00000104267	P00918	760	CA2	Carbonic anhydrase 2 OS=Homo sapiens (Human) OX=9606 GN=CA2 PE=1 SV=2 source=Uniprot,https://www.uniprot.org/uniprot/P00918	29.2	212.384	448.701	326.095	100.238	125.267	147.153	205.651	208.095	166.717	227.904	207.29	265.242	86.3509	143.955	114.142	59.9154	74.353	80.647	63.2332	87.6979	106.486	117.506	153.943	166.208
ENSG00000130707	P00966	445	ASS1	Argininosuccinate synthase OS=Homo sapiens (Human) OX=9606 GN=ASS1 PE=1 SV=2 source=Uniprot,https://www.uniprot.org/uniprot/P00966	46.5	7.48895	6.51402	5.22619	5.54688	4.95952	3.29782	6.66684	5.18792	5.09675	2.6199	6.30966	4.82753	6.13252	11.5269	6.62453	5.44251	5.7939	4.99326	4.80849	5.13753	6.67839	5.95686	6.35105	7.33087
ENSG00000101439	P01034	1471	CST3	Cystatin-C OS=Homo sapiens (Human) OX=9606 GN=CST3 PE=1 SV=1 source=Uniprot,https://www.uniprot.org/uniprot/P01034	15.8	23.9465	33.1249	28.2351	28.831	20.0258	23.8227	34.8216	31.5736	29.4665	38.3624	40.4861	42.2894	31.1284	24.2484	21.7196	26.6214	21.6158	17.2877	24.9527	26.078	20.1988	23.6333	25.4216	20.0974
ENSG00000213281	P01111	4893	NRAS	GTPase NRas OS=Homo sapiens (Human) OX=9606 GN=NRAS PE=1 SV=1 source=Uniprot,https://www.uniprot.org/uniprot/P01111	21.2	48.794	30.8167	58.1002	64.2867	20.0692	122.855	53.0692	121.819	107.905	45.5761	145.845	137.788	39.4942	86.8287	91.844	38.2799	24.4137	73.5944	34.3729	19.5364	52.1319	32.3332	95.8147	87.863
ENSG00000174775	P01112	3265	HRAS	GTPase HRas OS=Homo sapiens (Human) OX=9606 GN=HRAS PE=1 SV=1 source=Uniprot,https://www.uniprot.org/uniprot/P01112	21.3	13.4521	68.0829	37.978	69.831	58.05	72.7481	35.602	56.6075	71.3616	62.3514	57.4683	80.4965	73.1286	68.4018	76.4337	96.8205	57.4582	67.0536	77.8689	69.3833	61.1351	11.9053	65.5216	93.9428
ENSG00000133703	P01116	3845	KRAS	GTPase KRas OS=Homo sapiens (Human) OX=9606 GN=KRAS PE=1 SV=1 source=Uniprot,https://www.uniprot.org/uniprot/P01116	21.6	35.9978	49.3007	21.0181	68.9993	41.431	81.5038	60.5733	81.0215	88.3552	55.2293	84.7539	97.6292	76.6492	105.088	90.2984	73.8271	57.443	79.094	56.6179	50.6732	54.0624	43.1389	81.0688	97.3714
ENSG00000254647	P01308	3630	INS			1893.66	919.785	997.359	1036.56	1592.82	2129.8	2341.11	4008.63	3852.9	4245.73	2870.16	3424.64	3197.68	2182.93	2094.28	1152.31	2826.59	5269.07	1436.56	2066.04	2499.68	1202.39	4591.27	2875.14
ENSG00000137080	P01568	3452	IFNA21			13.3118	30.4475	22.2827	9.21489	11.84	22.832	13.7727	346.828	17.3009	15.4533	13.8377	16.3382	15.8263	9.04471	22.3058	6.97345	8.89408	14.9115	6.60903	8.4158	17.0071	6.29471	11.5068	12.2305
ENSG00000130656	P02008	3050	HBZ	Hemoglobin subunit zeta OS=Homo sapiens (Human) OX=9606 GN=HBZ PE=1 SV=2 source=Uniprot,https://www.uniprot.org/uniprot/P02008	15.6	16.6729	1.89922	2.51286	18.3683	2.21226	3.40847	15.1951	2.12172	4.00784	20.9892	1.82769	5.04112	297.519	1.91404	3.03555	19.7734	1.69354	6.36839	17.3133	2.32428	3.07442	17.0375	2.09273	3.7891
ENSG00000108821	P02452	1277	COL1A1	Collagen alpha-1(I) chain OS=Homo sapiens (Human) OX=9606 GN=COL1A1 PE=1 SV=5 source=Uniprot,https://www.uniprot.org/uniprot/P02452	138.9	3.88738	9.13812	8.00057	6.22262	10.084	7.29059	5.887	6.88296	7.26915	9.08587	8.50611	7.91729	11.6095	11.925	8.50088	13.5567	13.1205	10.7152	9.57935	8.94194	16.1282	9.32596	10.275	11.6734
ENSG00000168542	P02461	1281	COL3A1	Collagen alpha-1(III) chain OS=Homo sapiens (Human) OX=9606 GN=COL3A1 PE=1 SV=4 source=Uniprot,https://www.uniprot.org/uniprot/P02461	138.5	11.4925	7.30283	11.5887	9.90933	7.35561	8.6774	9.93539	8.50077	12.1812	9.13572	10.4495	8.71071	25.6926	10.2379	8.56123	15.8119	9.07295	21.3517	9.39389	13.2938	49.1364	12.9559	15.8194	21.3785
ENSG00000109846	P02511	1410	CRYAB	Alpha-crystallin B chain OS=Homo sapiens (Human) OX=9606 GN=CRYAB PE=1 SV=2 source=Uniprot,https://www.uniprot.org/uniprot/P02511	20.1	21.6589	26.1046	32.4494	14.3396	31.232	34.1637	72.6688	76.3418	64.412	38.2149	58.0884	70.8314	16.2102	31.5693	28.6888	12.2801	21.0415	23.0533	18.5376	23.5688	31.4409	22.6494	37.7681	26.377
ENSG00000186847	P02533	3861	KRT14	Keratin, type I cytoskeletal 14 OS=Homo sapiens (Human) OX=9606 GN=KRT14 PE=1 SV=4 source=Uniprot,https://www.uniprot.org/uniprot/P02533	51.5	41.8872	10.3454	11.0694	45.7071	15.9758	18.7702	12.5479	17.6651	31.9692	31.972	14.2788	5.99949	21.5617	18.9644	12.2646	9.47419	14.2931	24.7166	7.90677	19.1727	13.1526	9.37788	12.4875	9.99158
ENSG00000160789	P02545	4000	LMNA	Prelamin-A/C OS=Homo sapiens (Human) OX=9606 GN=LMNA PE=1 SV=1 source=Uniprot,https://www.uniprot.org/uniprot/P02545	74.1	114.271	143.768	128.123	119.197	128.144	185.428	200.743	273.307	217.028	188.379	401.386	266.319	163.902	141.139	139.778	117.117	124.271	202.559	162.951	181.606	267.464	466.74	1016.82	505.26
ENSG00000130203	P02649	348	APOE	Apolipoprotein E OS=Homo sapiens (Human) OX=9606 GN=APOE PE=1 SV=1 source=Uniprot,https://www.uniprot.org/uniprot/P02649	36.1	49.7281	62.4155	52.5841	42.0713	42.787	41.0401	49.6387	42.4152	42.4645	49.8122	54.9107	53.0442	44.2587	34.4331	38.4222	37.7685	41.1762	39.3033	41.1795	41.4672	46.7863	56.806	57.3532	48.2757
ENSG00000110245	P02656	345	APOC3	Apolipoprotein C-III OS=Homo sapiens (Human) OX=9606 GN=APOC3 PE=1 SV=1 source=Uniprot,https://www.uniprot.org/uniprot/P02656	10.8	66.895	19.3576	29.3037	28.6608	64.4376	44.7712	59.5842	60.17	60.7221	108.963	49.7599	46.4026	116.553	51.1372	32.4563	52.8173	75.6055	85.0929	30.6944	34.1689	46.0365	38.8655	79.8495	55.0868
ENSG00000171564	P02675	2244	FGB	Fibrinogen beta chain OS=Homo sapiens (Human) OX=9606 GN=FGB PE=1 SV=2 source=Uniprot,https://www.uniprot.org/uniprot/P02675	55.9	4.70189	6.04333	12.6337	5.68468	6.19995	11.8641	5.55261	7.92385	8.54983	12.0393	9.88222	8.34291	8.26542	7.95939	7.44527	6.44284	6.59132	18.1659	6.389	6.25513	10.5674	6.66804	9.69641	11.3751
ENSG00000118271	P02766	7276	TTR	Transthyretin OS=Homo sapiens (Human) OX=9606 GN=TTR PE=1 SV=1 source=Uniprot,https://www.uniprot.org/uniprot/P02766	15.9	96.4189	268.702	377.505	45.4603	83.7222	86.6534	52.4109	80.7814	56.4293	34.1651	74.8723	31.0328	38.7117	80.6925	61.4697	28.4242	76.04	28.6378	29.5624	77.7451	55.4337	42.1272	71.0849	22.5784
ENSG00000072274	P02786	7037	TFRC	Transferrin receptor protein 1 OS=Homo sapiens (Human) OX=9606 GN=TFRC PE=1 SV=2 source=Uniprot,https://www.uniprot.org/uniprot/P02786	84.8	149.891	196.325	160.049	126.136	139.654	102.875	137.09	162.06	144.264	162.566	143.767	158.316	120.809	135.881	127.557	120.841	113.775	98.5915	98.3103	135.811	123.503	114.562	110.549	127.629
ENSG00000091513	P02787	7018	TF	Serotransferrin OS=Homo sapiens (Human) OX=9606 GN=TF PE=1 SV=3 source=Uniprot,https://www.uniprot.org/uniprot/P02787	77	1178.47	425.885	517.894	487.898	819.792	1945.88	1097.57	2275.91	1684.7	1724.16	1227.16	1412.91	1600.45	859.747	1029.63	499.245	1527.32	3969.79	821.414	1069.07	1459.13	620.432	1610.08	1400.24
ENSG00000110169	P02790	3263	HPX	Hemopexin OS=Homo sapiens (Human) OX=9606 GN=HPX PE=1 SV=2 source=Uniprot,https://www.uniprot.org/uniprot/P02790	51.6	227.295	114.92	115.689	137.924	161.622	302.012	259.418	413.825	375.155	366.873	261.582	291.819	340.401	235.494	271.49	139.262	294.085	601.441	189.811	208.355	279.044	155.863	325.694	287.139
ENSG00000087086	P02792	2512	FTL	Ferritin light chain OS=Homo sapiens (Human) OX=9606 GN=FTL PE=1 SV=2 source=Uniprot,https://www.uniprot.org/uniprot/P02792	20	314.678	215.338	280.793	416.468	379.112	455.154	506.255	609.799	486.871	607.213	580.371	545.908	296.329	229.05	336.174	281.408	254.563	364.44	551.658	556.133	491.643	737.75	796.885	725.026
ENSG00000167996	P02794	2495	FTH1	Ferritin heavy chain OS=Homo sapiens (Human) OX=9606 GN=FTH1 PE=1 SV=2 source=Uniprot,https://www.uniprot.org/uniprot/P02794	21.2	373.662	283.598	400.289	475.924	455.505	563.136	598.105	656.339	585.144	676.254	723.923	689.116	495.19	362.897	492.46	579.422	577.921	659.307	953.257	907.501	777.451	974.096	1114.35	976.525
ENSG00000198886	P03905	4538	MT-ND4	NADH-ubiquinone oxidoreductase chain 4 OS=Homo sapiens (Human) OX=9606 GN=MT-ND4 PE=1 SV=1 source=Uniprot,https://www.uniprot.org/uniprot/P03905	51.5	16.1702	24.5061	26.2779	8.93146	23.8476	11.3233	21.6968	10.5782	16.1833	17.8219	15.4967	16.2107	10.2455	17.686	16.7908	14.3251	39.4239	19.2382	23.1713	26.3659	34.4394	29.0387	19.2117	20.9069
ENSG00000198786	P03915	4540	MT-ND5	NADH-ubiquinone oxidoreductase chain 5 OS=Homo sapiens (Human) OX=9606 GN=MT-ND5 PE=1 SV=2 source=Uniprot,https://www.uniprot.org/uniprot/P03915	67	19.4327	32.7802	32.0307	26.0441	37.6658	9.71781	25.1143	18.066	14.6395	21.5947	18.6477	13.4369	24.9296	21.413	12.1483	30.6887	40.1992	17.2112	24.2376	32.1276	28.0123	21.0237	19.755	13.9375
ENSG00000228253	P03928	4509	MT-ATP8	ATP synthase protein 8 OS=Homo sapiens (Human) OX=9606 GN=MT-ATP8 PE=1 SV=1 source=Uniprot,https://www.uniprot.org/uniprot/P03928	8	81.22	98.0459	150.576	202.55	111.097	193.559	127.16	152.832	182.471	134.077	141.416	166.93	354.392	244.351	168.691	377.084	139.443	245.479	185.945	94.8345	219.445	77.5743	149.903	187.482
ENSG00000113161	P04035	3156	HMGCR	3-hydroxy-3-methylglutaryl-coenzyme A reductase OS=Homo sapiens (Human) OX=9606 GN=HMGCR PE=1 SV=1 source=Uniprot,https://www.uniprot.org/uniprot/P04035	97.4	23.3434	18.8365	27.0473	25.0705	23.3431	24.8795	16.0299	18.2902	17.5709	16.2757	17.9092	14.6645	27.2711	18.0832	20.0114	32.0493	29.7957	19.5735	27.5441	20.108	19.117	12.0532	15.6218	9.03832
ENSG00000121691	P04040	847	CAT	Catalase OS=Homo sapiens (Human) OX=9606 GN=CAT PE=1 SV=3 source=Uniprot,https://www.uniprot.org/uniprot/P04040	59.7	134.98	147.651	142.723	133.494	140.577	133.577	136.932	127.901	137.229	142.934	139.521	132.65	105.105	95.6481	83.1526	103.326	96.891	144.979	103.506	91.2807	108.114	102.968	107.155	105.133
ENSG00000132155	P04049	5894	RAF1	RAF proto-oncogene serine/threonine-protein kinase OS=Homo sapiens (Human) OX=9606 GN=RAF1 PE=1 SV=1 source=Uniprot,https://www.uniprot.org/uniprot/P04049	73	61.2714	55.8392	62.3023	57.4583	51.2513	47.8654	61.4486	59.2095	55.6171	60.3805	63.5117	54.8232	47.9378	52.1024	50.2432	50.1549	46.5579	45.2813	52.7126	49.6083	55.3224	63.6593	52.5558	49.8237
ENSG00000177628	P04062	2629	GBA	Lysosomal acid glucosylceramidase OS=Homo sapiens (Human) OX=9606 GN=GBA PE=1 SV=3 source=Uniprot,https://www.uniprot.org/uniprot/P04062	59.7	122.947	131.48	120.214	105.292	107.96	100.483	147.828	108.923	128.713	123.811	132.148	134.117	142.814	170.589	135.985	154.859	174.731	148.28	232.358	196.557	192.273	245.059	192.955	174.175
ENSG00000179163	P04066	2517	FUCA1	Tissue alpha-L-fucosidase OS=Homo sapiens (Human) OX=9606 GN=FUCA1 PE=1 SV=4 source=Uniprot,https://www.uniprot.org/uniprot/P04066	53.7	83.6123	98.9319	96.4945	106.243	91.2948	97.933	98.5944	108.536	112.554	99.3249	121.489	118.027	149	189.711	157.794	198.202	138.454	149.359	224.472	171.595	178.287	151.407	210.93	191.928
ENSG00000149925	P04075	226	ALDOA	Fructose-bisphosphate aldolase A OS=Homo sapiens (Human) OX=9606 GN=ALDOA PE=1 SV=2 source=Uniprot,https://www.uniprot.org/uniprot/P04075	39.4	1449.72	1559.54	1440.64	1486.92	1457.9	1672.65	1762.53	2310.64	1742.37	1750.51	1542.82	1852.99	1326.25	1293.76	1408.2	1250.65	1015.12	1146.83	1218.58	1677.22	1351.63	1442.78	1732.25	1845.07
ENSG00000160213	P04080	1476	CSTB	Cystatin-B OS=Homo sapiens (Human) OX=9606 GN=CSTB PE=1 SV=2 source=Uniprot,https://www.uniprot.org/uniprot/P04080	11.1	1074.36	1360.92	1289.22	1172.45	1351.63	984.929	1335.47	1278.28	1255.74	1177.19	1119.13	1236.89	968.245	1054.51	898.168	1069.17	1211.42	1090.86	1187.83	1321.74	1202.96	1345.73	1217.57	1199.17
ENSG00000135046	P04083	301	ANXA1	Annexin A1 OS=Homo sapiens (Human) OX=9606 GN=ANXA1 PE=1 SV=2 source=Uniprot,https://www.uniprot.org/uniprot/P04083	38.7	20.9112	32.9412	26.6038	20.3833	31.863	25.5547	30.7592	31.8833	31.1815	43.37	39.4335	39.5187	41.4984	18.3235	23.7544	17.9002	22.8214	22.8558	22.908	33.631	45.2022	46.6909	32.3681	44.0266
ENSG00000084674	P04114	338	APOB			2.9552	3.06157	2.43221	0.669621	1.89967	0.644144	1.54908	0.866938	0.598044	0.698123	0.716882	0.635429	0.693491	0.651724	0.503101	0.524598	1.016	0.547455	0.628537	1.04894	0.938614	2.75247	0.670303	0.469159
ENSG00000171867	P04156	5621	PRNP	Major prion protein OS=Homo sapiens (Human) OX=9606 GN=PRNP PE=1 SV=1 source=Uniprot,https://www.uniprot.org/uniprot/P04156	27.6	13.7919	26.5469	20.2844	13.2079	11.5143	5.39305	14.8084	15.1958	11.8803	13.9108	13.0928	15.549	19.985	20.8307	12.5692	21.6366	19.6856	16.8333	21.412	17.241	19.5331	19.414	18.101	22.968
ENSG00000112096	P04179	6648	SOD2	Superoxide dismutase [Mn], mitochondrial OS=Homo sapiens (Human) OX=9606 GN=SOD2 PE=1 SV=3 source=Uniprot,https://www.uniprot.org/uniprot/P04179	24.7	251.733	314.234	261.114	310.435	321.646	273.915	326.469	255.757	316.929	251.882	305.019	299.326	391.09	449.234	333.251	356.245	303.107	301.922	320.886	304.172	308.649	299.78	377.162	285.845
ENSG00000065154	P04181	4942	OAT	Ornithine aminotransferase, mitochondrial OS=Homo sapiens (Human) OX=9606 GN=OAT PE=1 SV=1 source=Uniprot,https://www.uniprot.org/uniprot/P04181	48.5	265.147	235.625	280.166	317.906	324.592	309.49	317.698	414.769	376.457	294.881	355.423	344.309	334.278	324.139	309.544	334.021	317.136	270.731	342.729	349.72	324.944	302.704	441.805	398.049
ENSG00000167900	P04183	7083	TK1	Thymidine kinase, cytosolic OS=Homo sapiens (Human) OX=9606 GN=TK1 PE=1 SV=2 source=Uniprot,https://www.uniprot.org/uniprot/P04183	25.5	81.3013	77.8486	95.9352	78.5117	78.5695	59.8307	69.3589	69.3679	68.9526	77.2811	67.7331	59.3916	30.5793	23.1851	23.2054	33.4926	32.3595	24.7658	30.7713	30.0013	27.5333	34.3064	26.24	26.996
ENSG00000154096	P04216	7070	THY1	Thy-1 membrane glycoprotein OS=Homo sapiens (Human) OX=9606 GN=THY1 PE=1 SV=2 source=Uniprot,https://www.uniprot.org/uniprot/P04216	17.9	172.658	185.204	233.836	170.376	182.903	190.166	181.991	196.586	203.675	201.1	211.274	198.785	212.981	228.421	221.787	202.15	257.9	287.581	290.519	226.321	358.804	237.07	231.137	273.11
ENSG00000167768	P04264	3848	KRT1	Keratin, type II cytoskeletal 1 OS=Homo sapiens (Human) OX=9606 GN=KRT1 PE=1 SV=6 source=Uniprot,https://www.uniprot.org/uniprot/P04264	66	798.558	437.62	292.473	1350.19	294.911	308.389	290.763	566.703	1032.87	436.29	575.453	236.953	695.416	532.885	401.737	284.696	323.093	613.807	197.679	417.973	418.096	245.457	488.972	338.346
ENSG00000160307	P04271	6285	S100B	Protein S100-B OS=Homo sapiens (Human) OX=9606 GN=S100B PE=1 SV=2 source=Uniprot,https://www.uniprot.org/uniprot/P04271	10.7	116.478	79.7816	49.3571	69.6996	25.5006	90.0059	100.599	63.5615	100.438	129.091	191.805	317.268	100.206	28.6199	81.5966	85.3289	30.1976	68.8726	73.0755	37.0952	60.8141	79.0954	58.3801	104.02
ENSG00000111640	P04406	2597	GAPDH	Glyceraldehyde-3-phosphate dehydrogenase OS=Homo sapiens (Human) OX=9606 GN=GAPDH PE=1 SV=3 source=Uniprot,https://www.uniprot.org/uniprot/P04406	36	7491.3	7170.08	7289.79	6869.52	6825.46	6802.06	7742.14	8234.17	7807.4	8008.14	7007.38	7958.99	6067.37	6754.95	6806.57	5650.75	5396.76	5965.49	5901.67	6819.25	6566.83	7403.44	7107.03	7745.59
ENSG00000126522	P04424	435	ASL	Argininosuccinate lyase OS=Homo sapiens (Human) OX=9606 GN=ASL PE=1 SV=4 source=Uniprot,https://www.uniprot.org/uniprot/P04424	51.6	32.9286	31.6746	30.0922	30.6258	33.6195	27.204	31.2245	32.5408	29.0531	30.6886	27.1995	28.2638	26.6416	28.4343	26.2651	22.9527	26.522	24.4498	22.8713	23.0752	25.3196	25.559	24.6665	22.8367
ENSG00000206503	P04439	3105	HLA-A	HLA class I histocompatibility antigen, A alpha chain OS=Homo sapiens (Human) OX=9606 GN=HLA-A PE=1 SV=2 source=Uniprot,https://www.uniprot.org/uniprot/P04439	40.8	85.9349	89.2214	81.1455	65.6131	68.9335	76.3579	90.2664	97.2242	94.2334	89.6241	95.8219	99.2765	62.1261	75.466	72.4606	70.8452	68.3354	74.4106	66.0708	72.2144	73.9394	83.2708	83.6138	83.8016
ENSG00000141736	P04626	2064	ERBB2	Receptor tyrosine-protein kinase erbB-2 OS=Homo sapiens (Human) OX=9606 GN=ERBB2 PE=1 SV=1 source=Uniprot,https://www.uniprot.org/uniprot/P04626	137.8	5.95789	9.13438	4.86271	7.03609	5.29912	7.99549	5.41404	4.27395	6.89899	4.40168	6.19183	6.45286	3.2867	1.74394	3.92373	4.09461	2.46119	3.04625	3.33005	2.55972	2.38374	2.89738	2.76289	3.61115
ENSG00000126247	P04632	826	CAPNS1	Calpain small subunit 1 OS=Homo sapiens (Human) OX=9606 GN=CAPNS1 PE=1 SV=1 source=Uniprot,https://www.uniprot.org/uniprot/P04632	28.3	315.403	392.042	314.045	389.529	356.014	385.648	392.881	386.446	409.365	413.175	459.633	463.777	273.914	305.986	340.182	310.641	311.631	309.538	302.826	298.537	326.526	336.516	414.621	399.587
ENSG00000106211	P04792	3315	HSPB1	Heat shock protein beta-1 OS=Homo sapiens (Human) OX=9606 GN=HSPB1 PE=1 SV=2 source=Uniprot,https://www.uniprot.org/uniprot/P04792	22.8	363.414	625.896	509.044	992.55	1269.87	1180.89	800.973	1190.84	974.234	1010.37	895.299	1002.54	227.232	246.497	272.805	248.184	303.936	282.93	234.93	338.105	289.465	279.542	569.061	343.522
ENSG00000176890	P04818	7298	TYMS	Thymidylate synthase OS=Homo sapiens (Human) OX=9606 GN=TYMS PE=1 SV=3 source=Uniprot,https://www.uniprot.org/uniprot/P04818	35.7	226.071	246.368	257.351	165.444	163.87	177.303	211.28	148.582	181.098	192.525	212.392	187.433	86.0771	71.702	126.745	77.2689	62.5072	104.157	67.997	67.2395	89.1067	65.2194	74.4501	92.9195
ENSG00000163902	P04843	6184	RPN1	Dolichyl-diphosphooligosaccharide--protein glycosyltransferase subunit 1 OS=Homo sapiens (Human) OX=9606 GN=RPN1 PE=1 SV=1 source=Uniprot,https://www.uniprot.org/uniprot/P04843	68.5	536.071	661.789	626.497	561.352	609.031	634.147	558.434	521.734	528.104	470.139	577.44	555.925	593.747	534.953	581.032	627.256	610.732	579.449	519.276	581.256	558.763	497.503	536.102	527.211
ENSG00000118705	P04844	6185	RPN2	Dolichyl-diphosphooligosaccharide--protein glycosyltransferase subunit 2 OS=Homo sapiens (Human) OX=9606 GN=RPN2 PE=1 SV=3 source=Uniprot,https://www.uniprot.org/uniprot/P04844	69.2	344.091	338.113	371.205	281.336	309.901	288.026	302.442	280.386	284.145	260.163	296.796	276.257	303.435	272.417	265.227	304.441	290.74	286.229	234.66	257.96	279.08	293.975	248.554	238.975
ENSG00000114353	P04899	2771	GNAI2	Guanine nucleotide-binding protein G(i) subunit alpha-2 OS=Homo sapiens (Human) OX=9606 GN=GNAI2 PE=1 SV=3 source=Uniprot,https://www.uniprot.org/uniprot/P04899	40.4	405.337	413.585	443.745	442.012	411.582	369.355	373.114	372.675	351.705	313.775	381.374	372.686	264.846	334.236	312.195	244.876	240.813	256.919	237.462	230.513	256.389	291.821	310.499	309.521
ENSG00000163399	P05023	476	ATP1A1	Sodium/potassium-transporting ATPase subunit alpha-1 OS=Homo sapiens (Human) OX=9606 GN=ATP1A1 PE=1 SV=1 source=Uniprot,https://www.uniprot.org/uniprot/P05023	112.8	196.749	263.105	216.478	166.391	172.958	147.093	191.989	134.528	159.829	127.984	128.766	163.574	128.125	112.066	105.423	120.625	123.724	103.518	137.523	126.031	126.995	156.278	134.425	132.936
ENSG00000143153	P05026	481	ATP1B1	Sodium/potassium-transporting ATPase subunit beta-1 OS=Homo sapiens (Human) OX=9606 GN=ATP1B1 PE=1 SV=1 source=Uniprot,https://www.uniprot.org/uniprot/P05026	35	122.006	149.549	142.742	116.408	132.129	95.6986	176.494	125.886	134.549	113.331	145.089	122.291	236.639	252.809	157.834	178.762	207.572	142.724	172.977	189.012	182.959	179.37	168.786	184.063
ENSG00000142192	P05067	351	APP	Amyloid-beta precursor protein OS=Homo sapiens (Human) OX=9606 GN=APP PE=1 SV=3 source=Uniprot,https://www.uniprot.org/uniprot/P05067	86.9	52.2073	60.4182	43.2572	44.5289	42.8914	54.9262	50.525	61.2917	65.2765	58.7257	57.9417	67.6591	77.2344	88.3923	94.6123	75.6263	75.3595	73.6907	79.3935	72.6381	86.3671	72.9136	75.2953	78.4602
ENSG00000111275	P05091	217	ALDH2	Aldehyde dehydrogenase, mitochondrial OS=Homo sapiens (Human) OX=9606 GN=ALDH2 PE=1 SV=2 source=Uniprot,https://www.uniprot.org/uniprot/P05091	56.3	420.477	475.508	451.654	460.672	484.431	390.525	394.036	362.375	403.49	364.172	359.362	345.019	500.564	516.431	493.744	707.514	727.018	575.581	736.873	693.808	719.014	705.278	595.506	541.91
ENSG00000205581	P05114	3150	HMGN1	Non-histone chromosomal protein HMG-14 OS=Homo sapiens (Human) OX=9606 GN=HMGN1 PE=1 SV=3 source=Uniprot,https://www.uniprot.org/uniprot/P05114	10.7	2443.38	2790.17	2202.98	2127.99	2453.48	1821.64	2596.34	1874.33	2138.65	1957.1	2037.24	1953.82	1985.22	1856.19	1801.84	1793.86	1817.36	1516.47	1861.56	2349.69	2041.71	2803.32	2323.81	2257.14
ENSG00000005022	P05141	292	SLC25A5	ADP/ATP translocase 2 OS=Homo sapiens (Human) OX=9606 GN=SLC25A5 PE=1 SV=7 source=Uniprot,https://www.uniprot.org/uniprot/P05141	32.8	251.003	269.963	248.809	478.062	381.449	504.522	328.054	369.479	421.72	400.578	446.66	449.107	403.184	338.846	450.474	711.928	505.885	562.574	565.549	427.129	413.086	338.195	461.263	472.543
ENSG00000187608	P05161	9636	ISG15	Ubiquitin-like protein ISG15 OS=Homo sapiens (Human) OX=9606 GN=ISG15 PE=1 SV=5 source=Uniprot,https://www.uniprot.org/uniprot/P05161	17.9	55.4592	55.8348	82.5761	69.1465	67.6853	37.1983	72.0466	66.9747	58.1478	83.0327	85.3311	61.8934	53.1731	35.9031	22.6573	52.9048	47.6949	29.4705	51.2662	49.9463	53.0331	53.7566	58.3443	34.8745
ENSG00000175198	P05165	5095	PCCA	Propionyl-CoA carboxylase alpha chain, mitochondrial OS=Homo sapiens (Human) OX=9606 GN=PCCA PE=1 SV=4 source=Uniprot,https://www.uniprot.org/uniprot/P05165	80	127.169	111.802	102.422	121.089	119.347	124.879	104.123	90.2989	106.058	81.033	105.527	106.459	120.28	128.986	131.682	108.059	105.038	100.939	96.2202	83.0884	82.0112	88.8133	104.981	86.7855
ENSG00000114054	P05166	5096	PCCB	Propionyl-CoA carboxylase beta chain, mitochondrial OS=Homo sapiens (Human) OX=9606 GN=PCCB PE=1 SV=3 source=Uniprot,https://www.uniprot.org/uniprot/P05166	58.2	112.847	120.736	103.946	87.4502	111.321	74.3785	89.9666	61.3282	70.3409	65.7452	65.3195	75.4207	85.5902	92.2755	76.4345	72.9136	76.6813	62.3217	68.4579	63.87	65.2647	76.3588	68.3569	63.3598
ENSG00000134001	P05198	1965	EIF2S1	Eukaryotic translation initiation factor 2 subunit 1 OS=Homo sapiens (Human) OX=9606 GN=EIF2S1 PE=1 SV=3 source=Uniprot,https://www.uniprot.org/uniprot/P05198	36.1	429.924	421.186	398.034	418.649	390.055	420.98	458.831	432.639	434.922	452.997	436.075	456.109	387.939	393.119	430.073	409.611	398.331	438.386	464.199	430.56	429.45	455.446	405.581	428.172
ENSG00000198830	P05204	3151	HMGN2	Non-histone chromosomal protein HMG-17 OS=Homo sapiens (Human) OX=9606 GN=HMGN2 PE=1 SV=3 source=Uniprot,https://www.uniprot.org/uniprot/P05204	9.4	2876.99	2925.31	3179.22	3553.99	2933.47	3951.28	4096.86	3279.09	3434.03	4323.34	4824.9	3747.07	2170.81	2048.55	2548.01	2161.53	1881.65	1960.07	2066.56	2418.66	2354.36	2833.68	2995.33	3022.72
ENSG00000137818	P05386	6176	RPLP1	60S acidic ribosomal protein P1 OS=Homo sapiens (Human) OX=9606 GN=RPLP1 PE=1 SV=1 source=Uniprot,https://www.uniprot.org/uniprot/P05386	11.5	215.409	238.747	243.393	190.787	208.641	200.108	176.348	176.867	201.409	168.632	193.5	200.278	146.579	194.844	222.547	258.191	196.123	198.765	246.473	222.811	207.307	227.436	163.869	195.181
ENSG00000177600	P05387	6181	RPLP2	60S acidic ribosomal protein P2 OS=Homo sapiens (Human) OX=9606 GN=RPLP2 PE=1 SV=1 source=Uniprot,https://www.uniprot.org/uniprot/P05387	11.7	2192.06	2701.62	2607.08	2149.84	2198.33	2114.25	2001.36	2026.92	2139.59	1932.56	2043.15	2057.48	2102.18	2113.11	2203.35	2125	2286.72	2099.15	2184.77	2141.69	2121.8	1844.89	1904.29	1865.42
ENSG00000089157	P05388	6175	RPLP0	60S acidic ribosomal protein P0 OS=Homo sapiens (Human) OX=9606 GN=RPLP0 PE=1 SV=1 source=Uniprot,https://www.uniprot.org/uniprot/P05388	34.3	1209.64	1052.3	995.975	955.802	946.058	1156.5	1022.56	923.272	1035.9	960.837	979.082	1077.87	908.712	975.172	1192.04	933.882	904.417	1004.19	1040.05	903.057	931.799	1033.2	857.252	926.527
ENSG00000177606	P05412	3725	JUN	Transcription factor AP-1 OS=Homo sapiens (Human) OX=9606 GN=JUN PE=1 SV=2 source=Uniprot,https://www.uniprot.org/uniprot/P05412	35.7	27.8743	15.0274	23.3543	27.6018	26.1467	21.5577	27.9875	29.1563	24.2289	28.4427	16.7875	22.2587	26.0678	28.5189	23.7311	29.9116	48.4351	32.6426	31.803	38.8386	36.9556	36.1847	37.7959	35.7126
ENSG00000121769	P05413	2170	FABP3	Fatty acid-binding protein, heart OS=Homo sapiens (Human) OX=9606 GN=FABP3 PE=1 SV=4 source=Uniprot,https://www.uniprot.org/uniprot/P05413	14.8	162.488	108.243	103.007	135.311	130.624	136.09	99.3882	88.1044	107.613	87.6902	82.1778	82.2396	571.254	198.451	285.335	636.834	885.297	538.906	511.283	284.141	227.202	226.121	200.351	175.659
ENSG00000168495	P05423	661	POLR3D	DNA-directed RNA polymerase III subunit RPC4 OS=Homo sapiens (Human) OX=9606 GN=POLR3D PE=1 SV=2 source=Uniprot,https://www.uniprot.org/uniprot/P05423	44.4	41.2858	37.3717	42.9123	37.9271	37.1509	28.2484	35.2571	36.8699	35.7643	34.7276	35.0307	33.5413	29.748	25.3437	28.0436	30.6914	34.0917	32.2806	45.6939	39.7766	42.1678	41.7219	34.9636	39.0884
ENSG00000138385	P05455	6741	SSB	Lupus La protein OS=Homo sapiens (Human) OX=9606 GN=SSB PE=1 SV=2 source=Uniprot,https://www.uniprot.org/uniprot/P05455	46.8	1215.08	1266.99	1325.66	1353.03	1298.3	1119.06	1181.15	1213.9	1092.76	992.162	1004.76	1042.03	1074.22	1043.81	996.324	1307.09	1072.84	1071.33	1161.9	1147.38	1107.77	1185.7	994.085	1013.42
ENSG00000150093	P05556	3688	ITGB1	Integrin beta-1 OS=Homo sapiens (Human) OX=9606 GN=ITGB1 PE=1 SV=2 source=Uniprot,https://www.uniprot.org/uniprot/P05556	88.4	158.172	207.261	192.654	221.618	200.412	179.017	191.534	218.987	201.804	203.792	225.428	222.088	116.623	68.1789	86.947	99.3448	75.2905	79.9085	85.5378	97.4182	106.127	112.525	144.298	128.144
ENSG00000166501	P05771	5579	PRKCB	Protein kinase C beta type OS=Homo sapiens (Human) OX=9606 GN=PRKCB PE=1 SV=4 source=Uniprot,https://www.uniprot.org/uniprot/P05771	76.8	19.979	12.7696	25.5918	19.5039	14.246	13.0595	6.29098	8.65846	7.0137	5.30043	6.60115	4.85793	11.7693	10.9481	8.49644	9.09816	10.0586	6.60981	7.59538	10.3316	5.24799	5.55002	8.50643	4.95309
ENSG00000111057	P05783	3875	KRT18	Keratin, type I cytoskeletal 18 OS=Homo sapiens (Human) OX=9606 GN=KRT18 PE=1 SV=2 source=Uniprot,https://www.uniprot.org/uniprot/P05783	48	112.823	69.7291	43.763	12.0281	22.3998	10.7576	25.1771	19.0037	18.3234	12.4951	11.7259	11.5084	22.1854	10.6772	8.16157	9.59314	9.22308	8.51935	11.3831	10.3419	15.5065	25.4132	16.1968	9.31038
ENSG00000170421	P05787	3856	KRT8	Keratin, type II cytoskeletal 8 OS=Homo sapiens (Human) OX=9606 GN=KRT8 PE=1 SV=7 source=Uniprot,https://www.uniprot.org/uniprot/P05787	53.7	41.8038	27.4876	13.1628	6.69031	9.2211	11.5025	17.4951	9.28405	16.6447	7.85661	4.03466	6.1767	32.6026	5.90049	4.68113	4.80164	4.18006	4.78804	8.6389	4.40323	6.66167	11.8016	8.99006	7.53528
ENSG00000104327	P05937	793	CALB1	Calbindin OS=Homo sapiens (Human) OX=9606 GN=CALB1 PE=1 SV=2 source=Uniprot,https://www.uniprot.org/uniprot/P05937	30	882.747	454.154	115.942	111.396	55.885	124.063	175.151	60.6661	114.957	50.8051	58.6411	128.956	89.9926	131.526	187.716	51.8735	54.8089	45.7072	54.7266	52.4164	48.9814	57.8165	57.4434	68.2345
ENSG00000126088	P06132	7389	UROD	Uroporphyrinogen decarboxylase OS=Homo sapiens (Human) OX=9606 GN=UROD PE=1 SV=2 source=Uniprot,https://www.uniprot.org/uniprot/P06132	40.8	382.427	402.219	386.134	283.603	389.242	277.543	347.438	315.176	304.417	321.582	273.426	293.026	226.623	219.252	225.206	237.599	276.533	258.665	327.695	296.326	291.151	324.378	253.413	245.383
ENSG00000010810	P06241	2534	FYN	Tyrosine-protein kinase Fyn OS=Homo sapiens (Human) OX=9606 GN=FYN PE=1 SV=3 source=Uniprot,https://www.uniprot.org/uniprot/P06241	60.7	26.5339	35.9354	32.5963	40.3691	45.6198	35.2812	38.4448	36.1855	37.7261	47.5337	36.8514	39.2355	28.1369	31.6834	36.6076	24.0295	26.1927	30.1541	33.7657	46.8271	45.3426	55.0929	47.5343	56.6196
ENSG00000114200	P06276	590	BCHE	Cholinesterase OS=Homo sapiens (Human) OX=9606 GN=BCHE PE=1 SV=1 source=Uniprot,https://www.uniprot.org/uniprot/P06276	68.4	3.46203	2.84901	2.07047	3.40091	2.91169	3.09488	7.79817	2.68074	6.85802	5.67317	7.88518	11.5815	2.6246	1.24883	3.04323	2.28935	1.50525	1.50915	1.75747	1.67369	1.8846	2.34602	2.33156	1.99836
ENSG00000102393	P06280	2717	GLA	Alpha-galactosidase A OS=Homo sapiens (Human) OX=9606 GN=GLA PE=1 SV=1 source=Uniprot,https://www.uniprot.org/uniprot/P06280	48.7	28.8002	22.2063	23.5325	27.2235	25.4951	26.1409	20.3633	15.7466	20.7265	13.7412	20.5566	19.6042	21.0267	17.6921	16.2382	21.7953	21.3527	22.2775	14.8246	14.6117	16.988	10.4517	14.5656	12.3454
ENSG00000148180	P06396	2934	GSN	Gelsolin OS=Homo sapiens (Human) OX=9606 GN=GSN PE=1 SV=1 source=Uniprot,https://www.uniprot.org/uniprot/P06396	85.6	15.3086	27.2955	21.2791	15.9612	19.5713	14.0326	19.458	20.3194	15.3878	12.5347	24.3011	13.2224	13.65	13.0065	11.2477	10.4605	16.2079	13.0779	12.9142	15.3282	18.4163	23.5654	34.9759	17.9249
ENSG00000139687	P06400	5925	RB1	Retinoblastoma-associated protein OS=Homo sapiens (Human) OX=9606 GN=RB1 PE=1 SV=2 source=Uniprot,https://www.uniprot.org/uniprot/P06400	106.1	163.362	159.385	173.911	141.94	169.455	141.551	141.334	127.791	141.132	173.237	149.226	147.103	62.8266	55.3426	73.3971	64.2359	60.678	67.6464	62.1683	65.4103	64.4372	67.5309	60.9346	62.2923
ENSG00000187514	P06454	5757	PTMA	Prothymosin alpha OS=Homo sapiens (Human) OX=9606 GN=PTMA PE=1 SV=2 source=Uniprot,https://www.uniprot.org/uniprot/P06454	12.2	12999.5	12126.9	13562.5	11502.1	11446.1	11350.8	11354.7	10673	11275.3	11138.5	11584.1	11764.8	12663.9	11743.3	12591.6	11374.8	10172.2	9809.02	10753.2	13307.8	12202.8	14453.9	12996.2	14565
ENSG00000170312	P06493	983	CDK1	Cyclin-dependent kinase 1 OS=Homo sapiens (Human) OX=9606 GN=CDK1 PE=1 SV=3 source=Uniprot,https://www.uniprot.org/uniprot/P06493	34.1	307.604	306.214	355.883	269.991	295.948	300.135	281.813	253.226	327.784	312.087	290.614	304.819	97.6108	93.0359	112.01	100.055	95.2968	109.697	102.023	99.5933	84.5402	85.2675	98.4252	77.365
ENSG00000110955	P06576	506	ATP5F1B	ATP synthase subunit beta, mitochondrial OS=Homo sapiens (Human) OX=9606 GN=ATP5F1B PE=1 SV=3 source=Uniprot,https://www.uniprot.org/uniprot/P06576	56.5	1105.45	1247.62	1232.98	1308.23	1278.27	1239.7	1148.78	1035.43	1182.09	1122.15	1136.59	1156.86	1463.97	1447.13	1424.27	1744.47	1814.14	1697.39	1795.72	1574.41	1592.06	1394.82	1401.42	1372.61
ENSG00000151247	P06730	1977	EIF4E	Eukaryotic translation initiation factor 4E OS=Homo sapiens (Human) OX=9606 GN=EIF4E PE=1 SV=2 source=Uniprot,https://www.uniprot.org/uniprot/P06730	25.1	611.645	591.818	597.079	614.08	619.563	594.767	556.652	571.392	600.635	624.693	577.532	613.495	559.162	636.137	644.148	718.775	687.232	655.991	790.311	739.333	658.781	712.138	649.209	694.03
ENSG00000074800	P06733	2023	ENO1	Alpha-enolase OS=Homo sapiens (Human) OX=9606 GN=ENO1 PE=1 SV=2 source=Uniprot,https://www.uniprot.org/uniprot/P06733	47.1	4712.89	3930.47	3500.95	3943.18	3526.15	4561.75	4742.36	6737.69	4665.75	3871.98	4085.23	5845.31	3197.72	3244.31	3396.6	2685.88	2187.93	2687.71	2612.29	3276.22	2696.82	2809.02	3568.99	4151.99
ENSG00000100504	P06737	5836	PYGL	Glycogen phosphorylase, liver form OS=Homo sapiens (Human) OX=9606 GN=PYGL PE=1 SV=4 source=Uniprot,https://www.uniprot.org/uniprot/P06737	97.1	86.0044	81.8467	71.6012	79.8465	88.7238	80.6351	248.873	100.528	176.743	125.828	128.132	292.574	58.3133	62.6669	62.8771	59.8086	57.7614	59.7096	56.9282	63.8515	61.0817	67.5473	78.5037	72.1841
ENSG00000105220	P06744	2821	GPI	Glucose-6-phosphate isomerase OS=Homo sapiens (Human) OX=9606 GN=GPI PE=1 SV=4 source=Uniprot,https://www.uniprot.org/uniprot/P06744	63.1	1198.11	1068.23	955.474	940.909	926.855	991.702	1132.89	1435.06	1078.13	1034.43	978.056	1189.96	989.189	1052.4	1013.24	937.745	848.767	873.528	1003.45	1083.95	903.149	1006.71	1094.89	1206.4
ENSG00000070501	P06746	5423	POLB	DNA polymerase beta OS=Homo sapiens (Human) OX=9606 GN=POLB PE=1 SV=3 source=Uniprot,https://www.uniprot.org/uniprot/P06746	38.2	113.286	116.787	96.3979	128.813	110.709	139.754	120.926	133.684	144.172	117.628	141.432	143.863	173.007	214.292	200.4	166.355	140.173	160.897	168.633	149.348	167.21	154.922	170.534	202.707
ENSG00000181163	P06748	4869	NPM1	Nucleophosmin OS=Homo sapiens (Human) OX=9606 GN=NPM1 PE=1 SV=2 source=Uniprot,https://www.uniprot.org/uniprot/P06748	32.6	3406.28	3550.76	3342.78	4138.76	3308.52	4790.57	3206.49	3571.6	3568.45	2878.79	3081.54	3450.17	3696.44	3940.32	4228.39	3812.65	3095.25	3875	3588	3329.91	3059.43	2884.18	3252.9	3981.73
ENSG00000143549	P06753	7170	TPM3	Tropomyosin alpha-3 chain OS=Homo sapiens (Human) OX=9606 GN=TPM3 PE=1 SV=2 source=Uniprot,https://www.uniprot.org/uniprot/P06753	32.9	328.003	322.276	272.429	226.768	243.668	200.311	270.151	195.483	216.057	193.265	203.55	216.352	260.694	237.169	235.237	223.853	260.904	214.799	258.403	268.651	237.973	293.456	220.223	207.092
ENSG00000138448	P06756	3685	ITGAV	Integrin alpha-V OS=Homo sapiens (Human) OX=9606 GN=ITGAV PE=1 SV=2 source=Uniprot,https://www.uniprot.org/uniprot/P06756	116	47.5858	55.2362	52.029	52.8336	64.2853	44.6502	56.1517	65.7067	61.8798	71.0387	61.1471	65.3651	32.5576	26.5252	27.5443	33.8634	36.4473	37.104	31.4768	37.0113	40.4603	40.067	40.0048	41.7073
ENSG00000213614	P06865	3073	HEXA	Beta-hexosaminidase subunit alpha OS=Homo sapiens (Human) OX=9606 GN=HEXA PE=1 SV=2 source=Uniprot,https://www.uniprot.org/uniprot/P06865	60.7	111.421	174.775	119.535	118.513	138.453	123.198	119.319	131.295	125.141	117.57	128.789	126.216	113.587	141.083	117.504	122.011	128.658	111.015	131.411	131.948	120.933	124.122	142.105	131.411
ENSG00000143819	P07099	2052	EPHX1	Epoxide hydrolase 1 OS=Homo sapiens (Human) OX=9606 GN=EPHX1 PE=1 SV=1 source=Uniprot,https://www.uniprot.org/uniprot/P07099	52.9	108.731	162.847	163.12	110.93	123.881	119.066	169.013	161.686	139.934	182.268	193.49	161.849	119.184	103.739	121.315	134.731	129.518	122.74	151.98	164.224	168.498	244.003	236.771	168.461
ENSG00000155368	P07108	1622	DBI	Acyl-CoA-binding protein OS=Homo sapiens (Human) OX=9606 GN=DBI PE=1 SV=2 source=Uniprot,https://www.uniprot.org/uniprot/P07108	10	1885.68	1962.95	2112.58	4264.07	3308.5	3845.34	4450.92	4608.62	4596.76	5782.04	6052.25	6621.96	2685.79	2142.92	2774.19	3456.72	2229.38	2574.43	2416.44	2531.61	2795.42	2322.29	2669.36	3113.04
ENSG00000111716	P07195	3945	LDHB	L-lactate dehydrogenase B chain OS=Homo sapiens (Human) OX=9606 GN=LDHB PE=1 SV=2 source=Uniprot,https://www.uniprot.org/uniprot/P07195	36.6	2325.69	2523.72	2510.83	2554.49	2386.15	2278.97	2038.95	2166.49	2153.64	2141.51	2162.37	2178.46	1891.16	2022.81	2127.45	2384.83	2086.02	1984.37	2133.69	2009.08	1858.58	1783.66	1765.68	1933.78
ENSG00000277586	P07196	4747	NEFL	Neurofilament light polypeptide OS=Homo sapiens (Human) OX=9606 GN=NEFL PE=1 SV=3 source=Uniprot,https://www.uniprot.org/uniprot/P07196	61.5	64.2753	51.2038	40.5164	68.4874	48.7147	46.2407	61.8471	51.5775	48.8662	64.0655	58.011	49.9607	155.047	90.5852	100.883	77.7597	56.1772	63.814	103.068	101.647	80.4615	96.0832	117.612	106.552
ENSG00000104722	P07197	4741	NEFM	Neurofilament medium polypeptide OS=Homo sapiens (Human) OX=9606 GN=NEFM PE=1 SV=3 source=Uniprot,https://www.uniprot.org/uniprot/P07197	102.4	103.187	65.4128	93.6077	112.413	63.7634	98.6628	101.335	80.199	99.6259	106.734	78.588	101.72	411.04	285.897	286.831	173.523	103.932	159.99	297.219	224.529	208.851	224.309	253.537	227.268
ENSG00000125817	P07199	1059	CENPB	Major centromere autoantigen B OS=Homo sapiens (Human) OX=9606 GN=CENPB PE=1 SV=2 source=Uniprot,https://www.uniprot.org/uniprot/P07199	65.1	131.187	111.877	113.958	122.731	149.728	166.735	142.62	129.369	133.685	140.965	152.736	142.703	101.553	85.878	103.524	102.74	90.9394	114.835	106.324	106.95	105.614	111.584	103.995	113.554
ENSG00000233276	P07203	2876	GPX1	Glutathione peroxidase 1 OS=Homo sapiens (Human) OX=9606 GN=GPX1 PE=1 SV=4 source=Uniprot,https://www.uniprot.org/uniprot/P07203	22.1	561.332	676.474	590.004	515.695	590.603	529.052	521.673	471.904	512.127	482.18	477.092	526.091	453.361	514.199	592.443	504.152	589.976	601.394	676.425	638.488	595.442	781.732	599.588	669.466
ENSG00000170950	P07205	5232	PGK2	Phosphoglycerate kinase 2 OS=Homo sapiens (Human) OX=9606 GN=PGK2 PE=1 SV=3 source=Uniprot,https://www.uniprot.org/uniprot/P07205	44.8	37.6449	32.636	26.0066	25.2429	27.8993	28.4153	36.7437	53.5461	34.8418	36.5428	33.2871	41.3911	30.7802	30.2127	26.8519	24.0825	22.3728	21.9729	32.2846	40.5316	31.1046	44.3492	44.4349	50.5063
ENSG00000184500	P07225	5627	PROS1	Vitamin K-dependent protein S OS=Homo sapiens (Human) OX=9606 GN=PROS1 PE=1 SV=1 source=Uniprot,https://www.uniprot.org/uniprot/P07225	75.1	11.3925	13.064	11.8274	9.14824	10.9101	9.06427	14.0144	11.596	12.4385	10.5807	10.276	14.0976	8.93212	7.95919	9.1069	8.12526	9.75913	9.26427	8.19607	12.0984	9.01546	9.78404	9.03971	8.65851
ENSG00000185624	P07237	5034	P4HB	Protein disulfide-isomerase OS=Homo sapiens (Human) OX=9606 GN=P4HB PE=1 SV=3 source=Uniprot,https://www.uniprot.org/uniprot/P07237	57.1	909.061	994.649	1005.01	962.767	882.814	878.813	977.463	1078.17	909.834	917.602	970.708	958.425	825.839	804.699	820.588	813.009	795.53	726.605	761.091	737.731	778.734	779.877	898.973	819.08
ENSG00000189060	P07305	3005	H1-0	Histone H1.0 OS=Homo sapiens (Human) OX=9606 GN=H1-0 PE=1 SV=3 source=Uniprot,https://www.uniprot.org/uniprot/P07305	20.9	2125.33	1362.45	1280.96	1924.75	2168.27	2645.99	2044.1	2766.63	2219.99	2194.08	1512.1	2014.83	2716.88	2436.38	1804.38	2390.45	2628.39	3082.87	3829.33	3382.96	2930.55	3482.34	2899.4	3202.17
ENSG00000119640	P07311	97	ACYP1	Acylphosphatase-1 OS=Homo sapiens (Human) OX=9606 GN=ACYP1 PE=1 SV=2 source=Uniprot,https://www.uniprot.org/uniprot/P07311	11.3	403.639	458.542	453.697	498.843	666.854	455.508	602.09	478.292	528.424	558.604	521.187	509.865	513.461	556.819	555.5	605.922	713.815	554.867	666.737	673.949	613.769	643.336	564.572	598.651
ENSG00000117984	P07339	1509	CTSD	Cathepsin D OS=Homo sapiens (Human) OX=9606 GN=CTSD PE=1 SV=1 source=Uniprot,https://www.uniprot.org/uniprot/P07339	44.5	613.817	733.169	619.421	512.104	523.362	554.615	622.606	522.488	593.324	545.602	631.546	612.741	693.811	833.821	713.567	692.154	703.985	710.531	795.512	728.911	763.236	1094.26	813.998	765.078
ENSG00000182718	P07355	302	ANXA2	Annexin A2 OS=Homo sapiens (Human) OX=9606 GN=ANXA2 PE=1 SV=2 source=Uniprot,https://www.uniprot.org/uniprot/P07355	38.6	206.251	273.332	132.847	101.671	81.5829	144.91	181.351	92.2624	147.685	79.5459	171.369	117.989	188.833	62.8142	66.898	74.3266	60.5397	78.3049	87.4794	70.7426	98.4939	125.706	258.498	120.544
ENSG00000014216	P07384	823	CAPN1	Calpain-1 catalytic subunit OS=Homo sapiens (Human) OX=9606 GN=CAPN1 PE=1 SV=1 source=Uniprot,https://www.uniprot.org/uniprot/P07384	81.8	145.659	186.346	153.366	187.974	165.056	169.372	192.674	186.65	200.415	226.843	210.71	216.535	165.377	147.572	166.405	191.578	189.065	188.125	175.958	167.907	194.103	196.03	192.036	202.257
ENSG00000197746	P07602	5660	PSAP	Prosaposin OS=Homo sapiens (Human) OX=9606 GN=PSAP PE=1 SV=2 source=Uniprot,https://www.uniprot.org/uniprot/P07602	58.1	509.179	653.117	582.525	773.929	657.289	684.029	754.26	760.134	732.344	858.126	846.705	793.668	855.365	1067.47	875.839	988.451	848.985	860.789	1034.5	922.25	932.827	1081.07	1234.26	1132.5
ENSG00000049860	P07686	3074	HEXB	Beta-hexosaminidase subunit beta OS=Homo sapiens (Human) OX=9606 GN=HEXB PE=1 SV=3 source=Uniprot,https://www.uniprot.org/uniprot/P07686	63.1	118.827	175.492	152.581	147.068	143.387	133.443	153.369	154.531	145.013	130.898	153.649	148.234	136.31	182.44	141.797	135.123	139.219	130.618	159.222	144.476	148.42	162.35	210.277	178.368
ENSG00000108518	P07737	5216	PFN1	Profilin-1 OS=Homo sapiens (Human) OX=9606 GN=PFN1 PE=1 SV=2 source=Uniprot,https://www.uniprot.org/uniprot/P07737	15	3247.1	3556.65	3585.89	3421.55	3568.82	3456.17	3408.66	3269.94	3550.5	3596.52	3441.68	3742.58	2383.1	2519.69	2709.66	2857.17	2788.78	2791.54	2825.26	2904.71	2949.58	2976.72	2961.44	3034.35
ENSG00000172331	P07738	669	BPGM	Bisphosphoglycerate mutase OS=Homo sapiens (Human) OX=9606 GN=BPGM PE=1 SV=2 source=Uniprot,https://www.uniprot.org/uniprot/P07738	30	161.355	144.739	111.763	116.871	158.567	123.986	165.966	128.688	149.953	154.372	137.54	155.128	125.116	146.837	152.814	123.601	185.449	158.309	167.669	210.839	170.682	242.436	158.987	170.893
ENSG00000198931	P07741	353	APRT	Adenine phosphoribosyltransferase OS=Homo sapiens (Human) OX=9606 GN=APRT PE=1 SV=2 source=Uniprot,https://www.uniprot.org/uniprot/P07741	19.6	265.489	271.848	269.497	222.923	216.211	189.573	251.748	207.091	233.313	225.912	230.854	241.465	199.085	203.109	168.858	250.603	222.194	197.99	241.826	221.128	257.514	245.7	236.734	220.604
ENSG00000136628	P07814	2058	EPRS1	Bifunctional glutamate/proline--tRNA ligase OS=Homo sapiens (Human) OX=9606 GN=EPRS PE=1 SV=5 source=Uniprot,https://www.uniprot.org/uniprot/P07814	170.5	325.051	365.504	321.253	351.449	314.724	330.823	320.068	322.4	324.42	319.886	328.355	339.294	387.485	373.24	398.523	403.352	350.124	345.664	373.62	315.737	312.542	264.509	282.39	292.096
ENSG00000164733	P07858	1508	CTSB	Cathepsin B OS=Homo sapiens (Human) OX=9606 GN=CTSB PE=1 SV=3 source=Uniprot,https://www.uniprot.org/uniprot/P07858	37.8	231.159	310.955	241.821	240.848	244.103	262.041	317.506	255.705	271.995	289.632	315.448	306.269	269.995	363.803	346.158	285.15	285.509	271.48	365.54	336.731	333.672	467.381	438.054	430.181
ENSG00000080824	P07900	3320	HSP90AA1	Heat shock protein HSP 90-alpha OS=Homo sapiens (Human) OX=9606 GN=HSP90AA1 PE=1 SV=5 source=Uniprot,https://www.uniprot.org/uniprot/P07900	84.6	1891.29	2022.72	1928.94	2073.09	1683.97	2301.93	2104.08	2087.94	2098.08	1954.28	2017.91	2207.08	2239.8	2554.37	2759.2	2331.12	1973.46	2191.2	2117.43	1988.42	2027.24	2127.42	2096.34	2206.87
ENSG00000213930	P07902	2592	GALT	Galactose-1-phosphate uridylyltransferase OS=Homo sapiens (Human) OX=9606 GN=GALT PE=1 SV=3 source=Uniprot,https://www.uniprot.org/uniprot/P07902	43.3	13.5035	29.1999	18.0819	16.5858	27.4229	8.70454	13.4788	14.8689	14.5091	9.11592	6.38734	9.84083	11.3639	13.6308	7.25816	12.2911	16.1215	9.30753	11.8819	10.9187	9.32316	7.99431	8.79403	6.57039
ENSG00000092199	P07910	3183	HNRNPC	Heterogeneous nuclear ribonucleoproteins C1/C2 OS=Homo sapiens (Human) OX=9606 GN=HNRNPC PE=1 SV=4 source=Uniprot,https://www.uniprot.org/uniprot/P07910	33.7	1371.62	1480.76	1499.47	1761.55	1589.28	1570.09	1417.04	1585.8	1564.04	1475.85	1546.98	1538.37	1487.8	1568.1	1481.99	1664.08	1415.85	1556.25	1573.35	1619.77	1617.12	1292.92	1501.26	1629.97
ENSG00000173660	P07919	7388	UQCRH	Cytochrome b-c1 complex subunit 6, mitochondrial OS=Homo sapiens (Human) OX=9606 GN=UQCRH PE=1 SV=2 source=Uniprot,https://www.uniprot.org/uniprot/P07919	10.7	694.408	653.58	886.606	544.733	766.636	578.198	670.425	592.48	616.624	650.858	703.059	616.668	700.361	766.335	637.863	697.616	890.713	786.321	898.181	867.241	956.077	1035.79	891.39	646.398
ENSG00000091136	P07942	3912	LAMB1	Laminin subunit beta-1 OS=Homo sapiens (Human) OX=9606 GN=LAMB1 PE=1 SV=2 source=Uniprot,https://www.uniprot.org/uniprot/P07942	197.9	165.938	220.001	176.196	165.959	171.252	167.121	165.698	156.848	168.214	183.805	194.658	181.397	180.09	168.505	163.058	131.762	176.173	184.255	175.074	140.66	184.462	193.912	190.377	177.859
ENSG00000198467	P07951	7169	TPM2	Tropomyosin beta chain OS=Homo sapiens (Human) OX=9606 GN=TPM2 PE=1 SV=1 source=Uniprot,https://www.uniprot.org/uniprot/P07951	32.8	61.3363	65.5015	64.0832	60.9253	52.2524	54.8522	73.2282	56.8171	67.4673	80.0883	86.2466	74.9584	48.6063	50.6873	51.9132	40.2983	34.3391	36.7884	44.4907	46.6838	53.8146	62.3995	68.3638	64.8543
ENSG00000091483	P07954	2271	FH	Fumarate hydratase, mitochondrial OS=Homo sapiens (Human) OX=9606 GN=FH PE=1 SV=3 source=Uniprot,https://www.uniprot.org/uniprot/P07954	54.6	344.747	353.996	385.678	396.986	368.437	358.007	366.645	291.177	324.231	313.985	326.673	315.706	425.702	355.368	395.052	500.321	453.389	412.341	475.716	395.809	397.027	392.273	350.264	342.417
ENSG00000012061	P07992	2067	ERCC1	DNA excision repair protein ERCC-1 OS=Homo sapiens (Human) OX=9606 GN=ERCC1 PE=1 SV=1 source=Uniprot,https://www.uniprot.org/uniprot/P07992	32.5	56.7778	53.8359	69.4521	57.4389	51.1705	71.8191	61.0285	65.3607	68.4102	66.6155	64.0384	68.2754	57.7881	70.7245	56.8317	57.4581	60.8885	63.3612	70.4183	67.0565	71.761	64.6113	65.5267	65.8614
ENSG00000137801	P07996	7057	THBS1	Thrombospondin-1 OS=Homo sapiens (Human) OX=9606 GN=THBS1 PE=1 SV=2 source=Uniprot,https://www.uniprot.org/uniprot/P07996	129.3	1.23189	2.63713	3.45324	1.72015	3.16625	3.17274	2.08473	5.06651	4.1512	2.95123	3.96099	4.60393	1.84977	2.37029	2.35349	2.01146	3.34312	3.57363	2.5888	7.14241	6.7623	8.92896	11.1658	14.3949
ENSG00000185591	P08047	6667	SP1	Transcription factor Sp1 OS=Homo sapiens (Human) OX=9606 GN=SP1 PE=1 SV=3 source=Uniprot,https://www.uniprot.org/uniprot/P08047	80.6	170.986	129.07	137.736	198.978	170.526	248.1	162.458	161.736	159.482	138.044	149.145	190.726	62.6979	46.4494	87.4237	60.1265	42.0147	65.7967	48.9866	40.4984	52.8488	75.5429	52.0985	63.5893
ENSG00000140443	P08069	3480	IGF1R	Insulin-like growth factor 1 receptor OS=Homo sapiens (Human) OX=9606 GN=IGF1R PE=1 SV=1 source=Uniprot,https://www.uniprot.org/uniprot/P08069	154.7	4.17017	8.13588	5.56743	4.8245	5.58789	5.4558	4.21865	4.73769	5.16413	4.45316	5.62625	5.17826	4.67239	6.11122	6.90915	4.36524	5.16852	4.09123	4.28895	4.32067	4.50547	3.64722	3.92373	4.39625
ENSG00000164692	P08123	1278	COL1A2	Collagen alpha-2(I) chain OS=Homo sapiens (Human) OX=9606 GN=COL1A2 PE=1 SV=7 source=Uniprot,https://www.uniprot.org/uniprot/P08123	129.2	9.26839	12.9688	10.5551	11.4289	11.5953	10.3016	10.6434	9.11932	8.85292	10.045	10.7074	10.6977	13.1875	9.43536	9.13566	10.0479	10.2631	11.5227	13.0016	12.1806	14.003	14.0098	11.199	12.6006
ENSG00000197043	P08133	309	ANXA6	Annexin A6 OS=Homo sapiens (Human) OX=9606 GN=ANXA6 PE=1 SV=3 source=Uniprot,https://www.uniprot.org/uniprot/P08133	75.8	529.846	763.527	672.446	676.011	841.523	685.441	819.373	939.273	768.175	908.86	976.078	868.264	316.257	257.309	328.493	300.212	343.573	344.66	330.891	437.875	461.616	568.926	874.769	534.679
ENSG00000155366	P08134	389	RHOC	Rho-related GTP-binding protein RhoC OS=Homo sapiens (Human) OX=9606 GN=RHOC PE=1 SV=1 source=Uniprot,https://www.uniprot.org/uniprot/P08134	22	37.8677	43.362	42.4998	95.9564	55.6893	107.261	101.005	121.837	109.905	111.83	143.287	139.402	40.7256	46.0121	56.0515	36.8438	45.2468	71.9305	47.3003	52.8672	62.9735	25.5215	89.5304	97.6384
ENSG00000168003	P08195	6520	SLC3A2	4F2 cell-surface antigen heavy chain OS=Homo sapiens (Human) OX=9606 GN=SLC3A2 PE=1 SV=3 source=Uniprot,https://www.uniprot.org/uniprot/P08195	68	114.629	211.294	150.361	135.844	110.562	90.7376	106.431	125.649	98.6106	97.4595	92.7252	99.8315	99.0954	84.5849	89.5711	102.155	103.658	89.0828	111.784	100.2	103.679	92.5709	92.1787	93.5101
ENSG00000169919	P08236	2990	GUSB	Beta-glucuronidase OS=Homo sapiens (Human) OX=9606 GN=GUSB PE=1 SV=2 source=Uniprot,https://www.uniprot.org/uniprot/P08236	74.7	63.4627	64.6631	62.5355	58.8208	67.2463	58.7914	84.264	61.9697	75.7364	64.6108	65.5526	75.8707	54.8771	68.0751	55.1104	64.1007	63.9015	62.8649	76.4435	75.8961	74.122	88.5937	92.2408	90.1161
ENSG00000152556	P08237	5213	PFKM	ATP-dependent 6-phosphofructokinase, muscle type OS=Homo sapiens (Human) OX=9606 GN=PFKM PE=1 SV=2 source=Uniprot,https://www.uniprot.org/uniprot/P08237	85.1	387.518	382.156	296.898	397.904	366.722	350.358	507.006	387.888	447.687	366.986	376.972	458.395	458.024	453.43	473.515	594.794	585.966	505.212	569.29	573.851	518.779	565.429	550.963	588.657
ENSG00000096384	P08238	3326	HSP90AB1	Heat shock protein HSP 90-beta OS=Homo sapiens (Human) OX=9606 GN=HSP90AB1 PE=1 SV=4 source=Uniprot,https://www.uniprot.org/uniprot/P08238	83.2	1531.97	1684.2	1570.24	1590.77	1316.24	1806.07	1331.11	1372.05	1400.05	1312.52	1416.01	1446.55	1423.06	1373.05	1686.28	1626.35	1313.14	1474.21	1317.7	1188.52	1245.74	1192.76	1201.04	1183.16
ENSG00000182934	P08240	6734	SRPRA	Signal recognition particle receptor subunit alpha OS=Homo sapiens (Human) OX=9606 GN=SRPRA PE=1 SV=2 source=Uniprot,https://www.uniprot.org/uniprot/P08240	69.8	79.292	79.2675	78.394	71.1039	71.5729	63.0134	70.9669	66.3714	63.3408	60.3957	60.024	60.9907	64.7922	62.8981	54.5912	57.3013	65.9973	51.5143	59.1042	60.1672	49.319	49.9648	50.397	44.4018
ENSG00000070669	P08243	440	ASNS	Asparagine synthetase [glutamine-hydrolyzing] OS=Homo sapiens (Human) OX=9606 GN=ASNS PE=1 SV=4 source=Uniprot,https://www.uniprot.org/uniprot/P08243	64.3	164.506	173.13	156.543	234.719	177.453	180.879	178.36	201.705	183.191	156.998	150.276	161.255	161.232	151.042	195.408	200.07	187.548	196.264	198.936	221.176	193.216	154.171	155.534	168.015
ENSG00000102003	P08247	6855	SYP	Synaptophysin OS=Homo sapiens (Human) OX=9606 GN=SYP PE=1 SV=3 source=Uniprot,https://www.uniprot.org/uniprot/P08247	33.8	42.8281	63.3763	32.7328	42.2736	63.6334	31.556	46.969	57.4189	42.5455	43.4608	56.7367	36.8133	103.722	78.6181	94.0326	131.03	112.492	98.3114	103.064	97.8116	91.6717	99.1674	71.9632	97.3958
ENSG00000256269	P08397	3145	HMBS	Porphobilinogen deaminase OS=Homo sapiens (Human) OX=9606 GN=HMBS PE=1 SV=2 source=Uniprot,https://www.uniprot.org/uniprot/P08397	39.3	208.761	258.255	242.539	258.774	265.492	233.013	195.786	233.051	200.797	177.486	178.69	180.435	194.831	171.499	174.873	227.974	225.492	207.623	215.66	220.01	193.427	153.312	165.752	163.414
ENSG00000131828	P08559	5160	PDHA1	Pyruvate dehydrogenase E1 component subunit alpha, somatic form, mitochondrial OS=Homo sapiens (Human) OX=9606 GN=PDHA1 PE=1 SV=3 source=Uniprot,https://www.uniprot.org/uniprot/P08559	43.3	550.076	475.102	577.623	501.849	538.51	421.601	507.268	418.109	465.091	462.539	468.089	426.465	598.143	583.182	483.687	650.387	748.497	627.951	741.157	615.362	664.912	629.692	560.324	485.511
ENSG00000134871	P08572	1284	COL4A2	Collagen alpha-2(IV) chain OS=Homo sapiens (Human) OX=9606 GN=COL4A2 PE=1 SV=4 source=Uniprot,https://www.uniprot.org/uniprot/P08572	167.4	2.78398	4.66577	4.77912	6.67601	3.26537	3.33604	3.33045	3.84748	3.75886	3.09577	4.47572	3.82903	3.96042	2.56594	3.00402	3.20177	2.76644	2.88335	2.43058	2.93087	3.30483	3.94251	4.1903	3.35803
ENSG00000179091	P08574	1537	CYC1	Cytochrome c1, heme protein, mitochondrial OS=Homo sapiens (Human) OX=9606 GN=CYC1 PE=1 SV=3 source=Uniprot,https://www.uniprot.org/uniprot/P08574	35.4	260.419	246.504	248.384	263.867	298.1	264.383	248.122	231.619	240.948	267.212	268.827	250.207	303.35	258.829	244.801	314.741	378.622	347.172	397.973	340.207	348.216	313.982	345.26	326.706
ENSG00000125870	P08579	6629	SNRPB2	U2 small nuclear ribonucleoprotein B'' OS=Homo sapiens (Human) OX=9606 GN=SNRPB2 PE=1 SV=1 source=Uniprot,https://www.uniprot.org/uniprot/P08579	25.5	517.907	492.754	500.864	571.263	526.027	475.836	508.618	509.21	530.474	516.87	487.312	493.22	529.677	524.533	529.516	512.765	477.806	482.454	516.671	513.839	529.148	444.076	503.078	542.731
ENSG00000104852	P08621	6625	SNRNP70	U1 small nuclear ribonucleoprotein 70 kDa OS=Homo sapiens (Human) OX=9606 GN=SNRNP70 PE=1 SV=2 source=Uniprot,https://www.uniprot.org/uniprot/P08621	51.5	1206.56	1433.08	1463.86	1064.07	1459.36	1097.96	1144.99	1068.71	1145.06	988.02	1058.15	1113.31	1084.32	1121.48	1108.88	1064.66	1210.48	1008.46	983.686	1317.32	1321.41	1184.54	1038.8	1072.43
ENSG00000141905	P08651	4782	NFIC	Nuclear factor 1 C-type OS=Homo sapiens (Human) OX=9606 GN=NFIC PE=1 SV=2 source=Uniprot,https://www.uniprot.org/uniprot/P08651	55.6	30.5019	43.7668	35.1639	61.0034	85.7699	60.1503	117.122	128.998	112.563	182.622	135.707	131.265	25.8093	38.1844	36.9097	49.8436	46.5387	42.0604	45.3182	77.5213	68.9278	114.183	94.4181	90.5065
ENSG00000026025	P08670	7431	VIM	Vimentin OS=Homo sapiens (Human) OX=9606 GN=VIM PE=1 SV=4 source=Uniprot,https://www.uniprot.org/uniprot/P08670	53.6	4058.64	3918.25	3919.42	3873.7	4547.45	3859.79	4548.63	4724.76	4135.75	3438.32	3329.05	3810.61	1796.02	1313.07	1595	1692.21	1255.52	1586.12	1529.38	1470.29	1574.14	1633.26	1811.21	1527.89
ENSG00000182774	P08708	6218	RPS17	40S ribosomal protein S17 OS=Homo sapiens (Human) OX=9606 GN=RPS17 PE=1 SV=2 source=Uniprot,https://www.uniprot.org/uniprot/P08708	15.5	1351.28	1692.8	1585.23	1993.74	1504.59	1843.5	1458.54	1560.06	1688.24	1392.59	1572.73	1739.96	1885.55	1671.53	1812.11	2349.2	1477.76	1655.97	1508.94	1502	1523.12	1131.14	1427.73	1550.72
ENSG00000065135	P08754	2773	GNAI3	Guanine nucleotide-binding protein G(i) subunit alpha OS=Homo sapiens (Human) OX=9606 GN=GNAI3 PE=1 SV=3 source=Uniprot,https://www.uniprot.org/uniprot/P08754	40.5	97.6909	137.784	143.377	136.373	126.336	86.8636	126.615	123.688	112.9	135.816	135.744	112.358	133.144	130.214	78.9605	113.477	123.326	77.0428	102.658	118.682	118.248	112.682	126.8	111.313
ENSG00000164111	P08758	308	ANXA5	Annexin A5 OS=Homo sapiens (Human) OX=9606 GN=ANXA5 PE=1 SV=2 source=Uniprot,https://www.uniprot.org/uniprot/P08758	35.9	1087.58	1207.2	1219.04	1221.5	1276.6	1226.16	1339.57	1382.56	1326.69	1448.85	1549.2	1594.68	560.934	584.286	678.543	542.582	534.69	576.933	556.239	626.318	677.699	773.227	1111.52	881.503
ENSG00000168028	P08865	3921	RPSA	40S ribosomal protein SA OS=Homo sapiens (Human) OX=9606 GN=RPSA PE=1 SV=4 source=Uniprot,https://www.uniprot.org/uniprot/P08865	32.8	1269.17	1483.52	1372.41	1089.73	1178.22	1076.51	1092.66	1007.79	999.327	1047.49	987.912	949.424	920.499	929.446	954.138	992.411	1152.43	947.192	1174.27	1116.48	1044.75	1168.13	901.527	887.244
ENSG00000150594	P08913	150	ADRA2A	Alpha-2A adrenergic receptor OS=Homo sapiens (Human) OX=9606 GN=ADRA2A PE=1 SV=4 source=Uniprot,https://www.uniprot.org/uniprot/P08913	50.6	24.3171	39.884	38.8823	23.0509	24.0851	27.4252	17.6744	27.386	22.3044	23.2245	24.0734	19.6316	25.6553	21.6784	20.6355	41.9567	26.4128	40.9173	41.3055	33.7786	52.8305	53.3687	28.1777	32.8756
ENSG00000135404	P08962	967	CD63	CD63 antigen OS=Homo sapiens (Human) OX=9606 GN=CD63 PE=1 SV=2 source=Uniprot,https://www.uniprot.org/uniprot/P08962	25.6	193.521	190.718	272.145	142.383	143.718	125.821	239.317	163.273	175.348	191.99	186.328	154.261	135.808	124.782	113.052	114.706	119.749	101.599	134.862	132.449	189.321	239.458	187.722	122.599
ENSG00000114686	P09001	11222	MRPL3	39S ribosomal protein L3, mitochondrial OS=Homo sapiens (Human) OX=9606 GN=MRPL3 PE=1 SV=1 source=Uniprot,https://www.uniprot.org/uniprot/P09001	38.6	84.329	88.8457	103.179	94.9609	83.781	65.3882	74.607	68.064	85.2816	84.5771	81.1304	76.231	77.161	80.0929	66.4448	98.8216	90.4969	86.8737	108.499	78.9682	98.4732	79.0668	75.053	65.647
ENSG00000077312	P09012	6626	SNRPA	U1 small nuclear ribonucleoprotein A OS=Homo sapiens (Human) OX=9606 GN=SNRPA PE=1 SV=3 source=Uniprot,https://www.uniprot.org/uniprot/P09012	31.3	878.878	858.342	921.01	1087.92	952.527	1052.25	923.206	1013.16	947.602	880.608	930.295	932.992	1018.63	1001.93	987.632	1000.73	860.901	869.468	877.388	918.516	924.515	803.278	914.427	947.208
ENSG00000138685	P09038	2247	FGF2	Fibroblast growth factor 2 OS=Homo sapiens (Human) OX=9606 GN=FGF2 PE=1 SV=3 source=Uniprot,https://www.uniprot.org/uniprot/P09038	30.8	128.637	131.956	132.215	120.046	152.466	82.924	117.656	104.396	95.2047	85.0423	73.0949	84.629	66.8076	81.8213	57.9027	52.9259	67.8589	55.0819	58.954	67.3456	72.3852	60.7049	69.3778	61.3149
ENSG00000111674	P09104	2026	ENO2	Gamma-enolase OS=Homo sapiens (Human) OX=9606 GN=ENO2 PE=1 SV=3 source=Uniprot,https://www.uniprot.org/uniprot/P09104	47.2	565.986	600.976	530.652	628.712	644.885	710.482	755.161	939.554	802.806	822.941	785.396	908.794	1099.15	1205.77	1243.08	1111.77	1187.24	1215.82	1265	1336.09	1074.69	1279.88	1334.33	1656.04
ENSG00000060971	P09110	30	ACAA1	3-ketoacyl-CoA thiolase, peroxisomal OS=Homo sapiens (Human) OX=9606 GN=ACAA1 PE=1 SV=2 source=Uniprot,https://www.uniprot.org/uniprot/P09110	44.3	80.5964	105.578	91.3704	100.009	93.2781	104.191	85.2946	92.9043	94.3685	85.7538	84.4059	88.5861	92.0568	80.1789	88.2811	95.0629	80.3732	85.9728	93.5372	89.1981	84.3869	73.0264	68.3831	75.1675
ENSG00000153037	P09132	6728	SRP19	Signal recognition particle 19 kDa protein OS=Homo sapiens (Human) OX=9606 GN=SRP19 PE=1 SV=3 source=Uniprot,https://www.uniprot.org/uniprot/P09132	16.1	209.248	146.196	211.294	321.899	181.906	303.705	224.184	287.697	298.923	269.754	274.77	284.426	309.429	319.563	319.866	340.026	216.281	336.462	357.044	208.24	275.011	200.741	276.436	319.192
ENSG00000084207	P09211	2950	GSTP1	Glutathione S-transferase P OS=Homo sapiens (Human) OX=9606 GN=GSTP1 PE=1 SV=2 source=Uniprot,https://www.uniprot.org/uniprot/P09211	23.3	3378.32	3466.13	3079.54	2466.84	2939.36	2943.57	3066.8	2732.83	2975.65	3155.3	2950.45	3321.76	1697.72	2140.91	2339.21	2107.59	2391.02	2379.7	2535.02	2630.4	2688.59	3381.24	2925.92	3143.34
ENSG00000124562	P09234	6631	SNRPC	U1 small nuclear ribonucleoprotein C OS=Homo sapiens (Human) OX=9606 GN=SNRPC PE=1 SV=1 source=Uniprot,https://www.uniprot.org/uniprot/P09234	17.4	801.987	833.495	794.982	842.754	857.053	719.488	804.782	757.186	737.714	760.363	710.655	738.958	725.452	729.97	693.052	693.6	749.369	628.39	666.523	833.662	729.185	730.477	711.845	762.612
ENSG00000100097	P09382	3956	LGALS1	Galectin-1 OS=Homo sapiens (Human) OX=9606 GN=LGALS1 PE=1 SV=2 source=Uniprot,https://www.uniprot.org/uniprot/P09382	14.7	262.034	291.589	332.945	259.243	294.609	434.978	848.935	616.413	643.657	1512.07	2416.52	1674.76	462.644	274.214	354.407	300.032	303.799	475.548	345.164	453.084	756.21	1053.6	1862.7	1201.25
ENSG00000151552	P09417	5860	QDPR	Dihydropteridine reductase OS=Homo sapiens (Human) OX=9606 GN=QDPR PE=1 SV=2 source=Uniprot,https://www.uniprot.org/uniprot/P09417	25.8	217.51	243.654	231.955	257.212	283.952	262.727	443.109	294.324	376.337	252.013	287.131	454.011	207.641	207.176	225.488	313.582	315.137	314.283	358.549	300.783	286.493	305.38	302.076	313.45
ENSG00000189403	P09429	3146	HMGB1	High mobility group protein B1 OS=Homo sapiens (Human) OX=9606 GN=HMGB1 PE=1 SV=3 source=Uniprot,https://www.uniprot.org/uniprot/P09429	24.9	4335.98	4193.8	5473.63	6181.68	5491.42	7253.75	5767.66	6036.66	6701.92	6467.38	6949.53	7489.29	5704.17	5918.52	6736.1	6243.04	5458.43	6392.97	5249.79	5587.72	6365.24	5235.99	6213.87	7156.82
ENSG00000114115	P09455	5947	RBP1	Retinol-binding protein 1 OS=Homo sapiens (Human) OX=9606 GN=RBP1 PE=1 SV=2 source=Uniprot,https://www.uniprot.org/uniprot/P09455	15.8	1925.01	669.243	619.276	983.101	386.447	861.764	3387.83	372.615	1851.16	829.868	1551.79	2067.68	1485.54	831.789	892.651	1169.79	736.218	1100	558.191	374.429	801.84	669.568	1117.07	1516.5
ENSG00000087258	P09471	2775	GNAO1	Guanine nucleotide-binding protein G(o) subunit alpha OS=Homo sapiens (Human) OX=9606 GN=GNAO1 PE=1 SV=4 source=Uniprot,https://www.uniprot.org/uniprot/P09471	40	240.133	258.028	230.336	268.632	279.337	289.789	257.731	267.457	250.101	265.875	267.898	257.864	369.691	352.188	371.645	310.112	397.965	348.738	364.834	345.839	332.837	381.323	375.449	404.65
ENSG00000113140	P09486	6678	SPARC	SPARC OS=Homo sapiens (Human) OX=9606 GN=SPARC PE=1 SV=1 source=Uniprot,https://www.uniprot.org/uniprot/P09486	34.6	69.7526	89.2682	59.2248	57.2768	60.6175	117.436	50.6816	63.1294	56.3291	42.6742	55.8684	57.3761	28.9038	31.2501	53.9076	23.7413	34.0079	26.9182	25.6049	35.8062	20.5972	44.6281	49.2707	38.7488
ENSG00000134184	P09488	2944	GSTM1	Glutathione S-transferase Mu 1 OS=Homo sapiens (Human) OX=9606 GN=GSTM1 PE=1 SV=3 source=Uniprot,https://www.uniprot.org/uniprot/P09488	25.7	140.555	142.378	128.15	127.808	143.209	116.717	117.434	119.711	110.959	90.9016	86.4554	112.994	49.2347	52.1271	73.3787	52.114	64.3482	70.3245	57.3591	66.7271	67.2208	53.4182	72.8688	68.3379
ENSG00000140416	P09493	7168	TPM1	Tropomyosin alpha-1 chain OS=Homo sapiens (Human) OX=9606 GN=TPM1 PE=1 SV=2 source=Uniprot,https://www.uniprot.org/uniprot/P09493	32.7	171.441	344.658	220.765	98.1954	134.102	77.9249	124.159	88.582	89.0969	80.4461	92.473	81.7021	145.12	108.809	95.4453	100.818	111.499	75.1839	112.099	121.609	104.535	180.288	121.245	107.616
ENSG00000122705	P09496	1211	CLTA	Clathrin light chain A OS=Homo sapiens (Human) OX=9606 GN=CLTA PE=1 SV=1 source=Uniprot,https://www.uniprot.org/uniprot/P09496	27.1	799.361	754.961	780.563	753.098	783.276	742.609	907.254	842.797	875.61	859.608	899.041	839.028	1044.63	1261.35	1290.26	1011.17	1375.86	1185.56	1282.19	1209.29	1187.15	1458.08	1190.6	1189.92
ENSG00000175416	P09497	1212	CLTB	Clathrin light chain B OS=Homo sapiens (Human) OX=9606 GN=CLTB PE=1 SV=1 source=Uniprot,https://www.uniprot.org/uniprot/P09497	25.2	259.082	236.681	272.811	364.746	218.905	334.041	336.022	361.428	368.701	370.472	386.706	416.195	670.128	715.438	716.834	765.772	475.67	584.346	567.147	401.308	520.397	444.772	554.969	627.07
ENSG00000196975	P09525	307	ANXA4	Annexin A4 OS=Homo sapiens (Human) OX=9606 GN=ANXA4 PE=1 SV=4 source=Uniprot,https://www.uniprot.org/uniprot/P09525	35.9	44.9933	52.0355	38.2499	32.0915	56.8492	45.1443	61.5224	48.8224	55.4891	55.9364	55.0209	55.2817	31.2564	25.9289	28.8762	26.4899	31.1479	31.3533	32.7948	44.235	38.399	53.3554	56.2916	59.6639
ENSG00000173786	P09543	1267	CNP	2',3'-cyclic-nucleotide 3'-phosphodiesterase OS=Homo sapiens (Human) OX=9606 GN=CNP PE=1 SV=2 source=Uniprot,https://www.uniprot.org/uniprot/P09543	47.5	235.907	218.482	231.883	277.789	231.577	250.67	282.103	274.721	274.569	308.035	351.012	353.37	189.345	189.107	173.274	173.961	136.593	164.2	178.285	150.525	179.446	193.487	221.032	214.768
ENSG00000113721	P09619	5159	PDGFRB	Platelet-derived growth factor receptor beta OS=Homo sapiens (Human) OX=9606 GN=PDGFRB PE=1 SV=1 source=Uniprot,https://www.uniprot.org/uniprot/P09619	123.9	4.08497	8.14423	4.70028	3.62425	4.5009	4.40027	6.27356	4.56011	5.88577	4.10668	5.2797	5.84981	3.87268	3.6326	4.09263	2.91627	2.73847	4.62523	3.03369	4.0471	5.30353	4.94195	8.77226	5.6594
ENSG00000091140	P09622	1738	DLD	Dihydrolipoyl dehydrogenase, mitochondrial OS=Homo sapiens (Human) OX=9606 GN=DLD PE=1 SV=2 source=Uniprot,https://www.uniprot.org/uniprot/P09622	54.1	357.217	437.531	439.422	496.719	468.524	445.19	406.082	353.01	416.142	372.87	405.259	391.946	606.443	561.599	545.762	746.763	629.133	589.453	671.239	542.322	615.243	503.165	516.14	491.659
ENSG00000135486	P09651	3178	HNRNPA1	Heterogeneous nuclear ribonucleoprotein A1 OS=Homo sapiens (Human) OX=9606 GN=HNRNPA1 PE=1 SV=5 source=Uniprot,https://www.uniprot.org/uniprot/P09651	38.7	892.954	979.561	1117.4	1423.87	1217.12	1793.59	1118.52	1167.44	1392.95	1131.29	1263.74	1443.16	1528.91	1499.03	1785.05	1553.52	1219.95	1523.51	1208.78	1299.31	1424.2	947.168	1279.64	1614.2
ENSG00000131876	P09661	6627	SNRPA1	U2 small nuclear ribonucleoprotein A' OS=Homo sapiens (Human) OX=9606 GN=SNRPA1 PE=1 SV=2 source=Uniprot,https://www.uniprot.org/uniprot/P09661	28.4	1266.1	1014.5	1176.25	1095.69	1119.36	1110.42	1066.81	1048.29	1094.32	1044.16	1090.68	1020.55	1023.04	1162.23	1048.26	983.172	1031.3	1000.55	1089.05	1076.13	1136.1	1115.77	1064.41	1039.81
ENSG00000164919	P09669	1345	COX6C	Cytochrome c oxidase subunit 6C OS=Homo sapiens (Human) OX=9606 GN=COX6C PE=1 SV=2 source=Uniprot,https://www.uniprot.org/uniprot/P09669	8.8	344.524	480.264	466.454	512.408	382.836	585.995	503.531	527.341	529.321	606.028	890.571	890.34	735.403	773.617	869.459	627.297	404.013	539.637	548.651	484.252	514.046	481.274	724.204	812.345
ENSG00000143799	P09874	142	PARP1	Poly [ADP-ribose] polymerase 1 OS=Homo sapiens (Human) OX=9606 GN=PARP1 PE=1 SV=4 source=Uniprot,https://www.uniprot.org/uniprot/P09874	113	1318.76	1350.24	1434.28	1250.43	1441.08	1090.39	1308.87	1156.8	1186.68	1249.28	1179.56	1135.23	756.641	792.905	789.516	849.253	895.265	759.214	859.299	965.597	953.813	936.818	827.928	879.894
ENSG00000101868	P09884	5422	POLA1	DNA polymerase alpha catalytic subunit OS=Homo sapiens (Human) OX=9606 GN=POLA1 PE=1 SV=2 source=Uniprot,https://www.uniprot.org/uniprot/P09884	165.8	104.609	87.4819	102.887	83.24	84.618	89.7476	88.3388	73.7339	88.547	98.1743	95.5165	93.2493	28.5343	27.2291	30.4923	28.8965	26.9041	26.673	28.047	29.8991	28.0426	30.2366	28.1671	25.365
ENSG00000154277	P09936	7345	UCHL1	Ubiquitin carboxyl-terminal hydrolase isozyme L1 OS=Homo sapiens (Human) OX=9606 GN=UCHL1 PE=1 SV=2 source=Uniprot,https://www.uniprot.org/uniprot/P09936	24.8	2385.98	2628.23	2471.12	2639.48	2549.72	2430.93	2608.56	2941.57	2702.72	2395.82	2324.05	2116.58	4750.89	5411.27	4981.25	5087.37	5273	4706.42	7099.6	5828.95	5535.6	5666.11	4983.43	4913.41
ENSG00000111144	P09960	4048	LTA4H	Leukotriene A-4 hydrolase OS=Homo sapiens (Human) OX=9606 GN=LTA4H PE=1 SV=2 source=Uniprot,https://www.uniprot.org/uniprot/P09960	69.2	400.513	502.703	439.919	377.016	432.891	314.283	380.74	375.64	373.519	316.218	334.173	369.567	342.368	388.839	323.643	325.688	302.089	263.853	311.36	355.188	317.27	370.993	347.258	339.232
ENSG00000109107	P09972	230	ALDOC	Fructose-bisphosphate aldolase C OS=Homo sapiens (Human) OX=9606 GN=ALDOC PE=1 SV=2 source=Uniprot,https://www.uniprot.org/uniprot/P09972	39.4	438.75	425.855	352.931	412.363	470.17	454.373	453.225	679.617	513.988	433.274	404.043	507.232	462.351	334.761	367.709	386.992	425.819	407.769	375.213	510.58	406.025	356.166	405.686	478.68
ENSG00000174013	P0C2W1	200933	FBXO45	F-box/SPRY domain-containing protein 1 OS=Homo sapiens (Human) OX=9606 GN=FBXO45 PE=1 SV=1 source=Uniprot,https://www.uniprot.org/uniprot/P0C2W1	30.6	19.3439	39.4757	29.314	26.9158	33.9326	23.3054	28.3827	25.3242	27.4833	28.5832	24.1812	28.6219	30.3556	21.7306	25.4207	24.5945	29.1997	23.3966	26.6378	38.9618	26.6305	22.7899	26.0216	28.558
ENSG00000255529	P0CAP2	81488	POLR2M	DNA-directed RNA polymerase II subunit GRINL1A OS=Homo sapiens (Human) OX=9606 GN=POLR2M PE=1 SV=1 source=Uniprot,https://www.uniprot.org/uniprot/P0CAP2	41.7	19.9158	21.6611	18.4484	18.809	18.5981	11.9499	17.5652	18.629	17.6114	19.0257	19.1806	18.4448	16.7138	16.0463	10.4576	12.5005	15.739	12.6921	14.0691	14.9892	13.8413	15.5528	18.1701	14.3284
ENSG00000286140	P0CG12		DERPC	Decreased expression in renal and prostate cancer protein OS=Homo sapiens (Human) OX=9606 GN=DERPC PE=1 SV=1 source=Uniprot,https://www.uniprot.org/uniprot/P0CG12	51.4	23.3429	27.7899	24.2044	23.8703	26.7167	21.1121	24.2061	29.4369	24.1486	23.2583	23.4816	22.8893	21.8946	24.6235	20.3588	22.757	28.8643	23.7923	25.5339	29.6422	26.0173	27.1659	32.7854	28.0113
ENSG00000236609	P0CG23	54753	ZNF853	Zinc finger protein 853 OS=Homo sapiens (Human) OX=9606 GN=ZNF853 PE=2 SV=1 source=Uniprot,https://www.uniprot.org/uniprot/P0CG23	74.8	15.3551	12.8368	14.0357	16.2665	16.3643	22.8401	19.1551	19.7787	23.6323	21.1901	19.4666	24.3236	18.0492	18.6712	20.4907	20.3728	17.3626	19.8245	21.5065	23.1674	23.9557	31.2422	27.2082	28.3504
P0CG31	P0CG31		ZNF286B	Putative zinc finger protein 286B OS=Homo sapiens (Human) OX=9606 GN=ZNF286B PE=5 SV=1 source=Uniprot,https://www.uniprot.org/uniprot/P0CG31	59.5	5.48624	2.47259	6.13523	7.53547	1.71469	11.1801	7.78953	12.3432	8.54566	8.50436	19.4725	11.1848	7.95735	9.58164	8.71207	7.80664	2.11945	7.78148	7.64631	2.49705	7.09153	9.1415	15.4355	12.7671
ENSG00000158164	P0CG34	11013	TMSB15A	Thymosin beta-15A OS=Homo sapiens (Human) OX=9606 GN=TMSB15A PE=1 SV=1 source=Uniprot,https://www.uniprot.org/uniprot/P0CG34	5.2	1654.96	1808.6	1383.67	1675.87	1626.52	2242.41	1542.25	1303.38	1561.54	1628.76	1598.88	1565.62	1690.3	1745.98	2255.12	1585.33	1376.66	1596.85	1352.17	1352.38	1253.34	1615.19	1311.16	1412.6
ENSG00000261221	P0CJ78	100507290	ZNF865	Zinc finger protein 865 OS=Homo sapiens (Human) OX=9606 GN=ZNF865 PE=1 SV=1 source=Uniprot,https://www.uniprot.org/uniprot/P0CJ78	111	25.6354	29.8489	32.5877	32.777	29.248	44.3936	30.6767	36.2407	39.0206	34.2177	46.2876	43.2715	38.8657	51.1413	44.1482	38.6277	31.5092	43.25	32.9168	33.909	41.1767	30.2102	41.2092	42.0106
ENSG00000189339	P0CK96	728661	SLC35E2B			7.15873	9.91405	10.5248	5.59095	7.76099	4.2702	6.64274	7.05654	7.23594	8.05246	7.52513	6.1142	11.5272	12.6159	9.47479	9.00869	11.9426	8.474	12.1506	10.635	14.522	15.0063	9.86902	10.2185
ENSG00000235961	P0CW24	84968	PNMA6A			1.51339	1.72953	1.77479	1.51371	1.84094	1.64487	1.87248	2.01604	1.84273	1.71784	2.15732	1.25481	3.7332	3.59143	3.24125	2.65286	3.40399	3.44661	3.57398	4.48201	3.06997	3.17449	3.98483	3.42598
ENSG00000256060	P0DI82	10597	TRAPPC2B	Trafficking protein particle complex subunit 2B OS=Homo sapiens (Human) OX=9606 GN=TRAPPC2B PE=1 SV=1 source=Uniprot,https://www.uniprot.org/uniprot/P0DI82	16.4	88.1798	85.179	130.485	109.524	79.5612	113.688	91.5123	114.951	120.7	118.06	123.318	116.01	121.994	147.084	142.002	145.219	120.189	129.199	137.015	118.113	134.317	111.974	133.676	131.293
ENSG00000224531	P0DJ93	221710	SMIM13	Small integral membrane protein 13 OS=Homo sapiens (Human) OX=9606 GN=SMIM13 PE=3 SV=1 source=Uniprot,https://www.uniprot.org/uniprot/P0DJ93	10.3	104.971	105.434	96.1671	177.742	132.815	157.735	151.714	159.694	143.53	153.84	127.542	126.327	250.889	249.91	197.753	283.03	245.737	206.069	208.882	231.945	212.138	140.104	201.829	194.4
ENSG00000259330	P0DMQ5	100505573	INAFM2	Putative transmembrane protein INAFM2 OS=Homo sapiens (Human) OX=9606 GN=INAFM2 PE=2 SV=1 source=Uniprot,https://www.uniprot.org/uniprot/P0DMQ5	15.4	11.9752	12.5455	10.4308	12.8966	16.0202	11.3695	8.59254	14.7853	9.6288	10.5331	10.3039	10.4456	14.5899	17.6602	14.7028	14.4516	20.7602	14.5969	12.739	17.0674	11.5769	10.2265	13.2595	10.6079
ENSG00000204389	P0DMV8	3303	HSPA1A	Heat shock 70 kDa protein 1A OS=Homo sapiens (Human) OX=9606 GN=HSPA1A PE=1 SV=1 source=Uniprot,https://www.uniprot.org/uniprot/P0DMV8	70	806.135	736.354	746.914	813.464	747.973	992.213	847.772	835.867	855.89	680.443	865.396	1027.01	869.119	836.059	976.083	711.646	670.804	841.613	631.454	686.005	673.539	518.113	659.272	847.704
ENSG00000274276	P0DN79	102724560	CBSL	Cystathionine beta-synthase-like protein OS=Homo sapiens (Human) OX=9606 GN=CBSL PE=1 SV=1 source=Uniprot,https://www.uniprot.org/uniprot/P0DN79	60.5	165.685	143.926	157.798	188.545	169.388	188.21	144.647	152.726	154.264	147.461	111.651	120.784	145.95	75.9725	140.635	257.169	304.375	270.853	232.325	196.877	190.119	137.284	107.845	127.718
ENSG00000143933	P0DP24	805	CALM2	Calmodulin-1 OS=Mus musculus (Mouse) OX=10090 GN=Calm1 PE=1 SV=1	16.8	2876.26	2683.14	2447.84	3205.42	2914.05	3108.92	3294.49	3298.54	3389.41	3632.56	3148.21	3365.34	4330.61	4199.23	4159.82	4928.76	4991.93	4282.53	4869.9	4081.06	4255.22	4271.54	3669.08	4083.35
ENSG00000186184	P0DPB6	51082	POLR1D	DNA-directed RNA polymerases I and III subunit RPAC2 OS=Homo sapiens (Human) OX=9606 GN=POLR1D PE=1 SV=1 source=Uniprot,https://www.uniprot.org/uniprot/P0DPB6	15.2	129.236	113.375	146.748	96.3593	117.805	97.3496	108.091	104.411	117.129	103.058	100.743	113.777	96.5528	83.0569	77.2134	91.591	110.96	143.666	100.692	119.92	121.601	102.321	102.928	101.73
ENSG00000074047	P10070	2736	GLI2	Zinc finger protein GLI2 OS=Homo sapiens (Human) OX=9606 GN=GLI2 PE=1 SV=4 source=Uniprot,https://www.uniprot.org/uniprot/P10070	167.7	5.95524	6.14667	6.68168	6.74186	4.42301	4.45532	6.14102	4.12659	4.77605	7.33345	4.55648	5.0479	1.01032	0.706758	1.26847	0.983367	1.06651	1.39139	1.65567	1.56168	2.10721	2.04326	1.29564	1.47704
ENSG00000137714	P10109	2230	FDX1	Adrenodoxin, mitochondrial OS=Homo sapiens (Human) OX=9606 GN=FDX1 PE=1 SV=1 source=Uniprot,https://www.uniprot.org/uniprot/P10109	19.4	83.599	71.7938	66.0116	28.3144	77.3581	29.8609	67.395	27.6407	37.3252	37.2505	25.6014	39.0926	24.2953	18.586	20.6482	25.1458	34.9335	23.0551	29.0921	43.8479	34.5073	44.2235	22.0568	34.5457
ENSG00000125249	P10114	5911	RAP2A	Ras-related protein Rap-2a OS=Homo sapiens (Human) OX=9606 GN=RAP2A PE=1 SV=1 source=Uniprot,https://www.uniprot.org/uniprot/P10114	20.6	99.2677	117.577	114.249	91.381	123.55	61.8131	123.108	88.0793	82.3214	109.718	112.394	93.2161	73.3454	64.3261	54.3859	86.0258	125.015	77.0748	160.71	158.402	120.344	210.706	124.057	106.073
ENSG00000116747	P10155	6738	RO60	60 kDa SS-A/Ro ribonucleoprotein OS=Homo sapiens (Human) OX=9606 GN=RO60 PE=1 SV=2 source=Uniprot,https://www.uniprot.org/uniprot/P10155	60.6	400.275	485.178	411.493	440.154	484.427	421.612	462.24	494.046	451.738	445.489	454.805	471.281	355.895	434.373	395.774	354.298	376.883	331.423	355.733	358.058	330.948	357.4	364.594	340.431
ENSG00000176340	P10176	1351	COX8A			209.961	248.551	240.554	266.775	241.48	275.123	246.461	248.201	278.492	282.994	291.917	285.182	369.245	309.417	317.057	317.076	280.512	284.103	259.134	268.856	287.17	210.09	294.305	259.546
ENSG00000171298	P10253	2548	GAA	Lysosomal alpha-glucosidase OS=Homo sapiens (Human) OX=9606 GN=GAA PE=1 SV=4 source=Uniprot,https://www.uniprot.org/uniprot/P10253	105.3	93.5833	140.555	105.705	85.3934	100.8	96.3241	95.0899	92.4942	109.18	83.8226	114.302	114.604	128.991	185.784	158.183	133.292	156.951	130.419	140.031	138.779	144.242	115.55	141.274	147.054
ENSG00000078061	P10398	369	ARAF	Serine/threonine-protein kinase A-Raf OS=Homo sapiens (Human) OX=9606 GN=ARAF PE=1 SV=2 source=Uniprot,https://www.uniprot.org/uniprot/P10398	67.5	10.302	5.02478	16.3647	5.84879	5.53664	15.5684	8.07822	10.6177	11.7266	10.8533	12.8643	12.4122	4.25207	9.0416	9.48285	6.14483	5.94597	7.43914	5.23767	6.16739	6.26642	6.89142	9.00586	4.92183
ENSG00000168298	P10412	3008	H1-4	Histone H1.4 OS=Homo sapiens (Human) OX=9606 GN=H1-4 PE=1 SV=2 source=Uniprot,https://www.uniprot.org/uniprot/P10412	21.9	1943.55	1650.38	1959.92	2390.21	2283.51	2667.26	2468.79	2362.45	2288.62	2744.08	3012.09	2443.6	2127.13	2038.48	2245.38	2198.92	1727.58	1816.55	1829.84	2201.45	2031.69	2117.13	2569.49	2541.33
ENSG00000150768	P10515	1737	DLAT	Dihydrolipoyllysine-residue acetyltransferase component of pyruvate dehydrogenase complex, mitochondrial OS=Homo sapiens (Human) OX=9606 GN=DLAT PE=1 SV=3 source=Uniprot,https://www.uniprot.org/uniprot/P10515	69	156.176	155.095	137.145	140.849	168.272	124.903	153.677	105.127	132.019	128.588	115.856	128.983	164.457	158.357	153.324	175.114	210.184	170.658	208.025	200.624	167.974	193.368	153.929	154.126
ENSG00000142949	P10586	5792	PTPRF	Receptor-type tyrosine-protein phosphatase F OS=Homo sapiens (Human) OX=9606 GN=PTPRF PE=1 SV=2 source=Uniprot,https://www.uniprot.org/uniprot/P10586	212.7	6.9208	6.38445	7.94843	5.14757	5.22347	3.86779	5.47389	5.1703	4.77666	4.98039	4.69049	5.21057	5.02241	4.48914	4.6329	4.41816	5.10514	4.01167	4.75137	4.99655	5.18358	5.91867	4.93657	4.36936
ENSG00000160113	P10588	2063	NR2F6	Nuclear receptor subfamily 2 group F member 6 OS=Homo sapiens (Human) OX=9606 GN=NR2F6 PE=1 SV=2 source=Uniprot,https://www.uniprot.org/uniprot/P10588	43	37.5423	20.6709	26.014	26.0895	23.3361	17.5461	31.9917	18.5517	25.5569	24.4969	19.1327	24.3256	23.0646	23.7009	16.6637	19.8352	15.3793	20.1188	21.9276	15.995	25.4449	23.8031	13.5129	21.9728
ENSG00000175745	P10589	7025	NR2F1	COUP transcription factor 1 OS=Homo sapiens (Human) OX=9606 GN=NR2F1 PE=1 SV=1 source=Uniprot,https://www.uniprot.org/uniprot/P10589	46.1	42.3008	31.3612	55.7585	55.075	38.7069	38.7725	44.0459	49.8283	41.1224	39.7118	46.6098	34.4465	31.8025	27.0729	29.1838	42.6228	31.0411	30.7918	41.8485	31.207	47.6281	44.1652	38.7077	33.687
ENSG00000136810	P10599	7295	TXN	Thioredoxin OS=Homo sapiens (Human) OX=9606 GN=TXN PE=1 SV=3 source=Uniprot,https://www.uniprot.org/uniprot/P10599	11.7	1254.54	1304.45	1280.14	1344.77	1329.33	1223.06	1517.51	1321.13	1426	1283.63	1444.14	1294.19	1446.71	1759.53	1911.7	1539.44	1400.31	1363.6	1554.38	1569.86	1561.42	1580.65	1609.42	1641.9
ENSG00000135940	P10606	1329	COX5B	Cytochrome c oxidase subunit 5B, mitochondrial OS=Homo sapiens (Human) OX=9606 GN=COX5B PE=1 SV=2 source=Uniprot,https://www.uniprot.org/uniprot/P10606	13.7	537.997	754.807	591.859	441.298	587.856	457.327	525.23	398.057	465.428	536.491	500.412	501.64	581.159	486.119	503.472	501.424	646.602	512.873	531.777	616.578	582.371	656.312	522.415	492.121
ENSG00000064601	P10619	5476	CTSA	Lysosomal protective protein OS=Homo sapiens (Human) OX=9606 GN=CTSA PE=1 SV=2 source=Uniprot,https://www.uniprot.org/uniprot/P10619	54.4	160.655	193.616	172.947	183.504	167.755	170.568	188.512	143.796	168.022	151.781	187.91	173.058	169.615	196.276	153.43	174.417	175.626	142.513	182.408	166.296	172.45	202.91	210.202	175.249
ENSG00000156976	Q14240	1974	EIF4A2	Eukaryotic initiation factor 4A-II OS=Mus musculus (Mouse) OX=10090 GN=Eif4a2 PE=1 SV=2	46.4	206.05	249.605	206.039	280.769	234.158	262.54	242.104	282.51	270.618	225.752	239.117	260.222	400.181	432.201	431.281	513.712	352.122	410.17	513.175	386.23	332.001	370.89	356.571	363.057
ENSG00000186868	P10636	4137	MAPT	Microtubule-associated protein tau OS=Homo sapiens (Human) OX=9606 GN=MAPT PE=1 SV=5 source=Uniprot,https://www.uniprot.org/uniprot/P10636	78.9	171.604	149.737	139.858	166.926	155.008	184.637	202.096	232.617	218.775	223.875	215.019	201.094	705.31	676.191	598.572	687.795	710.86	572.742	797.098	696.007	600.853	766.132	694.023	706.693
ENSG00000108946	P10644	5573	PRKAR1A	cAMP-dependent protein kinase type I-alpha regulatory subunit OS=Homo sapiens (Human) OX=9606 GN=PRKAR1A PE=1 SV=1 source=Uniprot,https://www.uniprot.org/uniprot/P10644	43	272.54	210.12	199.524	171.186	172.323	165.388	268.647	170.745	236.944	182.81	184.266	212.128	225.683	198.062	181.293	144.624	151.549	183.632	156.784	149.357	166.025	182.276	177.114	172.214
ENSG00000188690	P10746	7390	UROS	Uroporphyrinogen-III synthase OS=Homo sapiens (Human) OX=9606 GN=UROS PE=1 SV=1 source=Uniprot,https://www.uniprot.org/uniprot/P10746	28.6	89.6413	88.7652	74.845	75.1651	74.0853	88.4889	88.0384	93.1843	84.0475	83.5238	86.8657	89.1835	83.2053	106.476	90.2924	80.2791	82.7157	115.672	85.1902	80.0149	83.2763	92.3424	88.7163	93.4246
ENSG00000139684	P10768	2098	ESD	S-formylglutathione hydrolase OS=Homo sapiens (Human) OX=9606 GN=ESD PE=1 SV=2 source=Uniprot,https://www.uniprot.org/uniprot/P10768	31.4	410.271	436.127	402.89	406.968	385.323	390.634	413.356	364.322	395.822	381.45	348.302	415.533	346.301	330.209	365.505	443.425	425.176	407.465	453.092	405.043	376.588	428.193	362.597	401.037
[truncated: 5,663 more rows]
