# Supplementary material for: Integrated transcriptome and proteome analysis reveals posttranscriptional regulation of ribosomal genes in human brain organoids
Source: eLife. 2023 Mar 29;12:e85135. doi: 10.7554/eLife.85135 (PMC10059687; doi:10.7554/eLife.85135)
Supplement: Figure 1—source data 3. [file elife-85135-fig1-data3.xlsx]

## Sheet: Summary
Table	Information
Z-score normalised combined	Gene-wise Z-score normalised RNA and protein distribution in progenitors and neurons
Module clustering	Module assignment of genes

## Sheet: z-score normalised combined
ENSG_id	UniProt	gene_id	gene_symbol	nproteomics.gfp.day40.rep1	nproteomics.gfp.day40.rep2	nproteomics.gfp.day40.rep3	nproteomics.tomato.day40.rep1	nproteomics.tomato.day40.rep2	nproteomics.tomato.day40.rep3	nproteomics.gfp.day60.rep1	nproteomics.gfp.day60.rep2	nproteomics.gfp.day60.rep3	nproteomics.tomato.day60.rep1	nproteomics.tomato.day60.rep2	nproteomics.tomato.day60.rep3	nproteomics.gfp.day90.rep1	nproteomics.gfp.day90.rep2	nproteomics.gfp.day90.rep3	nproteomics.tomato.day90.rep1	nproteomics.tomato.day90.rep2	nproteomics.tomato.day90.rep3	nproteomics.gfp.day120.rep1	nproteomics.gfp.day120.rep2	nproteomics.gfp.day120.rep3	nproteomics.tomato.day120.rep1	nproteomics.tomato.day120.rep2	nproteomics.tomato.day120.rep3	nrna.gfp.day40.rep1	nrna.gfp.day40.rep2	nrna.gfp.day40.rep3	nrna.tomato.day40.rep1	nrna.tomato.day40.rep2	nrna.tomato.day40.rep3	nrna.gfp.day60.rep1	nrna.gfp.day60.rep2	nrna.gfp.day60.rep3	nrna.tomato.day60.rep1	nrna.tomato.day60.rep2	nrna.tomato.day60.rep3	nrna.gfp.day90.rep1	nrna.gfp.day90.rep2	nrna.gfp.day90.rep3	nrna.tomato.day90.rep1	nrna.tomato.day90.rep2	nrna.tomato.day90.rep3	nrna.gfp.day120.rep1	nrna.gfp.day120.rep2	nrna.gfp.day120.rep3	nrna.tomato.day120.rep1
dTomato	dTomato		dTomato	-1.27459	-1.44258	-1.11592	0.653132	0.600222	1.1905	-1.14434	-1.18876	-0.367307	0.387903	1.19324	1.24517	-1.02501	-0.848036	-0.373987	0.962579	1.27767	1.22913	-0.863822	-0.92847	-0.486716	0.749732	0.436491	1.13378	-1.27963	-1.02218	-0.966461	0.846029	0.822088	1.36783	-0.876981	-1.35071	-1.09009	1.28297	0.888929	1.25813	-0.830905	-0.898109	-0.359536	0.543209	1.12564	1.03927	-0.968758	-0.894657	-0.744325	1.13235
ENSG00000204272	A0A0U1RRE5	550643	NBDY	-0.713517	-2.228	-1.545	1.39695	1.58748	1.3456	-0.122729	-1.31263	-0.116013	1.09932	-0.064492	0.325376	-0.952642	1.23952	-0.256703	1.54396	0.177763	0.174708	-0.215411	-0.584646	-0.589007	-0.218477	-0.141545	0.170144	0.602659	1.03405	1.10111	1.57667	2.38462	1.23577	-0.0873012	0.183009	-0.71519	0.295448	0.20107	0.581517	-0.705381	-0.0403279	-1.34467	-0.413816	0.177434	-0.0507138	-1.50549	-1.4231	-1.33088	-0.716083
ENSG00000224109	A0A0U1RRI6	347549	CENPVL3	2.08514	0.0365024	0.787143	0.284578	1.03335	-1.48549	-0.520439	1.45303	0.189666	-1.60732	0.588445	-0.255459	0.822743	1.08504	0.442917	-0.663219	0.151641	0.0292603	0.466789	-0.328501	-0.82392	-1.16733	-0.598968	-2.00561	1.39074	1.1366	1.20787	0.601623	0.787644	0.422824	0.783548	0.939936	1.27619	-0.694607	-1.27977	-0.79833	0.583202	0.559883	0.417712	-1.00325	-1.51019	-1.2234	0.216474	0.545731	-0.513882	-1.02768
ENSG00000117868	A0FGR8	57488	ESYT2	0.903509	2.38519	1.53353	-0.0224792	-0.788289	-0.472119	1.07111	0.734848	0.0682904	-0.968654	-1.57127	-1.00907	0.971228	0.262664	0.195696	-2.05249	-0.573611	-0.303222	0.299628	0.403169	0.568645	-0.682305	-0.46894	-0.485065	-0.822421	-0.338013	0.000256575	-0.227964	0.766934	0.262232	-1.37858	-0.734006	-0.991479	-1.29427	-0.875017	-1.07862	-0.319868	-0.547738	-0.556722	0.86238	1.35718	0.593201	-0.00478102	0.0895942	-0.299061	2.122
ENSG00000187164	A0MZ66	57698	SHTN1	-0.841779	-0.62008	-1.14	-0.0491462	-0.206173	-0.0587406	-0.984637	-1.4445	-0.966057	1.03385	1.27476	0.771645	-0.256028	-1.06289	-0.498412	1.27522	1.15562	0.979471	-0.835352	-0.76863	-0.92123	1.41189	1.36269	1.38849	-1.21286	-1.56938	-1.03705	0.537614	0.138038	0.321812	-1.34206	-0.832309	-1.3503	1.17176	1.28378	1.12582	-0.786538	-0.594869	-0.600735	1.01067	1.10072	0.923051	-0.701349	-0.545026	-0.323694	1.00884
ENSG00000254726	A1L020	92312	MEX3A	-1.3192	-0.267495	-1.061	0.567786	0.719862	-0.0635549	-0.898314	-0.704042	-2.21191	0.35744	0.907235	-0.31376	-0.761683	-0.336415	-0.730415	0.908702	1.65525	1.63137	-0.00630764	-0.25482	-1.00763	1.23389	1.03121	0.923797	-1.32869	-1.59913	-1.50273	-1.05154	-0.548847	-0.779175	-0.415632	-0.120215	-0.352299	-0.820725	-0.81467	-0.99133	0.745999	-0.105943	0.914886	1.02471	1.31274	0.506928	0.386662	0.354118	1.11621	1.4489
ENSG00000126822	A1L390	26030	PLEKHG3	0.509126	1.66248	1.02286	-0.916097	-1.56478	-0.406664	-0.737982	-0.487165	-0.859167	-0.697483	-1.36553	-1.57008	0.494094	0.0364539	1.0509	-0.556869	-0.552295	-0.14729	0.78745	2.00457	1.09511	0.164692	1.13142	-0.0977648	-0.0325496	0.732476	0.122146	-0.727929	-1.41586	-0.594338	-1.5211	-0.0614665	-1.24672	-0.854417	-0.818651	-1.28903	-0.188831	0.881313	-0.724503	1.21709	1.10886	-0.0221147	1.48085	2.14136	0.185347	0.399456
ENSG00000174705	A1X283	285590	SH3PXD2B	0.895525	1.5652	0.594946	-0.635517	-1.27901	-0.954286	0.986859	1.10645	0.284805	-0.984786	-0.814348	-1.20006	1.26216	0.72311	0.825036	-1.22804	-1.33678	-0.858119	1.29715	1.03538	0.503649	-0.245786	-0.730039	-0.813497	-0.237728	0.00444599	0.525668	-0.840036	-0.317036	-0.644857	0.250158	0.705906	0.400192	0.0753164	-0.434231	0.0827205	1.44028	1.76314	1.77783	-1.81456	-0.471147	-1.65955	-0.754555	0.403671	-0.22005	-0.265348
ENSG00000172264	A1Z1Q3	140733	MACROD2	-0.5882	1.25757	0.509181	1.15803	1.32749	0.241025	-0.532346	-0.0659044	-1.23879	1.40925	1.45658	-0.277848	-1.05039	-0.578729	-0.640859	1.28136	1.16415	0.576	-1.69174	-1.3873	-1.03909	-0.262431	-0.466804	-0.560218	-0.103678	-0.279683	0.0366387	1.5275	1.42405	1.19018	-1.06747	-1.00936	-0.522435	0.825789	0.865896	0.689606	-1.18167	-1.66289	-1.24745	1.16884	0.728669	0.765055	-1.06747	-1.25759	-1.07044	0.686158
ENSG00000173681	A2AJT9	256643	BCLAF3	-2.43776	-1.34892	-1.67666	1.27476	1.01338	-0.328009	-0.380837	-0.211278	-0.342137	0.881678	1.01004	-0.0444227	-0.737396	0.682801	-0.16137	0.818978	0.761556	1.02861	-0.0901319	0.641887	-0.54683	-1.45499	0.931895	0.715146	-1.33282	-2.1805	-1.8496	0.654902	0.10004	-0.154416	-1.17142	-0.144244	-1.38405	0.135376	1.08228	0.147755	-0.122875	0.47243	-0.372266	2.05664	0.88843	0.923319	0.556835	-0.0235596	1.1037	0.051599
ENSG00000162669	A2PYH4	164045	HFM1	0.618342	0.661566	0.813001	-0.849092	-0.823138	-1.12696	0.572967	0.598137	0.188981	-0.750499	-0.758743	-1.42343	1.41811	0.426406	0.925091	-1.34879	-0.494817	-1.01494	1.34108	1.92392	1.23158	-0.790583	-0.292528	-1.04567	0.68418	0.682167	0.407553	-0.133072	1.08284	0.739829	0.517281	0.214553	0.0185852	-2.63562	-1.12871	-2.65723	-0.0636476	0.532382	0.188458	0.0914502	0.637433	-1.21484	0.968512	1.06929	-0.183985	0.182201
ENSG00000121210	A2VDJ0	23240	TMEM131L	0.761954	-0.11942	1.10095	-0.199129	-0.937716	-0.873738	0.0573912	0.543396	2.36363	-0.308603	-0.83614	-1.55378	0.473027	0.14165	1.35529	-0.55613	-1.21896	-1.76104	0.498948	0.870633	1.04493	0.239519	0.0453453	-1.13202	0.63846	-0.108998	-0.161945	-0.655481	-0.997259	-0.729957	0.215847	0.447938	0.302381	-2.02564	-2.46727	-1.00692	1.05072	0.789201	0.86872	-0.334729	-0.346925	-0.363283	1.04891	1.63713	1.15481	-0.248722
ENSG00000257093	A4D1U4	57189	DENND11	1.51854	1.19209	0.947556	-1.14766	-1.53094	-0.314409	-0.00676761	0.971654	0.125169	-0.211972	-0.317123	-0.0708148	3.01997	-0.287536	0.31854	-0.685852	-0.170067	-0.225976	-0.166181	-0.531652	0.302218	-0.214936	-1.40306	-1.11079	1.06309	0.728464	1.00956	-0.726102	-0.873483	-0.574454	0.711317	1.09624	1.06805	-0.150464	0.203722	0.570309	1.60112	0.774049	0.840986	-0.631852	-0.900273	-1.19828	0.499751	0.0144287	-0.0699842	-1.99449
ENSG00000214309	A4D2B0	255374	MBLAC1	-1.07526	-0.161558	-0.251549	0.0916999	-0.737889	-0.353685	-0.234259	-0.85181	-1.69912	0.172185	0.428359	0.97244	-0.547041	-1.68655	-0.399373	1.18094	1.91183	1.94889	-0.675285	-0.486598	-0.309947	1.02191	0.258754	1.4829	-1.57142	-2.37561	0.0777982	0.621654	1.36703	0.885061	-0.887381	-1.29848	-0.293056	0.515863	-0.111819	0.591319	0.242213	-0.111819	-0.974321	-0.406653	1.23414	0.385671	-1.26789	0.110591	0.126806	1.80564
ENSG00000184207	A6NDG6	283871	PGP	2.49626	1.76539	1.31758	-0.262485	0.678582	0.333775	0.19231	0.60901	0.320441	-1.17098	-0.388883	-1.13178	1.3692	-0.824531	0.0541167	-1.30857	-0.760742	-0.712746	-0.0118493	-0.672745	-0.0681818	0.214885	-1.12949	-0.908566	0.344798	0.190017	0.246065	1.31555	2.11224	1.64918	0.766337	-0.218328	-0.174298	-0.0878254	0.144541	-0.212005	-1.41365	-0.277886	-2.17798	-0.205693	0.344798	-0.953105	-0.256502	-0.830966	-1.89799	0.575303
ENSG00000204347	A6NE02	388419	BTBD17	0.753369	2.87858	2.16566	0.186019	-0.522215	0.442465	0.731069	0.630758	1.0685	-0.185768	-1.13247	-0.641721	-0.290047	-0.310007	-0.349795	-0.758261	-1.18297	-0.838037	-0.325651	-0.317443	-0.14638	-1.18403	-0.732845	0.0612273	1.27277	1.30394	1.48674	-0.045705	0.0908307	0.29896	1.17772	1.20497	1.46286	-1.16326	-1.16326	-0.971772	0.664799	0.700322	0.00208232	-1.16326	-1.16326	-0.971772	0.291392	0.376574	-0.30043	-1.06473
ENSG00000166965	A6NED2	91433	RCCD1	1.71275	0.78547	-0.834605	-0.580306	-1.11677	-0.183328	-0.706897	1.4427	1.43498	-1.71427	-1.85139	-0.602751	0.707112	1.28659	0.71514	-1.18203	-0.680045	-0.146877	0.389655	-0.0179675	0.918727	0.120157	-0.265406	0.369365	-0.0420179	1.429	1.37337	-1.00934	0.0358715	0.132591	-0.285819	1.03054	-0.397201	-1.97963	-1.32051	-0.683626	1.549	1.65387	0.796883	-0.518202	0.820389	-0.0693605	-0.977123	0.870023	-0.440906	-1.04173
ENSG00000205903	A6NFI3	100131017	ZNF316	-1.16585	-0.798462	-1.01669	0.998854	2.08832	1.00934	-0.499029	-0.656823	-1.77739	-0.944339	-0.0239259	-1.05643	-0.318096	-0.384953	-1.05096	-0.345762	-0.0181964	0.605677	0.0723062	0.941914	0.626389	1.31576	1.12364	1.27471	-1.60855	-1.00161	-1.56207	0.0873043	0.259104	0.482411	-1.35368	-0.939809	-1.1723	-0.314079	0.173656	-0.860172	0.889627	-0.662507	0.897056	1.70687	0.769568	1.3375	-0.371323	-0.146456	1.06134	0.0829299
ENSG00000122574	A6NGB9	644150	WIPF3	-0.660238	-1.97217	-2.0183	-0.369405	-1.80097	-1.33754	0.501897	0.88478	0.274605	-0.806464	0.074172	0.176805	0.347295	-0.000193343	0.549312	1.0206	0.516796	0.937038	1.23261	-0.663611	0.280496	1.32102	0.532176	0.979294	-1.48261	-1.20861	-2.08039	-1.23808	-1.55218	-1.45931	0.65794	0.851392	-0.0629087	-0.0552727	0.204702	-0.734015	1.02682	1.54497	0.950207	0.567809	0.612142	0.565127	-0.0400987	0.389625	0.714961	0.415369
ENSG00000188573	A6NHQ2	345630	FBLL1	0.461197	0.429181	-0.717795	0.670072	0.205964	0.779848	-1.44908	0.782594	-1.54964	-0.316223	0.519041	0.945365	-0.447125	-1.02732	-1.32961	0.641972	0.903446	0.764392	-1.17399	-0.754173	-1.57022	2.13073	0.221633	0.879747	-1.47866	-1.1729	-1.46763	1.03178	0.996704	1.28715	-1.50098	-1.34128	-1.18496	0.73977	0.258146	0.466109	0.013509	-0.911925	0.305467	0.986929	0.628095	1.21444	-1.08259	-0.535693	0.698658	0.370552
ENSG00000101596	A6NHR9	23347	SMCHD1	0.80124	0.683098	1.60609	-0.593345	-0.213312	-0.540916	0.916295	1.79564	0.10293	-0.383383	-0.559922	-1.78879	0.556999	1.04128	0.537114	-1.05778	-0.847682	-0.986369	1.26539	0.577773	0.55083	-1.07644	-1.46551	-0.921228	1.7712	0.193783	0.919003	-0.0795735	0.57107	0.336643	-0.639691	-1.15291	0.400862	-0.693427	-0.624232	-0.792259	1.40919	0.513346	1.48214	0.962212	-0.0862471	0.330299	-1.1314	1.19588	-1.23056	-2.02067
ENSG00000274070	A6NHX0	729438	CASTOR2	-1.20613	-1.87913	-1.016	1.58504	1.74989	1.54367	-1.00299	-1.47174	-0.499321	0.68748	0.260932	-0.17539	-0.793368	-0.827288	-0.31992	1.07039	-0.187053	0.425481	0.179781	-0.0783791	-0.218155	1.08233	0.0963978	0.993469	-1.44079	-0.397959	-0.6785	0.441077	1.80812	0.925928	-2.22374	-0.632769	-1.83626	0.0431329	-0.390488	0.265414	-0.448186	-0.378075	-0.155114	0.544521	-0.0432964	0.570831	0.927613	0.47013	-0.783016	0.697596
ENSG00000175970	A6NIH7	84747	UNC119B	1.39063	1.82148	0.427914	-0.904239	-1.51765	-0.173188	0.8617	0.966693	0.449843	-1.27486	-1.22796	-0.418071	0.979868	0.521311	0.960084	-1.12895	-0.935214	-0.974923	0.912434	0.539722	1.01724	-0.647435	-0.965714	-0.680707	1.39049	0.940704	1.55728	-0.751517	-0.703739	-0.585003	0.925875	0.891421	1.35289	-1.61527	-1.71689	-1.18686	0.585978	0.456699	0.49721	-0.480565	-1.13333	-0.405919	0.960339	0.733027	0.484177	-0.781237
ENSG00000248485	A6NKN8	654790	PCP4L1	-0.0765597	-0.815585	-0.790644	1.91637	2.5845	2.14637	-0.904453	-1.22207	-0.729768	0.489298	-0.371426	-0.0774523	-0.320685	-0.68761	-0.628426	-0.333499	-0.31562	-0.277597	-0.457783	-0.620413	-0.262742	0.0456397	0.599123	1.11102	-0.372853	0.584878	0.000261376	2.05112	2.58549	2.59891	-0.770079	-0.600357	-0.761707	-0.545143	-0.378521	-0.260679	-0.61465	-0.600357	-0.419127	-0.102129	0.117671	-0.486465	-0.334047	-0.643864	-0.94412	0.312129
ENSG00000134909	A7KAX9	9743	ARHGAP32	-0.553762	-1.40768	-0.0231107	0.873749	0.539747	-0.384791	-0.704069	-1.12431	-2.59762	0.837406	1.10637	0.238629	-0.174812	-0.325232	-0.241748	1.47947	0.64788	2.14253	-0.319842	-0.00868944	-0.924497	0.735952	0.327173	-0.138747	-1.40934	-1.02268	-0.521024	1.18428	1.87859	0.813049	-2.00947	-1.17815	-1.99107	0.468367	-0.157077	-0.239916	0.752242	-0.47934	-0.309823	0.922511	-0.471048	0.570228	0.247791	0.4643	0.219293	0.588752
ENSG00000112320	A7XYQ1	55084	SOBP	-1.41236	-2.87732	-0.922323	0.778145	0.375177	-0.407092	0.201172	-1.07314	1.09652	0.608677	-0.92918	0.242479	-0.325638	0.445059	0.343497	1.9521	0.215239	1.0339	0.46412	0.408542	0.343007	-1.11132	0.419793	0.130962	-0.885667	-0.872127	-1.01984	0.582791	1.09618	1.01288	-1.37523	-1.20556	-0.962961	0.0942119	0.786054	0.443852	-0.804954	-1.19196	-0.982567	1.62046	0.822558	1.57703	-0.488241	-0.485367	-0.711523	0.817573
ENSG00000129292	A8MW92	51105	PHF20L1	-1.10056	-1.32672	-1.36346	-0.225228	-0.349105	-0.217437	-0.675981	-0.984238	-0.752101	0.988351	0.625119	0.554464	-0.657245	-0.582472	-0.434659	1.34473	1.5022	1.48164	-0.629013	-0.501928	-0.82221	1.58364	1.27285	1.26936	-1.29405	-1.54036	-1.60655	-0.219718	-0.465587	-0.32867	-1.42196	-0.329582	-1.25604	-0.0254536	0.265942	0.330175	0.364529	-0.406929	0.576903	1.41258	1.29661	1.42221	-0.557796	-0.446699	0.388128	0.919234
ENSG00000164659	A8MWY0	222223	ELAPOR2	-0.681991	-0.297939	-0.962972	2.24141	1.9016	2.3264	-0.513651	-0.182731	0.0904248	0.840544	0.871911	0.925602	-0.897399	-0.760266	-0.477964	-0.149604	-0.26838	-0.185737	-0.962381	-0.704028	-0.197197	-1.11016	-0.575171	-0.270331	0.713648	0.71445	-0.255457	1.26645	2.65381	1.0879	-0.614606	-0.625286	-0.0139613	-0.675813	-0.655321	-0.335139	1.28918	-0.552088	0.879067	-0.731269	-1.03523	-0.774126	-0.477951	0.162662	1.20913	-1.41968
ENSG00000213965	A8MXV4	390916	NUDT19	0.626029	-0.741128	0.2213	-1.80842	-0.255254	-2.44913	0.109178	0.887681	-1.25737	-1.5164	-0.015958	-0.793868	1.15075	0.153004	0.539748	-0.21795	1.12308	1.06839	0.445035	0.711251	0.667932	0.776185	1.11188	-0.535962	-0.470217	-0.106721	-0.449489	-1.88734	-0.81698	-1.17733	0.0413494	0.565347	0.154366	-1.96946	-1.06337	-1.02923	0.859545	0.880935	-0.0405944	0.352034	-0.0228301	-0.174463	0.94413	0.727626	0.20376	2.09385
ENSG00000284691	B7ZLF3		AC073111.4	-1.99432	-1.40076	-2.17844	0.358244	1.8262	0.133933	0.2916	-1.46576	0.132331	0.905417	-0.127265	0.373599	-0.848954	0.0428737	-0.0915732	1.14882	0.246657	-0.1741	0.23879	1.18441	-0.0634123	-0.351072	1.24921	0.56358	-0.989087	-0.940113	-1.39824	0.856617	0.779433	0.915917	-1.36821	-0.651789	-1.51295	1.38844	1.13742	1.38927	0.0650722	-0.875855	-0.432974	1.01552	0.852103	1.34964	-0.789361	-0.971554	-0.85643	0.151994
ENSG00000188070	C9JLR9	65998	C11orf95	-0.465417	-0.845705	-2.90458	0.77224	0.601588	0.950324	-0.229828	-0.762735	-0.46419	1.07615	-0.385033	0.203169	-0.00881079	-0.451927	-0.928024	0.517294	1.47985	1.04367	-0.90613	-0.484807	-0.678048	1.57122	0.393993	0.905739	-1.41063	-3.04156	-0.977565	0.783249	-0.507956	-0.0970337	0.180991	0.376696	0.54808	1.14234	0.98995	0.963702	-0.335636	-0.980208	0.103915	0.687819	1.00762	0.570424	-0.626588	-1.05365	-0.469298	0.488179
EGFP	EGFP		EGFP	0.484586	0.68649	0.522129	-1.07125	-1.03693	-0.694362	1.29196	0.979893	1.06498	-1.0436	-1.09604	-0.50464	0.819858	0.812806	1.0353	-1.23809	-1.06513	-0.853633	1.17506	1.21112	1.30557	-1.13108	-0.882674	-0.772316	0.950054	1.00486	1.05221	-0.357099	-0.712182	-0.900084	1.0556	0.947205	0.954229	-0.894744	-1.12607	-1.12607	0.88795	0.978296	0.863265	-1.12607	-1.12607	-1.12607	1.15448	1.00914	0.682468	-0.793127
ENSG00000105612	O00115	1777	DNASE2	-0.57595	0.117468	-0.619007	-2.75306	-2.48865	-0.962984	0.331214	0.625324	0.478423	0.37814	0.392753	0.535442	0.298222	-0.313059	0.384622	0.699359	0.767065	0.679737	0.249946	-0.63704	-0.275815	1.87024	0.350354	0.467256	0.466754	0.621094	0.894546	-2.18721	-2.54348	-0.67636	0.596481	0.556554	0.425855	-0.17329	0.10687	0.401773	1.16754	0.713498	1.78958	-0.397045	-0.322495	-0.313342	0.500513	0.140202	0.867167	-0.993719
ENSG00000018510	O00116	8540	AGPS	1.57195	1.91952	2.53414	0.804177	-0.0276042	0.0377846	0.309182	0.630127	-0.0183873	0.166712	0.294488	-0.734746	-0.086882	-0.766393	-0.29761	-0.616432	-0.571526	-0.694647	-0.138749	0.201632	-0.168514	-1.37021	-1.06855	-1.90947	0.702781	0.00846629	0.392369	2.24999	0.681513	1.71093	-1.10987	-0.225252	0.191297	1.14206	1.2866	0.998669	0.1246	-0.898128	-0.725717	0.26765	-0.142316	-0.790327	-1.46909	-0.87691	-1.27621	-0.316681
ENSG00000068796	O00139	3796	KIF2A	-0.185096	-0.988089	-0.290076	-0.642415	0.139503	-0.112052	-1.19115	-1.18506	-1.27509	0.371146	1.515	0.599083	-0.337378	-1.66913	-0.734331	1.82769	1.48242	1.32061	-0.275822	0.250383	-0.81992	1.57413	0.396189	0.229466	-0.285241	-1.35978	-0.849072	1.61873	0.195233	0.62113	-1.62248	-1.23311	-1.30313	0.711817	0.326823	1.36666	0.502439	-1.26593	-0.815803	1.94715	0.076734	0.871321	0.589849	0.552757	-0.974023	-0.164896
ENSG00000107438	O00151	9124	PDLIM1	1.33658	0.621629	1.03419	0.0401069	-2.00062	-1.21121	0.589786	1.04479	0.918979	-0.303422	-1.0924	-0.686832	1.13359	0.479445	0.772109	-0.965354	-0.70226	-0.900757	0.958887	0.939276	0.939195	-0.655319	-1.42953	-0.860866	1.52299	1.41249	0.953721	-0.232158	-1.36895	-0.129987	1.35369	0.816637	1.0282	-1.02689	-1.25904	-1.27527	0.201086	0.957113	0.125799	-0.780499	-0.84001	-0.407082	1.24191	0.981679	-0.351698	-1.00739
ENSG00000097021	O00154	11332	ACOT7	-1.31969	-0.837504	-1.00189	1.15719	1.39316	1.43425	-0.733995	-1.29796	-0.956031	1.2438	0.59879	0.540205	-0.863302	-1.02991	-0.654546	1.21546	0.7569	0.882071	-0.832187	-0.704079	-1.08046	0.752987	0.632648	0.704072	-0.286479	-1.01551	-0.747461	1.68134	1.37255	1.40778	-0.403123	-0.135009	-0.497637	1.01797	0.782225	1.21358	-1.34336	-0.796051	-1.42276	0.349558	0.841641	0.476127	-1.26951	-1.03641	-1.51108	0.348693
ENSG00000116266	O00186	6814	STXBP3	1.38302	1.38013	0.966198	-0.95642	-1.10392	-0.981216	0.810068	1.00104	0.583131	-1.04821	-1.17689	-1.27895	1.19588	0.670029	0.75343	-0.998383	-1.45491	-0.821383	0.53357	0.714487	1.15057	-0.280663	-0.345923	-0.694682	0.636877	0.669365	0.947019	-0.849432	-0.628263	-0.937477	0.735192	1.22544	0.663407	-1.01799	-0.505577	-1.06128	1.35919	1.22131	1.19293	-1.16817	-0.790761	-1.28643	1.0764	0.8665	0.812799	-0.967713
ENSG00000099889	O00192	421	ARVCF	0.983925	0.984753	1.36674	-0.412198	-0.303618	-0.611635	1.94929	0.442674	0.0538869	-1.66188	-1.15377	-0.727152	1.4126	0.197661	0.717182	-1.2816	-1.47754	-0.296385	0.437094	0.929367	0.593073	-1.30122	-0.316249	-0.524998	-0.208201	-0.434894	-1.01473	-0.880773	0.539552	-0.102624	0.135754	0.329245	-0.331845	-2.17313	-1.7419	-1.83682	0.624862	0.383808	0.788979	0.219756	0.76975	1.27563	-0.80018	0.413507	0.948779	0.255409
ENSG00000132842	O00203	8546	AP3B1	1.1095	1.97381	1.5415	-0.979335	-1.234	-1.04462	0.536802	0.857644	0.0333526	-0.800322	-1.10966	-1.19733	0.925027	0.462152	0.691285	-1.25099	-0.935475	-0.573431	0.823575	0.848846	0.891723	-0.353809	-0.277494	-0.938751	1.51963	0.672955	1.84492	-0.78401	-0.539584	-0.706091	0.893424	0.557176	0.989787	-1.10736	-1.52361	-1.00909	0.754377	0.949185	0.674843	-1.25582	-0.291143	-0.98252	0.651104	0.786735	0.69363	-0.708002
ENSG00000197170	O00232	5718	PSMD12	-2.12514	-0.745115	-1.24384	0.156412	2.33377	2.05381	-0.112337	-0.563999	-0.608063	1.67459	0.421516	0.236509	-1.31262	-0.240087	-0.398498	0.706951	-0.0527647	-0.212344	-0.263811	-0.302419	-0.0457763	-0.0686793	0.507128	0.204807	-0.268077	-0.764225	-0.697099	0.835534	0.299647	0.206121	-0.346037	-0.0108664	-0.0703849	-1.9494	-2.05553	-0.0715806	1.80159	0.324524	1.87583	-1.00927	-0.034612	-0.846723	0.34256	0.876277	1.08756	0.826098
ENSG00000177556	O00244	475	ATOX1	-1.92624	-0.422323	-0.979924	1.1483	-0.0262891	2.27629	-0.945982	-1.54161	1.0056	1.0552	1.27303	0.593585	-0.816559	-0.194236	-0.82539	0.568623	0.420692	-0.086048	-1.17215	-0.427631	-0.0542248	-0.144808	0.437582	0.784516	-0.768323	-0.823068	-0.198036	1.3555	0.731937	1.24225	0.0517448	-0.543759	-0.0530597	1.66459	1.47012	1.24971	-1.6889	-1.00953	-1.30252	0.148566	0.87569	0.450901	0.278878	-0.701415	-1.93789	-0.235861
ENSG00000141582	O00257	8535	CBX4	-1.03205	-1.9086	-2.04593	0.351952	-0.0512901	0.0662757	-0.324775	-0.495074	-0.180672	0.216896	1.35413	0.0801374	-0.0322468	-0.520232	-0.600248	1.73208	1.38274	1.25612	-0.0163761	-0.548428	-1.11983	1.45003	0.0236479	0.961744	-0.899403	-0.219245	-1.14039	-1.48883	-1.27609	0.178641	-0.570747	0.0951388	-0.610384	-0.916825	-0.658197	-1.4724	1.31925	-0.123141	1.59216	0.362206	-0.579857	0.451015	0.8541	0.401026	1.88141	0.422615
ENSG00000101856	O00264	10857	PGRMC1	1.50886	2.49697	1.85624	0.728697	0.582744	0.497043	-0.252431	0.786459	0.125957	-0.162173	0.310952	-0.431276	-0.0698274	-1.08066	-0.92008	-0.387517	-0.102813	-0.262056	-1.26372	-1.04562	-1.62233	0.267969	-0.612748	-0.948643	0.881122	0.217291	1.28566	2.14634	1.83122	1.67125	0.0376964	0.184493	0.431167	0.0373917	-0.232091	0.0497089	-1.42157	-0.402176	-1.39909	-0.370559	-0.405823	-0.24085	-0.703597	-1.02109	-1.79332	-0.143167
ENSG00000127946	O00291	3092	HIP1	-0.436784	1.15312	0.82739	-0.561609	-0.263589	-0.196211	0.286759	0.127557	0.04441	-0.182699	-0.419584	-0.137879	0.0158376	0.366517	0.716539	-1.20079	-0.954021	-0.273969	1.25938	2.38971	1.49715	-2.48929	-0.826402	-0.741532	0.591148	0.567601	1.36605	0.401556	0.691778	0.618596	0.187789	0.236523	0.685819	0.075377	-0.344836	-0.012797	0.0812578	-0.423711	-0.226462	-1.13058	-0.77251	-1.1769	1.45712	2.26779	-0.569896	-2.08022
ENSG00000213719	O00299	1192	CLIC1	0.792229	1.64196	1.23542	-1.70768	-1.92957	-1.31148	0.508779	0.467289	0.855497	-0.668488	-0.547581	-1.0493	0.605607	0.600443	0.856276	-1.10846	-0.303563	-0.411168	0.717803	0.962628	1.1203	-0.984048	-0.343721	0.000830006	1.03353	1.26437	1.2394	-1.91986	-1.74603	-1.59926	1.04373	0.952611	0.945565	-0.551371	-0.873053	-0.401193	0.372802	1.24884	0.235883	-0.713441	0.0210575	-0.67292	0.601199	0.902335	0.272749	-0.528709
ENSG00000175390	O00303	8665	EIF3F	2.08668	1.3689	1.89056	-1.91281	0.202514	-0.617348	-0.409153	0.481364	-0.343504	-1.12579	0.294407	-0.464924	0.435679	-0.4484	0.153032	1.28073	-0.00585898	0.319336	0.370219	-0.277032	-0.486814	0.171841	-1.50276	-1.46087	1.02889	2.47129	1.41491	-1.27557	-0.351818	-1.1584	0.0607501	0.0327425	-0.0618783	-0.899503	-0.755603	-1.73449	0.929972	-0.0233415	0.737338	-0.22014	-0.343723	0.0910403	0.627858	0.101083	1.52776	-0.764646
ENSG00000110435	O00330	8050	PDHX	-0.809547	-0.830405	-1.06229	0.721949	0.404186	0.23202	0.538091	-0.160484	-0.908822	1.79084	1.28889	0.546219	-0.227261	-1.37227	-0.831321	2.21655	0.577987	0.548994	-1.10832	-1.11333	-1.48149	0.689697	0.405369	-0.0552549	-1.68062	-1.32723	-2.18439	0.874909	0.273202	1.17853	-1.18095	-0.315713	-1.61321	0.707796	1.00737	0.604656	0.752409	-0.373206	-0.368069	0.910098	1.11537	0.946043	-0.572276	-0.118777	0.409673	0.673295
ENSG00000104671	O00399	10671	DCTN6	-1.95333	0.173761	-1.33675	1.9438	0.989958	0.88261	-0.830372	-0.405819	-0.708789	1.07285	1.19716	0.633685	-1.27643	-1.06493	-0.614298	0.419824	0.947517	0.815075	-0.759528	-0.762785	-0.509275	-0.313417	0.613089	0.846409	-1.95719	-1.40818	-2.04062	0.638991	0.424307	0.57858	-1.37582	-0.810053	-1.01204	0.977527	1.32069	1.03796	-0.147208	-0.472017	-0.219482	0.443546	0.448873	0.288987	-0.155656	-0.164124	0.438212	1.56097
ENSG00000106299	O00401	8976	WASL	0.959989	-0.643715	0.0533009	-0.876389	-0.950472	-2.05211	0.549304	0.627706	0.0976463	-0.976901	-0.691096	-1.279	1.9472	1.09069	0.566906	0.698519	-1.33109	0.0107125	1.85003	0.049809	0.273367	0.697435	0.00407131	-0.675904	-0.571139	-0.846729	0.667762	-0.857301	-1.07866	-1.04817	0.289144	1.42171	0.366144	-0.86577	-1.26445	-0.951021	2.37676	0.528136	1.97943	0.254852	-0.424304	-0.089889	0.701819	0.278333	0.321478	0.4123
ENSG00000186642	O00408	5138	PDE2A	-0.494624	0.117409	0.462291	-0.725716	-1.06555	-0.898309	-0.447754	0.0633077	-1.14357	1.33763	2.22033	0.614797	-0.949328	-0.300999	-0.940893	0.61837	0.913467	0.498589	-1.14561	-0.829688	-1.22482	1.8501	0.960977	0.509589	-1.10744	-1.17687	-0.318975	0.542401	-1.03994	-0.0526767	-0.913702	-0.437031	-0.181176	2.04189	1.89398	2.13572	-0.556383	-0.761768	-0.349125	0.734353	0.63403	0.543526	-1.41192	-0.728785	-0.256225	-0.319745
ENSG00000065150	O00410	3843	IPO5	1.17193	1.64607	0.978918	-0.86152	-0.920015	-0.37624	1.12697	1.28424	1.02806	-0.93146	-0.891113	-1.2392	0.805019	0.182953	0.764596	-1.10655	-0.929674	-1.28165	0.689461	0.620308	0.897229	-0.80949	-1.04253	-0.806317	1.46625	1.59573	2.02621	-1.39708	-1.5921	-1.36147	0.87098	0.761407	1.13413	-0.962249	-0.776632	-0.842678	0.579967	0.302005	-0.11959	-0.217366	-0.808257	-0.389521	0.502675	0.851599	-0.221847	-0.439991
ENSG00000066629	O00423	2009	EML1	0.408874	0.051335	0.554106	-1.1942	-1.79605	-1.28876	-0.440947	-0.00170109	-0.590197	1.11805	2.27634	1.05737	0.18593	-0.332734	-0.0649807	1.51821	0.765229	0.660758	-1.24979	-1.63334	-0.357664	0.51427	-0.135679	-0.0244392	0.00677291	0.0223923	0.378591	-1.11726	-2.10557	-1.23826	-0.583506	-0.56847	-0.0773611	1.72675	2.01987	1.80738	-0.102439	-0.633098	-0.256378	1.21371	0.61665	0.945628	-0.939074	-0.627532	-0.28873	-0.137355
ENSG00000136231	O00425	10643	IGF2BP3	0.957109	1.359	1.00422	0.952823	1.93121	1.34397	0.604884	0.756734	0.47755	0.27284	0.208203	-0.226021	-0.278608	-0.135622	-0.0276191	-0.456764	-0.823242	-0.847035	-0.573414	-0.698567	-0.936453	-1.80732	-1.29086	-1.76702	1.54647	0.912335	1.03915	-1.53994	-0.946692	-0.972142	1.14189	0.869163	1.24018	-1.36134	-0.895466	-0.745426	0.711911	0.820062	1.61604	-0.573243	-0.623903	-0.705556	0.0730789	0.00880579	0.629323	-1.08343
ENSG00000087470	O00429	10059	DNM1L	-1.01436	-0.283317	-0.732763	-0.099211	0.112099	1.06057	-1.16246	-0.8108	-0.810139	0.855186	1.37428	0.904905	-1.14136	-1.38532	-0.79694	1.20251	1.21812	0.775891	-0.917821	-0.786071	-0.891355	1.7939	0.588549	0.945899	-0.540914	-1.87155	-1.44359	0.759315	0.93704	1.29647	-1.28263	-1.64166	-1.03258	0.612043	0.927145	0.538018	0.36547	-0.975278	-0.663539	1.31093	0.537801	0.851962	-0.520029	-0.225112	-0.492532	1.03953
ENSG00000137996	O00442	8634	RTCA	-1.32037	-0.724091	-1.1966	0.693043	1.52171	1.07648	-0.551912	-1.02686	-1.45302	1.26714	0.881296	0.562538	-0.867374	-0.505129	-0.870703	1.22202	0.833221	0.823468	-0.921228	-0.922575	-0.878238	0.753232	0.469925	1.13403	0.0251036	-1.4844	-1.61479	1.23118	2.41134	1.10851	-0.7478	-0.0214933	-1.22399	0.578856	0.97735	1.07717	-0.100786	-1.23837	-0.0271147	1.11669	-0.285008	0.446164	-0.769562	-0.992662	-0.320707	0.197348
ENSG00000011405	O00443	5286	PIK3C2A	0.460359	1.15162	0.64407	-1.42432	-1.65304	-0.635663	1.1762	1.28305	0.793958	-1.38571	-1.23025	-0.765483	0.874629	1.04346	0.938044	-1.13162	-0.817247	-0.610837	0.97731	0.804218	0.909406	-0.410762	-0.66544	-0.325948	0.463689	0.398311	2.25881	-0.860463	-0.332747	-0.307726	0.24352	0.191448	0.327372	-2.24492	-1.94846	-1.20023	1.35823	0.6428	1.27196	-0.0513942	-0.400389	-0.909878	0.438483	-0.0468708	0.702547	0.0464004
ENSG00000105647	O00459	5296	PIK3R2	-2.33491	-1.2621	-0.878453	0.452635	0.340912	1.11006	-0.158176	-0.790468	0.414407	1.33835	1.00128	1.11621	-1.31128	-0.0922866	-0.0788687	1.32233	0.515601	0.720852	-0.289054	-0.337646	0.010104	-1.90107	0.329786	0.761789	-1.68905	-1.7713	-0.720265	-0.104142	-0.749414	-0.684128	0.123263	0.521012	0.741421	1.16368	1.46181	1.44507	-0.949058	-0.0571281	-0.588992	1.3603	0.698392	0.951625	-0.984731	-0.475571	-1.2439	-0.23035
ENSG00000173905	O00461	27333	GOLIM4	0.429441	1.78214	1.96501	-0.604063	-1.55378	-1.36334	0.867058	0.892174	-0.0463104	-0.640362	-0.966535	-1.93646	0.835082	0.288175	0.70767	-0.997782	-0.196114	-0.388443	0.736352	0.370432	0.757046	0.254346	-0.63445	-0.557277	0.496004	0.270543	0.432234	-1.47883	-1.35868	-1.59196	0.731472	0.665005	0.613272	-1.44928	-1.50043	-1.35179	1.23569	1.07188	1.22191	-0.528162	-0.273793	-0.556675	1.12843	1.14957	0.934822	0.252369
ENSG00000188157	O00468	375790	AGRN	1.5199	2.26546	1.02561	-1.17928	-1.00643	-0.651238	0.47758	0.26972	0.316726	-2.05024	-0.92583	-0.0897063	0.741716	0.188757	0.114729	-1.54309	-0.304099	0.495713	0.107845	-0.515828	-0.115743	1.53693	-0.394301	-0.284897	-0.283822	0.225743	0.228941	-0.250976	-0.0145448	0.0756111	-0.278328	-0.271319	-0.467248	0.604485	0.933872	0.306967	-0.822692	-0.630183	-0.682484	0.837768	1.82156	0.973599	-3.08608	-1.35637	-0.179892	-0.178407
ENSG00000152952	O00469	5352	PLOD2	1.8984	1.46239	1.26355	-0.596948	-0.850154	-0.441114	-0.567945	0.234826	0.0348257	-1.15038	-1.411	-1.29377	1.06257	1.62046	0.829616	-1.14393	-0.617612	-0.866158	0.387582	0.447398	1.051	-0.653818	-0.281317	-0.418465	1.31515	1.52061	1.4436	-0.880542	0.335758	0.248233	0.269093	0.671444	0.685084	-1.13886	-1.51561	-1.29957	0.273302	0.774227	-0.0131402	-0.89754	-0.201407	-1.73393	0.851218	1.39129	0.233085	-0.948893
ENSG00000070367	O00471	10640	EXOC5	-0.767773	-0.813719	-0.694578	-0.074893	0.845406	1.23783	-0.938925	-1.24526	-1.09036	1.15708	1.36316	-0.225727	-0.21158	-2.0003	-0.465061	0.0669742	-0.422226	0.294718	0.184769	-0.141132	-0.202265	2.42982	0.588294	1.12576	-0.649695	-1.22096	-2.0346	1.59389	0.351231	1.55225	-1.11183	-1.56838	-0.733208	0.299718	-0.239315	1.19987	0.612455	0.775888	0.516472	1.73047	-0.463741	0.0446067	0.691672	0.386894	-0.496377	-0.770199
ENSG00000189043	O00483	4697	NDUFA4	-0.121804	0.603734	1.33334	0.0516592	0.708636	-0.371119	-0.85051	-1.02326	-1.5	-0.967588	-1.49057	-2.29353	0.578556	-0.726721	-0.350425	-0.0915304	0.425258	0.419625	0.911952	1.34076	0.526673	1.45655	1.13915	0.291148	-0.0869568	-0.476895	-0.481635	1.20429	1.71463	1.18401	0.316555	0.165895	0.0103918	1.01858	1.53534	1.3631	-1.75439	-0.545753	-1.22615	0.276585	0.468866	0.0929099	-0.0877072	-0.213155	-2.00075	-0.604592
ENSG00000136717	O00499	274	BIN1	0.691573	-0.664929	-0.883638	1.85619	2.16718	1.96062	-0.885361	-1.41689	-0.554267	1.03183	-0.0623807	-0.155933	0.53551	-0.640243	0.109474	-0.638287	-1.39612	-0.893696	-0.724537	0.0131447	-0.198237	-0.303994	0.374931	0.678064	-0.806033	-0.453633	-0.723819	1.39509	1.57262	1.59277	-1.14308	-1.16084	-1.21729	1.13215	1.17077	0.997569	-1.10875	-0.998163	-0.948039	0.688018	0.529542	0.658015	-0.959059	-0.685386	-0.789178	0.277423
ENSG00000117480	O00519	2166	FAAH	-0.379145	-0.308869	-0.410253	0.440791	0.641873	-0.538854	-1.02756	-0.379597	-1.44442	0.354627	1.54816	0.584903	-0.348556	-1.07774	-0.51998	1.67132	1.45703	1.21613	-1.29523	-1.18353	-1.4729	1.23886	0.780192	0.452751	-0.841462	-1.37112	-0.525975	0.485843	0.889956	0.740116	-1.0864	-0.370088	-0.32351	1.51279	0.86595	0.856853	-1.00234	-0.291705	-0.92522	1.18515	0.962298	1.05617	-2.19811	-0.92522	-0.807418	0.420191
ENSG00000134121	O00533	10752	CHL1	-0.0229723	-0.686909	-0.898619	-0.0470206	1.90199	0.900543	-0.825731	-1.65935	-1.11887	-0.292592	0.51345	-0.0795308	-0.147323	-1.35346	-0.545931	0.811377	1.49017	2.12412	-0.396159	-0.651068	-0.936684	0.652409	0.724239	0.543918	-1.04823	-1.23133	-0.694412	0.445546	1.37355	0.980565	-0.935676	-0.964652	-0.921092	-0.619828	0.250136	-0.377094	-0.88942	-0.882816	-0.250342	1.82533	1.22732	1.66412	-0.471928	-1.06201	-0.349113	0.935084
ENSG00000110002	O00534	4013	VWA5A	0.320219	0.618798	-0.0885923	2.39113	2.472	1.82066	-0.269638	-0.086077	-0.48505	-0.703415	-0.360304	-0.418916	0.462558	0.36558	-0.273023	-0.96558	-1.10194	-1.05497	0.0634893	-0.0891319	-0.0678752	-1.16196	-0.350112	-1.03784	0.48194	0.0633489	0.333269	1.59036	1.53918	1.51774	0.517822	0.390462	0.246481	-1.00819	-1.06822	-0.78032	0.729204	0.791053	0.915661	-1.47395	-0.186872	-1.18744	0.0792726	-0.0849716	0.732154	-0.908595
ENSG00000100029	O00541	23481	PES1	1.45052	1.83943	1.43926	-1.34375	-1.99058	-1.17382	0.817189	1.32749	0.30083	-0.680783	-0.645161	-0.707048	0.20281	-0.497324	-0.0799121	0.70139	1.40251	-0.120111	0.159036	-0.523043	-0.146543	-0.171418	-0.951747	-0.609233	0.398486	-0.302208	-0.0320573	0.212693	-1.46698	-1.53875	-0.974044	-0.6851	0.244518	-0.467529	-1.08527	0.568354	-0.332108	-2.00449	0.534767	0.575221	-0.288306	1.24617	0.0920421	1.2031	1.11289	1.39973
ENSG00000147654	O00559	9166	EBAG9	-1.75726	-0.987443	-0.713532	0.965006	1.23428	0.768954	-0.470538	-0.773963	-1.47004	1.10146	0.728899	0.226825	-0.727531	-0.570864	-0.461398	1.1858	1.22494	1.56173	-0.892525	-0.514101	-1.03039	-0.522901	0.94481	0.94978	0.440306	-1.22476	-0.215652	0.585276	-0.478464	-1.119	-1.18856	-1.1863	-0.209848	-2.08359	-0.0683265	-1.08561	1.53883	0.0534323	-0.582199	1.95098	-0.0212194	0.250715	1.05543	-0.0287331	0.991728	0.988526
ENSG00000137575	O00560	6386	SDCBP	-0.218759	0.266897	0.00190807	-1.40501	-1.96357	-1.81643	0.709226	-0.153585	-0.106833	-0.774074	-0.98759	-1.00565	0.155081	1.36679	0.413553	-0.34191	-0.263227	-0.23942	0.773356	0.591351	0.377572	1.52496	1.30813	1.78724	-0.470018	-0.472985	-0.610767	-1.73753	-2.16262	-1.79346	0.0703743	0.418873	-0.218851	-0.635676	-0.404284	-0.545379	1.14226	1.19427	1.00735	-0.0462599	0.279332	-0.11187	0.223533	0.945216	1.02992	1.01132
ENSG00000124383	O00566	10199	MPHOSPH10	1.13992	-0.186153	0.137698	-0.568318	-1.55382	-1.19231	2.002	-0.381676	1.67827	1.21647	-1.23556	0.176718	-0.0126375	0.939569	1.0045	1.02866	-0.0414914	0.303457	-0.724031	-0.0861232	-0.30985	-1.34451	-1.09337	-0.897419	-0.849052	-1.80914	-1.36826	-0.919254	-0.787233	-1.21616	-0.404699	-0.663448	-0.789816	-0.082116	-0.49614	-0.243847	1.00614	-0.381459	0.745652	1.27884	1.15787	0.850529	-0.0364052	-0.234367	1.02211	1.53235
ENSG00000182968	O00570	6656	SOX1	1.02207	0.478898	0.525338	-0.66629	-1.29368	-0.869345	0.98164	1.5171	0.230407	-0.674118	-0.993016	-0.904786	1.07451	1.39288	0.17411	-1.45558	-0.852137	0.339655	0.93001	1.68816	0.206175	-0.822567	-1.47342	-0.556014	1.00322	0.868851	0.949205	-0.628224	-1.41682	-0.887823	1.10788	1.06392	1.01974	-1.27967	-1.50426	-0.960444	0.96148	1.09902	0.908944	-0.866068	-0.965428	-0.489036	0.867609	0.932709	0.646108	-0.789615
ENSG00000215301	O00571	1654	DDX3X	0.0673517	0.677291	2.31159	-1.00658	0.343882	0.35983	0.769697	-0.996934	0.17348	-0.805909	-2.42799	-1.24306	-0.0736838	-0.147657	1.21914	0.129733	-1.05785	0.488678	0.931552	0.707642	1.07579	-0.67073	-0.516652	-0.308597	0.26586	0.597511	-0.280595	-0.870673	-0.620159	-0.489737	-0.329391	-0.00762083	0.394168	-2.4199	-2.18798	-1.60421	1.30812	0.912122	0.881951	1.00103	-0.0218798	-0.513639	0.961318	0.73572	0.546267	1.00172
ENSG00000128567	O00592	5420	PODXL	1.10758	2.97708	1.46247	-0.36284	-1.02095	0.702112	0.706036	0.585042	0.186504	-1.34283	-1.15866	-0.742865	1.01793	-0.16173	0.401967	-1.17947	-0.486145	-0.273819	-0.367985	-0.775278	-0.230006	-0.417296	-0.785164	0.158324	-0.164269	-0.166311	1.25075	0.0906652	0.423818	0.303021	0.00961634	-0.361123	1.61372	-0.750284	-2.53399	-1.3189	-0.111715	-0.374332	-0.405406	-0.0680333	-0.594986	-0.119734	-0.566395	-1.18739	0.629076	1.95962
ENSG00000087842	O00625	8544	PIR	-0.704814	0.19373	-0.135659	-1.10475	-1.23308	-1.61703	0.305435	1.00606	0.408923	-0.548837	-0.612716	-1.48386	1.30773	1.93082	1.21055	-0.715749	-0.347045	-0.693877	1.75626	0.581754	1.14793	-0.0782583	-0.211427	-0.362081	0.357293	0.321902	0.53416	-0.301731	-0.971133	-1.07989	0.680786	0.718828	0.344068	-0.353356	-0.291421	0.0960218	1.5518	1.89819	1.67828	-1.59683	-0.783388	-1.61288	0.293495	0.482897	0.887439	-0.376995
ENSG00000112343	O00635	10475	TRIM38	1.23852	1.17517	1.28819	-0.96075	-1.17018	-0.627469	0.935766	1.387	0.745446	-1.39848	-0.716105	-0.824198	0.860817	0.801797	0.750553	-1.00332	-0.865098	-1.06609	1.05631	0.601722	0.558547	-0.733941	-1.02854	-1.00567	0.914766	0.664691	-0.359774	1.16251	-0.887173	-0.0999399	-0.887173	-0.359774	-0.887173	-0.887173	-0.359774	-0.359774	-0.359774	-0.359774	-0.887173	0.664691	1.40798	-0.359774	-0.0999399	-0.887173	-0.887173	3.06567
ENSG00000147862	O00712	4781	NFIB	-1.01613	-1.5838	-1.39519	-1.26477	-2.09043	-1.21442	-0.220893	-0.017625	-0.381872	1.02916	1.76397	1.11168	-0.152317	0.0811614	-0.148962	0.506335	0.996851	1.02293	0.403625	0.504477	-0.0173056	1.09256	0.584369	0.406596	-0.887299	-1.36405	-1.16621	-0.0719562	-3.09171	-0.527552	0.0135655	0.328804	-0.0345437	1.59718	1.72823	1.60267	0.174939	-0.0479147	-0.0245625	0.586894	0.646927	0.232851	-0.113538	0.0750479	-0.0344193	0.0424381
ENSG00000119414	O00743	5537	PPP6C	0.41519	0.952566	0.838179	-0.85744	-0.496403	0.555944	0.918223	0.932467	1.67466	0.119142	-0.652594	-0.753825	0.640247	0.721175	0.412967	-0.558329	-1.58814	-1.68588	0.641576	0.839987	0.989316	-1.50538	-1.31031	-1.24333	-0.375285	-2.13799	-1.22164	-0.310778	0.907885	-0.209213	-1.08319	-0.381364	-1.01612	-1.27689	-0.41184	0.120704	1.19222	-0.19539	0.0373246	0.670522	0.175106	0.175106	2.36521	0.368532	0.623442	0.870862
ENSG00000175063	O00762	11065	UBE2C	0.803118	0.679334	0.877395	0.41398	-0.741479	-0.971933	1.14413	0.692259	1.2817	-1.69178	-0.798787	-0.797856	0.629255	0.597619	1.05824	-1.77953	-0.699966	-0.754363	0.982974	1.02083	0.938563	-1.2061	-0.696853	-0.980749	1.09045	1.31928	1.0694	-0.457673	-1.53338	-0.707041	1.01149	0.861724	1.02223	-1.09632	-1.37987	-0.460178	0.677532	1.08285	0.602893	-0.875308	-0.869686	-0.913434	1.03376	1.0161	0.475459	-0.899912
ENSG00000099194	O00767	6319	SCD	1.72575	0.999721	1.98261	0.405971	-0.960398	-0.0911065	1.58889	0.528402	1.01512	0.19814	-0.380372	-0.76757	0.292918	0.727287	0.116939	-0.0831191	-0.591762	-0.429846	-0.184264	-0.819589	-0.803577	-1.21068	-1.84101	-1.41846	1.48876	1.01751	1.33227	0.719297	-0.439469	0.411192	1.17145	1.16881	1.38483	0.339874	0.0983472	0.623919	-0.370319	0.521604	-0.745755	-0.348747	-0.627732	-0.576423	-0.721166	-0.58874	-0.969407	-1.68092
ENSG00000170579	O14490	9229	DLGAP1	-1.44445	-1.76217	-2.54911	0.254413	0.269239	0.180595	-0.430883	-0.516753	-0.908354	0.859261	1.16848	0.712121	-0.33119	0.413179	-0.0218787	1.02634	0.895299	0.800252	0.0725388	-0.197003	-1.28387	1.18344	0.598015	1.0125	-2.54561	-2.28878	-0.876191	0.297391	-0.0829168	-0.111689	-1.35775	-0.361299	-0.634507	0.514286	0.622604	0.475744	0.810256	-0.158802	0.683826	1.03495	0.826943	1.10158	-0.779778	-0.215945	0.787456	0.557288
ENSG00000162407	O14495	8613	PLPP3	1.52211	2.0198	1.17922	-1.15707	-0.755038	-0.722071	0.430083	1.80024	0.240746	-1.55733	-0.286098	-0.581215	1.31219	0.00751046	0.575038	-1.33577	-0.408615	-0.638943	0.155198	-0.534494	0.682984	-0.656671	-0.653652	-0.638151	0.901012	0.91928	0.988754	-0.946899	-0.678532	-0.679771	1.14845	1.1222	1.05447	-1.1386	-1.13595	-0.651902	0.999708	1.25377	0.828783	-1.32722	-0.820184	-1.07086	0.916654	0.815752	0.509836	-0.625264
ENSG00000117713	O14497	8289	ARID1A	2.38594	0.609463	1.38708	1.05565	0.665881	-0.72073	0.660564	1.08551	-0.673897	-0.0529011	0.23151	-1.51687	0.645991	-0.777604	-0.0711934	-0.326681	-0.632133	-0.0485781	0.352772	0.332265	-0.533555	-0.557215	-1.66913	-1.83215	-0.33388	-0.833173	0.0657843	0.301462	0.557711	-0.262341	0.409283	0.0865238	0.108209	0.184747	-0.192279	-0.313393	2.03768	1.59382	0.680816	-0.463843	0.246178	-0.89452	0.972185	1.70585	-0.581725	-1.22098
ENSG00000111328	O14519	8099	CDK2AP1	0.434745	-1.0762	1.70553	-0.331543	-1.7367	-2.26642	0.695262	-0.41284	-0.865402	0.219416	-0.108249	-0.949292	0.463081	1.07621	0.34624	0.666369	-0.532284	1.47818	0.946088	1.34317	-0.212896	0.113418	-0.0187566	-0.977143	0.394751	-0.0698697	0.418046	-1.83555	-1.88964	-1.73692	0.827833	1.01617	0.838938	-0.841003	-0.61794	-0.769842	0.78134	1.01611	0.665376	-0.673542	-0.410469	-0.286311	1.65869	1.4782	0.778835	-0.309757
ENSG00000204370	O14521	6392	SDHD	1.078	0.74827	1.0917	-1.02405	-0.864669	-2.0534	-0.0502623	1.6318	-1.87308	-0.29059	1.09156	-0.621354	0.487534	-0.635581	-0.567951	0.665755	1.15082	0.625411	-0.087078	-0.131013	-0.816179	1.1697	0.266824	-0.992154	1.43681	0.575653	0.849397	-0.907461	-1.34558	-0.713389	1.31035	1.50232	0.664092	-1.34072	-1.5391	-1.04025	0.808655	0.848733	0.943154	-0.673767	-0.608678	-1.22599	0.703024	0.765411	0.515717	-0.438078
ENSG00000172375	O14523	9854	C2CD2L	-1.09283	-0.846469	-1.24555	1.11198	0.661236	0.259617	-0.795872	-0.82809	-1.18428	0.985002	1.94192	0.844318	-0.854942	-0.981031	-0.881766	1.34812	1.19104	0.957867	-0.493699	-0.802128	-1.00217	0.779868	0.646039	0.281823	-0.820793	-1.71158	-1.8867	0.765407	0.846423	0.726483	-0.987764	-0.85469	-1.14304	1.17659	1.37341	1.21706	-0.116559	-1.07256	-0.249416	0.777039	0.83242	0.949983	-0.914104	-0.812417	-0.0321981	0.44873
ENSG00000166881	O14524	23306	NEMP1	0.457156	0.994011	1.40558	-1.25057	-1.31008	-0.96347	0.840789	1.60994	0.468613	-0.906564	-0.801499	-0.592591	0.778413	1.28459	0.875194	-1.06744	-0.427108	-0.240354	0.806305	0.942469	0.410693	-1.65114	-0.648065	-1.01487	1.04195	0.949801	1.05539	-1.19781	-1.52609	-1.0211	1.03982	0.997444	1.03577	-1.37641	-1.09871	-1.22446	0.924012	1.21923	0.625229	-0.432987	-0.880382	-0.615523	0.986034	0.943863	0.397757	-0.536952
ENSG00000111249	O14529	23316	CUX2	-0.243416	0.165923	-0.51924	-0.756088	-0.277783	-0.616271	-0.95421	-0.809631	-0.852549	-1.03329	-0.812087	-0.960333	0.0332382	-0.239015	-0.0611785	0.570079	1.12539	1.42657	-0.283188	-0.556689	-0.233519	2.7243	1.34121	1.82178	-0.554546	-0.645825	-0.370482	-0.502949	-0.105851	-0.284211	-0.716683	-0.486071	-0.95861	-1.56272	-1.6159	-1.5249	0.395721	-0.0659671	0.418849	1.34559	1.31569	1.25915	-0.344868	-0.117645	0.638908	1.33506
ENSG00000151640	O14531	10570	DPYSL4	-0.297088	0.320378	-0.719132	0.478484	1.63417	0.724475	-1.21597	-1.02539	-1.6616	-0.379933	-0.160215	-0.660404	-0.351332	-0.990449	-0.933402	0.388755	0.665331	0.270749	-0.190126	-0.546519	-0.454383	2.51482	1.05851	1.53026	0.423384	-0.0776701	-0.198538	1.21191	1.92727	1.71511	0.43334	0.52499	0.388766	-0.860247	-1.19226	-1.00157	-0.892566	-0.97357	-0.945677	-1.04819	1.39176	-1.88798	0.56095	0.366045	-0.510533	0.374072
ENSG00000115944	O14548	9167	COX7A2L	-0.0457698	0.660888	-0.119756	1.86691	-0.329819	0.461437	-0.992905	-0.82488	-1.23239	0.141541	-0.396217	-0.701401	-0.523548	-2.25645	-1.04853	1.14346	1.59721	0.495121	-0.457285	-0.502527	-0.259519	1.31025	1.15312	0.861043	-0.844353	0.0774114	-1.09021	0.640878	1.50387	1.4299	-0.434962	-0.446907	-0.92884	1.87801	1.58235	1.37568	-0.442561	-1.59667	0.0384855	-0.473584	0.0829546	0.549123	-1.54498	-1.06345	0.336704	-0.156857
ENSG00000004779	O14561	4706	NDUFAB1	-0.924574	-1.26935	-1.03894	0.384386	-0.121124	0.0185074	0.877824	-0.376229	-0.629686	1.46799	0.93003	0.872217	1.69346	-0.922104	-0.817556	1.96396	0.273926	0.174059	-1.52836	-0.850277	-0.936273	1.3242	-0.329201	-0.236882	-0.856626	0.0112871	-0.143252	2.0332	0.393001	1.25722	-0.0755962	0.137339	0.136306	0.908199	1.40743	1.67062	-2.2959	-0.341811	-1.69449	-0.384529	0.346241	-0.29608	-0.242934	-0.776601	-0.91977	-0.16898
ENSG00000158560	O14576	1780	DYNC1I1	-0.638768	-0.67293	-0.49074	0.352414	0.833768	-0.404455	-0.950898	-0.537185	-0.948524	0.664212	1.96994	0.371728	-0.779738	-1.12183	-0.717439	2.26559	1.32035	1.42659	-0.947275	-0.990589	-0.7933	0.749394	0.0191572	0.0205304	-1.04934	-0.992087	-1.2162	0.78444	1.01923	0.792341	-1.53271	-1.10671	-0.961477	1.20113	1.57164	1.0969	-1.26231	-0.746677	-0.964825	1.1018	0.829123	1.08764	-0.297998	-0.163558	-0.696099	0.543893
ENSG00000122966	O14578	11113	CIT	1.09311	1.06981	1.01702	-0.614213	-0.785659	-0.886295	-0.578892	1.01736	-0.266857	-1.09681	-1.00704	-0.791698	0.819212	0.559633	0.622697	-1.18843	-0.650616	-0.6869	2.1022	0.6287	1.75303	-1.16088	-0.186558	-0.781914	0.830161	0.846533	1.10123	0.425883	0.524568	0.179914	0.735917	0.496195	0.832698	0.0524519	-1.0683	0.253776	0.744752	1.22245	0.0224326	-1.50884	-1.29992	-1.05005	0.937776	0.889268	-0.21401	-1.60601
ENSG00000064490	O14593	8625	RFXANK	-0.141868	0.983237	1.87429	-1.95066	-1.36892	-1.03458	0.751161	0.187555	1.43767	-1.07875	0.608801	-0.614356	0.174464	0.303039	1.33485	-0.996537	-0.105176	-0.550503	-0.202337	0.00197031	1.7178	0.0370167	-0.811157	-0.557007	0.339878	1.07487	0.627858	-1.28416	-0.384057	-0.529787	0.684031	-0.111151	1.35818	0.0904306	-0.833763	-0.173517	0.820322	1.29629	0.996244	-1.2371	-0.168563	-1.16476	1.13044	1.12483	0.790952	-1.49518
ENSG00000099204	O14639	3983	ABLIM1	-2.2358	-0.197878	-0.768128	2.12896	1.2226	0.626526	-0.524655	-0.547798	-1.01034	0.482151	0.139533	-0.771029	-0.556078	-0.665346	0.447838	-0.171908	0.647416	0.456975	-0.763912	0.268328	2.00629	-1.28332	0.538006	0.531567	-0.16174	-0.0691636	-0.102465	1.42144	1.36948	1.41848	-1.34565	-1.4765	-1.2585	0.354142	0.149108	-0.0285713	-1.27246	-1.60196	-0.998908	0.943347	0.521518	1.07115	0.546874	-0.99198	-0.777643	1.12108
ENSG00000004975	O14641	1856	DVL2	1.31976	1.27417	0.492035	-0.202584	-0.764122	-1.42727	1.0369	0.56354	0.110901	-1.59251	-1.32041	-1.85926	1.50449	0.463271	0.805207	-0.695819	-0.88894	-0.908155	0.884128	0.925284	0.756867	0.0615637	-0.226218	-0.312835	0.255243	0.573536	0.798928	-1.40263	-0.344965	-0.90065	0.858119	0.0802399	2.08776	-1.17419	-1.4064	-1.13163	1.00003	0.580527	1.34671	-1.9399	0.6276	0.675657	0.0059615	0.248518	-0.668254	-0.800682
ENSG00000153922	O14646	1105	CHD1	1.86755	1.37126	1.80791	-0.599795	-0.179082	-0.570016	1.15526	0.907373	0.863762	-0.784788	-0.884864	-1.12712	0.588315	0.539388	0.598081	-0.80378	-0.607755	-0.72668	0.100061	0.389331	0.102319	-1.42283	-1.3028	-1.28111	1.39039	1.21885	-0.147844	-0.718057	-0.262349	0.195654	0.357375	0.265676	0.968677	-1.01394	-2.40935	-2.62435	1.2102	0.6181	0.956959	0.00867151	-0.369807	-0.642926	0.642878	0.331518	0.360699	-0.224929
ENSG00000173575	O14647	1106	CHD2	-1.00078	-2.4332	-0.477232	0.478674	0.837716	1.45206	-0.17177	-1.84074	-0.0156437	0.546108	-0.277614	0.493468	-0.906525	1.01022	0.0277197	0.0758072	-0.687175	0.904499	-0.372959	0.893976	0.475402	-1.2714	0.741316	1.51806	-1.56948	-0.431015	-1.12101	-0.997452	0.0422067	0.00886833	-0.955015	-0.557349	-0.209653	-1.57291	-1.55534	-1.25205	0.652711	0.0616066	0.842057	1.17492	0.236002	0.865609	0.85117	0.831854	1.36784	0.847688
ENSG00000136816	O14657	27348	TOR1B	1.50011	0.0780473	1.32542	-0.781102	-0.864849	-1.7404	0.117976	1.41999	-0.439246	-1.37014	-0.832014	-1.56607	0.976065	1.17279	0.434551	-0.378824	-0.0317922	0.771271	1.22375	0.31316	-0.035346	0.624298	-0.58954	-1.32812	-1.87425	-1.42766	-0.628896	0.63631	0.934181	0.717275	-1.62688	-0.965606	-0.430379	-0.465735	-0.112492	-0.016272	0.153875	-0.693126	-0.169626	1.53891	0.843238	1.30653	-0.560823	-0.634283	-0.406386	1.29724
ENSG00000124222	O14662	8675	STX16	0.382449	0.691021	-0.26859	-0.415823	2.29223	0.205832	-1.13543	-0.920301	-1.94661	-1.10569	0.275571	-1.26834	0.605177	-1.19262	-0.25924	-0.745299	0.412907	0.265326	0.243868	0.332021	-0.302428	1.39928	1.47012	0.984551	-0.371736	-0.03341	-0.259671	-1.10915	-0.00439428	-1.24825	-0.528504	-0.0273447	-0.309757	-1.43382	-1.89344	-1.18422	1.51867	0.713068	1.54634	-0.33353	-0.00479559	-0.659105	1.19013	1.15542	1.53765	0.386904
ENSG00000171617	O14682	8507	ENC1	-0.466102	-1.03545	-0.91127	-0.686119	-0.117537	-0.518206	-0.237861	-0.368176	-0.10062	-0.57689	-0.890356	-1.09345	0.00471038	0.321129	-0.00734592	-0.105306	0.0540939	-0.0824492	0.121927	-0.160155	-0.183656	3.08499	1.78893	2.16517	-0.569146	-0.736572	-1.08178	-0.560414	0.137388	-0.23211	-0.048665	0.180367	-0.0860277	-2.23938	-1.20197	-1.82186	0.708249	0.431409	0.762462	-0.311366	0.309773	-0.114795	0.125488	0.619148	1.08689	1.51155
ENSG00000175274	O14683	9537	TP53I11	-0.0182091	-0.559578	-0.138196	1.03339	0.339837	0.13385	-0.476256	-0.239298	-1.58572	1.43476	2.64497	1.27046	-0.258787	-1.20897	-0.952177	0.883425	0.818431	0.721948	-0.498843	-0.609124	-1.50425	-0.0609905	-0.483392	-0.68729	-0.123132	-0.343357	-0.187729	1.03083	0.0720347	0.759547	-0.0594049	0.0145471	-0.00609986	2.08881	2.0861	2.01221	-1.45269	-1.0005	-1.3764	0.358696	0.0017748	0.103582	-0.904144	-0.343647	-1.14743	-0.82713
ENSG00000148344	O14684	9536	PTGES	0.201505	0.802646	0.112412	-0.0290076	-0.580279	-1.46516	-0.442589	0.494275	-1.4251	0.906744	1.75309	0.413565	-0.870224	-0.00453096	-0.826508	1.94722	1.14794	0.889867	-1.17849	-1.03547	-1.74693	0.603054	0.105636	0.226346	0.597709	-0.0857917	-0.00188893	0.141683	0.445397	0.80273	-0.0953824	-0.919779	-0.564922	1.10808	2.01521	1.77888	-1.07746	-0.400866	-1.11266	1.03444	1.13573	0.242716	-1.32092	-1.30086	-1.87959	0.0561659
ENSG00000109062	O14745	9368	SLC9A3R1	0.470645	1.94562	1.17599	-1.08336	-1.03493	-1.41142	0.386715	0.809634	0.241367	-0.722144	-1.30537	-1.60814	0.868928	0.696522	0.615042	-0.650161	-0.780276	-0.940961	1.2604	1.02223	1.04936	-0.301805	-0.140541	-0.563337	0.575437	0.625844	0.779274	-1.00214	-1.04449	-1.09694	0.900621	0.801735	0.520248	-1.86852	-2.05353	-1.67831	0.889651	1.29149	0.592981	-0.26588	-0.528445	-0.371722	1.16614	1.12281	0.385397	0.153685
ENSG00000149554	O14757	1111	CHEK1	1.31353	1.24654	1.44378	-1.00072	-0.993975	-0.604681	1.05884	0.871992	0.914972	-1.11049	-1.13233	-1.01628	0.694673	0.645337	0.860788	-1.12094	-0.884045	-0.646237	0.911241	0.73768	0.763151	-1.16598	-0.947491	-0.839354	1.19671	1.21066	1.40948	-0.762716	-0.871969	-1.08742	1.04341	1.01637	1.07834	-1.28149	-1.55788	-1.08133	0.555811	1.14316	0.507028	-0.329392	-0.827264	-0.846466	0.992109	0.942513	-0.272017	-0.544864
ENSG00000080986	O14777	10403	NDC80	0.999902	1.16662	1.25561	-0.830065	-1.34041	-0.886042	0.784665	1.07943	0.681281	-0.969638	-1.0866	-1.02026	0.959149	0.744413	0.945734	-0.816636	-1.00942	-0.861308	1.06071	1.03421	0.84817	-0.574932	-1.10996	-1.05461	1.07603	1.08252	1.01515	-0.888612	-1.17667	-0.898017	1.00014	0.847966	0.908266	-1.27111	-1.20552	-0.888612	0.776413	1.1948	1.02358	-0.721272	-1.05986	-0.870175	1.12945	1.14772	0.265683	-0.656443
ENSG00000105576	O14787	30000	TNPO2	-2.00721	-2.27036	-1.19133	0.604672	0.476113	1.63487	-0.896179	-0.870139	-0.226022	0.286268	-0.095247	0.603378	-0.596838	-0.091935	-0.382262	1.61316	0.427814	0.494654	0.105217	-0.548313	-0.0695027	0.819752	0.805668	1.37379	-0.971751	-1.65858	-0.624542	1.35373	0.985632	0.119376	-1.8338	-1.21728	-1.69585	0.422323	0.303077	0.210224	0.627074	-0.742649	-0.666042	0.579615	1.1425	0.429821	0.0880115	0.117987	-0.561352	0.89298
ENSG00000148606	O14802	11128	POLR3A	1.25546	0.809307	0.947212	-0.766755	-2.1732	-1.89531	-0.251971	0.591054	-1.03026	-1.39695	-0.422228	-0.562601	0.259503	-0.340943	-0.431311	1.28664	1.33207	1.09996	-0.219465	-0.33388	-0.0357867	0.860534	0.453848	0.96507	-0.939458	-1.71701	-0.870665	1.49399	1.5553	1.03185	-1.3242	-0.712014	-0.925952	1.10729	0.686215	1.23476	-0.342141	-1.56271	-0.407695	0.829521	-0.0129497	0.731785	-0.651368	-0.770238	-0.337706	0.846548
ENSG00000143198	O14880	4259	MGST3	-1.55549	-0.343014	-0.453148	0.488144	-0.222503	-0.554519	-0.4105	1.23477	-1.60142	1.38839	1.69244	0.0615229	-0.592529	-0.56005	-0.999995	1.38852	1.32509	0.852404	-0.849757	-0.439074	-1.54059	0.949014	0.557064	0.185222	-1.79513	-1.00258	-1.2319	0.728559	0.172263	0.776914	-0.403535	0.357342	-1.46812	1.52839	1.75461	1.86682	-0.621487	0.263233	-0.944314	-0.0286922	1.10561	0.34509	-0.369374	-0.763561	-0.886357	0.476899
ENSG00000213977	O14907	30851	TAX1BP3	1.42444	1.98193	1.82488	0.812313	0.305017	0.299155	1.20172	-0.131966	-0.19983	-1.05606	0.152546	-1.31329	-0.184624	-1.5585	-0.0636309	-0.151604	-0.186353	1.05315	-0.0128354	-0.427808	-1.02384	-0.14192	-1.64251	-0.96039	1.07035	0.00346	0.323557	0.087485	0.855077	1.10164	0.404373	0.410023	0.796058	1.3278	1.56162	1.60342	-0.894645	-1.9732	-0.641694	-1.1076	0.220689	-0.206893	-1.19554	-0.790248	-0.27615	-1.65886
ENSG00000111052	O14910	8825	LIN7A	2.28583	1.98357	1.38644	0.0238249	0.600441	0.371162	-1.68894	-0.196302	-0.841905	-0.176503	0.924652	0.248638	0.190999	-1.08899	-0.244931	0.839915	-0.364249	-0.00018511	-0.873541	-1.37185	-0.594169	0.36724	-0.764414	-1.01673	-0.141808	-0.143614	-0.153286	1.27729	0.76645	1.03954	-0.863276	-0.584512	-0.853023	1.67525	1.58323	1.76225	-0.855068	-0.93624	-0.735728	0.678275	0.545874	0.569104	-1.77893	-1.35194	-0.952641	-0.247515
ENSG00000104365	O14920	3551	IKBKB	1.7938	1.29453	0.919592	-0.566789	-1.26909	-0.806166	-0.839896	1.24682	0.506689	-1.09288	-0.519178	-0.722788	0.15987	0.690097	0.918413	-1.48912	-0.345574	-1.14256	1.26194	0.685384	1.14224	-0.240404	-0.288671	-1.29626	-0.327313	-0.232386	-0.592243	-0.443184	-3.25973	-1.41954	0.549178	1.46848	0.498698	0.624251	-0.300944	-1.31796	1.04199	0.270956	0.871146	1.25356	0.158107	-0.220171	0.243347	0.234905	0.792302	-0.386235
ENSG00000128708	O14929	8520	HAT1	0.767876	0.495254	0.735442	-0.807164	-1.2242	-0.704776	1.19843	0.97783	0.955809	-0.840898	-1.04334	-0.887991	0.98966	0.629314	0.9444	-0.894369	-0.890751	-0.922337	1.4233	1.29879	1.05546	-0.983573	-1.14902	-1.12315	0.962872	0.799996	0.691108	-0.929348	-0.73297	-0.968819	0.813991	0.949099	0.94979	-1.16461	-0.776494	-1.11748	0.573535	0.996791	0.149581	-0.85485	-1.14184	-0.798712	1.79293	2.04203	-0.148687	-0.487837
ENSG00000156587	O14933	9246	UBE2L6	0.57089	0.78954	0.330415	-0.204174	-1.49183	-0.89741	-0.0950118	1.00856	-0.771263	1.05004	1.97598	0.0404023	0.696425	0.159507	-0.486251	-0.864431	-0.303397	-0.372442	1.57158	0.904256	0.802146	-1.71549	-1.36709	-1.33096	-1.33918	-1.30795	-0.940599	0.605255	0.532856	0.266256	-0.441042	-0.507016	-0.8135	2.16845	1.87891	1.82415	-1.08077	-0.729562	-1.37498	0.316168	0.106532	0.119646	-0.337866	-0.0188515	-0.512921	0.154151
ENSG00000147044	O14936	8573	CASK	-1.15867	-1.0415	-1.05816	0.740845	0.680082	0.507378	-0.750463	-2.01643	-1.53203	0.241491	-0.739713	-0.602255	-0.253476	-0.361685	-0.333411	1.04264	-0.396098	0.750081	0.945907	1.09753	0.0208908	1.65027	1.35283	1.21393	-0.0757592	-0.538121	-0.945037	1.97791	1.76919	1.2915	-1.95633	-1.17729	-1.9019	-0.603187	-0.221728	-0.518281	-0.421349	-0.869066	-0.0421129	0.38229	0.391319	0.19008	0.702686	0.596506	-0.0439075	0.929052
ENSG00000164405	O14949	27089	UQCRQ	-0.526695	-0.973868	-0.314847	0.211704	-0.75942	-0.450706	-0.0525796	0.705625	-0.238861	1.45226	2.1261	1.16132	-0.318911	-1.8835	-1.05486	1.57859	1.00183	0.696004	-0.884898	-0.850717	-0.945437	0.503943	0.580298	-0.76239	-0.0547465	-1.16457	-0.224214	1.30031	-0.405309	0.720569	-0.38407	-0.895811	-0.515777	2.0457	0.456385	1.59428	-0.544025	0.255964	-2.49316	0.282774	1.02661	0.488625	-0.25466	0.14573	-1.38205	0.589877
ENSG00000118680	O14950	103910	MYL12B	1.83335	1.67523	2.19738	-0.43058	-0.622553	-0.169108	-0.536784	1.11055	-0.120301	-1.08622	-0.107143	-1.26448	0.41729	-0.994756	-0.247336	-1.34075	-0.16729	-0.531046	-0.310717	-0.142953	-0.0721842	1.79685	-0.441526	-0.44492	-1.1771	-1.899	-1.31106	0.834019	0.297473	0.148708	-0.800555	-0.745541	-0.796353	1.40406	1.50605	1.29864	-1.38925	-0.597627	-1.0899	0.541675	1.39685	0.660033	-0.0723534	-0.164708	-0.124713	0.796435
ENSG00000185359	O14964	9146	HGS	-1.89251	-0.640634	-1.73215	0.518906	0.812487	0.599383	-0.430887	-1.16347	-1.75665	0.954017	0.504752	-0.671867	-0.373038	-0.41964	-0.312097	1.1017	0.655655	1.04402	0.00228719	-0.273204	-0.421928	1.41114	1.20404	1.27968	-0.283106	-2.18856	-2.351	-0.573677	0.287535	-0.802794	-0.596872	-0.784753	-0.386567	0.3088	0.237524	-0.423503	0.567288	0.32509	0.453343	0.843832	1.59896	0.374148	-0.668526	0.790836	1.22736	-0.439518
ENSG00000117280	O14966	8934	RAB29	-0.0583288	0.0890858	0.88548	-2.25293	-2.52799	-1.09611	1.14001	1.06281	0.469433	-1.00321	-0.905509	-1.18961	0.608697	1.37936	0.528418	0.470929	0.202558	0.13454	0.543929	0.281446	0.271193	0.428719	0.4021	0.134978	-1.03276	0.41961	0.189761	-0.931764	-2.09458	-1.7065	-0.366952	-0.535001	0.0795196	-1.04759	-0.87616	-0.962986	1.24446	1.02757	1.09523	1.31721	0.868655	1.40613	-0.539671	0.0672952	0.164829	0.503806
ENSG00000153132	O14967	1047	CLGN	0.429723	1.53491	1.02446	1.06697	0.02958	0.433076	0.321412	0.135375	0.273077	-0.102458	-0.458324	-0.37952	1.26879	-0.776592	0.866122	-1.59328	-0.847645	-0.759846	-0.272441	1.06169	1.23188	-2.37903	-1.30332	-0.804613	1.0846	1.72527	1.28911	-0.0436678	0.991614	0.627911	-0.0841707	-0.355861	-0.311101	-0.641241	-0.158136	-0.39443	-1.08834	-0.00736757	0.196282	-0.715223	-1.22451	-1.06512	1.98371	1.58047	0.11482	-0.957011
ENSG00000152795	O14979	9987	HNRNPDL	-1.85112	-1.80061	-1.02728	0.497741	1.80456	1.76245	-0.371783	-1.58463	0.343181	0.3709	-0.833412	0.84986	-0.983403	-0.117503	0.265286	0.587571	-0.025704	0.993207	-0.504264	0.18688	0.231873	-0.325527	0.354547	1.17717	0.476764	-1.00143	-1.04819	-1.00026	-1.49784	-0.91974	0.375941	0.649971	0.267922	-1.96228	-1.87734	-0.75261	0.167996	0.615401	0.575179	0.912686	0.126363	0.425338	1.17394	1.27065	0.878228	1.36886
ENSG00000185666	O14994	8224	SYN3	-0.904464	-0.731065	-1.13483	1.49769	1.21947	1.39396	-0.830528	-0.591651	-0.998358	1.58877	1.73453	1.43368	-0.850364	-0.166809	-0.947444	1.11154	0.328587	-0.0573091	-0.651921	-0.32505	-1.03074	-0.545569	-0.151549	-0.39057	-0.496018	-0.919206	-1.13664	1.9572	1.32197	1.48235	-0.40894	-0.517172	-1.16934	1.64938	1.29983	1.21346	-0.0617132	-0.112985	-0.842843	0.525019	-0.183811	0.491899	-1.07463	-1.16381	-1.07963	-0.289305
ENSG00000173898	O15020	6712	SPTBN2	-0.266178	-0.818336	-0.472685	2.17908	2.12937	1.99122	-0.533212	-0.684758	-0.453293	0.817987	0.967312	0.194037	-0.757936	-0.90462	-0.592656	0.810184	0.261314	0.480585	-0.818186	-0.823741	-0.885311	-0.307221	-0.998335	-0.514626	-0.647663	-1.42747	-0.789819	1.65134	0.781503	0.526889	-0.55256	-1.06089	-0.554379	0.759575	0.403243	1.04621	-0.578575	-0.896449	-0.643444	1.43676	0.809915	0.838347	-1.76581	-0.94733	-0.923581	0.358969
ENSG00000148396	O15027	9919	SEC16A	-1.1028	0.223972	-0.337911	-0.0471404	0.41705	-1.26777	-1.35777	-0.350995	-2.26289	0.300163	2.07294	0.458593	0.0561863	-0.493476	-0.137185	1.0277	0.895567	1.62892	0.0431267	-0.653475	-0.639158	1.59185	-0.0159764	-0.049513	-1.08055	-1.42799	-0.964398	-1.20144	-0.233673	-1.17733	-0.402649	0.424661	-0.175104	-1.38333	-1.13819	-0.693632	0.669038	0.733811	1.90904	-0.125641	0.420735	0.919681	0.111867	0.0715178	1.53247	0.679409
ENSG00000196576	O15031	23654	PLXNB2	1.19716	1.20443	1.46711	-1.39323	-0.337483	-0.268783	0.787282	0.526236	0.479184	-1.63263	-1.14298	-1.07618	1.32495	0.564633	0.666577	-1.71854	-1.12135	-0.546904	0.738502	0.714896	0.930641	-0.448324	-0.525523	-0.389668	-0.601043	1.1567	0.381571	-1.54675	-1.17758	0.669632	0.989799	0.467596	1.37782	-1.27292	-1.11902	-1.20478	0.102463	0.811503	1.01619	-0.962376	0.98726	-0.571097	0.544386	0.577122	1.26778	-1.80921
ENSG00000163714	O15042	23350	U2SURP	-0.546044	0.835142	-0.00454753	0.604766	0.320785	0.818973	1.82128	1.32014	2.13235	0.86021	-1.31339	-1.16456	-0.148342	0.0813611	0.280461	-0.326783	0.185217	-0.461789	-0.684176	-0.933443	-0.608944	-2.18337	-0.67313	-0.212177	1.57645	0.960116	0.276922	0.714902	0.796978	-0.179579	-0.999314	-0.566915	-0.464789	-1.79403	-1.97827	-0.990663	1.15525	0.1824	1.62233	0.708177	-0.27174	-0.816593	0.0652884	1.01535	0.695422	-1.08672
ENSG00000182253	O15061	23336	SYNM	0.563104	0.464925	0.62178	-0.560116	-1.02772	-1.01873	-0.509081	1.05631	-0.740303	-0.71792	-0.543028	-1.73712	1.96482	1.04801	1.13269	-0.554815	0.0474102	-1.10922	1.84607	-0.139342	1.20864	0.206444	-0.552404	-0.950407	-0.191435	-0.372892	-0.573865	0.333657	1.14041	0.555071	-0.697718	-0.766453	-0.729366	-1.1241	-1.44561	-1.32045	1.49082	0.992193	2.41997	-0.619537	-0.445317	-0.191435	-0.35189	-0.376424	1.99574	0.369028
ENSG00000101350	O15066	9371	KIF3B	-1.52788	-0.80514	-1.38849	1.18162	1.33088	1.12317	-0.771803	-1.79211	-0.941546	1.66166	1.00667	1.22882	-0.906249	-0.596911	-0.567575	1.16376	-0.10294	0.255754	-0.307037	0.0905555	-0.417184	0.214171	0.596784	0.27102	-1.32493	-1.81142	-1.40922	1.18657	0.791995	0.717687	-1.05899	-0.548002	-1.12142	1.33345	1.50105	1.3436	-0.345416	-1.08445	-0.466416	0.980105	0.461752	0.728047	-0.91919	-0.314753	0.0737014	0.128544
ENSG00000178921	O15067	5198	PFAS	1.80671	2.07829	2.0511	-0.364017	-0.887508	-0.26615	0.973278	1.08984	0.233031	-1.0365	-0.625622	-1.02456	0.641778	0.161872	0.251092	-0.835154	-0.643396	-0.672653	0.232953	-0.205183	0.130768	-0.712249	-1.1658	-1.21193	1.36053	0.568633	1.06806	-1.87585	-1.9202	-0.848239	0.189223	0.638943	1.86481	-0.953058	-1.62577	-0.290191	0.709455	-0.577119	1.12046	0.0609709	-0.931065	0.205969	0.668295	-0.112695	-0.137208	-0.288049
ENSG00000126217	O15068	23263	MCF2L	-1.01744	1.34192	-0.0556395	0.904663	0.151531	1.71319	-1.18908	-0.710963	-0.276763	0.858464	1.41885	0.583419	-1.03619	-1.28113	-0.658502	0.177099	-0.253508	1.7359	-1.49741	-1.24876	0.164109	0.608807	-0.827748	0.395178	-1.14252	-2.10228	-1.67027	0.574109	0.267552	0.407903	-1.11814	-0.830561	-1.17681	0.708068	0.751476	0.43934	-0.213373	-0.972169	-0.256569	1.03395	1.23666	0.903611	-0.649303	-0.0625392	0.489883	1.02065
ENSG00000136274	O15069	23148	NACAD	-1.09371	-0.800309	-0.816396	1.62647	1.87901	0.831358	-0.70304	-0.944401	-0.532875	1.05345	1.38858	0.489319	-0.583804	-0.950507	-0.987888	1.10889	0.785572	1.0499	-0.726259	-1.10393	-1.26848	0.342314	-0.162259	0.118993	-1.19776	-1.23754	-1.17784	1.1329	1.87079	0.826032	-0.906274	-0.994923	-1.05211	0.940294	0.8911	0.691497	-0.757184	-0.219764	-0.978999	0.97655	0.846356	0.509108	-1.04421	-0.363543	-1.14976	0.984964
ENSG00000133083	O15075	9201	DCLK1	-1.74687	-1.89034	-1.76908	1.184	1.63859	1.40955	-0.926392	-1.38999	-0.544418	0.504016	0.489186	0.119543	0.0382762	-0.816998	-0.0233107	1.25412	0.454717	0.537635	-0.34508	0.460657	0.441173	0.446274	0.209773	0.264978	-0.90507	-2.27651	-2.30515	1.51077	1.65218	1.35374	-0.994095	-0.591057	-1.03101	0.328526	0.585678	0.773262	0.0308992	-0.315375	-0.172137	0.586968	0.264538	0.493044	0.579867	0.122212	-0.317968	0.130424
ENSG00000187672	O15083	26059	ERC2	-0.570038	-0.758376	-1.16333	0.407891	-0.354493	0.58992	-0.926468	-0.969012	-1.31217	1.03112	0.304121	1.40314	-1.01426	-1.25807	-0.470444	0.97243	0.266444	0.835497	-1.13362	-0.445033	-0.107711	1.84886	1.32222	1.50138	-0.722083	-0.382566	-0.698224	1.28549	1.18296	1.38868	-0.553363	-0.695863	-1.22936	0.792839	0.923005	0.826677	-0.193152	-1.49225	-0.892166	0.94407	0.61329	0.734318	-1.7062	-1.60438	-0.675972	0.856569
ENSG00000100890	O15091	9692	PRORP	1.05766	0.934687	1.80183	-1.21064	-2.07842	-0.936086	0.882316	1.48193	0.594995	0.177577	0.379742	-0.458114	0.479239	-1.22607	0.302563	0.860765	-0.730816	-0.530449	0.713217	-0.318129	0.482341	-0.454046	-0.592047	-1.61404	1.13787	0.297852	0.873868	-0.181013	0.974541	-1.14008	1.29482	0.592941	1.02395	0.00367253	-0.0525469	0.839239	0.266595	0.759831	0.155242	-1.92673	-1.37947	-1.09581	0.758288	0.934869	-0.691325	-0.987246
ENSG00000169692	O15120	10555	AGPAT2	1.4373	1.86952	1.23963	-0.164281	-2.13041	-1.71853	1.14451	1.63517	0.730348	-0.362067	-0.349534	-0.98407	0.171017	0.290749	-0.0081856	0.494525	0.0487436	-0.836032	-0.19474	-0.0848829	-0.211705	-0.465376	-0.582892	-0.968806	1.36141	1.74014	1.63988	-1.95852	-1.46114	-2.03069	0.685469	0.958052	1.02612	-0.143125	-0.0567854	-0.860156	0.234942	0.594718	0.358676	0.211984	0.167248	0.0134426	-0.532446	0.0601887	-0.156212	-0.8086
ENSG00000085365	O15126	9522	SCAMP1	-0.266009	1.26187	0.565818	1.10834	1.01917	0.403134	-0.756391	-0.468519	-1.47426	1.18017	2.07629	0.299971	-0.869405	-1.20575	-1.23374	0.927507	0.736471	0.55077	-0.96544	-1.05365	-1.38826	0.328489	-0.312422	-0.464168	-0.888798	-0.89634	-0.0376076	1.68137	1.51439	1.39292	-1.09547	-0.811852	-0.811367	1.12863	1.13485	1.04219	-0.800249	-0.957109	-0.923199	1.06216	0.463012	0.737307	-1.2496	-0.872295	-1.21324	0.0539166
ENSG00000163466	O15144	10109	ARPC2	-1.024	-0.0617903	-0.421357	0.0510655	0.0460154	0.163243	-1.63588	-0.923768	-1.27614	-0.0211749	1.09844	0.476319	-0.0819677	-0.837504	-0.582924	0.769507	1.45114	1.28219	-1.07715	-0.706906	-0.609854	2.62289	0.627675	0.67193	-0.873506	-1.62833	-1.09685	0.881809	0.931556	0.478191	-0.51857	-0.851312	-1.03254	1.53525	1.80004	1.53442	-1.13381	-0.577917	-1.22389	0.567264	0.957995	0.587003	-0.481985	-0.370936	-0.864169	0.418872
ENSG00000111229	O15145	10094	ARPC3	-0.799774	-0.625248	-1.24478	-0.74063	-0.0335743	0.814749	-1.26563	-1.745	-0.677026	0.32166	0.272617	0.846852	-0.131695	-1.40469	-0.538242	1.81428	0.905925	0.68859	-0.441799	-0.408015	0.253577	1.68999	1.04842	1.39944	0.0670525	-1.26412	-0.968303	0.266171	0.00670202	0.525932	-0.372653	0.292653	-0.848054	2.06611	1.64484	2.00231	-1.27561	0.522214	-1.2696	-0.147056	1.07079	0.812356	-1.26099	-0.630737	-0.905032	-0.0918205
ENSG00000122779	O15164	8805	TRIM24	1.3444	-1.5417	1.42392	0.00987857	0.794708	1.18242	1.15958	-0.727651	1.3908	-0.226344	-1.72456	-0.938301	0.101561	0.0157346	-0.0685741	-0.573277	-2.08805	-0.751722	0.530036	1.14219	0.081801	0.0396312	-0.200724	-0.375747	1.38074	1.06932	0.95828	-0.307391	-0.53863	-0.345074	0.935234	1.3909	1.12524	-1.15839	-1.63263	-0.856544	1.22025	1.00173	0.772395	-1.04314	-0.452457	-1.32946	0.624074	0.383252	-0.455701	-1.04314
ENSG00000164040	O15173	10424	PGRMC2	-0.0239468	0.865978	1.53159	-1.62876	-2.19594	-1.86018	1.36253	1.50395	0.647892	-0.0392145	-0.452073	-0.636317	0.417975	0.572538	0.760568	-0.859839	-0.416353	0.0321202	-0.711076	-0.570863	0.72015	0.0054317	0.502809	0.471026	0.4645	0.492229	0.641312	-1.28182	-1.23296	-1.73756	1.15554	1.13258	0.950433	-1.40845	-0.740008	-0.959195	1.29433	1.10956	1.31407	-0.740545	-0.736791	-0.561842	0.749924	0.189091	1.22651	-0.0903421
ENSG00000204220	O15212	10471	PFDN6	-0.759081	-0.0529208	-1.02491	-0.352015	-0.0155272	-0.159803	0.174256	0.0951161	-1.33768	1.48507	0.945482	0.668078	-0.975286	-0.850178	-0.848826	2.07854	1.49295	0.886392	-0.865866	-1.09795	-1.49391	1.25559	0.18873	0.563753	0.252013	0.530353	0.864869	1.40463	1.29193	0.493051	1.62631	0.00221818	0.762187	0.136354	-0.177942	0.353184	-1.74926	0.127596	-1.37083	-0.424875	1.26682	0.173427	-1.06194	-1.42684	-1.77666	-1.19608
ENSG00000170899	O15217	2941	GSTA4	-0.402787	0.48446	-0.0944498	0.848789	0.646323	0.737879	-0.666772	0.684056	-1.44528	1.31265	2.13761	0.215331	0.303132	-0.0711464	-0.529814	0.638011	0.626863	0.0736997	0.510117	0.0549153	-0.835037	-1.3015	-2.0706	-1.85645	-0.990419	-1.42166	-0.890647	1.52979	1.37935	1.71424	-0.306526	0.0552267	-0.523739	1.4466	1.40441	1.48806	-0.682019	-0.387676	-0.855043	0.103741	0.710529	0.328493	-0.674545	-0.283658	-0.893429	-0.908252
ENSG00000186416	O15226	55922	NKRF	-0.273171	-0.355161	-0.544527	0.879194	0.763276	-0.104961	-0.676249	-0.333778	-1.41099	0.720849	1.05477	0.436163	-1.24555	-0.74126	-0.801876	0.616496	1.99877	1.50001	-1.15909	-1.19216	-1.47987	1.37962	0.315961	0.653525	-0.722807	-0.787624	-1.72197	1.14962	1.07505	1.13368	-1.09224	-1.0714	-1.07348	0.148064	0.678962	0.834392	-0.770355	-0.433991	-0.702079	1.0762	1.18353	1.11195	-0.968965	-1.04037	-0.783779	0.867649
ENSG00000147394	O15231	7739	ZNF185	0.264772	3.2945	2.67927	-0.41095	-0.37851	-0.814313	-0.721724	0.619111	0.227833	-0.542325	-0.180907	-0.647334	-0.316857	-0.151373	-0.53031	-0.51459	0.151545	-0.192051	0.143705	-0.408415	-0.897024	-0.584904	0.232025	-0.32118	0.366801	1.18864	2.30912	-0.29736	-0.441499	-0.0863714	-1.51919	-0.741319	-0.00789539	-0.317451	0.615129	0.0681994	-1.01887	-1.10022	-1.27128	0.916189	0.549372	0.932582	-1.13724	-0.789551	-1.21296	0.86636
ENSG00000108349	O15234	22794	CASC3	1.33439	2.37415	0.970888	-1.01401	-1.2892	-0.425007	-0.731459	1.77244	0.281954	-1.13504	-0.951276	-1.14174	0.796607	-0.67372	-0.197794	-0.901827	0.309966	-0.185294	0.0551478	-0.28804	0.309949	1.36234	-0.637999	0.00457644	-1.51969	-1.48577	-1.25988	-0.849493	-0.581509	-0.359543	-0.975743	-0.84382	-0.846971	-0.204722	-0.059461	-0.671288	0.694463	-0.63776	0.926807	1.02091	0.352421	0.388624	0.219431	0.698317	1.21914	1.33108
ENSG00000128564	O15240	7425	VGF	-0.580458	-0.513331	-1.13163	1.25468	1.82139	-0.237965	-0.327846	-0.373609	-1.38536	1.85933	1.11303	0.133102	-0.345055	-0.0841697	-1.77854	1.37813	0.612205	0.726586	-0.26369	-0.192779	-1.29574	0.525268	0.143455	-1.05701	-0.818688	-0.545787	-1.26842	1.36882	1.51221	1.54618	-1.3372	-0.467712	-1.01509	0.981912	0.721441	1.1272	-1.00706	-1.01106	-1.07797	0.683265	0.612818	0.59266	-1.07362	-0.757528	-0.728579	0.50098
ENSG00000090054	O15269	10558	SPTLC1	1.41014	1.2273	1.50125	-0.187512	-0.939156	-1.07981	1.26898	1.02128	1.08513	-0.607354	-1.20101	-1.33224	0.786459	0.609218	0.397704	-0.903396	-1.1619	-0.486807	0.586634	0.707996	0.185235	-0.581337	-0.752113	-1.55468	0.998451	0.708643	0.849538	-0.476019	-1.56981	0.222162	-0.0698908	0.224084	0.0556507	-2.15223	-2.0649	-1.50266	1.23724	1.64202	0.679191	-0.936299	0.178764	0.185534	0.0979337	0.721096	0.760961	-0.105207
ENSG00000147162	O15294	8473	OGT	-0.793883	-0.563655	-0.410537	-0.118003	0.0416808	-0.280646	-0.725991	-1.03282	-1.14101	0.204404	1.31854	-0.761499	-0.877914	-0.459048	-0.66983	2.85492	1.77956	1.30299	-0.145619	-0.535728	-0.766152	0.877349	0.363975	0.538927	-0.976134	-2.00839	-0.0182409	0.132655	1.68169	1.10072	-1.02826	-0.558045	-0.659457	-1.20428	-0.863838	-1.17372	0.534709	0.94062	0.942384	-0.452036	0.506018	-0.249249	0.0957723	1.41947	1.0168	-0.0697671
ENSG00000101871	O15344	4281	MID1	-0.201635	0.725334	1.4327	1.03704	-0.278336	-0.0317132	1.7814	1.23338	0.805959	0.556709	-0.316377	-0.140959	-0.322272	1.6118	0.347949	-0.409426	-0.788674	-0.30023	-0.790003	-0.676888	-0.57962	-2.37348	-1.18331	-1.13935	1.43526	1.31358	1.49536	-0.353952	-0.795247	-0.496829	1.0152	1.02133	1.45916	0.0198193	-0.22389	0.131336	1.05764	0.623853	0.30273	-0.247204	-1.02809	-1.00074	-0.145084	-0.379879	-0.467794	-1.66899
ENSG00000165458	O15357	3636	INPPL1	1.27991	0.977696	1.05014	-0.771609	-1.77291	-0.966055	0.689832	1.36533	0.415206	-0.966511	-0.9044	-0.974951	1.11351	0.625707	0.609612	-1.1452	-0.800448	-0.705239	1.28603	0.908016	0.858139	-0.40536	-0.772703	-0.993738	0.98701	0.872808	0.843615	-1.6122	-1.78477	-1.41619	0.992926	0.842037	1.04134	-0.0918368	-1.0886	-0.660171	0.869774	1.01525	0.857716	-1.13071	-0.57259	-0.728841	1.00445	1.05651	0.597973	-0.540197
ENSG00000177732	O15370	6666	SOX12	2.63475	0.19755	0.350915	-0.0776865	-0.678875	-1.10509	-1.07947	0.0555687	-0.108052	-1.26162	-1.24382	-0.832655	0.00165126	0.822275	-0.370742	0.210093	0.867755	0.473083	-0.554271	0.237166	-0.650794	2.52762	0.0148811	-0.43024	-0.910818	-1.00311	-0.403299	0.962209	0.610545	0.875294	-0.127362	-0.23	-0.00705233	1.42888	1.31785	1.15135	-1.23641	-1.2917	-1.10928	0.419788	1.4222	1.4222	-1.28034	-1.2177	-1.32974	0.315679
ENSG00000171720	O15379	8841	HDAC3	0.589283	0.838953	1.43566	-0.184808	-0.762605	-0.0404298	-1.13125	1.27811	0.381791	-2.26671	-0.775251	-0.430699	0.109015	0.432857	1.26932	-1.53205	-0.383161	-0.397897	1.06312	0.393243	1.45077	-1.53932	-0.0483554	0.250421	-0.969037	-1.04798	-0.785264	-0.2301	-0.059075	0.27584	-1.13355	-1.75853	-0.935862	-0.817776	-1.3664	0.110567	0.047248	0.378709	0.939385	0.840679	0.766484	1.29454	-0.665443	0.257256	0.0521853	1.66046
ENSG00000133704	O15397	10526	IPO8	1.2504	1.77242	1.65331	-1.35864	-0.952006	-1.09327	0.867505	1.3623	0.415615	-0.621777	-0.0554856	-0.673241	0.844896	0.152747	0.480671	-0.856849	-0.380244	-0.61342	0.876048	0.31921	0.349473	-1.17501	-1.05223	-1.51242	0.730196	-0.604755	1.35608	-0.440347	-0.797859	-1.34419	0.495678	0.987497	1.41191	0.28952	0.141242	0.672648	0.819903	0.952062	0.442152	-0.434802	-1.14043	-0.635293	0.920178	1.07047	-0.0454212	-1.14376
ENSG00000079950	O15400	8417	STX7	-1.13572	-0.996181	-1.25816	0.837544	0.714179	0.577591	-0.962452	-0.712431	-1.34876	0.925277	1.09469	0.583935	-0.872325	-0.770867	-0.80261	1.30125	1.08319	1.22416	-0.860039	-0.642937	-1.08804	1.13798	0.947202	1.02352	-1.883	-1.5069	-1.1209	1.37118	1.35056	1.07066	-1.33892	-0.594749	-0.89366	0.909355	0.33674	0.695662	0.288759	-0.698213	-0.432897	1.24804	1.17788	0.960515	-1.07844	-0.604203	-0.31528	0.131164
ENSG00000125257	O15439	10257	ABCC4	3.70883	0.701846	0.661531	-1.0289	-0.401976	0.100651	-0.0972287	0.677821	1.18493	-1.0939	-0.752848	-0.46235	0.404654	0.144637	0.0754072	-0.531819	-0.989256	-0.661591	-0.752186	0.0209397	0.404811	-0.478697	-0.283035	-0.552272	1.37977	1.71426	1.44813	-0.619492	-0.597172	0.000385434	1.49641	1.32397	1.48623	-0.670644	-0.592269	-0.735081	0.340611	0.675135	0.0738727	-0.0606077	-0.751751	-0.0070698	-0.537285	-0.699745	-0.668034	-1.39708
ENSG00000072682	O15460	8974	P4HA2	1.62715	1.10461	0.836701	-0.17458	-0.858051	-0.858715	-0.491631	-0.166486	-0.731685	-1.84435	-1.75954	-1.24674	1.12455	1.22771	0.684515	-1.15401	-0.641293	0.374139	-0.432012	0.346332	0.461836	0.516993	1.18554	0.869013	0.139619	0.75351	-0.0350444	-0.582836	-0.0788048	0.238393	-1.31407	-0.81971	0.367002	0.0192932	-1.08169	-1.50528	1.3992	0.601756	2.18497	0.0134969	0.939316	0.167824	-2.04129	-0.554798	1.50085	-0.316798
ENSG00000149260	O15484	726	CAPN5	0.332723	-1.33011	-2.21736	-0.261478	0.759811	1.47859	-1.39214	-1.50684	0.0249856	-1.11906	-0.149377	0.295005	0.230901	-0.839402	-0.13496	-0.119148	-0.26447	0.331867	0.692934	1.61255	1.52613	0.692562	0.575098	0.781187	-2.14441	-1.56253	-1.44171	0.647732	1.17114	1.10968	-1.41344	-0.599394	-1.68917	1.07547	1.13444	0.853887	-0.0165045	-0.372877	-0.0420701	0.615917	0.96219	0.392649	0.535685	0.190146	0.11015	0.344298
ENSG00000106636	O15498	10652	YKT6	-0.4182	-0.250932	-1.04755	0.0775469	0.139257	-0.51535	-0.861911	-0.400178	-2.3103	-0.00156667	0.664489	-0.72947	0.00181961	-0.461675	-0.648435	1.56223	1.9412	1.23358	-0.348223	-0.564316	-0.721505	1.66602	0.806257	1.18723	-0.780764	-2.03047	-1.44647	1.04541	-0.75132	0.289968	-1.2432	-0.441757	-0.421058	0.675051	0.768475	1.74257	-0.812662	-0.754143	0.364674	1.08159	1.26678	0.657882	-0.900829	-0.806951	-0.121116	0.75288
ENSG00000162704	O15511	10092	ARPC5	-0.399586	-0.0543229	-0.0912537	-0.455953	-0.284918	-0.776701	-0.809312	-0.362367	-1.91104	0.263303	0.851724	-0.412661	-0.0819207	-1.14155	-0.722249	1.43475	1.80906	1.14216	-0.312683	-0.591418	-0.897157	2.39801	0.896263	0.509823	-1.41231	-1.72703	-1.88485	0.374454	-0.178205	0.115058	-0.336191	-0.202321	-0.722005	0.0875218	0.491705	0.237949	-0.723141	-0.221842	-0.817062	1.28546	1.31881	1.27027	-0.320462	-0.198466	-0.774784	1.40648
ENSG00000140992	O15530	5170	PDPK1	-2.22894	0.0813857	-1.26154	0.604792	1.23203	0.398425	-0.754804	-1.21009	-1.73726	1.19165	1.11443	0.281154	-0.875372	0.298007	-0.696092	0.730832	1.27123	0.355004	-0.17922	-0.551199	-0.568652	0.546015	1.2111	0.747107	-1.4287	-2.0758	-0.939833	0.66697	0.77453	0.710688	-1.34065	-1.19354	0.296202	0.335531	-0.50275	0.313291	1.23478	-1.30653	-0.269708	1.74271	0.897621	1.19311	-0.754824	0.0246895	-0.19857	0.833355
ENSG00000231925	O15533	6892	TAPBP	-0.0953978	-0.447642	0.306274	-0.930966	-1.96483	-1.12485	0.783709	0.49357	0.776976	-0.183061	-1.50126	-0.890722	1.42209	0.573165	0.914605	-0.634498	-0.981642	-0.300221	1.60146	1.31215	1.63862	0.147371	-0.688322	-0.226566	0.228307	0.736732	0.8623	-1.08392	-0.776453	-1.12926	1.0745	1.04842	1.15497	-0.513742	-0.757905	-0.624147	0.354843	1.86316	0.302872	-1.52738	-0.576954	-0.784443	1.59235	0.744117	0.771987	-0.611644
ENSG00000164434	O15540	2173	FABP7	-0.91739	-1.169	-1.43474	-1.45983	-1.70045	-1.48979	0.459959	0.582735	0.591449	-0.972338	-0.925413	-0.891452	0.557511	1.3229	0.70741	0.684895	0.956782	0.735345	0.900342	0.22983	0.824912	0.81095	0.669184	0.926203	-0.196023	-0.0108156	-0.567625	-2.10416	-2.16492	-1.73825	0.953919	1.00054	0.565846	-0.861854	-0.781655	-1.34525	0.646595	1.25096	0.414138	0.629181	0.836526	0.615082	0.592635	0.606896	0.187508	0.478572
ENSG00000125352	O15541	7737	RNF113A	-1.25152	-1.49052	-1.74442	0.771801	1.67056	1.44996	-0.871582	-0.885999	0.00540633	0.663003	0.299636	1.4409	-0.98537	-0.138921	-0.576937	1.15633	0.857335	0.220738	-1.15419	-0.56124	-0.371072	0.518726	-0.0378495	1.01522	-0.789861	0.119963	-1.11899	0.727522	1.19868	0.63864	-1.00744	-0.892238	-0.652699	0.53175	0.463451	0.520722	0.0158294	-1.4131	0.767458	0.66751	0.705138	1.52741	-1.55851	-2.34946	0.219373	1.06886
ENSG00000147050	O15550	7403	KDM6A	1.34093	0.421789	0.953955	0.361558	-1.34503	-1.01541	0.912794	0.931128	1.22882	0.960416	0.349645	-1.23643	0.780897	0.0604323	0.62249	-1.05511	-1.31344	-0.910854	0.827144	-0.557392	0.959223	-0.553023	-1.97797	-0.746551	-0.396583	-0.501087	-0.561963	-0.818421	-0.088713	-0.077827	-1.50498	-1.01173	-0.0039941	2.31413	1.64786	1.4062	1.19881	0.701604	0.596381	-0.130638	-1.25188	-0.260177	0.889579	-0.427346	0.62207	-1.37816
ENSG00000215021	Q99623	11331	PHB2	-1.02832	-0.0317951	-0.496921	-0.117458	-0.969242	-0.373278	0.14628	0.0135432	-0.487339	2.12651	1.46272	0.843843	-0.972376	-1.81519	-1.16937	1.65954	1.37938	0.379566	-0.696044	-0.516285	-0.84565	0.314579	0.973179	0.220134	1.02558	2.15373	1.05832	-0.978004	-0.302119	-0.654656	0.547466	0.654319	1.33504	-0.989583	-1.09644	-1.44219	0.121643	0.208837	0.310519	-1.1209	-1.02616	0.161943	0.685546	0.341961	1.38749	-0.854877
ENSG00000115233	O00487	10213	PSMD14	-0.930121	0.597184	-0.134486	-0.573659	1.6331	0.982702	-1.11389	-0.557922	-0.960216	0.00556378	1.65345	0.0897677	-0.277592	-0.709972	-0.49796	1.62357	1.20707	1.00509	-0.113369	-1.74674	-1.06092	1.2169	-0.462412	-0.875136	0.506469	-0.575682	0.26415	1.7478	2.10193	1.35763	0.27922	0.465663	0.542802	0.619721	0.615686	1.40394	-0.963255	0.315492	-0.676192	-1.51671	-0.710208	-1.33355	-0.399206	-0.790106	-0.560824	-0.750477
ENSG00000109606	O43143	1665	DHX15	1.67489	0.138284	1.72939	-1.37945	1.31421	-0.0965514	-0.27574	-0.210595	-0.668618	-1.451	-1.34459	-1.83525	-0.542499	0.192215	0.523668	-1.14442	0.107139	0.276527	0.229206	1.57732	0.168474	1.05698	0.0376906	-0.077272	1.1195	-0.00637974	0.970162	-0.292119	1.3762	0.489899	0.633305	0.564093	0.676644	-0.52761	-2.04072	-1.52595	0.129832	0.262794	-0.499587	-0.675468	-0.779111	-1.22932	1.42091	1.90674	-0.333237	0.224942
ENSG00000101654	O43148	8731	RNMT	-0.662068	-1.15909	-0.656582	1.18576	1.57258	0.823995	-0.0740436	-0.911355	-1.26193	1.22671	0.600045	0.221877	-0.981557	-0.125133	-0.721962	1.66912	1.04565	0.978386	-1.0771	-1.38762	-1.42799	0.39943	0.317007	0.405862	0.329168	-0.396891	0.126485	1.38037	0.88716	0.742445	-1.7398	-1.01135	-0.599908	-0.945734	-1.50009	-0.563216	0.981812	-1.65835	0.538665	1.48206	-0.00599381	0.696661	-1.13896	-0.10358	0.293941	0.935694
ENSG00000074755	O43149	23140	ZZEF1	-0.933764	0.440918	-0.414068	0.814885	0.361762	0.301404	-1.1394	-0.383502	-2.17503	1.16915	2.34985	-0.156519	-0.396814	-1.39196	-0.827519	1.38657	1.17116	0.680578	0.3537	-0.49181	-0.227759	0.529726	-0.630699	-0.390863	-0.89126	-1.39146	-1.86748	0.6749	1.43323	0.46017	-1.71434	-0.914429	-1.40182	-0.394031	-0.309187	0.157475	0.855746	-1.13477	0.73378	1.23275	0.475713	1.01533	-0.376316	0.56188	0.935056	0.233891
ENSG00000151693	O43150	8853	ASAP2	1.67236	1.99649	1.35737	0.170489	-0.701283	-0.731512	0.0428934	1.25898	-0.456476	-0.102147	0.776987	-0.627962	0.740399	0.881225	-0.506444	-1.57632	-0.98509	-1.32109	0.0875685	0.768907	-0.505782	0.12095	-0.982729	-1.37779	-0.208826	0.476074	0.131754	1.91114	0.456494	0.647198	0.144129	-0.0679656	0.237472	1.83331	1.08058	2.11557	-0.13455	-0.0679656	-0.490172	0.0448506	-0.845185	-0.594999	-1.4941	-0.755792	-1.3469	-1.43175
ENSG00000164050	O43157	5364	PLXNB1	0.467253	2.48481	2.52309	-0.154236	-0.602143	-0.95623	0.395909	0.715672	-1.11367	-0.560787	-0.905752	-1.61918	0.376338	0.391363	0.18881	0.104737	-0.462902	-0.480883	0.250412	0.659336	0.409077	-0.229398	-0.952541	-0.929083	0.0658609	-0.216364	-0.0409612	-1.58832	-0.0100526	0.0361832	0.378074	-0.226859	0.502666	-1.64587	-2.04178	-1.84503	1.42047	1.0259	0.718795	0.210671	-0.247204	-0.287543	0.51698	1.61446	1.56553	-0.557208
ENSG00000198961	O43164	9867	PJA2	-1.73649	0.205984	-0.533244	0.627479	1.15757	1.17845	0.454686	-0.924989	0.151825	1.15197	1.63901	1.22528	-0.0670982	-2.04229	0.342742	0.112907	0.21517	0.258179	-0.455899	-1.51165	0.572854	-1.41231	-0.812421	0.202278	-1.29796	-1.21314	-1.24438	1.32342	1.15336	1.05304	-1.33101	-0.748658	-1.33637	1.17015	1.34812	1.43033	0.237667	-0.805985	0.420176	0.886556	0.198401	0.801781	-1.12217	-0.893118	0.190921	-0.344621
ENSG00000112365	O43167	9841	ZBTB24	0.758312	0.000798092	1.53497	-0.971569	-0.2727	-3.29265	-0.155591	0.11469	-2.03725	-0.203606	0.192898	0.395495	0.277975	-0.0621227	0.506858	0.538829	0.79733	1.39082	0.38673	0.177139	-0.549466	0.271522	0.174161	0.0264289	0.129583	-0.554332	0.148945	0.788417	-0.711965	-0.439219	-1.24796	-1.31829	-0.711965	1.02581	1.36433	0.9644	-1.18486	-1.60288	-0.700542	1.72104	0.989053	1.04206	-0.723412	-0.565432	-0.781038	1.49964
ENSG00000103018	O43169	80777	CYB5B	0.708464	0.620302	0.474544	1.02007	-0.00202615	0.137153	0.925471	0.637635	-0.195337	2.17346	1.79704	0.7666	-0.83112	-0.685948	-0.431106	0.860183	-0.396311	-0.483388	-1.39804	-0.944925	-1.19743	-1.20485	-1.09283	-1.25761	1.48018	0.606389	1.61399	1.27834	0.341561	0.620756	1.02557	0.718883	0.943272	0.752076	0.242941	1.0542	-0.926053	0.0989581	-0.650018	-1.03769	-0.899003	-1.19524	-0.50314	-0.823816	-1.3722	-0.978753
ENSG00000092621	O43175	26227	PHGDH	0.849394	1.15391	1.34297	-1.04797	-1.18906	-0.744289	1.25343	1.07039	1.01744	-0.849821	-0.456224	-0.888663	0.674869	1.21952	0.718818	-0.957278	-0.96949	-1.11172	0.724029	0.749073	0.665294	-1.12229	-0.883184	-1.21914	0.978483	0.786082	0.988207	-0.668357	-1.04662	-0.902621	0.536244	0.42026	0.667601	-1.63343	-1.53006	-1.06337	1.44799	0.544717	1.29605	0.378559	-0.925391	0.277395	0.461281	0.417486	1.13009	-1.31197
ENSG00000164258	O43181	4724	NDUFS4	-0.559856	-1.34889	-0.763456	0.620357	0.485827	0.411584	0.374703	-0.168859	-0.0308204	2.05074	1.58207	1.79817	-0.474614	-1.5555	-0.7753	1.62577	-0.213743	0.563298	-1.07794	-0.950627	-0.76457	0.0810165	-0.281661	-0.627701	-0.356609	0.838941	-0.929807	1.99597	2.17158	1.07421	0.239963	0.952955	-0.529466	0.267658	-0.898446	0.278931	0.372916	0.19109	-1.1045	-1.0703	-0.704733	-1.2269	-0.935159	1.26476	0.4695	-0.72484
ENSG00000112511	O43189	5252	PHF1	-2.02536	-0.87669	-2.09627	0.188637	0.0646749	1.16145	-1.01085	-0.527139	-0.189702	0.332435	0.804965	1.06246	-1.07775	0.824815	-0.53079	0.561384	1.64073	0.720204	-0.615968	-0.291827	-0.525422	0.101376	0.968956	1.33569	-1.83036	-1.15675	-1.73227	-1.00196	0.470477	-0.297125	-1.05178	-0.479436	-0.986029	-0.0916982	0.0106424	-0.776784	0.470477	0.591107	0.988821	1.08534	1.60125	1.07367	-0.418292	0.0632023	0.257666	0.276307
ENSG00000204410	O43196	4439	MSH5	0.0804605	-0.463927	0.243072	-0.132401	0.567261	-0.455476	0.701149	-0.345364	-2.18262	1.64768	1.39566	-0.589764	0.147892	-1.19825	-0.667075	2.0404	0.733213	0.843197	-0.347327	-0.900029	-1.26901	1.04179	0.0289572	-0.919491	0.492719	0.780229	0.462468	-0.453912	-0.302121	-0.617493	0.766609	0.464102	0.630484	-1.36441	-1.39336	-0.626772	1.15568	1.74169	0.689208	-0.331416	-1.27132	-1.28192	1.6039	1.59103	-0.0530489	-0.959069
ENSG00000108387	O43236	5414	SEPTIN4	-1.74174	-1.45533	-1.70855	0.64936	0.359689	0.547655	-1.29954	-1.12954	-0.805481	1.14066	1.04872	0.64648	-0.730214	-0.616817	-0.25823	1.05648	0.412021	0.826398	-0.34964	-0.208823	0.0877931	1.36938	0.681693	1.47758	-0.908451	-1.08969	-1.27436	-0.00585273	0.0454918	0.381553	-1.32923	-0.925489	-1.49674	1.03521	1.24742	0.556677	-0.732548	-0.589072	-0.24127	0.694785	0.625646	2.13214	0.740602	-0.729273	-0.771219	1.65355
ENSG00000135720	O43237	1783	DYNC1LI2	-1.85008	-1.92408	-1.94758	1.15982	1.71875	1.63215	-0.282819	-1.12485	-0.101224	0.779391	0.155194	0.0264141	-0.535208	-0.167318	-0.133743	0.203429	-0.185474	0.171474	-0.394599	0.156432	0.0676025	0.417445	1.12528	1.0336	-0.221006	-1.00852	-0.958292	0.478875	0.288822	0.26344	-0.592238	-1.05337	-0.401488	-1.58979	-1.51433	-1.70806	2.14056	0.37774	1.44821	0.526704	-0.0253285	-0.369496	1.24807	0.935242	1.14318	0.346646
ENSG00000138801	O43252	9061	PAPSS1	-0.393941	1.86495	-0.231766	-0.52531	-1.36903	-0.317665	-0.321125	0.315521	-0.212907	0.663461	1.41628	0.977538	-0.624022	-1.06042	-0.0869505	1.2862	1.961	1.48513	-0.89969	-0.728341	-0.392429	-0.957502	-1.1052	-0.743798	-1.1717	-1.71617	-1.72226	1.00286	0.711607	0.637185	-1.39313	-0.296641	-1.43034	0.871192	0.742197	1.31566	-0.613097	-1.1817	-0.0950574	0.702453	0.895371	0.793671	-0.0800693	-0.116856	-0.401427	0.355947
ENSG00000086827	O43264	9183	ZW10	0.695521	1.76662	0.95771	-0.705358	-1.51673	-0.43946	0.878436	1.73907	1.35499	-0.151391	-0.0551849	-0.557439	0.200966	0.0802296	0.554635	-1.24471	-0.300408	-0.962918	0.172326	0.584089	0.872729	-1.7403	-1.25328	-0.930143	1.35378	1.00912	1.43032	-0.141801	-0.405871	-0.52118	1.34283	1.03239	1.35974	-0.975708	-0.781702	-0.159691	0.947317	0.819827	0.235998	-0.732115	-0.997091	-0.997091	0.377397	0.271612	0.0254283	-1.16696
ENSG00000100842	O43281	10278	EFS	1.15323	0.638357	0.77253	-0.633523	-2.68486	-1.24861	0.62504	1.23353	0.42564	-1.05987	-0.655619	-1.38346	1.01255	1.05027	0.539562	-0.63154	-0.211352	-0.683711	1.12074	0.765313	0.495169	0.1869	-0.146047	-0.680234	0.758549	0.792635	0.740179	-2.06672	-2.00842	-1.57537	1.09988	1.10028	1.14106	-0.692362	-0.497798	-0.750512	0.568986	0.893918	0.825125	-0.636046	-0.165464	-0.37437	0.578517	1.14643	0.722943	-0.657131
ENSG00000167657	O43293	1613	DAPK3	1.45673	2.72777	1.16478	-0.00499755	0.330406	0.416294	1.22753	0.461136	0.125483	0.338598	-0.476646	-0.258219	0.325568	-0.412424	0.220807	-0.920305	-0.832105	-0.119378	-0.905009	-0.288513	-0.299862	-1.81185	-1.71287	-0.752925	-0.805646	-1.77618	-0.424626	0.0190538	0.723394	0.391457	-1.05198	-0.63385	-0.917054	-0.59772	-1.35637	-2.41775	1.17303	0.338787	0.57754	0.248154	0.590103	1.07862	1.3846	0.959121	0.408158	0.752428
ENSG00000140682	O43294	7041	TGFB1I1	-1.79197	-1.08626	-0.475235	0.584388	-0.380621	-0.0396165	-0.521232	0.377009	0.766818	-0.130972	-1.16516	-0.685008	-0.681275	0.799319	0.826387	-0.687262	-1.0485	-0.332631	0.747865	2.0885	2.16108	-0.846616	1.00144	0.519548	-0.575636	-0.796442	-0.0588546	-2.10992	-1.50487	-0.854109	0.137255	0.88152	0.410071	-0.782868	-1.28901	-1.2412	0.92079	1.0771	1.3158	-0.372135	-0.271976	-0.0423031	1.44385	1.20997	1.35084	0.439829
ENSG00000165868	O43301	259217	HSPA12A	-1.35202	-0.575203	-1.47276	2.00445	1.50462	1.93193	-0.931712	-1.22026	-0.960322	0.760601	-0.373542	-0.17588	-0.211276	-1.00848	-0.448053	0.213856	0.109132	0.257353	0.604508	-0.422295	-0.498084	0.146196	0.751237	1.36599	-0.322873	-0.407685	-0.842307	1.31422	1.89717	1.88662	-1.44501	-1.63876	-1.68394	0.183868	0.306158	0.302373	-0.100128	-0.825464	-0.429702	0.828635	0.636907	0.505151	-0.663426	-0.994141	-0.355592	0.919914
ENSG00000134030	O43310	9811	CTIF	-0.0636364	-0.352511	-1.59601	1.22237	1.66927	2.20388	-0.923421	-0.246887	-0.866783	-0.227265	0.614564	0.208381	-0.715007	-0.747852	-0.814603	0.19627	0.933763	0.72803	-0.439888	-1.02945	-1.26941	1.69289	-0.341552	0.164853	-1.31408	-1.30938	-1.00225	1.09984	1.52988	1.24824	-1.24779	-0.934468	-1.31745	0.64493	0.613171	0.715869	-0.756419	-0.924874	0.0206987	0.648218	0.743821	0.855913	-1.46455	-0.562527	0.062993	0.737524
ENSG00000135097	O43347	4440	MSI1	1.66711	1.5092	1.23588	-0.761918	-0.7138	-0.656987	1.25745	1.52436	0.81122	-1.17711	-0.970696	-0.842747	1.00655	0.340561	0.715821	-1.16464	-0.969623	-0.899312	0.130899	0.0619503	0.470978	-0.77229	-1.10368	-0.699172	0.748054	1.20444	1.14688	-1.39858	-1.20356	-0.706644	1.24758	1.02577	1.52623	-1.04363	-0.900327	-1.26574	0.573643	0.648338	0.933474	-1.1573	-1.00741	-1.01553	0.701308	0.914243	0.388593	-0.0668696
ENSG00000125944	O43390	10236	HNRNPR	-1.66947	-1.409	-0.218037	0.238926	1.69421	0.792592	-1.08985	-0.763345	-0.25672	-0.277336	-0.342532	-0.0810525	-1.19374	-0.384693	-0.604066	0.468843	1.09746	1.47097	-0.864856	-0.0449321	-0.682287	1.17072	1.21985	1.72835	1.48718	0.0179319	0.0879174	-0.743437	-1.25869	-0.966148	1.28294	0.949961	1.23866	-0.666155	-0.444092	0.142307	-0.0190097	1.18221	-0.780649	-1.1832	-0.742939	-0.931005	1.76582	1.88093	-0.596302	-0.319
ENSG00000101150	O43399	7165	TPD52L2	1.41284	1.83009	1.73589	-0.15903	-0.508505	-1.32489	1.16282	0.543983	0.128444	-0.647717	-0.595219	-1.87283	0.823762	0.769973	0.48681	-0.652928	-0.736816	-1.13306	-0.162138	0.640021	0.377333	-0.667139	-0.0864216	-1.36527	-0.812677	-1.26558	-0.516158	-0.110058	0.678602	0.0756133	-0.677982	-1.08324	-0.793549	-1.6848	-1.23225	-0.875138	1.00704	0.514651	1.35877	0.258671	-0.107378	0.923541	-0.778296	-0.159215	1.91757	0.577324
ENSG00000117419	O43414	79033	ERI3	-1.28919	0.666697	-0.427784	0.0464271	1.31244	0.380755	-1.3989	-0.300866	-1.36568	0.775946	0.696756	0.269788	-1.49229	-0.315126	-0.518373	1.81004	0.617839	-0.192053	-1.08913	-1.25809	-0.435739	1.05014	0.781235	1.67517	0.819171	-0.678451	0.551691	1.0124	0.475435	0.801672	-0.250031	-0.0420486	0.0577296	0.894546	1.09269	1.69046	-1.844	-0.413597	-2.02218	-0.118766	-0.36103	0.139564	-1.06369	-1.10734	-1.71099	0.428558
ENSG00000137492	O43422	5612	THAP12	-1.61786	-1.79889	-1.81981	-0.13567	-1.98751	-0.140167	-0.095326	0.376034	-0.259571	1.05802	0.320327	0.474643	-0.00321938	-0.232203	0.33867	1.01997	1.80133	0.652603	0.503573	0.201195	0.68863	-0.127297	-0.660186	1.44271	0.694514	0.340629	1.86266	-1.10105	-0.380548	-1.23212	0.148447	-0.402478	0.313946	-1.76336	-1.75855	-2.00684	0.750928	-0.444516	0.156409	0.47678	-0.0999412	0.27571	1.31613	0.907196	0.584469	1.00649
ENSG00000159082	O43426	8867	SYNJ1	-1.28947	-1.04362	-0.842775	1.30152	1.43887	0.519714	-0.79775	-0.603954	-1.46015	0.956647	1.58901	0.227764	-0.687706	-0.812356	-0.873552	0.951084	1.38225	0.92902	-0.680699	-0.86333	-0.945069	1.01043	0.248414	0.345704	-1.29693	-1.46411	-1.26768	1.36988	1.42886	1.22478	-1.19159	-1.01571	-1.19509	0.563228	0.0968351	0.852456	-0.811867	-0.502465	-0.55374	0.852902	0.909251	0.875533	-0.499933	-0.522827	-0.56154	0.659195
ENSG00000172500	O43427	9158	FIBP	1.59743	2.18681	-0.0781818	-0.773756	0.20641	-0.619189	-0.487825	-0.119103	-1.11945	-1.32169	-1.78456	-0.0653064	1.11086	-1.18097	0.252032	-0.910913	-6.1273e-05	-0.789567	0.675773	0.0222879	0.208683	1.59602	0.816961	0.577306	-1.27893	-1.496	-1.23298	1.0452	0.604545	0.957177	-0.945121	-0.179275	0.0346695	1.18796	0.888104	1.52987	-1.56648	-0.352266	-1.03901	0.754076	0.84182	0.183836	-0.918148	-0.777096	-0.884133	1.28127
ENSG00000078699	O43439	9139	CBFA2T2	-0.030899	-1.6786	-0.21719	-0.642393	-1.10898	-1.80333	1.52437	0.631041	0.675856	-0.135828	-0.955183	-1.9497	0.787375	1.02348	1.00134	-0.903604	0.172994	-0.421392	1.10021	0.446949	0.935523	0.115967	0.321953	1.11003	-0.918932	-0.33936	-1.48013	-1.24028	-0.575293	-0.206162	0.232893	0.344644	0.195839	-1.507	-1.64736	-1.24416	0.625972	0.744519	1.03677	0.0482999	-0.342457	-0.473953	0.625972	1.23464	1.69722	1.17048
ENSG00000115317	O43464	27429	HTRA2	-0.516404	-1.52515	-1.60196	0.479037	1.0824	0.302666	-1.68476	0.0471242	-1.02226	-0.209426	1.14803	-0.641355	0.335996	-0.35651	-0.609054	2.11375	0.367567	0.503995	-0.0932843	-0.442565	-0.661275	2.02268	0.596368	0.364393	-1.33366	-1.87305	-0.859305	0.103905	0.548219	0.211327	-0.160503	-1.56249	-1.04804	1.29744	0.950168	0.950168	-0.343653	-1.16967	0.724597	0.824528	1.12612	1.63772	-1.05065	0.595666	-0.909506	0.583183
ENSG00000053371	O43488	8574	AKR7A2	-0.706953	1.71829	0.923875	-1.42929	-0.590697	-0.36805	-0.167897	1.20428	0.453453	-1.67869	-1.10995	-0.7633	0.719251	0.514652	1.36645	-1.27208	-0.477797	-0.198909	-0.254449	0.862208	1.92448	-0.859116	0.24814	-0.0579033	1.22994	1.74143	1.54799	-0.206529	-0.642459	-0.128942	0.827519	1.69423	1.1974	-0.21223	-0.274511	-0.55796	-0.114548	1.1508	-1.17522	-1.07752	-0.756699	-0.736218	0.655123	-0.356034	-1.52263	-0.508387
ENSG00000079819	O43491	2037	EPB41L2	0.624588	0.575358	0.169255	-0.823144	-1.48678	-1.27721	0.590787	0.517592	0.134403	-1.13528	-1.39756	-1.25856	1.25288	0.38533	0.882454	-1.12627	-1.05994	-0.706109	0.279186	0.625184	1.42337	-0.0912395	1.15983	1.74187	0.494846	0.466965	0.300428	-0.911459	-0.223352	-0.735198	0.63613	0.436345	0.495544	-1.85973	-2.22863	-2.58418	0.90052	1.12926	0.196582	-0.169969	0.782185	-0.203241	0.759439	0.393091	0.242375	1.16113
ENSG00000152291	O43493	10618	TGOLN2	-0.964978	-0.393522	-0.854145	1.49612	0.641728	0.177073	-0.134623	-2.22793	-1.19538	1.73071	1.92369	-0.805891	0.0882762	-0.967894	-0.199988	1.58404	0.474617	0.319886	0.373142	-0.465516	0.364878	-0.0461517	-0.538562	-0.379589	-1.92119	-1.66759	-1.06983	-0.384382	0.512474	0.0930701	-1.12751	-1.30066	-1.09586	-0.232504	-0.188032	-0.208433	0.829856	-0.547444	0.0261451	1.25275	0.590283	0.736159	0.798844	0.178579	0.34634	1.59215
ENSG00000174684	O43505	11041	B4GAT1	-0.676664	0.974262	-0.0350448	1.3514	1.18194	0.765708	-0.24312	0.0884868	-0.763206	1.18432	1.79671	0.691103	-0.885084	-1.41803	-0.832241	1.00545	0.907406	0.454103	-1.1132	-1.84212	-0.430746	-0.459469	-0.94935	-0.752617	-0.547477	-0.401577	-0.0336466	1.84077	1.7568	1.54918	-0.360479	-0.474989	-0.592188	1.0853	1.31628	1.32112	-1.37924	-0.34759	-0.866852	-0.0849099	-0.213479	0.429383	-1.12109	-1.40286	-1.22669	0.162468
ENSG00000118689	O43524	2309	FOXO3	1.28597	-0.476091	-0.406883	-2.41598	-0.891766	-0.271149	-1.06639	-0.709529	-0.202838	-0.701605	-0.737122	-0.238786	0.459166	-0.154647	0.421979	-1.23017	0.228267	0.42096	0.258617	0.988625	1.92113	1.52265	0.627751	1.36784	-1.13809	-0.963576	-1.01372	-0.705757	-0.62828	-0.825423	-1.20605	-0.74362	-0.584266	-0.787421	-0.623028	-0.888919	0.33595	-0.466294	0.125401	1.36123	1.07503	0.72524	1.08091	1.08813	0.0199284	1.54526
ENSG00000112667	O43598	10591	DNPH1	1.56264	1.72298	1.37231	-1.77307	-0.458127	0.812062	-1.22414	1.4022	0.718299	-1.48237	-0.370071	0.0654672	0.297946	-0.942676	0.580733	-1.31647	-0.80143	-0.237662	0.142066	0.262841	0.883818	-0.811477	-0.113165	-0.292701	1.70327	1.70824	1.6987	-0.425052	-0.373619	-1.58152	0.898193	0.365026	1.38041	0.196267	0.0870957	0.0312055	-0.238159	0.673032	-0.0252783	-2.02365	-0.616463	-0.535568	0.601623	-0.357875	-0.60381	-0.79529
ENSG00000077279	O43602	1641	DCX	-1.64965	-1.69138	-1.7669	1.034	1.00666	1.34863	-0.879698	-1.64291	-0.47136	0.957417	0.186818	0.580196	-0.791031	-0.531522	-0.452453	0.794144	0.423091	0.569814	-0.121788	0.391125	-0.168288	0.583995	1.11204	1.17904	-1.52394	-2.0634	-2.19656	0.581464	0.74378	0.622565	-1.23533	-0.653325	-1.2137	0.255658	0.350405	0.330761	-0.0302102	-0.587915	-0.239926	0.950643	0.885248	0.653053	0.490458	0.784023	0.0597735	0.96272
ENSG00000071051	O43639	8440	NCK2	-1.0087	-0.771781	-0.616623	-0.296866	-0.30805	0.152601	-1.20439	-1.36296	-0.708387	-0.00410588	0.927182	0.58224	-0.702098	-1.01483	-0.169948	1.16389	1.66194	1.3745	-1.13384	-0.613894	-0.274533	1.84311	1.1717	1.31385	-0.71513	-0.909697	-1.27059	-0.749229	-0.0849583	-0.336679	-0.842217	-1.03547	-1.21953	0.921657	1.21501	0.342415	-0.702821	-0.844143	-0.593553	1.27993	1.4874	1.65395	-0.654059	-0.396316	-0.331759	1.1925
ENSG00000000003	O43657	7105	TSPAN6	-0.0807199	-0.107379	0.330571	-0.243045	0.485086	0.193334	1.75476	-1.51293	0.548543	-0.692345	-2.25572	-1.44011	0.7604	0.822212	1.24067	-0.950692	-1.28058	-0.663353	0.935567	1.01368	0.932062	0.570364	0.201425	-0.561811	1.02806	0.886564	1.16496	-1.31506	-0.79269	-0.623072	1.15561	1.07481	1.22454	-2.08764	-1.84642	-1.78101	0.704102	0.801446	0.460144	-0.295163	-0.384711	-0.123636	0.490529	0.302207	0.237644	-0.262461
ENSG00000198901	O43663	9055	PRC1	1.01151	1.13573	1.79703	-0.520191	-1.35787	-1.46716	0.373843	1.64884	-0.102208	-0.673501	-0.303916	-1.46472	0.846515	0.444084	0.455938	-0.520733	0.0579542	-0.00714176	0.921376	0.750166	0.0968258	-0.150391	-1.05346	-1.91852	0.955421	1.14369	1.05395	-1.09721	-0.749744	-0.484346	0.854618	0.931679	0.881731	-1.38887	-1.19074	-0.903264	0.910962	1.20221	0.453163	-1.40639	-0.758716	-0.990155	1.17717	1.36545	0.276338	-0.528426
ENSG00000010244	O43670	7756	ZNF207	0.553636	0.879249	2.48004	-1.20096	0.075745	-1.31781	0.0909596	0.311583	-1.39531	-0.671281	-0.799033	-1.61874	0.616723	-1.12268	-0.269338	0.475745	0.993755	0.575591	0.438124	-0.401484	-0.428827	1.68486	-0.281883	0.331339	0.986532	0.198746	0.822716	-0.525849	0.487831	-0.549053	0.195679	-0.0633662	-0.123286	-1.32993	-1.81835	-2.11359	1.28272	0.168773	2.14067	0.16132	-0.630417	-0.698306	1.04778	0.472007	1.19169	0.0938076
ENSG00000136521	O43674	4711	NDUFB5	-0.773021	-0.653867	-0.394065	0.732583	0.369081	-0.140461	0.348071	0.212445	-0.852823	2.07326	1.94595	1.01327	-0.589405	-1.6131	-0.596274	1.9923	0.306445	0.428603	-1.14958	-1.05336	-0.901076	0.070155	-0.284433	-0.490705	0.305789	0.878578	0.0156871	1.02784	1.84214	0.609636	0.169146	0.106535	0.511932	0.360473	0.472555	1.24926	0.807477	0.014489	0.491733	-1.38089	-1.69251	0.296713	-0.559149	0.0805695	-0.620324	-1.73248
ENSG00000119013	O43676	4709	NDUFB3	-1.27502	-0.784134	-0.979117	0.601381	0.558273	0.798088	0.271523	0.165416	0.329899	1.90069	2.07697	1.59351	-1.00576	-1.41708	-0.699432	1.25905	0.170156	0.122004	-0.325933	-1.09148	-0.814892	-0.499486	-0.54869	-0.405938	0.851853	-0.211634	0.511833	0.733417	0.15931	-0.0645302	1.60245	1.16265	-0.733024	0.508136	0.763181	1.60725	-1.07824	-0.065935	-1.35009	0.363383	-0.0365288	-0.821404	0.476586	1.10922	-1.77463	-0.74039
ENSG00000131495	O43678	4695	NDUFA2	-1.02967	-0.143668	-0.951611	0.479949	-0.0224785	1.10863	0.218429	0.356577	0.299432	2.34777	1.56237	1.19056	-0.995285	-1.34163	-0.750564	1.33786	0.665663	-0.00378906	-1.0565	-1.43682	-0.915197	-0.317937	-0.425926	-0.176176	0.759656	0.721979	0.441855	1.29522	0.662318	0.948837	1.31716	0.219663	0.152966	0.6001	0.802381	1.09787	-1.07343	0.625435	-1.4799	-0.678344	0.444786	-0.972752	0.0608518	-0.85761	-2.32761	-0.397544
ENSG00000154473	O43684	9184	BUB3	0.544243	-1.00687	0.83377	-1.06768	0.156679	-1.01806	0.176897	-0.874926	-0.835111	-1.76017	-0.188761	-2.01395	1.07067	-0.0571438	0.769395	1.06734	0.54787	1.20075	1.66645	-0.385935	0.480428	1.24084	-0.83959	0.292862	1.19695	0.313229	1.32276	-1.78945	-1.1892	-0.759448	0.463037	0.656997	1.26334	-1.15497	-1.35421	-0.901247	0.912036	1.08536	0.431122	-0.696198	-1.29597	-0.619451	1.24656	1.20041	0.491634	-0.530105
ENSG00000170855	O43715	51499	TRIAP1	0.444198	0.801879	1.13008	-0.556174	-0.862405	-2.53699	1.22174	0.553385	-1.13467	1.24861	0.191419	0.0692001	-0.163193	-0.754953	-0.533185	1.49167	1.11117	1.34571	-1.1595	-0.21858	-0.631678	-0.0613503	-0.135279	-0.861099	0.113013	0.17378	1.62787	-2.42634	-0.664869	-1.42015	0.82112	0.496128	0.3987	-2.26279	-1.2385	0.0926191	0.152329	-0.621515	1.17838	-0.157733	0.638757	1.06564	0.137141	0.386561	0.154857	0.628266
ENSG00000102241	O43719	27336	HTATSF1	1.72774	2.29587	1.63405	0.224111	-0.600957	-0.517138	1.36605	0.383507	-0.947913	0.0447482	-1.03917	-0.723633	0.635155	-1.20087	-0.32227	0.601484	0.530939	-0.277753	-0.0377236	-0.424728	-1.16767	0.0240803	-1.43882	-0.769074	1.03209	-0.712991	0.236717	2.28888	1.32369	0.996003	-0.375064	-0.607663	-0.272519	-1.16514	-1.89237	-0.29309	-0.65332	-1.08594	-1.18202	0.982434	0.0637189	0.333838	0.775324	0.746232	-1.0979	0.679126
ENSG00000166747	O43747	164	AP1G1	-0.494298	0.130769	1.31694	-0.875818	0.432022	-0.761199	-1.04044	-0.843285	-1.81832	1.20872	1.40725	0.176086	-0.603709	-0.696385	-0.622976	1.90259	0.0182536	0.679904	-0.0596892	0.00914013	-1.22228	1.78782	0.649453	-0.680542	-1.06026	-1.97136	-1.4988	0.704282	0.779638	0.544013	-1.79173	-0.925323	-1.45355	0.118499	0.142805	0.789495	-0.277413	-0.579009	0.152257	1.12353	0.263134	0.317075	0.279264	0.118499	0.866624	0.506272
ENSG00000135823	O43752	10228	STX6	0.23159	-0.512546	-2.4046	-0.0658174	-0.0693878	0.535989	-1.43929	-1.23249	-0.888219	0.197329	1.13307	0.515569	0.0755433	-0.897891	-0.674107	0.816528	0.449037	0.282153	-0.570572	-0.202529	0.390436	2.41756	0.617201	1.29545	-1.51234	-1.4679	-1.54313	-0.678819	-0.892171	-0.505653	-1.1354	-0.770235	-1.03231	0.69528	0.892923	0.813913	-0.0827677	-0.944321	-0.0141875	1.36695	0.231631	1.05694	0.523844	0.659037	0.581114	1.02182
ENSG00000100321	O43759	9145	SYNGR1	-0.900356	-0.516892	-0.85468	0.771392	-0.765249	-0.890078	-1.23857	-0.505612	-0.330864	0.607929	1.46184	1.12415	-0.686263	0.967765	-0.896063	1.21761	0.794696	-0.277063	-1.58244	0.619887	-1.19245	2.08462	0.545031	0.441666	-1.57811	-1.62065	-1.28956	1.01548	0.633787	0.85345	-0.785565	-0.471942	-1.06077	1.425	1.33089	1.13789	-0.598937	-0.823241	-0.53361	1.08372	0.744686	0.592198	-1.07679	-0.508204	-0.673099	0.566181
ENSG00000108639	O43760	9144	SYNGR2	1.33704	1.72639	1.98358	-0.727382	-1.36041	-1.94586	0.702124	1.01726	0.523946	-0.457301	0.840449	-0.413309	0.549994	0.447769	0.134578	-0.611606	-0.819488	-1.344	-0.280215	0.65686	-0.572985	0.0465445	-0.696626	-0.737352	0.628848	0.33715	1.51	-0.097042	-1.60478	-1.2213	0.246107	0.610076	0.181366	1.16816	0.511111	0.572165	0.0852327	0.485015	-1.10016	1.30975	0.288481	1.11587	-1.15722	-2.5213	-0.463355	-1.12855
ENSG00000104969	O43765	6449	SGTA	-0.732859	-0.144379	-1.24838	0.695839	1.22666	0.994479	-0.704679	-1.34172	-1.45716	1.2249	0.881689	0.202496	-0.486239	-1.35163	-1.14754	1.72184	0.646021	0.0386685	-0.433201	-0.526858	-0.659619	1.77771	0.372681	0.45127	-0.993694	-1.3512	-0.901842	1.64832	1.28741	1.76773	-0.635323	-0.977871	-0.678655	1.25441	0.273917	0.952488	-1.20854	-0.790405	-1.01207	0.223889	1.0318	0.330198	0.00113665	-0.345055	-1.47835	0.508856
ENSG00000128641	O43795	4430	MYO1B	1.42346	1.05371	1.305	0.185598	-0.101461	-0.501607	0.644089	0.314353	-0.262929	-0.953154	-1.00015	-1.54209	1.56468	0.103359	0.72915	-1.24399	-1.09426	-0.939871	0.308287	1.68174	0.717391	-0.845765	-0.0558205	-1.48971	1.1337	1.1449	0.787233	0.0905049	0.639218	0.343038	0.905326	0.723291	1.07632	-1.48547	-1.89855	-1.68446	0.447311	0.608351	0.403503	-0.78443	-0.839062	-1.06895	1.09615	0.883146	0.357171	-0.970287
ENSG00000176101	O43805	8636	SSNA1	1.09749	1.82241	1.55615	-0.855517	-1.24338	-0.859249	1.18035	1.08331	0.388028	-0.428379	-0.815892	-1.04218	0.877284	0.691596	0.374052	-0.597008	-0.407692	-0.613553	0.822475	0.608533	0.180558	-1.13554	-1.59351	-1.09034	0.716331	-0.0646135	1.17922	1.18357	-0.577164	0.63535	0.741812	0.320624	1.01835	1.38372	0.680271	0.973346	-1.43377	-0.371568	0.0387255	-0.228851	0.779353	-0.208754	0.493482	-1.34855	-1.15679	-1.82955
ENSG00000115365	O43813	10314	LANCL1	-1.78866	0.884815	0.316505	-1.10703	-0.726769	-1.59314	0.087374	1.32574	-0.478776	1.06083	1.79034	0.163966	-0.884006	0.547141	-0.414369	1.2191	1.30818	1.13477	0.0856358	-0.91773	-0.763283	-0.982358	-0.360908	0.0926374	-0.0930898	-1.38945	0.703996	0.965188	0.715386	0.626062	-0.250973	0.671244	-0.0255083	1.50106	1.48676	2.14133	0.0688845	-0.293608	-0.565712	-0.272694	0.632973	-0.434603	-1.53413	-1.40063	-1.72527	-0.403524
ENSG00000105127	O43823	10270	AKAP8	-0.0393601	0.782439	1.54406	-0.00255158	1.1067	-0.275551	1.23637	-0.758954	0.444263	-0.757966	-2.33072	-1.94622	0.8634	1.45433	0.783609	-0.680833	-1.03617	-0.199496	0.154707	0.864208	0.0463322	-0.762308	-0.0463427	-0.443948	0.168062	-0.563397	-1.12535	-1.12325	0.218933	0.103016	-1.13377	-0.82393	0.614581	-1.3088	0.0771488	-2.68113	1.18716	0.763191	1.35647	0.196941	1.02047	0.181669	0.3773	0.0702325	1.72414	0.3773
ENSG00000178605	O43824	8225	GTPBP6	1.33268	0.868743	1.89767	-0.649274	-1.51767	-1.39465	1.84192	1.81979	0.059794	0.0824376	-0.566149	-0.128296	0.467256	-0.752797	-0.0575881	-0.0266174	-0.900699	-0.173352	0.0360176	0.622657	-0.12169	-0.434826	-0.787976	-1.51737	0.804222	0.997974	1.32423	-2.05445	-0.585173	-1.06127	0.986729	0.492181	1.1617	-0.832827	-1.23488	-1.50803	0.346845	-0.281475	0.30185	-0.645793	-1.04605	1.11493	-0.17039	1.10802	1.04974	-0.892004
ENSG00000101365	O43837	3420	IDH3B	-1.16092	-1.08306	-0.932061	0.515097	0.251061	0.0993138	-0.775654	-0.527223	-0.979346	1.39444	1.21057	0.995993	-0.879773	-1.41753	-0.699124	2.00467	0.967687	0.90933	-0.926775	-0.661105	-0.733082	1.02821	0.93188	0.467408	-0.361426	-1.85481	-1.60815	-0.11769	0.476192	0.569286	-0.477347	-0.639229	-0.400058	-1.42982	-1.06699	-0.257401	0.954357	-0.924811	0.603868	-0.872168	0.239427	0.431407	0.814634	1.43977	1.97633	0.504588
ENSG00000078618	O43847	4898	NRDC	1.63592	1.61766	2.53587	0.185845	0.0868319	-0.606606	0.433428	0.202397	-0.751268	0.0120166	-0.464296	-1.06345	0.860487	-0.752303	0.180032	-0.587202	-0.892761	-0.367893	0.856045	0.354023	-0.0692286	-0.194486	-1.77003	-1.44104	-0.256461	-1.26455	-0.683264	2.06714	0.452658	1.53077	-1.07872	-1.70614	-0.0435281	1.28634	0.702964	2.00618	0.114853	-0.547804	-0.245905	0.371126	-0.796863	0.0548725	-0.912465	-0.585249	-0.895567	-0.312067
ENSG00000128595	O43852	813	CALU	-0.0413609	1.57935	0.938204	-0.160344	-0.702771	0.12816	1.12459	0.96653	1.38047	0.253471	-0.315529	-0.500714	0.575212	1.39367	0.740589	-1.21112	-1.12855	-0.875927	-0.0574235	0.299669	0.382618	-1.99638	-1.09373	-1.67868	0.823489	0.691957	1.24956	-0.492372	-1.49776	-0.933051	0.594114	0.766565	0.755863	0.0273365	-0.534331	-0.105649	1.35064	1.17819	1.6096	-0.603431	-1.06243	-0.920227	0.323658	-0.153159	0.939108	-0.967754
ENSG00000012232	O43909	2137	EXTL3	-0.955313	0.00251558	-0.525409	0.314066	-0.369807	-0.0867881	-0.61062	-0.167583	-0.569058	1.91344	1.40467	0.827213	-1.24909	-0.70227	-0.734409	2.01439	0.896426	1.3835	-1.89128	-0.618804	-0.99824	0.368546	0.208746	0.145168	-1.22692	-1.00397	-0.299009	0.442662	0.0486323	-2.00358	-0.117868	0.1675	0.426997	1.61116	0.694568	0.543012	-0.792294	0.149786	0.458295	-1.14605	0.261289	-0.849294	-0.677898	-0.498974	-0.154679	2.20826
ENSG00000164815	O43913	5001	ORC5	1.18489	1.10386	2.45834	-0.758021	-1.59087	-2.09243	0.671433	0.759632	-0.235669	-0.423938	-0.697403	-1.8175	-0.0655415	0.665641	0.361063	0.523692	0.546101	0.231351	0.229312	-0.425514	-0.253465	0.244495	-0.160962	-0.458499	1.26616	0.512055	0.370492	-1.36521	-0.384197	-1.44224	-1.47487	0.835933	1.01671	-0.0997293	-0.908934	-1.12235	0.898687	0.657821	0.317235	-0.287165	1.27815	0.1725	-0.326569	-0.685572	-2.09694	0.785408
ENSG00000156973	O43924	5147	PDE6D	-0.587238	-1.81164	-0.119286	0.0122702	1.42173	-0.508973	-1.49873	-1.38323	-1.58073	-0.111568	0.577323	-0.243271	-0.586602	0.574784	-0.0945234	0.391407	0.457575	1.81154	-0.369939	0.809407	-0.629963	1.67959	1.08935	0.700715	-1.57885	-1.03951	-0.865735	0.491777	1.16243	1.4672	-0.517043	-0.239752	-0.619049	1.63043	1.21143	1.39265	-0.673013	-0.714208	-1.43262	0.511158	0.699462	0.688743	-1.0893	-0.398453	-1.36436	0.487456
ENSG00000115947	O43929	5000	ORC4	0.75066	2.17899	2.07794	0.167639	-1.3622	-1.69557	0.436692	1.77178	-1.02718	-0.585419	0.146371	-0.697661	-0.0094138	-0.153082	0.0891036	-0.331317	0.709383	0.346161	0.460291	-0.812269	-0.422109	-0.415264	-1.0011	-0.622413	0.435597	-0.0651608	-0.894651	1.25078	0.648426	0.936026	-1.95802	-0.633461	-0.632816	-0.29897	-1.26289	-0.583318	0.060378	-1.49278	-0.369923	0.999761	0.601664	0.902414	-1.47169	-0.110783	-0.155601	1.19315
ENSG00000164754	O60216	5885	RAD21	1.77971	0.687318	1.97808	-0.929113	-1.04177	-1.51223	0.2099	1.31658	0.208197	-1.31864	-0.494355	-1.31354	1.14715	0.237793	0.181349	-1.27203	0.141088	-0.180716	0.731659	0.421279	-0.0683679	0.713699	-0.634483	-0.988568	1.21692	1.1748	0.788547	-0.00416718	0.538207	0.0164096	0.301081	0.191402	0.376324	-1.61307	-2.19457	-1.62955	0.52164	1.07161	-0.195901	-0.662267	-0.563964	-0.755778	1.67936	1.50337	-0.259239	-0.606335
ENSG00000160145	O60229	8997	KALRN	-1.34835	-1.45027	-1.54395	1.00653	1.55664	1.37415	-0.737143	-1.24851	-0.934842	0.574718	0.422367	-0.229477	-0.459632	-0.484695	-0.540572	0.521711	0.61951	0.642688	-0.360088	-0.313058	-0.884282	1.55773	0.991213	1.26761	-1.4123	-1.85478	-1.53722	0.57797	1.03219	0.689518	-1.02363	-0.647887	-0.955775	-0.568296	-0.624064	-0.384018	0.582471	-0.561115	0.157737	0.97391	0.663312	0.384582	-0.630203	-0.109438	0.885456	1.15309
ENSG00000204560	O60231	8449	DHX16	0.90244	0.566802	0.68615	-1.8365	-0.71317	-0.257056	-1.01951	0.85852	1.19012	-2.60398	-1.3257	-0.588697	0.726651	0.394043	0.464008	-0.328111	0.216259	-0.487792	1.54111	0.611424	1.01972	0.0345397	-0.404032	0.352767	0.309547	0.595221	-0.772191	-0.544668	-1.44312	-0.614455	0.211971	-0.289127	1.90519	-1.1516	-2.08014	-1.54002	0.953217	0.270241	1.09372	0.0684495	0.360143	0.0519128	0.85708	1.92352	0.511137	-0.0373122
ENSG00000173465	O60232	10534	ZNRD2	0.838316	1.03389	0.16662	-0.0717279	-1.06151	-1.31667	-0.499444	-0.554096	-1.17882	-0.755066	-0.0410011	-0.516221	0.329851	-0.0881489	-0.396793	3.26944	1.10831	0.944808	-0.887128	-0.795384	0.184592	0.771599	-0.629669	0.144247	-0.259694	-0.691795	-0.266147	1.77833	0.163816	0.244416	1.03513	0.675801	0.842695	0.61897	-0.567586	2.57959	-0.733568	-0.195719	-0.0583948	-0.195719	-0.539874	0.688096	-1.91531	-1.78973	-0.2008	-0.897512
ENSG00000153147	O60264	8467	SMARCA5	2.03325	-0.455151	0.773544	-0.127654	-0.204699	0.0414728	0.773768	0.639287	1.86541	-1.26727	-1.54365	-1.00812	0.757794	0.383746	0.483032	-1.65922	-0.903207	-0.587295	0.626122	1.24386	0.313211	-0.839392	-0.642714	-0.696138	1.56167	1.65501	1.38534	-0.396478	-0.117058	-0.349374	1.03062	0.624892	1.06497	-0.958789	-0.919833	-1.21789	0.42646	0.395687	0.707533	-1.02295	-1.35815	-1.73431	0.955967	0.564651	-0.356065	-0.162944
ENSG00000135709	O60268	9764	KIAA0513	-1.18035	-0.950802	-1.18173	0.0776496	0.635867	0.643828	-0.922126	-0.974812	-0.596033	1.00027	1.3172	1.09728	-1.00235	-0.861309	-0.584257	1.47667	1.39905	1.38844	-0.886957	-0.993962	-0.989732	0.68487	0.590855	0.812433	-0.409528	-1.26202	-1.1713	0.79397	0.50664	0.356816	-1.02258	-0.34567	-1.08188	0.479213	0.940343	0.548927	-0.562616	-0.655703	-0.852854	1.71654	1.41397	1.30827	-1.44861	-1.04894	-1.01969	0.797962
ENSG00000008294	O60271	9043	SPAG9	-1.40566	-2.39234	-1.65319	0.0177246	1.90858	0.983367	0.294031	-0.819446	-0.380824	0.445241	-0.130295	-1.09136	0.676997	0.386479	0.694072	-0.0446665	-0.818684	-0.395849	0.830253	1.47046	0.579355	0.726386	0.12375	-0.00439137	0.158381	0.0175254	-0.278208	-1.29268	-0.297534	-1.30996	-0.0151836	0.601684	0.333897	-1.73474	-1.73749	-1.6113	1.43604	1.16948	0.855658	-0.537572	0.0223163	-0.777719	0.690156	1.60077	0.919002	0.523657
ENSG00000188994	O60281	23036	ZNF292	1.67546	0.659074	1.03679	-0.103366	-0.180625	-1.4605	0.382771	0.814955	-0.712818	-1.43961	-0.729242	-2.58654	1.09033	1.33568	0.158448	-1.0612	0.238779	-0.0700139	0.690306	0.567444	-0.760713	0.569003	-0.0427866	-0.0716266	-0.448831	-1.09294	-0.997199	-0.176949	0.313214	-0.266737	-1.47617	-0.950533	-0.79583	-1.69972	-1.52121	-0.997921	1.60789	1.10237	0.91408	0.656323	0.567055	0.0203566	0.37001	0.789591	1.16629	0.87
ENSG00000168280	O60282	3800	KIF5C	-1.23455	-1.42784	-1.26125	1.18956	1.77492	1.21853	-0.72031	-1.04341	-0.864634	0.856957	0.952054	0.576059	-0.894174	-0.507028	-0.573533	0.788307	0.753613	0.763553	-0.7147	-0.912911	-1.05002	0.959918	0.649042	0.721832	-1.44727	-1.85271	-2.02345	1.09732	1.46877	1.17933	-0.526907	-0.387501	-0.772895	0.755394	0.707862	0.463382	0.0202154	-0.238447	-0.160654	1.00217	0.741015	0.795285	-1.4121	-0.85696	-0.345769	0.313177
ENSG00000147488	O60284	9705	ST18	-0.354671	-0.818213	-2.30457	0.481573	-1.39971	0.939678	0.188739	-0.813443	1.03907	0.68112	1.36326	1.5696	0.309453	-0.75523	0.62816	0.197403	-1.21655	-0.463444	0.178553	1.48519	0.826962	-0.701596	-1.02318	-0.0381545	0.666596	0.504337	0.281824	1.05952	-0.359591	0.663006	0.467478	0.478839	0.674245	1.39763	0.989164	1.41304	-0.623762	-0.125885	-0.621346	-0.542494	-1.34691	-1.11509	0.880987	0.731679	-0.887026	-0.551765
ENSG00000133858	O60293	196441	ZFC3H1	3.06271	0.0776128	2.20522	-0.877199	-0.187268	-1.30539	0.726288	0.197283	-0.327608	-0.880336	-0.337478	-0.972295	0.591773	0.231721	-0.834542	-0.22368	0.00378549	0.251008	-0.0413543	0.646373	-0.818193	-0.46641	0.329509	-1.05153	-1.08475	-1.94277	-1.6342	0.330589	0.590722	2.01658	-1.01481	-0.751755	-0.187001	-1.48542	0.495688	-0.603711	-0.0306846	0.246703	0.0376461	1.61174	1.13165	0.528977	0.0586805	-0.403443	0.0493418	0.194612
ENSG00000198836	O60313	4976	OPA1	-1.37078	-0.985074	-0.852711	0.613404	0.776713	0.506312	-0.488171	-0.614627	-0.934736	1.33278	1.32139	0.740229	-0.937417	-1.48638	-0.857542	1.6842	1.09101	0.973004	-0.995852	-0.695272	-0.929937	0.635219	0.750048	0.724187	-0.0475049	-0.974922	-1.17388	1.81552	0.862823	1.49529	-1.60569	-1.32028	-1.74068	-0.297366	-0.887075	-0.181139	0.3186	0.0282141	-0.766645	1.0779	1.49637	0.480341	-0.151193	0.504322	-0.584946	0.96199
ENSG00000169554	O60315	9839	ZEB2	-0.477636	-1.07467	-2.21457	0.499647	-0.511294	-0.404856	-1.0579	-1.15242	-1.63068	1.3418	1.82352	1.03343	0.982408	-0.148669	0.334862	0.901748	0.0372581	0.998142	0.0848596	1.27147	0.0540329	-0.113498	-0.185079	-0.391915	-0.971779	-1.20316	-1.71768	1.01492	-0.507601	0.49653	-1.20533	-0.618945	-0.980397	1.85179	1.61705	1.70976	-0.563446	-0.452586	-0.841302	0.571846	0.521117	-0.0273711	0.989	0.700609	-0.519062	0.667736
ENSG00000054523	O60333	23095	KIF1B	1.75935	1.58479	0.365092	-0.587152	-0.228729	0.379083	0.619634	0.170408	0.754534	-0.992921	-0.871509	-0.763207	0.977127	0.0189589	0.884017	-1.7162	-0.725992	-1.16711	0.77924	0.208914	1.58577	-0.622167	-1.63976	-0.772169	-1.01509	-1.3125	-1.34756	1.27414	1.56111	1.19716	-1.65551	-0.879348	-0.836963	0.806494	0.639618	1.04199	1.41736	-0.544873	1.20254	0.582809	-0.27472	-0.221031	-1.43822	-0.36458	-0.0826215	-0.133543
ENSG00000081913	O60346	23239	PHLPP1	1.49405	0.950679	0.227582	-0.901424	-1.08907	-0.139719	1.69927	1.83907	0.508253	-1.00833	-1.68857	-0.455194	0.627754	1.08252	0.135682	-0.842266	-0.991025	-0.48269	0.98066	0.442102	0.188232	-0.677332	-1.28569	-0.614542	1.00412	1.27207	1.15974	-1.51089	-0.518087	-0.237439	1.29282	1.11625	1.37967	-1.57257	-1.09103	-1.13417	0.718201	1.06555	0.342502	-0.841723	-0.762771	-1.03051	0.491041	0.933155	-0.342157	-0.301597
ENSG00000149485	O60427	3992	FADS1	1.73802	1.79728	2.27257	0.637406	0.441213	0.605356	0.706483	0.685239	0.313221	-0.267949	0.0705451	-0.809279	0.0182656	-0.272461	-0.126529	-0.729437	-0.511819	-0.667662	-0.214879	-0.517314	-0.800309	-1.18537	-1.41177	-1.77081	1.5448	1.15253	1.6691	0.599953	0.181306	0.437331	1.13054	1.14309	1.47306	-0.0229223	-0.56938	0.0986812	-0.0811212	0.255101	-0.374524	-0.503348	-0.503348	-0.753311	-0.906445	-0.285813	-0.986462	-1.91719
ENSG00000105928	O60443	1687	GSDME	0.191809	0.10601	-0.95744	-0.0557725	0.173254	0.0702327	-1.96413	-1.36497	-1.49941	-0.156318	1.47275	0.494907	0.209897	-1.83752	-0.218273	0.79309	0.983309	0.796188	-0.477428	-0.409208	-0.0561917	1.97984	0.656639	1.06874	-0.974488	-1.40743	-1.32583	0.676284	0.986873	1.35264	-1.71186	-1.22023	-1.2624	1.13315	1.41933	1.50777	-0.185318	-0.311848	-0.414369	0.13382	0.621841	0.61123	-0.616315	-0.706175	-0.256957	0.664835
ENSG00000118257	O60462	8828	NRP2	-0.262434	-0.849108	-1.35128	2.8839	2.24579	1.15465	0.672676	-0.0405802	0.574298	0.0306689	-1.2766	-0.342911	-0.24555	-0.206195	0.0310425	0.618577	-1.16608	0.133436	-0.354476	-0.583484	-0.614226	-0.216222	-0.583611	-0.252275	0.296662	-0.181699	0.0771648	2.1558	1.97058	1.55049	0.428874	0.507447	0.564717	-0.753834	-1.29636	-0.908215	0.787585	0.594914	0.130595	-1.15329	-0.59271	-0.879093	-0.900461	-1.21437	0.91587	-0.499531
ENSG00000136040	O60486	10154	PLXNC1	-0.145251	0.962276	-0.0531003	-0.714376	0.385992	0.0954117	-0.902397	-0.35813	-0.405388	-1.34446	-1.34083	-0.528236	1.11188	-0.418404	0.25654	-1.19606	-1.15283	0.0192385	2.35473	1.93002	1.66654	-0.311749	-0.00585102	0.0944288	-0.193505	-0.381687	-0.336164	0.865859	1.28722	0.730863	-0.0401742	-0.0044165	-0.435991	-1.78538	-2.10149	-1.71333	0.761584	0.673285	0.832316	-0.9326	-0.383851	-0.382768	1.58518	1.59843	0.945782	-0.29846
ENSG00000068366	O60488	2182	ACSL4	-0.506822	-0.697291	-1.02169	1.51289	1.20714	1.20589	-0.914675	-0.987757	-1.18245	1.29752	1.2675	0.68336	-0.767429	-0.980756	-0.712105	1.30435	0.793579	0.775958	-1.10936	-1.01221	-1.19589	0.406067	0.354176	0.280012	-0.344748	-0.642502	-0.729089	1.66967	1.2128	1.26449	-1.01047	-0.959756	-0.795687	1.18631	1.20477	1.20477	-0.994791	-1.22623	-1.25246	0.534466	0.639305	0.664159	-1.12572	-0.891653	-1.09302	0.505085
ENSG00000198408	O60502	10724	OGA	-0.532664	-0.545245	-1.34207	-0.266481	0.975934	1.63045	-1.06076	-0.424891	-0.434334	-1.19851	-1.71508	-1.0705	0.877325	0.131577	0.458729	-0.935162	-0.275944	-0.555538	1.11701	1.61014	1.30483	1.16938	0.253202	0.828603	-1.45927	-1.66537	-2.04989	-0.140952	0.432742	0.385157	-1.17655	-0.818916	-1.39277	-0.335804	-0.179781	-0.593306	0.415611	0.299171	0.923139	0.112843	0.747924	0.226064	0.823532	1.27778	0.988762	1.00629
ENSG00000120896	O60504	10174	SORBS3	1.38067	1.38534	1.23866	-2.13523	-1.95039	-1.48023	0.353692	1.06109	0.103325	-1.40745	-0.0846011	-0.501799	1.09465	1.03183	-0.0306671	-0.428432	-0.315292	-0.209309	0.475952	0.0567994	-0.158628	0.729765	0.198724	-0.408462	0.00916027	0.402108	0.669402	-2.82911	-2.76239	-1.6485	0.547312	0.505216	0.44687	-0.459936	-0.119051	-0.428774	0.353571	0.65299	0.468559	0.385218	0.534321	0.33098	0.704451	0.603389	0.481181	0.496205
ENSG00000135316	O60506	10492	SYNCRIP	-1.60016	-1.70813	-0.349611	-0.286497	0.533402	0.93927	-0.385372	-1.28923	-0.0584015	1.62632	0.574215	0.298035	-1.71442	-0.202559	-0.648552	1.07217	1.53852	1.13416	-0.798982	-0.513101	-0.468264	0.674289	0.532962	1.09992	0.955699	-0.258315	0.409407	-1.27179	-2.03065	-1.10166	-0.109281	-0.0511675	0.491944	-1.50606	-1.79447	-0.90819	1.16737	-0.251509	0.565556	1.26478	-0.132052	0.439174	1.53327	1.07296	0.782359	0.470701
ENSG00000168438	O60508	51362	CDC40	2.29175	-0.466671	1.82672	-0.913582	-0.920033	-1.68579	0.941149	0.119804	0.562219	-0.769357	-0.370443	-1.99094	0.508207	0.0993718	-0.0435382	0.869171	0.771024	0.607759	0.171995	0.587107	-0.451978	-0.387127	-0.430637	-0.926178	-0.662174	-0.498964	-0.493307	-1.12056	-0.779079	-0.453842	-1.30587	-1.17969	-0.56721	-1.37949	-0.0394109	-0.871074	1.01516	0.368802	1.17208	2.37037	0.777532	1.45426	0.217608	-0.647701	0.519165	1.05586
ENSG00000137040	O60518	26953	RANBP6	-1.47295	-1.33651	-1.15929	0.499595	1.08822	0.645928	-0.492959	-1.1473	-1.05535	1.05782	1.04101	0.885711	-0.940486	-0.697164	-0.767809	1.32933	1.1923	1.14243	-0.592946	-0.584653	-1.04333	0.87447	0.689855	0.844091	-0.256402	-1.84274	-1.73289	0.59467	1.32138	0.729956	-1.4078	-0.103424	0.00961373	0.00961373	-0.0701608	-0.416953	-0.272017	-1.35334	-0.139628	0.599725	1.34084	0.698859	-0.970402	-0.48684	-0.235162	1.85094
ENSG00000165525	O60524	9147	NEMF	-0.975366	1.25787	-1.83383	1.14903	1.54262	2.12825	0.268883	-0.354381	-0.0562659	0.996476	0.061939	0.522252	-0.197117	-0.100354	0.0379441	0.265279	-0.567096	-0.742088	0.15742	0.451902	0.194897	-1.28615	-1.12944	-1.79267	-0.917394	-2.23677	-2.25878	1.40135	1.24274	0.574156	-1.63113	-0.114211	0.0774587	-0.323985	-0.405239	1.06787	0.995898	-0.131074	0.0382774	0.110151	1.05967	0.592907	0.232014	0.538271	-0.876075	-0.00686418
ENSG00000112699	O60547	2762	GMDS	-1.24054	-0.116918	-0.874715	-0.164417	-0.0958207	-0.634185	-0.662648	-0.7584	-1.27468	0.640782	1.12539	0.141099	-0.701524	-0.484321	-1.11975	0.931039	1.50806	1.12685	-0.0426339	-0.92326	-1.04699	2.00507	1.35479	1.30773	-1.85911	-1.2305	0.135377	0.272618	0.57559	0.163634	0.0781699	-1.27265	-1.81593	0.895778	1.27214	2.1958	-0.812336	0.330339	-0.101303	0.0375617	-0.271299	0.871335	-0.220685	-1.17507	-0.24801	0.133485
ENSG00000152465	O60551	9397	NMT2	-0.410645	-1.92143	-0.811813	-1.92431	-1.14478	-1.67959	1.02632	-0.0763627	-0.5261	-0.76704	-0.00449137	-0.798845	0.823419	1.21711	0.638708	0.717427	0.409454	0.323552	1.32253	0.548337	0.380078	0.765602	1.22687	0.665986	-0.166557	-0.56283	-1.24263	-2.44466	-2.00813	-0.59603	1.38351	0.942322	-0.238025	-0.523024	0.359942	-1.42465	0.179977	0.710858	0.0233147	0.432931	0.331563	0.748504	0.364467	0.696136	0.0269617	0.989053
ENSG00000156970	O60566	701	BUB1B	0.524476	0.92381	2.00663	-0.266233	-1.08972	-1.00582	0.944043	0.930594	0.413536	-0.161314	-1.44605	-0.726598	0.344201	0.628161	1.19699	-0.697678	-1.45534	-1.00617	0.892896	0.949105	0.854398	-0.352524	-1.23906	-1.16234	1.1628	1.1949	1.16865	-1.01143	-1.11947	-0.402822	0.904824	0.877496	0.896096	-1.64022	-1.71693	-1.05663	0.614632	1.13879	0.161393	-0.313216	-1.1098	-0.7667	1.03222	1.23075	0.199141	-0.0851833
ENSG00000082258	O60583	905	CCNT2	0.411632	0.618445	0.548268	1.53943	1.52799	0.48197	1.51089	0.147525	0.0122835	0.826498	0.457508	-1.65869	-0.483987	1.06232	-0.0501223	-1.26152	-0.567371	-0.941273	-0.18062	0.321778	-0.30071	-2.15328	-0.440585	-1.42837	-0.735813	-1.46503	-1.56445	0.585137	1.75311	0.93008	-1.81014	-1.0361	-0.775644	0.611257	0.552975	0.671525	-0.575733	-0.639427	-0.0341351	1.48188	0.721175	0.715472	-0.852092	-0.750259	-0.292814	0.649206
ENSG00000131504	O60610	1729	DIAPH1	0.759196	0.228759	0.23653	-1.09892	-1.85861	-1.59521	-0.346231	-0.108467	-0.885344	-0.845184	-0.403694	-1.79757	1.1929	-0.445751	0.302052	0.24272	0.532756	0.15241	1.48104	1.28298	0.326179	1.92843	0.562475	0.156559	-0.696367	-0.421868	-0.0709569	-0.195758	-1.05903	-0.664411	0.567718	-0.817422	-1.0879	-2.21594	-0.628324	-0.930179	0.492908	0.131136	0.294464	0.381337	1.29539	0.621574	0.688603	1.23477	-1.04466	0.576046
ENSG00000065609	O60641	9892	SNAP91	-0.989427	-1.19761	-1.35744	1.13003	1.23322	0.82088	-0.775761	-0.911582	-0.722498	1.42144	1.48548	1.09535	-0.874322	-0.823975	-0.656137	1.20736	0.797753	0.741524	-0.982477	-0.930541	-0.991102	0.432223	0.342076	0.505519	-0.691391	-1.58081	-1.06321	1.50262	1.36987	1.27071	-0.839706	-0.598775	-1.00302	1.14078	1.31002	1.48402	-0.292748	-0.935279	-0.297407	0.691659	0.303726	0.610946	-1.52275	-0.957582	-0.640478	0.361195
ENSG00000105355	O60664	10226	PLIN3	0.135573	1.57978	0.422054	-1.92122	-1.88037	-1.69789	0.752515	1.32054	0.930188	-1.11366	-0.801985	-0.446462	0.657724	0.929245	0.672623	-0.876919	0.159623	-0.353071	0.905131	0.506895	0.892474	-0.558411	0.0728128	-0.287187	0.882189	1.22301	1.00412	-1.1538	-1.06263	-0.940414	1.02792	1.13485	0.959434	-0.405545	-0.652503	-0.936725	0.928141	1.63229	0.659232	-0.838104	-0.569391	-1.13314	0.676695	1.02106	-0.0921653	-0.88764
ENSG00000185238	O60678	10196	PRMT3	0.966925	1.74813	1.53323	-1.24404	-1.27404	-0.56302	0.651729	1.59017	-0.0352361	-1.13658	-0.421674	-0.629921	0.514083	-0.0265258	0.497425	-0.989434	-0.479962	-0.276705	1.39834	0.534399	0.833084	-1.44925	-0.877129	-0.863994	-0.0684237	-0.549554	2.78142	-1.32438	-0.875951	-0.972677	-1.38616	0.287824	-0.69022	-0.612129	-0.84911	-0.845284	1.9771	-0.429685	0.967062	0.576947	0.0970074	0.130286	0.990543	0.632726	-0.209965	-0.0889563
ENSG00000109814	O60701	7358	UGDH	1.32067	1.60625	1.32292	-0.518912	-0.893894	-0.490876	1.2452	1.36701	1.00206	-1.17331	-1.29914	-1.17767	0.49065	0.334833	0.515492	-1.46231	-1.01491	-0.892604	0.5377	0.524618	0.582481	-0.747976	-0.570891	-0.607401	0.905768	0.617775	0.797722	-0.456154	-0.234731	-1.48551	-0.0590777	0.235549	0.721418	-2.2606	-1.46993	-1.55362	1.65193	0.0323999	1.53532	0.37063	-0.776396	-0.216008	0.596594	0.663272	1.22958	-0.231204
ENSG00000198561	O60716	1500	CTNND1	1.37205	1.23067	1.74639	-1.2985	-1.48893	-1.19205	1.04717	1.44364	0.218024	-1.20385	-0.902979	-1.40931	1.12508	0.399431	0.604717	-0.949072	-0.53623	-0.316967	0.067891	0.247397	0.389329	0.273559	-0.463783	-0.403676	-0.941742	-1.2816	-0.878524	-1.25125	0.0810871	-0.35294	-0.239272	-0.395561	0.149432	-0.870559	-1.53714	-1.49109	0.884309	0.813457	0.458006	-0.0644492	1.3234	0.191225	0.354703	0.798937	-0.185481	1.46145
ENSG00000116237	O60725	23463	ICMT	1.84846	1.91567	1.64248	-1.01725	-0.124482	-0.376955	0.330049	1.36325	0.60755	0.0246351	-0.436539	-0.905525	0.708156	-0.30813	0.366028	-0.808717	-0.654138	-0.63263	0.0511559	0.339735	0.356991	-1.53095	-1.19477	-1.56407	1.14692	0.474545	1.68608	-0.237042	-0.139424	-0.0366599	1.00432	2.63155	0.685639	0.231889	-0.603449	0.0732481	-0.533908	-0.175712	-1.18523	0.505811	-0.648011	-0.0601079	-0.159537	0.265392	-2.08996	-0.917983
ENSG00000114784	O60739	10289	EIF1B	0.483882	0.865696	0.830625	-1.5846	-0.820594	-1.43734	-0.620848	0.257614	-1.65555	-0.7974	-0.0915672	-0.554517	0.15107	-0.547846	-0.334875	0.457906	1.26952	0.502984	0.03992	-0.184256	-0.668866	2.66182	1.25936	0.51787	-0.935529	-0.577869	-1.41203	-0.77314	0.323892	-0.0902235	-0.666926	-0.502027	-1.08188	-0.790319	-0.712362	-1.0381	0.24981	-0.414616	0.547961	0.675642	0.99815	0.503524	-0.395799	-0.45771	0.754421	2.05651
ENSG00000205302	O60749	6643	SNX2	0.234944	0.87849	0.509401	-0.694654	-1.76867	-0.635556	1.64093	1.27863	1.2243	-0.588674	-1.20281	-0.445997	0.830339	1.24031	0.971083	-1.22998	-1.09696	-0.722759	0.412938	0.43542	0.959281	-1.40576	-0.605371	-0.218867	0.45023	0.542595	0.335215	-0.998598	-0.230782	-0.439339	0.487617	0.934315	0.655311	-2.21633	-1.61108	-0.480477	2.32123	0.718533	1.09328	-0.868365	-0.227859	-0.673413	0.109495	0.477972	1.33456	-0.546626
ENSG00000000419	O60762	8813	DPM1	1.84198	1.91204	1.83131	-0.72441	-0.963521	-1.56293	0.108569	1.53106	-0.735501	-0.516729	-0.0696449	-1.49728	0.677038	-0.251257	-0.478866	-0.188113	0.181882	-0.344742	0.0249154	-0.0979817	-0.558312	1.06618	-0.283586	-0.902112	1.45692	1.19429	-0.119184	-1.27688	-1.4244	-1.32039	0.501562	1.21031	0.804687	-1.93042	-1.52251	-1.34646	0.45025	0.99685	0.895371	-0.241098	-0.0259249	-0.234089	0.26792	0.0674214	0.802057	0.836808
ENSG00000123836	O60825	5208	PFKFB2	-0.883555	0.36603	-1.08729	1.37545	1.23858	0.516345	-0.576003	-0.879312	-1.74401	1.25937	0.999294	0.462087	-0.831769	-0.119325	-1.44698	1.38241	0.855489	0.683282	-0.848447	-0.298182	-1.60838	0.723432	0.637424	-0.175953	-1.08891	-1.19537	-0.266863	1.16827	0.634972	0.687289	-1.45977	-1.13013	-1.42927	0.677259	1.36848	0.79949	0.0302155	-0.896984	0.181883	1.77241	0.646894	0.785173	-1.18759	-1.25457	-0.388031	0.551452
ENSG00000126768	O60830	10245	TIMM17B	-0.970833	-0.959983	0.577163	0.634584	0.548997	-1.49554	0.520948	-1.20798	-0.778666	1.31615	0.456636	0.88501	-1.16837	-0.562364	0.294875	2.17083	0.286598	1.78466	-0.0967993	-1.09784	-0.857922	-0.887976	0.558177	0.0496486	1.01609	0.895277	0.16137	2.1962	0.627906	0.958627	-0.505093	0.364315	-0.373999	1.54665	0.662431	0.505158	-1.60073	-0.685503	-1.63071	-0.277847	-0.470618	0.0994688	-0.5211	-1.72075	-1.31743	0.514244
ENSG00000243279	O60831	11230	PRAF2	-0.147791	0.709072	1.05644	-0.312081	0.634752	-1.24923	-1.62257	0.200148	-1.44244	-0.880607	0.589355	-0.788993	-0.530179	-0.595346	-0.482018	1.75914	1.29817	1.32818	-0.452049	-0.808636	-0.845887	1.78428	0.79404	0.00423497	-2.00461	-1.56101	-0.27815	0.816026	1.97025	1.33489	0.199318	-0.848951	-0.789727	0.378502	0.0603574	0.209386	-1.02192	-0.51988	-0.0676488	0.18822	1.84972	0.966225	-0.902603	-0.97589	-0.459787	0.286242
ENSG00000130826	O60832	1736	DKC1	1.83785	1.24015	2.226	0.359346	0.0381567	-1.64796	1.16256	1.09826	-0.214337	-0.326203	-0.626673	-1.85071	0.66144	0.357562	-0.559045	-0.352619	-0.162516	-0.326338	-0.990887	0.0565513	-0.978989	-0.268814	0.0432436	-0.776035	1.47612	0.873117	1.53389	-0.927091	-1.05926	-0.95009	1.41637	0.217804	0.994774	-1.64948	-1.9497	-1.20622	0.0421489	-0.509856	-0.440574	-0.181966	-0.913553	0.274954	0.783454	1.0943	0.399917	0.158302
ENSG00000007237	O60861	8522	GAS7	-0.717341	-0.119886	-0.390284	1.15802	0.488423	0.544576	-0.304316	-0.627781	-0.511355	1.59869	1.82688	1.52366	-1.25477	-0.669828	-0.979595	1.96389	0.456889	0.664992	-0.731313	-1.10456	-0.934665	-0.970294	-0.504984	-0.405047	-0.345879	-0.131036	0.00397263	1.42302	0.90657	0.780602	-0.578361	-0.797585	-0.552717	1.39561	1.30204	1.39598	-1.15816	-0.650988	-0.980187	1.08303	0.571463	1.13529	-1.00548	-1.44074	-1.61078	0.00837561
ENSG00000147202	O60879	1730	DIAPH2	0.882507	1.0027	1.24778	-0.648491	-1.53225	-1.58372	0.78034	1.80799	0.612749	-0.472635	-0.795031	-1.36057	0.853634	1.07456	0.915315	-0.380582	-1.00801	-1.03238	0.517914	0.334966	0.618895	-0.122756	-0.51808	-1.19485	0.795281	1.48272	1.39644	-1.22979	-0.638661	-0.946518	0.579692	0.731114	0.480812	-1.09778	-0.734349	-0.892951	1.11011	1.27964	1.10266	-0.769134	-0.33383	-0.832044	0.545648	0.856786	0.76589	-1.03857
ENSG00000141867	O60885	23476	BRD4	1.43598	-1.49143	0.328482	-0.430645	-0.433002	-1.28551	0.90945	0.51795	0.613651	-0.893836	-1.47321	-1.95822	1.27335	1.04965	0.974115	-1.45033	-0.420299	-0.0106761	1.15804	0.70127	0.678247	0.24202	-0.0197406	-0.015293	-0.0375025	0.655203	0.239639	-0.470165	0.241372	-0.0147788	-1.26141	-0.760187	-0.308125	-1.70559	-1.57914	-1.82619	1.31403	0.515987	1.76376	0.968602	-1.02796	-0.203917	0.0186826	1.14878	1.51046	-0.0905823
ENSG00000101849	O60907	6907	TBL1X	1.21741	0.458572	1.54463	-0.486294	-1.76009	-0.590857	1.37033	0.210414	0.801211	-0.134606	-1.86922	-0.959664	1.27205	0.112205	1.3618	-0.132741	-1.24694	-0.202142	0.43316	0.0297601	0.906545	-0.83296	-1.14472	-0.357833	0.996412	1.04771	1.21677	-0.731849	-0.56492	-0.697183	0.881886	0.552427	0.658232	-1.68121	-1.34699	-1.5672	1.10286	0.63384	1.19184	0.591087	-0.319166	0.0181743	0.26135	0.0223395	0.945232	-1.11785
ENSG00000136273	O60921	3364	HUS1	0.905836	1.58423	1.93992	-0.613061	-0.544714	-1.47473	1.45906	1.71111	0.315737	-0.750269	0.0829077	-0.9482	0.193378	0.885399	0.0035779	-0.167651	0.14917	-0.697502	0.047696	-0.258253	-0.612861	-0.36728	-0.945687	-1.89782	-0.237947	-2.26602	-1.2378	0.530378	0.0809873	0.210116	0.325216	-0.239926	0.411823	1.87486	1.22109	1.15158	0.272453	0.386013	1.00929	-0.572305	-0.0197262	-1.36765	0.614858	0.0420843	-1.70393	-0.582958
ENSG00000113068	O60925	5201	PFDN1	-1.30165	-1.40385	-1.2195	0.411873	0.335857	0.992753	0.262674	-0.835643	-0.522924	1.41396	0.853182	1.20694	-0.855825	-0.8743	-0.948253	2.14736	0.677319	0.891731	-0.354542	-0.838909	-1.24894	0.160513	0.272633	0.777533	-0.705906	-1.99065	-0.794611	-0.697977	0.166545	-0.25389	0.303481	0.362549	-0.256923	-0.423381	0.171019	1.21519	-0.688741	-0.757078	-1.08506	-0.707891	-0.80471	0.0494293	1.74226	0.580992	-0.117425	2.47215
ENSG00000104320	O60934	4683	NBN	1.37632	1.84515	1.3638	-0.929977	-0.86227	-1.13105	0.755729	1.24315	-0.0479535	-1.30655	-0.715466	-1.29857	1.17321	0.335585	1.11396	-0.86598	-0.459506	-0.528143	0.38353	0.17545	0.850526	-0.705684	-0.915455	-0.849809	0.0769278	-0.278547	0.626178	0.4001	-0.40123	-1.22675	0.157163	-0.908582	0.277966	-1.76827	-0.876376	-1.79777	1.28495	1.22279	1.05438	-0.783094	-1.49735	-0.188272	1.49122	1.40553	0.922427	-0.0412107
ENSG00000140939	O60936	8996	NOL3	0.0314497	-1.06511	0.515547	-1.69254	0.161648	-0.314249	-0.711775	-0.759295	0.0898639	-1.29142	-0.974677	-0.272238	0.129253	2.13694	0.81052	-1.47729	-0.532087	0.00830576	1.36295	1.56613	1.26725	-0.358407	0.947466	0.421768	-0.910592	0.90154	-0.240148	-0.0667403	1.10674	0.704609	-0.865343	-0.566591	-1.5918	-1.5956	-0.625051	-2.16015	0.31319	0.764563	1.34512	0.936409	0.731079	0.544983	-1.17322	-0.102669	0.464314	-0.0113174
ENSG00000111880	O60942	8732	RNGTT	-1.47264	-1.20433	-1.15368	1.46084	2.10117	0.375618	-0.435873	-1.70465	-1.05932	0.825918	-0.411557	-0.321665	-0.120928	-0.606824	-0.553565	1.16455	1.12272	0.163465	1.26064	0.155242	-0.350215	0.647125	-0.529448	0.64742	-0.297912	-1.80596	-1.7622	1.11144	1.46522	0.707782	-1.92677	0.0433614	-0.711569	0.0494075	0.136466	1.03107	-0.789927	-1.42211	-0.100324	0.816399	0.735103	0.178091	-0.531137	0.792114	-0.361883	0.636221
ENSG00000116852	O75037	23046	KIF21B	-1.64313	-1.4459	-1.75703	0.863133	1.26451	1.24089	-0.5658	-1.2553	-0.709941	1.26569	0.759512	0.796477	-0.881992	-0.325434	-0.535854	0.767931	0.583524	0.799562	-0.639022	-0.309142	-0.764545	0.578207	0.83202	1.08164	-1.57957	-2.05662	-2.18062	1.04845	0.826082	0.809372	-0.743238	-0.225478	-0.690045	1.03858	0.927441	1.14694	0.109661	-0.858442	0.0799469	0.806111	0.537022	0.494985	-1.07981	-0.520754	0.126762	0.564691
ENSG00000149527	O75038	9651	PLCH2	-1.25891	-1.48189	-0.764282	0.922838	1.0708	1.65367	-1.68105	-1.589	0.262251	0.286217	-0.941557	0.0563416	-0.425601	0.250588	-0.109586	0.900516	-1.04596	0.187367	-0.402678	0.872325	0.174904	1.41902	0.115889	1.5278	-0.435569	0.0581971	-0.0322983	0.716608	0.874869	1.17892	-0.3547	-0.138537	-0.0867532	-1.66607	-1.31228	-1.08273	-0.830319	-0.896003	-1.02788	0.407919	0.619043	0.746203	0.399839	-1.21769	-0.49337	2.56914
ENSG00000266028	O75044	23380	SRGAP2	-1.64728	-1.07999	-1.29513	-0.446396	0.158204	0.10369	-0.808318	-1.33087	-0.584428	1.41687	1.23236	0.454111	-0.752704	-0.555381	-0.392868	2.69566	1.05977	1.03344	0.0981559	0.339288	-0.00158774	-0.108731	0.22211	0.190027	-1.37384	-1.13492	-0.484787	0.0829584	-0.0393533	-0.0433701	-1.35149	-0.874573	-0.74318	1.2343	1.63283	1.14161	-0.288652	-0.178153	-1.50353	1.78235	0.712868	1.17933	0.57742	1.07602	-1.39141	-0.131771
ENSG00000076356	O75051	5362	PLXNA2	-0.516545	-1.53719	-0.89995	-0.438429	-0.873053	-0.705133	-0.314895	-0.502789	-0.740579	-0.0106533	0.458795	0.00803853	-0.499552	-0.505778	-0.175622	0.613035	1.68283	1.44542	-0.491267	-0.806344	-0.613392	2.05153	1.73178	1.63974	-0.774331	-1.00076	-1.85876	-0.585954	-0.872373	-0.750052	-0.408113	-0.0483695	-0.171405	-0.312842	-0.227156	-0.276299	-0.00481779	-0.636436	0.00534473	1.07207	1.41809	0.519822	-0.769374	-0.240842	0.121412	1.70117
ENSG00000198929	O75052	9722	NOS1AP	1.06728	1.30368	1.01771	-1.20534	-1.05358	-0.966925	1.2964	1.23138	0.64956	-1.28819	-1.22993	-0.955596	0.905159	1.02725	0.989469	-0.997869	-0.829064	-0.67653	0.706635	0.255508	0.893174	-0.870482	-0.673538	-0.596168	-1.04041	-0.659967	-0.334999	-0.756444	-0.219792	-0.774723	-0.740906	-0.256121	-0.532571	-1.02257	-1.08265	-0.947013	0.728706	0.2988	0.660865	1.39918	1.12991	1.05614	-1.82377	-0.114518	0.388441	1.40642
ENSG00000143061	O75054	3321	IGSF3	-0.910377	-0.767136	-1.19221	-0.245466	-0.467653	-0.348389	-0.481068	-0.596723	-0.992471	0.385707	1.3826	0.339166	-0.653956	-0.577948	-0.696929	0.577322	1.3109	1.17797	-0.535686	-0.912769	-0.966873	2.19253	1.37646	1.60299	-1.54482	-1.6514	-1.51999	0.203912	-0.429392	-0.153039	-0.151411	-0.154058	-1.14741	0.682069	0.940887	0.36088	-0.244034	-0.498889	-0.186566	0.871584	1.37074	0.687534	-1.28034	-0.516466	-0.180346	1.54361
ENSG00000116675	O75061	9829	DNAJC6	-0.565814	-1.29572	-1.00224	1.3824	1.40998	1.02202	-0.82362	-1.24096	-1.13184	0.845198	0.818298	0.680884	-0.813173	-0.167074	-0.936926	1.18528	0.634976	0.946218	-1.06557	-0.773146	-1.36451	1.06253	0.591379	0.601435	-0.467099	-0.723494	-0.848339	1.41454	1.35722	1.25727	-1.27112	-0.665117	-0.899102	1.03627	0.875445	1.14475	-0.901414	-1.04597	-0.973151	0.929928	0.582294	0.944733	-1.42055	-1.03807	-1.02244	0.560388
ENSG00000116199	O75063	9917	FAM20B	-0.68444	-0.661183	0.602237	-0.0838957	0.171815	0.815061	-0.141793	-1.18247	-0.45871	2.01281	0.783103	0.714667	-1.08902	-1.24219	0.0712002	1.88888	0.0109527	1.76846	-1.71583	-1.03992	-0.576154	0.445052	-0.485502	0.0768658	-1.06424	-1.50264	-0.899753	0.842118	0.673905	0.465189	-1.39524	-0.88883	-1.6258	1.73795	1.74235	1.58792	-0.315748	-0.234349	-0.552105	0.842118	0.936209	0.460233	-0.456219	-0.31813	-0.736152	0.407347
ENSG00000071127	O75083	9948	WDR1	-0.935584	0.3941	-1.13451	-1.77376	-1.23089	-1.01183	-0.0474983	0.0255266	0.254143	-1.1976	-0.93418	-1.05272	1.14112	0.326786	0.702988	-0.256749	-0.0773964	-0.512119	1.35642	1.11817	1.57666	1.05772	0.843297	1.36792	-1.10136	-0.579137	-0.701947	-1.03963	-1.32838	-0.754938	-0.157186	0.506911	-0.00293831	-1.24859	-1.52651	-1.55518	1.27917	1.75776	0.718573	0.498778	0.254959	0.223561	1.62818	1.23623	0.736961	0.630772
ENSG00000054793	O75110	10079	ATP9A	-0.504713	-0.850579	-1.26076	0.988244	1.46567	1.25673	-1.0432	-1.16282	-1.61997	0.437069	0.505785	-0.12779	-0.566026	-0.784328	-0.935443	1.00858	0.811215	0.743799	-0.258685	-0.648438	-0.974254	1.79901	0.800237	0.920663	-1.28123	-1.61849	-1.23253	1.2131	1.30172	1.12162	-1.2434	-0.811239	-1.21401	0.865634	0.762591	0.850901	-0.608316	-1.03102	-0.590298	0.916241	0.626438	0.849257	-0.757857	-0.463719	-0.335863	0.750831
ENSG00000163539	O75122	23122	CLASP2	-1.58004	-1.52121	-1.65243	0.853555	1.14123	1.12567	-1.05023	-1.06253	-1.28408	0.724253	1.05136	0.233505	-0.707213	-0.545934	-0.760138	0.767057	0.439638	0.453759	0.119504	-0.121135	-0.106574	1.3912	0.857632	1.23316	-1.31858	-1.65472	-1.64997	0.907348	1.14539	0.863315	-1.46625	-0.884804	-1.59013	0.736266	0.821642	0.583752	0.0500394	-0.673564	-0.0519421	0.971159	0.889553	0.683498	-0.742603	-0.193018	-0.158632	0.724326
ENSG00000085719	O75131	8895	CPNE3	0.0349111	-0.304788	0.0138165	-1.31398	-2.47252	-1.06082	2.17024	1.97725	1.62864	0.299199	-0.407228	-0.447793	0.462614	0.743539	0.636197	-0.880469	-0.12927	-0.271781	-0.00264165	-0.0295019	0.0496536	-0.302333	-0.156291	-0.236649	0.484055	0.303135	-0.19113	-1.39524	-1.73157	-2.00143	1.40725	2.24048	1.11225	-0.411981	0.294105	0.429511	1.21483	0.879386	-0.101677	-0.464716	0.0887914	-1.05989	-0.00939945	0.364415	-0.791041	-0.574169
ENSG00000177380	O75145	8541	PPFIA3	-1.38085	-0.828347	-0.923783	1.2911	1.38745	1.08979	-0.81288	-0.947283	-0.748553	1.13401	1.20976	0.631899	-1.17112	-0.691931	-0.690123	1.12223	0.941008	0.854176	-0.864026	-1.23107	-1.03478	0.385655	0.575542	0.702128	-0.582926	-0.656698	-0.875151	1.16881	1.43543	1.34649	-0.893348	-0.968046	-0.578318	0.905834	1.03843	0.696915	-0.912348	-0.954746	-0.872738	0.749286	1.12712	0.739766	-1.79626	-0.979524	-1.15693	0.679534
ENSG00000130787	O75146	9026	HIP1R	-1.66913	-0.936356	-1.38593	-0.205967	0.297366	0.240078	-0.6415	-0.492494	-1.38569	0.506649	0.952667	-0.116604	-1.06267	-0.499275	-0.827902	0.664858	1.29704	1.3082	0.0255919	-0.180458	-0.461837	1.91691	1.07651	1.57995	-1.75275	-1.62731	-1.44743	0.32093	1.24918	0.924326	-0.734362	-0.619541	-0.934987	-0.332474	-0.268946	-0.786725	-0.382943	-0.723649	0.0247901	0.497987	1.09109	0.943279	-0.609348	0.441388	0.549058	0.996144
ENSG00000124006	O75147	23363	OBSL1	1.79793	1.85738	1.66237	-0.612121	-0.463946	-0.523838	1.07784	0.331914	0.616688	-1.32719	-1.08778	-1.34696	0.737427	0.692715	0.512343	-1.10777	-0.805575	-1.06063	0.0874612	0.455776	0.426551	-0.904262	-0.147658	-0.868652	1.49104	1.33372	1.54438	-0.164267	0.273727	0.137419	0.891335	1.08549	1.56409	-1.50905	-1.50491	-1.55126	-0.0415297	0.900561	0.416937	-1.20532	-0.754313	-0.773902	-0.322831	0.107122	-0.0857615	-0.464902
ENSG00000197724	O75151	5253	PHF2	-0.274568	-2.40461	-1.68081	0.264869	1.57112	-0.125901	-1.65653	-0.294363	0.159226	-1.11267	-0.103398	0.647789	0.105431	0.156607	-0.0505268	-0.698543	-0.339393	0.498114	1.23041	1.52956	0.0657218	0.333788	1.03241	1.14627	-2.31383	-2.36155	-1.72568	-0.0379473	1.26394	0.81441	-0.618604	0.25687	-1.18534	0.280502	0.376583	-0.475495	0.121852	0.234346	-0.0367137	0.498894	0.353268	0.674044	0.0491065	0.649445	0.28404	0.504612
ENSG00000144712	O75155	23066	CAND2	0.640259	2.12212	2.07503	0.1377	-0.00112368	-0.774503	0.640439	1.86554	-0.0452233	-0.150912	0.658272	-0.472708	-0.010525	0.271319	0.110076	-0.568938	-0.431003	-0.678537	0.0509953	-0.363594	-0.48858	-1.66125	-1.21371	-1.71115	0.359827	-0.151893	1.12103	0.850625	0.618945	0.658511	-0.318865	-0.671293	0.649416	1.8879	0.673625	0.597475	-0.888996	-1.04884	-1.58711	-0.223133	-0.100209	1.38425	-0.709607	-1.45068	-2.051	-0.831232
ENSG00000138246	O75165	23317	DNAJC13	0.637966	0.458076	0.448717	-1.65545	-1.64575	-1.06142	-0.624362	0.696694	-0.947643	-0.515613	0.157838	-1.52516	0.548277	-0.108687	-0.419711	-0.111334	0.311827	0.0941441	1.18786	0.356792	0.160079	2.96917	0.46176	0.125933	-1.50164	-2.02089	-1.41837	0.614811	0.00581393	-0.442164	-1.90934	-0.390902	-0.870514	1.07254	0.0438363	0.715815	0.783435	-0.586344	0.35308	1.53037	0.73985	0.642578	-0.583725	-0.171668	0.656662	0.666015
ENSG00000184402	O75177	26039	SS18L1	-1.00579	-1.57612	-1.66433	1.04367	1.65474	1.56818	-0.910608	-1.35853	-0.456723	0.814395	0.665225	0.497198	-0.920322	-0.773163	-0.745155	0.828488	0.762944	0.7578	-0.45567	-0.204365	-0.612021	1.11532	0.374635	0.600205	-1.10843	-2.17915	-1.41663	1.21566	1.27842	1.07619	-1.10573	-0.89975	-1.19819	0.0868948	0.55465	0.335572	-0.0574304	-0.65392	-0.497318	0.708628	1.28826	0.85414	-0.527506	-0.467391	-0.105723	1.15773
ENSG00000132466	O75179	26057	ANKRD17	-1.36284	1.18651	0.234698	0.645891	1.16187	-0.252794	-1.61292	-0.631401	-1.95624	0.507702	1.35541	-0.69412	-0.712869	-0.775454	0.215701	1.39185	1.26834	1.44322	0.034016	-0.975938	-0.339699	0.570956	-0.44805	-0.253833	-1.27806	-1.48474	-0.966669	1.19897	1.27181	-0.0449802	-0.715563	-1.03584	-0.579232	-0.492879	-0.353519	-0.146225	-0.179103	-0.438049	-0.368579	1.28355	0.731384	-0.796862	-0.173002	-0.431704	0.274831	2.19621
ENSG00000127511	O75182	23309	SIN3B	-1.85449	-1.05047	-1.23371	0.255281	0.498403	1.9155	-0.668457	-0.443449	-0.0745301	0.872755	0.734502	-0.115215	-1.40313	-0.415462	-0.333017	0.828594	1.64208	0.923834	-0.887143	-0.690378	-0.79817	0.0214442	1.06388	1.21135	-1.91792	-1.96992	-1.11407	-0.11841	0.902534	1.51516	-1.36249	-1.15448	-1.16053	0.407081	0.452324	-0.215668	0.22739	-0.314492	0.841912	0.900936	0.53907	0.425594	-0.52005	0.197947	0.500604	0.435711
ENSG00000105993	O75190	10049	DNAJB6	-1.27724	-2.38395	-1.41448	1.10103	1.45657	0.836627	-0.624999	-2.03122	-0.394771	0.890771	0.262605	0.534685	-0.47375	-0.241974	-0.430154	0.7574	-0.15799	0.588177	0.0828866	0.384216	-0.0635926	0.861677	0.928871	0.808607	-1.39665	-0.95667	-1.61802	1.485	1.66778	0.993713	-1.21838	-0.634064	-0.906572	1.23713	1.12198	0.589048	-1.12498	-0.661411	-0.0799112	1.05983	0.51167	0.58669	-0.937593	-0.373616	-0.700666	0.737163
ENSG00000006625	O75223	79017	GGCT	1.26659	0.957711	0.469857	-1.13509	-0.385308	-0.443734	1.61599	1.53389	1.73835	-0.940411	-1.13393	-1.09969	0.347927	1.53543	0.334332	-0.681557	-0.66022	-1.25741	0.0975055	0.0459081	0.23144	-0.759249	-0.577936	-1.1004	1.67404	0.90101	1.36291	-0.546235	-0.583314	-0.567792	1.52112	1.49704	1.27004	-0.461476	0.0110238	-0.425322	-0.246313	1.33192	-0.816966	-0.738456	-0.786147	-0.637948	0.494817	0.346412	-1.50013	-0.978179
ENSG00000115286	O75251	374291	NDUFS7	-1.66363	-0.397637	-1.07908	0.911386	0.07404	1.11588	0.0254304	0.392323	0.168186	1.60908	1.59171	1.28807	-1.23655	-1.654	-0.50345	1.2299	0.787052	0.368528	-1.03661	-0.990736	-0.382159	-0.866195	-0.0930146	0.341464	-0.816833	-0.53352	-1.25968	0.943081	1.3296	1.44859	0.863578	0.596333	-0.723139	1.75696	0.537619	1.39798	-1.89279	-1.31721	-0.677504	-0.616737	0.734358	0.14523	-0.0588482	-0.544465	-1.30386	-0.0543377
ENSG00000158864	O75306	4720	NDUFS2	-1.03025	-0.803815	0.406726	-0.0530297	0.403056	0.602458	-0.368732	0.164659	-0.805575	1.74725	1.82774	0.881432	-1.19997	-1.4438	-0.90483	1.43004	0.574607	1.12236	-1.21075	-0.834428	-1.23992	0.831745	0.299485	-0.396461	-1.67317	-1.74772	-2.04117	0.887638	0.383151	0.464844	-0.780486	-1.4693	-1.38785	0.0617818	-0.00239517	0.717684	0.210964	-6.32262e-05	-0.0482843	1.39731	0.296184	0.61225	0.0155624	0.419949	0.391694	0.720797
ENSG00000146729	O75323	2631	NIPSNAP2	-2.39563	-1.40611	-1.38096	-0.634387	-0.618212	-0.47792	2.02699	0.884774	1.02584	1.27872	0.424292	0.298679	-0.386661	0.148231	0.37333	0.68891	-0.363976	-0.725379	0.00647931	0.387383	0.799128	-0.991177	1.13604	-0.098378	0.854112	0.806714	0.95301	-0.526265	0.0618121	-0.159146	0.833885	1.20153	0.839576	-1.45223	-1.47279	-1.34712	0.71381	1.2481	0.858354	-1.69242	-0.982914	-1.29375	0.980661	1.01279	0.0289458	-0.0219336
ENSG00000139220	O75334	8499	PPFIA2	-1.01551	-0.579384	-1.17162	0.828299	1.50773	1.21586	-0.585092	-0.988121	-1.35924	0.448418	1.06999	-0.123854	-0.671382	-0.790724	-0.922288	1.20518	1.09482	0.91673	-0.463933	-1.12013	-1.30927	1.03078	0.747616	1.03512	-1.64719	-1.73997	-1.07946	1.47662	1.01943	1.19978	-0.999261	-0.970986	-0.991403	0.588014	0.591778	0.38769	0.0550572	0.068379	-0.781716	0.921139	1.08116	0.767819	-0.916689	-0.953129	-0.574174	1.24662
ENSG00000171530	O75347	6902	TBCA	-1.85989	0.727546	0.00271951	-0.839946	-1.19136	-0.629694	-0.599627	-1.2476	-1.2786	0.566632	0.941567	0.260777	-0.188188	-0.734999	-0.569409	1.04926	1.13335	0.646674	-0.16633	-0.205016	-0.399346	2.07302	0.875162	1.63329	-0.865637	-1.21598	-1.18529	0.374954	-0.573482	0.62281	0.130517	0.617417	-0.608006	1.87539	1.6281	2.49079	-0.579003	0.0288278	-0.228946	-0.445956	0.910455	0.203748	-1.83099	-0.352305	-0.0914457	-0.16537
ENSG00000136888	O75348	9550	ATP6V1G1	0.199139	0.707516	-0.444974	0.0016137	1.27101	1.53169	-0.0588859	0.51149	0.482807	0.631907	1.78901	1.33372	0.0711287	-0.665785	-0.133676	-0.147572	-0.910152	-0.797612	0.204582	-0.217089	-0.0979995	-1.38179	-2.6239	-1.25619	-0.448013	-1.05433	-0.814638	1.15301	2.11019	1.43799	0.949418	0.877224	0.627331	-0.33957	-0.820443	0.959094	0.560374	-0.225414	0.906738	-0.969953	-0.560078	-0.501993	-0.453009	-0.933587	0.933638	-0.784438
ENSG00000119541	O75351	9525	VPS4B	1.14196	1.84767	1.76642	-0.747579	-1.20476	-0.932907	1.09393	0.823249	-0.683598	-0.702543	-0.854672	-1.6674	1.43969	0.181724	0.313085	-1.63277	-0.437667	0.101364	0.456248	0.318974	0.00100272	0.29704	-0.607145	-0.311317	-0.346196	-1.76086	-1.67503	-0.178391	-0.209947	1.03062	-0.73295	-0.734753	-0.315674	-1.38018	-1.59236	-0.729346	0.779054	0.892677	1.19674	0.213954	0.597496	-0.590311	1.17114	0.673633	0.352966	1.64249
ENSG00000171940	O75362	7764	ZNF217	0.927349	1.27501	1.37506	-1.05562	-1.82472	-1.21527	1.9693	0.762075	0.473413	-1.45025	-1.29404	-0.861642	0.43891	0.68729	0.476196	-0.889557	-0.507601	-0.0959399	0.912706	0.23775	0.114339	0.309628	-0.742068	-0.0223187	1.21289	1.07554	1.11875	-1.08658	-1.94048	-2.16365	0.858484	0.967084	1.13713	-0.96533	-1.20678	-1.34527	0.454594	0.605196	0.632275	-0.65569	-0.175394	-0.155868	0.139796	0.364155	0.552171	0.0380029
ENSG00000113648	O75367	9555	MACROH2A1	-0.432279	-1.70638	-1.51304	0.530014	1.24253	0.742957	-0.570413	-0.60188	1.31251	0.361506	-0.587578	0.204485	-0.538492	-0.700042	-1.24341	0.885068	0.975681	0.0971377	-1.10152	-0.658836	-0.756755	0.899246	1.25066	1.90882	1.49513	0.779855	1.65009	-0.335246	-0.612391	-0.514479	1.51144	1.07312	1.45591	-0.497789	-1.00405	-0.382004	-0.164649	0.992844	-0.830373	-1.15449	-0.81063	-1.16446	1.08315	0.701746	-0.661873	-0.557235
ENSG00000131171	O75368	6451	SH3BGRL	1.26084	1.24547	1.26001	-0.687083	-0.990906	-0.967131	0.789727	1.38065	0.628793	-1.03656	-1.33508	-1.4554	0.954119	0.696602	0.540396	-1.12693	-0.995363	-1.22676	0.881669	0.811717	0.587998	-0.0088418	-0.511991	-0.695938	0.70293	0.521968	0.733858	-1.13873	-0.539744	-0.604473	1.35661	1.34195	0.862437	-0.945709	-0.634848	-0.964295	0.672347	1.60332	0.124462	-1.30354	-0.888435	-1.0416	1.42554	1.41895	-0.606988	-0.386098
ENSG00000136068	O75369	2317	FLNB	1.26737	2.49145	1.72367	-0.610695	-1.41439	-0.924525	1.06277	0.739259	0.668532	-0.665244	-0.963789	-0.842718	0.799535	0.684477	0.525386	-1.04251	-0.603045	-0.521974	-0.331748	-0.0253315	0.098856	-0.828032	-0.499956	-0.78735	-0.261793	0.858976	1.69626	0.315252	0.123366	-0.627176	0.296295	0.349088	0.324687	0.0440403	1.21502	0.268604	-0.818952	-0.183338	-0.546654	1.13882	2.06739	0.358423	-2.2345	-1.5624	-1.45287	-0.648915
ENSG00000141027	O75376	9611	NCOR1	0.670863	0.548483	0.790466	-0.599302	-0.614252	-0.773905	0.905941	1.52768	1.31807	-0.891937	-1.22	-1.33285	0.256358	0.89369	0.986092	-0.717196	-1.41105	-1.21366	1.09951	1.14632	1.01457	-1.01576	-0.710977	-0.657157	-0.505064	1.51559	-1.03831	0.98388	0.703675	-0.802593	0.102614	-1.04222	-0.567156	-1.10508	-1.50897	0.216086	0.347576	-1.40964	-0.179279	0.0174607	0.628806	0.0479627	-0.316723	-0.936136	0.00523164	2.24071
ENSG00000117533	O75379	8674	VAMP4	-1.90817	-2.17721	-1.31234	0.833665	0.960077	0.932428	0.148441	-0.758174	-0.13518	1.87981	1.0098	0.998968	-1.01012	-0.354674	-0.0600022	1.10355	0.411573	0.480799	-0.481934	-0.513462	-0.160317	-0.758249	0.436825	0.433897	-0.799346	-1.46443	-2.32675	1.60215	1.24714	0.363336	-0.288931	-1.70567	-1.15167	0.317518	1.07987	0.295555	0.34593	-1.10231	0.417354	0.832167	0.321899	0.483557	-0.24962	-0.492694	0.282332	0.607245
ENSG00000145494	O75380	4726	NDUFS6	-0.579277	-1.00682	-0.714958	1.12679	0.382625	-0.201381	0.416243	0.364267	-1.09606	2.13084	1.82699	0.98168	-0.588411	-1.391	-0.665811	1.69703	0.230339	0.79108	-0.882002	-0.894175	-1.07137	-0.112941	-0.238015	-0.505676	0.728702	0.335499	0.116119	1.42103	-0.305579	0.722136	1.99985	0.898505	0.649209	0.876871	0.461487	1.16306	-2.56759	-0.145782	-0.960083	-1.28585	-0.70071	-0.354153	-0.0380942	-0.333438	-1.20232	-0.661012
ENSG00000110171	O75382	10612	TRIM3	-1.04811	-1.66679	-1.32447	0.48333	0.431252	0.205276	-0.843293	-1.12387	-1.00283	0.290541	0.690733	0.637265	-0.700984	-0.371783	-0.74268	1.04855	1.21636	1.17898	-0.371303	-0.5994	-0.802908	1.78942	1.22378	1.40292	-0.933013	-2.51033	-1.1265	0.482164	0.115645	0.767772	-1.21794	-0.863044	-1.63493	0.966158	0.799209	0.700728	0.22518	-0.601387	0.176378	0.601944	1.37202	0.819758	-0.409382	-0.504472	-0.171382	0.891526
ENSG00000091640	O75391	9552	SPAG7	0.974313	1.57841	1.22863	-0.802456	-0.551219	-0.535558	0.921836	0.980358	1.09909	-0.882074	-1.53159	-1.58684	0.781487	0.469459	0.307129	-0.391489	-0.510275	-1.12195	1.15638	0.915347	0.466377	-0.620093	-1.29368	-1.05159	-0.397919	-0.0379479	0.710162	0.349334	-0.0146562	-1.86191	0.301891	-0.884068	-0.493352	-1.49263	0.102277	-0.765544	1.11836	2.1062	1.59601	-0.571195	-0.43223	-0.96454	0.677167	0.159204	2.03053	-0.319381
ENSG00000196504	O75400	55660	PRPF40A	0.902628	0.37895	0.478007	1.38491	1.23912	1.15303	1.23899	0.486798	1.46131	0.736423	-0.294045	-1.78436	-0.842176	-0.6263	-0.862742	-0.693129	0.307474	-0.193713	-1.58272	-1.02329	-1.6789	-0.621355	0.228072	0.207003	1.51961	0.534864	0.240419	-0.541582	-1.74613	0.113623	-1.06744	-0.952557	0.0517546	-1.80289	-0.849351	-1.33615	1.59898	0.0645388	1.50097	-0.139221	-0.457583	0.457292	1.11584	1.59898	0.300584	0.0346711
ENSG00000147526	O75410	6867	TACC1	0.690963	-0.325419	0.54336	-0.480477	-0.185193	-0.632276	-0.359628	0.160756	0.441382	-1.27093	0.188637	1.00826	1.44514	-0.26732	-0.554082	0.0677668	-0.551983	0.161464	1.80307	1.61193	0.80491	-0.754294	-0.704511	-2.84152	-0.671164	-2.41568	-1.30757	1.23165	1.07229	1.03324	-0.998623	-1.37936	-1.9011	0.404154	0.192678	0.817052	0.366346	-0.126895	0.154015	1.0002	0.196655	0.395366	0.615072	-0.272614	1.2064	0.558929
ENSG00000146830	O75420	64599	GIGYF1	0.231704	-0.917389	-0.634743	-0.209261	0.631663	-0.68523	-0.500213	-0.730541	-0.583681	-1.50016	-1.29521	-0.756685	0.258417	1.33352	1.59424	-1.03059	-0.518918	1.62527	1.61647	0.0739009	1.31288	-0.0405105	1.41089	-0.685832	-0.691594	-0.950018	-0.753622	-2.0002	-0.82291	-0.783071	0.503592	-0.331751	0.215832	-1.45321	-1.02878	-1.43852	1.22627	0.405532	1.10858	0.507188	0.326466	0.64413	1.12902	1.41607	1.32971	-0.183359
ENSG00000128654	O75431	10651	MTX2	-2.0797	-1.04252	-0.717545	0.639054	1.0911	0.858599	0.199332	-0.749612	0.0578757	2.02479	0.412284	1.07932	-1.51311	-0.713815	-0.141825	0.915863	0.151873	0.391554	-1.2988	0.0417832	-0.142631	-1.24702	0.959478	0.823667	-0.239212	-0.00896544	-0.756904	1.82132	2.08451	1.93566	-0.800034	-0.959134	-0.897586	0.615476	0.725612	1.61134	-0.913691	-0.438546	-0.496195	0.406593	-0.147505	0.245485	-1.00814	-1.17829	-0.755319	-0.101184
ENSG00000183648	O75438	4707	NDUFB1	-1.14381	0.0922341	-0.360441	0.60502	0.336391	-0.341173	0.507582	0.771299	-1.02692	2.0072	1.79163	0.95515	-0.990006	-0.905887	-0.758595	1.25091	0.641261	1.36633	-1.17604	-0.796108	-1.33774	-0.657127	-0.195594	-0.63556	0.234695	-1.5727	-1.88732	1.81983	0.29163	0.264185	-0.359274	0.451955	0.167506	1.74089	1.37224	1.86153	-0.454207	0.380648	-0.624851	-0.106706	0.432581	-0.297986	-1.31755	-0.441728	-1.20602	-0.0437594
ENSG00000164105	O75446	8819	SAP30	-0.492421	0.661252	0.774966	-0.156851	-0.729229	0.347796	0.536889	1.64777	1.08294	-0.776156	-1.47267	-0.739542	0.12863	0.834022	1.03139	-1.63132	-0.784787	-0.65129	0.458016	1.16289	1.41799	-1.93605	-0.854496	0.140262	0.70781	0.771928	0.565101	-0.89953	-0.815163	-0.298106	0.808167	1.4629	1.03648	-2.09354	-1.32302	-0.782524	0.706525	1.04888	0.357389	-0.772918	-0.97782	-1.02841	1.19666	1.59129	0.358908	-0.340159
ENSG00000164985	O75475	11168	PSIP1	0.853565	-0.503323	0.33332	-0.60922	-1.01302	-0.671906	1.14298	1.49755	1.31778	-0.926637	-1.57165	-1.50444	1.18258	1.42461	0.808342	-1.0731	-0.768284	-1.0581	0.708667	0.735934	0.76352	-0.708236	-0.329125	-0.0318132	1.11305	0.146563	0.760595	-0.316861	0.489755	-0.673142	0.715099	0.43611	1.0404	-1.47217	-1.4745	-1.42306	0.895775	1.70076	0.855123	-0.968784	-1.33647	-0.949919	0.979391	1.24755	-0.429762	0.0666657
ENSG00000107566	O75477	10613	ERLIN1	1.16703	0.340812	0.995414	-0.700093	-1.35536	-1.50626	1.15708	0.896997	0.777155	-0.802396	-1.24434	-1.39847	1.4432	0.910591	0.778497	-1.16398	-0.907242	-0.905585	0.49787	0.986749	0.873971	-0.631209	0.137396	-0.347828	0.729806	1.27721	1.72013	-1.57336	-1.32888	-1.96533	0.72123	0.685576	1.1379	-1.24183	-1.33773	-0.207791	0.709395	0.612897	0.0794764	-0.108292	-0.79093	-0.622318	0.846205	1.04747	-0.482778	0.310715
ENSG00000076716	O75487	2239	GPC4	1.36353	1.8983	2.22647	-0.698126	-0.580966	-0.309709	1.42791	0.93713	0.58596	-1.51601	-0.410406	-0.417282	-0.119128	0.917566	0.396868	-0.928149	-1.26856	-0.410148	-0.478373	-0.130131	-0.193304	-0.960756	-0.59182	-0.740882	1.29837	1.42143	1.47469	-0.97854	-1.23809	-0.75076	1.30739	1.21004	1.3467	-0.478776	-0.424507	-0.34801	0.803855	0.918794	0.490679	-0.731611	-0.713534	-0.802666	-0.148779	0.112774	0.111756	-1.44401
ENSG00000213619	O75489	4722	NDUFS3	-1.71188	-1.45769	-1.2415	0.0508479	0.576094	0.834441	-0.541055	-0.603803	0.0844005	1.37505	1.51456	1.77206	-1.06351	-0.957804	-0.143479	1.10154	0.473429	1.44156	-0.972536	-0.509817	-0.226159	-0.524052	0.38798	0.341324	0.268564	-1.73208	-0.493615	-0.183385	0.878518	0.128416	1.25396	0.167394	-0.0366741	0.801994	0.547346	1.66683	-1.78504	-0.466666	-1.36242	-0.634441	-0.469654	-0.17996	0.21524	-0.609321	-1.5119	0.615006
ENSG00000198721	O75521	10455	ECI2	0.429872	0.461372	0.826109	-0.678509	-1.98304	-2.2082	1.30003	1.54609	0.0368089	0.242976	-0.700709	-1.26322	0.717126	0.799428	0.698997	-0.100848	-0.641184	-0.845096	1.0018	1.1413	0.624174	-0.0505763	-0.554961	-0.799742	0.779249	0.734808	0.94559	-1.18093	-1.64565	-1.43924	1.01541	0.948051	1.07739	-0.247259	-0.666237	-0.425811	1.05636	1.23188	0.718834	-1.2576	-0.738284	-1.40757	0.962205	1.01831	0.333803	-0.394947
ENSG00000131773	O75525	10656	KHDRBS3	-0.807014	-1.474	-1.59227	1.1228	1.18523	1.25795	-0.83092	-1.21535	-0.914985	0.929381	0.92174	0.566775	-0.67472	-0.785696	-0.691178	1.23719	0.656578	0.345417	-0.553375	-0.884184	-0.79659	0.970614	0.96866	1.05796	-1.05074	-1.00512	-1.48921	1.35809	0.79293	1.34419	-1.39926	-1.40744	-1.18955	1.25883	1.32431	1.14995	0.0232509	-0.581574	-0.22787	0.646369	0.275348	0.744469	-1.35311	-0.630202	0.00825756	0.304032
ENSG00000135801	O75529	27097	TAF5L	1.00691	0.881139	0.896423	0.552512	-0.646834	-2.1071	0.130031	-0.792431	-1.08164	0.559623	0.186387	-0.0886588	0.251631	-1.41995	0.269555	1.5988	-0.24893	1.77231	0.892221	-1.34386	-0.823062	0.760064	-1.13983	-0.0653096	-0.625018	-1.20931	0.425406	-1.25636	0.147124	-0.532603	-2.11831	-0.556574	-1.34929	-0.197247	-0.167157	-0.0354245	-0.180303	-0.602789	-0.79129	1.402	1.7812	1.22613	0.0844914	0.944465	0.249498	1.17834
ENSG00000009307	O75534	7812	CSDE1	-0.884406	-0.104951	-0.454253	0.517274	0.134982	0.209145	-0.31716	-1.40969	-1.15797	1.04397	0.624117	1.0678	-0.805769	-0.98572	-0.575407	2.28278	1.66213	1.53802	-0.336791	-1.27134	-1.14552	0.521824	-0.128492	-0.0245689	-0.343781	-1.21181	-0.508113	1.15485	1.29042	1.02716	-1.58408	-1.26522	-0.898862	0.770488	0.724321	0.835334	-0.975167	-1.50573	-0.836023	1.34005	0.585736	0.994631	-0.847176	-0.805396	-0.194026	0.367594
ENSG00000102984	O75541	55565	ZNF821	-0.825675	-0.580762	-1.04534	0.553283	0.888358	1.20194	-2.21134	-0.865129	-1.54019	-0.0240706	0.793848	0.727637	-1.03314	0.150477	-0.859032	0.890624	0.590541	0.855262	-0.27287	-0.2194	-0.727347	1.67561	0.580811	1.29591	-0.977308	-1.51333	-1.92751	1.27876	1.31853	1.29442	-1.46803	-0.307579	-1.08953	0.428245	0.455881	0.12777	-0.503483	-0.3816	-1.01295	0.492113	0.886126	0.603506	-0.789541	-0.445866	0.551324	0.790429
ENSG00000120688	O75554	11193	WBP4	0.736259	1.55204	1.42026	-0.412344	-0.833759	-0.949385	0.841874	1.51057	0.808198	-0.371616	-0.436771	0.359338	0.485019	0.624361	0.681277	-1.27056	-0.513835	-0.478076	1.1369	0.181039	-0.317189	-1.62861	-1.50543	-1.61955	0.161355	1.03967	0.249109	-1.70871	-1.2215	-1.30867	0.796522	0.731495	1.11591	-0.400771	-0.750376	-0.519573	-0.195023	1.85824	0.920342	-1.63171	0.0285741	-0.73932	1.26566	1.30353	0.572593	-0.678862
ENSG00000180228	O75569	8575	PRKRA	-1.28183	-1.73913	-1.83812	0.809409	1.52719	1.16232	-0.977123	-1.2772	-0.597521	-0.287177	-0.418455	0.00140319	-0.283875	-0.349156	-0.129241	1.09325	0.626528	0.6749	-0.35525	-0.193867	-0.0157728	1.11383	1.30545	1.42944	1.45967	0.0249858	0.00254217	-0.689125	0.280642	0.59375	0.371655	-0.0357643	0.400171	-2.81333	-1.8963	-1.94639	0.0161558	0.855771	-0.412075	-0.273083	0.455495	-0.0275323	0.414687	0.450489	0.484184	1.33733
ENSG00000100784	O75582	9252	RPS6KA5	-1.20755	-1.66676	-2.03074	0.090404	-0.0879305	0.222773	-0.726473	0.330934	-0.553766	0.956611	1.93164	0.155895	-0.278431	-0.294693	-0.409517	0.409872	1.23465	0.213192	-0.368029	-0.947342	-0.588687	2.02872	0.52972	1.05551	-0.196486	0.732211	-1.0922	-0.721713	-0.584286	-0.893474	-2.87043	-0.672226	-1.0922	1.36414	1.42108	-0.0148112	1.30658	0.826118	-0.0278975	0.799989	0.0930146	-0.291981	0.269412	1.2827	0.416119	-0.120408
ENSG00000005810	O75592	23077	MYCBP2	0.439192	0.606919	0.139619	-0.250432	-0.276646	-0.969362	-0.977391	-0.337707	-1.89959	-0.920619	-0.820191	-1.76755	1.10072	-0.388009	-0.50695	-0.0126975	0.0490048	-0.0209901	1.5877	1.56438	0.226125	2.02111	0.323879	1.08949	-1.27769	-0.96869	-1.70714	1.22437	1.1875	1.25555	-1.28404	-1.17454	-1.29679	0.502966	0.160305	0.57013	-0.451538	-0.580439	-0.609022	1.31635	-0.00548764	0.850971	-0.588172	0.298856	-0.637549	0.868788
ENSG00000100116	O75600	23464	GCAT	0.0855035	2.01679	1.14218	-1.52176	0.0520598	-0.684781	1.18874	1.6959	0.307359	0.540443	0.291053	-0.240998	-0.758581	-0.455736	0.278535	-0.799526	0.167776	-0.0624122	-0.720695	0.771563	-0.0607668	-2.59779	0.137732	-0.772579	1.17962	0.994122	1.66552	-0.871238	-1.89883	0.0561641	1.30175	0.627575	1.56958	0.0454752	-0.0295703	0.828683	-0.0365318	0.206399	0.568343	-1.32876	-1.65012	-0.959271	0.0103436	-0.442666	0.486946	-1.14284
ENSG00000107833	O75607	10360	NPM3	0.461679	2.04665	2.82217	-0.752432	-0.316987	-1.99859	-0.162157	-0.724071	-0.34253	-0.270123	-0.718897	-0.056595	0.127897	-0.257317	-0.194614	0.877742	0.557912	0.924744	-0.362768	0.226164	-0.637255	0.0187842	0.158819	-1.42823	0.406582	0.142424	-0.0243806	0.32449	-1.00327	-0.0916769	-0.778706	-0.358794	0.516874	1.12056	-0.0965385	0.0912275	-1.70109	-1.75379	-0.247212	1.61245	0.851995	1.35133	-1.48167	-1.3064	-0.766681	0.890625
ENSG00000120992	O75608	10434	LYPLA1	1.83938	1.9473	1.99759	0.438088	0.440312	-0.521388	0.540223	1.38418	-1.01466	-0.679013	0.13654	-1.63298	0.81037	-0.499661	-0.485757	-0.739196	-0.0884954	-0.133246	-0.493411	-0.782784	-0.633558	0.071268	-0.883933	-1.01718	1.54379	1.04713	2.07987	0.171741	-0.178143	1.00581	1.20826	1.17048	0.393185	-0.538539	0.762168	-0.322682	-0.571811	-0.124553	-0.321691	-0.127409	-0.333598	-1.56234	-0.120748	0.0758803	-1.46235	-0.928899
ENSG00000144028	O75643	23020	SNRNP200	1.14177	1.05291	0.725322	-0.711972	0.182431	0.179827	1.33017	1.59236	1.76435	-1.18574	-1.38823	-1.86019	-0.0821768	0.163931	0.361774	-1.16363	-0.164195	-1.30147	0.082973	0.68039	0.256937	-1.17663	-0.276029	-0.204872	0.780206	0.00784789	0.602701	-1.89559	-0.675097	-1.57496	1.09195	0.797725	1.49068	-1.43919	-1.28057	-0.620743	0.717698	-0.248916	-0.0217867	-0.380271	-1.13878	-0.220605	1.68611	0.258193	1.08257	0.32919
ENSG00000143155	O75663	261726	TIPRL	-1.25949	-0.585067	-1.41588	0.285546	-0.019941	0.175554	-0.637164	-0.315219	-0.891293	1.20595	1.64001	0.781269	-0.6298	-1.05479	-0.850846	1.44508	1.80994	0.946568	-0.731639	-1.15065	-0.829249	1.13988	0.228448	0.712789	-1.25331	-1.52412	-1.44625	1.16257	0.963353	0.838969	-1.38918	-0.956043	-1.29601	0.933622	1.05661	1.1028	-0.236859	-1.10428	-0.0987944	1.02612	0.564067	1.01232	-0.516882	-0.794006	-0.164262	0.676672
ENSG00000138032	O75688	5495	PPM1B	-0.602965	1.90003	-0.12659	1.68085	1.57108	0.916956	1.11885	0.388308	-0.566924	0.900151	0.0972962	-0.563443	0.532882	-0.60659	-0.658267	-0.295917	-0.939209	-1.17504	1.01112	-0.516349	-0.248278	-1.58163	-1.45457	-0.781747	0.235906	-0.154617	0.472239	1.57888	2.332	1.72217	-0.17306	-0.498466	0.463157	-0.326965	0.186695	-0.184159	0.37933	-0.265576	0.50003	-0.389902	-1.25237	-1.20838	0.500675	0.440377	-0.0497107	-0.878433
ENSG00000105963	O75689	11033	ADAP1	-0.505349	-1.45181	-0.852492	1.24445	1.53362	0.960395	-1.10562	-1.29552	-0.713742	0.151501	0.751845	0.900089	-0.917059	-0.692516	-0.641725	1.16124	0.737584	0.564162	-1.11747	-0.871532	-0.648016	1.8519	0.376635	0.579434	-0.885632	0.322459	-1.03126	0.929437	1.15565	1.23607	-1.01426	-1.45733	-0.315785	0.954558	1.07511	1.26675	-0.993306	-0.739098	-1.4873	-0.054963	1.17959	1.30968	-1.04632	-1.33039	-0.325732	0.592988
ENSG00000120800	O75691	27340	UTP20	1.79057	0.71679	1.39423	-1.45229	-1.78441	-1.57508	1.1932	-0.293616	1.35376	0.984386	-0.557549	-0.61518	0.0321224	0.684066	0.403472	0.108199	-0.753444	-0.667057	0.322524	0.669371	0.457648	-1.01153	-0.435499	-0.964689	1.03941	0.185764	0.878801	-0.873018	-2.68116	-2.07356	0.543385	0.496728	0.951158	-0.423159	-0.611373	0.45535	0.715393	0.0873966	0.753626	0.13695	-1.22139	-0.623763	1.34099	0.963912	0.777969	-0.0140227
ENSG00000113569	O75694	9631	NUP155	1.76982	0.44954	1.57737	-0.225952	-0.434771	-1.57528	0.771935	2.1828	1.03135	-0.31749	-0.579567	-1.40558	0.748438	0.126904	0.0685215	-0.252956	-0.458567	-0.53355	0.613869	0.350767	-0.740482	-0.974466	-0.898931	-1.29372	1.62161	0.868356	1.49527	-0.346012	1.20533	-0.196717	0.366329	0.332343	0.930912	-1.20018	-1.51818	-1.45953	0.599477	0.290272	-1.19028	-0.10089	-1.18698	-0.840186	1.3978	0.916529	-0.0701809	0.0403025
ENSG00000102218	O75695	6102	RP2	1.07311	1.12449	0.804113	-0.73219	-0.943271	-0.924173	1.31476	1.25321	0.460107	-1.01285	-0.905836	-1.40955	1.49113	0.734243	0.605511	-1.06732	-1.14784	-1.02934	1.11952	0.658097	0.66642	-0.651018	-0.83111	-0.650192	1.57451	1.2787	1.34638	0.0861619	-1.03524	-1.10527	1.01121	0.921894	0.885017	-0.534024	-0.493971	-1.03812	0.268522	1.02688	0.659553	-1.36967	-0.586789	-1.08758	1.09629	0.646016	-0.515099	-0.433884
ENSG00000198554	O75717	11169	WDHD1	1.37032	0.75898	0.9898	-1.06551	-1.05887	-0.747276	1.0159	1.1646	0.995902	-1.01043	-0.984245	-0.744508	0.843511	0.807438	0.969809	-1.01245	-0.864365	-0.853361	1.05001	0.743328	0.878531	-1.2133	-1.18399	-0.849807	1.45792	1.35504	1.37696	-0.488003	-0.578488	-0.509012	1.18564	0.891471	1.36658	-1.32075	-0.995186	-0.77106	0.344423	1.15078	-0.375962	-0.795194	-0.911277	-1.00326	0.944771	1.02955	-0.665844	-0.757458
ENSG00000170275	O75718	10491	CRTAP	0.911779	1.76312	1.2203	-1.13819	-1.13539	-1.01672	0.0739124	0.640548	0.485724	-1.62136	-1.46555	-1.13343	0.651408	0.602349	0.614489	-1.25861	-1.01479	-0.307981	0.146086	1.19488	0.775937	-0.176649	1.13161	0.0565362	0.940473	1.08091	1.27938	-1.05108	-0.167101	-1.01708	1.14564	0.539956	0.898214	-0.662605	-0.818521	-1.44183	1.03192	0.836866	1.34171	-0.730206	-1.35874	-0.64424	0.337896	0.685585	0.70693	-0.48163
ENSG00000115840	O75746	8604	SLC25A12	-0.914365	-0.50088	-0.861743	0.411871	0.447221	0.0682394	-0.819632	-0.573541	-1.34062	1.3773	1.07985	0.780911	-0.738264	-1.79197	-0.80504	2.04594	1.03046	1.07564	-0.944372	-0.560729	-0.718585	1.00808	0.663324	0.580912	-0.795794	-1.2893	-1.24213	1.15328	1.47847	1.11232	-1.40088	-1.0672	-1.80952	0.801445	0.855512	0.816244	-0.327655	-1.09099	-0.521913	1.07878	0.983358	0.830376	-0.226824	0.381684	-0.904008	0.116773
ENSG00000099864	O75781	5064	PALM	-2.08824	-1.20861	-1.75758	0.518046	0.468375	-0.0632505	-0.0860677	-1.11805	-1.36412	0.318885	-0.256302	-1.09338	0.0749582	-0.054335	0.0167308	0.973754	0.684342	1.02569	0.265419	0.42049	0.129368	0.838296	1.53211	1.82347	-2.63287	-1.07308	-2.28336	0.195898	-0.356396	0.274336	-0.766955	-0.250546	-1.18728	0.956282	0.965394	0.920366	0.0450712	0.343478	0.232203	0.434573	0.554035	0.732065	-0.655974	0.65325	0.183622	0.687447
ENSG00000182220	O75787	10159	ATP6AP2	-1.82319	-1.23951	-2.01275	1.01026	1.66656	1.63915	0.0743893	-1.1634	0.511474	1.20714	-0.10016	1.07449	-0.765307	0.240624	0.147575	0.349865	0.142901	0.0181821	-0.501776	-0.0567057	0.243144	-1.34999	0.0434465	0.643594	-0.969416	-1.59042	-0.964649	1.9393	1.33787	1.08727	-0.626645	-0.457479	-0.75649	1.34748	1.63895	1.48609	-0.676143	-0.778192	-0.703377	0.389753	0.292594	0.256791	-0.635888	-0.841376	-0.705403	0.240497
ENSG00000104889	O75792	10535	RNASEH2A	1.42877	-0.517855	1.05238	-0.719582	-1.77278	-1.4801	0.596422	0.89492	0.73783	-0.800664	-0.934983	-0.946689	0.923431	0.745915	0.754988	-0.695501	-0.615799	-0.670175	1.23896	1.29877	1.25634	-0.0269714	-0.87013	-0.877493	1.46909	1.0167	1.1296	-0.933831	-1.16022	-1.36441	1.05081	1.18922	1.2322	-1.11672	-1.27337	-0.258289	-0.0119429	1.3757	-0.241343	-0.981094	-0.78859	-0.11583	0.91784	1.17614	-1.00528	-0.14531
ENSG00000136870	O75820	7743	ZNF189	-1.26459	0.586722	0.0813793	0.241292	-0.174672	-0.677359	0.589283	1.03632	0.615903	0.0403306	-1.07549	-1.2565	0.260022	0.904457	0.699849	-0.647787	-1.21422	-0.0997125	0.274624	2.52113	0.708436	-2.02242	0.84583	-0.972829	-1.23577	-1.28028	-1.84576	-0.814693	-0.299441	-0.53415	-0.0826263	-0.106707	-0.311946	-1.30416	-1.35375	-0.587824	1.2904	0.888448	0.988468	1.12845	1.74116	-0.150315	0.748439	0.129536	0.272257	1.29604
ENSG00000130811	O75821	8666	EIF3G	2.30131	1.40543	2.17012	-1.42065	-0.543879	-1.15693	0.281021	0.461427	0.0561624	-0.577174	-0.422945	-0.285405	0.0784621	-0.402106	0.413425	-0.198021	0.298325	-0.52447	0.661533	0.0343452	0.165273	0.275147	-1.04493	-2.02547	0.054259	0.636137	0.512622	-1.35604	-0.999061	-1.89209	0.613161	0.0859379	1.33038	-0.118349	-1.19412	-1.10905	0.601903	0.602827	2.07607	-0.607996	-0.410257	-0.449256	0.981688	0.628247	1.64091	-0.866623
ENSG00000159231	O75828	874	CBR3	-0.789577	-0.537583	0.46845	-2.26701	-0.661467	-0.396827	-1.82783	-0.235857	0.418609	-1.49516	-0.554672	-0.0985729	0.763399	0.282356	0.494369	-0.469653	0.0723648	0.295621	2.15226	1.1321	1.10744	0.935788	0.465731	0.745714	-0.844577	-0.844577	-0.844577	-0.469737	-0.844577	-0.844577	-0.844577	0.526048	-0.236996	-0.447924	-0.525772	-0.844577	0.977536	1.85148	0.281893	-0.42644	-0.844577	-0.255795	2.1476	2.39127	0.748628	0.611052
ENSG00000109929	O75845	6309	SC5D	0.446728	-0.624141	-0.307565	1.05683	-0.187733	0.28277	0.1011	-0.246569	-0.57694	1.86844	1.33437	0.58742	-0.994234	0.0402521	-0.579471	1.63281	1.28951	0.768608	-1.6465	-1.36295	-1.93996	-0.332971	0.00272909	-0.612516	0.163569	0.0539575	-1.14555	1.63861	-0.247525	1.24634	-1.32018	-0.126441	-0.202759	1.08101	1.19514	1.9358	0.080166	-0.218877	-0.776531	0.962365	-0.482881	0.5391	-1.44563	-1.99253	-0.680428	0.120019
ENSG00000138413	O75874	3417	IDH1	0.449568	0.121788	-0.100227	0.85417	0.859485	1.09063	-0.0327056	0.204994	-0.471641	1.45785	1.88625	0.771962	-0.771793	-0.642635	-0.910238	1.23483	0.568035	0.29443	-1.23863	-1.6741	-1.70485	0.00597498	-1.22002	-1.03313	0.858194	0.374792	0.237877	1.22519	0.228703	1.09619	0.467131	0.546906	0.60219	1.277	1.08853	1.61869	-0.109768	-0.104737	0.14738	-0.445528	-0.0702442	-0.543266	-1.33194	-1.24196	-1.00216	-1.76125
ENSG00000089050	O75884	10741	RBBP9	1.31032	1.29282	1.20893	-1.34026	-0.634269	-1.86362	1.17631	1.02286	-0.682371	-0.899065	-1.02292	-2.02467	0.918226	0.698848	0.0621664	-0.218031	-0.557359	-0.539179	0.493677	0.294225	0.412997	1.06142	-0.0496918	-0.121357	0.839203	0.0207036	1.40278	-0.346549	-0.0798574	-0.468213	0.967417	1.02042	0.996264	-1.74645	-1.39735	-1.00212	1.70909	1.21923	0.736202	-0.356734	-0.632067	-0.920572	0.492569	0.475626	-0.750612	-0.255899
ENSG00000115145	O75886	10254	STAM2	-1.37816	-1.50793	-1.14999	0.157753	0.0300827	-0.511535	-0.173111	-1.11144	-0.60178	0.880678	-0.585109	-1.11161	0.72564	-0.432118	0.507156	0.195811	-1.35467	0.00938799	1.42331	0.966505	2.1592	0.84804	0.900512	1.11337	-2.00324	-1.99274	-1.0562	0.64824	1.1963	0.260123	-1.58686	-0.745543	-1.19155	-0.273434	-0.0809547	-0.396087	0.927269	-0.592937	0.818474	0.964337	0.35836	0.140478	0.24893	0.743645	1.00213	1.01779
ENSG00000077264	O75914	5063	PAK3	-1.17216	-1.91836	-1.5723	0.70067	1.58661	1.02668	-1.0945	-1.71895	-1.06752	0.445373	0.662129	0.257538	-0.446684	-0.937239	-0.517595	0.543216	0.866913	0.593731	0.722584	0.429503	0.285658	1.00771	0.666166	0.650836	-1.43058	-1.91802	-2.08245	1.09523	1.23008	1.18435	-1.21782	-0.995579	-1.10516	0.0319846	0.180506	0.184974	0.157097	-0.786915	-0.180383	0.848906	0.390854	0.393913	0.98168	1.1071	0.137818	0.42998
ENSG00000144746	O75915	10550	ARL6IP5	0.790384	0.796934	-0.0951609	0.470972	0.706505	-0.247155	-0.142188	0.869351	-1.33685	0.970931	1.62846	0.539807	-0.697972	-1.06216	-0.764633	1.04136	0.913886	0.0835059	-2.23623	-1.2317	-1.78012	0.793726	0.162437	-0.174084	-0.514303	-0.27091	0.767729	1.34862	1.3601	1.02443	-0.308488	0.0444936	-0.271295	1.56945	1.65955	1.43836	-0.869095	-0.309268	-1.37598	0.144596	0.386172	-0.0421924	-1.71904	-1.39252	-1.06802	-0.573213
ENSG00000137100	O75935	11258	DCTN3	-0.867605	-1.40151	-1.50854	0.899939	0.654407	0.934361	-0.813179	-1.07313	-1.20313	1.05524	0.984116	0.261103	-0.0944061	-1.14695	-0.847481	1.17352	0.302446	0.45078	-0.246976	-0.806769	-0.501978	2.01873	0.611795	1.16522	-0.79429	-1.61481	-1.77714	0.723399	1.00168	0.887713	-0.385021	-0.707494	-0.620727	1.3382	1.0073	1.77283	-1.5627	-0.418727	-1.30427	0.230032	0.0610654	0.65934	-0.0614055	0.256998	-0.795454	1.12709
ENSG00000167863	O75947	10476	ATP5PD	-0.919011	-0.474692	-0.124829	0.557295	0.473076	0.46223	-0.0024522	-0.252689	-0.0959901	2.03426	1.50787	1.21967	-0.98235	-1.73463	-0.929584	1.77097	0.512484	0.441436	-1.2567	-1.2503	-1.20145	0.403248	-0.0998328	-0.058036	0.383245	-0.51261	0.042537	0.529424	0.861997	0.459482	0.518936	0.204783	0.399684	1.8007	1.58479	1.7361	-2.33119	0.335386	-1.05306	-0.858886	0.497899	-0.345623	-1.36372	-0.229345	-1.03	-0.153832
ENSG00000137094	O75953	25822	DNAJB5	-1.23165	-0.863454	-0.382581	1.16192	-0.0909816	0.369863	0.0535811	0.466431	-0.689454	0.912475	1.54678	0.334696	-1.19744	-0.709647	-0.798874	0.919323	1.82973	1.67001	-0.735541	-1.41472	-1.69248	0.170153	0.172757	0.199115	-1.25591	-1.22747	-1.33438	0.843487	0.526251	0.568601	-0.628228	-0.272184	-0.665804	1.15691	0.996291	1.35387	-0.627927	-1.22198	-0.173612	1.04998	0.993084	1.06105	-1.65228	-1.26028	-0.588908	0.611377
ENSG00000137312	O75955	10211	FLOT1	-0.398585	-0.0807543	-0.724223	-1.52154	-1.47303	-1.366	-0.126521	-0.112197	0.774217	-1.28683	-0.653327	-1.09884	0.608776	0.399471	0.204631	-0.29662	0.324111	-0.142344	0.125031	0.65628	0.715	2.25692	1.4819	1.73447	-1.98341	-1.65095	-1.32677	-0.025068	-0.545843	-0.324497	-0.627009	-0.489023	-0.836758	-0.316417	-0.48016	0.145013	-0.0414782	1.02327	0.0274418	0.0764657	1.35368	1.38676	-0.369404	0.583325	0.257342	1.32122
ENSG00000038382	O75962	7204	TRIO	-1.45087	-1.43835	-1.37298	0.934778	1.22053	0.865708	-1.0272	-1.50276	-0.893492	0.905802	0.540879	0.207383	-0.809375	-0.620528	-0.588424	0.940349	0.658495	0.938553	-0.288222	-0.370826	-0.507363	1.35838	1.08659	1.21295	-1.209	-1.71354	-2.26952	0.922523	1.316	0.781955	-1.4162	-1.06438	-1.12477	0.297006	0.352784	0.066205	-0.0368086	-0.6989	-0.0947953	0.788504	0.665281	0.465019	0.317082	0.850925	-0.0831913	0.728136
ENSG00000167283	O75964	10632	ATP5MG	-1.36908	-0.951611	-0.444123	1.44028	0.646716	0.926015	0.330962	-0.217668	0.288275	2.44649	0.928007	1.37265	-1.26908	-1.41565	-0.343324	0.663821	0.0193436	0.410186	-1.17324	-0.937458	-0.421894	-0.929189	-0.178311	0.177889	0.0249272	1.04083	1.46886	1.53972	-0.463653	0.804214	-0.967619	-0.508959	0.155056	1.96053	0.644572	0.996576	-1.39145	-0.174413	-0.0381003	-2.38755	-0.160321	0.424497	0.0847766	-0.980546	-0.393731	-0.836694
ENSG00000107186	O75970	8777	MPDZ	1.05434	1.54205	1.8017	-0.882749	-1.1597	-0.849445	1.35641	1.5694	0.940338	-1.11548	-0.804124	-1.18772	0.620501	0.426005	0.354917	-0.908407	-0.633777	-0.63649	0.397833	0.227088	0.434068	-0.742829	-0.783085	-1.02086	1.44602	1.11676	0.947777	-1.49379	-1.77568	-1.43631	1.36581	1.18541	1.55498	-1.02553	-0.309649	-0.700103	0.816449	0.720494	0.614445	-0.890607	-0.22499	-0.673176	-0.0722587	0.123621	0.030391	-0.839473
ENSG00000108582	O75976	1362	CPD	0.265326	0.262934	1.08009	1.0167	1.65209	1.33671	0.611275	-0.846906	0.789705	1.39907	1.03472	0.386783	-0.273166	-0.2576	0.199187	-0.565703	-1.59247	-0.606052	-0.993461	-0.748936	-0.0793559	-1.84984	-1.56065	-0.660453	0.951292	1.54351	2.5153	1.73195	0.455819	0.418224	-0.0778934	-0.640506	0.13004	0.852643	0.338728	-0.213911	-0.615587	-1.45893	-0.543695	0.522058	-1.03207	-0.906515	-0.904305	-0.937573	-1.02525	-0.0687275
ENSG00000108010	O76003	10539	GLRX3	1.17101	1.49093	-0.0985834	0.285321	-1.14064	0.801027	1.24457	-0.234501	1.39945	0.705908	-0.524979	0.212089	0.383486	-0.271979	0.499074	-0.690276	-1.56833	-1.31636	0.659072	0.321699	0.902372	-1.80056	-1.60579	-0.823986	1.10821	0.31609	0.917894	0.345074	0.382684	0.232959	2.19738	1.0843	0.267812	0.0123713	0.284553	1.1552	-0.438407	0.272601	-1.28153	-1.6434	-0.963522	0.0412567	-0.426722	0.426987	-0.12421	-0.661366
ENSG00000171490	O76021	26156	RSL1D1	2.12899	0.570215	1.17275	-1.10551	-1.47996	-1.63976	1.06429	0.70239	1.40819	-0.402048	-1.3355	-1.02876	0.850432	0.853789	-0.124578	0.847326	0.416902	-0.43425	-0.576072	-0.329294	-0.610725	0.113424	-0.29168	-0.770564	0.507019	1.30532	0.267169	-0.964989	-1.49838	-0.955769	-0.447418	-0.0421002	0.185688	-1.2896	-1.58941	-1.90187	1.62553	0.0566729	1.48771	0.169	-0.333163	0.287633	0.170061	1.00206	1.44919	0.349999
ENSG00000149809	O76062	7108	TM7SF2	1.5872	-0.612657	1.1741	1.06498	1.5065	0.364888	-0.552407	-0.772545	-0.712475	0.235578	1.04972	0.598742	-0.132143	-0.00595658	-0.452596	1.89165	-0.324218	0.198721	-1.46056	-0.851581	-1.63308	-0.00836948	-0.589366	-1.56412	0.650961	0.18427	1.00503	1.71733	0.594342	1.30526	0.483567	0.481076	0.722639	0.727611	0.273358	1.40816	-0.78652	-0.371618	-0.641058	0.22485	-0.397765	-0.142033	-1.61982	-2.03216	-1.23708	-1.64951
ENSG00000173267	O76070	6623	SNCG	1.69762	0.776675	0.260298	2.76119	0.19457	0.566129	0.537978	0.402841	0.659897	1.42104	-0.635534	0.530732	-0.294324	-0.785624	-0.743322	-0.322254	-0.973111	-0.702317	-0.593149	-0.990142	-0.868363	-0.729063	-1.30498	-0.866783	1.7718	1.75637	1.41947	2.04056	1.06268	0.702057	0.674915	-0.0808993	-0.204918	-0.109482	-0.975287	-0.571056	-0.975287	0.265219	-0.975287	-0.16617	0.131547	-0.523061	-0.975287	-0.366732	-0.975287	-0.975287
ENSG00000107372	O76080	7763	ZFAND5	0.933484	0.691977	1.13492	-0.413751	-0.625578	-0.499555	0.898652	0.960305	0.496822	-0.474704	-1.30318	-1.64198	-0.108944	-0.397222	0.482143	1.65859	0.857827	0.740612	0.311928	-1.00187	-0.191731	0.948295	-2.23015	-1.2269	-0.549452	0.383524	-0.281026	-1.26008	0.303194	0.00657344	0.202241	0.420493	0.724659	-2.64774	-1.67597	-2.14253	1.26977	0.365891	0.368664	0.967021	0.797813	0.471533	0.271787	-0.34858	0.146396	0.974053
ENSG00000153904	O94760	23576	DDAH1	-1.14991	-0.0748787	-0.865443	-0.913251	-0.933295	-0.650369	0.617652	1.48793	1.02008	-1.42917	-1.321	-1.53986	1.14565	1.86099	0.865887	-0.67514	0.350688	-0.522644	0.963136	0.0482417	1.18755	0.481064	-0.135234	0.181328	-0.247048	0.111494	-0.0197782	0.706895	0.471787	0.441358	1.32191	1.68794	0.667932	-0.589147	-1.28702	-0.369773	1.3726	1.87344	0.624541	-1.5275	-0.858247	-1.42864	0.382528	0.294771	-0.393403	-0.912614
ENSG00000176956	O94772	4062	LY6H	-0.80332	1.41833	-0.143854	1.42011	0.924582	-0.129881	-1.9222	0.410074	-2.00552	-1.24396	0.736913	-0.987636	-0.273098	0.771589	-0.648901	0.428771	1.3833	0.273867	0.453134	-0.731217	-1.06383	0.174229	0.552382	1.00613	-1.18572	-1.11526	-0.799438	1.36587	1.0878	1.32332	-1.17503	-0.636824	-0.800989	1.10329	1.08603	1.09158	-0.731342	-0.636013	-0.761592	0.583538	0.914338	0.753009	-1.42479	-1.16739	-0.914303	0.675239
ENSG00000149480	O94776	9219	MTA2	1.33897	-0.912705	0.885293	-0.619261	-2.5753	-1.58417	-0.433453	0.00373161	-0.00940214	-0.0635042	1.45783	0.983471	0.202928	-0.281107	-0.231257	0.992012	0.894268	1.17326	-0.185871	-0.179131	-0.571433	1.32196	-0.888527	-0.718609	-0.339319	-0.401482	-0.279682	-2.24688	-1.44765	-1.19718	1.30365	0.611739	1.20055	-0.87989	-1.87982	-1.0495	1.11399	1.0835	0.240816	0.516577	0.706813	0.068608	0.274687	0.792443	0.353894	0.175478
ENSG00000077080	O94805	51412	ACTL6B	-1.08984	-1.42349	-1.564	1.01197	1.38415	1.20123	-0.938877	-1.35481	-0.949011	0.791499	0.596725	0.669689	-0.865121	-0.75023	-0.630286	0.99296	0.704165	0.892724	-0.543615	-0.417179	-0.687687	1.04255	0.829271	1.09721	-1.26859	-1.04826	-1.97389	0.940597	1.18339	1.12396	-1.42301	-0.50624	-1.20918	0.871097	1.15151	1.09316	-0.406972	-1.08649	-0.700559	0.695516	0.827809	0.660903	-0.746154	-0.134798	-0.286678	0.576617
ENSG00000171368	O94811	11076	TPPP	-1.43779	-1.23661	-1.73072	1.59046	2.03315	1.19839	-0.696958	-0.611371	-1.00851	0.895505	0.679831	0.822418	-0.73916	-0.384376	-0.666223	0.980553	-0.174079	0.24971	-0.194116	-0.244788	-1.06361	0.59339	0.750257	0.394642	-1.20388	-0.95093	-1.12638	1.5316	1.747	1.34096	-1.56674	-0.876095	-1.02351	1.17526	0.745906	0.954684	-0.440371	-0.416273	-0.41428	0.517019	0.562423	0.552313	-1.60247	-0.394479	-0.302526	-0.0564703
ENSG00000101746	O94818	8715	NOL4	-1.58077	-1.4305	-0.551659	1.69886	1.37496	0.442745	-0.958149	-1.11917	-1.80056	0.888885	1.37515	-0.122947	-0.338506	-0.274088	-0.418394	0.690423	1.05392	1.31656	-0.236105	-0.41925	-0.80502	0.315389	0.426737	0.4715	-1.37447	-1.42298	-1.20655	1.47581	1.20618	1.09333	-1.50585	-0.642537	-1.07231	0.974448	0.97863	1.07605	-0.913192	-0.895332	-0.952388	0.445793	0.989039	0.513106	0.209017	0.000530696	-0.761184	0.512874
ENSG00000176595	O94819	9920	KBTBD11	-1.03087	-1.97026	-1.79204	0.58611	0.469663	0.381242	-0.960236	-0.794997	-0.665578	0.885084	1.22037	1.35712	-0.748963	-0.0359599	-0.14423	1.29782	0.934139	1.246	-0.867758	-0.79105	-0.635273	0.921282	0.408781	0.729589	-1.4016	-1.33899	-1.55242	0.870606	-0.0420955	0.506763	-0.822188	-0.376291	-0.758207	1.24434	1.42708	1.15887	0.202319	-0.314481	0.137299	1.40451	0.798371	1.10489	-1.52124	-1.6123	-0.191379	0.032284
ENSG00000154174	O94826	9868	TOMM70	-1.22048	-1.02868	-1.02258	0.759983	0.556889	0.374122	-0.589184	-0.756761	-1.05691	1.53118	1.15723	0.981008	-1.04676	-1.20944	-0.878618	1.53098	1.06865	0.868325	-0.818017	-0.655301	-0.985392	0.621077	1.00021	0.818478	-1.364	-1.44541	-1.22175	1.11053	0.961761	0.794004	-1.5764	-1.02883	-1.61266	0.744991	0.913004	0.865011	-0.19287	-0.83859	-0.281298	0.978772	0.796345	1.0201	-0.224352	-0.691978	-0.366729	0.975644
ENSG00000163531	O94856	23114	NFASC	-0.957685	0.380465	-0.78941	0.804515	1.2303	-0.220599	-0.825391	-0.661597	-1.65477	0.446549	1.62259	0.091074	-0.927454	-0.328245	-0.902793	0.542892	1.53914	1.45051	-0.779526	-1.2267	-1.18476	1.24258	0.856419	0.251899	-0.76205	-1.09262	-1.09133	0.994816	1.1952	1.05414	-1.13275	-0.56383	-0.828263	0.853421	0.833453	0.885736	-0.285217	-0.732319	-0.420277	0.943958	0.909692	0.674467	-2.17881	-1.31517	-0.495185	0.570009
ENSG00000014123	O94874	23376	UFL1	1.67404	1.01943	1.48039	0.00925685	-0.0817881	-0.375103	1.41701	1.45547	0.930528	-0.871637	-0.714315	-1.1269	0.761145	0.552452	0.199843	-1.28197	-1.20898	-1.45299	0.389837	0.0842481	0.0717096	-0.982418	-0.732392	-1.21686	1.0972	0.8293	0.811793	-0.87039	-0.525435	-1.51961	0.413152	0.395161	0.497429	-1.6217	-1.33471	-1.18019	1.73534	0.738836	1.78989	-0.746809	-0.833418	-0.643068	0.325358	0.429988	1.2118	0.0394811
ENSG00000154556	O94875	8470	SORBS2	-0.378566	-1.38281	-1.32978	1.575	1.84192	1.67196	-0.201633	-0.648179	-0.174585	-0.389895	-0.471355	-0.318871	-0.212115	0.0551813	-0.223919	0.0230982	-0.492071	0.238542	-1.7931	-1.1384	0.0826954	1.49131	0.957374	1.2182	-0.0535064	-0.624914	-0.88094	0.703112	1.43034	0.663059	-0.516913	0.0971739	0.166368	-0.867766	-0.430995	-0.484833	1.08888	-0.981075	0.455089	0.740549	0.455089	0.0658182	-1.85509	-2.59303	0.250304	1.02841
ENSG00000172765	O94876	23023	TMCC1	-2.39042	-0.824379	-0.084647	1.71485	1.55815	1.11031	-0.951302	-1.14396	-0.257841	1.36375	0.182107	0.194863	-1.01489	0.243938	-0.281014	-0.447999	-0.0675281	0.861101	-0.846799	0.585685	-0.15253	-1.05788	0.934181	0.772253	-1.60448	-0.438743	-0.558915	1.18613	1.57315	1.07104	-1.65947	-1.32595	-1.64157	0.193979	-0.245406	0.143992	-0.669889	-0.656965	-0.688787	0.868221	0.335797	0.810991	-0.144749	0.129558	-0.083981	0.799415
ENSG00000106443	O94880	9678	PHF14	-0.556288	-1.26482	-0.92815	1.44516	1.393	0.789998	-0.596517	-1.03454	-0.570258	1.816	1.50765	1.04479	-1.12039	-1.04912	-1.17505	0.564228	0.908302	0.612488	-0.763365	-0.0752402	-0.998309	-0.427854	0.350851	0.127443	0.448437	-0.0620932	-1.2341	1.93999	1.89364	1.62845	-0.986328	-0.83688	-0.421163	0.422909	-0.0376656	0.135194	-1.14771	-0.883736	-0.804814	0.95651	0.750018	0.453426	-1.40886	-0.77167	-1.18788	-0.101781
ENSG00000147475	O94905	11160	ERLIN2	1.75919	1.53204	0.0775273	-0.261326	-0.095097	-0.189215	0.909169	0.991413	1.2552	-1.14179	-0.963839	-0.874893	1.10427	0.907143	0.678712	-1.2493	-1.27157	-1.43297	-0.425412	0.399265	0.731584	-1.36364	-0.477592	-0.598854	1.25183	1.42835	1.20251	-1.57716	-0.736919	-0.288942	-0.320559	-0.471006	-0.233258	-2.32651	-0.871817	-0.887713	1.67028	0.468782	0.368003	0.502881	-1.5221	0.309862	0.202401	0.236934	0.981207	0.0616555
ENSG00000101161	O94906	24148	PRPF6	1.24686	-0.15936	-0.368795	0.6356	0.414616	0.97767	1.4247	0.329289	2.04669	-1.07541	-2.08271	-1.50585	0.478908	-0.378636	-0.352567	-0.371303	-0.0479306	-1.4285	-1.39199	0.660691	-0.264914	0.267709	0.365863	0.579359	-0.963362	-1.18019	-0.405593	1.16516	1.71796	0.989247	-1.25064	-1.43659	-0.571011	0.262629	0.172792	0.222567	-0.461042	-1.8987	-0.17561	0.701895	-0.945144	0.980674	-0.0932827	-0.757213	0.588945	1.15003
ENSG00000075539	O94915	285527	FRYL	1.19917	-0.217688	-0.609178	-1.00624	-0.0615883	-0.816929	-0.025898	0.68153	-0.207836	-1.42345	-0.657545	-1.68354	1.82008	0.791421	0.885976	-1.48044	-0.108914	-0.820904	1.24724	0.852234	1.37252	1.20439	-0.420987	-0.513418	-0.210618	-0.443007	-0.417677	-1.73884	0.254009	-0.464781	0.266083	0.182182	0.771931	-1.81445	-2.02017	-1.80142	0.481034	0.844587	0.939219	-0.210039	0.504974	-0.459792	0.492321	1.17071	1.04204	0.477735
ENSG00000149218	O94919	23052	ENDOD1	0.981519	-2.09797	-1.00942	-0.158406	-0.575727	-0.327397	0.513364	-0.554374	1.30877	0.62029	1.39171	1.12077	1.1267	0.0912136	-0.0927945	1.56501	0.0627753	0.865573	-1.75093	-1.08739	-0.836715	-0.842002	0.0611822	-0.375758	-0.801481	-0.345453	-0.694699	1.06821	0.930563	0.888567	-0.521202	-0.441971	-0.976842	1.71764	1.52058	1.57816	-1.36376	-0.307694	-0.719893	0.640484	0.357972	0.583987	-1.01067	-2.00994	-1.01067	0.518429
ENSG00000115419	O94925	2744	GLS	-0.758026	-1.50831	-0.52938	0.894375	1.50221	0.440874	-0.634746	-1.31193	-1.02903	1.2585	1.28497	0.593433	-0.663704	-1.17515	-0.529959	1.43847	0.884204	1.12864	-0.802317	-1.08706	-0.964171	0.529694	0.672797	0.365624	-1.31357	-0.283575	-1.47787	0.890799	0.00158513	1.42537	-1.12152	-1.74338	-1.8071	0.817615	0.876668	0.814743	-0.171125	-0.350673	0.0589275	1.09804	0.0169859	1.78229	-0.979087	-0.31243	0.20845	0.597039
ENSG00000249115	O94927	23354	HAUS5	1.2963	0.340826	0.854123	-1.09159	-0.589463	-1.02392	0.562765	0.799172	1.38343	-1.40374	-0.878133	-1.36412	1.00705	0.608231	1.34635	-0.965883	-0.319369	-1.06045	0.943084	0.865242	1.10338	-0.715364	-0.495544	-1.20238	0.886141	0.471433	0.788694	-1.42469	-0.445229	-0.831769	0.445228	0.459721	1.32735	-1.00833	-2.27012	-1.62871	1.09316	1.53868	0.564024	-0.828703	-0.355259	-0.61044	0.968139	0.827055	0.750522	-0.120847
ENSG00000149639	O94964	140710	SOGA1	-0.806192	-1.66983	-1.20046	-0.0652008	1.23667	0.463174	-0.311399	-0.746773	0.175186	-0.762186	-0.930552	-0.344367	0.613809	-0.0023928	1.27972	-0.503434	-0.786084	0.0186896	2.12486	1.53015	1.924	-0.168557	-0.731561	-0.337278	-1.95086	-2.22359	-2.23501	0.412558	0.850036	0.140443	-0.944847	-0.576457	-0.826697	0.0822293	-0.142438	-0.25422	0.724	0.00258564	0.26044	0.792142	0.432805	0.447579	0.488886	0.699119	0.451597	1.0211
ENSG00000085433	O94967	22911	WDR47	-1.64535	-1.47665	-1.56276	0.180878	0.219556	0.177772	-1.02818	-1.2533	-1.02404	0.799474	0.887653	0.700437	-0.694781	-0.501578	-0.416393	1.2769	1.21207	1.10567	-0.115829	-0.0688631	-0.449929	1.28705	1.19665	1.19354	-1.85265	-2.15474	-2.23351	0.234737	-0.431069	0.0705034	-1.0851	-0.366943	-0.747169	0.664313	0.777594	0.802097	0.219136	-0.0993529	0.0352247	1.04103	1.0589	0.880752	0.0964278	0.102896	-0.0157448	1.07484
ENSG00000183020	O94973	161	AP2A2	-0.348103	0.481493	-1.27057	-0.309362	1.79992	0.911394	-1.9596	-0.612121	-1.67516	0.413881	0.976103	0.417737	-1.28078	-1.10127	-0.0797319	0.416137	0.227224	0.446379	0.140064	-1.01219	0.49647	1.77327	0.284123	0.864678	-1.61612	-1.26643	-1.31726	0.959263	1.19989	1.64072	-0.659627	-0.889144	-0.305779	1.62601	0.845176	1.55676	-0.416809	-0.257902	0.369402	-0.344625	0.314012	0.215191	-1.62607	-0.638739	0.777595	-0.606536
ENSG00000138640	O94988	10144	FAM13A	-0.613446	-0.878476	-0.842494	-1.36583	-0.726375	-1.13395	-0.518322	-0.230764	0.00975544	-1.0116	-1.1129	-0.801945	-0.227219	0.388382	0.237713	0.390408	0.728863	0.880345	0.23637	0.402216	0.126719	2.13634	2.04479	1.88142	-0.728017	-0.455957	-0.629021	-1.47104	-1.22468	-1.66715	-0.337091	0.281726	-0.333544	-1.01956	-0.617061	-1.05006	0.126319	0.186862	0.131306	1.42948	1.30473	1.21859	-0.149529	0.12849	0.231985	1.46569
ENSG00000186834	O94992	10614	HEXIM1	0.261727	0.651666	-0.439483	-0.0888389	-0.185369	-0.641123	-0.537502	0.441973	-1.18395	-0.119891	1.12107	0.353452	0.102056	-1.02361	-0.762961	0.953135	2.77855	1.14871	-1.06826	-1.5246	-1.17283	1.41763	-0.347822	-0.133732	1.67847	2.13754	-0.327365	-1.04049	-1.11207	-0.452831	-0.838399	-0.301674	-0.189169	-1.85839	-1.51432	-1.46823	1.02906	0.8628	0.323043	0.628443	0.893011	0.325265	0.147155	-0.0847629	-0.195157	0.837379
ENSG00000176490	O95057	148252	DIRAS1	-1.06465	-1.64974	-1.02395	0.292606	0.580827	0.0626618	-1.15029	-1.69801	-0.776051	0.627118	0.814577	1.20167	-0.62757	-0.56687	-0.539821	1.61861	0.656653	1.59698	-0.1993	-0.535382	-0.564278	1.35787	0.844219	0.742113	-1.5425	-1.66985	-1.7104	0.575537	0.400727	0.465909	-0.729819	-0.723385	-0.956464	1.36201	1.21	0.977381	-0.554706	-0.969252	0.0594714	0.924328	0.494095	1.20062	-1.04333	-0.638758	0.140654	0.618157
ENSG00000104517	O95071	51366	UBR5	1.99518	1.15114	0.328038	-0.269895	-1.03153	-0.721912	0.785899	1.90846	0.288523	-1.19022	-1.11083	-0.587389	0.906816	0.603252	0.931161	-0.804983	-0.732368	-0.51389	0.828826	-0.0631186	0.601392	-0.694741	-1.57998	-1.02782	-1.20095	-1.07444	-1.47776	-0.607929	-0.0919332	-0.801464	-0.957508	-0.926277	-0.480978	-0.727452	-0.964723	-0.883241	0.798545	-0.0725107	1.34542	1.13539	1.40526	0.94923	-0.31052	0.2116	0.905613	0.914129
ENSG00000156304	O95104	57466	SCAF4	0.657948	0.0465151	-0.677129	-0.451468	0.340067	-0.476212	1.65362	0.662834	-1.57322	0.0643812	-1.86829	-1.4596	-0.0896393	-0.847825	0.450692	0.277481	0.190772	1.08829	-0.287224	-0.543899	-1.04268	2.29559	0.62011	0.968907	0.847667	0.310372	0.82903	-1.20539	-0.179457	-0.256633	0.698106	0.24897	0.759737	-2.7078	-2.44853	-1.42715	1.13104	0.403729	0.263436	0.293187	0.237363	-0.119286	0.148353	0.623192	0.517077	0.66565
ENSG00000165264	O95139	4712	NDUFB6	-0.230258	-0.785703	-0.420884	0.321627	0.135052	-0.0846481	0.219825	0.11851	-0.585334	2.64378	1.70929	1.18737	-0.404564	-1.60006	-0.728281	1.23636	0.656232	0.73787	-0.955897	-1.39919	-0.953372	0.32228	-0.516948	-0.623053	-0.107875	-0.441968	-1.11729	1.01547	-0.214335	0.444512	-0.943456	-0.391075	0.40284	1.69323	1.94557	1.62059	-2.21947	-0.368284	-0.812719	0.0815685	1.11334	0.651314	-0.113524	-0.144702	-1.49667	-0.202825
ENSG00000116688	O95140	9927	MFN2	-1.11318	-1.01277	-1.37962	1.23422	1.42927	2.05307	0.0995367	-0.294739	0.86144	1.35774	-0.298358	0.188204	-1.21862	-1.43139	-0.664996	0.958953	0.0297723	0.147695	-1.18095	-0.865691	-0.443441	0.471842	0.229858	0.842144	-1.44336	-1.91474	-1.35186	0.66433	1.41954	0.590461	-1.36139	-0.939991	-1.2801	0.600506	-0.780426	0.599916	1.40745	-0.622088	-0.0785738	0.984882	-0.0424867	0.782291	0.501951	-0.459707	0.162981	1.18454
ENSG00000130939	O95155	10277	UBE4B	0.397174	1.55199	2.24912	0.174057	0.594262	0.292569	0.0994607	0.0916033	0.519456	0.0884913	0.120635	-0.86983	0.125896	0.271657	0.353279	-1.02639	-0.880992	-1.12126	0.221198	0.949801	0.841591	-1.35545	-1.49836	-2.18997	-0.746902	0.306414	-0.584909	1.33911	1.61766	1.67795	0.216231	-0.222249	0.242637	-0.481407	0.881799	0.149841	0.445369	0.668276	-0.45061	-0.452659	-0.0175536	-0.798055	0.594645	-0.0937166	-0.238208	-2.61973
ENSG00000070061	O95163	8518	ELP1	1.60593	2.53498	1.87746	-0.730967	-0.995657	-1.28765	0.504282	0.85955	-0.509317	-0.682749	-0.219963	-1.55652	0.976524	-0.535938	0.026534	-0.541642	0.286312	-0.305292	0.292678	0.149993	0.0251098	-0.225514	-0.654972	-0.893175	-0.614116	-1.41081	-1.11667	1.41602	1.71817	1.22693	-1.28399	-1.11766	-0.230485	0.772971	0.730765	0.96066	-0.789377	-1.23906	-0.791227	0.575522	0.526614	0.480747	-1.29837	-0.165107	-0.658907	0.271309
ENSG00000166136	O95169	4714	NDUFB8	-0.954134	-1.01324	0.31926	0.0477861	0.0955292	-1.18092	0.0672084	0.533125	-0.340133	1.5913	2.09388	1.98487	-0.881778	-1.39928	-0.34398	1.34783	0.175382	1.02001	-0.657589	-0.614243	-0.892392	0.268206	-0.44309	-0.823609	0.811968	-0.832502	-0.871164	1.62475	0.130179	1.07324	-0.199465	0.0597189	0.0533765	1.31105	0.934683	1.37594	-2.39051	-0.271989	-1.72196	-0.382582	0.582198	0.137869	-0.386567	-0.826134	-1.19069	0.957283
ENSG00000267855	O95182	4701	NDUFA7	-1.24353	-0.817013	-1.3691	1.07093	0.461142	0.473304	0.458331	-0.00138926	-0.208313	2.05619	1.53678	1.43199	-0.628407	-1.15326	-0.73072	1.73525	0.13873	0.463206	-1.08059	-0.713919	-0.941017	-0.429099	-0.0904894	-0.419006	0.352627	-0.000633213	0.340299	-0.134693	0.555444	-0.532057	1.07518	1.47402	0.679203	-0.976665	-0.526973	-0.0864745	0.0878319	1.81178	0.429189	-1.69534	-0.47647	-1.76455	0.809765	1.20839	0.369008	0.147926
ENSG00000133318	O95197	10313	RTN3	-1.44117	-0.96408	-1.05208	0.633569	0.118457	0.85496	-1.01586	-0.987313	-0.483729	1.27375	0.910826	0.781576	-0.983047	-0.630039	-1.02801	1.46472	1.11839	0.832318	-0.76695	-0.539801	-1.04034	1.81902	0.452456	0.672383	-1.68055	-2.03488	-1.45607	1.28516	1.03506	1.18531	-0.784766	-0.259032	-1.06126	1.12203	1.18984	1.29982	-0.197808	-0.500792	-0.018475	0.863552	0.582791	0.815631	-0.928761	-0.378892	-0.252576	-0.42153
ENSG00000168924	O95202	3954	LETM1	-0.76023	-0.242938	-0.290162	-0.173951	0.10316	-0.124528	-0.456538	-0.0682218	-0.625815	0.728979	0.872611	0.507024	-1.22254	-1.21913	-1.026	1.77468	1.54127	1.21696	-1.24313	-1.12791	-1.37948	1.79328	0.911233	0.511356	-1.69021	-1.75245	-1.4889	0.60208	0.539844	0.0360508	-0.754268	-0.87599	-0.0932364	-0.0976181	0.43746	1.07806	-0.587562	-0.993275	-0.327623	1.49129	0.760257	1.12612	-0.516432	-0.720883	-0.0388633	1.48611
ENSG00000114520	O95219	8723	SNX4	-1.18969	-0.630047	-1.57418	-0.152639	1.23577	0.95191	-1.4655	-1.22976	-1.44699	-0.174125	0.463417	-0.109436	-0.342233	-1.18086	-0.187315	1.21559	1.16667	1.02403	-0.114869	0.0428153	-0.0603146	1.33916	1.02037	1.39821	-1.40183	-0.904345	-1.97359	1.10405	1.0312	1.10247	-1.15048	-0.855403	-1.52224	1.05597	1.46126	1.26214	-0.652387	-0.853786	-0.313469	0.612357	0.673446	0.508609	-0.35131	-0.252695	-0.266133	0.587979
ENSG00000112984	O95235	10112	KIF20A	1.50342	0.9562	0.898473	-1.34296	-1.24356	-0.530733	0.0333603	1.40981	1.06366	-1.07434	-1.00313	-0.702441	1.15754	0.346915	0.790409	-1.19311	-0.774997	-0.539285	1.11717	0.86474	0.89307	-1.13702	-0.822563	-0.670625	1.08945	1.33977	1.05619	-0.404178	-1.26463	-0.616111	0.901968	0.778506	0.982632	-0.818666	-1.17115	-0.690017	0.753183	1.21755	0.475398	-1.26463	-0.863675	-1.06176	1.11876	1.21399	0.266559	-0.618364
ENSG00000090889	O95239	24137	KIF4A	1.04542	0.861481	1.23834	-0.799351	-1.15996	-0.785095	0.641749	0.793259	0.836812	-1.11982	-1.00217	-0.657594	0.893479	0.776052	0.983722	-1.10951	-0.928198	-0.931677	1.1211	1.36442	1.00099	-1.09605	-0.904589	-1.0628	1.21735	1.25526	1.19254	-0.580721	-1.14189	-0.598133	0.974513	0.80555	1.04199	-0.923809	-1.10831	-0.701612	0.635623	1.08985	0.450943	-1.14766	-0.883774	-1.08157	1.17161	1.19354	0.284393	-1.08157
ENSG00000136504	O95251	11143	KAT7	1.13422	-1.35316	-0.113662	0.0822224	1.42193	-0.277057	1.28491	0.0107707	1.27902	-0.205114	-1.25071	-1.2019	1.00704	0.0216192	0.935754	-1.40048	-0.186151	-1.73402	0.995058	1.0165	0.825944	-0.926617	-0.549147	-0.816979	-0.229594	0.331883	0.197992	-0.639575	-0.309774	-0.328128	-0.108012	-0.205451	0.077327	-1.15583	-1.34736	-1.34736	1.17172	0.465803	0.666073	-0.192042	-0.439114	-0.692241	2.55457	2.43201	0.913284	-0.603084
ENSG00000102078	O95258	9016	SLC25A14	-1.12774	-0.890031	-0.783302	0.0308454	1.62745	1.88903	-1.14405	-1.01481	-0.321434	0.617785	1.35609	1.04499	-1.31804	-1.36613	-0.806859	0.695397	1.0222	0.83062	-0.447909	-0.522314	-0.788691	0.259002	0.727258	0.430639	-0.518799	-1.86811	-0.770573	1.34436	1.91825	1.51497	-1.44296	-0.525185	-0.955183	0.335574	1.18682	1.0792	-0.562026	-1.01093	-0.341642	0.405671	0.542617	0.432994	-1.01849	-0.991094	-0.213015	0.620938
ENSG00000172575	O95267	10125	RASGRP1	-0.341248	-0.832076	0.192996	-2.34208	-0.65875	0.242206	-1.35377	0.243934	0.39685	-1.58359	-0.949322	0.0123518	0.0736384	1.69641	0.852114	-0.96948	-0.116584	0.149929	1.65927	0.249091	0.666743	1.4316	0.596439	0.683314	-0.142217	0.00466252	0.216738	-1.23696	-1.09871	-1.50632	0.146448	0.44389	0.269436	-1.97328	-1.38266	-1.93091	1.38077	1.08142	0.837284	0.121329	0.426672	-0.0806384	0.276658	0.506585	0.674855	0.97276
ENSG00000124164	O95292	9217	VAPB	-0.986261	-0.53902	-1.37536	1.35704	1.28252	1.16299	-0.66362	-0.941858	-0.393036	1.33351	1.02739	0.724717	-0.83351	-1.08255	-0.905604	1.44477	0.834966	0.241204	-1.4066	-0.944635	-0.948277	0.522693	0.548578	0.539945	-1.79879	-0.302865	-0.0569217	1.36163	1.65938	1.7458	-0.631332	-0.0908137	-0.447542	0.248431	0.708327	-0.12306	-0.962395	0.145095	-2.05509	1.58637	-0.462536	-1.0126	0.217575	0.120782	-1.06922	0.110339
ENSG00000151366	O95298	4718	NDUFC2	-1.80054	-0.951615	-0.893314	0.710583	0.446806	0.575559	0.568945	0.0340873	0.223221	1.97612	1.53936	1.59252	-1.09692	-1.23401	-0.604474	1.41407	0.0949991	0.537477	-1.1245	-0.460699	-0.661927	-0.698627	0.0154648	-0.202581	-0.449061	-0.864131	-0.905908	0.61207	-1.08686	0.473061	0.779876	0.460146	0.584686	0.434602	0.754513	0.97402	-1.26814	0.571124	-2.05157	0.517439	1.71578	0.65331	-1.4311	-1.1001	-1.34586	1.06645
ENSG00000130414	O95299	4705	NDUFA10	-1.23843	-0.962611	-0.253156	1.18742	0.519987	0.000430866	0.507794	-0.0923149	-0.48355	2.22836	1.70521	1.26396	-0.639138	-1.43459	-0.676186	1.46722	-0.0125071	0.477996	-1.46041	-0.0179199	-0.890561	-0.310134	-0.216169	-0.670691	-0.409006	-0.369566	0.277013	1.60601	2.5932	1.15402	-0.632725	0.286345	0.0948576	1.04702	-0.29305	1.14991	-0.687125	-0.86305	0.670215	-1.16825	-0.983509	-0.337156	-0.243348	-0.808158	0.251284	-0.715835
ENSG00000122642	O95302	11328	FKBP9	0.650054	0.00315437	0.445023	-0.47724	-2.10952	-1.14534	1.15524	1.75818	1.13125	-0.790495	-1.4885	-0.667299	0.458642	1.60609	0.852697	-0.678135	-1.11544	-0.415572	0.583689	0.697972	0.44834	-0.981911	0.105076	-0.0259544	0.439975	1.00716	0.684956	-1.77901	-1.00999	-1.75043	1.23863	1.47577	1.09598	-1.50522	-0.947272	-1.36287	0.892882	1.23863	0.344769	-0.239054	0.443346	-0.838722	0.480933	0.546453	-0.249915	0.0273786
ENSG00000048740	O95319	10659	CELF2	-0.633232	-0.975065	-0.858028	0.647839	0.952892	1.44342	-1.14573	-0.94627	-0.407409	0.998895	1.35848	1.08086	-1.04719	-0.876176	-0.611406	1.61193	0.910077	1.0599	-1.03941	-1.28957	-1.06633	0.640806	0.00058953	0.190122	-1.53546	-1.87005	-1.6144	1.56015	-0.00967461	0.573912	-0.941261	-0.616941	-1.05284	1.25259	1.12871	1.375	-0.024896	-0.342581	-0.267652	1.15631	0.726995	0.741125	-0.834526	-0.682898	-0.278649	0.557896
ENSG00000136824	O95347	10592	SMC2	1.07499	0.810529	1.14475	-0.928832	-1.12183	-0.857305	0.852304	0.820266	0.7622	-1.10682	-1.0057	-0.918	1.02592	0.792322	0.901009	-1.06599	-0.867646	-0.810605	1.27789	1.22143	0.941094	-0.932205	-0.895651	-1.11413	1.28814	0.987476	1.2046	-0.801079	-0.58865	-0.306049	0.981002	0.893305	1.02502	-1.25507	-1.45283	-0.981082	0.674607	1.10265	0.264983	-1.03813	-1.06522	-0.996306	1.24916	1.30419	0.00743471	-0.624985
ENSG00000138162	O95359	10579	TACC2	-1.35443	-0.0796194	-1.04153	1.1023	1.2097	1.32957	-0.801447	-1.76095	-1.49492	1.24358	0.66209	0.687027	-0.409984	-1.03472	-0.629172	0.592356	0.401311	0.604731	-0.707274	-0.662491	-0.815224	1.22842	0.677345	1.05333	-0.981791	-1.34276	-1.45783	0.625159	1.2078	0.708848	-1.31961	-1.18947	-1.44191	0.344592	0.0461297	-0.0569442	-0.690586	-0.680151	-0.332483	0.85526	1.19658	0.983086	-0.229627	-0.379856	-0.10717	1.36381
ENSG00000011009	O95372	11313	LYPLA2	-0.988724	0.847987	-0.0662048	0.754829	1.7031	1.47016	-0.302719	-0.0631847	-0.0405847	0.797346	1.20358	1.53776	-1.35249	-0.648136	-0.591229	0.622678	0.745129	0.456873	-1.41806	-1.07296	-1.00066	-1.66598	-0.478253	-0.45025	0.397379	-1.21378	0.267303	0.999233	1.41347	0.855778	0.908879	0.0296666	0.713092	1.46372	1.23615	0.885155	-1.50688	-0.989241	-0.700307	-0.539865	0.768593	0.521439	-1.8237	-1.23153	-0.145304	-0.782945
ENSG00000177479	O95376	10425	ARIH2	1.4973	1.57239	1.4261	-1.37411	0.0806992	-2.26461	0.0793228	1.22559	-1.44893	-0.736636	0.0536814	-0.85995	0.454856	-0.423454	-0.194419	0.614662	0.905352	0.215392	0.714154	-0.183247	-0.213962	0.666696	-0.873078	-0.933812	-1.0758	-0.267115	-1.11902	0.261842	-0.0883853	0.319131	-0.870451	-1.5381	-1.2804	-1.15415	-0.369149	-0.765513	0.986539	-0.593661	1.72626	1.03346	0.821641	1.41509	0.496953	-1.35617	1.1652	0.86373
ENSG00000164609	O95391	10569	SLU7	0.552757	0.0376638	1.02611	-0.21119	-0.461492	-1.30766	1.44945	-0.00748691	0.0728483	-0.982142	-2.00327	-2.32427	0.395831	1.05567	0.394484	-0.942977	-0.339531	-0.689845	0.475598	1.43793	1.17526	0.675478	0.181898	0.33887	-1.31967	-0.0216524	-0.110253	-1.78288	-0.0557661	-0.84581	-0.950189	-0.152232	-0.434666	-0.286259	-1.23531	-1.67481	1.18163	-0.737821	0.632706	0.482308	-0.295221	0.712401	0.941312	0.671783	1.36439	1.78129
ENSG00000013375	O95394	5238	PGM3	0.195092	0.529836	1.20554	-1.03716	-1.24269	-0.667736	1.10716	1.4849	0.32442	-1.07973	-1.15531	-1.2297	1.08993	1.44401	0.876084	-0.979946	-1.01389	-0.538152	0.984174	0.886573	0.975208	-0.870889	-0.615243	-0.672488	0.37179	-0.208768	0.416853	-1.00111	-0.775931	-0.545226	-0.153275	1.02836	0.312451	-0.886589	-1.41487	-1.04178	1.46354	0.50017	2.47672	-0.0765351	-0.499147	-0.708282	-0.120569	0.0683444	2.29993	-0.0505188
ENSG00000169217	O95400	10421	CD2BP2	0.36462	-1.12465	-0.104887	-0.897443	-1.03802	-1.20533	0.593227	0.702158	1.49021	-1.8503	-1.75282	-0.896368	0.197954	1.18976	1.31486	0.716625	-0.179841	-0.663672	1.10287	0.954598	1.23735	-0.0194724	0.0968434	-0.228252	-1.58297	-1.85348	-1.51704	-0.94088	-0.273388	-1.07008	-0.555255	-0.733638	0.415279	-0.00637465	-0.642431	-0.656504	-0.0418417	0.181425	0.502176	1.40486	0.79151	1.1438	1.1032	-0.241365	1.3258	1.08636
ENSG00000157077	O95405	9372	ZFYVE9	0.207909	0.103074	-0.166523	-0.372815	-0.42396	0.998987	-1.20803	-0.262619	-0.0865117	0.0133984	1.08657	-0.672901	-0.261952	-1.80943	-0.398175	1.34784	1.38039	0.475432	-0.650435	-1.94689	-0.855327	2.28729	0.422261	0.792407	-1.00782	-0.468766	-0.687387	0.671745	0.678797	0.222734	-1.77789	-1.38547	-1.65119	0.68985	0.782041	0.704872	-0.0391864	-1.516	-0.000471851	1.47475	0.33015	1.13884	-0.671552	-1.01725	0.327943	0.937468
ENSG00000164713	O95415	25798	BRI3	-2.34049	0.512423	-1.67029	0.201175	-0.443903	0.579212	-1.07864	0.188717	-1.09374	0.416474	0.666778	0.926124	-1.14891	-0.429193	0.0210352	0.84049	1.82955	1.58882	-0.411623	-0.404211	-0.367616	0.502062	0.00998432	1.10578	-2.26701	-0.539977	-2.11113	0.367833	-0.341385	1.07254	-0.178215	-0.395237	-1.42963	1.012	1.05133	0.756871	-0.0790673	-0.0498435	-0.166436	0.818598	1.28739	1.19952	-0.671972	-0.980551	0.147243	0.196311
ENSG00000197321	O95425	6840	SVIL	1.41808	0.786274	1.31916	0.103473	-0.271175	-0.319511	1.51455	2.2009	1.14784	-1.03932	-1.44035	-1.17772	0.343206	0.521147	0.159794	-1.351	-0.962476	-0.374066	-0.463021	-0.749295	-1.03853	0.297052	-0.35008	-0.27492	0.666948	0.532048	2.43928	-0.722474	-0.674164	-0.86196	1.0019	0.878759	1.10292	-1.37863	-1.59291	-1.65232	0.729759	0.871776	0.919039	-0.32881	-0.29549	-0.781466	-1.00349	-0.381042	0.503153	0.00634425
ENSG00000197563	O95427	23556	PIGN	-0.960499	0.516672	1.83685	-0.791289	-0.738224	-1.11669	0.661723	0.655213	-0.261475	-0.144884	-0.75566	-0.91851	0.58039	0.832664	0.825537	-0.882742	-0.698058	-0.159274	0.420167	1.93955	0.960541	-2.30857	0.656221	-0.149656	-0.678656	-0.569296	-1.32569	0.670839	1.1253	0.615897	-1.88791	-1.89151	-0.86072	-1.19872	-0.910215	-0.649134	0.621587	0.295849	0.0285874	0.958957	0.611911	0.283761	0.327753	1.19332	-0.114031	1.09254
ENSG00000183527	O95456	8624	PSMG1	1.79061	2.45115	1.84573	-0.535096	-0.607883	-0.48724	0.615005	1.46935	0.244843	-0.810111	-0.803826	-0.896477	0.658566	-0.142936	0.0615935	-0.730167	-0.806894	-0.755847	0.0709602	0.0205858	0.00281531	-0.535013	-1.18357	-0.936147	1.5564	1.56883	1.54624	0.0944638	0.645511	-0.318736	1.13545	0.742223	1.18092	-1.35717	-0.918548	-0.934948	0.176637	0.694971	0.281903	-0.915287	-0.999866	-0.905539	0.342221	0.229511	-0.370251	-1.02746
ENSG00000184922	O95466	752	FMNL1	-0.284746	-0.524	-1.06551	0.00849694	0.730446	0.66492	-0.891777	-1.08269	-1.21173	0.644996	1.25275	0.633174	-0.918506	-0.630378	-0.96305	0.609066	1.30087	0.825835	-0.389179	-1.26071	-1.53058	1.04651	1.59141	1.44437	-0.941384	-1.1506	-0.51397	0.589659	0.490725	0.607802	-1.19102	-0.600097	-0.966624	0.766967	1.16121	0.720614	-1.04074	-0.887924	-0.460799	1.40441	1.49517	0.940674	-1.53331	-1.13246	-0.707859	0.632793
ENSG00000166224	O95470	8879	SGPL1	0.54172	-0.0938546	0.0660646	-0.280416	-0.844906	-0.593982	1.21991	1.00499	2.04446	0.229255	0.138249	-1.05143	0.364269	0.997877	0.350293	-1.44397	-1.54723	-1.48074	0.794117	1.4908	0.74709	-0.966386	-0.801769	-0.884403	-0.712536	-0.00621303	0.508142	-1.1466	-0.519883	-1.34965	-0.393441	0.292955	-0.05535	0.549342	-0.477834	-0.0765443	2.24492	0.0747158	2.42126	-0.61276	-1.16384	-0.598469	0.388072	0.844367	1.6679	-1.01624
ENSG00000049239	O95479	9563	H6PD	1.10406	0.522746	0.760362	-0.881402	-1.4183	-1.10773	0.778704	0.809417	0.498344	-0.882947	-1.12364	-0.94977	0.885552	1.07452	1.31873	-1.3111	-1.52922	-0.492389	0.469085	1.24071	1.17906	-1.05553	0.38121	-0.270462	0.817156	0.706544	1.55389	-1.59562	-1.27144	-2.12268	0.603758	0.688878	0.662216	-0.709506	-0.469168	-0.530868	0.951298	0.819291	0.702135	-0.984756	-1.08142	-0.967139	0.988137	0.982024	1.01653	-0.0320565
ENSG00000221890	O95502	23467	NPTXR	-2.10177	-1.40161	-1.35968	0.51907	0.693209	1.65512	-0.479287	-1.50162	0.612143	1.44444	-0.108177	0.668025	-1.09072	-0.0888438	0.164328	-0.28115	-0.0452431	-0.1995	-0.169133	0.798695	0.972633	-0.782723	0.777531	1.30426	-1.63226	-2.03566	-1.3688	1.00788	0.425015	1.12721	-0.9009	-0.599216	-0.686505	0.529909	0.361908	0.903994	-0.577208	-1.31423	-0.679101	0.924014	0.398096	0.872349	-0.200797	-0.130993	-0.136733	1.31616
ENSG00000183741	O95503	23466	CBX6	-0.466499	-2.41264	-1.33032	0.824519	1.70654	1.54419	0.159387	-1.24271	1.50343	0.0294602	-0.898021	0.659122	-0.617452	0.254002	0.309884	-0.0494882	-0.528678	0.172078	-0.0154139	0.512374	0.891554	-1.4586	0.193846	0.259444	0.297519	0.491138	1.7314	1.11049	0.257631	0.413857	1.09762	0.605066	1.67237	0.212409	0.220812	0.505509	-0.474482	-0.0581645	0.0572028	-0.700025	-1.04819	-1.06725	0.262633	-0.344576	-0.850923	-0.199509
ENSG00000143158	O95563	25874	MPC2	-1.31731	-1.22107	-0.708523	-0.120775	0.104587	-0.368818	-0.0862549	-0.25022	-1.0717	2.86091	1.71954	0.946766	-1.07364	-0.804886	-0.634837	1.20317	0.503882	0.636102	-0.401553	0.244835	-0.947448	0.296337	0.574592	-0.0837047	-0.336715	-1.07258	-0.721607	1.4737	0.553522	0.834188	0.022921	0.222777	-1.30166	1.63727	1.73695	1.46852	-1.53259	-0.546323	-1.72106	-0.418768	0.672534	0.832348	-0.406102	-0.23231	-1.11251	-0.131497
ENSG00000123983	O95573	2181	ACSL3	-1.01551	-1.71392	-1.30887	0.823136	-0.13761	1.02671	-0.683398	-0.00275142	-0.150252	1.3845	1.65547	1.02334	-0.618474	-1.74578	-0.0377788	1.39352	1.33915	0.92941	-0.25861	-0.603207	0.124766	-0.70471	-0.625081	-0.0940381	0.281281	-0.447863	-1.0389	1.42516	0.449664	2.41647	0.78804	-0.250071	-0.10287	-0.649023	-0.764051	1.05549	-1.45503	0.144133	-1.14679	1.22913	1.08998	-0.18355	0.347567	0.156822	-1.09287	0.060233
ENSG00000124356	O95630	10617	STAMBP	0.104362	0.813654	-1.35872	-1.06462	-0.556957	-0.79575	0.387692	1.03189	-0.00838487	-1.54295	-1.80035	-1.33698	1.12275	1.26609	0.970303	-0.581943	-0.655172	-0.509035	0.884475	0.630695	1.48925	1.21758	0.0358837	0.256248	-1.48379	-1.78339	-1.67231	0.526511	1.79739	1.20392	-0.270499	0.168456	-0.453591	-1.3776	-1.24723	-0.615796	-0.2016	0.910719	0.84735	-0.321404	1.41604	0.568025	0.796002	0.591941	0.647049	0.0916416
ENSG00000160917	O95639	10898	CPSF4	1.61897	1.83058	-0.669608	0.301055	0.582019	0.684406	-0.219564	1.98261	0.299258	-1.27621	-0.552698	-1.07992	0.272728	0.08056	-0.0955877	-1.53983	-0.831536	-1.67131	-1.05679	0.355924	0.921587	0.311887	-0.540236	0.291694	-1.19272	-1.63256	-1.06677	-0.459824	1.31401	0.392392	-0.848629	-1.44518	-1.23065	0.109619	0.205957	0.220739	-0.345463	-0.470328	0.221099	0.753972	0.946592	1.54127	-0.824294	-0.681269	0.785035	0.7515
ENSG00000213760	O95670	534	ATP6V1G2	-0.787702	-1.42194	-1.56707	0.472116	0.485096	0.447091	-0.980628	-1.23855	-1.35573	0.686897	0.962109	1.13108	-0.659362	-0.377359	-0.673736	1.30088	1.10915	1.24767	-0.491307	-0.671159	-0.778547	1.23877	0.81434	1.10789	-1.36731	-1.05359	-1.50975	0.808549	1.23342	1.08256	-1.25633	-1.02802	-1.11068	0.745594	0.767035	0.672217	-0.534901	-0.802448	-0.577534	0.860408	1.1117	1.02579	-0.844949	-0.519228	-0.723938	1.02912
ENSG00000101290	O95674	8760	CDS2	0.619949	1.5263	1.27376	0.687605	0.653679	-0.61032	0.0163038	1.16851	-1.33014	0.571485	1.55648	-0.302202	-0.0870484	-0.839535	-1.1954	0.468705	0.652987	0.142954	-0.911152	-1.29711	-1.84368	0.929059	-0.681526	-1.16967	-0.241874	0.168611	-0.0655172	1.75962	1.9241	1.50754	-0.50095	-0.356735	-0.236793	1.36038	1.24871	1.36205	0.0691961	-1.3602	-1.17534	0.216233	-0.629681	-0.24569	-0.736772	-1.15265	-1.20963	-0.464379
ENSG00000105514	O95716	9545	RAB3D	-1.30771	1.03978	-1.1463	0.827859	1.65351	0.902322	-0.370473	0.59197	-1.61538	1.05762	0.686117	0.0887916	-1.07923	-0.357071	-1.04996	0.787933	0.0485189	0.755253	-0.811763	-0.928732	-1.5698	1.12004	-0.335938	1.01263	-1.81612	-1.48761	-1.80425	0.49002	0.0244781	0.376338	-0.189985	0.247394	0.128531	1.80176	1.55338	2.27874	0.146962	-0.659988	-0.510841	0.266808	0.984214	-0.0882203	-0.698318	-0.296787	-0.268355	0.108312
ENSG00000099940	O95721	9342	SNAP29	-1.28662	-1.72766	-0.941072	0.329603	0.404497	-0.58793	0.595943	-1.09474	-0.86215	0.367542	-1.08215	-0.997105	0.639506	0.467628	1.22333	0.112096	-1.16899	0.274444	1.70596	1.88	1.03729	-0.571884	0.713128	0.569324	-1.83137	-1.6471	-0.895594	0.99513	0.515843	-1.31797	-0.501385	-0.246258	-0.131656	-0.652438	-0.728025	-0.0250326	0.437513	-0.0752709	0.647137	-0.154379	-0.804707	-0.19438	0.67885	2.66539	0.64469	0.985958
ENSG00000100884	O95741	9362	CPNE6	-0.348307	-0.759969	-1.05971	0.630206	-0.28963	0.222458	-0.344093	-0.883306	-0.659127	1.29914	2.02072	2.91244	-0.395519	-0.649779	-0.621255	1.0237	0.336748	0.355827	-0.137212	-0.624303	-1.50635	-0.0195272	-0.295514	-0.207651	0.175918	-0.856476	-0.856476	1.82238	-0.0772452	0.749894	-0.856476	-0.818055	-0.818055	1.95175	1.77425	1.64581	-0.856476	-0.856476	-0.856476	0.779044	0.592896	0.595391	-0.687083	-0.856476	-0.7396	-0.173663
ENSG00000172939	O95747	9943	OXSR1	0.882406	1.88603	1.14598	-0.396602	-0.35186	0.0421853	-1.26341	0.358294	-0.523472	-0.562146	0.468503	-0.614301	-0.506806	-1.33724	-0.774453	-0.119919	1.46678	0.911802	-1.2689	-1.42693	-0.80468	1.86924	0.0698432	0.849661	-0.0810468	0.149467	-0.0537626	0.272492	-0.891591	-0.0160197	-1.75678	-1.36495	0.291365	-0.476187	-1.06459	-0.371645	1.0349	-0.530573	0.159791	0.679265	1.61923	1.11127	-1.74372	-0.231228	-0.858098	1.19601
ENSG00000152904	O95749	9453	GGPS1	-0.881419	1.00098	-1.05066	0.510675	1.51487	0.753987	-0.398664	-0.627136	-1.4478	1.01362	0.618232	0.569598	-0.486657	-1.14525	-0.55185	1.36627	0.905092	0.52414	-1.58747	-1.65949	-0.993034	0.828585	0.385667	0.837724	-1.00978	-1.38014	0.266689	1.7314	1.12481	0.0287587	-1.29894	-1.251	-0.154235	0.576673	0.0379438	0.993868	-0.433422	-1.59148	0.196575	1.44086	0.188736	0.373155	0.325081	-1.27916	-1.45658	1.06456
ENSG00000164070	O95757	22824	HSPA4L	0.64174	0.050504	0.455487	-1.1659	-0.73755	-0.795437	1.47373	1.97801	0.963839	-0.989123	-0.700747	-1.1545	1.1215	1.8206	1.12994	-0.648028	-0.453611	-0.76763	0.117361	-0.24131	0.586949	-0.89968	-1.15888	-0.627257	0.646334	1.57689	0.739328	-0.282355	0.106657	-0.811348	0.886611	0.618031	1.26765	-1.16001	-1.6235	-1.29576	1.14631	1.46146	1.60522	-0.811348	-0.835402	-0.324208	-0.347584	-0.0695691	0.219245	-0.745925
ENSG00000119314	O95758	9991	PTBP3	0.616989	-1.01816	-0.532634	1.4659	1.07377	2.11728	-0.779599	-2.04602	0.712099	1.24117	-0.380012	1.01257	-0.0642899	0.0604524	-0.206464	-0.0914516	-0.899883	1.17125	-1.03144	-0.708602	-0.684645	-0.378132	-0.985955	0.335817	-1.23691	-1.23917	-0.814391	1.12639	1.93748	1.6298	-1.46995	-1.12811	-0.907837	1.11935	1.31975	0.817172	-0.773588	-0.588579	-0.699296	0.0640014	0.719469	0.282764	0.584685	0.388217	-0.110428	0.132645
ENSG00000196961	O95782	160	AP2A1	0.218304	0.611549	0.0766975	-0.336104	-0.393947	-0.852961	-1.78717	-0.152283	-2.05572	-0.505633	0.263735	-1.08603	0.420042	-0.894026	-0.48093	0.56105	0.28835	0.322889	0.711354	0.646348	0.085835	2.77258	1.51621	0.0498614	-1.14644	-0.974051	-0.485107	1.6653	1.5373	1.30736	0.051312	0.0388145	-0.561931	1.43778	1.40578	1.5559	-0.889534	-1.14259	-0.855801	-0.242428	0.344642	-0.0179224	-1.00956	-1.26757	-1.09142	0.186769
ENSG00000011451	O95785	58525	WIZ	1.33867	1.00139	1.25504	0.257721	-1.54058	-1.67545	1.54813	1.32444	0.851823	0.0505185	-0.689683	-1.55424	0.518524	0.29217	0.398094	-0.860323	-0.351235	-0.51349	0.461008	0.699144	0.209896	-1.30762	-0.700801	-1.01315	-1.39158	-1.01475	0.423883	0.847294	1.25159	1.22268	-0.698699	-0.358437	-0.262546	1.34733	-0.200994	0.83559	-1.43365	-2.15979	-0.751657	1.45786	0.559032	-0.305675	-0.371672	-0.624648	-0.0753648	0.999833
ENSG00000124214	O95793	6780	STAU1	-1.41308	1.19456	-0.105289	0.69211	0.224246	0.502205	-0.896094	-0.0434114	-1.71836	0.555542	1.03778	-0.142377	-0.489168	-1.21925	-0.291844	1.70355	1.94556	0.98437	-0.800371	-1.59205	-0.742576	0.412037	-0.242542	0.444462	-1.27894	-1.84533	-1.4411	0.582134	1.20698	0.691743	-0.930078	-1.14529	-0.975483	-0.353493	-0.489483	-0.350899	0.361075	-0.353493	0.106403	1.49216	0.860384	1.35039	0.192124	-0.733607	-0.386424	0.968794
ENSG00000112208	O95816	9532	BAG2	0.931264	0.647071	1.25161	-1.12132	1.25253	-1.28475	-0.995963	-0.641791	-0.557592	-0.469515	-1.23791	-1.53431	1.13038	0.0806658	0.336333	-1.41677	-0.932053	-0.206416	1.78148	0.933354	0.834219	-0.014731	0.740595	0.493617	0.878019	0.301979	-0.402838	-2.06288	-1.5753	-0.825268	-1.17568	-0.471212	-0.849631	-0.704915	0.767147	-0.972949	0.200362	0.0969963	0.767147	0.616059	2.44799	0.519662	1.40361	0.241216	-0.136872	0.932697
ENSG00000151929	O95817	9531	BAG3	1.63808	0.757785	0.317625	-2.45552	-1.15172	-2.02632	0.0836557	0.566994	-0.513962	-0.790367	-0.0423736	-0.972957	1.04127	1.37199	0.473093	-0.0602885	0.647496	0.0204373	-0.544128	0.264689	0.365566	1.13937	0.47961	-0.610023	0.739835	1.91673	0.443213	-2.24859	-1.94947	-0.905678	0.294112	0.646224	0.409768	-0.6836	-0.355796	-1.2006	1.1694	1.08562	0.967242	-0.444213	0.605451	-0.393165	0.452469	0.103189	0.855497	-0.242276
ENSG00000103150	O95822	23417	MLYCD	-0.871049	-0.682155	-1.1052	1.51251	0.589124	0.992576	-0.491499	-1.03262	0.304818	1.88911	1.1111	0.969882	-0.92126	-1.64207	-0.979997	1.01566	0.667448	0.452369	-1.3418	-0.938096	-0.663729	0.299843	0.52614	0.338889	-0.848361	-1.52927	-0.90701	2.33303	1.8086	0.940054	-0.98118	-0.87761	-0.747153	0.832436	0.711662	0.565552	-0.306076	-1.14783	-1.24083	0.622192	0.140243	-0.494865	-0.536146	0.201244	-0.508592	0.4853
ENSG00000205758	O95825	9946	CRYZL1	-1.24263	0.70366	-0.394198	-0.447947	-0.00903372	-0.59329	-0.141576	-0.307129	-1.18879	1.1025	1.82733	0.670811	-0.988601	0.258575	-0.463824	1.29155	1.46285	1.23301	-1.64137	-1.2377	-1.40753	0.360365	0.832452	0.320508	0.823511	-0.905776	-1.25044	0.820707	1.42537	1.03702	-0.454878	-0.753782	-1.19665	0.882072	0.992353	0.863549	-0.416002	-1.15413	-1.39185	-0.105186	1.08977	0.395928	-1.06479	-1.39115	-0.561733	1.10089
ENSG00000156709	O95831	9131	AIFM1	-1.08641	-0.169181	-0.390272	0.928911	0.184576	0.288249	-0.17514	-0.0358793	-0.47532	2.09288	1.82441	1.14067	-1.15455	-1.53597	-0.61671	1.1878	0.865942	0.84316	-1.47419	-1.08194	-0.936749	-0.379775	0.263878	-0.108405	0.577525	-0.0898246	0.202734	0.929536	-0.391057	-1.3	-0.108004	-0.259107	1.28318	0.60357	2.01243	1.32528	-0.535598	0.427291	1.49655	-0.498663	-0.186785	-0.396775	-1.7856	-2.0807	0.00922657	0.048411
ENSG00000106537	O95857	27075	TSPAN13	-0.597547	0.220331	-0.0623459	1.5522	1.00114	0.995146	-0.216063	-0.619135	-0.558653	0.64501	0.738092	0.321076	-1.05802	-0.617862	-0.456395	0.785407	0.824442	1.04142	-2.02281	-1.88839	-1.82659	0.980533	0.387771	0.431248	-0.3875	-0.946674	-0.610496	0.895235	0.6034	0.731705	-0.467381	-0.0264083	-0.394179	0.718065	0.828064	0.848028	-0.366105	-0.993832	-0.407656	1.12262	1.00644	1.09821	-2.29337	-2.27714	-0.844719	0.493648
ENSG00000134824	O95864	9415	FADS2	1.56398	1.12487	2.23197	0.255027	-0.0164768	0.420098	1.39689	0.405764	0.934502	0.0704605	0.246326	-0.426109	-0.0808057	0.0778515	0.0258183	-0.208932	-0.509842	-0.522319	-0.319875	-0.742589	-0.752864	-1.56172	-1.63854	-1.97349	1.21618	0.495516	1.45944	0.339869	-0.722618	0.102992	1.56689	1.51355	1.78897	0.330576	-0.0163765	0.493103	-0.659889	0.678975	-1.21854	-0.50966	-0.467108	-0.847349	-0.398528	-0.0719827	-1.27484	-1.35382
ENSG00000213722	O95865	23564	DDAH2	-0.897586	-0.228351	-1.25038	-0.153998	0.364383	0.0939217	-1.18606	-1.10542	-1.33028	0.170639	0.408335	0.0676585	-0.581428	-0.750049	-0.713852	0.775522	1.23768	1.05851	-0.424036	-0.414194	-0.636322	2.26907	1.46908	1.75715	-1.37056	-1.95027	-1.76872	-1.20753	-0.270848	-0.715156	-0.551609	0.0583543	-0.804679	-0.201218	-0.0343156	-0.624415	0.714981	-0.0386795	1.45529	0.250931	1.3191	0.664191	0.0525282	0.543066	1.30796	0.893608
ENSG00000204427	O95870	7920	ABHD16A	-0.373681	-0.583605	-0.0252868	-0.368827	0.0689723	-0.586955	-1.34919	-0.49601	-1.47102	0.577845	1.81536	0.426145	-0.839518	-1.00282	-0.489443	1.40226	1.56519	1.47371	-0.479259	-1.18017	-0.913726	1.40644	0.65772	0.765857	-1.92388	-2.23305	-1.89539	-0.924853	0.665218	-0.119969	-0.581332	-0.352749	-0.461881	-0.0322577	0.13202	-0.268356	1.38464	0.0795206	1.14164	0.624949	0.380001	1.0089	-0.234065	0.528067	1.55289	0.347611
ENSG00000117862	O95881	51060	TXNDC12	1.00822	1.45107	1.15403	-0.719849	-1.02951	-0.85441	1.09416	1.16533	0.825932	-0.859104	-0.703604	-1.10364	1.0325	0.62346	0.8411	-1.05309	-0.663407	-1.46559	0.593848	0.688002	0.891128	-1.25858	-0.59269	-1.0653	0.530621	0.444411	1.03751	-0.892839	-0.706793	-1.34385	0.337708	0.853411	0.9812	-2.47265	-1.35381	-1.41998	0.105742	0.194232	1.44096	0.328847	-1.02476	0.352445	0.384731	0.365675	1.3714	0.20935
ENSG00000163508	O95936	8320	EOMES	0.159135	-0.402467	-0.127199	-0.851552	-0.582173	-0.891016	1.07839	1.30602	1.03102	-0.832528	-0.758536	-1.08895	0.931262	1.46318	1.52296	-0.96007	-0.687688	-1.21342	1.52349	0.593832	1.25281	-0.68558	-0.718729	-1.06219	0.309129	0.332779	0.318137	-0.305202	-0.116153	-0.48794	1.09411	1.16948	1.00639	-1.31431	-1.61911	-1.18419	1.16732	1.34189	1.05831	-1.29406	-0.903596	-0.702225	0.897546	0.997372	1.09864	-1.02792
ENSG00000272325	O95989	11165	NUDT3	-0.345845	-1.21048	-1.36442	0.657997	1.22947	0.257238	-1.09521	-1.09471	-1.61643	0.366486	1.30945	0.422321	-0.496514	-0.545385	-0.548839	1.126	1.23617	1.1933	-0.690626	-0.872576	-0.894469	1.53426	0.777616	0.665203	-1.28348	-1.51015	-1.41866	1.14218	1.10625	1.10137	-0.936089	-0.644447	-0.94245	1.10803	1.08085	1.13212	-0.515014	-0.764979	-0.70954	1.06692	0.83294	0.946367	-1.04627	-0.961636	-0.550673	0.494373
ENSG00000115266	O95996	10297	APC2	-1.77399	-1.39624	-1.01998	1.23275	1.46389	1.68487	-0.150635	-1.29181	-0.607099	0.928129	-1.09243	-0.188047	-1.02977	-0.458881	-0.915308	0.991492	0.201542	0.603744	-0.00120615	0.544204	-0.341988	0.942451	0.761086	0.913215	-1.12392	-2.02096	-1.36872	0.798528	1.20969	0.734911	-1.25046	-0.940032	-0.642499	0.152703	0.0789133	0.298667	0.430316	-1.58452	-0.0440732	0.959178	0.333359	0.510968	-0.572793	-0.284098	0.356807	0.973516
ENSG00000142867	O95999	8915	BCL10	2.2237	1.47198	1.86768	-0.557257	-0.786426	-1.3362	-0.0446257	0.180228	-0.836028	-1.05048	0.0218949	-1.76768	1.23765	0.341675	0.204357	-0.802989	-0.276989	-0.630205	0.303024	0.465749	0.107093	0.901425	-0.708634	-0.528948	-1.1657	-0.829667	-0.645448	-0.787511	-0.884661	0.0983674	-0.826638	-1.09442	-0.403494	-0.775563	-0.965729	-1.27295	0.16541	-0.316606	0.436487	1.37538	1.19184	1.26631	0.433373	-0.301049	0.328966	1.67988
ENSG00000140990	O96000	4716	NDUFB10	-1.73181	-1.02457	-0.900632	0.929158	0.728269	0.765208	0.836482	-0.673749	0.348194	2.46641	0.746096	1.73623	-0.968923	-0.76072	-0.323703	0.983876	-0.38245	0.217967	-1.03377	-0.527982	-0.357668	-0.968944	-0.169538	0.0665644	0.482524	-0.691147	-0.37671	1.60475	0.670272	1.60912	1.35108	1.11458	0.716103	0.688284	-0.411139	1.02976	-0.806372	0.108733	-1.73185	-0.82366	1.2802	-0.715876	-0.488221	-0.668588	-0.614463	-1.05194
ENSG00000106341	O96001	10842	PPP1R17	-0.75648	-1.4168	-1.05545	0.552278	-0.594903	-0.770543	0.62355	0.412538	1.00102	-0.285155	-0.300371	-0.0925614	0.476406	2.3386	1.54053	-1.0052	-0.617954	-0.514687	1.00979	0.878337	1.40999	-1.23735	-0.836093	-0.759493	0.0619533	-0.178391	-0.507341	-0.439228	-0.550728	-1.12317	0.675329	1.24203	0.548593	-0.679445	-0.925871	-0.485728	1.8499	1.68823	1.56025	-0.56355	-0.442016	-0.491635	0.613575	1.20654	0.832014	-1.32987
ENSG00000164172	O96007	4338	MOCS2	0.0104752	0.367461	-0.848183	-0.893578	-0.614476	0.673357	0.869217	0.734029	1.80372	0.35368	-0.171741	0.0824682	0.26659	1.2133	0.593151	-0.870633	-1.20024	-1.26502	0.594551	1.01421	1.51585	-1.96772	-1.18638	-1.07409	-0.27	-0.629867	-0.0663738	1.08714	0.225968	0.892108	0.0848575	-0.324168	-0.199352	2.00998	1.92009	1.88376	-0.612322	-0.0647122	-0.832044	0.632873	-0.477867	0.0792835	0.134625	-0.568843	-1.9256	-1.26023
ENSG00000130204	O96008	10452	TOMM40	0.424563	1.19378	0.318434	-0.087804	-0.813452	-0.836761	-0.349486	0.827644	-1.21591	0.47549	1.18902	-0.10995	-0.17481	-1.93351	-0.969231	1.17235	2.03333	0.856325	-0.583379	-1.27388	-1.0239	1.37658	-0.304386	-0.191039	0.795566	0.22862	1.39369	1.35803	-0.407863	-0.653649	1.28951	0.637545	0.611245	0.479387	-0.206654	1.60681	-1.25032	-2.13097	-1.37386	-0.458052	-0.0212356	0.336917	0.168405	-1.11925	-1.59816	0.648783
ENSG00000183765	O96017	11200	CHEK2	1.22281	0.854627	1.01359	-0.38759	-1.32508	-0.541291	1.23504	1.29855	1.12322	-0.918192	-0.806283	-0.728737	0.72203	0.799683	0.805088	-1.12046	-0.942795	-0.946722	1.03732	0.37731	0.754535	-1.51866	-1.2172	-0.790789	1.09342	1.64646	1.01068	-1.23031	-1.03638	-0.981275	0.711638	0.971623	0.971623	-0.498647	-1.31394	-1.55288	0.765436	0.886036	0.202222	-1.01211	-0.34762	-0.338017	1.24455	1.01991	0.16515	-0.333925
ENSG00000109685	O96028	7468	NSD2	1.32401	0.877953	1.28904	-0.491089	-0.50119	-0.482402	0.778946	1.08556	1.07745	-1.08795	-1.27486	-1.30227	0.739306	0.632157	0.950189	-1.30522	-1.07285	-1.0581	0.788964	1.01029	0.788004	-0.949199	-0.911114	-0.905615	1.01278	1.32814	1.57565	-0.451878	0.386746	-0.245357	0.599411	0.286837	0.478808	-1.79631	-1.71899	-1.96595	0.372797	0.817726	-0.315229	-0.387119	-0.638167	-0.990594	1.22949	1.50093	-0.305997	-0.292021
ENSG00000148672	P00367	2746	GLUD1	0.324423	-0.0408657	0.501036	0.402544	-0.565127	-0.0789963	2.34544	1.68995	1.94817	0.650608	-0.767487	-0.251063	0.204728	0.0133179	0.333109	-0.566757	-1.58364	-0.904576	-0.492983	0.178936	0.21993	-1.78984	-0.760422	-1.01043	1.68057	1.39584	1.58553	-0.577012	-0.715601	-0.153608	1.30977	1.38725	1.19162	-0.506618	-0.48305	-0.876363	0.793645	0.822462	0.42171	-0.173582	-0.98746	-0.5345	-0.759577	-1.45927	-0.48834	-0.770968
ENSG00000228716	P00374	1719	DHFR	1.28664	0.588882	1.44084	-0.95937	-1.03346	-0.697664	0.993092	0.592123	0.931579	-0.78458	-1.22003	-0.901702	0.877447	0.742234	1.04926	-1.02662	-1.10578	-0.879251	1.07032	0.959006	0.975856	-0.878732	-0.902572	-1.11753	1.44197	1.11993	1.54394	-0.546024	-0.835222	-0.570507	1.18036	1.2413	1.1426	-0.880282	-0.937328	-0.529189	0.409125	1.12962	-0.324105	-1.21417	-0.912439	-1.16262	0.862206	0.929734	-0.496703	-0.310591
ENSG00000100243	P00387	1727	CYB5R3	-0.165023	0.21398	-0.515765	-0.103922	-0.353052	-1.06173	-0.586397	1.18902	-1.43869	1.1984	2.37249	0.00479765	-0.599812	-0.302721	-1.15228	0.38735	1.4661	0.711414	-0.780159	-0.775898	-1.5853	1.3827	0.532863	-0.0383712	-0.283563	-0.7577	-0.235678	1.25633	0.484389	0.421988	0.575764	0.962236	0.0842644	1.68721	1.59981	2.30763	-1.02091	0.307072	-1.41722	-1.03469	-0.230072	-0.763104	0.0311161	-0.706245	-0.811204	-0.388542
ENSG00000104687	P00390	2936	GSR	-0.806256	-0.923917	-0.75623	-0.184079	0.361118	0.218943	-0.789877	-2.45239	-1.47912	0.272331	-0.477798	-0.431455	-0.0340784	-0.0433789	-0.356855	1.03508	-0.323014	0.329084	0.374534	0.753013	0.543236	1.55798	1.92113	1.69199	-1.04363	-0.86794	0.584411	1.09463	0.449364	2.09953	-1.67792	-2.46986	-0.769118	-0.562783	-0.204452	0.344657	-0.668373	0.200308	0.433337	-0.686603	0.390454	-0.511956	0.200308	0.510528	0.807486	1.40849
ENSG00000198805	P00491	4860	PNP	0.471433	0.789605	1.09473	-0.781713	-0.950386	-0.735573	1.1143	1.47841	0.91839	-0.251771	0.0920669	0.359439	0.671823	0.436454	1.09983	-0.934021	-0.835578	-0.696107	-0.0698668	0.00777508	1.54849	-1.99864	-1.66231	-1.16678	1.20972	1.96962	0.988378	-0.863325	-1.2705	-0.35698	0.764244	1.03864	0.938349	-0.619767	-0.854277	-0.455539	1.1021	1.03402	0.525912	-0.604504	-0.512984	-0.916736	0.699171	0.125424	-0.0760397	-0.683371
ENSG00000165704	P00492	3251	HPRT1	-0.390144	-0.115055	-0.0699494	-1.69454	-1.21373	-1.67598	-1.16217	-0.460749	-1.60921	-0.644889	0.396311	-0.681142	0.856252	-0.318353	0.653787	0.290563	1.35028	0.941854	0.238277	0.39542	0.881234	1.35361	1.44246	1.23586	0.23963	-0.140425	0.789745	0.196224	-0.904767	-0.140425	-0.85205	1.12374	-0.0756238	-0.907175	-0.792735	-0.335064	-1.45299	-0.473859	-2.56697	1.49125	1.6938	-0.069392	0.112419	0.960079	-0.572862	0.965265
ENSG00000125166	P00505	2806	GOT2	-0.50378	-0.174115	-0.278411	0.157374	0.519767	0.492338	0.166966	0.0533791	-0.313482	1.39142	1.09036	0.896569	-1.12021	-1.55809	-0.781759	1.71517	1.03744	0.703199	-1.89001	-1.70014	-1.41361	0.494857	0.597889	0.416863	0.39696	0.119105	0.866242	0.916773	1.10755	0.732688	0.329294	0.0845272	0.434651	0.439948	0.382114	0.963458	-1.57236	-0.903423	-1.22974	0.360571	0.63231	0.45458	-2.05556	-2.11624	-1.72233	0.622987
ENSG00000146648	P00533	1956	EGFR	-0.119955	-0.196554	-0.564772	-0.925665	-0.324264	-0.391201	-0.992808	-0.482179	-0.35474	-0.814219	-0.495275	-0.414308	0.843711	0.142266	0.647704	-0.798795	-0.489618	-0.405422	2.33333	2.13824	2.53989	-0.595487	-0.00962173	-0.27026	-0.411122	0.266755	-0.407566	-0.01901	-0.165606	-0.257533	-0.55673	-0.597067	-0.55673	-0.779585	-0.601691	-0.615743	0.512032	0.258324	0.150301	-0.816079	-0.706315	-0.717115	2.81616	2.85769	1.00661	0.48361
ENSG00000102144	P00558	5230	PGK1	0.0924281	-0.0116662	-0.966899	-0.397509	-0.461704	-0.570463	-1.00797	-0.708208	-0.506518	-1.08062	-1.58138	-1.52366	0.68274	2.14513	0.177954	-0.379227	1.02838	-0.367377	0.39628	-0.0121925	0.785789	1.16053	1.22574	1.88043	1.55981	1.48739	1.35978	0.588184	1.07056	1.10083	-0.0536298	0.358536	0.510409	-0.743351	-1.55142	-0.523393	-0.551652	0.468992	-0.818463	-0.898421	0.0110787	-1.47253	-0.359807	0.465893	-0.889882	1.13832
ENSG00000106992	P00568	203	AK1	-0.939456	-0.903472	-1.34343	0.381921	0.813644	0.776169	-1.21905	-0.761515	-0.959453	0.719835	1.08553	0.865267	-0.783443	-1.15298	-1.05636	1.22499	0.987233	0.587633	-0.559392	-0.781729	-0.758725	1.83056	0.850364	1.09586	-0.524602	-1.17326	-1.44632	1.09524	1.0563	1.07694	-0.648129	-0.109175	-0.903244	1.47399	1.14187	1.44143	-0.655995	-1.61234	-1.21572	0.665631	0.758195	0.236351	-0.650196	-0.488702	-1.19465	0.979557
ENSG00000196839	P00813	100	ADA	0.497696	2.27856	1.55655	-1.19739	-0.908235	-0.668257	0.58656	1.95277	0.2954	-0.253778	0.621204	-0.357647	0.45855	-0.602559	0.0228094	-0.660744	-0.0298035	-0.563458	-0.0912142	0.630893	-0.0533507	-1.9341	-0.126187	-1.45427	1.51961	1.82362	1.80174	-0.895517	-0.0474729	-1.26406	0.242183	0.87063	1.12453	0.888838	0.709611	0.235448	-0.753684	0.282018	0.438292	-0.849042	-0.778575	-0.882103	-0.256855	0.265538	-0.909042	-0.882103
ENSG00000104267	P00918	760	CA2	0.772747	2.21948	1.60171	-0.960571	0.0223492	-0.424492	-0.674253	-0.245512	0.0646938	-1.66007	-1.2473	-1.09162	0.710522	0.733338	0.305403	-1.55715	-0.930872	-0.558023	0.908994	0.725856	1.20223	-0.368617	0.15166	0.299502	0.826994	1.00114	1.51731	-0.747522	-0.818039	-0.349175	-0.0977493	-0.122698	-0.204231	-1.07317	-1.32795	-1.1184	1.31546	1.35478	1.35382	-1.28454	-1.17854	-0.665145	1.1599	0.626966	1.22794	0.177572
ENSG00000101439	P01034	1471	CST3	-0.46195	0.916462	0.236	0.651204	-0.409029	-0.873356	0.324788	-1.21424	-0.483849	-0.013806	-0.893516	-1.82812	1.12995	0.711762	0.417526	-0.287982	-0.101224	-1.17819	1.54468	1.77586	1.96308	-0.517554	-0.209207	-1.19929	0.318328	0.00217426	0.573021	-0.507723	-0.304954	0.128285	-0.0514099	-0.203195	0.257038	-0.236432	-1.16795	-0.134901	-0.499346	0.622264	0.342656	-1.24399	-0.290243	-0.678133	3.56407	1.30709	0.394588	0.310662
ENSG00000133703	P01116	3845	KRAS	-1.52269	-0.694237	-2.9225	0.476814	1.3185	0.913569	0.197076	-1.15313	0.640376	0.376965	-0.289577	0.560425	-0.148849	0.624565	0.855543	-0.327927	-0.621632	-0.450287	-0.393722	0.744589	1.12188	-1.04669	0.62612	1.11482	-0.277241	-0.581908	-0.453537	2.27238	2.44639	1.5084	-0.781033	-0.831957	-0.540807	0.522305	0.239985	0.688661	-0.729005	-0.597209	-0.854384	0.675292	0.607958	0.348199	-0.878516	-0.28158	-1.70293	-0.138737
ENSG00000160789	P02545	4000	LMNA	-1.05167	-0.634615	-0.843958	-0.396261	-0.66816	-0.685774	-0.975068	-0.843655	-0.171684	-1.00703	-0.899388	-0.010774	-0.027178	0.535222	0.11492	-0.406844	-0.209603	0.495809	-0.142942	1.23656	0.487988	1.51204	2.93517	1.65689	-1.30749	-0.259086	-1.42143	-0.538694	0.434292	0.356947	0.14722	-0.677255	0.785364	-1.69118	-1.01989	-1.9506	-0.122955	0.268528	0.981839	-0.15806	0.291224	0.198787	0.375293	0.496786	1.79007	0.526174
ENSG00000130203	P02649	348	APOE	0.548497	2.04823	0.916483	-0.217968	-1.8623	-1.14554	-0.550788	-0.440074	-0.713598	-1.25789	-0.691881	-0.997043	0.536641	-0.497361	-0.489734	-0.691353	-0.645686	0.147134	0.559623	1.20204	0.973926	1.426	1.4893	0.35334	1.46983	0.815304	1.50959	0.204858	0.171736	0.506455	-0.568128	-1.13635	-0.861161	-1.80449	-1.44143	-1.72711	-0.0419782	-0.409286	-0.369218	-0.716021	0.211759	0.199666	1.53219	0.101899	0.381391	1.84629
ENSG00000072274	P02786	7037	TFRC	0.742728	2.31142	1.12363	-0.50913	0.172967	-0.193892	-0.258866	0.331952	-1.44035	-0.507584	-0.856943	-1.68659	0.224367	1.19621	0.520492	-1.70312	0.16994	-0.381254	1.21434	0.500445	1.06039	-0.816943	-1.02361	-0.190596	0.0577553	1.59568	0.717917	-1.15565	-0.175773	-0.243547	-0.577329	-0.0419501	-0.339907	-1.88953	-1.98644	-1.51732	0.74705	0.932966	0.703784	-0.242749	-0.66542	-0.0286795	1.78577	1.56007	0.367384	0.182446
ENSG00000087086	P02792	2512	FTL	-0.809434	-1.79818	-1.10654	-0.966126	-1.63739	-0.637064	-0.0781451	-0.323424	0.153743	-1.10084	-1.36219	-0.426425	0.431577	0.917613	0.329627	0.655881	0.676982	0.355094	0.906509	0.788409	0.628514	1.41526	1.61675	1.3698	-0.424712	0.0807099	-0.334654	-0.726248	-0.458538	-0.481728	0.166409	0.0843921	-0.262952	-1.32305	-1.18764	-0.969012	1.44763	0.647908	2.88132	-0.365908	0.429835	0.143922	-0.00538446	-0.500755	2.34448	-0.0982612
ENSG00000167996	P02794	2495	FTH1	-1.37495	-2.16328	-1.1781	-0.569453	-1.45854	-0.585275	-0.683005	-0.808464	-0.201489	-0.119885	-0.127309	0.249842	-0.02905	0.236925	-0.091757	1.30563	1.16474	0.721787	0.322502	0.517526	0.376443	1.36757	1.75289	1.37471	-1.53872	-1.18305	-0.974162	0.513248	-0.535636	0.247621	-1.60826	-0.945095	-1.87725	0.894646	0.814377	0.244026	0.200129	-0.266553	1.33559	0.719683	0.782225	1.01425	-0.178947	-0.619116	1.84753	-0.195797
ENSG00000113161	P04035	3156	HMGCR	0.561783	-0.171661	1.06916	1.09763	-0.310356	0.0344761	0.807332	0.561739	0.780984	1.65706	1.40406	-0.0409725	-0.718155	-0.271714	-0.407848	1.13206	0.0509088	-0.121356	-0.66683	-0.343163	-1.01755	-1.67087	-0.805059	-2.61167	1.01183	0.592654	0.839401	1.49238	0.761269	1.34586	0.554903	0.555828	1.20079	0.650703	0.239332	1.005	-0.427766	-0.411411	-1.22908	-0.0999534	-0.265833	-0.279526	-1.36693	-1.592	-1.74979	-1.04091
ENSG00000179163	P04066	2517	FUCA1	-1.54683	-0.990559	-1.0731	0.367081	1.16977	0.557528	-0.754544	-1.25632	-1.02414	1.31538	0.123393	0.375088	-1.00187	-0.683824	-0.563376	1.72947	0.836129	0.963277	-0.97744	-0.310208	-0.406039	0.420304	1.52242	1.2084	-0.645156	-1.25153	-0.0232475	1.48993	1.72207	1.42604	-1.11209	-0.839075	-0.573078	1.19866	1.24473	0.909866	-1.07153	-0.856072	-1.2387	0.792405	0.217939	0.466387	-0.921061	-1.06445	-0.997229	0.443512
ENSG00000149925	P04075	226	ALDOA	-0.21412	0.189947	-0.248891	-0.706636	-0.843883	-0.374911	-0.073935	-0.182985	0.57739	-1.03138	-2.18572	-1.51082	0.867043	2.36558	0.803381	-1.17508	0.592492	-0.601746	0.829163	0.130288	1.14401	-0.240667	0.77115	1.12033	1.17219	1.71519	1.56172	0.620025	0.257541	0.38174	0.493355	0.820611	0.76142	-1.03215	-1.3779	-0.563828	0.0704521	0.906286	-0.283232	-1.74699	-0.296442	-1.74623	0.0274775	0.0946765	-0.217335	0.777213
ENSG00000065154	P04181	4942	OAT	-1.45124	-2.28641	-1.06129	0.189036	-0.029085	-0.355341	-0.166586	-0.0192085	-0.356571	0.183591	-0.183768	-1.30374	-0.171219	1.71748	1.03076	0.365856	0.508896	-0.0115271	-0.698918	0.623474	0.398434	-0.513545	2.16499	1.42592	-1.23423	0.0276695	-0.995776	0.131853	0.713526	0.0480008	-0.365241	-0.147181	-0.848907	-1.09968	-1.92029	-1.09968	1.86785	2.2841	0.900328	-0.275482	-0.124428	-0.0681077	1.11108	0.423078	-0.060658	1.31705
ENSG00000167900	P04183	7083	TK1	1.15939	1.07186	1.49365	-0.797017	-1.34186	-1.34015	1.08897	1.09045	0.541983	-0.616784	-0.685011	-1.21255	0.839187	0.839449	0.827359	-0.784639	-0.834745	-1.00418	1.05711	0.791437	0.527187	-0.569156	-1.09892	-1.043	1.29015	1.23899	1.2224	-0.541145	-0.788829	-0.841123	1.36417	1.10971	1.04811	-0.574734	-0.963651	-0.647347	0.476233	1.166	-0.0603968	-1.17699	-1.18822	-0.971838	1.12172	0.881846	-0.0507736	-0.678714
ENSG00000154096	P04216	7070	THY1	-1.31347	-0.9296	0.34728	-0.164461	0.218923	0.0574391	-1.38623	-0.998025	-0.784887	-0.450307	0.884119	1.48136	-1.02539	-0.603111	-0.409157	1.5371	0.168308	2.69518	-0.478806	-0.20855	-0.54221	0.422557	0.283681	1.19825	-0.854227	-0.469987	-0.64923	0.692006	0.595467	0.743424	-0.173413	-0.461015	-0.0911536	1.69108	1.74845	1.52818	-0.874909	-0.645366	-1.06629	0.762793	1.15448	0.495571	-1.11114	-0.970818	-2.16167	0.299046
ENSG00000160307	P04271	6285	S100B	0.750483	0.0898241	-0.743915	0.487475	-1.68012	0.129021	-0.145349	-1.87643	0.300062	0.206988	-1.58857	-0.166107	0.49431	-0.305569	0.491512	-0.0630634	-1.23619	-0.382284	0.930402	1.62448	2.50868	0.074774	-0.453153	0.552732	0.238187	-0.501629	0.67041	-0.149875	-0.476437	-0.553911	-0.294165	-0.413645	-0.418343	-1.25207	-1.25207	-1.25207	0.651966	1.38418	0.719118	-1.25207	-0.548563	-0.269371	2.52567	2.11967	0.537677	0.0272846
ENSG00000111640	P04406	2597	GAPDH	0.680703	0.295988	0.441339	-1.16986	-0.227539	-0.160721	-0.079915	-0.136396	-0.166536	-1.7943	-2.19799	-1.31852	0.969818	1.51069	1.0435	-1.41292	-0.144381	-0.475471	1.26636	0.0945121	1.21231	0.577137	0.218466	0.973735	1.34604	1.47564	1.72456	-0.0188134	-0.231715	-0.135512	1.19553	1.24504	1.29395	-1.05489	-1.59471	-0.752157	-0.128173	0.893294	-0.462887	-1.39357	-0.464785	-1.08712	0.472869	0.393682	-0.472609	-0.234572
ENSG00000126522	P04424	435	ASL	1.46758	1.15039	0.732248	-0.258585	0.270688	-0.374125	0.875587	1.63738	-0.0889488	-1.46512	-0.29511	-0.954468	1.03354	1.37075	0.445941	-1.49381	-1.42215	-0.671391	0.892292	-0.0902844	0.221756	-0.595133	-0.883032	-1.506	0.192922	1.43478	0.888812	0.722111	0.372256	0.253023	0.115035	0.303038	0.743907	0.0838416	-0.477017	-1.6958	0.785124	0.686131	1.26205	-1.08337	-1.2631	-0.608097	0.604749	0.582014	0.969116	-1.36609
ENSG00000206503	P04439	3105	HLA-A	0.586787	0.861138	0.167802	-1.77938	-0.36192	-0.658387	-1.38183	-1.02219	-0.276177	-0.822784	-1.08569	-0.464679	0.94629	1.4895	1.26087	-1.33121	-0.683204	-0.511022	0.89407	1.38318	1.64239	0.356659	0.386696	0.403088	-0.0921472	0.440967	0.926168	-1.06322	-0.568111	-0.661382	-0.223802	-0.269552	0.181268	-1.1964	-1.30303	-0.957926	1.0184	0.981598	1.20422	-1.30032	-0.56739	-0.885596	1.43223	1.17919	2.2146	0.608157
ENSG00000141736	P04626	2064	ERBB2	0.800595	1.88545	0.306531	-0.596689	-1.88366	-0.196999	1.2162	0.513651	1.54155	-0.0985809	-1.21376	-0.76322	0.56581	0.00122196	1.16656	-0.567664	-1.13279	-1.27905	0.0702591	0.895992	0.998844	-0.871361	-0.972667	-0.386211	1.16166	1.15377	1.54033	-0.836765	-0.493987	-0.45823	1.17685	0.652957	1.1324	-1.40337	-1.36444	-0.714863	0.902226	0.882307	0.632115	-1.74124	-0.530449	-1.1262	0.505393	0.881162	0.164407	-0.736688
ENSG00000126247	P04632	826	CAPNS1	-0.800024	0.67333	-0.829233	-1.75481	-1.00527	-0.287854	0.629759	0.0202733	0.561923	-0.903035	-0.881493	-0.927127	0.687822	0.575933	0.966323	-1.07555	-1.17214	-0.565327	1.02909	1.75126	1.8121	-0.361225	1.05276	0.802505	-1.09719	-1.40805	-0.154403	-0.623998	0.129417	-1.86935	1.2615	1.8553	1.35777	1.24933	-0.060843	0.780322	-1.36289	1.55292	0.0333511	-0.592808	0.291993	0.1671	0.526781	0.0269054	-0.080426	-0.910334
ENSG00000106211	P04792	3315	HSPB1	-0.509318	0.357849	0.0281032	-1.2573	-1.12777	-0.966288	1.09396	1.48747	1.37143	-1.11691	-0.794151	-0.908242	0.751549	1.38483	1.06422	-1.20427	-0.624379	-0.87187	1.12238	0.929299	1.10995	-0.927435	0.205931	-0.599047	0.772516	0.938152	1.05382	-0.371967	-1.35407	-0.783954	1.25736	1.14531	1.02396	-0.605964	-1.07102	-0.483494	0.869175	1.38621	0.6365	-1.38855	-0.670833	-0.918306	0.732047	0.888472	0.499596	-1.09194
ENSG00000176890	P04818	7298	TYMS	1.208	1.38419	1.4736	-0.764449	-1.13575	0.024228	0.568801	0.549251	0.710439	-0.983913	-1.41401	-0.3762	1.06939	0.348994	0.753781	-1.24339	-1.26611	-0.694066	0.879031	1.08014	0.824161	-1.32795	-1.05939	-0.608779	1.26569	1.16592	1.23462	-0.728786	-0.60263	-0.581565	1.18706	1.12674	1.11794	-1.12648	-1.57946	-0.502874	0.393115	1.04976	0.112738	-0.908229	-0.886483	-0.981929	1.13226	1.12817	-0.0911523	-0.9709
ENSG00000118705	P04844	6185	RPN2	1.69716	1.5356	2.39651	0.538164	-0.455404	-0.7018	-0.158589	0.732512	0.0579265	0.568677	0.144348	0.000260476	0.507974	-0.189762	-0.0670671	-1.82944	-0.957681	-0.232781	-0.879348	0.334303	-0.326436	0.246295	-1.29975	-1.66167	0.073676	-0.742688	0.239332	0.164869	0.0502723	0.00543171	1.13254	0.679452	0.81964	0.59667	0.134878	1.53666	1.01985	0.332341	1.04352	-1.21765	-1.37981	-2.06993	0.41389	0.130155	0.988064	-0.903808
ENSG00000114353	P04899	2771	GNAI2	1.06393	1.15974	1.49454	-0.958796	0.146893	-0.177344	1.47592	1.13665	0.621876	-1.3311	-1.41054	-1.10312	0.670029	0.664424	0.389081	-1.47707	-1.61807	-1.11293	-0.153353	0.774139	0.664574	-0.498026	-0.203229	-0.218215	1.11666	1.60805	1.66647	-0.49153	0.0136364	-0.442386	1.52898	1.21209	1.32864	-0.623408	-0.905845	-0.736312	0.0507296	1.00907	-0.261743	-1.4182	-0.733881	-1.30603	0.341335	0.42134	-0.588397	-0.860939
ENSG00000163399	P05023	476	ATP1A1	1.32643	2.59503	1.74337	-0.542303	-1.12458	-1.39004	0.595695	0.764418	0.0586372	-0.804628	-0.694342	-1.46923	1.2196	-0.330084	0.420362	-0.234274	-0.613979	-0.58081	-0.547069	-0.520588	0.521277	0.322458	-0.333442	-0.381896	0.130313	0.983126	0.817869	0.952315	0.479625	0.882687	-0.269195	-0.443686	-0.724457	0.828286	0.75184	0.434347	-1.37847	-1.12878	-1.58372	0.754998	0.869096	0.162701	-0.820391	-1.48717	-2.38135	0.741771
ENSG00000143153	P05026	481	ATP1B1	-1.0087	-0.157252	-0.352211	1.76624	2.04365	0.0684868	-1.20496	-0.675414	-2.02269	0.590061	1.21647	-0.352746	0.536569	-0.877828	-0.599514	0.452221	0.823755	0.687332	-1.31688	-0.283958	-0.99895	0.604308	0.34948	0.712529	-1.15362	-0.478965	-2.30978	1.72169	1.86697	1.57838	-1.14124	-0.430903	-1.5144	0.609865	0.488135	0.541428	-0.0556205	0.298039	0.21435	0.0234028	0.74562	0.0180164	-0.950754	-0.716763	-0.0514839	0.572447
ENSG00000142192	P05067	351	APP	-1.00038	-0.357348	-1.82563	0.727007	1.3244	1.62581	-1.69869	-1.86282	-0.777068	0.633946	0.61832	0.519308	-1.14434	-0.294066	-0.0162292	0.848988	0.45571	1.22172	-0.482552	-0.541765	0.142018	0.472447	0.614551	0.796667	-1.43912	-1.4751	-1.11337	0.915914	1.23157	1.0443	-1.39349	-1.23039	-1.35828	0.659712	0.892974	0.529245	-0.586659	-0.603337	-0.136402	0.959347	0.889732	0.886551	-0.888742	-0.690208	0.0856891	0.995878
ENSG00000111275	P05091	217	ALDH2	-0.693785	-0.210936	-0.412997	-0.0093092	0.113234	-0.0631753	-0.335387	-0.137938	-0.983816	1.34983	1.45668	0.539105	-0.948691	-1.27739	-0.855644	1.50958	1.27298	1.41319	-1.25798	-1.31015	-1.46995	1.3374	0.67278	0.302359	-0.840866	-0.659483	-0.30879	-0.531212	-1.20467	-0.049497	0.11776	0.314489	-0.279034	-0.00279884	-0.481751	-0.60876	1.19487	-0.355744	1.55141	1.6849	0.39248	1.98968	-1.35891	-1.61815	0.922739	-0.978905
ENSG00000205581	P05114	3150	HMGN1	1.01023	1.87644	0.334321	-0.344907	-0.783467	-0.977396	0.108294	1.03715	-0.906053	-1.00635	-0.92143	-2.10247	1.40652	-0.720012	0.1409	-0.764612	0.755058	-0.161806	-0.438022	-0.176124	-0.448966	1.90712	0.682791	0.492807	-0.632133	-1.39955	-0.899659	0.0193066	1.5702	1.00191	-1.219	-1.18663	-1.22746	-0.594428	-0.642472	-0.898477	-0.858192	0.163717	0.00766443	0.290971	0.208013	0.477773	-0.143233	0.628932	0.482943	0.999559
ENSG00000005022	P05141	292	SLC25A5	-1.95365	-1.66733	-1.98817	-0.0889383	-0.773269	0.347804	0.581911	-0.307111	0.794115	2.15108	0.804746	1.2232	-0.900645	-0.432626	0.0880473	1.24398	0.13824	0.00659682	-0.114465	0.314312	0.335836	-0.780847	0.441013	0.536177	0.777522	0.977991	0.642676	-0.381012	-2.42525	-1.1795	1.36933	1.42656	0.636249	0.358037	0.809255	0.882524	-0.373555	1.48559	0.120572	-1.30775	-0.634885	-0.403059	0.446532	0.0051977	-0.356433	-1.03471
ENSG00000175198	P05165	5095	PCCA	1.32361	0.449151	-0.145278	0.945369	1.42001	1.56057	0.990849	0.892495	1.20019	0.218122	0.02578	-0.244134	-0.033545	-0.998921	0.0913094	-0.568659	-1.56222	-1.65049	-1.73165	0.0572652	0.116913	-1.11125	0.0221138	-1.2676	1.43551	1.66776	1.15221	0.391545	0.669575	0.32299	1.28727	0.972601	1.02311	-1.32978	-1.78756	-1.28181	0.411024	0.281839	-0.421828	-1.25405	-0.827657	-0.93271	0.167926	-0.0951517	-0.700101	0.341469
ENSG00000114054	P05166	5096	PCCB	1.82459	2.15916	1.41805	0.457988	0.829372	-0.100077	0.564119	1.75723	-0.234458	-0.332464	-0.0841866	-1.10483	0.704202	-1.1838	-0.509371	-0.642951	-0.984191	-0.877969	-0.841886	-0.873841	-0.16589	-0.104963	-0.650212	-1.02363	0.447065	0.218558	1.02367	0.0565891	-1.11952	-0.879031	0.101212	-0.472511	0.137638	-0.288357	0.150578	1.15123	0.882565	0.722186	1.42863	-0.210835	-1.00019	-1.25604	0.614803	0.839376	1.98317	-1.68976
ENSG00000198830	P05204	3151	HMGN2	-0.00741353	0.0550505	0.367235	-1.06367	-1.28107	-0.462842	0.785203	0.0655028	1.18267	-1.07974	-1.59975	-1.44663	1.31839	0.483249	0.656415	-1.24825	-0.658236	-0.759285	1.52022	1.93194	0.98363	-0.0643052	0.143765	0.177917	1.18884	0.90779	1.21348	-0.908102	-0.827057	-0.837822	0.956113	0.914493	0.977291	-1.0436	-1.04537	-0.888307	0.256636	1.23948	-0.0882896	-0.968823	-0.971474	-0.804615	1.59758	1.6646	-0.162033	-0.626665
ENSG00000137818	P05386	6176	RPLP1	0.466802	1.22349	1.36531	-2.36158	-0.270933	0.706582	-0.425606	0.23204	-0.0749778	1.79965	-0.222844	-0.124469	-1.00391	-0.98231	-0.0273131	1.45784	0.715292	0.184872	-1.33258	-0.321827	-0.068742	0.866434	-1.54298	-0.258241	1.99311	2.21293	2.32072	-0.866616	-1.13349	-0.805847	0.7196	0.266605	0.796364	-0.572879	-0.53671	-0.871802	-0.426889	-0.236366	0.20783	-0.786502	-0.262328	-0.343922	0.511979	-0.660474	0.322299	-0.412209
ENSG00000177600	P05387	6181	RPLP2	0.363349	2.75289	2.34564	-0.11531	-0.0560183	0.422045	0.141006	0.395986	-0.0498545	0.00810007	0.846635	-0.131806	-0.677156	-0.532094	0.0863559	0.325239	0.0975901	-0.00908752	-1.07704	-0.440941	-0.361022	-1.60775	-1.2455	-1.48126	1.58203	2.11408	0.670094	-1.33972	-1.8726	-1.15384	1.46892	1.06923	1.09468	-0.302997	0.176686	0.223923	-0.785432	0.391691	-0.46174	-0.879555	-0.97222	-0.322222	0.762244	0.0262806	0.0965738	-0.616453
ENSG00000121769	P05413	2170	FABP3	-0.233079	-0.79567	-0.864197	1.51517	0.0443738	0.54895	-0.486771	-0.535593	-0.478819	1.66657	2.12563	1.43397	-0.91362	-1.08001	-0.803731	1.36069	0.543117	0.232287	-1.08651	-1.17605	-1.17501	0.22566	0.057602	-0.124961	0.213573	0.0974146	-0.519478	1.59968	0.344694	1.42416	-0.589969	-0.0509074	-0.277875	1.14205	1.10708	0.668624	-1.27392	-1.64005	-1.64005	0.620358	1.14036	0.737935	-0.81014	-1.32284	-1.64005	0.334281
ENSG00000150093	P05556	3688	ITGB1	0.297063	0.964841	0.784189	-0.454409	-1.77302	-1.17671	1.13046	0.88177	0.602792	-0.849095	-1.52993	-1.38393	0.769782	1.10092	0.898884	-1.21684	-0.897255	-0.686627	0.923106	1.17261	1.13568	-0.542511	0.0705079	-0.222278	0.515011	0.608803	0.669279	-1.00468	-0.79712	-1.20026	0.740784	0.751524	0.772253	-1.20098	-1.52219	-1.31494	1.10169	1.00966	1.21944	-1.23871	-0.768141	-0.945835	1.30047	1.15453	1.16135	-0.128559
ENSG00000166501	P05771	5579	PRKCB	1.73187	0.725315	2.29861	0.545025	0.386131	-0.162864	1.6771	0.968798	0.775121	-0.0159997	0.201191	-0.69231	-0.794623	-0.122422	-0.568685	-0.401179	0.259483	-1.16367	-1.14368	-0.695032	-1.31776	-1.05081	-0.160351	-1.27925	1.33227	1.44793	1.69715	1.42452	1.40648	0.941922	0.412622	0.265618	0.622691	-0.268057	-0.152393	0.227045	-0.0982437	0.0281327	-0.290866	-0.914275	-1.16661	-0.5242	-1.26523	-1.40628	-0.656258	-0.306372
ENSG00000111057	P05783	3875	KRT18	2.90876	2.1674	1.45459	0.429543	-0.639175	-1.01721	-0.468603	0.443882	-0.628483	-0.790987	-0.846392	-0.957523	0.618642	0.199547	0.145635	-0.547713	-0.684564	-0.0998714	-0.413726	-0.505168	-0.532031	0.63263	-0.0360315	-0.833144	1.68093	1.83564	2.40789	-0.0349577	-0.0738829	0.407143	-0.31328	-0.583928	0.486853	-0.46296	-1.0242	-0.99782	0.0404729	-0.823157	-0.24283	0.696638	0.512663	0.4548	-1.36691	-1.01096	0.701776	-0.277713
ENSG00000104327	P05937	793	CALB1	3.05172	2.14926	0.300969	-0.0402788	0.471108	0.951851	0.247043	-0.679172	0.392281	-0.778634	-0.705148	-0.94729	0.858142	-0.569409	0.289466	-0.707154	-0.76474	-0.855141	-0.806397	-0.614823	0.444478	-0.633759	-0.642412	-0.411959	0.654581	1.1879	1.29915	1.03144	2.40112	2.03818	-1.12859	-0.508667	-0.564943	-1.0007	-1.25505	0.350623	-0.67082	-0.879576	-0.787806	-0.315934	-0.00845581	-0.579467	0.581271	-0.216595	-0.911924	0.16939
ENSG00000126088	P06132	7389	UROD	1.47327	1.755	1.52712	-1.44574	-1.63001	-1.48068	-0.195176	1.57188	-0.315646	-1.18212	-0.335989	-0.70851	0.937614	0.393738	0.19994	0.611107	0.0496388	-0.0486419	0.506009	-0.398995	-0.0128358	0.554326	-0.822881	-1.00242	-0.262908	-1.15702	-0.934952	-1.40699	-0.963605	-1.07361	1.31055	1.08332	1.06359	0.0162627	-0.834115	-1.3359	0.135467	1.52004	1.49186	0.0596718	1.06359	0.61798	0.799876	-0.706589	0.767612	0.352913
ENSG00000010810	P06241	2534	FYN	-1.46853	-0.149029	-0.574652	-1.21435	-0.698402	-0.0680096	0.360194	0.896933	-0.229301	-1.89691	-1.52455	-0.913658	0.146233	-0.118715	0.0636316	-0.420969	1.01178	0.870152	1.07766	-0.0389917	0.235388	1.72787	1.07772	1.8485	-0.800745	-0.76634	-0.78968	-0.791956	-0.162071	-1.01709	0.337638	0.458666	0.441112	-1.19888	-1.8223	-1.88742	0.984074	0.223018	0.820991	-0.180233	0.387151	-0.302733	-0.0333467	0.397652	1.18306	1.10524
ENSG00000114200	P06276	590	BCHE	0.222481	-0.10237	-0.599108	-0.234418	-1.28365	0.00583469	0.192166	-0.0668663	0.0337409	-0.447752	-1.0463	-1.04288	1.71486	-0.200629	1.46646	-0.835447	-0.903261	-0.736372	1.1072	1.73649	2.50109	-0.410202	-0.419725	-0.651346	0.487865	0.63366	0.351834	1.0315	-0.0553054	1.21093	0.510517	1.03776	-0.278033	0.427964	-0.517581	0.749885	-0.645014	0.567046	-0.388041	-1.04647	0.433109	-1.36576	1.47628	1.17065	-0.799166	-0.968975
ENSG00000102393	P06280	2717	GLA	1.62337	0.613017	0.837531	0.402264	-0.260926	-0.588052	1.40376	1.14845	1.24575	0.540817	0.461607	0.625397	0.278709	-0.70493	0.346816	-0.933717	-0.988442	-0.416037	-1.22022	0.315102	0.132547	-2.24034	-1.00038	-1.62209	-1.84692	-0.540266	-1.16759	-1.1083	-0.197311	-0.138113	-0.0846095	0.287749	-1.16026	0.886118	0.704026	0.963468	-0.772304	0.761746	-1.86407	0.729244	1.96286	0.490429	0.409307	0.345242	-0.459327	1.26111
ENSG00000148180	P06396	2934	GSN	-0.304581	1.66732	0.811813	-0.688407	-0.849181	-1.32938	-0.164179	0.526404	-0.596159	-1.56713	-0.112494	-0.830966	0.506636	0.65424	-0.287258	-0.872835	-0.300291	0.31961	-0.971796	1.26703	-0.794418	1.16142	2.52674	0.227864	0.53271	1.04257	1.76988	-1.24561	-0.517981	-0.570469	1.07742	1.09733	1.12965	-0.293445	-0.689097	-1.23866	1.27962	1.70992	0.541429	-1.16141	-1.04908	-0.959632	-0.148982	-0.374013	0.294058	-0.230216
ENSG00000139687	P06400	5925	RB1	1.12581	1.07091	1.26528	-0.994857	-1.27447	-0.651281	0.812743	1.20743	0.806621	-0.94589	-1.07163	-0.831642	0.803218	0.579049	0.80002	-1.0181	-0.905891	-0.938984	1.25663	0.924191	0.892283	-0.835421	-1.06232	-1.0137	1.17126	0.631344	1.31543	-0.610485	-0.457708	-0.572958	1.16853	0.835561	0.903443	-1.30629	-1.73319	-0.776071	0.810339	1.01385	0.654006	-0.665852	-0.964735	-0.992641	1.08925	1.17633	0.399627	-0.98585
ENSG00000187514	P06454	5757	PTMA	0.863267	0.173383	1.28415	0.603539	-0.145793	0.546738	-0.351813	-0.400261	-0.483246	-0.462273	-1.57169	-1.93265	-0.479861	-1.09458	-0.549539	-1.02026	1.09599	0.235344	-0.670719	-0.281241	-0.127608	1.91619	0.860692	1.99224	1.91583	0.333249	0.655154	-0.81922	-0.242733	0.325893	0.74194	0.980592	1.32739	-2.09857	-1.90379	-0.810127	-1.11121	-0.866843	-0.88596	0.322658	0.258948	-0.343851	0.463673	0.613703	-0.869411	0.982049
ENSG00000170312	P06493	983	CDK1	1.01159	1.0039	1.25939	-0.933471	-1.01446	-0.701104	0.790003	0.94595	0.969822	-0.891724	-0.973955	-0.736365	0.862798	0.681128	1.11958	-0.858845	-0.899536	-1.1759	1.03618	0.915048	0.996136	-1.16146	-0.919449	-1.32526	1.01365	1.04294	1.0586	-0.754118	-1.38688	-0.721397	0.979586	1.03846	0.966495	-1.10739	-1.43537	-0.917841	0.772412	1.14737	0.572978	-0.99593	-0.886688	-0.803316	1.17846	1.18347	0.453444	-0.802268
ENSG00000110955	P06576	506	ATP5F1B	-1.2316	-0.49592	-0.567674	0.476611	0.406233	0.30941	-0.207449	-0.34832	-0.534643	1.5428	1.78101	1.37642	-0.997823	-1.62949	-0.823984	1.71895	0.918964	0.986745	-1.14044	-1.06269	-0.955199	0.182335	0.211054	0.0847025	-0.317935	-0.920217	-0.0155539	2.67061	0.936872	1.37158	0.43835	0.403894	0.0985174	1.20325	0.425613	1.74747	-0.694735	-0.289021	-0.890903	-0.586888	0.127528	-0.844876	-0.326672	-0.58785	-1.26376	-0.509136
ENSG00000074800	P06733	2023	ENO1	0.956378	0.280382	-0.150515	-0.487835	-0.433976	-0.263174	0.292411	-0.123808	0.835002	-1.13727	-1.90067	-1.13473	0.97959	2.28732	0.918946	-1.2407	-0.397536	-1.12214	0.22456	0.424188	1.75825	-0.970377	-0.0788371	0.48454	1.54747	1.82201	1.60762	0.306893	0.242432	0.439552	0.896736	0.981444	1.19173	-0.78227	-1.20817	-0.687804	-0.157048	0.444168	-0.77607	-1.42688	-0.451718	-1.35107	0.328362	0.271413	-0.743914	-0.123681
ENSG00000100504	P06737	5836	PYGL	0.00732043	-0.101214	-0.393809	-0.84186	-0.684865	-0.677559	-0.155382	0.0755368	-0.133868	-0.786676	-0.862579	-0.790286	2.34567	0.349488	1.59072	-0.894232	-0.644005	-0.740748	0.842644	0.882548	2.70291	-0.52116	-0.192504	-0.376083	0.509059	0.80112	0.172733	-1.08641	-0.665773	-0.400595	-0.077272	0.507428	0.368876	-1.13289	-1.16032	-1.55353	1.30679	2.00398	1.10211	-1.01695	-0.683988	-0.591421	1.84172	0.555371	1.00779	-0.448223
ENSG00000105220	P06744	2821	GPI	1.26246	0.290726	-0.653821	-0.360191	0.164315	-0.156757	-0.783887	-0.911312	-0.338707	-0.812409	-1.65647	-1.41302	0.788473	2.7909	0.368849	-0.238992	0.41447	-1.13068	0.0185296	-0.456028	1.20469	-0.211523	0.499547	1.32084	0.949979	1.90093	1.16589	1.62145	1.90325	1.27736	-0.59926	-0.410706	-0.0108061	0.039524	-0.228344	0.163277	-1.22156	-0.212797	-1.68105	-0.479479	-0.279864	-0.782196	-0.611497	0.0712398	-1.43715	0.0613987
ENSG00000070501	P06746	5423	POLB	-1.24953	-1.10014	-2.04111	0.831691	1.88568	1.55546	-0.618864	-1.36241	-0.218251	0.638726	-0.203529	0.474561	-0.929149	-0.436467	-0.0652309	0.705647	0.108201	0.663942	-1.06493	-0.159577	-0.0757934	0.288409	0.760827	1.61184	-1.3861	-2.10773	-1.91258	1.31024	1.05789	0.76653	-0.910444	-0.0242362	-0.788666	0.025615	-0.141704	0.519619	-0.814523	-0.19826	-0.152344	0.661502	0.8272	0.999122	-0.735683	0.256876	-0.602321	0.76227
ENSG00000138448	P06756	3685	ITGAV	0.193199	0.706652	0.500463	-1.10623	-1.80204	-1.67438	0.553339	1.23057	-0.0256384	-0.972194	-0.721142	-0.660097	0.763354	1.3062	1.09874	-1.22118	-0.668648	-0.363681	1.57621	1.05759	1.28817	-0.397149	-0.402471	-0.259632	-0.225466	-0.423805	-0.434565	-2.13115	-2.58051	-1.64325	0.0128225	0.209192	0.0264098	0.290833	0.711297	-0.124092	1.06942	0.899251	1.58128	0.031822	0.295652	-0.79134	0.596704	0.845565	0.548768	0.659598
ENSG00000143819	P07099	2052	EPHX1	-1.35841	0.395644	0.402941	-0.960304	-1.56211	-0.883387	-1.2716	-0.792542	-0.964602	-0.428017	-0.599378	-0.832696	0.557278	0.364541	-0.26346	0.0953844	0.432272	0.544018	0.885763	1.14579	0.368931	2.15599	2.02489	0.543065	-1.39538	-0.196111	-0.0593214	-0.476971	-0.639251	0.352307	-1.15205	-1.4644	-0.761454	-1.64106	-1.09506	-1.55554	1.12028	0.96084	1.504	0.70944	0.489692	0.932227	0.35775	0.510441	1.34383	0.800922
ENSG00000155368	P07108	1622	DBI	-1.39416	-1.28561	-1.08703	-0.438045	-1.04847	-0.350493	0.811739	0.125706	0.532264	0.244201	-0.941556	-0.552527	0.927698	1.02184	1.01487	-0.723743	-0.597867	-0.329885	1.63518	1.75868	2.00194	-0.831172	-0.454634	-0.038934	0.470964	0.0931707	0.184559	0.114397	-0.449455	0.157863	0.993468	1.14265	0.682588	0.174083	-0.116604	0.243374	0.388462	1.41498	0.0865826	-1.46635	-0.80994	-1.17569	1.59418	1.50388	-0.363721	-1.11837
ENSG00000111716	P07195	3945	LDHB	0.839964	1.62353	1.57443	-1.14316	-0.497937	-0.0143318	1.73971	1.08604	0.645352	1.08074	-0.202882	-0.68187	-0.421716	0.160018	0.103017	0.0137573	-0.56324	-1.30977	0.048842	0.141786	0.212847	-1.70426	-1.80137	-0.929495	1.44394	1.3029	1.46537	0.556166	-0.566477	-0.115993	1.1297	0.793087	1.36491	0.241593	0.0703687	0.518343	-0.36187	0.321162	-0.083328	-0.843069	-0.906577	-0.758289	0.0580996	0.11424	-0.349087	-1.78295
ENSG00000277586	P07196	4747	NEFL	-0.270157	-0.913074	-1.57213	2.23739	0.704201	1.01078	-0.0902455	-1.05364	-1.2005	0.270133	-0.651255	-0.290563	-0.379223	-0.892554	-1.04488	1.07184	1.03226	0.367177	-0.27942	-0.56043	-0.982416	0.871934	1.44819	1.16658	0.511484	0.576075	-0.453301	1.81664	1.85686	1.87729	-0.415128	-0.883397	-1.01194	0.0153475	-0.698781	-0.277854	-1.19113	-1.19113	-1.14623	0.698682	0.877064	0.794182	-0.718017	-1.01194	-1.08694	0.557302
ENSG00000104722	P07197	4741	NEFM	-0.604334	-1.44152	-0.783654	1.95189	1.27887	1.28492	-0.446586	-1.48827	-0.686878	0.354749	-0.591094	0.204685	-0.637686	-1.0678	-0.668996	1.35083	0.831422	0.697469	-0.542102	-1.10506	-0.630712	0.82961	1.05638	0.853865	0.544326	0.35043	-0.898627	1.30909	1.29529	1.39021	-0.468885	-0.437949	-0.453061	0.0393316	-0.437949	-0.0623413	-0.992305	-1.34728	-1.45768	1.30322	0.962378	1.34657	-1.16809	-1.07069	-1.5423	0.743475
ENSG00000125817	P07199	1059	CENPB	0.592993	-0.341009	-0.232975	-0.908358	-1.88939	-0.795742	0.20199	1.3693	2.00161	-0.840274	-1.55448	-0.188006	1.08362	0.511072	0.703716	-0.639397	-0.604968	-0.678629	1.01505	1.48617	1.08703	-0.356377	-0.769123	-0.253812	-0.561947	-0.453554	0.0157473	0.026185	-2.09201	-1.20256	0.187485	0.183385	-0.374731	0.572789	1.25774	-0.0555476	-1.548	-1.32271	-1.10757	1.12924	0.0885616	0.364095	1.80944	1.09776	-0.606562	0.940587
ENSG00000185624	P07237	5034	P4HB	0.402266	1.23538	1.33133	-0.486638	-0.726689	-0.545686	0.933717	0.131012	0.0889607	-0.631579	-0.832781	-1.67166	1.07399	1.98203	0.410132	-1.24245	-1.53101	-1.03032	0.488846	1.00978	0.891873	-1.01674	0.298943	-0.562708	0.35506	0.413132	0.478113	-0.737787	-0.871559	-0.703101	-0.21677	-0.0358168	0.200496	-0.776085	-0.870459	-0.768428	2.26865	0.101015	2.17068	0.0893274	-1.1837	0.0793397	-0.0142546	-0.198196	2.15592	-0.90298
ENSG00000182718	P07355	302	ANXA2	1.32861	1.96326	0.339028	1.12993	-1.33745	-1.19706	-0.261133	-0.753914	0.534332	-0.962067	-1.4196	-0.845582	1.03891	-0.478664	0.576968	-0.59782	-1.0724	-0.332276	-0.810441	0.911501	0.072698	0.214933	1.83744	0.120795	1.52365	1.9108	1.92159	0.814018	0.329228	0.0352013	0.414968	0.00913001	0.789611	-0.500842	-1.51549	-1.45583	0.633511	0.218114	-0.277375	-0.844915	-0.794808	-1.2084	-0.0598388	-0.180084	0.523616	0.299688
ENSG00000014216	P07384	823	CAPN1	-1.97577	0.160239	-1.529	-0.875313	-1.86273	-0.821568	0.235718	-0.892177	-0.668329	0.400515	0.28592	0.242695	0.450018	0.174354	0.791925	-0.337439	-0.743638	0.514159	1.8675	1.22683	1.46362	0.599896	0.421228	0.871331	-2.25516	-1.76984	-1.19709	0.0572587	0.109787	1.02541	-1.18213	-0.436842	-1.24094	1.33285	1.43459	0.467552	0.254309	-0.22713	0.334877	0.380522	1.54077	0.372062	-0.752202	-0.226606	0.292308	0.0920398
ENSG00000197746	P07602	5660	PSAP	-2.30613	-1.14177	-1.6768	0.120427	1.15714	0.231117	-0.347727	-1.11199	-0.925446	0.797196	0.0853901	0.150007	-0.468181	-0.431882	-0.60614	1.0103	0.472759	0.526124	0.135507	0.0728058	-0.229888	1.21643	1.83676	1.43399	-1.93034	-1.49252	-1.31356	0.852821	1.23405	1.04999	-1.12754	-0.834456	-1.42321	0.791967	0.790552	0.211388	0.1265	0.49945	1.18216	-0.601676	-0.397651	-0.538646	0.769735	0.296182	1.78331	0.498507
ENSG00000108518	P07737	5216	PFN1	0.307244	1.03563	1.10112	-2.16726	-1.7215	-1.14009	0.725853	1.06295	0.806368	-0.716092	-0.909867	-0.901967	0.695652	0.363308	1.02178	-0.805925	-0.584102	-0.461485	1.12479	0.772762	1.44324	-0.388215	-0.429371	-0.234814	1.23273	1.00642	0.869266	-0.278697	-1.43315	-0.378022	1.35452	1.26359	1.40493	-0.0127691	-0.235565	0.0835451	-0.745873	1.7893	-0.243799	-1.44806	-0.491922	-1.20037	0.533632	0.567104	-0.636313	-0.54539
ENSG00000213930	P07902	2592	GALT	0.324892	2.33057	1.07513	-0.111559	0.348806	-1.21518	0.851862	2.16473	-0.77384	0.0861937	0.778688	-0.608998	0.320246	0.570932	0.508212	0.000673084	-0.21185	-0.604856	-0.660312	-1.5199	-0.471052	-0.981675	-0.748739	-1.45297	-0.0955165	0.62337	0.512872	0.989951	2.07225	1.62868	0.207931	0.0640636	-0.0261236	0.036159	-0.0512447	-0.201075	-0.00262173	-0.13154	-0.156782	0.585991	0.331465	1.03607	-1.87687	-2.38723	-1.6415	-0.613523
ENSG00000173660	P07919	7388	UQCRH	-0.273045	-0.618073	1.11852	-0.224439	0.288219	-0.756663	-1.65515	0.290456	-1.31576	-0.246804	1.14485	0.434843	-0.473185	-1.17686	-0.949462	1.1924	0.992732	1.54823	-0.641837	-0.202547	-0.94906	2.00444	1.14918	-0.680991	0.227701	0.177699	0.092042	2.04956	0.876063	0.930256	0.262616	-0.264123	-0.0671798	1.30228	1.30874	1.44572	-1.05126	-0.533533	-2.2584	-0.272427	0.353378	0.354055	-0.625809	-0.781678	-1.36355	-0.678605
ENSG00000198467	P07951	7169	TPM2	0.317697	0.596555	0.503613	-0.667106	-0.489933	-0.38888	0.289181	-0.361327	-0.15583	-1.45733	-2.12917	-1.84026	1.07044	-0.00676637	0.722147	-1.0405	-0.83751	-0.236676	1.45153	1.76711	1.16978	0.390608	0.778229	0.554386	-0.367255	0.244346	-0.157006	-1.25716	-2.15499	-1.85492	0.0114021	-0.132326	-0.278251	-1.14941	-1.09927	-1.47639	0.865081	0.773808	0.949769	0.984536	0.817023	1.18349	0.266852	0.753805	0.661345	0.761478
ENSG00000091483	P07954	2271	FH	-0.600057	-0.401801	0.240195	0.979873	-0.372833	0.420077	0.456655	-0.102357	-0.317428	2.1902	1.45202	0.740968	-0.138869	-1.86436	-1.05947	1.81226	0.434428	0.457447	-1.29987	-1.00329	-1.25895	0.367202	-0.481181	-0.650851	0.927362	0.747975	0.6758	1.20594	0.337232	0.99244	0.870749	1.1776	0.558231	0.263213	0.647419	1.67031	-1.48264	0.372558	-1.77049	-0.800395	-0.52955	-0.626246	-0.658684	-1.05789	-1.1858	-0.0686582
ENSG00000137801	P07996	7057	THBS1	-1.53813	-0.534325	-0.118213	-1.03578	-0.690948	-0.701221	-1.13147	-0.255142	-0.251941	-0.922349	-0.169681	-0.0633817	-0.872932	0.517257	0.181066	-0.561823	1.1222	1.02393	-0.364061	0.103729	0.35422	1.52995	1.94758	2.43146	-0.718185	-0.563948	-1.26	-1.4687	-1.61582	-0.934737	-0.428592	0.150814	-0.657081	-0.805103	-0.7166	-0.747241	0.876215	-0.770574	0.850402	0.9374	0.591568	0.848996	0.419289	0.652195	0.770543	1.59927
ENSG00000185591	P08047	6667	SP1	0.973866	0.489733	0.601518	-0.747573	-1.25795	-0.179129	1.23522	0.969226	1.61589	-0.818986	-1.42801	-0.665244	0.885729	0.878058	0.853886	-1.16767	-1.49021	-1.03869	0.605364	0.738485	1.16218	-0.429199	-1.063	-0.723486	1.13173	1.03194	1.20074	-0.84229	-0.89282	-0.823536	0.645662	0.802286	0.907848	-1.26237	-1.37407	-1.04413	1.24923	0.727777	0.876819	-0.558055	-0.561893	-1.04906	1.19058	0.96978	0.674949	-0.665422
ENSG00000197043	P08133	309	ANXA6	-0.118915	0.728723	0.433966	-1.31505	-1.79269	-1.22711	0.446234	0.954453	0.478379	-1.43564	-1.12313	-1.11581	0.892545	1.20952	0.742808	-1.21026	-0.561011	-0.438593	1.13312	1.29874	1.02706	0.0461453	1.04438	-0.097857	-0.419147	-0.499262	0.733335	-1.4481	-1.22617	-1.17959	0.725552	0.825713	0.443683	-1.31701	-0.800111	-1.04633	1.45203	1.93061	1.47475	-0.511226	-0.133199	-0.0242962	0.509048	1.21886	0.900798	-0.516447
ENSG00000155366	P08134	389	RHOC	-1.14374	-0.869713	-0.910389	-0.996693	-0.749457	-0.348321	0.750767	-0.361518	0.979334	-1.19907	-0.783476	0.1606	0.855975	1.24113	1.02935	-0.693432	-0.467351	-0.110983	1.06501	1.5747	1.51812	-1.93589	0.60864	0.786414	0.798306	0.767241	0.856301	-1.14567	-1.32446	-1.23666	0.919914	0.75009	0.555972	-1.90234	-1.52348	-1.9216	0.603373	1.3542	0.32169	-0.081511	0.124768	-0.281688	1.25091	0.848667	0.346165	0.279518
ENSG00000152556	P08237	5213	PFKM	-0.825254	-0.895286	-2.1636	0.0150912	-0.035591	0.182347	-0.692306	-1.10246	-1.33187	1.32928	1.25405	0.508195	0.526025	-0.82046	-0.0996769	1.10881	1.14895	0.64147	-1.09885	-0.963927	0.0191637	1.07458	0.944215	1.2771	-0.925832	-1.274	-1.28686	0.490304	0.571793	0.756112	-1.10338	-0.590028	-1.12749	1.03531	1.83566	1.61407	-0.00344223	-0.971721	-0.646366	1.73646	0.221399	1.17762	-1.15753	-0.397929	-0.585462	0.0224921
ENSG00000096384	P08238	3326	HSP90AB1	0.706796	1.49269	0.911488	0.0950935	-0.2017	1.50293	1.01924	-0.552153	2.0723	1.20275	-0.571719	0.38801	-0.45898	-0.207733	-0.040175	-0.542974	-1.39878	-1.0088	-0.575638	0.0538749	0.230854	-1.36924	-1.31187	-1.43627	0.695926	1.14593	0.388052	1.51379	0.0746726	0.933944	-0.135474	-0.304069	0.279365	1.55874	1.08101	1.68502	-0.834493	-1.02452	-1.49619	0.395713	-0.0180239	0.0794272	-1.19018	-1.32851	-1.65823	-0.438661
ENSG00000182934	P08240	6734	SRPRA	1.62325	1.62126	1.54992	0.324662	0.134192	-0.773821	0.921937	0.964212	0.145956	-0.463463	0.443003	-1.14507	0.909542	0.479308	0.179213	-0.264894	-0.150593	-1.42349	-0.12628	-0.165876	-0.0633955	-1.34034	-1.28529	-2.09395	-0.380582	-0.868612	-0.829499	-0.714643	0.467719	-0.393581	-0.422809	-0.814833	-0.681302	-1.24599	-1.10144	-0.864245	1.70766	0.362434	2.31771	0.0593484	-0.321532	-0.111514	0.359948	-0.157856	2.51995	0.203704
ENSG00000102003	P08247	6855	SYP	-1.01304	-0.114245	-1.62507	1.02322	0.382516	0.796244	-1.0428	-0.104927	-1.70808	1.56491	1.21122	0.8992	-0.801985	-0.341253	-1.02816	1.00849	0.887405	0.737436	-0.979529	-0.368715	-1.35812	0.919263	0.178463	0.877548	-1.33376	-1.72954	-1.63917	1.21756	0.948414	0.939853	-0.797854	-0.52894	-0.844813	1.32736	1.21913	1.31111	-0.631185	-0.893708	-0.402788	0.741896	0.60806	0.714636	-0.838441	-0.838441	-0.472822	0.764693
ENSG00000256269	P08397	3145	HMBS	0.155781	1.5134	1.11263	-0.28459	-1.09762	-0.973467	1.52622	1.68984	0.856935	0.717431	0.647568	0.120901	-0.253411	0.857965	-0.0922654	0.363167	0.490563	-0.330722	-0.878938	-0.835869	-0.773929	-1.81161	-1.31474	-1.40523	0.82421	0.263457	1.01512	0.390133	-1.36736	1.04775	0.816034	-0.363451	1.2999	0.82421	1.08918	0.631171	-0.670079	-0.18264	-2.42215	0.994131	0.312104	-0.270501	-1.0832	0.702891	-1.5413	-0.718441
ENSG00000131828	P08559	5160	PDHA1	0.0826579	-0.776623	0.369274	0.574045	0.425457	-0.671613	-0.45547	-0.0419755	-1.47704	1.06528	1.88966	0.85933	-0.392487	-1.5258	-0.901495	1.83182	0.740534	1.19487	-0.933754	-0.863824	-1.4098	0.875577	0.190926	-0.649549	-0.962422	-1.03932	-1.0046	1.71359	1.21033	1.20589	-0.715812	-1.49747	-0.144058	0.979614	0.880731	0.897272	-1.72825	-0.705634	-0.260036	0.637412	0.911904	0.588398	-1.45908	-0.71622	-0.166703	0.873225
ENSG00000141905	P08651	4782	NFIC	-1.42803	-0.778474	-1.17293	-1.72617	-1.02465	-1.08578	-0.176415	0.444768	-0.202025	-0.543199	-0.667426	-0.850307	1.01492	1.19199	0.942159	-0.715501	0.260134	0.0458965	1.83035	1.285	1.22395	0.96835	0.620381	0.54301	-1.3215	-1.03521	-0.855836	-1.72772	-1.62921	-1.40969	-0.0723688	0.228396	-0.281749	-0.314661	-0.45905	-0.664394	1.1168	1.36348	0.776922	0.325924	0.110519	0.243567	1.36241	1.79055	1.19378	0.442302
ENSG00000026025	P08670	7431	VIM	0.989236	0.917748	0.918358	-0.666092	-1.30184	-0.907047	0.894528	1.22016	0.887225	-0.786945	-1.3928	-0.918376	1.22069	1.29784	1.02745	-0.992317	-1.07231	-0.93376	0.652427	0.586847	0.861187	-0.858923	-0.648988	-0.9943	1.09779	1.29551	1.17082	-0.940676	-0.805227	-0.712313	1.14078	1.12696	1.13909	-1.02042	-1.10016	-0.881524	0.95662	1.12756	0.772984	-0.605657	-0.519752	-0.395331	0.445074	0.144204	0.602972	-1.26381
ENSG00000182774	P08708	6218	RPS17	-1.17658	0.373349	-0.0782626	1.11513	0.286363	0.841827	1.49893	-0.437409	0.959993	2.62765	-0.561163	0.222038	-0.651194	-0.18835	0.354797	-0.417536	-0.449234	-0.353222	-0.969471	-0.132747	0.562351	-2.39953	-0.798065	-0.229664	1.18317	1.82114	0.822568	-1.19957	-1.99973	-1.29798	1.64136	1.15356	1.27787	0.265831	0.491051	0.413002	-0.242936	0.178553	-0.249609	-0.304225	-0.754315	0.00901985	-0.15323	-0.173488	-0.00733181	-1.05304
ENSG00000164111	P08758	308	ANXA5	0.394983	0.660051	0.684863	-1.28622	-1.1827	-0.803053	0.689967	0.802052	0.699639	-1.37064	-1.40782	-1.21484	0.924378	1.00464	0.899832	-1.30755	-1.00637	-0.806212	1.12362	1.29379	1.36729	-0.471399	0.450287	-0.138597	0.861714	0.911518	1.05274	-0.942063	-0.671569	-0.641631	0.858596	0.860227	0.871673	-2.01297	-1.52266	-1.08679	0.876463	0.924405	1.02271	-0.870536	-0.915575	-0.633942	1.04875	0.887824	0.969441	-0.384537
ENSG00000168028	P08865	3921	RPSA	1.3395	2.5212	1.93166	-1.0924	-1.01918	-0.82069	0.185288	0.77643	0.0928578	-0.522951	0.608853	-0.876006	0.20563	-0.406569	-0.470378	0.751002	0.368887	-0.133867	-0.114044	-0.557351	-0.858189	0.711303	-1.25005	-1.37093	1.54801	1.88718	1.66609	-0.330357	-1.32052	-0.501574	1.1545	0.766387	1.26287	0.436416	0.546179	0.489424	-0.613642	-0.536015	-0.750017	-0.0619598	-0.580713	0.163374	-0.320448	-0.994918	-0.553972	-1.10485
ENSG00000150594	P08913	150	ADRA2A	-0.570814	1.0161	0.933968	-0.400253	-0.935266	-1.09114	-0.740707	-0.601295	-0.187384	1.17986	-0.307467	1.09875	-1.5785	-0.191954	-0.845099	1.12927	0.480564	1.92702	-0.71688	-0.602842	-1.24847	1.95996	-0.100876	0.393452	-0.725394	-0.687088	0.351701	-1.35721	-1.4512	-1.54501	-1.46797	-0.650702	-1.04594	0.474059	0.709093	0.292054	0.0977057	-0.139756	0.288828	1.30102	1.32435	1.16535	-0.928624	-0.207146	0.291885	1.11361
ENSG00000135404	P08962	967	CD63	0.794266	0.739136	2.08397	-0.542929	-0.862155	-1.23408	-0.364569	-0.329354	-0.830912	-1.17939	-1.01731	-1.63617	1.5975	0.15217	0.421636	-0.569272	-0.637375	0.711334	0.764242	0.651126	-0.0622025	1.59972	0.679285	-0.928672	0.154365	0.34036	1.06474	-0.234954	-0.902475	-0.243451	1.06155	0.843483	0.779484	-1.4723	-1.88203	-0.790777	0.400228	1.14456	1.18399	-1.3658	-0.394081	-0.53805	0.925702	0.307436	1.92362	-0.268531
ENSG00000077312	P09012	6626	SNRPA	-0.864969	-1.19355	-0.214194	1.18596	0.956299	0.756477	2.10072	0.253458	1.63744	0.939606	-1.15216	-1.01456	-0.181104	1.11116	0.181402	-0.888545	-0.251886	-0.161408	-0.837625	-0.0747916	-0.0345555	-2.1149	-0.313886	0.175623	1.52854	1.47871	1.79903	-0.677711	-1.6231	-1.35146	1.26591	1.05889	0.989973	-0.896564	-0.820514	-0.966039	0.01665	1.18485	-0.0262599	-1.02635	-0.414426	-0.370691	0.356173	0.396892	-0.0887863	-0.547193
ENSG00000138685	P09038	2247	FGF2	1.39891	1.4793	1.48549	-0.66175	-0.0257742	-1.10941	1.18088	1.93545	0.0162842	-1.3901	-0.612832	-1.26546	1.11748	0.740668	0.450527	-1.05317	-0.636623	-0.410402	0.0955444	-0.379797	0.0802336	-0.961631	-0.543455	-0.930354	1.13248	1.07037	1.34367	-0.4431	0.053286	0.00250706	0.923178	0.827466	0.974279	-1.62286	-1.59535	-1.67985	0.865457	0.856729	0.936364	-0.729089	-1.20934	-0.664911	0.501333	0.210499	0.804811	-0.776153
ENSG00000111674	P09104	2026	ENO2	-1.58489	-1.39822	-1.78547	0.481459	0.769801	0.864736	-1.2578	-1.17875	-0.87722	0.516998	0.721558	0.795647	-0.687366	-0.0071256	-0.496886	0.919169	1.08948	0.411376	-0.419764	-0.565148	-0.11078	0.955585	1.08537	1.75825	-0.831458	-0.24694	-0.683581	1.48863	1.54523	1.42187	-1.24135	-0.857593	-1.21632	1.15563	1.04947	1.10361	-1.23062	-0.441059	-1.13476	0.137244	0.762339	0.205522	-0.783473	-0.473212	-1.29881	1.05441
ENSG00000060971	P09110	30	ACAA1	-0.784254	1.77956	0.406233	0.477304	-0.833498	0.0797025	1.26444	0.602466	1.6538	0.782485	-0.810554	-0.171733	-0.246881	0.564325	0.712846	0.628803	0.17779	-0.348387	-0.19594	-0.346254	0.112443	-1.71886	-2.34068	-1.44515	-1.15669	-2.6442	-1.82319	0.540855	-0.158391	1.30522	-0.98748	-0.447286	0.0161982	0.587166	0.627299	0.804727	-0.752517	0.278392	-0.275027	1.02423	1.25275	0.7306	-1.04191	0.0428349	0.0757414	0.998396
ENSG00000084207	P09211	2950	GSTP1	1.177	1.32271	0.651222	-2.72964	-1.4129	-0.909982	-0.608364	0.386692	0.394812	-1.50195	-0.785617	-0.81256	0.627677	-0.0269838	0.456352	-0.453568	-0.243885	-0.119649	0.789218	0.408066	1.08112	1.18191	0.360667	0.767652	0.987164	0.59082	1.31973	-1.09807	-2.09423	-1.4006	1.42883	1.13149	1.20346	-0.0139325	-0.0863215	-0.137168	-0.0818274	0.989606	-0.0826735	-1.39873	-0.165121	-1.00314	1.15585	0.486806	0.080869	0.0967893
ENSG00000100097	P09382	3956	LGALS1	-1.08993	-0.937155	-0.747476	-0.276698	-1.02498	-0.658114	-1.10523	-0.92242	-0.364967	-0.896338	-0.878498	-0.237312	0.592785	0.134228	0.196178	-0.695919	-0.306588	0.427051	1.42022	2.09252	1.56674	0.902335	1.71924	1.09033	0.456788	-0.4802	0.0986728	-0.0662861	-1.21597	-0.980795	0.223253	0.0173232	-0.0194835	0.0219219	-1.10812	-1.12542	0.368582	1.03118	0.285932	-0.772431	0.20689	-1.34964	2.30574	2.18091	0.669886	1.10692
ENSG00000151552	P09417	5860	QDPR	-1.32636	-0.787558	-1.02117	-1.54668	-1.55732	-1.1554	-0.530434	-0.060646	-0.429676	0.410978	0.434481	0.421594	2.05493	0.1098	1.27816	1.04794	0.212951	-0.018313	-0.627394	-0.007741	2.17055	0.28502	0.233334	0.408979	-1.20624	-0.391398	-0.0776455	-0.329667	0.0138668	-0.0286562	0.479139	0.0884936	-0.783174	2.67609	2.19873	1.7955	-0.436296	-0.0564461	-1.03602	-0.0632161	0.126429	-0.131639	0.303364	-0.266303	-1.83334	-0.30056
ENSG00000087258	P09471	2775	GNAO1	-1.36104	-0.963931	-1.59114	1.02434	0.756038	1.05351	-0.741381	-0.525402	-0.322347	0.0523935	1.43209	0.701577	-0.970295	-0.765604	-1.13635	0.951187	0.655416	0.443466	-0.798398	-0.756496	-0.967463	1.19573	1.10984	1.52426	-1.21402	-1.17399	-1.12062	1.22287	0.904309	1.21707	-0.922206	-0.751623	-1.02118	1.26495	1.26388	1.21106	-0.624718	-0.61287	-0.664615	0.886709	0.75262	0.852831	-1.37365	-0.876128	-0.979205	0.441867
ENSG00000113140	P09486	6678	SPARC	0.997344	1.57982	0.612121	-1.06192	-0.881299	0.391102	0.5335	0.666786	2.22923	-1.51506	-0.6851	-1.2262	0.246319	0.762328	0.494292	-1.34141	-0.565316	-1.84004	-0.156216	0.475003	0.537568	-0.0515636	0.180131	-0.381408	0.779602	1.21993	1.44625	-0.839349	-1.79779	0.314159	1.23065	0.900713	0.943343	-0.841323	-1.42335	-0.892938	0.760637	0.892768	0.550836	-0.419382	-0.548039	-0.45142	0.454532	0.19742	0.436548	0.245599
ENSG00000134184	P09488	2944	GSTM1	1.36312	1.39856	1.10912	-1.50596	-1.35093	-0.419063	1.10178	1.41456	0.852415	-1.35161	-0.777538	-0.535187	0.869222	0.921982	0.713523	-1.0908	-0.678513	-0.658397	0.166803	0.0294686	0.763413	-1.28443	-0.438116	-0.613416	1.03591	0.978086	1.50091	-0.839472	-1.54555	-1.76825	1.23189	0.946953	1.31591	-0.0582922	-0.5115	-0.985077	0.386754	1.24098	0.631708	-0.749202	-0.743003	-0.451679	0.819337	0.368938	-0.254543	-0.208884
ENSG00000140416	P09493	7168	TPM1	1.09685	3.05838	1.80645	0.629661	-0.176183	-0.542229	-0.46292	0.408506	-1.10773	-0.389305	-0.107919	-1.20743	0.19289	-0.75046	-0.734294	-0.0929148	0.13483	-0.288165	-1.01903	-0.630528	-0.975865	1.23798	0.12643	-0.206993	0.366299	0.159996	0.540427	1.25891	1.5091	0.2849	-0.578546	-0.522702	-0.201804	-0.37192	-0.471692	-0.537986	-0.917271	-0.964718	-1.23095	1.15462	0.71461	1.10669	-2.33159	-1.44951	-0.35989	0.326741
ENSG00000122705	P09496	1211	CLTA	-1.00509	-1.26371	-1.11279	0.206213	1.05971	1.16232	-1.27489	-1.09708	-1.33836	0.0588529	1.45318	0.779145	-0.432042	-0.765606	-0.592734	1.13393	0.868875	0.785229	-0.676217	-0.473203	-0.785893	1.71601	0.798379	0.795771	-1.12831	-1.24626	-0.567342	1.24149	0.329127	1.3856	-0.368307	-0.646951	-0.948536	2.00801	1.05126	1.24411	-1.3846	-0.836548	0.0714276	-0.251453	0.777316	0.44644	-0.803931	-1.81692	0.147246	0.346358
ENSG00000175416	P09497	1212	CLTB	-1.40324	-1.65337	-1.26037	1.22938	1.41082	1.41623	-0.456389	-1.86925	-0.699907	1.59938	0.279229	0.849594	-0.683533	-0.4817	-0.42652	0.766772	-0.191792	0.528306	-0.413254	-0.294466	-0.0908791	0.0931158	0.706596	1.04524	-1.19686	-1.05613	-1.33734	1.39733	0.919554	1.29215	-0.879656	-1.09083	-0.826348	1.46016	1.39043	1.29976	-1.09575	-1.06641	-1.14376	0.53814	0.471315	0.660547	-0.419858	-0.429033	-0.313401	0.589796
ENSG00000173786	P09543	1267	CNP	0.269009	-0.0299881	0.201972	-0.587449	-0.592338	-0.932675	0.906136	0.196819	0.505604	-0.917275	-1.85762	-1.14196	0.966226	0.862826	0.860664	-0.821722	-1.48014	-0.796455	1.30925	1.81887	1.845	-0.503187	0.015213	-0.0967786	0.673986	-0.144815	1.36035	-0.499217	-0.321248	-0.462908	0.445521	0.948098	0.761655	-1.06201	-1.21748	-0.835351	-0.00901075	1.54672	-0.526692	-0.90109	-0.408385	-1.01429	2.16647	1.93798	-0.939573	-0.273818
ENSG00000135486	P09651	3178	HNRNPA1	-2.03322	-1.53672	-0.830494	0.851734	0.745858	1.68291	0.469844	-0.371902	1.7085	0.937436	-0.359436	0.832777	-0.825134	-0.59548	0.352049	-0.408784	-0.0213412	0.471082	-0.764217	-0.170261	0.542057	-1.71709	-0.103192	1.14304	1.17469	1.14681	1.49278	-1.62583	-1.80179	-1.64739	0.736776	0.584633	1.02893	-1.0408	-1.04746	-0.545442	0.726435	0.68339	0.736374	-0.530202	-0.191558	-0.558479	0.791697	0.716474	0.873294	-0.550173
ENSG00000164919	P09669	1345	COX6C	-1.90481	-0.661331	-0.770592	0.93494	1.1248	1.56256	-0.418695	-1.5102	0.0839658	0.339139	-1.30867	-0.224766	-0.484146	-0.3111	-0.297063	-0.162708	-0.630355	-0.406738	0.209903	1.65249	1.65152	-0.653462	0.877432	1.30788	-0.201222	-0.49215	-0.473083	1.52064	0.835939	1.20839	-0.0690777	0.155763	0.0342766	1.31644	1.62969	1.36104	-1.14692	-0.246736	-2.2242	-0.0924639	0.541189	-0.362787	-0.496459	0.0639237	-2.03576	0.113589
ENSG00000143799	P09874	142	PARP1	1.13245	1.24225	1.52332	-1.45298	-1.23517	-1.2551	0.884784	1.54535	0.247351	-0.915747	-0.670235	-1.43718	1.09738	0.522532	0.641204	-0.861027	-0.318313	-0.375454	0.880486	0.61321	0.434902	-0.459115	-1.03408	-0.750821	1.41805	1.22781	1.51512	-0.622682	-1.70787	-1.27799	1.20314	1.26998	1.06033	-0.505605	-0.560287	0.0659354	0.0358757	0.636958	-0.494996	-0.668488	-0.986463	-0.679107	1.00081	1.16953	-1.14418	-0.681983
ENSG00000101868	P09884	5422	POLA1	1.21513	0.914508	1.1872	-0.949713	-1.02651	-0.840652	0.83104	0.858607	0.957466	-0.929001	-1.04618	-1.06031	0.930883	0.627608	0.934839	-0.977979	-0.872964	-0.978238	1.10833	1.06218	1.02179	-0.854502	-0.970967	-1.14258	1.51597	1.17473	1.38293	-0.644695	-1.03111	-0.833731	1.2193	1.10329	1.15234	-0.742177	-1.44435	-0.663079	0.296071	1.05387	-0.175858	-0.84099	-0.994735	-1.01754	1.00956	1.12199	-0.359296	-0.879022
ENSG00000154277	P09936	7345	UCHL1	-1.07455	-0.830592	-0.986099	0.663174	0.991598	0.782654	-0.819818	-0.907102	-1.02747	0.835846	0.92628	0.639445	-0.849545	-0.546417	-0.760078	1.67686	1.17922	1.04892	-1.06417	-1.1409	-1.3768	1.10773	0.783756	0.748052	-0.65611	-1.13234	-0.962242	1.14847	0.961853	1.12167	-0.785564	-0.895849	-1.11808	0.914481	1.07335	0.842735	-0.389415	-0.33032	-0.0484237	0.843034	1.07756	0.814704	-1.909	-1.8854	-0.544299	0.651531
ENSG00000111144	P09960	4048	LTA4H	0.865552	2.50443	1.54222	-0.265142	0.652299	-0.670453	0.429695	1.42609	-0.881893	-0.625059	-1.167	-2.14168	0.500551	0.403343	0.36252	-0.949226	-0.000187233	-0.813741	-0.837678	-0.439741	0.285841	0.313611	-0.162921	-0.331441	1.13009	1.79916	1.60841	-1.03761	-0.526793	-1.04083	1.04698	1.10334	1.12176	-1.19689	-1.35427	-1.23899	0.734396	1.18387	0.392237	-0.975303	-0.720157	-0.732703	-0.1724	0.158537	0.296692	-0.447295
ENSG00000236609	P0CG23	54753	ZNF853	-1.26455	-2.07777	-1.67364	-0.522921	-0.366637	0.063616	-1.0008	-0.973319	0.568212	0.0368528	-0.701446	-0.0895312	-0.248457	-0.100245	0.727204	0.288252	0.634534	0.790653	0.219392	-0.173843	0.86183	2.03658	1.3865	1.57954	-0.998515	-1.45584	-1.09498	0.332368	0.119625	0.224488	-0.530255	-1.91057	-0.465546	-0.247009	-0.564493	-0.834121	0.269507	-0.880532	1.01189	1.42054	0.862306	1.20523	-0.125543	-0.548901	0.282669	2.1446
ENSG00000189339	P0CK96	728661	SLC35E2B	-0.723549	0.337851	0.536485	0.840707	1.14472	0.187997	-1.50198	-0.463746	-2.31776	0.0219529	0.95971	-0.178327	-0.961877	-0.769529	-0.689192	1.01787	0.5712	1.62268	-0.344359	-0.563297	-1.22329	1.73474	0.32277	0.438225	-1.46098	-2.00243	-1.37086	1.11355	1.49749	1.10979	-1.29009	-0.991486	-1.1004	0.501166	0.881959	0.655151	-0.216725	-0.651708	-0.380155	0.771042	0.38351	0.910345	-0.766233	-0.117829	0.0213051	0.62063
ENSG00000235961	P0CW24	84968	PNMA6A	-1.22511	-0.917067	-0.855668	1.13838	1.02483	0.728597	-1.22463	-0.767694	-1.03472	0.170938	0.869195	0.905156	-0.726462	-0.544366	-0.765337	1.01061	1.68678	0.574671	-0.933101	-0.373424	-1.6305	0.66935	1.33179	0.887789	-1.2484	-1.9807	-1.39285	0.188351	0.123785	1.25162	-0.705425	-0.286985	-0.741466	1.12233	1.11948	-0.0575921	-0.835118	-0.310767	0.399471	0.410537	0.705319	1.15487	-1.56774	-0.722001	-0.216842	1.30942
ENSG00000224531	P0DJ93	221710	SMIM13	-1.59262	-1.57812	-1.88086	1.28499	1.27205	0.497556	0.144867	-0.817251	-0.249661	1.68413	1.21631	0.633784	-0.378178	-0.208884	-0.561243	0.678638	1.02514	0.729807	-0.332226	-0.950856	-0.982433	-0.640972	0.56503	0.441011	-1.07417	-1.44512	-0.833811	1.56732	1.3343	1.25898	-0.877621	-0.287129	-0.742028	1.11261	1.34734	1.32616	-0.611708	-0.76427	-0.738076	1.07067	0.655702	0.727807	-0.937501	-0.929833	-1.23664	0.235018
ENSG00000143933	P0DP24	805	CALM2	-1.22248	-1.57475	-2.03993	0.851781	0.695626	0.647817	-0.673281	-1.15632	-0.828215	1.50764	1.5722	0.795197	-0.534365	-0.528135	-0.390387	1.44673	0.550932	0.762764	-0.0392026	-0.764572	-0.4265	0.78217	0.0115104	0.553776	-0.679514	-1.44454	-1.12027	1.45248	1.57312	1.49527	-0.863209	-0.457675	-0.867428	1.43521	1.44322	1.32382	-1.29472	-0.238854	-1.04888	-0.307466	0.350407	-0.250282	0.157373	-0.0293475	-1.04412	0.380115
ENSG00000074047	P10070	2736	GLI2	1.06994	1.11995	1.2529	-1.21589	-1.51736	-0.993401	1.26727	0.611665	0.622605	-1.24075	-1.16512	-0.896217	1.11849	0.508146	0.727813	-0.703177	-0.769534	-0.413989	1.40288	0.656442	0.812513	-0.452287	-0.971471	-0.831409	0.877379	1.32537	1.51997	-0.997959	-1.22761	-1.00943	0.986504	0.834431	0.996029	-1.0817	-1.11154	-0.997959	0.815275	1.07329	0.646378	-1.0651	-0.443227	-0.914816	0.865146	1.03796	0.400933	-0.874462
ENSG00000137714	P10109	2230	FDX1	1.94774	1.59584	1.40205	-0.879083	-1.47803	-1.24363	-0.533815	1.76831	-0.41344	-0.801654	-0.0571172	-0.996791	1.4499	-0.588252	0.0937546	-0.472507	0.461755	-0.0850539	0.0891922	-0.761202	0.199319	0.481287	-1.09604	-0.0825281	0.815173	0.988012	0.931319	-1.52008	-1.7224	-1.46155	1.50632	0.968394	0.622775	-0.536792	-0.752572	-0.72488	0.568213	0.587404	1.16457	-0.393829	-0.86963	-0.88608	0.697795	0.671182	0.873715	-0.375905
ENSG00000125249	P10114	5911	RAP2A	-0.0962309	0.437371	0.346786	-1.04789	-1.45936	-1.98452	-0.35687	0.593732	-1.58417	-0.546858	0.630935	-0.892172	0.58242	-0.472658	-0.685252	1.42442	1.37868	0.510752	0.21918	0.295176	-0.294289	2.28149	0.606644	0.112687	-1.16433	-1.46972	-1.25663	-0.397098	-1.33994	-0.996605	-0.834373	-0.392978	-0.763528	1.5835	1.68584	1.47654	-0.0860477	-0.52717	-0.455141	1.20291	1.21277	1.01418	0.100571	0.0738802	-0.558833	0.698965
ENSG00000116747	P10155	6738	RO60	-0.0709405	1.38274	0.137905	-0.958669	0.546784	-0.156381	0.646679	1.37104	0.321451	-0.992634	-0.525856	-1.49669	1.0167	1.51966	0.843008	-0.962116	-0.912913	-1.50752	0.737743	0.89414	1.16309	-0.926787	-0.776272	-1.29416	0.094312	0.88782	-0.213829	-0.759877	-0.482832	-1.19472	-0.793475	-1.27657	0.821488	-1.37126	-0.829618	-0.759877	2.43096	0.85949	0.866371	0.23685	-1.07357	-0.913302	1.62636	0.564236	0.748202	0.41885
ENSG00000171298	P10253	2548	GAA	-1.16334	0.719977	-0.600086	0.321925	2.01506	1.26818	-1.58638	-0.819915	-1.02992	0.473955	1.23191	0.372962	-1.08953	-1.21744	-0.450404	0.702672	0.661032	0.840101	-1.67209	-0.238173	-0.225948	-0.187887	0.743662	0.929666	-0.71742	-0.0827414	0.0902454	0.459443	1.18039	0.704171	-1.46416	0.172818	-1.2202	1.42037	1.23521	0.843179	-0.885326	-0.787005	-1.76745	1.58652	1.37953	0.321218	-1.22668	-0.830993	-0.85611	-0.357501
ENSG00000168298	P10412	3008	H1-4	-0.856405	-1.93992	-0.80079	-0.258245	-0.540347	0.100297	0.514563	0.211902	1.24144	-0.0382524	-1.637	-1.30422	0.728944	0.437133	0.226703	-1.2559	-0.0306595	-0.562456	1.42964	2.04727	0.660964	-0.289472	0.993922	0.92089	2.01743	2.4627	2.07297	-0.520058	-0.412767	-1.27848	-0.192582	-0.120137	0.244655	-1.27848	-1.27848	-1.27848	-0.135957	-0.592246	0.00841848	0.0933671	0.0228908	-0.151934	-0.581734	0.815173	-0.0209214	0.219342
ENSG00000142949	P10586	5792	PTPRF	1.93411	1.41663	2.83441	-0.088162	-0.772434	-0.581636	0.0636506	0.154221	-1.65906	-0.868503	0.0125348	-1.44407	0.445365	0.0908895	-0.395646	-0.428027	-0.119921	0.106755	-0.139838	-0.506557	0.138896	0.935774	-0.194114	-0.935271	1.12103	1.24441	1.5894	0.949544	1.36663	1.19814	0.582245	0.652666	0.374316	0.163923	-0.423109	-0.292129	-0.637795	0.244624	-1.82324	-0.869866	-0.166827	-0.885816	-1.32162	-1.28009	-1.8531	0.249239
ENSG00000156976	Q14240	1974	EIF4A2	-1.50368	-0.81872	-1.50386	0.869426	1.14493	1.1373	-0.398205	-1.04697	-0.638156	1.76347	0.41164	0.957669	-0.927745	-0.376104	-0.529838	1.75973	0.742449	0.201154	-1.17757	-0.972105	-0.669851	0.597428	0.456556	0.521049	-1.02791	-0.223485	-1.54651	0.789487	1.30133	1.07456	-1.31936	-1.03535	-0.888906	1.1098	1.76999	1.14814	0.0373173	-0.685487	0.148431	0.78995	1.12042	0.582635	-1.43166	-1.05732	-0.817307	0.262032
ENSG00000186868	P10636	4137	MAPT	-1.07719	-1.27783	-1.37824	1.00987	0.947515	0.767199	-1.11788	-1.22692	-0.96937	0.972682	1.02147	0.701975	-0.83623	-0.628864	-0.719327	1.19084	0.990235	0.772824	-0.68535	-0.74486	-0.843556	1.13223	0.986013	1.01277	-1.02664	-1.28634	-1.34709	1.18216	1.04122	1.12851	-1.46817	-0.929876	-1.27902	1.03325	1.00379	0.987197	-0.614058	-1.02926	-0.591216	0.871615	0.69146	0.780235	-0.936743	-0.403166	-0.366225	0.81226
ENSG00000108946	P10644	5573	PRKAR1A	2.25153	0.711612	0.405476	1.13444	0.361947	-0.161227	-0.500326	-0.461195	-0.703979	-1.49645	-1.22023	-0.0854066	2.1663	-0.515576	1.42269	-1.01963	-1.30628	-0.681268	-0.111954	-0.0650515	0.767885	-0.129236	-0.299106	-0.464959	-0.907624	-1.36452	-0.172268	1.96529	2.64071	1.76271	-1.43231	-0.287341	-0.436419	-0.678151	-0.696874	0.11274	0.0525545	-0.928155	0.400027	-0.340271	-0.0364006	-0.152765	0.14778	-0.963207	0.485017	0.840145
ENSG00000139684	P10768	2098	ESD	0.484259	1.23513	0.261222	-1.5978	-2.18205	-0.934967	0.384943	-0.286427	-0.118283	1.43905	0.922686	0.399927	0.576299	-0.974804	0.0438042	1.70406	0.32669	-0.568076	-0.410516	-1.52704	0.640825	1.00954	-1.03308	0.204606	0.545731	1.02452	1.26219	-0.281107	-0.40024	-0.636305	0.503514	0.697229	0.41578	1.2599	1.20451	2.41544	0.00359338	0.219176	-0.103359	-0.542504	-0.292831	-0.988886	-0.782286	-0.21127	-0.747691	-1.70524
ENSG00000144381	P10809	3329	HSPD1	-0.314389	0.365997	1.07179	-0.420719	-0.804068	-0.078749	1.15333	0.64703	0.745189	1.97776	0.884169	0.955746	-0.719946	-1.95617	-0.506029	1.78279	-0.0420747	0.210193	-1.57008	-0.659271	-0.999172	-0.454389	-0.367161	-0.901769	1.7385	2.85278	1.40532	0.286364	-1.02938	-0.25113	0.610162	0.269815	0.810801	-1.03949	-1.20873	-0.376325	0.533011	0.45559	0.532429	-0.438968	-0.900203	-0.557024	-0.388536	-0.500487	-0.143716	-0.909361
ENSG00000126351	P10827	7067	THRA	-1.5744	-0.966492	-1.14424	0.350148	0.591537	0.304554	-1.99499	-0.695999	-1.04476	0.812494	1.07072	1.31681	-0.979502	-0.19454	-0.285696	1.39653	0.936539	1.02379	-1.21937	0.319582	-0.399964	0.81431	0.662812	0.900136	-1.2786	-1.58239	-1.285	0.919657	0.128751	0.494258	-0.987172	-0.665201	-0.884734	1.61164	1.46177	1.62736	-0.685084	-0.922061	-0.670373	0.901683	0.686685	0.845552	-0.667176	-0.600235	-0.616413	0.744493
ENSG00000120885	P10909	1191	CLU	0.229028	1.31612	0.400003	-0.706903	-0.444262	-0.68935	-0.00132383	0.368645	-0.558871	-3.49221	-0.0743744	0.14941	0.776297	1.70816	0.399851	-0.163263	-1.37662	0.0485425	0.806331	0.410766	0.712233	0.482159	-0.190605	-0.109757	0.407962	0.918115	1.17235	-1.20468	-0.390094	-0.579549	0.960465	0.923509	0.804334	-1.04526	-1.87917	-1.23558	0.951835	1.33478	0.902847	-0.848019	-0.383883	-0.822051	1.47781	0.304701	0.732987	-0.707092
ENSG00000078018	P11137	4133	MAP2	-1.26271	-0.820349	-1.48192	1.53618	1.85204	1.47375	-1.07228	-1.21072	-1.12462	0.948239	0.922321	0.531549	-0.873554	-0.736299	-0.895646	0.742813	0.44349	0.354602	-0.145301	-0.377419	-0.528215	0.97811	0.335783	0.41015	-1.03465	-1.91785	-1.95088	1.81	1.81239	1.34122	-1.00796	-0.680453	-0.807493	0.650538	0.294983	0.916969	0.0931431	-0.897883	-0.102379	-0.0174778	-0.0806052	-0.223938	0.396037	1.16421	-0.0463709	-0.0417772
ENSG00000117394	P11166	6513	SLC2A1	1.87469	1.90698	1.30869	-0.876147	-1.02814	-0.490779	-0.0792156	-0.234816	-0.273421	-0.584506	-1.2326	-0.636043	2.20731	-0.0462951	0.923409	-0.753091	-1.01434	-0.469804	-0.131515	0.0725755	1.07205	-0.527963	-0.799741	-0.187279	1.68499	2.37822	2.30104	-0.207148	0.166907	0.110744	0.122198	0.267899	0.724197	-0.909167	-1.22284	-1.09452	-0.0619266	0.0891643	-0.242367	-0.735416	-0.870323	-1.0245	0.932443	-0.325068	-0.0944841	-0.391054
ENSG00000159023	P11171	2035	EPB41	1.58623	1.84024	1.35142	0.297625	1.17439	0.997006	0.637425	0.38707	-0.0225134	-0.764204	-1.15158	-1.06862	1.08447	-0.617112	0.472922	-1.07954	-1.27091	-1.05251	-0.289814	-0.261241	0.659311	-1.05787	-1.16087	-0.691331	1.19433	0.68658	1.26573	1.20865	2.46151	1.15536	0.170521	-0.0264619	0.177762	-1.41035	-0.996806	-1.14611	-0.673405	-1.32236	-0.644247	0.606721	-1.29808	0.498772	0.0735841	-0.827587	-0.141819	-0.0523073
ENSG00000168291	P11177	5162	PDHB	-0.532498	0.105945	0.0921508	0.189173	0.259528	-0.332707	-0.423685	0.667494	-1.05213	1.17851	2.26113	0.900836	-0.981102	-1.65	-0.721804	1.51031	1.05803	1.1721	-1.26762	-1.21936	-1.11417	0.135325	0.0775809	-0.313036	0.323497	-1.05964	0.604177	1.54749	0.881045	1.5072	0.308397	0.582928	0.562366	0.399999	0.290866	1.16924	0.47941	-0.422494	0.363841	0.208913	-0.734065	-0.722723	-0.678504	-1.14412	0.422683	-0.623451
ENSG00000137992	P11182	1629	DBT	-0.556427	-2.733	-0.853304	-0.246456	-0.789017	-1.29002	0.980988	-1.29775	0.205449	1.42656	-0.304338	1.04411	0.271847	-0.41271	-0.09958	1.21617	-0.639829	0.766585	-0.45259	0.502108	0.362317	1.11014	1.10445	0.684296	-1.24503	-0.898713	-0.467653	0.97358	-0.339261	-0.318096	-0.332199	-1.21281	-1.40849	-1.14881	-0.605868	-0.898713	1.69641	0.249188	1.44584	0.86204	-0.991423	-0.474858	1.08331	1.38584	1.16871	1.30315
ENSG00000100994	P11216	5834	PYGB	-2.4967	-1.30558	-1.88281	-0.918236	0.426827	1.45422	-1.16669	-1.09932	0.0811475	0.658589	0.561214	0.681453	-0.199774	-0.295285	0.293317	0.307886	0.0499489	0.488529	0.208574	0.927832	0.969809	0.19883	0.886839	1.16939	-1.62511	-1.74291	-1.37794	0.615991	-0.021373	0.318715	0.381167	0.154993	-0.104065	1.7974	1.77938	1.93852	-0.933129	0.322736	-0.182599	-0.320335	-0.433901	-0.539372	0.482385	0.387539	1.12127	-0.777347
ENSG00000186716	P11274	613	BCR	0.601838	-1.28965	0.0607767	1.293	0.146898	1.6182	0.676182	-1.30517	0.240195	1.439	-0.630501	0.509294	-0.737038	-1.56701	-0.669072	1.546	-0.738991	0.785258	-1.11358	-0.670826	-0.807655	1.28533	-0.832775	0.160302	-0.620525	-0.469358	-0.473736	1.07199	1.49588	0.785604	-0.224663	-0.640707	0.0788826	1.22898	0.613795	1.45688	-1.60805	-1.06759	-0.988194	0.963528	-0.0162544	0.785	-0.983102	-1.6289	-1.57882	0.709765
ENSG00000185896	P11279	3916	LAMP1	-0.682865	0.0909291	-0.107404	-1.22077	-1.27383	-0.921973	-1.41241	-1.0903	-1.1415	-0.812569	-0.21251	0.839309	0.0216236	-1.03085	0.296788	0.294345	0.491546	1.51328	1.56434	0.992888	0.322102	2.07757	0.85715	0.545121	-1.46389	-2.24055	-1.10925	0.0434873	-0.436316	-0.0561465	-0.873707	-0.285226	-0.597191	-0.217202	-0.624776	0.0557133	0.8487	1.30211	1.72144	-0.302582	-0.131447	0.522152	1.33701	0.596419	1.94971	0.470315
ENSG00000117054	P11310	34	ACADM	0.431354	-0.279207	0.603961	0.0183345	-0.272758	-0.815112	1.37712	0.112417	0.729825	-0.514414	-1.21202	-1.4464	1.08239	-0.246958	0.635068	-1.20324	-1.75272	-0.751863	1.07174	2.10469	1.57576	-0.617646	-0.282217	-0.34811	0.785114	0.309002	0.437335	-1.26126	0.024351	-1.52683	0.737653	0.484103	0.374442	-1.54965	-1.66156	-2.02861	0.140781	1.09814	0.152504	-0.0321044	0.163132	-0.357849	0.991064	1.8243	-0.694937	0.684968
ENSG00000131747	P11388	7153	TOP2A	1.21066	0.599192	0.927196	-0.886884	-1.31779	-0.84312	0.664049	1.07717	1.24665	-0.955602	-1.03431	-0.751571	1.04088	0.695817	0.965212	-0.875742	-0.986006	-0.99072	1.00373	1.14902	0.97296	-0.770721	-1.06145	-1.07862	1.12169	1.10346	1.08731	-0.597407	-0.997813	-0.605534	0.939976	0.885791	0.973468	-0.709135	-1.49771	-0.516493	0.814452	1.08628	0.538682	-1.42448	-0.72661	-1.00207	1.14256	1.12819	0.400304	-0.817014
ENSG00000100714	P11586	4522	MTHFD1	0.99	0.677273	1.0386	-1.33421	-1.63476	-1.37422	0.800776	0.937619	0.463024	-0.960117	-0.746487	-1.11	1.03249	0.59235	0.625195	-0.894614	-0.776502	-0.941276	1.36348	1.3684	1.1316	-0.205505	-0.514938	-0.528171	1.33953	0.247907	1.00578	-1.16497	-2.18545	-0.928141	1.14422	0.878178	1.05928	-0.116829	-0.648872	0.00320272	0.524693	0.987154	-0.41202	-0.421567	-1.46323	-0.741711	1.26052	1.54407	-0.183077	-0.439825
ENSG00000197894	P11766	128	ADH5	0.391552	1.22767	0.927508	-1.64287	-0.553952	-1.71362	0.301792	0.286244	-1.71009	-0.625662	-0.645666	-2.00796	0.490797	0.312831	-0.195483	-0.372893	0.129331	-0.362077	1.18844	0.918988	0.725454	1.40858	0.835199	0.685893	0.982863	0.897213	0.716476	-1.13536	-1.3562	-1.47698	1.1228	0.78442	0.957741	-0.993078	-1.18002	-0.666515	0.951019	1.00985	0.86914	-0.9832	-0.769447	-0.92637	1.15644	1.41671	0.444636	-0.742547
ENSG00000135446	P11802	1019	CDK4	0.136445	0.440977	1.84596	-0.966372	-1.44932	-0.891438	0.517041	0.984934	0.479706	-0.776102	-1.56879	-1.60291	0.847084	0.983309	1.16009	-1.32157	-0.811323	-0.471015	0.711314	0.829804	1.19361	-0.135686	0.202509	-0.338257	1.33073	0.657141	1.41532	-1.43972	-1.51591	-1.12473	1.37234	1.4679	1.49601	-0.722898	-0.864763	-0.899473	0.419143	0.842385	0.0134431	-0.680727	-0.826118	-0.36121	0.659578	0.80687	-0.0308314	-0.529254
ENSG00000101911	P11908	5634	PRPS2	1.68595	0.859567	2.86958	-0.700059	-0.982315	-0.882918	0.368137	-0.0333724	-0.49592	-0.475997	-0.964494	-1.44316	0.785932	0.175858	0.561417	-0.679982	-0.950515	-0.526325	0.582719	0.581329	0.458018	0.772768	-0.71286	-0.853357	1.43978	1.12623	1.6581	-0.736577	-1.21557	-1.23676	0.897755	0.514467	1.03539	-0.778026	-1.80713	-1.07439	0.26185	1.10167	0.242852	-1.18221	-0.626958	-0.850639	0.939242	1.01704	-0.280252	0.249786
ENSG00000132646	P12004	5111	PCNA	1.38235	1.2335	1.40771	-1.11342	-1.30286	-0.821786	0.916943	1.00123	0.968347	-1.1029	-1.04867	-0.763251	0.964852	0.618446	0.865159	-0.917286	-0.870631	-0.880408	0.765102	0.640187	0.708821	-0.793484	-0.883354	-0.974603	1.36075	1.08801	1.29394	-1.2005	-0.838709	-0.736924	1.21788	1.18521	1.10139	-1.11792	-1.19513	-1.05266	0.31401	1.13256	-0.0672916	-0.927884	-0.74043	-0.925588	1.18871	1.14933	-0.566799	-0.32471
ENSG00000170445	P12081	3035	HARS1	-0.560615	0.864554	-1.51076	0.655572	-1.10331	1.98492	0.165003	-0.7634	-0.882185	0.499113	-0.129782	0.758827	-0.353589	-1.48938	-0.806118	1.81323	0.756734	1.20988	-0.603986	-1.18815	-0.613524	0.933987	-0.282388	0.645372	-1.35354	-2.20661	-1.92249	0.375581	0.119074	0.656355	-0.898737	-1.09563	-0.378236	0.47024	0.285834	0.387076	-0.0179056	-0.382764	0.228932	1.24104	1.19006	1.06458	-0.758731	-0.669459	0.282367	1.07505
ENSG00000151729	P12235	291	SLC25A4	-0.840618	-1.42093	-1.58094	0.760595	0.818918	0.933755	-0.665966	-1.27521	-0.691989	1.24599	0.565569	1.18199	-0.659046	-0.91654	-0.703594	1.50267	0.611762	0.509524	-1.04765	-0.66458	-0.716837	1.11538	0.974429	0.963315	-1.23437	-1.40431	-1.78185	1.29072	0.910446	1.08189	-1.20513	-0.167589	-1.10618	0.908035	1.01496	1.22529	-0.67141	-0.868255	-0.823582	0.696023	0.529034	0.719885	-0.694613	-0.489296	-0.587136	0.857893
ENSG00000047410	P12270	7175	TPR	1.13559	0.0860327	0.619889	0.237265	0.478022	-0.648729	1.56248	1.08273	1.79818	-0.683318	-1.00332	-0.817972	0.742768	1.1212	0.712933	-1.03306	-0.899879	-0.978325	-0.113941	0.413796	0.398723	-1.78435	-1.19547	-1.23125	1.1053	0.0977736	0.806019	-0.436049	-0.261556	-1.50747	-0.23608	-1.03914	1.43252	-0.996787	-1.96354	-0.239818	2.18967	0.905565	0.986366	-0.13773	-0.953074	-0.752893	0.927793	0.453602	0.871435	-0.461065
ENSG00000223572	P12532	548596	CKMT1A	-1.10155	-0.534249	-1.20269	0.674283	0.881205	1.10621	-0.949307	-1.39504	-0.63862	1.12938	0.813728	1.40344	-1.20978	-0.848247	-0.594395	1.68808	0.816581	0.553647	-0.866282	-0.972751	-0.858307	0.366824	0.869063	0.868802	-0.152579	-0.888515	-0.177436	1.02781	1.17855	0.886765	-1.10268	-0.636878	-1.0551	0.746181	0.808897	0.924816	-1.43881	-1.2939	-1.06071	1.14639	1.01584	1.00198	-1.43411	-0.95847	-0.9733	0.783225
ENSG00000072110	P12814	87	ACTN1	0.61754	1.26828	1.27823	-1.11663	-0.917496	-0.806593	1.03855	0.815395	0.584841	-1.0576	-1.25868	-1.52191	0.84471	1.15841	0.810585	-1.20141	-1.14637	-0.691114	0.769961	0.82773	1.16375	-0.737941	-0.0898936	-0.632338	0.162142	-0.0162527	0.736545	-2.02555	-1.14188	-1.084	-0.151768	-0.267549	1.06796	-1.62707	-1.55684	-0.778133	1.16101	1.69228	1.25282	0.535278	-0.184705	0.622959	-0.246091	0.938979	0.972452	-0.548353
ENSG00000197122	P12931	6714	SRC	-0.706377	-1.56445	-1.72035	0.139402	0.856313	0.16111	-0.996281	-1.11361	-2.02211	-0.185074	0.267185	-0.208982	0.275123	0.394929	-0.104729	-0.0113733	-0.0728833	0.774843	0.307429	0.487697	0.0856822	2.16861	1.21079	1.5771	-1.82571	-1.50597	-2.27318	0.672697	0.730589	0.779573	-1.18699	-0.697414	-0.859352	1.33882	1.02669	1.20812	-0.372758	-0.135035	-0.546149	0.643504	0.785595	0.570942	-0.158352	-0.447127	0.0596592	0.881676
ENSG00000196419	P12956	2547	XRCC6	-0.41205	0.11488	0.740976	-1.33967	0.213206	0.24643	0.209428	0.416563	-0.602541	-0.0632997	-0.471321	-0.910232	-1.1368	-1.16485	-0.479229	-0.0444415	1.88645	1.08362	-1.6093	-0.507935	-0.512262	2.23604	0.424756	1.68157	1.89	1.03211	1.58776	-0.379586	-1.18371	-0.797348	1.39299	0.98805	1.67509	-0.520342	-1.26587	0.112015	-0.660258	0.212209	-0.538215	-1.25966	-0.902119	-0.877713	0.969894	0.4269	-0.57677	-0.332459
ENSG00000076248	P13051	7374	UNG	1.67159	-1.00576	0.503405	-1.15782	-0.847251	-1.46268	2.13582	-1.10181	0.4873	-0.0963103	-1.13447	-0.627176	0.902642	0.626163	1.02515	-0.476014	-0.492577	0.604526	0.765022	0.843784	0.442974	-1.54077	0.16481	-0.230552	1.24333	1.0758	1.44405	-1.3745	-0.813409	-0.869686	1.4471	1.12686	1.09196	-1.65291	-1.27348	-1.7277	0.275852	0.966113	0.0172533	-0.365244	-0.179307	-0.530499	0.744158	0.677203	-0.408889	-0.177839
ENSG00000171951	P13521	7857	SCG2	-0.517563	-0.676976	-0.905905	1.87358	2.6322	1.33066	-0.463046	-0.742381	-1.17361	1.38766	0.605317	0.0991791	-0.619699	-0.298259	-0.801755	1.2946	-0.246452	0.00475896	-0.502895	-0.39372	-1.07188	-0.0116818	-0.217003	-0.585131	-0.791729	-1.12228	-0.834499	1.80446	2.24682	1.69568	-1.10998	-0.98885	-1.0198	-0.142789	-0.305243	0.173061	-0.149908	-0.469117	0.401959	-0.184116	0.506548	0.0813484	-0.677101	-0.631579	1.35466	-0.264295
ENSG00000149294	P13591	4684	NCAM1	-1.64255	-2.35719	-1.20943	0.196224	0.840226	-0.290361	0.104807	0.466505	-1.41878	0.372927	1.40749	-0.765424	0.585375	-0.615166	0.507891	1.04464	0.954529	1.31137	-0.862006	-0.630552	0.331525	1.02796	-0.0630331	0.703042	-0.733783	-0.856568	-1.13935	0.968168	1.52954	1.17764	-0.400355	-0.359012	-0.323893	1.22724	1.49512	1.20114	-0.990132	-0.83893	-1.48698	0.98671	0.350628	0.562656	-0.806167	-1.0474	-1.64407	0.315702
ENSG00000038427	P13611	1462	VCAN	-0.615336	-0.45263	-0.293726	-0.125137	-0.50105	-0.930772	-0.213056	-1.05398	-0.711516	-1.31356	-0.615965	-1.03962	0.163665	-0.521117	-0.390581	-0.0476193	0.169176	0.828686	1.16575	0.314736	0.240635	3.10012	1.5015	1.3414	1.06734	0.789723	1.47841	-0.850337	-0.898035	-1.15179	0.461682	0.298456	1.07588	-1.76768	-1.61411	-1.47971	0.476714	0.85423	0.106505	-1.35763	0.757302	-1.0781	0.378768	0.55582	0.16052	0.7838
ENSG00000105409	P13637	478	ATP1A3	-0.966547	-1.43626	-1.29609	1.19939	1.79861	1.11361	-0.727305	-1.52314	-1.17143	1.08515	1.43913	0.741365	-0.454872	-1.32064	-0.629153	0.760477	0.507374	0.532968	-0.28763	-0.146333	-0.398116	0.16564	0.26258	0.751212	-0.742084	-0.960788	-1.29014	1.28077	1.25641	1.20613	-0.952336	-0.640021	-1.01045	1.43343	1.39079	1.32663	-1.23597	-1.27954	-1.05302	0.692502	0.46434	0.853791	-0.341844	-0.452701	-0.849821	0.518241
ENSG00000155660	P13667	9601	PDIA4	0.586018	1.68725	0.647116	0.0503761	-0.892666	-0.794052	1.58232	0.430886	-0.312628	0.509617	-0.157277	-1.13231	1.26854	0.733262	0.536128	-1.10011	-1.54779	-1.14093	0.285153	1.03451	1.07072	-1.38464	-0.724306	-1.23517	0.29953	0.241304	0.484559	-0.863356	-0.888014	-0.86167	-0.220726	-0.154322	0.296689	-1.13759	-1.11568	-0.442318	2.01831	-0.308956	2.50044	0.227362	-0.899625	0.401027	-0.208393	-0.054701	2.16862	-0.640564
ENSG00000122884	P13674	5033	P4HA1	0.993905	1.49759	0.884249	-0.447093	-0.85962	-0.965193	0.370715	0.840921	0.650603	-1.41126	-1.43764	-1.56052	0.902705	1.76828	0.945297	-1.40575	-0.528749	-0.948626	0.465988	0.274108	0.829321	-0.587543	-0.100731	-0.170946	0.990872	1.98625	1.66706	-0.648744	0.275079	0.034886	0.37421	0.711576	1.19821	-1.26703	-1.34394	-0.929977	0.676943	0.58654	0.533708	-1.14902	-0.467044	-1.58724	-0.339593	0.882769	0.290411	-0.958278
ENSG00000133112	P13693	7178	TPT1	2.24558	1.59205	2.07994	-0.622953	-0.774014	-0.704918	0.338353	0.77307	-0.149989	-1.04209	-0.632094	-0.930984	1.01844	0.147177	0.0377737	0.0167957	-0.165595	0.0799617	0.684026	-0.671473	-0.303873	-0.0449896	-1.42526	-1.54492	1.03679	1.62796	1.15784	-1.19258	-1.01209	-0.926648	1.0526	0.910654	0.688211	0.323513	0.401215	0.0187857	0.279223	0.245924	0.689091	-0.791453	-1.20379	-0.473687	0.487343	0.0874565	1.10787	-1.44917
ENSG00000102024	P13797	5358	PLS3	0.387545	3.1264	2.03749	-0.673463	-0.602361	-0.551307	-0.696962	-0.468225	-0.304444	-0.929404	-0.434692	-0.708748	0.494853	-0.060544	0.0440506	-0.905648	-0.478509	-0.500927	0.248786	1.73618	0.261734	-0.571941	0.179635	-0.629503	0.981856	0.65567	2.07532	-0.519909	-0.647301	0.25264	-0.246226	-0.276616	0.19897	-0.403903	-0.567582	-0.264694	0.307023	0.613079	0.257833	-1.24797	-1.12531	0.192777	1.6925	1.3921	0.253641	-0.332151
ENSG00000104812	P13807	2997	GYS1	0.661469	-0.105449	0.157362	-0.138503	0.0742062	-0.434461	-0.499386	-0.571802	-0.421239	-1.45645	-1.26293	-1.08653	1.52507	2.54665	0.898632	-1.10199	-0.765444	-0.793866	1.45193	0.734777	1.21701	-0.692359	-0.00563987	0.0689409	0.843821	0.245168	1.50233	0.127169	0.76027	0.668685	1.26748	0.029763	1.24028	0.73423	-0.102102	-0.953859	-0.128489	1.1321	0.628939	-0.475515	-0.276146	-1.10025	-0.738577	0.0943955	-1.83784	-0.313765
ENSG00000114302	P13861	5576	PRKAR2A	-1.03496	0.455618	-1.04489	1.6931	2.77192	1.47395	-1.13531	-0.331422	-0.894893	0.581492	0.86916	0.675133	-0.0968545	-0.893107	-0.353367	0.293944	-0.177819	0.00219834	-1.38707	-0.772904	-0.0873867	-0.667098	-0.226707	0.287268	-1.33699	0.0976161	-0.424711	2.32204	1.71974	1.6988	-0.828931	-0.498086	-0.396222	0.0642874	0.285805	0.548721	-1.20668	-1.0837	0.0151476	0.74003	0.266893	0.259662	-1.40765	-0.726714	-1.32701	0.641627
ENSG00000188342	P13984	2963	GTF2F2	0.524579	-0.0603628	1.33262	-0.00217845	-0.342085	-0.685202	1.75661	-0.60765	0.834502	0.887523	-0.156889	-0.581993	0.601074	1.1365	0.618488	-0.0210752	-1.16453	-0.445299	0.816206	0.36592	0.674317	-2.00614	-2.0106	-1.46433	1.76402	1.06547	0.941537	0.427659	-0.967884	0.738027	1.18294	1.30875	0.554121	0.00384108	-0.45759	-0.375125	0.743838	0.238251	0.225252	-1.51414	-1.08276	-1.04472	0.592704	0.316751	-0.213123	-1.59506
ENSG00000131095	P14136	2670	GFAP	-0.360312	-0.694288	-0.855261	-0.419823	-0.887455	-0.760392	-0.660867	-0.447098	-0.311841	-0.580993	-0.77611	-0.599296	1.4413	1.26	1.05587	-0.546382	-0.762629	-0.595222	1.76161	2.15141	2.06356	-0.122965	-0.175253	-0.177561	-1.13708	-0.442114	-0.339025	-0.364958	-0.499158	-1.33881	0.248395	0.196586	0.146847	-0.675513	-1.20561	-0.624275	1.31653	1.74418	1.15185	-0.936565	-0.371606	-0.268807	1.83999	1.59988	1.327	0.416885
ENSG00000002586	P14209	4267	CD99	1.32499	1.65777	1.30449	-0.70623	-0.547321	-1.50024	1.1577	1.27474	-0.59657	-1.03065	-0.93389	-1.54816	1.03007	0.628916	0.728831	-1.27476	-1.06307	-0.145084	0.752195	0.421206	0.158235	-0.644957	-0.0749576	-0.373259	1.03116	1.23054	1.13694	-0.797738	-1.13985	-0.670622	1.12755	0.945345	0.964031	-0.424701	-0.585756	-0.442014	0.761509	1.16057	0.771888	-1.25777	-0.582214	-1.26158	0.68137	0.688564	0.551742	-0.683836
ENSG00000130175	P14314	5589	PRKCSH	0.321574	1.61238	2.40625	0.732251	0.55329	-0.510743	1.30123	0.164624	-0.676879	-0.214223	-0.794964	-1.79869	0.965907	-0.070134	0.145301	-1.74108	-1.20414	-0.585085	-0.311368	0.699939	0.325945	-0.706194	-0.0352927	-0.579892	0.902222	0.661786	0.726587	-2.01028	-0.326246	-0.494517	-0.462915	-1.42636	0.442875	-0.578602	-0.684797	-1.73305	0.0864971	0.907986	0.714434	0.582669	-0.645787	0.934378	1.07431	0.779144	1.80157	-1.5873
ENSG00000160752	P14324	2224	FDPS	1.2049	0.852563	1.25123	0.288569	-0.359265	0.0726105	1.03591	1.58399	-0.219209	0.656981	1.37918	0.201743	0.0666324	0.293165	0.31323	-0.186321	-0.568479	-0.533288	0.0677508	-1.00458	-0.898752	-1.41335	-1.90257	-2.18263	1.36965	0.860369	1.01791	1.08845	-0.199429	0.825539	1.24921	0.92822	1.38071	0.457113	-0.0263365	0.779711	-0.844802	0.540505	-0.868419	-0.806128	-0.489924	-0.932829	-0.413299	-0.12532	-1.47766	-1.49937
ENSG00000112695	P14406	1347	COX7A2	-1.13864	0.324388	0.578787	0.0296316	1.04274	0.575983	-1.70923	-0.735377	-1.52056	-1.45084	-0.690314	-1.23182	-0.397498	-0.922222	-0.0160955	-0.642373	1.04928	0.307892	0.80041	1.07241	1.13658	1.21911	1.38044	0.937308	-0.60774	-0.729799	-0.871226	1.47449	0.688179	1.62784	-0.708582	-0.418599	0.108169	1.05109	1.31795	1.48215	-1.86378	-0.795331	-1.32579	-0.32278	0.742139	0.751873	-0.412279	-0.816992	-1.33967	0.752262
ENSG00000117448	P14550	10327	AKR1A1	-0.60306	0.0424919	0.399975	-0.997744	-0.253095	-0.543512	-0.66322	0.00331041	-1.17498	0.779939	1.00835	0.459966	-0.908798	-1.15386	-0.63132	1.91253	1.38012	1.25201	-1.80634	-0.515934	-1.05255	1.04507	0.955606	1.06505	-0.421513	-0.0164072	0.281997	-0.742393	-3.22468	-0.939983	0.0178791	-0.0424733	0.384414	0.904317	1.54539	0.236113	-0.443627	0.316238	-0.607866	1.63968	1.06475	0.782427	-0.799808	-0.863052	0.284262	-0.22164
ENSG00000067225	P14618	5315	PKM	1.03166	2.89691	1.56499	-1.00788	-0.794794	-0.58871	-0.0193553	0.712545	0.0609968	-1.30578	-1.0912	-1.0896	0.838714	0.933258	0.510502	-1.15836	-0.277282	-0.589825	0.120376	-0.0507956	0.53237	-0.430269	-0.622277	-0.176196	1.35416	1.30423	1.80375	0.230364	0.172866	0.0873163	1.00428	0.96436	1.41425	-0.561175	-0.680329	-0.163997	-0.664462	0.855751	-1.08488	-1.31198	-0.793307	-1.3067	0.586102	0.289069	-1.27342	0.112096
ENSG00000170634	P14621	98	ACYP2	0.731107	-1.05003	-0.731578	-0.816319	0.424453	0.0889871	0.197759	-0.760976	0.305504	-1.96355	-1.33094	-0.929588	1.50084	0.972367	0.850908	-1.35353	-0.844173	-0.422491	0.826672	0.945897	1.92638	0.539649	0.175423	0.71721	-1.11929	-1.13545	0.907646	1.12682	1.87896	1.032	-1.0591	1.11068	0.246328	0.757498	0.558674	1.40443	0.486755	0.0637627	-0.244269	-0.828506	-0.483528	-0.801776	1.11068	-0.497931	-1.09112	-0.975914
ENSG00000196465	P14649	140465	MYL6B	1.33069	0.725137	-0.050194	1.13184	1.01746	1.2459	-0.670418	-0.660018	0.301753	-1.50953	-0.367832	-0.75922	0.63338	-0.165497	-0.138532	-1.27557	-1.69222	-2.13876	0.537015	1.52003	0.498216	-0.198549	0.683059	0.00185782	-0.728626	-0.811365	-0.388495	1.31662	1.1673	1.76613	-0.454806	0.303245	-0.428443	0.737278	1.1276	1.00183	-1.81558	0.564456	-1.3929	0.333992	0.793052	0.383689	-0.251363	-0.537653	-2.26063	-0.0836629
ENSG00000119912	P14735	3416	IDE	1.08373	1.80527	0.99126	-0.883539	-1.67426	-0.633474	0.969971	0.391138	0.620591	-0.317023	-1.15176	-0.965239	0.792341	0.280236	0.814093	-0.370906	-1.13181	-0.588122	1.13586	0.985187	0.998581	-1.00796	-1.23785	-0.906319	0.486615	-0.181468	0.271692	-1.12562	-0.162882	0.0336167	0.0608467	0.455431	1.17643	-1.13904	-0.079387	-0.834742	2.21357	-0.305701	1.75179	-0.749139	-1.03565	-1.08566	-0.051307	0.580288	2.09986	-0.421011
ENSG00000143190	P14859	5451	POU2F1	2.24827	0.0449653	-0.794186	1.45902	1.29281	1.81456	-0.135829	0.281428	0.00788488	-0.332671	-1.35502	-1.51834	0.945607	0.321609	-0.0503584	-1.03705	-1.17988	-1.23114	0.0581384	0.330745	0.117525	-0.0733728	-0.515597	-0.699106	0.154308	-0.165959	-0.329559	-0.647801	0.279027	-0.118892	-0.100777	0.134027	0.0441807	-1.41743	-1.5499	-1.83072	0.581578	0.846015	0.13642	-0.841125	-0.993527	-0.747726	1.96287	2.40912	0.714602	0.738371
ENSG00000104824	P14866	3191	HNRNPL	-1.73422	-1.6952	-0.904068	1.15239	2.02436	0.68632	0.568042	-0.425204	-0.523764	1.46617	-0.176232	-0.0287382	-1.52482	-0.0223364	-0.103033	0.807128	1.15324	0.755992	-0.7295	-0.433065	-0.293736	-0.830356	-0.199616	1.01024	1.13384	0.535655	1.42867	-0.607504	-1.3802	-0.737147	1.35132	0.737781	1.59717	-0.982005	-1.44793	-0.706634	0.406787	0.981743	0.00729202	-1.36022	-0.519991	-0.892167	1.15093	1.26766	-0.180018	-0.695294
ENSG00000115866	P14868	1615	DARS1	2.04058	0.734108	1.41189	-0.270727	-0.131092	-0.811055	-0.0889484	0.450684	-0.0717316	-1.08785	-0.516253	-1.10238	1.59465	1.31037	0.775374	-0.726514	-0.751372	-0.866441	0.530969	0.388928	0.723599	-0.475918	-1.30457	-1.7563	1.15178	1.34789	1.12885	-0.588932	-0.681516	-0.673538	0.861786	1.05908	1.16211	-1.00525	-1.34743	-0.769586	1.16977	1.32169	0.636135	-1.03044	-1.06299	-0.814377	0.544655	0.531254	0.230743	-0.602663
ENSG00000156467	P14927	7381	UQCRB	-0.68024	-0.917398	-1.38903	0.559295	-0.617888	0.144612	0.332326	0.419874	0.0797168	1.67664	1.74102	1.66777	-0.691591	-2.23292	-0.772598	1.20479	0.182832	0.533421	-0.863983	-0.7165	-0.688207	0.698097	0.283383	0.0465705	0.273694	1.19921	0.140253	0.192396	0.11267	0.25317	0.00672993	-0.235992	0.29515	0.452409	0.7668	0.887742	0.210287	0.196264	-0.0578668	-0.640569	-1.96092	-0.448232	1.84196	1.57812	0.0402323	-1.30133
ENSG00000135821	P15104	2752	GLUL	0.791957	2.52663	0.623918	0.184452	0.167197	0.176225	0.66592	1.45569	0.422271	-1.12953	-0.9522	-0.653949	0.0546776	0.92756	0.757463	-1.43009	-0.883456	-0.839333	-0.0826357	0.686403	0.258379	-1.30367	-1.26907	-1.15481	0.965993	1.29772	0.753885	-0.81722	-0.609994	-0.742406	1.14972	1.03205	1.25528	-1.21807	-1.47318	-1.04442	0.876827	1.41012	0.569534	-0.941662	-0.952558	-0.981582	1.14163	0.540376	0.107021	-0.36034
ENSG00000085662	P15121	231	AKR1B1	-0.0384392	0.337795	0.27284	0.385302	1.25224	0.00893791	-0.0285185	-0.724012	-0.833366	0.035461	-0.685773	-0.677628	-0.758287	-0.766098	-0.574933	-0.112971	-0.236613	-0.289502	-1.50825	-0.365864	-0.899221	1.33814	2.90223	1.96654	0.928937	0.219653	0.880107	0.763126	0.802433	1.13147	-0.116753	0.18844	0.134867	-0.576591	-1.82313	0.103581	-1.88137	0.191243	-2.38594	-0.146196	0.632615	0.266332	-0.963295	-0.176322	-1.02943	0.780129
ENSG00000092820	P15311	7430	EZR	-1.26218	-1.01809	-0.696802	-1.50513	-2.05639	-1.08567	1.48007	0.525822	1.37509	-0.199637	-0.509506	-0.33133	0.193203	1.56778	1.09465	-0.929133	-0.0454471	0.0101669	0.702594	0.711429	0.958116	-0.29592	0.573954	0.742357	-0.0732624	-0.054987	-0.0652685	-1.87195	-3.11722	-1.86396	0.737076	0.901199	0.649422	-0.446606	-0.430045	-0.371357	0.980702	0.808198	0.892975	0.244054	0.410373	0.0548127	0.372753	0.477783	0.798039	0.240193
ENSG00000115966	P15336	1386	ATF2	-0.770621	-1.098	-1.39894	1.17733	2.04966	1.00975	-0.898455	-0.625553	-0.981475	0.237144	1.16511	-0.377638	-0.92173	-0.350043	-0.853855	0.866793	1.05503	1.10688	-0.556926	-0.259436	-1.50227	0.258235	0.96494	0.704074	-1.09551	-1.36664	-1.71248	0.898426	1.34557	0.982134	-1.80889	-1.24173	-1.34775	0.171558	-0.227375	0.0669312	0.713793	-0.758699	0.299035	1.2637	0.253369	1.2122	-0.180153	-0.363048	0.481887	0.612712
ENSG00000118939	P15374	7347	UCHL3	-1.02847	-1.10653	-0.686129	0.834454	0.872024	0.419796	-0.61443	-0.483841	-1.75563	1.82584	1.24724	1.15885	-0.824168	-0.417213	-0.732779	1.69096	0.233335	1.42464	-0.715225	-0.423064	-1.11549	-0.335598	-0.0220654	0.553488	-0.552229	-0.904106	-0.148141	1.39277	0.448808	1.25032	-0.377311	-0.464254	-0.434414	0.823491	0.0999093	1.51631	-1.54959	-1.68407	-1.26056	1.33038	1.71721	0.982393	-0.944424	-0.833224	-0.40005	0.451091
ENSG00000239672	P15531	4830	NME1	-0.0650773	0.296754	0.513904	-0.996776	-1.47183	-0.800532	0.636816	-0.327346	-0.714956	2.26254	1.6695	0.803756	-0.798422	-1.50414	-0.901462	1.90554	0.976607	0.202259	-0.49131	-0.624163	-0.521636	0.0540029	-0.14422	0.040186	0.273969	-0.514847	-0.342621	0.870539	-0.311774	0.171043	0.231678	-0.155851	0.0691963	1.47586	1.74724	1.98137	-1.84071	-0.975649	-1.8923	0.277003	0.648715	0.401782	-0.437306	-0.4239	-1.75751	0.610013
ENSG00000140988	P15880	6187	RPS2	0.945307	1.98431	2.15066	0.441489	0.0784035	0.120835	1.5321	0.349526	0.0179635	0.12238	-0.177676	-1.41566	0.156096	-0.359176	-0.0313697	0.873276	-0.264542	-0.762523	-0.383199	-0.656489	-0.371299	-1.13139	-1.43306	-1.78596	1.24705	1.79007	1.60247	-0.229352	-1.9676	-0.881285	1.2132	0.765914	1.24953	0.286779	0.160253	0.389487	-0.249589	0.0699008	-0.0543077	-0.590843	-0.768031	-0.0358413	0.193079	-0.609656	0.226942	-1.32349
ENSG00000128656	P15882	1123	CHN1	-0.350133	-0.803254	-0.0858577	0.854153	1.85097	0.821055	-0.771806	-1.77045	-0.959147	-0.326495	-1.1078	-0.763349	-0.133966	-0.706449	-0.352779	-0.573783	-0.502837	0.644882	-0.371689	0.663072	2.66931	0.511713	0.782478	0.782158	-0.0306016	-0.0727371	0.068133	0.979755	1.93395	1.53225	-0.85894	-1.02608	-0.938395	-0.593002	-1.51544	-0.915424	-1.25429	-0.688419	-0.777668	0.441992	0.492339	0.409318	-0.0984967	-0.683527	-0.53607	1.26024
ENSG00000196628	P15884	6925	TCF4	-0.298004	-1.78273	-1.01411	-1.08704	-1.81999	-1.29857	-0.205209	-0.31275	-0.194594	-0.431524	-0.347008	-0.0968606	-0.0441587	0.279574	0.351223	0.722391	1.40919	1.35547	0.0299543	0.0210494	0.117609	1.95039	1.22641	1.46929	0.131185	-0.0326976	-0.0505697	-1.28289	-2.60839	-1.67619	0.353299	0.613461	0.718064	-1.40708	-1.1684	-1.37916	0.818493	0.368115	0.450112	0.693525	0.516141	0.397025	0.782253	1.02151	0.631949	0.673133
ENSG00000071564	P15923	6929	TCF3	1.1089	0.523829	0.947991	-1.44839	-2.54153	-1.17212	0.565385	0.925857	0.301438	-1.67543	-0.758019	-0.858061	1.0014	0.662988	0.913794	-1.2312	0.470857	0.324741	0.976748	0.185274	0.224491	0.196051	0.277317	0.0776873	0.904295	0.895065	1.35225	-1.28604	-1.83298	-1.41676	1.09768	0.943607	1.3749	-0.952169	-1.24447	-1.05269	0.574855	0.856711	0.535474	-0.72759	-0.397386	-0.55278	0.733381	0.92376	0.630315	-0.616608
ENSG00000117748	P15927	6118	RPA2	1.69585	1.20891	1.78034	-0.793659	-1.14271	-1.67945	0.597242	1.59973	-0.0228488	-0.567724	-0.476805	-1.35059	0.975967	0.744221	0.501155	-0.665891	-0.128768	-0.435721	0.569009	0.154428	0.114569	-0.523594	-0.870293	-1.28336	1.9186	0.838561	1.62304	-0.405855	-0.538542	-0.334197	1.30158	1.071	1.4194	-0.527104	-0.792997	-0.531184	-0.555788	1.26674	-1.04154	-0.961279	-0.954614	-0.477007	0.720874	0.303924	-1.50605	-0.32281
ENSG00000127184	P15954	1350	COX7C	-1.05799	0.0156641	1.07734	1.24831	1.35317	-0.677413	-0.88577	-1.1192	-2.27063	0.368177	0.869324	-1.19127	-0.195847	-1.28103	-0.904205	0.629786	0.477096	-0.289322	0.552204	1.17555	0.225055	1.02314	1.13991	-0.282052	0.307706	0.0607385	0.512808	1.73049	-0.166473	0.170257	-0.658351	-0.0499078	-0.898472	1.57361	1.81464	1.96171	-0.8739	-1.5085	-0.635067	-0.0662565	0.169307	0.688563	-1.05769	-1.41071	-0.114384	-0.443922
ENSG00000035862	P16035	7077	TIMP2	-1.68647	-1.13199	-0.489845	0.960634	0.343509	0.0367095	-1.75713	-1.56407	-0.896349	2.20544	1.05416	0.887003	-0.879302	-0.0283729	-0.00252585	1.53939	0.503937	0.786951	-0.301307	-0.124717	-0.0275412	0.00111743	0.606389	-0.0356231	-1.54376	-1.84853	-1.09387	0.495369	-0.0226113	0.580217	-0.918447	-0.580532	-1.03125	1.84888	1.91092	1.50746	-0.745366	0.289649	-0.702651	0.678856	0.668442	0.707826	-0.0626225	-0.0464647	-0.996039	0.285134
ENSG00000188486	P16104	3014	H2AX	-0.209268	-1.61845	-0.912623	-0.160472	-0.929821	-0.623461	0.638172	0.324669	2.68684	-0.359263	-1.10321	-0.601097	0.498158	1.01962	0.435574	-1.233	-0.692242	-0.674961	0.636477	1.32937	0.877161	-0.837441	0.943183	0.566091	1.35407	1.39853	1.39532	-0.942911	-1.44421	-0.539443	1.04888	1.02772	1.06382	-0.890307	-0.981589	-0.98109	0.338061	1.12532	0.0679811	-0.987083	-0.748094	-0.817549	1.13556	0.984653	-0.145841	-0.582281
ENSG00000122912	P16260	8034	SLC25A16	-1.15209	-0.186817	-1.57941	-0.258701	0.71402	0.543863	-1.712	0.191933	-0.441452	1.5053	2.82631	0.635122	-1.17837	-0.430589	-0.836064	1.11534	0.796844	-0.211933	-0.0103753	-0.172848	-0.317495	0.319186	-0.0147341	-0.145043	-1.49802	-1.33205	-2.12736	-1.04904	-1.47163	0.0292088	-0.236216	-0.00956345	-0.41961	1.51456	1.07375	0.476431	0.176043	0.60964	-0.303085	0.760074	-0.205543	-0.14499	1.63948	1.70916	-0.228522	0.627747
ENSG00000107758	P16298	5532	PPP3CB	-1.28346	-0.731724	-0.767706	0.585778	0.640779	-0.108184	-0.864838	-0.88532	-1.46988	0.774219	1.68004	0.580424	-0.784302	-0.97041	-0.788474	1.49447	1.43814	1.1208	-0.406993	-0.93379	-0.942505	1.03577	0.884943	0.702228	-1.22235	-1.43917	-1.20363	1.40072	1.07202	1.18763	-1.38574	-0.716282	-1.02024	1.20365	1.2434	1.25058	-0.646043	-0.894578	-0.410903	0.834817	0.399062	0.912072	-0.848548	-0.683569	-0.561575	0.418822
ENSG00000158092	P16333	4690	NCK1	0.769841	1.34965	-0.643594	-0.481401	-1.94357	0.13837	0.724619	1.70551	0.777719	-0.737781	-0.823868	-0.758906	0.895178	0.991066	-0.145128	-1.30655	-1.33733	-1.65252	0.185725	0.259991	0.386045	1.34051	-0.146384	0.452811	-0.774155	0.308667	0.340574	-0.812557	-0.741996	-0.726029	0.59544	0.194578	-0.556549	-0.814042	-1.61446	-1.02081	1.81149	0.511916	1.70469	-0.634591	-1.40133	-0.474871	1.37744	0.551945	2.02974	0.259155
ENSG00000184357	P16401	3009	H1-5	1.02755	-0.798294	0.229307	-0.742127	-1.57605	-1.37911	0.444451	1.09171	1.59253	-1.16959	-1.26978	-0.824953	0.799568	0.90953	0.382318	-1.4187	-0.24614	-0.602678	1.22035	1.55563	0.816967	-0.278251	0.10916	0.126582	2.56068	2.35068	-0.513003	-0.513003	-0.513003	-0.513003	-0.513003	-0.513003	-0.513003	-0.513003	-0.513003	-0.513003	-0.513003	0.695249	0.839812	-0.513003	-0.513003	-0.513003	2.13747	-0.513003	-0.513003	-0.513003
ENSG00000127948	P16435	5447	POR	-0.566481	1.28078	0.826739	1.05284	1.06224	1.10105	-0.451039	-0.110812	-0.202939	1.39535	1.23789	0.576826	-1.1113	-0.9475	-0.765335	0.901038	0.2285	1.19682	-1.45055	-1.33574	-1.20112	-1.0322	-0.787944	-0.897109	0.37288	-0.910473	1.11775	1.22733	1.12729	1.72885	0.588172	0.0575156	0.947044	0.187289	-1.06387	-0.074722	0.171336	-1.18044	-0.388296	1.18854	-0.121153	0.0769145	-1.5327	-2.34574	-1.26259	0.225835
ENSG00000170430	P16455	4255	MGMT	1.042	1.68357	0.810164	-0.335606	-0.447412	-1.16621	0.928301	1.28957	1.15403	-1.13389	-0.310142	-0.964659	1.24128	-0.116298	1.33206	-1.47303	-0.242195	-0.709651	-0.490872	-0.782565	0.818937	-1.68062	-0.413855	-0.0328853	1.23511	1.45933	1.98443	-1.17861	-0.312117	0.0338151	1.196	1.13856	0.711573	0.930497	0.25361	-0.275613	0.040331	0.579428	-1.78118	-0.401642	-0.113354	-1.18853	-0.886967	-0.416834	-0.356535	-0.790127
ENSG00000109472	P16870	1363	CPE	-0.697854	-0.985759	-1.43547	1.06581	1.24008	0.368236	-0.737618	-1.31373	-1.51131	0.985528	1.07665	0.538293	-0.2466	-0.4208	-0.942138	0.71791	0.326535	1.12434	-0.586326	-0.483397	-1.44261	1.49329	1.09811	0.768835	-1.14757	-1.44175	-0.993767	1.01564	0.927353	0.817744	-1.01288	-0.490458	-1.0311	0.795794	1.07679	0.853683	-0.786363	-0.811204	-0.34713	0.436095	0.991065	0.66699	-1.5132	-1.40268	-0.0335335	1.20076
ENSG00000103876	P16930	2184	FAH	0.682657	3.38475	1.10921	-0.286896	-0.0861222	-0.267806	-0.134541	0.813763	-0.447583	-1.52061	-0.330658	0.314927	0.909014	0.399153	0.331846	-1.54459	-0.526515	-0.594853	-0.373798	0.0193073	0.12302	-1.28062	-0.0855161	-0.60755	0.979103	1.24381	1.56322	0.387705	0.912894	0.231333	0.480062	0.772422	-0.263667	-1.46703	-1.26753	-0.0401254	1.02779	0.984292	1.05537	-1.03823	-0.532463	-1.17573	0.0639407	0.0727031	0.270785	-1.42526
ENSG00000117632	P16949	3925	STMN1	-1.46967	-1.38873	-1.61378	0.594115	0.446586	1.07002	-1.16326	-1.50885	-0.894251	1.1247	0.615835	0.605491	-0.565792	-0.901192	-0.511491	1.01712	0.821475	0.896346	-0.092869	-0.0206431	-0.511656	1.24141	1.03074	1.17836	-1.05786	-1.6072	-1.65794	0.776172	1.11692	1.02447	-0.774439	-0.264394	-1.02155	0.967708	1.08938	0.875036	-1.14523	-0.153076	-1.33789	0.57528	1.33085	0.429885	-0.0957711	0.0807947	-1.3367	0.887598
ENSG00000060138	P16989	8531	YBX3	0.96393	0.834445	1.1528	-1.04903	-1.32678	-1.14083	1.25615	0.707027	0.277228	-1.44069	-1.27796	-1.59245	1.1906	0.890116	0.94096	-0.845907	-0.435138	-1.05209	0.668103	0.797078	0.8608	-0.309984	0.443225	-0.511596	0.682847	1.15449	0.993254	-0.761584	-1.28261	-0.663399	0.815566	0.525723	0.420778	-1.5199	-1.48737	-1.03784	1.30522	0.829067	1.39531	-0.80814	-0.487417	-0.830946	0.888779	0.696789	1.34848	-0.370681
ENSG00000105708	P17017	7561	ZNF14	0.415615	0.690672	2.4736	0.371337	0.987389	-1.11301	0.0622885	-0.0827402	-1.41027	-1.22746	0.628148	-0.599798	-0.269282	-1.77267	-0.497494	0.205109	0.886884	1.6718	-1.22161	0.625541	-0.433067	0.0473667	0.207397	-0.645741	-1.04626	-1.65537	-1.46705	-0.29844	0.549832	0.86934	-1.38434	-0.75486	-1.03769	-0.153956	0.596696	0.0702504	0.0133411	-1.5883	0.416148	1.42701	0.626229	1.04448	-0.176238	-0.28428	0.217577	1.66313
ENSG00000165512	P17026	7570	ZNF22	-1.02184	-0.877672	-1.8057	0.449452	0.712473	0.731071	0.589135	0.0188105	1.56736	-0.372191	-0.176643	-0.041122	0.444447	0.281962	-0.744757	-1.04474	-0.756006	-1.34618	-0.0195509	0.725725	1.25713	-1.55494	1.03265	1.95112	1.00593	0.307601	1.01763	-1.2567	-0.894261	-1.12451	0.373167	0.713609	1.24987	-2.59316	-1.57196	-1.19028	0.888651	-0.264492	0.579493	0.0319892	-0.289799	-0.235255	0.877577	1.32288	-0.0301724	0.530298
ENSG00000172466	P17028	7572	ZNF24	0.990329	0.746768	1.38087	-0.592169	-0.992163	-0.949082	1.14739	1.75585	0.717438	-0.680182	-0.832114	-1.00662	0.863849	-0.258213	0.3669	-0.394394	-1.30045	-0.666937	1.14187	0.526415	1.15932	-0.539989	-1.76162	-0.823059	1.12837	-0.519677	0.991719	-0.337664	-0.353121	0.0367018	-0.113944	0.707444	1.26945	-2.13031	-2.20918	-1.16757	1.25544	-0.686694	0.593264	-0.00785589	-0.889647	-0.297853	1.09331	0.672997	-0.13028	1.24573
ENSG00000175395	P17030	219749	ZNF25	0.98053	-1.38614	-1.90022	0.0441203	0.617849	-0.914434	-0.753594	0.306316	-1.84915	-0.28801	1.68038	-0.501944	-0.0336748	0.0971857	-0.385353	0.0892256	0.784016	1.03855	-0.0705729	-0.274768	-0.919744	1.96151	0.888401	0.789515	-1.18619	-1.66741	-1.62764	0.972768	1.01261	0.98369	-1.36142	-1.35244	-1.53612	0.663137	0.730691	0.974426	-0.360577	-0.427413	-0.228892	0.58485	0.906008	0.722741	-0.610018	-0.101554	0.0185055	1.07952
ENSG00000198951	P17050	4668	NAGA	0.517035	0.492821	-0.815703	-1.27734	1.09293	0.219515	-1.31217	0.0120456	0.316405	-1.84691	-1.02219	-0.984416	1.11893	-1.13532	1.13005	-0.804862	-0.307629	-0.425819	-0.248919	0.351371	1.56431	0.685846	0.974443	1.70557	0.9302	0.790864	1.43113	-0.712028	0.10436	0.403721	0.880919	0.799662	1.2583	-0.544964	-1.26024	-0.719537	0.697021	1.15737	0.524414	-1.24974	-0.881757	-1.6521	0.665541	0.801123	0.181369	-0.617472
ENSG00000137309	P17096	3159	HMGA1	0.770844	-0.47558	-0.363644	1.42816	1.95134	1.55455	-0.44196	-1.14324	-0.596995	0.936296	0.286219	0.515274	-0.529077	-1.13085	-0.836107	1.24965	0.464857	0.550441	-1.23358	-1.61841	-1.41572	0.229762	-0.352183	0.199961	1.04911	1.67119	0.387473	1.02008	-0.102834	0.305782	0.202304	0.0643784	-0.425721	1.37951	1.34409	1.32006	-1.04157	-0.30646	-0.921755	0.369035	0.155796	0.554362	-1.9378	-1.29893	-0.950574	-1.02587
ENSG00000278129	P17098	7554	ZNF8	0.471361	-0.824543	0.399417	-0.275444	0.725815	-0.0939902	-1.23711	-0.736453	-0.729223	-1.21929	0.552605	-1.48523	-0.416632	0.327308	-1.27736	-0.780905	0.251834	0.751345	-0.424606	1.40018	0.355756	2.2039	2.1089	-0.0476453	-0.931823	-1.16277	-1.14593	-0.902867	0.0731956	-0.442818	-0.81381	-0.454567	-0.72317	-0.615861	-0.779241	-1.20683	-0.0286567	-0.640192	0.232594	1.09523	1.30417	0.994153	-0.121529	0.329452	0.512993	1.97328
ENSG00000178307	P17152	8834	TMEM11	-0.969768	-1.48344	-1.28654	1.03251	0.654771	0.196541	-0.208224	-0.836192	-0.264514	1.80807	0.587185	1.04677	-0.964839	-1.455	-0.921712	1.74033	0.697761	0.816289	-0.799134	-0.419595	-0.951983	0.603368	0.821309	0.556032	-0.66344	-1.54825	-0.0344236	-0.251631	1.23913	-0.361558	-0.590695	0.0728824	-1.55208	-1.61764	-1.19793	-0.45735	0.0551259	-0.279713	-0.180436	0.894002	0.72598	0.653714	1.43691	-0.561179	0.350311	2.08352
ENSG00000154229	P17252	5578	PRKCA	-1.86536	-1.78208	-2.04694	0.00242892	-0.700105	-0.672512	0.4438	0.275155	-0.32574	1.72329	1.38767	0.363473	0.0965845	0.952323	0.269715	0.407263	-0.237592	-0.0065292	1.26732	1.58737	0.0422098	-0.411593	-0.361796	-0.408347	-1.644	-1.4322	-1.41677	1.13328	-0.302999	0.0674262	0.0321422	0.228442	-0.0916642	1.56127	1.34182	1.73446	0.927489	0.107698	0.405478	-0.462445	-1.00297	-0.95155	0.863202	1.29133	0.0215366	-0.801601
ENSG00000164171	P17301	3673	ITGA2	1.4094	1.10511	1.76052	-0.920101	-0.749073	-1.0875	1.31016	1.65184	0.98059	-1.04546	-0.632828	-1.00282	0.295256	0.794272	0.74005	-1.1253	-0.444028	-0.891716	0.278282	-0.0342803	0.274386	-0.871935	-0.625799	-1.16903	1.08185	1.2004	1.52474	-0.722701	-0.793811	-0.780835	1.28188	1.15262	1.51293	-1.05015	-1.16877	-0.847727	0.993598	0.947689	0.48544	-0.90518	-0.950887	-0.880782	0.340595	0.391585	0.135858	-0.971993
ENSG00000152661	P17302	2697	GJA1	0.569965	3.95004	0.849644	-0.344453	-0.107317	-0.546082	0.37618	-0.412215	0.128408	-0.57373	-0.941072	-1.03536	-0.081799	-0.492089	0.654433	-0.638211	-0.0147417	-0.28327	0.0467774	0.0709765	0.64824	-0.125961	-0.490736	-1.20763	1.56853	1.82836	2.25011	-0.535451	-0.994905	-0.189694	0.223596	-0.336755	0.460965	-0.803854	-1.09027	-1.04702	-0.40139	0.302857	0.019806	-1.09666	-0.376786	-1.00052	1.6201	0.803754	0.583241	-0.320882
ENSG00000113389	P17342	4883	NPR3	-0.77806	-0.380432	-1.30611	-0.707577	-0.581735	0.00947337	-1.03888	-0.660202	-0.296163	1.19192	2.40274	2.57911	-0.867728	-0.561816	-0.317601	0.835196	0.673234	0.175561	-0.867419	-0.408357	-0.444053	0.286916	0.263924	0.798043	-0.774145	-0.55686	-0.858015	-0.290847	-0.592151	-0.850995	-1.26805	-1.06959	-1.2637	1.71738	1.97989	1.61953	-0.262443	-0.703414	-0.202004	0.8276	0.827043	0.608321	-0.338553	-0.924788	-0.495531	1.10983
ENSG00000166311	P17405	6609	SMPD1	-1.23743	-0.265354	-1.60652	-0.735085	0.0932259	-0.438972	-2.10147	-0.503793	-1.34506	-0.392754	1.38429	0.689878	-0.217629	-0.331296	-0.234406	0.967379	0.844718	1.00535	0.0526577	0.642792	0.143606	2.17169	0.819339	0.594831	-1.52882	-2.58219	-2.27525	0.289004	0.427001	0.664986	-0.252892	-0.240807	-0.43098	-0.332108	0.194887	-0.456811	-0.0394611	-0.111012	0.197726	1.5211	0.433997	0.568898	0.253943	-0.370804	1.40248	1.0145
ENSG00000099795	P17568	4713	NDUFB7	-2.09336	-0.788667	-0.677717	0.603414	1.04416	0.598569	0.456501	-0.0922015	0.0295581	2.12373	1.73217	1.32734	-1.40203	-0.930129	-0.351175	0.834591	0.0961291	0.336153	-1.02786	-0.149829	-0.244391	-1.12591	-0.0799203	-0.219115	-0.441395	-0.214168	-0.44568	2.43472	0.453766	1.57197	-0.0616111	-0.229959	-1.81356	0.509996	0.602106	0.946919	-2.02397	-0.518073	-1.41838	0.278161	0.359516	0.305897	0.178288	-1.37045	0.143976	0.646085
ENSG00000008056	P17600	6853	SYN1	-1.02705	-1.34195	-1.289	0.886463	1.04738	0.630297	-1.02881	-1.29056	-1.17979	0.777166	0.966988	0.703378	-0.702953	-0.775013	-0.673565	1.19089	1.21265	1.07385	-0.449112	-0.780871	-0.884048	0.99952	0.974811	0.959335	-0.931766	-1.80564	-1.6684	1.16253	1.2026	1.02826	-1.16859	-0.556523	-1.16078	1.06816	0.908133	0.779596	-0.550234	-0.741892	-0.495371	1.03147	0.732536	0.770726	-1.12141	-0.47645	-0.307631	0.770726
ENSG00000072062	P17612	5566	PRKACA	-1.04571	-0.11128	-0.649083	1.06178	2.9747	1.64361	-0.452738	-0.831686	-1.25658	0.49001	0.601249	0.185545	-0.109061	-1.48593	-0.356856	0.287999	0.199403	0.319146	-1.24034	-0.684703	-0.505898	-0.276213	0.61383	0.628807	-0.477116	-1.39425	-0.353838	1.62114	2.48487	1.19787	0.000669938	-0.77623	-0.819518	0.197813	0.183474	0.164285	-1.07654	0.229064	-1.44486	-0.146942	0.537887	-0.263149	0.608808	-0.187574	-1.68088	1.38277
ENSG00000162909	P17655	824	CAPN2	1.14247	1.68744	0.200172	-1.03362	-0.622852	-0.964181	0.585414	1.18312	0.193454	-1.53534	-0.898014	-1.61988	0.901192	0.422618	0.671864	-1.63047	-0.722778	-1.2628	0.308607	0.858974	1.1739	0.454034	0.465876	0.0408083	0.600445	0.243966	0.457366	-1.72685	-0.361338	0.0510235	-0.160093	-0.0975775	-0.01446	-1.08493	-1.25955	-1.36915	1.14177	1.3458	2.00432	-0.23949	-0.52941	-0.455203	0.545487	0.53968	2.24	-0.919304
ENSG00000172020	P17677	2596	GAP43	-0.875347	-1.09219	-0.716229	0.998438	1.0309	0.905922	-0.767456	-1.01672	-1.15529	1.11247	1.32355	0.740775	-0.957308	-0.784565	-0.819905	1.04599	0.890017	0.905079	-0.780142	-1.30416	-1.28463	0.993098	0.758483	0.849226	-0.670732	-1.24349	-1.12216	1.51793	1.21806	1.38708	-0.69596	-0.380328	-0.600447	1.35346	1.24644	1.50463	-0.847107	-0.737075	-0.903886	0.471857	0.530691	0.421725	-1.58475	-1.00627	-0.854955	0.409255
ENSG00000175354	P17706	5771	PTPN2	-1.81037	1.08767	0.936318	0.445031	-0.892287	0.52861	-0.600261	-0.183636	-0.105727	1.1488	0.464452	0.520377	-1.10298	-0.0322427	-0.213998	1.82695	0.838823	1.86001	-1.39632	-0.422898	-0.598313	-1.57687	-0.660796	-0.0603316	-0.443783	-0.876285	-0.287717	0.0759886	0.547932	0.188679	-1.29069	-0.988269	-0.972818	0.478356	0.723434	0.464259	-0.580329	-1.28826	-0.616617	1.90683	1.84148	1.86814	-0.365266	-1.64862	-0.311865	0.430889
ENSG00000171793	P17812	1503	CTPS1	2.36699	0.79739	1.84126	-1.12504	0.222787	0.10393	1.02085	0.799403	0.923687	-1.0612	-1.24952	-1.09621	0.551218	-0.427535	0.251962	-0.578864	-1.15296	-1.00346	0.161855	0.637109	0.152582	-0.18174	-0.947574	-1.0069	1.43767	1.14609	1.58481	0.168228	0.0194876	0.0759635	1.23445	1.19081	1.57917	-1.36836	-1.72206	-1.22485	-0.472254	0.397879	-1.15487	-0.0571026	-0.0372588	-0.147897	0.330257	0.0691274	-1.66158	-0.570349
ENSG00000141959	P17858	5211	PFKL	0.0473484	0.240347	-0.365613	-2.14854	-1.2932	-1.27635	-0.30721	0.216674	-0.507938	-1.57825	-0.394452	-1.20699	0.883997	1.22852	0.719629	-0.442065	0.102886	-0.423441	1.10826	1.26276	1.29581	0.957816	0.992938	0.887068	0.187234	0.0408372	0.510118	-1.33288	-0.84687	-1.06274	0.097251	0.322939	-0.180572	-1.5074	-0.961802	-0.954833	-0.0316944	1.89765	0.31509	-1.05643	0.777023	-0.993669	1.2765	1.99439	0.50022	0.70137
ENSG00000196743	P17900	2760	GM2A	0.0572569	0.702932	-0.139881	-1.24149	-0.253401	-1.56326	-0.250627	0.400689	-1.46834	-0.752755	-0.598824	-1.50526	1.15796	-0.387404	-0.0282298	0.419942	1.27773	0.731979	-0.281755	-0.660675	-0.381909	2.24922	1.52332	0.992781	0.246441	0.719736	1.05992	-1.27617	-0.96349	-1.37434	1.3334	0.91965	0.632265	-1.03814	-1.90892	-1.54361	0.836977	1.19287	0.567288	-1.14396	0.0746277	-0.543271	0.874889	0.575766	0.91965	0.324688
ENSG00000131981	P17931	3958	LGALS3	-1.06882	-0.630533	-1.1904	-0.274831	-0.902222	-0.882127	-0.593791	-0.753468	-0.505147	0.114414	-0.99003	-0.641183	0.711364	1.68338	0.914955	-0.260111	-0.409122	-0.52041	2.08257	1.39666	2.16768	0.0654469	0.28662	0.19911	-0.247912	0.275541	-0.385891	-1.06117	-1.06117	-1.06117	-0.25271	-0.28197	-0.126064	-1.06117	-1.06117	-0.224248	1.41033	1.9568	0.609968	-1.06117	0.165592	-0.489184	2.03323	1.45434	1.52933	-0.0925336
ENSG00000120438	P17987	6950	TCP1	-0.839395	-0.340739	0.0131686	0.474783	0.952385	-0.380427	-0.548102	-0.604588	-2.00399	1.36956	1.20893	0.600494	-0.967439	-0.707001	-0.50117	2.14705	1.15801	1.28789	-0.639739	-1.05429	-1.17138	0.574405	0.0214016	-0.0498261	-1.12413	-0.240127	-2.52306	0.519322	-0.260894	0.277755	-1.24178	-0.541139	-0.980461	0.212141	0.598604	0.4018	0.0783874	-0.406407	-0.514272	1.49364	0.925178	1.9564	-0.7392	-0.646501	0.624671	0.312995
ENSG00000196396	P18031	5770	PTPN1	-0.714371	-0.964017	-0.972191	1.47597	1.42852	1.22461	-0.560459	-1.14835	-0.820045	1.6719	1.18551	0.745158	-0.767414	-0.874519	-0.905475	1.24197	0.779445	0.711429	-1.02575	-0.830486	-1.10069	0.227546	-0.01228	0.00397699	-0.570604	-1.35497	-1.34968	1.10418	1.11958	0.803662	-0.810121	-0.723882	-0.98904	0.94823	0.596414	1.42803	-0.332252	-1.8876	-0.159054	1.2605	0.349982	0.972504	-0.735746	-1.30515	0.0328042	0.343903
ENSG00000115457	P18065	3485	IGFBP2	1.15034	1.10185	1.26043	-0.295903	-0.154952	-1.88554	-0.0963717	-0.0962576	-1.21453	-1.20349	-1.09388	-1.65025	0.434441	2.48938	-0.0802756	-0.381711	1.22881	-0.0320498	0.199058	-0.344978	0.192168	0.287628	0.112158	0.0739244	1.38093	1.57499	1.31804	-0.657071	-0.721475	-0.841371	0.720407	1.12898	1.09715	-0.645939	-0.442626	-0.751955	-0.123626	0.560583	-0.760307	-1.72214	0.554216	-1.60725	0.642369	0.85423	0.288064	0.514125
ENSG00000147604	P18124	6129	RPL7	0.073426	0.750323	2.21781	0.435476	0.0659334	-0.558284	1.50284	-0.183584	0.953127	1.42947	-0.810594	-0.355574	-0.0449813	0.534218	-0.130671	1.065	-0.849113	-0.114151	-0.791871	0.0222184	-0.415156	-1.9211	-1.13377	-1.74098	1.07135	1.93482	1.34609	-1.44538	-1.8069	-1.35416	0.709761	0.128381	0.916193	0.0618255	-0.358497	-0.933936	-0.275139	-0.686703	0.959583	-0.156082	-1.31933	0.069911	1.04762	0.468085	1.13766	-0.494172
ENSG00000035403	P18206	7414	VCL	0.917527	0.851805	0.378804	-0.862489	-1.23519	-1.20494	1.98756	1.63481	1.34314	-1.21866	-1.27746	-1.25727	0.833074	1.09434	0.620938	-1.00033	-0.615747	-0.608238	-0.486165	0.0427031	-0.194848	0.0295607	0.351409	-0.124334	0.799421	0.0394371	0.891753	-0.433687	-1.03846	-0.831659	1.36143	1.34379	1.14104	-1.27531	-2.29198	-1.17355	1.39787	1.47924	0.631569	-0.173788	-0.31155	-0.538393	0.362454	-0.648027	0.318724	-0.273651
ENSG00000159140	P18583	6651	SON	0.965521	1.41313	1.02421	1.52374	0.185285	0.15681	1.14211	1.51515	0.855987	1.0033	0.146305	-0.645747	-0.348305	-0.0431486	-0.500095	-0.831482	0.105661	-0.33552	-1.023	-0.687586	-1.04573	-1.75211	-1.3713	-1.45318	0.947034	-0.00530768	-1.08087	0.129097	-0.0717095	-1.63144	0.405917	0.0875096	0.764855	-0.199902	-1.09641	-0.797464	0.78069	0.961915	1.70371	-0.0458986	-1.26941	-2.12059	1.24111	1.26503	0.467814	-0.621537
ENSG00000171314	P18669	5223	PGAM1	0.195195	-0.948188	0.0711517	-1.18745	-0.982264	-1.88967	-0.023135	-0.359252	-1.17575	-0.513802	-1.41355	-1.42234	1.03474	1.61945	0.491563	-0.170394	0.947611	0.161257	1.01972	0.585057	0.861062	1.28771	0.856357	0.95491	1.14166	0.832503	0.937838	0.906014	0.814968	0.695551	0.909883	1.33566	1.18156	-0.454751	-0.481846	0.00108639	-1.19381	1.1549	-0.912122	-1.70767	-0.211432	-1.56674	-0.101727	0.297632	-1.09326	0.101767
ENSG00000180198	P18754	1104	RCC1	1.45856	1.85066	1.17283	-0.5951	-1.4165	-1.23046	-0.301505	1.83978	0.0403374	-0.910042	0.0747324	-1.34015	1.25661	-0.390198	-0.0921422	-0.656832	0.613595	-0.499648	0.455737	-0.481966	0.0027446	1.03546	-0.969719	-0.916783	1.32808	1.18242	1.4169	-0.770332	-0.694136	-0.953236	1.08798	0.761731	1.17719	-0.55042	-1.48405	-1.40727	0.0369576	1.18716	-0.415799	-0.677472	-0.897908	-0.892177	1.34121	1.24819	-0.80962	-0.517315
ENSG00000105486	P18858	3978	LIG1	1.20611	1.21777	1.35889	-1.00435	-0.909897	-0.963921	0.797153	0.803473	0.799727	-1.14233	-1.16934	-1.22197	0.869412	0.655871	1.0395	-1.03783	-0.780904	-0.837194	0.964045	0.920534	0.926483	-0.859557	-0.769134	-0.862537	1.13789	1.24401	1.22809	-0.788646	-0.760633	-0.607448	1.57631	0.913998	1.07522	-0.316884	-1.92902	-1.28218	-0.021374	1.14582	-0.443673	-0.478066	-0.827962	-0.191865	0.818558	1.1503	-1.14934	-0.979848
ENSG00000154723	P18859	522	ATP5PF	0.109463	-1.00424	-1.91345	0.103003	0.233656	-0.233025	0.160024	-0.244948	-1.07923	1.60836	1.40563	1.153	-0.406829	-1.49035	-0.447544	2.1676	0.685767	0.673322	-0.925644	-0.890574	-0.765458	0.735697	0.223059	0.142717	-1.29935	-1.46967	-0.844612	1.48208	0.726581	0.947983	0.565045	0.525891	-0.345067	1.20328	1.67303	1.27765	-1.54698	-0.44854	-1.92144	0.211185	0.162108	-0.324605	0.0435449	-0.109419	-1.06037	0.359764
ENSG00000073050	P18887	7515	XRCC1	1.60505	-0.00246173	0.559521	0.299673	0.0148008	0.674584	1.51312	0.942999	2.16355	-0.748423	-0.717769	-0.858568	0.307508	0.383093	0.564103	-0.976717	-1.4736	-1.15267	-0.148404	-0.141897	0.704517	-1.44565	-1.27449	-0.791868	0.889547	2.14334	1.73697	-0.53667	0.66672	-1.20574	1.68591	0.351567	0.497736	-1.98472	-0.831421	-0.51553	-0.431814	0.697313	0.293424	-1.00841	-0.589268	-0.618298	-0.549145	0.33472	-0.00628434	-0.905776
ENSG00000145730	P19021	5066	PAM	0.506003	0.990041	0.798688	-0.670244	2.78587	1.50363	-0.660889	0.0758201	1.05923	-1.12779	-1.5578	-0.210351	0.291234	0.159248	0.44712	-0.758283	-1.43175	-1.00247	0.204899	-0.410645	0.24171	0.231691	-0.808608	-0.656368	0.523438	0.565429	0.771141	0.748373	1.87345	1.1628	0.282291	0.338172	0.44413	-2.14795	-2.36451	-2.00793	0.146087	0.438665	0.192119	-0.502855	-0.091498	-0.728729	-0.628143	-0.0164969	0.419794	0.0678942
ENSG00000170558	P19022	1000	CDH2	0.475068	2.37794	2.40091	-0.170999	-0.523285	-0.800801	0.991848	0.337344	0.414794	-0.791955	-0.674762	-0.886344	0.692494	-0.118861	0.540543	-0.954967	-1.14775	-0.317163	-0.258426	0.825457	0.583999	-0.872745	-1.22624	-0.896098	1.4648	0.992998	2.13801	0.136697	-0.0169078	0.351284	0.766206	0.738416	1.03818	-1.68729	-1.60462	-1.11764	0.0871804	-0.0117498	-0.0964362	-1.13713	-0.806687	-0.992935	1.30778	0.33059	0.204223	-0.613953
ENSG00000128266	P19086	2781	GNAZ	-1.04646	0.309184	-0.231739	0.86478	1.04462	-0.245107	-0.271278	-0.275806	-2.32163	0.386103	0.700586	-0.941343	-0.914174	-0.521392	-1.3551	0.59706	1.3947	0.822045	-0.342287	-0.602222	-0.900484	1.8249	0.697738	1.3273	-0.991659	-1.04587	-0.888985	1.05721	1.21745	0.981551	-0.834903	-0.635966	-1.08172	1.13943	1.11828	1.1998	-1.18721	-0.938691	-0.817377	0.788399	1.04672	1.0602	-1.26247	-0.778091	-1.04587	0.580601
ENSG00000124181	P19174	5335	PLCG1	0.651317	-0.0264605	0.825371	-1.06275	-1.16117	-1.76581	0.0414996	0.347014	-1.68886	-0.89216	-0.202915	-1.53011	1.22286	0.942554	0.101049	-0.80264	0.366775	0.333422	1.75356	0.597859	0.0709171	1.75818	0.463637	-0.343125	-0.750018	-1.00178	-0.871952	-0.362175	-0.528113	-0.831713	-0.115331	-0.631752	-0.222991	-1.20827	-1.01472	-1.11777	1.42651	1.2142	1.94117	-0.851088	0.532055	-0.160594	0.185843	1.6329	1.89013	-0.135504
ENSG00000115053	P19338	4691	NCL	1.09621	0.653589	1.74867	-0.981301	-0.978475	-0.414024	2.0252	1.27577	1.39608	-0.137781	-1.42673	-1.61639	0.540293	0.661479	0.364526	-0.336058	-0.374203	-0.950317	-0.0380172	-0.268378	0.00823612	-0.969834	-0.754001	-0.524545	1.87522	1.03244	1.46321	-0.783161	-1.33002	-0.524229	1.02547	0.779922	1.34016	-1.20884	-1.49539	-1.1323	1.16238	0.664668	-0.235073	0.399161	-0.809518	-0.783013	0.168381	0.493795	-0.354916	-0.125958
ENSG00000156515	P19367	3098	HK1	-1.33528	-0.478003	-1.04174	0.349588	0.387189	0.0410811	-0.976211	-0.604915	-1.03018	0.37261	0.320154	0.207265	-0.723662	-0.504922	-0.538129	1.23038	1.58122	1.05381	-1.06014	-1.0598	-0.949758	1.80405	1.45218	1.50321	-0.969149	-1.15254	-0.197142	1.62462	1.75607	1.519	-1.032	-0.721935	-0.914265	0.343143	0.47648	0.770983	-0.856187	-0.700451	-0.79783	0.32058	1.41291	-0.112547	-1.09093	-0.871822	-1.08644	1.2568
ENSG00000102978	P19387	5432	POLR2C	1.20473	0.856774	2.06321	-0.690277	0.117204	-1.6872	0.240385	0.934198	-0.220333	-1.87243	-0.539928	-1.94106	0.595862	-0.141021	0.967463	-1.09135	0.388606	0.816091	0.725847	0.293247	0.193356	-0.616557	-0.0253197	-0.571502	0.474737	-1.04521	0.0982907	-1.28556	-1.98183	-1.05958	0.580273	-0.0287565	1.55235	-1.91443	-0.781776	-0.877497	0.690185	0.942163	-0.0744337	0.839853	1.05253	-0.693944	1.34186	0.361972	0.413108	1.15301
ENSG00000178127	P19404	4729	NDUFV2	-0.826077	-0.457476	-0.284565	0.357724	0.217504	0.158237	0.264535	0.0125729	-0.951456	1.6029	1.92113	0.906335	-0.783425	-1.5407	-0.825039	1.84075	0.821254	0.916232	-1.03767	-1.53997	-1.11804	0.654508	-0.0424786	-0.266782	0.894464	0.569778	0.859776	1.44835	1.21979	-0.388631	0.471445	2.15533	0.163159	0.90372	0.611894	0.40153	-1.49918	-0.431497	-0.923524	-1.76195	-0.0957449	-1.23037	-0.146481	-0.129159	-1.39486	-0.125253
ENSG00000055332	P19525	5610	EIF2AK2	0.699819	0.799474	1.32446	-1.32	-1.86032	-1.10172	0.972177	1.57556	0.324223	-0.923177	-0.834714	-1.09776	1.28022	0.924671	0.660229	-0.377365	-0.884871	-0.94171	1.10476	0.440001	0.435296	0.224983	-0.675469	-0.748779	0.279225	0.499592	0.968924	-0.548223	-1.74409	-1.65649	0.67198	0.58679	0.411528	-1.3833	-0.96553	0.00919559	1.64085	1.43359	0.72012	-0.468868	-0.852353	-0.882079	1.06664	1.25663	0.426352	0.362937
ENSG00000116649	P19623	6723	SRM	-0.513382	-0.469381	-0.349549	-0.879435	-0.619883	-0.497992	-0.561686	-0.590547	-0.353107	-0.653408	-0.564439	-0.359871	-0.545656	-0.482328	-0.294395	-0.0801561	0.110563	0.388651	-0.153106	0.00344287	0.0558124	2.16826	2.8112	2.4304	-0.803608	-1.24137	-0.550653	-0.0589296	-0.912102	-0.428918	-0.42333	-0.682395	-0.291865	0.410195	0.319163	0.0802698	-0.583348	-1.30419	-0.197074	-0.0849335	0.637613	0.377066	-0.312369	-0.376722	-0.0191579	2.10247
ENSG00000070961	P20020	490	ATP2B1	1.67458	1.91409	0.880422	0.282532	2.19474	0.163142	-0.898596	-1.08012	-1.10622	-1.20687	-1.18146	-0.980865	1.34531	-0.958745	-0.523185	-0.365996	-0.370842	-0.0326804	-0.54768	0.176886	0.0189403	0.179644	0.426617	-0.00364475	0.868398	-0.361745	0.578486	1.58733	2.44102	1.35439	-0.465685	-0.151085	0.329968	-0.0631659	-0.730466	-0.37854	-0.461135	-0.805551	-0.287672	-0.0375739	-0.254253	0.701547	-0.220335	-1.42638	0.500694	-0.27907
ENSG00000138279	P20073	310	ANXA7	-0.223035	0.948945	0.050178	-1.54313	-2.52235	-1.58927	0.611418	1.4738	0.120522	-0.869504	-0.27877	-0.73226	0.761118	1.18253	0.878742	-0.579557	0.109415	-0.321566	1.00453	0.959562	1.22944	-0.284459	-0.350455	-0.0358512	-1.28662	-0.258876	1.14212	-1.18734	-0.505324	-0.178093	0.527391	-0.00782312	0.278651	-0.661125	-0.278059	0.505241	1.59321	1.47374	1.896	-0.279661	-1.05649	-1.59986	0.412911	0.230723	1.37529	0.272864
ENSG00000145386	P20248	890	CCNA2	1.08776	0.96048	1.26551	-0.58457	-1.65281	-0.824672	0.775509	1.18854	0.673769	-0.603886	-1.30729	-0.878874	0.823195	0.8072	0.881437	-0.497415	-1.19661	-0.812478	0.988913	1.11719	0.640132	-0.468422	-1.39843	-0.984192	1.25169	1.34676	1.24847	-0.487223	-0.643844	-0.47596	1.00524	0.978869	1.01972	-1.05544	-1.38971	-0.83587	0.652093	1.08148	0.240333	-1.03219	-0.942148	-1.02458	1.11151	1.07319	-0.0164586	-0.749019
ENSG00000198914	P20264	5455	POU3F3	-0.646643	-0.610081	-0.81229	-1.021	-1.47212	-1.47711	0.135174	1.23383	-0.508235	-1.13007	-0.851732	-1.80027	0.264889	0.549524	0.86314	-0.194938	1.19793	0.952287	0.778219	0.291068	0.628035	0.962395	1.17771	1.4903	-0.0858557	-0.0203755	-0.442359	-1.04319	-1.09132	-0.943318	0.422851	0.514302	0.214303	-2.11477	-1.93	-2.07584	0.766631	0.741866	0.781296	0.345107	0.549035	0.397207	0.583616	0.837385	0.867174	0.910295
ENSG00000184486	P20265	5454	POU3F2	-0.844494	-1.36139	-1.29853	-0.455223	-1.30605	-0.724323	-0.199374	-0.0918252	-0.254604	-0.599495	-1.58589	-1.17752	0.460141	0.522035	0.462752	-0.170732	0.31486	0.265855	1.47505	0.986651	1.21373	1.34512	1.64679	1.37646	-0.286718	-0.388515	-1.15423	-0.868096	-0.200472	-0.279501	-0.0477452	0.0804575	-0.606357	-1.93799	-1.81147	-1.91184	0.759281	0.727313	0.814991	-0.0655333	0.451587	0.0975326	1.04913	1.20801	1.03245	1.23792
ENSG00000145741	P20290	689	BTF3	0.82384	0.250033	1.30491	0.12565	-1.0722	-0.194419	1.64014	-0.209519	1.72832	-0.75634	-1.92856	-0.979026	0.334516	-0.0585265	0.646708	1.63911	-0.156597	-0.679572	0.602366	-0.346201	0.638564	-1.00203	-1.08421	-1.26696	1.03078	1.81488	1.3929	-1.36716	-1.21643	-1.03243	1.23492	0.814136	0.289567	-0.22401	-0.597875	-0.996603	-0.017995	-0.115875	-0.214284	-0.178402	-1.03346	-0.16232	0.638489	1.39494	1.36315	-1.01777
ENSG00000105649	P20336	5864	RAB3A	-1.54263	-1.46612	-1.48117	1.35872	0.935533	1.07442	-0.502962	-1.42572	-0.691972	1.75216	0.607755	0.588144	-0.821865	-0.357489	-0.548717	0.796209	0.639442	0.644534	-0.599156	-0.415804	-0.656592	-0.04254	1.06816	1.08766	-0.916446	-1.09521	-1.52469	1.32688	1.30349	1.10798	-1.18941	-0.531398	-1.00397	1.19962	1.21407	1.19358	-0.715056	-1.02134	-0.684152	0.677691	0.83984	0.691617	-1.13626	-0.77273	-0.630601	0.573479
ENSG00000144566	P20339	5868	RAB5A	-1.39036	-1.1131	-1.93785	-0.801483	-0.718142	-0.876339	1.24873	0.55914	-0.873899	1.34133	0.639531	-1.46288	0.119098	0.0625417	-0.592589	0.202254	1.54598	-0.173493	0.691485	0.423804	-0.120454	1.1558	1.3354	0.735499	-1.18637	-1.35962	-1.78705	-0.794755	0.141268	-0.0652983	-0.65723	-0.10943	-0.996947	-1.12619	-0.855597	-0.407564	1.91616	0.602455	1.87411	0.419357	0.30773	0.226832	0.54655	0.21985	1.44111	1.24036
ENSG00000178741	P20674	9377	COX5A	-1.77731	0.993957	0.505862	1.6659	0.426159	0.335498	-1.22609	-0.907318	-1.95466	-0.0274651	1.25609	-0.105577	-1.06275	-0.995719	-0.78668	0.824047	1.39681	1.1529	-0.10194	-0.0991209	-0.536166	-0.0037632	0.871837	0.155495	0.172215	0.376776	-0.0528606	1.67215	0.98407	0.891576	0.692688	0.113927	0.0421623	1.28406	1.10449	1.2661	-1.1576	-0.37229	-2.41766	-0.179694	0.298319	0.105215	-0.965335	-0.407503	-1.80536	-0.710369
ENSG00000153113	P20810	831	CAST	1.31034	1.36884	0.874143	-0.911745	-0.52577	-1.26293	0.492392	0.625722	0.0870421	-1.19595	-0.239408	-2.13324	1.28325	0.745932	0.733138	-1.26608	-0.608873	-1.26963	0.348322	0.742577	0.966448	0.381546	0.446283	-0.992352	0.488999	1.20914	1.07315	0.0750551	0.971701	0.429972	0.262326	0.271638	0.474108	-2.34262	-1.68603	-1.64207	0.80874	1.13074	1.00301	-0.899804	-0.560469	-0.638953	0.651616	0.2176	0.880721	-0.266661
ENSG00000038002	P20933	175	AGA	-2.08559	-0.773582	-0.361243	-1.54045	-0.436217	-1.01855	-0.396209	-0.443882	-0.116504	-0.750667	-0.47624	-1.34221	0.85666	0.409364	0.583408	0.330671	0.45921	0.642305	0.0823497	0.669051	0.734623	1.55515	1.96507	1.45349	0.369819	1.29522	0.723358	-1.32972	-1.40393	-1.92248	0.825843	0.805199	0.745952	-1.21269	-0.193248	0.189902	1.26511	0.472569	1.31609	0.0527547	-1.53074	-0.520823	0.279249	-0.224655	1.19959	-0.628107
ENSG00000145715	P20936	5921	RASA1	0.0135754	-0.00368331	-1.13443	-0.996092	-0.0386661	-0.135333	-1.36857	-0.785349	-0.723775	-1.50869	-0.630646	-0.277988	0.430369	-0.564371	-0.287674	-0.480435	0.124175	0.595969	0.440452	1.15666	0.440206	2.59883	1.14756	1.98791	-0.664899	-0.834505	-1.00144	-0.538378	0.980164	0.494936	-0.978157	-0.717801	-0.365973	-1.97507	-1.38677	-1.38449	0.557091	0.111233	0.714186	-0.00177965	0.457596	-0.352876	0.818529	1.37957	1.10603	1.37957
ENSG00000159335	P20962	5763	PTMS	-1.59829	-1.09919	-1.34894	0.615273	0.375681	0.463152	-0.911964	-0.998436	-0.671205	0.702689	0.696666	0.976732	-1.05505	0.149058	-0.596395	0.774482	1.09158	1.12243	-1.02174	-0.664539	-0.993679	1.59099	1.05364	1.34707	-0.932346	-0.863936	-1.15476	0.748694	-0.268865	0.198219	0.699064	0.104099	0.695091	1.80941	1.14093	1.11546	-2.31265	-0.165458	-1.64085	-0.175863	0.69783	0.0286705	0.126747	0.39138	-1.55214	0.965687
ENSG00000105894	P21246	5764	PTN	-0.658287	0.600672	0.0132064	-1.05475	-1.44685	-1.01199	1.01635	0.557161	1.3547	-1.64497	-0.304712	-0.750313	1.12305	2.01204	1.48753	-0.280796	-0.687747	-0.813632	0.873579	-0.162188	0.948749	-0.505515	-0.848743	0.183455	-0.392243	-0.895689	-1.05107	-1.36445	-0.721458	-0.893065	1.22076	1.38213	0.238446	-0.573664	-0.844274	-0.601793	1.67344	2.35636	1.50443	-0.0462004	-0.506476	-0.120424	0.24077	0.429526	0.721296	-0.769454
ENSG00000147416	P21281	526	ATP6V1B2	-1.42967	-1.28703	-1.34848	0.679954	0.858846	1.15331	-0.614599	-1.28537	-0.417509	1.48836	1.06835	1.47871	-0.886238	-0.441597	-0.639211	1.48319	0.567511	0.779287	-0.718104	-0.954103	-0.729772	0.395202	0.0447919	0.75417	-1.04704	-1.9033	-1.53217	1.84981	1.41517	1.39104	-0.756437	-0.496109	-0.370485	1.24503	0.953001	1.27007	0.333385	-0.762531	0.123966	0.488092	-0.02515	0.278248	-0.34335	-0.936272	0.0017172	0.223908
ENSG00000155097	P21283	528	ATP6V1C1	-0.826942	-0.781204	-1.39713	0.865866	1.10563	0.550571	-0.571649	-0.793217	-1.34213	1.90064	1.55828	1.35893	-0.387142	-0.643606	-0.752374	1.41516	0.595599	0.35588	-0.750428	-0.913762	-0.89613	0.921775	-0.33624	-0.236371	-0.574785	-1.02217	-0.987782	2.02334	1.13257	0.204084	-0.930535	-1.56036	-1.89546	1.20754	1.15315	0.668337	1.25299	-0.566671	0.930103	0.463363	-1.06419	-0.0121192	-0.56343	-0.468984	0.468993	0.443281
ENSG00000196924	P21333	2316	FLNA	0.83256	1.26149	0.8061	-1.00083	-1.15849	-0.907498	0.870637	0.895209	0.910323	-1.36894	-1.17149	-0.95234	1.12865	0.824604	0.848652	-1.41597	-0.874233	-0.813122	1.0476	0.921371	1.09193	-0.754481	-0.404556	-0.617181	-0.307395	-0.206808	0.0458731	-2.08006	-2.55568	-1.5404	0.348258	0.490024	0.500461	-0.616322	-0.676913	-0.859899	1.01562	1.33174	1.0505	0.281542	0.63766	0.034592	0.690908	1.0922	0.959871	-0.318696
ENSG00000122729	P21399	48	ACO1	0.128236	1.13813	0.947546	-1.64075	-1.24096	-0.854341	0.808874	0.774021	0.664471	-0.961765	-0.872842	-1.04714	0.867	0.884064	0.904237	-1.32516	-0.906239	-0.802173	0.515405	1.32392	1.4336	-1.25362	0.27242	0.243071	0.949538	0.679765	1.44751	0.373637	-1.13046	-0.618974	1.02857	1.15811	1.52825	0.903404	0.265199	0.843028	-0.705272	0.261648	-0.772491	-1.63342	-0.893699	-0.932546	0.880877	0.557007	-0.786549	-1.02645
ENSG00000118432	P21554	1268	CNR1	-1.14943	-0.219919	-0.0890514	-0.0616148	-1.04297	-0.180069	-0.534666	-1.35587	-0.565435	0.64921	0.609552	0.238283	-0.659994	-0.521256	-0.965347	0.954227	0.898335	0.896324	-0.615104	-0.994809	-0.467232	2.80591	0.563177	1.80776	-1.65688	-2.44983	-2.40493	0.0878882	0.406868	0.260755	-0.931471	-0.163377	-0.856791	-0.0598869	0.142044	-0.0268498	0.472761	0.14564	0.490886	0.790487	0.937923	0.679772	-0.0898262	0.453121	0.485442	1.05193
ENSG00000067715	P21579	6857	SYT1	-0.998605	0.341708	-1.52316	0.456062	0.744776	0.703882	-1.16519	-1.45373	-0.227314	1.40911	1.65587	2.12914	-0.754253	-0.872407	0.0798535	0.457962	0.44708	0.694045	-1.17746	-1.12213	-0.441218	0.16603	-0.179852	0.629787	-0.861622	-1.12796	-0.701457	1.23163	1.20119	1.12108	-0.999015	-0.583133	-0.832689	1.68815	1.76446	1.62743	-0.500316	-1.20961	-0.598318	0.459458	0.644368	0.32725	-1.09841	-1.13289	-0.572575	0.0844651
ENSG00000147133	P21675	6872	TAF1	0.815253	-0.491421	-0.654201	-0.567039	-0.572068	-0.989171	0.532886	0.803737	0.266779	-0.682092	-2.60531	-1.05414	0.866971	1.2237	0.780141	-1.09609	-0.953258	-0.0926642	0.6128	2.05083	0.596042	0.152415	0.827639	0.228251	0.335403	-0.181365	-0.587457	0.805586	-0.353599	-0.134152	-1.45752	-1.90147	-0.798096	-1.11511	-0.695796	-1.75889	0.322696	0.00730872	1.49412	-0.133213	-0.579151	0.440744	0.716344	1.22765	0.651381	1.0415
ENSG00000167588	P21695	2819	GPD1	-1.05357	-0.913329	-1.25582	-0.285445	-0.328095	-0.448761	-1.73242	-1.60535	-0.289872	0.552863	0.635007	0.674989	0.948348	-0.423502	-0.339578	0.737256	0.392242	0.515056	0.378968	2.90118	1.18918	0.185338	-0.240815	-0.19387	-1.46482	-1.06373	-1.37901	0.638308	0.340989	0.753359	-1.00396	-1.00396	-1.36083	1.08228	1.30253	1.49398	-1.23356	-0.577904	-0.334336	0.337299	0.132173	0.0484075	1.83917	1.49147	-0.124552	0.178175
ENSG00000110492	P21741	4192	MDK	0.676467	0.591973	-1.07688	1.47813	0.556266	1.343	0.447116	-1.35323	-0.115567	-1.17718	-1.54853	0.125307	1.71155	-0.163749	-0.523325	-0.396793	-2.39042	-0.0371671	1.23006	0.270396	0.382661	0.164705	-0.163421	-0.0313613	0.682075	0.723534	0.637598	-1.48571	-1.68415	-1.05765	0.565303	0.451213	0.441039	-1.73734	-1.81735	-1.70962	0.739642	0.948729	0.821379	-0.354464	-0.0303692	-0.063868	1.06401	0.820872	1.02937	0.32711
ENSG00000213585	P21796	7416	VDAC1	-1.67588	-0.347595	-0.727652	-0.147267	0.355553	0.445519	-0.392453	-0.609636	-0.737121	1.16486	0.212773	0.63478	-0.89344	-1.61706	-0.537224	1.48899	1.46977	1.0955	-1.25476	-0.985015	-0.493121	1.01544	1.20022	1.33481	0.501688	0.0518456	0.320864	2.03413	1.85923	2.02654	-0.0539702	-0.199013	-0.167845	0.355947	0.0178964	0.414171	-1.38582	-0.682657	-1.65191	-0.302675	0.502918	0.0598086	-0.571824	-0.346714	-2.01563	0.257879
ENSG00000010278	P21926	928	CD9	1.29333	0.030472	-0.00115168	-0.184404	-1.1769	-0.913073	-0.940389	-0.386893	-0.361649	-1.65391	-1.22602	-0.831365	1.62482	1.5826	0.921196	-0.624772	-0.513945	-0.582136	1.29056	1.28504	1.56131	-0.379183	0.289102	-0.102623	1.00439	1.19614	1.06518	-0.692233	-0.865085	-1.03121	-0.0455572	0.468128	0.412801	-1.1939	-0.721167	-1.1939	0.838591	1.49436	0.323887	-1.1939	-1.1939	-0.912845	1.50201	1.70441	0.645573	-0.172321
ENSG00000146085	P22033	4594	MMUT	-0.822807	-0.853023	-1.49338	-0.350275	-0.569925	-0.176488	1.13987	0.63784	0.7511	2.10441	1.56025	1.68048	-0.230974	-0.958597	0.290641	1.47158	-0.364938	-0.160566	-1.15924	-0.56553	0.331447	-0.962516	-0.693721	-0.605645	-0.0257514	-1.30379	0.418824	0.689332	0.987587	0.826666	-0.48197	0.125976	0.770266	0.0114952	-0.391107	0.297808	1.65185	0.646605	1.37101	-1.51608	-1.21532	-0.547045	0.720726	-0.0611334	1.28239	-0.998268
ENSG00000110048	P22059	5007	OSBP	-0.854148	-0.850887	-2.06999	-1.43186	-0.647599	-0.389972	-0.216378	-1.03784	-0.458713	-0.25022	-0.0404014	-0.140291	-0.188808	-0.0699667	-0.115298	0.986071	0.460078	-0.267707	0.308445	2.1198	0.652973	1.80357	1.37674	1.3224	-1.15752	-1.21839	-0.966303	-0.0939643	0.0614803	-0.154487	-1.31087	-0.963957	-1.16368	-1.36249	-0.312019	-0.290249	2.00664	-0.217901	1.95427	0.605159	0.0124819	0.341528	0.766492	-0.200503	1.40574	0.772508
ENSG00000120265	P22061	5110	PCMT1	-1.24728	-1.34911	-0.920239	0.696316	1.33582	0.595865	-0.609064	-0.780158	-1.46738	1.21482	0.761625	0.657979	-0.889943	-0.463381	-0.894506	1.48804	1.15162	1.29229	-0.808013	-0.595904	-1.08074	0.37076	0.686876	0.853715	-0.719056	-1.07041	-0.605792	1.74446	1.40583	1.21623	-0.649497	-0.773597	-0.690116	1.35195	0.985752	1.96403	-1.05548	-0.943177	-0.248947	0.244032	0.370734	0.684105	-1.18161	-1.07148	-0.966708	0.263255
ENSG00000128050	P22234	10606	PAICS	0.905817	1.68482	1.58413	-0.664611	-1.26001	-0.90222	1.08168	1.10552	0.675256	-0.547526	-0.726984	-1.20916	0.409982	1.04325	0.585083	-0.950193	-0.547323	-1.03677	0.715359	0.693994	0.635087	-1.06954	-1.08929	-1.11634	1.48668	1.2942	1.66361	-0.623855	-0.0825203	-0.471808	1.04116	0.923414	1.16833	-0.414178	-0.212312	-0.286443	0.503914	0.866888	-0.126101	-0.98857	-0.865539	-1.32916	0.54208	0.779391	-0.522192	-1.15572
ENSG00000010404	P22304	3423	IDS	-1.09067	-1.00508	-1.84986	0.402389	0.859036	0.244831	-1.21429	-1.14993	-0.966768	0.182042	0.524546	0.212319	-0.627579	-0.645906	-0.374114	1.6037	1.08493	1.15225	-0.438862	-0.557105	-0.24867	1.89107	1.27193	0.739774	-1.292	-1.48306	-1.34295	1.37997	1.04794	1.13733	-0.90054	-0.587188	-1.17795	1.01278	1.06017	1.09548	-0.437566	-0.679714	-0.474271	0.925047	0.87911	0.740624	-1.18455	-1.09543	-0.524175	0.655059
ENSG00000116171	P22307	6342	SCP2	0.410856	0.30414	0.733883	-1.57171	-1.40842	-1.19966	0.876275	0.745424	1.08542	-0.290842	-1.00883	-1.18586	0.886285	0.487898	0.824031	-0.340975	-0.412817	-0.567452	1.49917	1.38191	1.50521	-0.769266	-1.01881	-0.965872	0.0085273	-0.0579081	-0.114341	-0.395008	0.198521	-0.173815	1.41237	1.65673	0.807567	-0.702337	-0.424356	-0.791923	0.552858	1.46866	0.0547146	-1.24775	-0.587192	-0.89774	1.44597	1.69154	-0.307262	-0.292843
ENSG00000130985	P22314	7317	UBA1	-0.252323	0.646163	-0.183959	0.616431	1.60511	1.03521	-1.10574	-0.406361	-1.79527	0.685107	1.01588	-0.222899	-0.692283	-0.967245	-1.19727	0.700854	0.890131	0.681555	-1.09655	-1.2212	-1.25512	1.75728	0.22164	0.540869	-0.339919	-1.23281	-0.116145	1.05156	0.821672	0.716452	1.07356	0.555031	1.00529	1.20557	0.782509	0.970946	-0.046777	0.487349	-0.962338	-1.37031	0.296631	-1.7249	-0.198973	1.10605	-0.969165	-1.11728
ENSG00000243678	P22392	4831	NME2	0.457549	0.779585	0.381511	-1.42814	-2.02807	-2.29394	0.971402	0.533867	-1.19682	0.0104275	0.152864	-0.285555	1.58605	0.0103443	-0.340087	1.52693	0.812635	0.357622	0.0434887	-0.185184	-0.776554	1.19407	-0.147467	-0.136531	0.586865	0.875775	0.847524	-0.275695	-2.80442	-0.954609	-0.205548	0.0640633	-0.0374661	1.07265	1.47213	1.54523	-1.24377	-0.599659	-1.34719	0.105339	0.625714	0.967589	-0.741509	-0.572246	-0.144965	-0.140384
ENSG00000158773	P22415	7391	USF1	-0.340983	1.62222	-0.516837	-0.741165	-2.27093	-0.29721	0.0777764	0.457197	0.294481	-1.1388	0.741823	0.395778	0.0631842	-0.79453	0.702206	-0.34485	2.27223	1.21387	0.911292	-0.679756	0.575715	-0.485617	-0.281119	-1.43598	-1.99313	-2.23013	-2.11654	0.58897	0.850854	0.648503	-0.194844	-0.683517	-0.576386	0.961086	0.616247	0.256427	-0.775788	-0.0839637	-0.430196	0.526105	0.701507	0.582122	0.28731	0.0993168	-0.366895	1.2427
ENSG00000172137	P22676	794	CALB2	-0.376896	-0.457552	-0.955577	2.23631	0.699707	1.48296	-0.73948	-1.77659	-0.476657	0.291247	-0.274058	0.608836	1.29786	-0.689004	0.452064	-0.603266	-0.737564	-0.619428	0.178589	2.11967	0.302287	-0.766363	-0.66721	-0.529894	0.127451	-0.308165	-0.161301	2.13448	1.37929	1.93037	-1.11662	-1.01572	-0.863488	0.855719	-0.362064	0.974828	-1.11662	0.247299	-1.11662	-0.98001	-0.51237	-0.700799	1.13614	0.98011	-0.839499	0.26032
ENSG00000142875	P22694	5567	PRKACB	-0.692909	-1.17683	-0.925156	1.02539	1.95129	1.05052	-0.809482	-1.11531	-0.947211	1.16049	1.80235	0.806567	-0.664663	-1.19167	-0.450398	1.13144	0.469208	0.512774	-0.974879	-1.00013	-0.537633	-0.0594325	0.294483	0.341208	-1.42011	-1.55428	-1.23748	1.42599	1.4403	1.13671	-1.18572	-0.8779	-1.16985	1.1423	1.09686	1.30744	-0.374801	-0.842697	-0.237388	0.663436	0.57574	0.573104	-0.959081	-0.637058	-0.121731	0.417802
ENSG00000140740	P22695	7385	UQCRC2	-0.882609	-0.835985	-0.800897	0.30765	-0.413582	-0.0897672	-0.512421	0.491733	0.0959865	1.41215	2.00007	1.61535	-0.897164	-1.66343	-0.951098	1.85459	0.318486	1.00266	-0.985986	-0.627548	-0.899065	0.409508	0.274146	-0.222777	-0.589524	-1.18054	-1.58376	2.37062	1.59914	0.333196	-0.990982	0.244834	-1.0448	-0.0724252	-0.373301	0.810383	-1.04649	0.00984555	1.03782	-0.284239	-0.0194461	0.246663	1.47763	0.215941	-0.80947	0.793859
ENSG00000077942	P23142	2192	FBLN1	0.392738	1.87509	1.24466	-0.30007	-0.871093	1.48889	-0.0697383	0.120845	1.09331	-1.01958	-0.0505741	-0.156291	0.251561	0.603881	0.209509	-1.28417	-2.09655	-1.1085	-0.396677	1.01145	1.15543	-1.18409	-0.877436	-0.0325858	1.00143	0.997121	1.38529	-1.77453	-1.52105	-1.22537	0.61776	0.342493	0.511723	0.113713	0.102338	-0.167245	0.751404	0.954541	0.945721	-1.24357	-0.57069	-1.1773	0.505226	0.806493	1.40784	-1.04567
ENSG00000187735	P23193	6917	TCEA1	0.752913	0.66056	0.202842	-1.3858	-1.05374	-1.33562	0.313304	0.840157	-0.357311	-1.65737	-1.41486	-1.71376	1.38357	1.14503	0.542039	-0.536694	0.0324914	-0.140954	1.53996	0.909284	0.852217	0.756682	-0.434138	0.099193	0.011016	-0.295217	-0.294891	-0.332854	-0.229807	-0.346708	-0.357302	-0.19048	-0.411799	-1.34871	-1.23304	-1.57997	1.61125	0.202889	2.36192	-0.83373	-0.681405	-0.048546	0.743868	0.604078	2.4158	0.22131
ENSG00000091409	P23229	3655	ITGA6	0.595738	1.98216	1.50798	-0.917749	-0.689747	-1.13149	0.888448	1.14218	0.689928	-1.14866	-1.57787	-1.05854	0.940915	0.894209	0.94176	-0.886306	-1.01257	-0.467418	0.408493	0.414507	0.347216	-0.631246	-0.36435	-0.8676	0.892975	0.878765	1.08702	-0.402036	-0.369611	-0.315147	1.16614	0.960369	1.09666	-1.81968	-1.91694	-0.998013	1.07381	1.3828	0.682738	-0.847439	-0.710553	-0.64165	0.700728	0.10479	0.131186	-0.199791
ENSG00000082212	P23368	4200	ME2	-1.32388	-2.04293	-0.890787	-0.94219	-0.0532996	-0.355192	-0.615028	-0.957089	-1.10229	1.70954	1.37001	0.556749	-0.698097	-0.488009	0.0428616	1.65838	0.580313	1.34641	0.263335	1.21621	0.27071	-0.105135	0.617584	-0.0581982	0.763277	-1.55619	-0.862404	-0.66675	-1.8539	-0.578669	-0.855478	-1.26647	-0.615846	-0.615846	-0.243163	0.477955	0.925933	2.22943	0.843432	0.0869937	0.0933365	-0.624314	0.781141	1.28532	0.361063	0.128155
ENSG00000178445	P23378	2731	GLDC	0.551397	0.584839	1.87603	-1.52649	-1.11369	-0.110877	0.895368	1.6484	1.10676	0.241954	0.266156	-0.0279072	0.168387	-0.119666	0.840045	-1.08789	-0.464976	-0.431839	-0.734081	0.83222	0.812653	-1.80967	-1.15794	-1.23918	1.41042	0.943374	1.46897	-1.19667	-1.41399	-0.88888	1.28288	1.28497	1.34713	0.167625	-0.256568	-0.498297	0.0163279	0.79631	-0.324955	-1.15786	-0.244902	-0.505707	0.707453	1.01375	-0.591605	-0.711988
ENSG00000149273	P23396	6188	RPS3	1.40356	1.976	2.37291	-0.409525	-0.275087	0.584327	0.885807	0.718534	-0.0829324	-0.0731787	-0.161093	-1.674	0.0602051	-0.304429	0.0295956	0.390626	-0.0927743	-0.914588	-0.446287	-0.459509	-0.630983	0.0930628	-1.0559	-1.93434	1.44758	2.21252	2.10539	-1.06614	-1.31529	-1.01974	1.06305	0.736024	1.07048	-0.363965	-0.795597	-0.512649	0.192571	0.0279214	0.315405	-0.829697	-0.960399	-0.29941	0.0311546	-0.305835	0.380518	-0.805652
ENSG00000140905	P23434	2653	GCSH	0.483623	1.27696	1.32001	-0.688816	-1.00578	-1.37495	2.38079	1.74931	0.60578	1.08961	0.172436	-0.450951	0.166641	-0.38284	-0.250568	0.440525	-0.442511	-0.930994	-0.454691	0.0584437	-0.621889	-0.942692	-0.867135	-1.33031	1.88624	0.723095	1.46821	0.0182136	-0.544952	-0.925112	1.01288	1.24656	1.66622	-0.369715	-0.849691	0.0182136	0.0472337	0.590051	0.385229	-1.47638	-0.687922	-0.297695	-0.0735141	-0.267529	0.44618	-1.02789
ENSG00000108443	P23443	6198	RPS6KB1	-0.0282218	-0.752785	0.175539	-2.66564	-1.50474	-0.93403	1.05927	0.316138	-0.11763	-1.38637	-1.25478	-0.254799	-0.544205	1.45602	1.08757	0.412912	0.0879803	0.913676	0.63018	0.91728	0.765128	0.713293	0.404312	0.503903	-0.640114	-1.3444	-1.14789	-0.158414	-0.931925	-0.703452	-1.08076	-1.07124	-0.494192	-1.5535	0.0813971	-0.375753	0.780373	-0.994097	0.712342	1.47725	0.559597	1.48023	-0.0641086	0.792753	1.12522	1.22579
ENSG00000144724	P23470	5793	PTPRG	0.659466	1.40799	0.201659	-0.903983	-0.204972	1.8454	0.200137	0.593967	1.81488	-0.311958	-0.662509	-0.0537525	0.611426	-0.257803	0.859786	-1.01434	-0.612807	-1.90977	-0.23057	-1.00106	1.56944	-0.713899	-1.02221	-0.864509	0.680577	0.839696	1.07645	0.709818	1.26556	1.1584	0.476278	0.296155	0.812082	0.641396	0.497957	0.835729	0.316445	-0.125177	0.130379	-1.04024	-1.0979	-0.659623	-0.400422	-0.601306	-0.230371	-1.20391
ENSG00000106278	P23471	5803	PTPRZ1	1.24071	1.36489	0.888589	-0.755998	-1.75074	-1.38787	0.176758	1.05557	-0.410631	-0.964325	-0.160408	-1.58238	1.22876	0.452448	0.355757	-0.0594657	0.172066	-0.240418	1.6938	0.347216	0.882626	-0.243555	-0.980151	-1.32325	0.184153	-0.0217576	0.312315	-1.11777	-3.33449	-1.03429	0.623928	0.826736	0.384968	-0.280545	-0.182688	0.432129	1.07916	1.37637	0.787304	0.164569	0.0341126	-0.0746033	1.04566	1.10785	-0.102579	-0.967928
ENSG00000101444	P23526	191	AHCY	1.111	0.351222	0.816841	-0.858436	-1.00011	0.0142786	1.35111	0.352973	1.62041	-0.802453	-1.56426	-0.881543	0.705134	0.537707	0.686019	-0.73273	-1.67139	-1.28315	0.676387	1.1747	1.18857	-0.959736	-0.270793	-0.561757	1.58962	1.48893	1.65095	0.320198	-1.43648	-0.934556	1.22131	1.14802	1.45793	0.329488	-0.649709	0.252895	-0.829104	0.559897	-0.789331	-0.463018	-0.807779	-0.371912	0.346597	-0.134599	-0.996784	-0.85755
ENSG00000063046	P23588	1975	EIF4B	0.613556	2.11059	1.17127	-0.190142	-0.137319	-0.828895	0.28571	-0.185185	-1.88706	0.00929939	0.142632	-0.788864	-0.00174182	-0.637652	0.240792	1.50438	1.67754	0.943314	-0.539092	-1.78488	-0.90175	0.401676	-0.844395	-0.373783	-0.350533	0.820095	0.440116	-1.85439	-0.913944	-1.48691	-0.816233	-0.981586	-0.588462	-0.231315	0.284646	-0.85436	1.5309	-0.382387	1.72034	1.15071	-0.24725	1.07295	-0.0696629	0.390333	1.72814	-0.770132
ENSG00000058668	P23634	493	ATP2B4	0.116761	1.99547	1.30608	-1.30218	-1.78616	-1.44396	0.9531	1.47604	-0.178122	-0.120705	0.882385	-0.474982	0.977486	0.397085	0.249576	-0.489277	-0.589169	-0.471093	0.3271	0.635789	0.361553	-1.50344	-0.19414	-1.1252	0.20746	0.572168	0.582248	-0.116179	-1.15439	-0.128782	0.507002	0.569942	0.497933	1.51941	1.56082	1.17813	0.296725	0.652689	-0.401136	-0.371584	-0.241446	-0.23124	0.534742	0.758471	-1.2032	-1.80594
ENSG00000157184	P23786	1376	CPT2	-1.14249	0.383637	0.659321	0.34519	1.22697	-0.926088	2.00436	0.775625	0.190048	1.89142	0.217733	0.605563	0.188684	-1.06538	-0.264689	0.464053	-0.668699	-0.303776	-1.01396	0.224335	0.229232	-1.76884	-0.354049	-1.8982	0.578386	1.22914	1.20696	-0.168064	0.0876072	-0.57813	0.914497	1.04548	1.62324	-1.31016	-1.40188	-1.1414	1.1865	1.12625	0.690609	-1.0022	-1.24009	-1.28664	0.457634	0.540127	-0.179269	-0.720193
ENSG00000168393	P23919	1841	DTYMK	1.2529	0.360793	1.36366	-1.08321	-0.395381	-0.107084	0.295202	0.144276	1.00472	-0.748532	-1.44515	-0.907918	1.22955	0.186529	0.748519	-1.53462	-1.34113	-0.582006	1.34314	1.32303	1.1925	-0.60992	-0.5868	-1.10307	1.63113	1.55775	1.06273	-0.365323	-1.07544	-0.684718	0.888665	1.16326	1.03886	-1.11513	-0.910189	-0.404534	-0.0694931	1.17478	-0.953203	-0.918318	-1.01401	-0.657403	1.27577	1.14729	-0.869985	-0.833435
ENSG00000167325	P23921	6240	RRM1	1.02848	1.11596	1.26381	-0.969239	-1.0721	-0.719357	0.727383	0.939114	0.684984	-0.976235	-1.02533	-1.00549	0.913381	0.675641	0.931631	-0.978615	-0.944619	-0.916079	1.22748	0.982676	1.12194	-0.929879	-1.02813	-1.04741	1.42608	1.29055	1.29947	-0.598026	-0.0692534	-0.732366	1.12317	1.23514	1.20746	-0.80614	-0.949743	-0.57423	0.0860827	1.1168	-0.558986	-1.06078	-0.911292	-1.08969	1.09146	1.11128	-0.712421	-1.0048
ENSG00000131174	P24311	1349	COX7B	-3.12925	0.0136297	-0.206402	1.52564	1.60626	0.801947	-0.898577	-0.597595	-0.397847	0.642393	0.304633	-0.357853	-1.13526	-0.836109	-0.34752	-0.284121	1.10661	0.423739	0.0734502	0.857463	0.190189	-0.607043	0.886371	0.365255	0.012274	-0.722209	-0.169674	1.84419	0.811333	1.34043	-0.228171	-0.0951389	-0.427846	1.15588	1.41696	1.94767	-0.993556	0.532082	-0.982215	-0.182167	0.117776	-0.328762	-0.284511	-0.54138	-1.92779	0.0273778
ENSG00000114942	P24534	1933	EEF1B2	1.04423	1.95249	1.30103	-0.76969	-0.709519	-0.876743	-0.501864	0.098948	-0.921695	-0.689125	-0.0702451	-1.36186	0.296692	-0.369626	-0.602242	1.66381	1.41252	-0.00609715	-0.289903	-0.765398	-1.01908	1.92954	-0.24317	-0.503006	0.981102	1.19924	1.07016	0.420258	-1.85903	-1.3674	0.490564	0.0560452	0.0960545	0.0883054	0.671142	0.710829	-1.54059	-1.18137	-1.21776	0.64093	0.0453465	1.72073	-0.348594	-0.856358	-1.09934	0.0113796
ENSG00000116459	P24539	515	ATP5PB	-1.99531	-1.01685	-0.726901	0.647202	0.665563	0.624305	0.331476	-0.093485	-0.355705	2.3421	1.54238	1.05348	-1.22778	-0.970624	-0.624673	1.10371	0.528006	0.473737	-1.02142	-0.609487	-0.745484	-0.466416	0.482282	0.0598982	-0.934226	-0.579535	-0.795435	1.11222	1.38539	1.52794	-0.106872	1.3814	-0.803883	0.95287	1.61024	1.61676	-0.274478	-0.230959	-1.52132	-0.46349	-0.0701532	0.317757	0.141556	-0.503584	-1.21048	-0.729209
ENSG00000115461	P24593	3488	IGFBP5	0.0272037	-0.642695	-0.888084	-0.580792	-0.829197	-1.26895	-1.1224	-0.826184	-1.11942	2.11951	1.73313	2.06272	0.0888435	0.47127	-0.98292	1.1421	0.420555	0.37535	-0.0783365	0.240822	0.174223	0.428903	0.106917	-1.05258	0.135067	0.539853	0.527777	0.217191	-1.18385	0.0587482	-0.574206	-0.569694	-0.264187	1.71645	1.9043	1.87186	-1.06459	-0.596229	-1.37872	0.553198	0.249159	0.103187	0.925605	0.709183	-1.47828	-0.0729054
ENSG00000075239	P24752	38	ACAT1	-1.36438	-1.6094	-0.733607	-0.286927	-0.515531	-0.267754	-0.26886	-0.593296	-0.552483	1.55159	1.18954	1.29689	-0.727447	-1.01945	-0.570181	1.82953	0.65527	1.06934	-0.902753	-0.29476	-0.818185	0.822523	1.23994	0.870393	-1.27136	-1.89837	-1.56008	0.543407	-0.424949	0.228588	-0.769475	-0.588303	-1.2546	0.823481	1.17763	1.84997	0.209278	-0.880124	0.0985886	0.975951	1.0875	0.722273	-0.87571	-0.354077	-0.431103	0.758353
ENSG00000041982	P24821	3371	TNC	-1.26228	0.379177	-0.0747974	-1.13193	-0.836466	-1.58054	-0.371055	0.10814	-0.191382	-1.95781	0.499608	-0.618657	0.766249	2.11245	0.388469	-1.04476	0.251119	-0.352588	1.64169	1.20739	1.01622	0.160941	0.585299	0.305513	-0.312876	-0.767754	-0.162353	-0.948223	-0.751933	-0.652284	-0.0545737	0.0175584	-0.407229	-1.29039	-1.16307	-0.617849	1.68062	1.31062	1.88973	-0.966846	-0.562667	-0.401429	1.01494	1.11962	2.21455	-0.11412
ENSG00000123374	P24941	1017	CDK2	1.39955	1.08696	0.830338	-1.22073	-1.216	0.107052	0.695454	0.856314	1.35961	-1.26772	-1.48154	-0.297233	0.751461	0.492185	0.831171	-1.33051	-1.0849	-0.485738	0.788922	0.696052	1.01613	-1.12106	-0.993496	-0.412272	1.06069	1.24534	1.2772	-0.867159	-1.3593	-1.06119	1.17678	1.10193	1.09901	-1.05549	-0.911907	-1.12375	0.588253	1.07529	0.0633425	-0.875004	-0.695757	-0.999318	1.12176	1.06821	0.14205	-0.208855
ENSG00000134982	P25054	324	APC	-1.81979	-1.13753	-2.2438	0.258009	0.135758	-0.536362	-0.46272	-0.886794	-0.889151	0.722735	0.797561	-0.810055	0.286601	0.47429	0.100983	-0.700645	0.302087	0.0981758	2.23167	0.517866	0.745174	0.811733	1.02567	0.978532	-1.24924	-2.1751	-1.76329	0.894558	0.197772	-0.0385359	-1.35501	-1.3018	-1.31285	0.097222	-0.178162	0.289126	1.56619	0.583808	0.955022	0.946847	0.169659	-0.0260131	0.208333	0.722539	0.307098	0.880027
ENSG00000173020	P25098	156	GRK2	-1.35576	-1.09081	-0.331032	-0.541123	1.1361	-0.369752	-1.26564	-0.651014	-1.84699	0.297601	1.20912	0.886134	-0.811366	-0.706973	-0.124238	0.709038	0.578143	2.15144	0.0490492	-0.098633	-0.744456	1.38414	0.951224	0.585796	-1.48894	-1.69074	-1.68354	0.199204	-0.309582	0.19493	-0.159217	-0.233348	-1.14655	0.745504	1.47119	0.615114	0.542936	-1.43405	-0.263972	0.744688	0.267363	1.0657	-1.09183	-0.588966	1.01345	0.718075
ENSG00000112118	P25205	4172	MCM3	1.2523	0.883633	1.27164	-0.774481	-1.23519	-0.731153	1.04282	1.20427	1.07216	-0.818095	-1.13876	-0.904634	0.84221	0.80671	0.860418	-0.963402	-0.994432	-0.95087	0.875335	0.673914	0.781336	-0.887487	-1.00875	-1.15949	1.35279	1.25397	1.38631	-0.834817	-0.946894	-0.800643	1.21882	1.10143	1.25586	-1.21285	-1.36716	-1.10467	0.54468	1.05757	-0.0628354	-0.860521	-0.827719	-0.746689	0.898669	0.933756	-0.183005	-0.699213
ENSG00000120837	P25208	4801	NFYB	-0.337311	-0.0722661	1.50591	-0.260917	-1.26884	-0.999672	1.74309	0.79149	0.11285	-0.3242	-1.26346	-2.61672	0.64712	1.19214	0.388678	-0.25753	-0.477207	-0.714376	0.517249	0.980776	1.1767	-0.544419	0.0552107	0.0257043	0.443349	-0.0116473	-0.0400087	-1.64771	-0.958144	-0.228264	0.577687	0.371243	-0.850365	-1.22654	-0.651291	-1.28704	0.724242	0.841575	-0.393408	-0.66104	-0.737169	-0.450323	1.31057	2.49581	-0.162334	1.02949
ENSG00000128309	P25325	4357	MPST	-0.928823	1.39254	0.509152	-0.771574	-1.63437	-0.197359	1.52059	1.7173	1.03913	1.67317	0.323661	0.873623	-1.26463	-0.831125	-0.0831693	0.172183	0.00927343	-0.0185682	-0.505683	-0.140359	0.371917	-1.57539	-0.964459	-0.687032	0.918603	1.76348	1.60483	-0.989571	-1.37747	-1.17977	1.08336	0.707646	1.04228	-0.0975035	0.37827	-0.350566	0.467675	0.661916	0.546044	-0.678815	-0.79955	-0.720637	0.431547	0.323899	0.414517	-1.77989
ENSG00000101680	P25391	284217	LAMA1	-0.18258	-0.477078	-0.459163	1.19964	0.385137	0.786163	-0.474837	-0.467071	0.948581	-2.40006	-0.19862	1.3012	-0.495086	-0.116817	0.367772	-0.58615	-2.71945	0.657717	0.488394	0.893199	0.984116	-0.440106	0.172986	0.832116	1.37269	1.16187	1.06839	-0.560996	-0.191039	-0.323156	0.912527	0.960675	1.01067	-1.53504	-1.09757	-1.08212	0.964598	1.24078	0.654939	-1.29371	-0.822881	-1.38122	0.67559	0.679562	0.0996001	-1.04466
ENSG00000132002	P25685	3337	DNAJB1	0.619098	1.34241	1.50237	-1.16745	-1.34292	-1.26416	1.72483	0.992575	0.985542	-0.643869	-1.1644	-1.46197	0.778344	0.675901	0.627013	-0.0907575	-0.146619	-0.838683	0.348726	0.399117	0.425048	-1.34284	-0.333985	-0.623307	0.610552	2.394	0.0599401	-1.1726	-0.84842	0.182021	-0.312708	0.204112	0.051798	-1.69665	-1.80424	-1.82753	1.31909	1.07048	0.65514	-0.0500639	-0.75148	0.229409	0.65081	0.607203	-0.110553	-0.0492518
ENSG00000135924	P25686	3300	DNAJB2	0.19413	-0.0461533	-0.0727919	0.833474	0.455634	-1.67466	-1.65492	-0.186612	-1.43888	-0.546086	0.373448	-1.64425	0.540086	0.0773728	0.26333	0.646839	0.905572	-0.559143	0.0510642	-0.785789	0.507419	2.8212	0.652223	0.287503	-1.99517	-1.49115	-1.58329	0.416372	1.07479	0.502325	-1.44481	-1.0538	-1.07478	0.683717	0.854366	0.732971	0.182794	-0.263482	0.460167	0.977596	0.776071	1.17366	-1.06834	-0.353035	0.197823	0.435328
ENSG00000152234	P25705	498	ATP5F1A	-1.43806	-0.541012	-0.278622	0.395235	0.59095	0.610522	-0.24932	-0.328814	-0.194791	1.78751	1.76331	1.15879	-1.39256	-1.68576	-0.51612	1.2898	0.830804	1.00752	-1.22829	-0.993689	-0.86278	-0.051903	0.403366	-0.0760831	0.386201	0.128233	1.21401	1.16043	1.68813	2.23986	0.0203159	0.146228	0.143877	1.12256	0.622001	0.683687	-0.325497	-1.18097	-1.00155	-0.253441	-1.2406	-0.901957	-0.511178	-1.15213	-0.035043	-0.826213
ENSG00000105855	P26012	3696	ITGB8	0.750682	0.585456	0.749153	-0.511682	-1.57999	-1.4801	0.996603	1.50049	0.440014	-0.579813	-0.753401	-1.44181	1.23553	1.11945	0.689697	-0.460157	-0.802078	-1.15837	1.18984	0.677158	0.904958	-0.0657782	-0.978697	-1.02715	0.588765	0.235198	0.346475	-0.061339	-0.912929	-0.386605	1.03947	1.18418	0.842077	-1.68051	-2.04015	-0.881938	1.17498	1.26779	0.755888	-0.961421	-0.839181	-0.929593	1.44714	1.17958	0.221303	-0.428058
ENSG00000147065	P26038	4478	MSN	0.062513	0.230042	-0.191864	-1.16039	-1.55602	-0.937241	0.889504	0.46758	0.945546	-1.33518	-1.13206	-1.08729	1.38583	0.93564	0.973385	-1.06866	-0.892271	-0.660086	1.41444	1.37497	1.3801	-0.36257	0.241808	0.0822544	0.629275	0.671667	0.641786	-1.86945	-1.46759	-1.22174	0.964053	0.973082	0.73479	-0.831388	-0.867637	-1.58147	0.91628	1.26165	0.831931	-0.754364	-0.172234	-0.838308	1.24326	1.12757	0.707737	-0.204803
ENSG00000110367	P26196	1656	DDX6	-1.03289	-0.765403	-0.927233	0.0592132	1.04143	1.55001	-0.449951	-0.381013	-0.455959	1.75192	0.264626	-0.057402	-1.42508	-0.808434	-0.523095	1.06314	1.02515	-0.199127	-0.799391	-1.37786	-0.940354	1.89048	0.790034	0.707188	-1.84775	-2.31989	-1.28912	-0.402408	-0.551971	-0.143166	-0.44333	0.0763765	-0.284319	0.0246608	-0.127307	0.454544	0.66037	-0.616712	-0.116228	1.84818	0.595057	0.115866	0.403397	0.72437	-0.776267	1.23071
ENSG00000066032	P26232	1496	CTNNA2	-0.40795	-0.0434017	-0.437584	1.41333	1.48245	1.10852	-1.26698	-1.7941	-1.45555	1.18379	1.16535	0.325545	-0.591332	-1.23623	-0.76545	0.799674	0.376708	0.667864	-1.36242	0.470346	-0.991078	0.612042	0.418234	0.328215	-0.64734	-0.738665	-0.686704	1.26394	1.39439	1.40751	-0.830059	-0.513874	-0.963418	1.38582	1.39873	1.39309	-1.00634	-1.28736	-1.16621	0.576087	0.508277	0.362753	-0.75238	-1.04599	-1.20196	0.326164
ENSG00000130816	P26358	1786	DNMT1	1.07057	1.09248	1.94347	-0.348474	-0.66217	-0.86016	0.755217	0.933982	0.39729	-0.862212	-1.05075	-1.44388	1.13836	0.261602	0.80346	-0.690502	-0.877521	-0.812536	1.19982	0.63641	0.718833	-0.948852	-1.14484	-1.24961	1.3205	0.326224	0.823325	-0.924551	-1.32501	-0.66119	0.581714	0.477216	0.926007	-0.840419	-1.50301	-0.351973	0.688066	0.952887	-1.82284	0.00566406	-0.801437	0.0146705	0.505479	2.25913	-0.45491	-0.647009
ENSG00000007372	P26367	5080	PAX6	0.278356	0.297094	0.648212	-0.351289	-0.199878	-0.218031	1.11387	1.40339	1.57007	-0.896589	-1.33592	-0.882397	0.387924	0.982362	1.08928	-1.44086	-1.1677	-1.15763	0.652734	0.683691	1.38041	-1.49689	-0.935764	-0.404447	0.779019	0.866127	0.693571	-0.311841	0.40656	0.121624	0.811531	0.769478	0.827745	-1.66416	-2.18469	-1.20633	0.912105	0.903415	0.742012	-1.07476	-1.07835	-1.18471	0.986539	0.936497	0.703075	0.0608939
ENSG00000162374	P26378	1996	ELAVL4	-1.33362	-1.75141	-1.57427	1.32241	1.347	0.297438	-0.785533	-0.645082	-1.77158	1.04912	1.77447	0.680397	-0.26249	-0.141336	-0.445454	0.243051	0.854289	0.95611	0.178307	0.34588	-0.874235	0.129411	0.462771	-0.0556505	-0.820569	-1.08919	-1.5968	1.67353	1.87662	1.39193	0.0277135	0.184325	0.0222278	1.07473	0.530793	1.3387	0.215103	0.18394	0.323689	-1.05347	-0.538375	-0.858189	-0.245967	0.654805	0.0953155	-1.1617
ENSG00000128928	P26440	3712	IVD	-0.72112	0.374703	1.01934	-0.699198	-1.56793	-1.01845	1.93186	1.38234	0.676211	-0.284942	-1.164	-0.507701	0.666043	0.0872066	0.76365	-0.241306	-1.69749	-0.337901	0.710083	1.25293	1.14786	-1.17608	0.192483	-0.788596	0.397639	-0.397037	1.05157	-0.150387	0.187066	-0.795793	0.673047	1.71105	1.32232	-1.6411	-1.72191	-0.93102	0.66831	0.94573	1.27464	-1.31773	-0.396224	-0.695815	0.581287	0.667125	0.68073	-1.37368
ENSG00000164104	P26583	3148	HMGB2	-0.716597	-0.309944	-0.206069	-0.956784	-0.636234	-0.122035	0.250643	0.363837	0.973791	-0.988606	-1.27025	-0.730142	0.418189	0.876115	1.59358	-1.5718	-0.66617	-0.202064	1.46909	1.60868	1.95648	-1.24896	-0.232052	0.347306	1.01691	1.12533	0.978056	-0.819678	-1.06598	-0.669688	0.930212	0.902472	0.918641	-1.37898	-1.71691	-0.791917	0.725097	1.10356	0.562104	-1.18818	-0.72212	-0.810995	1.24613	1.2372	0.480867	-0.444256
ENSG00000011304	P26599	5725	PTBP1	0.817386	0.930336	0.800978	-0.787353	-1.02227	-0.692153	1.05605	1.07572	1.3219	-0.958777	-0.955038	-1.07952	0.836727	1.19139	0.812192	-1.22944	-1.08822	-1.11032	0.812885	0.92775	1.01863	-0.871352	-0.855976	-0.951541	1.13391	1.2295	1.63703	-1.58274	-1.48577	-0.983594	0.964274	0.746791	1.16484	-1.00763	-1.24476	-1.14723	0.655093	0.944547	0.115032	-0.630511	-0.120947	-0.848203	1.12801	0.773297	0.0238085	-0.285684
ENSG00000204394	P26640	7407	VARS1	-0.753233	-0.379915	-0.74802	0.511497	0.526363	0.277533	-0.620114	-0.80939	-2.06137	1.44041	1.6852	0.49303	-1.38398	-0.776029	-0.927819	1.93358	1.16008	0.972254	-0.281765	-0.627841	-0.638103	0.201295	0.326319	0.480006	-1.22219	-0.901471	-0.708388	0.260701	-0.383891	0.0927345	-0.12707	-1.27692	-0.798278	0.433801	0.714149	0.199106	-0.839875	-1.15269	-0.304347	0.373192	1.19674	2.05267	-0.844198	-1.21753	0.0320389	1.03525
ENSG00000254772	P26641	1937	EEF1G	0.62417	1.46413	1.979	0.453239	-0.00703198	1.63854	0.62344	-0.264009	0.763624	0.3516	-0.404616	-0.431832	-0.0402215	-1.29471	-0.363606	1.15296	0.256405	-0.237849	-0.440457	-1.05973	-0.618156	-0.41733	-1.68736	-2.0402	1.08838	1.88843	1.65469	-1.36127	-1.26425	-0.870051	1.29999	0.885008	1.23181	0.593609	0.71082	0.296815	-0.272018	-0.237059	-0.563754	-0.145692	-0.911636	-0.0358001	0.172957	-0.290212	-0.306802	-1.38082
ENSG00000122756	P26992	1271	CNTFR	0.228873	-0.614061	1.12952	-1.33198	-1.14662	-1.09061	1.29682	1.22333	1.00313	-1.24035	-1.17085	-1.2664	0.326366	1.23331	0.830938	-0.622739	-0.798531	0.103527	1.14981	1.07719	1.23872	-0.338134	-0.819929	-0.401325	0.592074	1.42103	1.27804	-0.876896	-0.836036	-1.29093	1.59733	1.869	1.76443	0.103228	-0.663678	-0.740142	0.221454	1.05111	-0.363007	-0.406777	-0.653958	-0.459841	-0.22707	0.188219	-0.959194	-1.32379
ENSG00000121989	P27037	92	ACVR2A	0.458382	1.3321	1.03032	1.4791	2.61745	1.21062	0.362599	-0.698291	0.124688	0.369215	-0.740995	0.153334	-1.40049	-0.41117	-0.516221	-0.0856721	-1.34092	0.0150055	-0.160361	-1.07662	-0.424615	-0.305046	-1.47596	-0.516447	0.926013	0.177638	0.713258	1.57199	2.41058	1.22628	-0.761368	-0.423358	0.341708	-1.32684	-0.789256	-0.582461	-0.643521	-1.5168	-1.36777	0.10725	-0.00331709	-0.305507	-0.418249	1.6699	-0.516083	0.172354
ENSG00000148175	P27105	2040	STOM	-1.05817	0.158428	-0.340802	-0.264492	-1.84287	-1.59242	0.380024	0.120844	0.472111	-0.272608	-0.632593	-0.486859	-0.181576	0.748595	-0.292847	1.24124	0.761325	1.94159	-0.37483	-1.26363	-1.00595	1.73184	0.697199	1.35645	-0.889336	-1.20455	0.287991	-0.823888	-1.85771	-1.3445	0.873875	1.31112	0.504952	0.210998	-0.213815	-0.633151	1.60414	1.74781	1.32381	0.606323	0.657593	0.439216	-1.2123	-1.17385	0.389417	-0.2947
ENSG00000162433	P27144	205	AK4	0.0963028	0.0709629	-2.25284	-0.19299	-0.449758	-1.40869	-0.230247	-0.152618	1.04913	-1.0819	-1.04817	-0.419295	0.652194	1.74091	1.33962	-0.752057	-0.29062	-0.637621	0.556675	0.595643	1.69874	-0.669458	0.60705	1.17902	1.31774	1.44562	1.20543	-1.21116	-0.129181	0.0189317	0.12799	0.406572	0.804034	-1.98195	-2.31456	-1.51133	0.579045	0.996617	0.545317	-0.69242	-0.214525	-0.785367	0.476721	0.648048	0.429137	0.229467
ENSG00000134308	P27348	10971	YWHAQ	-1.47128	-0.751856	-1.46837	0.719864	1.84284	1.23422	-0.994578	-1.27467	-1.44689	1.196	0.880862	-0.030714	-0.589692	-0.548408	-0.863131	0.872778	0.694685	0.144734	0.190608	-0.254791	-0.481983	1.54361	0.327804	0.528357	-0.709064	-1.5883	-0.947331	1.58418	1.77771	1.46	-0.630327	0.0692249	-0.734922	0.88866	0.897856	1.37484	-0.985663	-0.210174	-1.56885	-0.0162175	0.585266	-0.0389553	-0.0108881	-0.113837	-1.66171	0.425458
ENSG00000075413	P27448	4140	MARK3	-1.35327	-0.959229	-2.16167	0.999189	0.670052	1.96584	-0.863679	-1.68418	0.544215	0.653381	0.145123	1.155	-0.626868	-0.40689	-0.394906	0.562311	-0.512308	-0.0956608	-0.431894	-0.204499	0.00714719	0.839033	0.91996	1.2338	-1.44566	-1.85904	-1.80581	0.65157	0.540957	0.617486	-1.0333	-1.00928	-0.881803	-0.0638091	0.18841	0.213898	0.054005	-0.557205	-0.490249	0.979139	1.09769	1.4414	-0.676819	0.129418	0.121812	1.14221
ENSG00000143437	P27540	405	ARNT	2.07392	1.23924	1.56861	-0.901556	-0.102632	-0.290113	-0.374824	1.08917	0.728635	-1.08408	-1.13415	-1.18463	0.510641	0.237672	0.263164	-1.47181	0.406791	-1.21423	0.487415	0.904268	0.726023	-0.684055	-0.564005	-1.22945	0.170915	0.56985	0.234612	-0.319654	1.13117	1.32052	-1.26228	-0.719771	-0.604232	-2.24794	-1.26472	-1.27695	1.39465	-0.186662	1.20417	-0.798461	-0.198241	-0.693841	0.871397	1.50097	0.80833	0.135139
ENSG00000223802	P27544	10715	CERS1	-0.61508	-0.63212	-1.73581	2.07284	1.75455	0.954055	-0.225561	-0.573935	-1.58748	1.06472	0.83904	1.3046	0.0291798	-0.414256	-0.769652	0.760977	-0.0698807	0.553796	-0.287239	-0.274022	-1.19474	0.464501	-0.605573	-0.812907	-0.437667	-1.21119	-0.450757	1.37392	1.36956	1.47672	0.254485	-0.0677659	0.785011	1.95714	0.637754	1.63766	-1.00887	-0.0301199	-0.667728	-0.27837	-0.615554	0.103363	-0.609808	0.158149	-0.52371	-1.44779
ENSG00000132383	P27694	6117	RPA1	1.33819	0.333335	0.823239	-1.07391	-1.26007	-1.14238	1.09022	1.07744	1.05234	-0.995807	-1.2396	-0.907007	0.880053	1.25562	0.965574	-0.889865	-1.0393	-0.887783	0.816255	0.883141	0.918302	-0.683284	-0.691804	-0.622885	1.06216	1.00977	1.0249	-0.353962	-1.11601	-0.695068	1.11541	0.939304	1.20868	-0.861196	-1.26964	-0.557513	0.75815	0.804321	0.650583	-1.4256	-1.45555	-1.00525	1.22385	1.27852	-0.104329	-0.710117
ENSG00000100823	P27695	328	APEX1	-1.83879	-1.47336	-0.83384	-0.0704647	0.613635	-0.0746134	-0.233982	-0.498948	-1.43812	1.53639	0.397266	-0.252857	-1.06527	-0.463938	-0.475711	1.24112	1.43942	1.12987	-0.616539	-0.349874	-0.0961001	0.722591	0.989339	1.71278	0.550563	0.172003	0.753397	-1.08099	-1.88969	-2.01302	0.510042	-0.39609	0.693644	-0.337626	-1.27378	-0.633408	0.0347924	-0.093489	1.27377	-0.43073	0.302801	0.174913	0.69417	0.533482	2.70841	-0.270043
ENSG00000156136	P27707	1633	DCK	0.864081	1.33995	1.43414	-1.33038	-0.0243777	-0.841973	1.62361	1.41252	-0.0905248	-0.0526488	-0.492347	-0.178141	0.747706	1.45303	0.510978	0.376162	-0.395502	-0.852962	-0.0246778	-0.296803	-0.914602	-1.32995	-1.32614	-1.61114	-0.71421	-0.635914	-0.824523	1.3415	1.52567	1.44179	-1.12846	0.401774	-1.64765	1.12286	1.09289	1.20064	-0.158489	0.559454	-0.3676	-0.194128	0.888172	0.289411	-1.74378	-0.484439	-1.55027	-0.0654853
ENSG00000084774	P27708	790	CAD	1.27448	1.34042	1.65775	-0.921883	-1.3312	-0.467263	0.841557	1.33921	1.13418	-0.894853	-0.701248	-0.801816	0.554155	0.359729	0.757588	-1.18056	-0.907833	-1.22091	0.37262	0.440158	0.932537	-1.15139	-0.759081	-0.666351	1.56067	0.912499	2.35978	-0.861154	-0.682549	-1.65874	0.680855	-0.059355	1.09844	-0.743609	-1.87013	-0.511982	0.319838	-0.196079	0.960939	0.199967	-0.809092	0.229198	0.0520993	-0.621119	0.439712	-1.30212
ENSG00000047849	P27816	4134	MAP4	0.0463775	0.825047	0.848219	-0.426819	-0.710905	-0.399362	1.30437	1.33904	0.50879	-1.25854	-1.65057	-2.08651	1.04674	0.57695	0.303027	-1.47107	-1.23259	-1.02934	0.55204	0.601278	0.460948	0.793124	0.568578	0.491176	-1.44706	-1.53703	-0.39496	1.22967	1.70283	1.65226	-1.35992	-0.866264	-1.29832	0.581025	0.492552	0.525804	-0.0566619	-0.792508	0.234568	0.466689	0.548562	0.290094	-1.4526	-0.832725	0.0152295	0.730793
ENSG00000213366	P28161	2946	GSTM2	0.896894	1.5547	0.733569	-1.78782	-2.12143	-1.6413	0.755136	1.20574	0.663044	-0.287327	0.670825	0.381136	0.783433	0.5986	0.443345	-0.311397	-0.857305	-0.954774	-0.00799925	0.402611	0.944032	-1.15163	-0.471731	-0.440345	0.546258	0.827076	1.05007	-0.726621	-1.98728	-0.935098	0.763177	0.519912	0.66734	0.682287	0.669781	0.996695	1.08772	1.32432	0.765501	-0.833712	-0.990475	-1.03493	0.337061	0.237716	0.0831408	-0.816134
ENSG00000117528	P28288	5825	ABCD3	0.429934	0.668114	1.60909	-0.830719	-1.70617	-0.456215	0.978453	1.60753	0.807717	-0.855332	-1.01589	-0.58402	0.955568	1.04962	0.805222	-0.763445	-0.9138	-0.400078	1.00498	0.347649	0.594544	-0.748258	-1.44484	-1.13966	0.0956354	-0.723745	-0.147937	-0.87778	-1.43543	-1.10633	1.13361	1.88264	1.00866	-1.01456	-0.641614	-0.482295	1.47349	2.04525	0.803538	-0.873256	-0.548102	-0.903105	0.695609	0.897572	0.0558277	-0.185716
ENSG00000023228	P28331	4719	NDUFS1	-0.86655	0.219493	-0.37542	0.661545	0.0456397	-0.26249	-0.15714	0.627653	-0.849849	1.96328	1.93786	0.888798	-0.764827	-1.52403	-0.667788	1.4492	0.893789	1.00453	-1.15631	-1.35283	-1.08559	0.196808	-0.304151	-0.521613	1.80682	-0.389612	0.736187	0.439269	0.0452327	-0.237412	0.523393	0.37039	-0.283446	0.473463	-1.45622	-0.843434	0.568772	0.013486	1.93501	-1.7332	-1.26508	-1.58699	0.606545	1.0892	0.793518	-0.0860577
ENSG00000062822	P28340	5424	POLD1	1.38318	1.10966	1.57563	-0.912429	-1.12691	-0.832874	1.03902	1.35026	0.818437	-1.01881	-0.90652	-0.887615	0.667254	0.721878	0.758922	-0.904667	-0.857495	-0.828688	0.768882	0.597996	0.608137	-1.0231	-1.01082	-1.08934	1.57225	1.2234	1.50358	-1.42658	-1.17918	-1.0762	1.33186	1.01809	0.90807	-0.893815	-0.862896	-1.29507	0.27114	1.23508	0.139837	-0.893815	-0.615163	-0.62965	0.545704	0.680408	-0.649547	-0.786652
ENSG00000187079	P28347	7003	TEAD1	0.114797	0.30267	0.728047	-0.674981	-0.750926	-1.40327	0.78658	0.29144	0.593827	-0.699531	-0.946171	-1.60209	0.618272	1.0819	1.02697	-1.0643	-0.656047	-1.38488	1.53449	1.6577	1.61923	-0.481024	-0.140671	-0.55204	0.644947	0.815514	1.1604	-0.314985	-0.236557	-0.628538	0.558001	0.447431	0.620258	-1.31644	-1.77825	-1.16575	1.112	0.7383	0.696459	-1.02124	-1.18946	-0.930074	1.57629	1.61927	0.683978	-0.690773
ENSG00000102038	P28370	6594	SMARCA1	1.93027	0.683921	0.462641	-0.162936	0.104285	0.198678	1.20856	1.20995	1.7653	-1.50286	-1.30451	-1.36361	0.804386	0.529709	0.734209	-0.994703	-1.39591	-0.872109	-0.383305	0.0891513	0.16192	-0.892135	-0.533172	-0.47773	0.824041	1.46029	1.63812	0.446488	0.799263	0.68697	0.765548	0.67177	0.923689	-0.967963	-0.856371	-0.227654	0.855972	1.21358	0.689038	-1.12253	-1.26432	-0.695734	-0.612484	-0.338605	-1.35262	-1.37051
ENSG00000100030	P28482	5594	MAPK1	-0.925246	0.351708	0.226481	-1.68947	-0.294354	-0.42588	0.468033	1.47818	0.519144	-0.821674	-0.681117	-1.1124	0.894485	1.45262	1.08316	-0.972573	-0.713822	-1.17313	1.25756	1.14008	1.70524	-0.404276	-0.667576	-0.695178	-0.3613	-0.297906	1.14941	1.99481	0.885131	0.602838	-0.658006	1.42872	-0.0730485	-0.110626	-1.47929	-0.899998	1.80836	0.251574	0.608821	-0.123549	-2.25674	-0.346676	0.329175	-0.124545	-0.20892	-0.38332
ENSG00000115271	P28676	25801	GCA	-0.121327	-0.438655	-0.394154	-1.35853	-1.38194	-1.05087	0.837369	1.44505	1.25035	-0.608565	-0.637362	-0.602792	1.13494	1.21636	1.05448	-0.980195	-0.680887	-0.840731	1.46242	1.21083	1.24469	-0.347068	-0.683754	-0.729652	-0.0674206	-0.16943	-0.085901	-0.371735	-1.80399	-1.41998	1.12192	1.43618	0.456872	0.396007	0.142567	0.454453	0.990584	1.8162	0.465317	-1.3539	-0.457921	-1.3677	1.088	1.4068	-0.280897	-0.629214
ENSG00000002549	P28838	51056	LAP3	0.91251	1.10807	1.11733	-1.33154	-1.43054	-1.74179	0.704785	0.776909	-0.158432	-0.669154	-0.687182	-0.838249	1.50367	0.152722	0.953828	-0.795705	-0.479866	-0.530198	0.790952	0.832025	1.60671	0.0958638	-0.786116	-1.10661	-0.150011	-0.839928	-0.0464546	-1.09607	-1.81979	-1.51445	0.527417	0.779485	0.283712	-0.100996	-0.227626	0.846079	1.4651	0.859783	0.822313	0.0193659	-1.45526	-0.551462	2.35396	-0.128504	0.906825	0.197225
ENSG00000134900	P29144	7174	TPP2	0.537773	0.892263	0.525638	0.689661	0.14679	0.233162	-0.896126	-1.20514	-1.80512	1.31536	1.42741	-0.664739	0.0143702	-0.481569	-0.548254	-0.754754	-0.908822	-0.48535	2.1982	1.21926	0.947578	-0.588947	-0.888155	-0.920479	-1.25165	-0.915098	-0.924086	-1.00897	-0.390537	-0.658738	-0.686839	-1.14019	-0.563473	-0.229222	-0.0542072	0.116131	2.45858	0.125674	1.7374	0.24658	-0.00340458	0.310817	0.883612	1.58829	1.34805	-0.181012
ENSG00000044524	P29320	2042	EPHA3	0.687079	-0.275107	0.329805	-0.481602	-0.458168	-1.47116	-0.321487	0.203074	-0.975138	-0.677382	-1.61206	-1.57688	0.306204	0.0185449	0.237515	0.471765	1.31759	1.12838	-0.0912574	-0.641653	-0.85186	2.2141	1.75629	0.763411	0.0115813	-0.0758372	-0.288827	-0.361163	0.178504	-0.254698	-0.0210505	0.0512157	-0.229534	-2.50104	-2.09235	-2.15852	0.296587	0.19384	0.266516	1.01487	1.03061	0.903719	-0.0315642	0.148066	0.46542	1.14186
ENSG00000133216	P29323	2048	EPHB2	0.644485	-0.173104	-0.128838	-0.885835	-0.175374	0.109718	0.463155	-0.298849	-0.222838	-1.15875	-1.59301	-0.752657	2.04419	0.115192	1.28644	-1.2337	-1.0018	-0.0237415	0.818893	1.48657	2.13313	-0.910265	-0.526803	-0.0162149	0.431743	0.469603	0.992115	-0.0748693	0.870075	0.260052	1.02162	0.764067	1.0325	-1.44944	-1.34806	-1.29193	0.00879959	0.0628656	-0.382415	-0.294203	-1.30121	-0.872875	2.49044	1.31327	-0.562247	-0.825838
ENSG00000143320	P29373	1382	CRABP2	1.17476	2.40047	1.34515	1.10643	0.248351	-0.0466803	-0.500225	0.0122754	-0.275982	-1.13042	-0.821995	-0.98469	-0.115698	-0.432887	-0.0656702	-1.48311	-0.81784	0.923202	-1.43954	-0.623848	-0.395565	0.0619153	0.146538	1.71506	1.68075	1.54011	1.77041	0.368004	0.550516	1.34682	0.0707727	-0.531491	0.180404	-0.680347	-0.55181	-0.501001	-0.911499	-0.437675	-1.15948	-0.717734	-0.100604	-0.391453	0.192269	-1.36859	-0.98242	2.03532
ENSG00000163931	P29401	7086	TKT	-1.10602	-1.38025	-1.03645	0.51404	1.14901	0.620474	0.0113019	-0.400436	-0.960393	1.29659	1.36967	0.35577	-0.731339	-0.238155	-0.497821	1.77307	1.0241	0.976932	-0.673672	-1.90308	-1.13433	0.162453	-0.0197319	0.828252	0.875369	0.939183	1.26528	0.290168	-0.684896	0.43982	0.963117	0.43982	0.863427	1.17497	1.00592	1.38252	-0.22712	0.0668345	0.245268	-0.86365	-0.225233	-0.749106	-1.07992	-0.808456	-0.16167	-2.13182
ENSG00000104529	P29692	1936	EEF1D	0.998827	1.64102	1.70672	-0.720433	-1.03992	-1.35948	1.18175	1.03736	-0.585623	-0.955512	-0.318026	-1.11465	0.84581	0.572634	0.559306	-0.595687	-0.242435	-0.395833	1.44571	0.299331	0.321388	-1.2777	-0.891383	-1.11319	0.945573	1.29944	1.22022	-1.25034	-1.36594	-1.18026	0.990382	0.730888	0.746995	-1.27296	-1.12934	-1.13298	0.797471	0.886315	1.15157	-0.582529	-0.691917	-0.507712	0.585039	0.683734	1.18834	-1.11191
ENSG00000277443	P29966	4082	MARCKS	0.556586	0.970026	1.24577	-0.414727	-0.0811017	-0.752337	1.08075	1.10353	-0.134909	-0.915409	-1.50479	-2.02957	1.20578	0.094838	0.550804	-1.06027	-0.700657	-1.01284	1.35364	1.00198	1.03526	0.131822	-0.926015	-0.798156	-0.0243393	-0.297157	-0.61146	-0.548049	0.595039	0.00185797	1.22093	1.35674	0.992923	-1.73452	-1.70146	-1.31093	0.820901	1.0266	0.647075	-1.0579	-0.501836	-0.842662	1.35202	1.64804	0.519518	-0.3701
ENSG00000159423	P30038	8659	ALDH4A1	-0.520102	-0.267149	0.652353	0.224708	-0.0843477	0.90884	1.64965	0.528441	1.83785	1.13494	0.202506	0.986036	-0.166116	-0.699682	0.18541	-0.38575	-1.56312	-0.487665	-0.860044	0.70544	0.320427	-2.43384	-0.561545	-1.30724	1.44944	1.15993	0.889738	0.952415	-1.30961	-0.746524	0.848854	0.503464	1.02818	0.977088	0.274948	0.974631	0.962311	0.117948	-0.31149	-1.20366	-1.11752	-1.07545	-0.407777	0.459269	-0.222303	-1.75329
ENSG00000108187	P30039	64081	PBLD	-0.779217	0.972161	-0.790021	-0.709637	-0.966133	-1.12194	-0.620989	0.174809	-0.320264	-1.48112	0.566546	-1.88439	0.995322	0.742082	0.826968	-1.09832	0.75977	-0.672811	0.984627	0.304065	2.11018	0.828631	0.285894	0.893789	-0.594446	-1.08369	-0.849877	0.296021	0.942046	-0.253333	-1.06936	-0.0499034	-0.310272	-1.49686	-2.08009	-1.08369	1.13201	0.688461	0.732821	-0.106003	-0.819308	0.0932057	1.89316	0.828865	0.998015	1.49267
ENSG00000117592	P30041	9588	PRDX6	1.66833	1.84445	1.48019	-1.43304	-0.296576	-1.0634	0.701753	0.952341	-0.00857426	-1.25683	-0.953356	-1.76258	0.895455	0.191203	0.606995	-1.00006	-0.600347	-0.97931	-0.336944	-0.0208322	0.152259	0.660188	0.504218	0.0544758	1.40368	1.52508	1.67812	-0.906773	-1.34877	-1.36269	1.03462	1.17504	1.39037	-1.38951	-0.970894	-0.47745	0.182714	0.835938	-0.219567	-1.16183	-0.354289	-1.04197	0.326902	0.136886	0.165365	0.00753173
ENSG00000126432	P30044	25824	PRDX5	-1.26597	-0.911182	-1.5491	-0.147686	0.442682	0.84759	-0.812199	-0.586716	-0.68011	0.960138	0.669011	0.662251	-0.978539	-0.807877	-0.62461	1.44134	1.22821	0.96576	-1.00994	-0.977229	-0.688863	1.51228	1.0301	1.28066	-0.925308	-1.4727	-1.02595	1.81578	0.387272	1.27315	-0.384668	-0.870355	-0.644662	1.43583	1.09186	0.872846	-1.34219	-0.419099	0.0630151	0.723934	-0.0104353	0.982932	-1.07848	-1.6305	-0.513587	0.418263
ENSG00000165672	P30048	10935	PRDX3	-1.1137	0.438889	-0.377152	-1.43721	-1.23958	-0.967906	-0.0877836	-0.421935	-0.531222	0.737342	0.67587	0.403088	-0.0651994	-1.55931	-0.530531	1.56178	1.16335	1.1527	-0.594911	-0.78029	-0.604991	1.81399	1.20703	1.15769	1.27646	0.390942	1.11741	0.134914	-1.10873	-0.637566	0.772349	1.42928	0.988834	-0.309693	0.191263	1.54061	-0.786568	1.2798	-2.06691	-1.15762	-0.528705	-0.554152	0.459749	0.66074	-1.44009	-0.286431
ENSG00000197958	P30050	6136	RPL12	1.56466	2.96602	1.26179	0.33879	-1.09469	-0.158287	0.446265	1.37989	0.290684	-0.0994877	-0.429265	-0.476104	0.22405	-0.33156	-0.41728	-0.282574	0.00457067	-0.752975	-0.128926	-0.765962	-0.405511	-0.153661	-1.46146	-1.51898	1.41976	1.93652	1.6869	-1.08912	-1.74732	-1.30821	1.11406	0.699789	1.15743	-0.612351	-0.797002	-0.160555	0.413238	-0.0194856	0.398385	-0.49076	-0.846905	0.00898029	0.121342	-0.368592	0.715746	-0.618828
ENSG00000162368	P30085	51727	CMPK1	-0.296454	0.4441	-0.70814	-0.991763	1.07412	0.12946	-0.978452	-0.52519	-1.28501	-1.60053	-1.44927	-1.61181	0.324881	-0.0247353	0.257625	-0.20335	-0.0220086	0.0623525	1.05647	0.976409	0.934193	1.80835	1.19374	1.43501	-1.62212	-2.30273	-1.37864	1.07691	0.991323	0.6978	-0.856835	-0.29674	-1.20293	0.666124	0.944418	0.902946	-0.764806	-0.802984	-0.487487	0.353269	0.28838	0.769283	0.437972	0.505236	-0.730306	0.74771
ENSG00000089220	P30086	5037	PEBP1	-0.881442	-0.95671	-0.860812	-0.831037	0.235068	0.0146245	-0.650648	-1.01404	-1.15428	0.536472	0.429227	0.109102	-0.476385	-1.04237	-0.453963	1.68302	1.06193	0.716178	-0.776621	-0.688656	-0.232292	2.06951	1.31749	1.84664	-0.269531	-1.23661	-0.574265	1.23254	0.151354	1.00549	-0.228716	-0.460759	-0.504482	1.21619	1.22676	1.37303	-1.88452	-0.518509	-1.59	0.50753	0.921351	0.723561	-0.689228	-1.11623	-1.39238	0.754917
ENSG00000166483	P30291	7465	WEE1	0.456502	0.830141	0.529703	-0.921965	-1.55682	-0.382815	1.23913	0.937072	0.916017	-0.0703184	-1.43617	-0.79705	0.794115	1.00467	0.756833	-0.686032	-1.25317	-1.16944	1.07412	1.1996	1.16687	-1.33774	-0.996312	-0.296945	0.906744	0.953934	1.02038	-1.64165	-1.3502	-0.762039	0.918838	0.890623	0.802926	-1.63443	-1.22824	-1.22824	0.724453	1.24488	0.653489	-0.761477	-0.41964	-0.858486	1.08889	1.12769	0.509392	-0.356936
ENSG00000108179	P30405	10105	PPIF	-0.492463	0.317668	0.609227	-0.550952	-1.6145	-0.396966	2.14776	1.54877	1.42671	1.69021	0.153342	0.383872	-0.363185	-0.562642	0.578361	0.336702	-0.341085	-0.164815	-0.304962	-0.77303	-0.0794197	-1.96665	-1.16992	-0.41204	1.50268	1.71455	1.90394	-0.571788	-1.07581	-0.344255	0.701804	1.21922	1.07088	-1.59008	-0.944333	-0.310102	-0.871415	1.02735	-0.869997	-0.301288	-0.414595	-0.264945	0.105922	-0.254968	-1.58513	-0.0728872
ENSG00000114857	P30414	4820	NKTR	1.92416	1.50661	0.910495	-0.904049	0.14934	-1.49303	0.641436	0.82056	-0.298058	-1.05779	-0.857356	-1.45129	0.691784	1.44323	0.198684	-1.1589	-0.63866	-0.862772	0.458955	1.20233	-0.0504865	0.0857662	-0.162131	-1.09884	-0.209768	-0.677893	-0.852732	0.0284579	1.17752	0.11874	-1.84177	-1.49499	-0.835484	-0.931201	-1.56584	-0.95682	1.20086	0.0371343	0.575424	1.15268	0.74093	0.225237	-0.729715	0.915525	0.934389	0.413377
ENSG00000103415	P30519	3163	HMOX2	-1.87693	-0.582248	-1.69504	0.688779	-0.038023	1.26251	-0.900303	0.0887486	0.0798922	1.21046	0.976467	1.28655	-1.2488	-0.980876	-0.519965	1.08918	1.09196	0.83921	-1.11471	-0.796301	-0.323462	-0.0793619	0.421391	1.12086	-1.91055	-1.07534	-0.706802	1.05146	1.30226	1.18412	-0.939466	0.0324702	-0.420051	1.39828	0.515443	0.992274	-1.81277	-0.862555	-1.33629	0.835148	0.915244	0.271808	-0.608172	-0.294741	-0.291966	0.220507
ENSG00000035687	P30520	159	ADSS2	1.96351	2.04303	1.0446	-0.819336	-0.144726	-0.38004	0.673805	1.15664	0.20846	-1.82877	-1.09752	-0.996049	0.732644	0.213029	1.073	-1.20158	-0.790341	-0.646021	-0.02943	-0.364509	0.660453	-0.339436	-0.812669	-0.318745	-1.2748	-1.28339	-1.45097	0.431876	0.500276	0.758224	-0.937215	-0.615752	-0.710224	1.11001	1.00399	0.741455	-0.874994	-0.848104	-0.107262	1.41701	0.844042	1.04895	-1.2029	-1.00213	-0.80508	0.865089
ENSG00000100300	P30536	706	TSPO	-0.735004	-0.964011	-0.405307	-1.08187	-2.42788	-1.77525	0.214713	0.420666	-0.510534	0.217888	0.667427	0.087977	0.150901	-0.282432	-0.513551	1.32911	1.23405	1.23207	0.0907918	-0.159384	-0.533154	1.27171	1.27608	1.195	-1.48337	-0.50236	-0.286528	-1.73454	-2.85573	-1.80024	0.186546	0.777062	0.159727	0.442353	0.60606	-0.0330197	0.625846	0.244319	0.264361	0.701003	1.15323	0.523231	-0.223564	0.456614	0.609514	0.762119
ENSG00000239900	P30566	158	ADSL	1.25475	1.51356	1.92518	-0.398724	0.00347424	-0.376338	1.145	0.238306	0.00698968	-0.989463	-1.34474	-1.33374	0.731098	0.581471	0.714534	-1.27604	-1.64681	-0.585204	0.527179	1.03522	0.347402	-0.684195	-0.359153	-1.02976	1.13393	0.66361	1.11926	-0.61338	0.145864	-0.797749	0.911372	0.266517	0.981004	-1.67721	-1.97446	-1.90379	1.05179	0.614398	0.881538	-0.526939	-0.791749	-0.65059	0.706177	0.685491	1.11696	0.0198063
ENSG00000130779	P30622	6249	CLIP1	-0.841208	-0.72746	-2.42266	0.450864	-0.501408	0.613383	-0.328997	-0.153622	-0.699573	2.04728	2.4582	0.708148	-0.459981	-0.0879488	-0.0226062	0.623838	0.469149	0.536644	-0.602282	-0.754333	-0.649354	0.945096	-0.584978	-0.0161906	-1.22147	-1.92243	-2.05586	0.490179	0.648792	0.679868	-1.25702	-1.14772	-1.26233	0.0618236	0.127144	0.200387	1.00648	-0.145476	1.48308	0.768767	0.540167	0.633841	-0.626159	0.0781897	1.4679	0.181431
ENSG00000075142	P30626	6717	SRI	0.388099	0.430268	0.357282	-0.92564	-1.33267	-0.861956	0.575937	0.932816	0.579649	-1.08851	-0.940208	-1.12766	1.1305	0.262267	0.4	-1.05456	-0.799907	-0.757443	1.60086	1.81878	1.91096	-0.156814	-0.636782	-0.705287	0.448831	0.56362	0.570686	-0.415451	-0.948861	-1.43614	0.943599	0.734205	0.966937	-0.836989	-1.16063	-0.617881	0.288726	0.966856	0.508591	-1.18834	-1.16127	-0.881086	2.02343	2.03292	0.299151	-0.317683
ENSG00000137124	P30837	219	ALDH1B1	1.10141	0.455555	1.28274	0.0388042	-0.24457	-0.216682	-0.0206523	0.44576	0.719344	0.0979823	0.835841	0.964513	-1.02945	-2.10558	-1.12804	0.863383	-0.0288728	0.0917869	-2.07009	-0.596507	-1.83308	0.7801	0.980142	0.616162	1.18103	1.60584	1.89966	-1.17398	-1.81489	-0.768818	1.19455	0.733442	1.22307	-0.508934	-1.37704	-1.08433	-0.416513	0.465573	-0.462377	-0.683865	0.876924	0.124792	-0.781605	-0.126201	-0.759262	0.0839526
ENSG00000180616	P30874	6752	SSTR2	-2.80198	-1.23747	-1.98625	-0.427598	-0.581638	0.405407	0.546534	-0.0225504	-0.381956	0.956283	1.2874	0.329475	-0.16141	1.00024	0.433803	-0.0781764	-0.0697307	0.459944	0.959643	-0.559179	-0.023984	-0.477647	1.27565	1.1552	-1.6896	-1.8673	-2.15962	-0.27011	-1.23814	-0.15534	0.121344	0.380722	-0.201968	0.0340845	0.193628	-0.255509	1.24111	0.934808	1.37854	-0.550859	0.187395	-0.442349	-0.199165	0.233142	1.58042	0.883587
ENSG00000047315	P30876	5431	POLR2B	1.99007	0.199955	1.56801	-1.30689	0.33415	-0.886783	-0.125885	0.199516	-0.028245	-1.78566	-1.2961	-1.71281	0.485882	0.118737	0.559073	-0.992285	-0.298065	-0.326712	0.802135	1.70814	0.508935	0.439029	0.315694	-0.469885	-0.976489	-1.60893	-2.51755	1.22937	1.10448	-0.0803965	-0.205805	-0.99406	-0.516096	-0.0780656	0.408286	0.512308	-0.169248	-1.38766	0.913601	1.19075	1.10365	1.11505	-0.499041	0.0651913	-0.606002	0.609618
ENSG00000102879	P31146	11151	CORO1A	-1.47256	-0.807924	-0.999602	0.954532	0.970525	1.07436	-0.905787	-0.865499	-1.12332	1.38725	1.45741	0.822346	-0.987982	-1.15574	-0.736517	1.31815	1.0823	0.917101	-0.585545	-0.348282	-1.06896	0.474891	0.287772	0.311074	-1.10441	-0.961209	-1.68104	0.79928	0.463707	0.56317	-0.0812382	-0.398719	-0.109182	1.22727	1.01186	1.20394	-0.904117	-0.212952	-0.723185	0.756899	1.34452	0.416405	-0.516272	-0.0912702	-2.69219	0.456823
ENSG00000203879	P31150	2664	GDI1	-1.53457	-1.62387	-1.86357	0.571498	0.823455	0.872105	-1.06274	-1.2748	-0.909341	0.792567	0.761423	0.605294	-0.680365	-0.422372	-0.554657	0.795794	0.747826	0.734571	-0.0950545	-0.0959396	-0.342669	1.46473	1.026	1.26468	-1.5562	-1.86462	-2.65027	0.968008	0.619779	0.82727	-0.739591	-0.990024	-1.03997	1.07947	0.837405	0.983744	-0.0337803	-0.0559006	0.053677	0.790117	0.4444	0.530522	-0.451511	0.538811	0.104595	0.496528
ENSG00000168906	P31153	4144	MAT2A	0.185183	0.296089	0.297526	-0.75856	-0.890965	-0.222432	1.68014	1.07557	1.30961	-0.894176	-1.33082	-0.331436	0.647416	1.23724	0.990465	-1.50819	-1.07479	-0.726354	0.914845	0.88352	1.09943	-1.46977	-0.957021	-0.452524	0.697909	-0.660348	0.658645	-0.796415	-0.419097	-0.688864	0.824408	0.889319	0.755612	-2.07936	-1.64725	-0.814127	1.68922	1.18123	1.30579	-0.397137	-0.481003	-1.01388	1.02982	0.732459	0.770066	-0.211409
ENSG00000188191	P31321	5575	PRKAR1B	-0.536082	-2.91353	-0.510432	0.765641	0.73771	0.926416	0.283615	-2.82362	0.63186	0.425104	-0.408513	0.645959	-0.165068	0.357049	0.42715	0.530415	-0.746609	0.106657	0.378062	0.742144	0.446607	-0.346137	0.45052	0.595079	-1.48166	-1.29342	-1.36199	1.4747	0.4701	0.869276	-0.604967	0.097203	-0.782984	0.994841	1.42964	0.61785	-0.843414	-0.602221	-0.878721	1.59392	0.625342	0.692395	-1.18065	-0.341909	-1.3317	0.423932
ENSG00000005249	P31323	5577	PRKAR2B	-0.873512	-0.987831	-1.28293	1.22913	2.08026	1.55641	-0.911681	-0.98341	-0.933571	0.889336	1.14829	0.914533	-0.853723	-0.580245	-0.721234	1.17167	0.344063	0.665794	-0.821778	-0.662905	-0.985661	0.152238	0.154597	0.292154	-0.846452	-1.10938	-0.837249	1.46067	1.49378	1.32155	-0.895477	-0.635912	-0.952768	1.31524	1.61401	1.33847	-0.702026	-0.86301	-0.853294	0.546692	0.435254	0.466823	-1.26071	-1.0116	-0.732033	0.226979
ENSG00000171848	P31350	6241	RRM2	0.728657	1.1956	1.24165	-0.732659	-1.44848	-1.17559	0.938923	1.00205	0.36118	-0.762313	-0.942453	-0.859336	1.10944	0.393456	0.986985	-0.989505	-0.554511	-0.449247	1.61921	0.726387	0.846143	-0.917291	-1.07324	-1.24505	1.02729	1.1147	0.958796	-0.982181	-1.28363	-1.04877	1.04944	1.05897	1.01868	-0.708055	-0.984276	-0.567627	0.796465	1.20606	0.264443	-1.1355	-0.348316	-1.06798	1.14725	1.20108	0.239639	-0.371228
ENSG00000116001	P31483	7072	TIA1	0.341103	-0.423029	1.00429	-0.117984	1.02906	1.35674	0.386519	0.0839583	1.40987	-0.692144	-0.43468	-0.208298	-0.407889	-0.939936	0.819956	-1.62171	-1.89077	-0.574073	0.802014	1.11357	1.63206	-1.5962	-0.52184	-0.550576	-0.735281	-1.03183	-0.838793	0.0944552	2.15189	0.694694	-1.41032	-1.32121	-1.38308	-1.13047	-0.323979	-1.10639	0.562947	-0.18481	0.759946	0.842573	-0.0799425	0.73414	-0.628332	0.93573	0.509494	0.428422
ENSG00000010818	P31629	3097	HIVEP2	-0.777016	-0.216317	-0.984865	-0.424319	-0.633167	-0.743476	-0.94066	-0.3468	-1.02541	1.26941	1.71398	0.483527	-0.669539	-0.492536	-0.644912	2.30822	1.53349	1.57585	-0.618573	-0.590321	-0.905031	0.700966	0.257407	0.170095	-1.32862	-1.2735	-1.33063	0.129978	0.000827943	-0.22503	-1.30668	-1.19142	-1.61609	0.64244	1.22076	0.534142	-0.192345	0.634227	-0.351634	1.59241	1.44248	1.17471	-0.874552	-0.285876	-0.0944131	0.840438
ENSG00000105221	P31751	208	AKT2	0.303778	0.696421	-0.063859	-1.36664	-1.00686	-0.220265	-0.218635	0.177572	0.690583	-0.931945	-0.74617	-0.764404	0.893748	0.433729	1.19992	-1.68428	-1.12207	-0.743932	1.36552	1.66061	2.19876	-0.35231	-0.504704	0.105436	-0.845511	-0.904677	-0.470347	-0.47483	-0.168586	-1.65497	-1.68153	0.19702	0.103631	-0.963271	-0.721452	-1.24479	0.93109	0.961263	0.776757	0.504489	-0.375394	-0.208466	1.17119	1.62501	1.15297	0.0402922
[truncated: 2,799 more rows]
[truncated: 3 more columns]

## Sheet: Module clustering
UniProt	ENSG_id	gene_id	gene_symbol	module
A0A0U1RRI6	ENSG00000224109	347549	CENPVL3	1
A2PYH4	ENSG00000162669	164045	HFM1	1
A6NHR9	ENSG00000101596	23347	SMCHD1	1
A6NIH7	ENSG00000175970	84747	UNC119B	1
EGFP	EGFP		EGFP	1
O00151	ENSG00000107438	9124	PDLIM1	1
O00186	ENSG00000116266	6814	STXBP3	1
O00203	ENSG00000132842	8546	AP3B1	1
O00291	ENSG00000127946	3092	HIP1	1
O00299	ENSG00000213719	1192	CLIC1	1
[truncated: 6,704 more rows]
