# Supplementary material for: Integrated transcriptome and proteome analysis reveals posttranscriptional regulation of ribosomal genes in human brain organoids
Source: eLife. 2023 Mar 29;12:e85135. doi: 10.7554/eLife.85135 (PMC10059687; doi:10.7554/eLife.85135)
Supplement: Figure 3—source data 2. [file elife-85135-fig3-data2.xlsx]

## Sheet: Summary
This file summarises the results of transcript feature analysis.
Each tab contains the results for the specific feature analyzed.

## Sheet: 3UTR.miRNA
transcript_id	gene_symbol	UniProt	ENSG_id	gene_id	module	num_miRNA_sites	miRNA_score_sum	miRNA_score_min	num_cnsv_sites	cnsv_score_sum	cnsv_score_min	num_noncnsv_sites	noncnsv_score_sum	noncnsv_score_min	miRNA_density	miRNA_score_density	cnsv_site_density	cnsv_score_density	noncnsv_site_density	noncnsv_score_density
ENST00000001008	FKBP4	Q02790	ENSG00000004478	2288	7	60	-12.59	-0.64	51	-12.59	-0.64	0	0	0	0.027675	-0.005807	0.023524	-0.005807	0	0
ENST00000002165	FUCA2	Q9BTY2	ENSG00000001036	2519	1	4	-2.18	-0.72	4	-2.18	-0.72	0	0	0	0.004449	-0.002422	0.004449	-0.002422	0	0
ENST00000003100	CYP51A1	Q16850	ENSG00000001630	1595	4	6	-0.53	-0.11	6	-0.53	-0.11	0	0	0	0.003955	-0.000351	0.003955	-0.000351	0	0
ENST00000005259	BCAP29	Q9UHQ4	ENSG00000075790	55973	7	80	-11.37	-0.54	47	-11.37	-0.54	0	0	0	0.022792	-0.00324	0.01339	-0.00324	0	0
ENST00000005286	TMEM132A	Q24JP5	ENSG00000006118	54972	9	7	-1.72	-0.32	7	-1.72	-0.32	0	0	0	0.027451	-0.006757	0.027451	-0.006757	0	0
ENST00000005340	DVL2	O14641	ENSG00000004975	1856	1	31	-8.77	-0.49	31	-8.77	-0.49	0	0	0	0.058824	-0.016645	0.058824	-0.016645	0	0
ENST00000005374	GGCT	O75223	ENSG00000006625	79017	1	4	-1.55	-0.51	4	-1.55	-0.51	0	0	0	0.007168	-0.002781	0.007168	-0.002781	0	0
ENST00000005386	RPAP3	Q9H6T3	ENSG00000005175	79657	1	36	-4.22	-0.43	19	-4.22	-0.43	0	0	0	0.015936	-0.001869	0.008411	-0.001869	0	0
ENST00000007516	NDUFAB1	O14561	ENSG00000004779	4706	7	7	-2.08	-0.55	5	-2.08	-0.55	0	0	0	0.038251	-0.011393	0.027322	-0.011393	0	0
ENST00000007699	YBX2	Q9Y2T7	ENSG00000006047	51087	9	42	-13.06	-0.46	42	-13.06	-0.46	0	0	0	0.096774	-0.030083	0.096774	-0.030083	0	0
ENST00000011619	RANBP9	Q96S59	ENSG00000010017	10048	5	114	-26.06	-0.58	114	-26.06	-0.58	0	0	0	0.131488	-0.030057	0.131488	-0.030057	0	0
ENST00000013070	UBR7	Q8N806	ENSG00000012963	55148	1	56	-9.12	-0.46	50	-9.12	-0.46	0	0	0	0.025653	-0.004176	0.022904	-0.004176	0	0
ENST00000013125	MAP4K5	Q9Y4K4	ENSG00000012983	11183	9	51	-11.19	-0.71	35	-11.19	-0.71	0	0	0	0.034068	-0.007476	0.02338	-0.007476	0	0
ENST00000014930	HEBP1	Q9NRV9	ENSG00000013583	50865	1	1	-0.68	-0.68	1	-0.68	-0.68	0	0	0	0.002237	-0.001519	0.002237	-0.001519	0	0
ENST00000022615	VDAC3	Q9Y277	ENSG00000078668	7419	9	35	-7.74	-0.53	31	-7.74	-0.53	0	0	0	0.079909	-0.017674	0.070776	-0.017674	0	0
ENST00000025008	RB1CC1	Q8TDY2	ENSG00000023287	9821	5	134	-24.12	-0.69	92	-24.12	-0.69	0	0	0	0.100828	-0.018151	0.069225	-0.018151	0	0
ENST00000040738	BOD1L1	Q8NFC6	ENSG00000038219	259282	6	71	-9.04	-0.42	57	-9.04	-0.42	0	0	0	0.055643	-0.007085	0.044671	-0.007085	0	0
ENST00000054950	RCN1	Q15293	ENSG00000049449	5954	1	16	-5.49	-0.61	15	-5.49	-0.61	0	0	0	0.012442	-0.004271	0.011664	-0.004271	0	0
ENST00000055335	PPP1R3F	Q6ZSY5	ENSG00000049769	89801	8	61	-9.24	-0.66	55	-9.24	-0.66	0	0	0	0.060516	-0.009166	0.054563	-0.009166	0	0
ENST00000159087	ANO8	Q9HCE9	ENSG00000074855	57719	9	53	-9.43	-0.38	47	-9.43	-0.38	0	0	0	0.178451	-0.031744	0.158249	-0.031744	0	0
ENST00000160373	CTTNBP2	Q8WZ74	ENSG00000077063	83992	9	63	-13.49	-0.53	59	-13.49	-0.53	0	0	0	0.070866	-0.015178	0.066367	-0.015178	0	0
ENST00000161863	YTHDC2	Q9H6S0	ENSG00000047188	64848	5	27	-7.13	-0.57	21	-7.13	-0.57	0	0	0	0.014892	-0.003935	0.011583	-0.003935	0	0
ENST00000162391	FOXJ2	Q9P0K8	ENSG00000065970	55810	8	84	-11.79	-0.49	57	-11.79	-0.49	0	0	0	0.031627	-0.004439	0.021461	-0.004439	0	0
ENST00000163416	GOLGA5	Q8TBA6	ENSG00000066455	9950	6	8	-2.32	-0.3	8	-2.32	-0.3	0	0	0	0.015385	-0.004471	0.015385	-0.004471	0	0
ENST00000164024	CELSR3	Q9NYQ7	ENSG00000008300	1951	9	173	-12.54	-0.51	148	-12.54	-0.51	0	0	0	0.099482	-0.007211	0.085106	-0.007211	0	0
ENST00000164133	PPP2R5B	Q15173	ENSG00000068971	5526	9	15	-4.79	-0.53	11	-4.79	-0.53	0	0	0	0.023734	-0.007574	0.017405	-0.007574	0	0
ENST00000165698	REEP1	Q9H902	ENSG00000068615	65055	9	205	-39.2	-0.74	167	-39.2	-0.74	0	0	0	0.065916	-0.012604	0.053698	-0.012604	0	0
ENST00000171111	KEAP1	Q14145	ENSG00000079999	9817	2	7	-2.67	-0.64	7	-2.67	-0.64	0	0	0	0.013084	-0.004991	0.013084	-0.004991	0	0
ENST00000174653	AP3M2	P53677	ENSG00000070718	10947	9	17	-2.38	-0.32	13	-2.38	-0.32	0	0	0	0.008	-0.001118	0.006118	-0.001118	0	0
ENST00000185150	ERLEC1	Q96DZ1	ENSG00000068912	27248	7	11	-3.26	-0.5	10	-3.26	-0.5	0	0	0	0.012896	-0.003816	0.011723	-0.003816	0	0
ENST00000188376	SLC25A3	Q00325	ENSG00000075415	5250	3	44	-13.67	-0.98	36	-13.67	-0.98	0	0	0	0.09322	-0.02896	0.076271	-0.02896	0	0
ENST00000190611	OSBPL6	Q9BZF3	ENSG00000079156	114880	6	150	-23.81	-0.64	111	-23.81	-0.64	0	0	0	0.02045	-0.003247	0.015133	-0.003247	0	0
ENST00000192788	UHRF1BP1	Q6BDS2	ENSG00000065060	54887	2	95	-9.92	-0.61	55	-9.92	-0.61	0	0	0	0.018704	-0.001954	0.010829	-0.001954	0	0
ENST00000193403	ACTN1	P12814	ENSG00000072110	87	1	63	-12.43	-0.48	53	-12.43	-0.48	0	0	0	0.087622	-0.017293	0.073713	-0.017293	0	0
ENST00000194900	DLG3	Q92796	ENSG00000082458	1741	9	182	-15.47	-0.83	142	-15.47	-0.83	0	0	0	0.056452	-0.0048	0.044045	-0.0048	0	0
ENST00000195173	SEMA5B	Q9P283	ENSG00000082684	54437	1	34	-7.05	-0.47	31	-7.05	-0.47	0	0	0	0.035677	-0.007401	0.032529	-0.007401	0	0
ENST00000196169	TDRD3	Q9H7E2	ENSG00000083544	81550	3	2	-0.51	-0.26	2	-0.51	-0.26	0	0	0	0.007194	-0.00182	0.007194	-0.00182	0	0
ENST00000196371	OXCT1	P55809	ENSG00000083720	5019	7	11	-2.91	-0.35	11	-2.91	-0.35	0	0	0	0.006599	-0.001747	0.006599	-0.001747	0	0
ENST00000199320	DIMT1	Q9UNQ2	ENSG00000086189	27292	5	24	-7.48	-0.78	22	-7.48	-0.78	0	0	0	0.013644	-0.004255	0.012507	-0.004255	0	0
ENST00000199448	EPDR1	Q9UM22	ENSG00000086289	54749	1	14	-5.71	-0.84	13	-5.71	-0.84	0	0	0	0.009044	-0.003688	0.008398	-0.003688	0	0
ENST00000199814	RBM22	Q9NW64	ENSG00000086589	55696	5	27	-5.27	-0.49	22	-5.27	-0.49	0	0	0	0.028125	-0.005491	0.022917	-0.005491	0	0
ENST00000201031	TFAP2C	Q92754	ENSG00000087510	7022	1	37	-13.32	-0.66	36	-13.32	-0.66	0	0	0	0.029065	-0.010464	0.02828	-0.010464	0	0
ENST00000202816	ESF1	Q9H501	ENSG00000089048	51575	5	23	-3.52	-0.42	19	-3.52	-0.42	0	0	0	0.041441	-0.006339	0.034234	-0.006339	0	0
ENST00000203166	HAUS5	O94927	ENSG00000249115	23354	1	9	-1.64	-0.5	7	-1.64	-0.5	0	0	0	0.003815	-0.000694	0.002967	-0.000694	0	0
ENST00000203556	GMIP	Q9P107	ENSG00000089639	51291	7	7	-2	-0.57	4	-2	-0.57	0	0	0	0.014286	-0.004078	0.008163	-0.004078	0	0
ENST00000203664	OTUB2	Q96DC9	ENSG00000089723	78990	7	83	-18.59	-0.76	57	-18.59	-0.76	0	0	0	0.027566	-0.006174	0.018931	-0.006174	0	0
ENST00000204726	GOLGA3	Q08378	ENSG00000090615	2802	8	86	-15.1	-0.71	68	-15.1	-0.71	0	0	0	0.020481	-0.003597	0.016194	-0.003597	0	0
ENST00000204961	EFNB1	P98172	ENSG00000090776	1947	1	50	-7.7	-0.44	50	-7.7	-0.44	0	0	0	0.033422	-0.005148	0.033422	-0.005148	0	0
ENST00000205194	NAT14	Q8WUY8	ENSG00000090971	57106	4	6	-2.57	-0.56	6	-2.57	-0.56	0	0	0	0.009756	-0.004172	0.009756	-0.004172	0	0
ENST00000209875	CBX5	P45973	ENSG00000094916	23468	4	690	-83.61	-0.98	356	-83.61	-0.98	0	0	0	0.063783	-0.007728	0.032908	-0.007728	0	0
ENST00000210633	SEMA4G	Q9NTN9	ENSG00000095539	57715	9	115	-20.9	-1.25	92	-20.9	-1.25	0	0	0	0.077337	-0.014052	0.06187	-0.014052	0	0
ENST00000212015	SIRT1	Q96EB6	ENSG00000096717	23411	6	190	-48.32	-0.68	172	-48.32	-0.68	0	0	0	0.105556	-0.026843	0.095556	-0.026843	0	0
ENST00000215095	STX1B	P61266	ENSG00000099365	112755	9	81	-7.89	-0.73	54	-7.89	-0.73	0	0	0	0.022702	-0.00221	0.015135	-0.00221	0	0
ENST00000215730	SNAP29	O95721	ENSG00000099940	9342	8	60	-12.75	-0.87	40	-12.75	-0.87	0	0	0	0.017725	-0.003766	0.011817	-0.003766	0	0
ENST00000215832	MAPK1	P28482	ENSG00000100030	5594	1	569	-60.33	-1.02	317	-60.33	-1.02	0	0	0	0.058341	-0.006186	0.032503	-0.006186	0	0
ENST00000215882	SLC25A1	P53007	ENSG00000100075	6576	7	28	-6.25	-0.57	28	-6.25	-0.57	0	0	0	0.050179	-0.011197	0.050179	-0.011197	0	0
ENST00000215904	PDXP	Q96GD0	ENSG00000241360	57026	9	10	-1.69	-0.55	8	-1.69	-0.55	0	0	0	0.009381	-0.001585	0.007505	-0.001585	0	0
ENST00000215909	LGALS1	P09382	ENSG00000100097	3956	2	8	-3.67	-0.55	8	-3.67	-0.55	0	0	0	0.133333	-0.061233	0.133333	-0.061233	0	0
ENST00000215919	PATZ1	Q9HBE1	ENSG00000100105	23598	2	4	-1.32	-0.64	3	-1.32	-0.64	0	0	0	0.005472	-0.001806	0.004104	-0.001806	0	0
ENST00000216121	NIPSNAP1	Q9BPW8	ENSG00000184117	8508	7	10	-3.46	-0.45	10	-3.46	-0.45	0	0	0	0.00885	-0.003058	0.00885	-0.003058	0	0
ENST00000216122	MCM5	P33992	ENSG00000100297	4174	1	7	-0.48	-0.23	6	-0.48	-0.23	0	0	0	0.005942	-0.000408	0.005093	-0.000408	0	0
ENST00000216129	TTLL12	Q14166	ENSG00000100304	23170	9	11	-3.38	-0.67	10	-3.38	-0.67	0	0	0	0.007919	-0.002434	0.007199	-0.002434	0	0
ENST00000216144	CABP7	Q86V35	ENSG00000100314	164633	4	109	-12.02	-0.59	78	-12.02	-0.59	0	0	0	0.047954	-0.005286	0.034316	-0.005286	0	0
ENST00000216181	MYH9	P35579	ENSG00000100345	4627	2	165	-26.03	-0.75	136	-26.03	-0.75	0	0	0	0.118364	-0.018674	0.097561	-0.018674	0	0
ENST00000216254	ACO2	Q99798	ENSG00000100412	50	9	7	-0.7	-0.14	7	-0.7	-0.14	0	0	0	0.01847	-0.00186	0.01847	-0.00186	0	0
ENST00000216297	SUPT16H	Q9Y5B9	ENSG00000092201	11198	1	58	-9.38	-0.49	51	-9.38	-0.49	0	0	0	0.048173	-0.007792	0.042359	-0.007792	0	0
ENST00000216468	TMED8	Q6PL24	ENSG00000100580	283578	9	236	-28.97	-0.94	114	-28.97	-0.94	0	0	0	0.034947	-0.00429	0.016881	-0.00429	0	0
ENST00000216500	DHRS7	Q9Y394	ENSG00000100612	51635	2	3	-0.92	-0.5	3	-0.92	-0.5	0	0	0	0.003534	-0.001081	0.003534	-0.001081	0	0
ENST00000216605	MTHFD1	P11586	ENSG00000100714	4522	1	38	-2.04	-0.32	25	-2.04	-0.32	0	0	0	0.150198	-0.008063	0.098814	-0.008063	0	0
ENST00000216639	VRK1	Q99986	ENSG00000100749	7443	3	4	-1.17	-0.34	4	-1.17	-0.34	0	0	0	0.009804	-0.002868	0.009804	-0.002868	0	0
ENST00000216733	EFS	O43281	ENSG00000100842	10278	1	25	-4.41	-0.58	25	-4.41	-0.58	0	0	0	0.03023	-0.005336	0.03023	-0.005336	0	0
ENST00000216832	PNN	Q9H307	ENSG00000100941	5411	1	74	-17.06	-0.51	57	-17.06	-0.51	0	0	0	0.054492	-0.012565	0.041973	-0.012565	0	0
ENST00000216951	GSS	P48637	ENSG00000100983	2937	7	8	-2.22	-0.53	8	-2.22	-0.53	0	0	0	0.020101	-0.005588	0.020101	-0.005588	0	0
ENST00000216962	PYGB	P11216	ENSG00000100994	5834	6	6	-0.63	-0.27	6	-0.63	-0.27	0	0	0	0.004013	-0.000423	0.004013	-0.000423	0	0
ENST00000217246	MACROD2	A1Z1Q3	ENSG00000172264	140733	7	117	-16.28	-0.54	73	-16.28	-0.54	0	0	0	0.035199	-0.004897	0.021961	-0.004897	0	0
ENST00000217402	CHMP4B	Q9H444	ENSG00000101421	128866	3	31	-11.08	-0.49	31	-11.08	-0.49	0	0	0	0.038319	-0.013695	0.038319	-0.013695	0	0
ENST00000217426	AHCY	P23526	ENSG00000101444	191	1	51	-7.65	-0.49	41	-7.65	-0.49	0	0	0	0.06632	-0.009944	0.053316	-0.009944	0	0
ENST00000217971	PGRMC1	O00264	ENSG00000101856	10857	4	46	-13.96	-0.94	39	-13.96	-0.94	0	0	0	0.03786	-0.011489	0.032099	-0.011489	0	0
ENST00000218197	SLC25A14	O95258	ENSG00000102078	9016	9	4	-1.62	-0.43	4	-1.62	-0.43	0	0	0	0.009662	-0.003923	0.009662	-0.003923	0	0
ENST00000218340	RP2	O75695	ENSG00000102218	6102	1	62	-7.52	-0.63	33	-7.52	-0.63	0	0	0	0.02392	-0.0029	0.012731	-0.0029	0	0
ENST00000218364	HTATSF1	O43719	ENSG00000102241	27336	4	5	-1.38	-0.31	5	-1.38	-0.31	0	0	0	0.014881	-0.004101	0.014881	-0.004101	0	0
ENST00000219252	POLR2C	P19387	ENSG00000102978	5432	5	19	-4.89	-0.5	18	-4.89	-0.5	0	0	0	0.021253	-0.005469	0.020134	-0.005469	0	0
ENST00000219281	USB1	Q9BQ65	ENSG00000103005	79650	9	32	-5.53	-0.83	21	-5.53	-0.83	0	0	0	0.023256	-0.00402	0.015262	-0.00402	0	0
ENST00000219302	NME3	Q13232	ENSG00000103024	4832	9	4	-0.62	-0.17	4	-0.62	-0.17	0	0	0	0.010929	-0.001708	0.010929	-0.001708	0	0
ENST00000219345	PLA2G15	Q8NCC3	ENSG00000103066	23659	9	41	-9.09	-0.49	34	-9.09	-0.49	0	0	0	0.029119	-0.006453	0.024148	-0.006453	0	0
ENST00000219439	HSDL1	Q3SXM5	ENSG00000103160	83693	9	31	-6.95	-0.56	27	-6.95	-0.56	0	0	0	0.01318	-0.002955	0.01148	-0.002955	0	0
ENST00000219689	USP31	Q70CQ4	ENSG00000103404	57478	9	333	-26.35	-0.72	180	-26.35	-0.72	0	0	0	0.050128	-0.003967	0.027096	-0.003967	0	0
ENST00000219782	MAZ	P56270	ENSG00000103495	4150	3	28	-4.98	-0.37	26	-4.98	-0.37	0	0	0	0.025157	-0.004476	0.02336	-0.004476	0	0
ENST00000219837	KNOP1	Q1ED39	ENSG00000103550	400506	1	33	-6.36	-1.11	18	-6.36	-1.11	0	0	0	0.006628	-0.001278	0.003615	-0.001278	0	0
ENST00000220003	CSK	P41240	ENSG00000103653	1445	9	30	-6.64	-0.41	28	-6.64	-0.41	0	0	0	0.043605	-0.009647	0.040698	-0.009647	0	0
ENST00000220478	SCG3	Q8WXD2	ENSG00000104112	29106	9	18	-4.35	-0.85	12	-4.35	-0.85	0	0	0	0.011936	-0.002886	0.007958	-0.002886	0	0
ENST00000220509	VPS18	Q9P253	ENSG00000104142	57617	8	69	-6.34	-0.75	30	-6.34	-0.75	0	0	0	0.10832	-0.009961	0.047096	-0.009961	0	0
ENST00000220562	EXTL3	O43909	ENSG00000012232	2137	7	99	-12.66	-0.47	77	-12.66	-0.47	0	0	0	0.035057	-0.004483	0.027266	-0.004483	0	0
ENST00000220584	FDFT1	P37268	ENSG00000079459	2222	4	5	-1.5	-0.52	5	-1.5	-0.52	0	0	0	0.007112	-0.002137	0.007112	-0.002137	0	0
ENST00000220592	AGO2	Q9UKV8	ENSG00000123908	27161	3	1327	-1081.94	-7.27	783	-1081.94	-7.27	0	0	0	0.111597	-0.090988	0.065848	-0.090988	0	0
ENST00000220597	PAG1	Q9NWQ8	ENSG00000076641	55824	6	360	-38.2	-0.84	182	-38.2	-0.84	0	0	0	0.041204	-0.004372	0.020831	-0.004372	0	0
ENST00000220764	DECR1	Q16698	ENSG00000104325	1666	2	3	-1.3	-0.61	3	-1.3	-0.61	0	0	0	0.026316	-0.011447	0.026316	-0.011447	0	0
ENST00000220772	SFRP1	Q8N474	ENSG00000104332	6422	1	56	-12.73	-0.76	44	-12.73	-0.76	0	0	0	0.017435	-0.003964	0.013699	-0.003964	0	0
ENST00000220822	GDAP1	Q8TB36	ENSG00000104381	54332	8	38	-3.71	-0.47	24	-3.71	-0.47	0	0	0	0.015127	-0.001479	0.009554	-0.001479	0	0
ENST00000220913	CHRAC1	Q9NRG0	ENSG00000104472	54108	1	3	-0.81	-0.47	3	-0.81	-0.47	0	0	0	0.001585	-0.000427	0.001585	-0.000427	0	0
ENST00000221086	MTMR9	Q96QG7	ENSG00000104643	66036	8	178	-24.89	-0.81	115	-24.89	-0.81	0	0	0	0.033203	-0.004642	0.021451	-0.004642	0	0
ENST00000221114	DCTN6	O00399	ENSG00000104671	10671	8	51	-11.56	-0.94	32	-11.56	-0.94	0	0	0	0.108511	-0.024594	0.068085	-0.024594	0	0
ENST00000221130	GSR	P00390	ENSG00000104687	2936	8	37	-5.38	-0.48	23	-5.38	-0.48	0	0	0	0.025308	-0.003683	0.015732	-0.003683	0	0
ENST00000221419	HNRNPL	P14866	ENSG00000104824	3191	3	38	-8.74	-0.7	33	-8.74	-0.7	0	0	0	0.11276	-0.025935	0.097923	-0.025935	0	0
ENST00000221566	SGTA	O43765	ENSG00000104969	6449	9	34	-8.37	-0.56	27	-8.37	-0.56	0	0	0	0.027665	-0.006814	0.021969	-0.006814	0	0
ENST00000221891	APLP1	P51693	ENSG00000105290	333	9	2	-0.09	-0.05	2	-0.09	-0.05	0	0	0	0.005714	-0.00026	0.005714	-0.00026	0	0
ENST00000221922	CCDC9	Q9Y3X0	ENSG00000105321	26093	2	56	-6.09	-0.64	40	-6.09	-0.64	0	0	0	0.201439	-0.021899	0.143885	-0.021899	0	0
ENST00000221957	PLIN3	O60664	ENSG00000105355	10226	1	6	-2.14	-0.6	6	-2.14	-0.6	0	0	0	0.007026	-0.002509	0.007026	-0.002509	0	0
ENST00000222120	RAB3D	O95716	ENSG00000105514	9545	9	95	-14.82	-0.89	54	-14.82	-0.89	0	0	0	0.028316	-0.004418	0.016095	-0.004418	0	0
ENST00000222219	DNASE2	O00115	ENSG00000105612	1777	3	11	-5.83	-0.81	11	-5.83	-0.81	0	0	0	0.014066	-0.00745	0.014066	-0.00745	0	0
ENST00000222254	PIK3R2	O00459	ENSG00000105647	5296	7	15	-3.79	-0.4	15	-3.79	-0.4	0	0	0	0.01201	-0.003038	0.01201	-0.003038	0	0
ENST00000222256	RAB3A	P20336	ENSG00000105649	5864	9	6	-2.65	-0.81	6	-2.65	-0.81	0	0	0	0.008708	-0.00384	0.008708	-0.00384	0	0
ENST00000222330	GSK3A	P49840	ENSG00000105723	2931	9	6	-1.77	-0.36	6	-1.77	-0.36	0	0	0	0.00982	-0.002895	0.00982	-0.002895	0	0
ENST00000222374	CADM4	Q8NFZ8	ENSG00000105767	199731	6	49	-8.95	-0.43	43	-8.95	-0.43	0	0	0	0.050777	-0.009273	0.04456	-0.009273	0	0
ENST00000222573	ITGB8	P26012	ENSG00000105855	3696	1	411	-59.35	-0.92	272	-59.35	-0.92	0	0	0	0.071354	-0.010304	0.047222	-0.010304	0	0
ENST00000222673	OGDH	Q02218	ENSG00000105953	4967	9	16	-4.19	-0.61	14	-4.19	-0.61	0	0	0	0.014953	-0.003916	0.013084	-0.003916	0	0
ENST00000222792	CHN2	P52757	ENSG00000106069	1124	7	69	-12.93	-0.53	62	-12.93	-0.53	0	0	0	0.043233	-0.008105	0.038847	-0.008105	0	0
ENST00000222803	FKBP14	Q9NWM8	ENSG00000106080	55033	2	53	-7.97	-0.82	34	-7.97	-0.82	0	0	0	0.012768	-0.001919	0.008191	-0.001919	0	0
ENST00000223023	WASL	O00401	ENSG00000106299	8976	2	232	-41.85	-1.16	146	-41.85	-1.16	0	0	0	0.089679	-0.016179	0.056436	-0.016179	0	0
ENST00000223073	RBM28	Q9NW13	ENSG00000106344	55131	5	134	-4.48	-0.35	41	-4.48	-0.35	0	0	0	0.010217	-0.000342	0.003126	-0.000342	0	0
ENST00000223129	RPA3	P35244	ENSG00000106399	6119	1	17	-5.43	-1.26	11	-5.43	-1.26	0	0	0	0.035052	-0.011202	0.02268	-0.011202	0	0
ENST00000223145	GLCCI1	Q86VQ1	ENSG00000106415	113263	1	222	-46.82	-0.78	181	-46.82	-0.78	0	0	0	0.08723	-0.018396	0.07112	-0.018396	0	0
ENST00000223369	YKT6	O15498	ENSG00000106636	10652	9	6	-1.24	-0.33	5	-1.24	-0.33	0	0	0	0.002978	-0.000614	0.002481	-0.000614	0	0
ENST00000223398	CLIP2	Q9UDT6	ENSG00000106665	7461	8	69	-6.18	-0.41	50	-6.18	-0.41	0	0	0	0.032888	-0.002946	0.023832	-0.002946	0	0
ENST00000224140	SETX	Q7Z333	ENSG00000107290	23064	2	46	-1.58	-0.18	31	-1.58	-0.18	0	0	0	0.015939	-0.000548	0.010742	-0.000548	0	0
ENST00000224237	VIM	P08670	ENSG00000026025	7431	1	38	-13.38	-0.54	34	-13.38	-0.54	0	0	0	0.116923	-0.041154	0.104615	-0.041154	0	0
ENST00000225174	PPIF	P30405	ENSG00000108179	10105	3	50	-15.37	-0.88	43	-15.37	-0.88	0	0	0	0.033378	-0.01026	0.028705	-0.01026	0	0
ENST00000225394	GIT1	Q9Y2X7	ENSG00000108262	28964	9	107	-16.4	-0.4	83	-16.4	-0.4	0	0	0	0.08657	-0.013268	0.067152	-0.013268	0	0
ENST00000225525	TAX1BP3	O14907	ENSG00000213977	30851	4	8	-1.47	-0.3	8	-1.47	-0.3	0	0	0	0.009423	-0.001728	0.009423	-0.001728	0	0
ENST00000225577	RPS6KB1	P23443	ENSG00000108443	6198	6	327	-36.05	-0.55	193	-36.05	-0.55	0	0	0	0.086531	-0.009539	0.051072	-0.009539	0	0
ENST00000225655	PFN1	P07737	ENSG00000108518	5216	1	29	-9.73	-0.72	27	-9.73	-0.72	0	0	0	0.115538	-0.038753	0.10757	-0.038753	0	0
ENST00000225665	SLC25A11	Q02978	ENSG00000108528	8402	9	68	-9.16	-0.74	38	-9.16	-0.74	0	0	0	0.110749	-0.014925	0.061889	-0.014925	0	0
ENST00000225698	C1QBP	Q07021	ENSG00000108561	708	7	5	-2.2	-0.47	5	-2.2	-0.47	0	0	0	0.020747	-0.009112	0.020747	-0.009112	0	0
ENST00000225719	CPD	O75976	ENSG00000108582	1362	7	339	-30.81	-0.71	212	-30.81	-0.71	0	0	0	0.065469	-0.005949	0.040942	-0.005949	0	0
ENST00000225726	CCDC47	Q96A33	ENSG00000108588	57003	1	21	-10.45	-0.76	20	-10.45	-0.76	0	0	0	0.012852	-0.006398	0.01224	-0.006398	0	0
ENST00000225916	KAT2A	Q92830	ENSG00000108773	2648	3	26	-4.96	-0.39	23	-4.96	-0.39	0	0	0	0.047794	-0.009112	0.042279	-0.009112	0	0
ENST00000226004	DUSP3	P51452	ENSG00000108861	1845	7	147	-27.47	-0.78	96	-27.47	-0.78	0	0	0	0.042108	-0.007869	0.027499	-0.007869	0	0
ENST00000226319	JADE1	Q6IE81	ENSG00000077684	79960	1	176	-27.14	-0.75	121	-27.14	-0.75	0	0	0	0.059359	-0.009152	0.040809	-0.009152	0	0
ENST00000227520	CCDC86	Q9H6F5	ENSG00000110104	79080	1	4	-1.61	-0.42	4	-1.61	-0.42	0	0	0	0.00527	-0.00212	0.00527	-0.00212	0	0
ENST00000227638	PANX1	Q96RD7	ENSG00000110218	24145	9	44	-4.12	-0.61	21	-4.12	-0.61	0	0	0	0.039783	-0.003722	0.018987	-0.003722	0	0
ENST00000227758	BIRC2	Q13490	ENSG00000110330	329	1	3	-1.58	-0.6	3	-1.58	-0.6	0	0	0	0.006122	-0.003222	0.006122	-0.003222	0	0
ENST00000228284	SART3	Q15020	ENSG00000075856	9733	6	35	-4.36	-0.28	29	-4.36	-0.28	0	0	0	0.039773	-0.004951	0.032955	-0.004951	0	0
ENST00000228825	ARPC3	O15145	ENSG00000111229	10094	9	18	-6.81	-1.32	12	-6.81	-1.32	0	0	0	0.054054	-0.020444	0.036036	-0.020444	0	0
ENST00000228872	CDKN1B	P46527	ENSG00000111276	1027	6	138	-41.97	-1.64	119	-41.97	-1.64	0	0	0	0.10245	-0.031156	0.088344	-0.031156	0	0
ENST00000229179	NUP107	P57740	ENSG00000111581	57122	1	16	-4.32	-0.44	14	-4.32	-0.44	0	0	0	0.004776	-0.001291	0.004179	-0.001291	0	0
ENST00000229201	TIMELESS	Q9UNS1	ENSG00000111602	8914	1	21	-1.98	-0.29	17	-1.98	-0.29	0	0	0	0.035	-0.003298	0.028333	-0.003298	0	0
ENST00000229214	KRR1	Q13601	ENSG00000111615	11103	5	85	-9.99	-0.44	54	-9.99	-0.44	0	0	0	0.009496	-0.001116	0.006033	-0.001116	0	0
ENST00000229239	GAPDH	P04406	ENSG00000111640	2597	4	2	-0.68	-0.36	2	-0.68	-0.36	0	0	0	0.009804	-0.003328	0.009804	-0.003328	0	0
ENST00000229270	TPI1	P60174	ENSG00000111669	7167	4	4	-1.56	-0.42	4	-1.56	-0.42	0	0	0	0.007042	-0.002743	0.007042	-0.002743	0	0
ENST00000229329	CMAS	Q8NFW8	ENSG00000111726	55907	9	1	-0.23	-0.23	1	-0.23	-0.23	0	0	0	0.002817	-0.000656	0.002817	-0.000656	0	0
ENST00000229595	ASF1A	Q9Y294	ENSG00000111875	25842	5	97	-28.04	-0.78	81	-28.04	-0.78	0	0	0	0.062339	-0.018024	0.052057	-0.018024	0	0
ENST00000229633	HINT3	Q9NQE9	ENSG00000111911	135114	8	21	-4.22	-0.45	13	-4.22	-0.45	0	0	0	0.008168	-0.00164	0.005056	-0.00164	0	0
ENST00000229854	MCM3	P25205	ENSG00000112118	4172	1	7	-1.15	-0.19	7	-1.15	-0.19	0	0	0	0.012027	-0.001983	0.012027	-0.001983	0	0
ENST00000229922	CAP2	P40123	ENSG00000112186	10486	9	7	-3.3	-0.58	7	-3.3	-0.58	0	0	0	0.005174	-0.002441	0.005174	-0.002441	0	0
ENST00000230122	ZBTB24	O43167	ENSG00000112365	9841	5	8	-0.42	-0.2	6	-0.42	-0.2	0	0	0	0.002454	-0.00013	0.00184	-0.00013	0	0
ENST00000230419	PTK7	Q13308	ENSG00000112655	5754	3	28	-6.28	-0.46	28	-6.28	-0.46	0	0	0	0.033294	-0.007464	0.033294	-0.007464	0	0
ENST00000230449	EXOC2	Q96KP1	ENSG00000112685	55770	9	9	-1.39	-0.42	4	-1.39	-0.42	0	0	0	0.00584	-0.0009	0.002596	-0.0009	0	0
ENST00000230461	TMEM30A	Q9NV96	ENSG00000112697	55754	7	40	-12.42	-0.83	35	-12.42	-0.83	0	0	0	0.012575	-0.003903	0.011003	-0.003903	0	0
ENST00000230792	NUDT12	Q9BQG2	ENSG00000112874	83594	3	6	-1.35	-0.48	5	-1.35	-0.48	0	0	0	0.002987	-0.000672	0.002489	-0.000672	0	0
ENST00000230895	DAP	P51397	ENSG00000112977	1611	3	64	-10.44	-0.88	31	-10.44	-0.88	0	0	0	0.034992	-0.005709	0.016949	-0.005709	0	0
ENST00000230901	BRD8	Q9H0E9	ENSG00000112983	10902	2	5	-1.48	-0.33	5	-1.48	-0.33	0	0	0	0.015198	-0.004502	0.015198	-0.004502	0	0
ENST00000231061	SPARC	P09486	ENSG00000113140	6678	1	87	-17.15	-0.88	62	-17.15	-0.88	0	0	0	0.035109	-0.006922	0.02502	-0.006922	0	0
ENST00000231368	LNPEP	Q9UIQ6	ENSG00000113441	4012	1	386	-30.15	-0.55	202	-30.15	-0.55	0	0	0	0.04296	-0.003356	0.022482	-0.003356	0	0
ENST00000231498	NUP155	O75694	ENSG00000113569	9631	1	67	-6.9	-0.51	35	-6.9	-0.51	0	0	0	0.017791	-0.001834	0.009294	-0.001834	0	0
ENST00000231524	TRIM23	P36406	ENSG00000113595	373	5	89	-22.73	-1.25	65	-22.73	-1.25	0	0	0	0.042543	-0.010865	0.031071	-0.010865	0	0
ENST00000232564	GNB4	Q9HAV0	ENSG00000114450	59345	2	112	-18.68	-1.01	68	-18.68	-1.01	0	0	0	0.021845	-0.003644	0.013263	-0.003644	0	0
ENST00000232905	EIF1B	O60739	ENSG00000114784	10289	5	29	-7.88	-0.7	26	-7.88	-0.7	0	0	0	0.070218	-0.01907	0.062954	-0.01907	0	0
ENST00000232978	NKTR	P30414	ENSG00000114857	4820	5	11	-0.82	-0.37	5	-0.82	-0.37	0	0	0	0.003973	-0.000298	0.001806	-0.000298	0	0
ENST00000233057	EIF2AK2	P19525	ENSG00000055332	5610	1	36	-2.93	-0.45	17	-2.93	-0.45	0	0	0	0.004463	-0.000364	0.002108	-0.000364	0	0
ENST00000233121	MAPRE3	Q9UPY8	ENSG00000084764	22924	9	38	-10.3	-0.79	33	-10.3	-0.79	0	0	0	0.044653	-0.012101	0.038778	-0.012101	0	0
ENST00000233143	TMSB10	P63313	ENSG00000034510	9168	9	32	-14.18	-0.67	32	-14.18	-0.67	0	0	0	0.12549	-0.055592	0.12549	-0.055592	0	0
ENST00000233146	MSH2	P43246	ENSG00000095002	4436	1	44	-4.79	-0.59	26	-4.79	-0.59	0	0	0	0.156028	-0.016986	0.092199	-0.016986	0	0
ENST00000233190	NDUFS1	P28331	ENSG00000023228	4719	3	22	-0.99	-0.26	6	-0.99	-0.26	0	0	0	0.002348	-0.000105	0.00064	-0.000105	0	0
ENST00000233336	TTL	Q8NG68	ENSG00000114999	150465	8	143	-18.94	-0.82	82	-18.94	-0.82	0	0	0	0.011045	-0.001463	0.006334	-0.001463	0	0
ENST00000233379	FAHD2A	Q96GK7	ENSG00000115042	51011	1	73	-8.39	-0.66	54	-8.39	-0.66	0	0	0	0.019934	-0.002291	0.014746	-0.002291	0	0
ENST00000233575	SNX17	Q15036	ENSG00000115234	9784	5	75	-18.79	-0.89	65	-18.79	-0.89	0	0	0	0.182039	-0.045602	0.157767	-0.045602	0	0
ENST00000233607	APC2	O95996	ENSG00000115266	10297	8	29	-2.06	-0.23	18	-2.06	-0.23	0	0	0	0.009558	-0.000679	0.005933	-0.000679	0	0
ENST00000233813	IGFBP5	P24593	ENSG00000115461	3488	6	236	-35.23	-0.91	122	-35.23	-0.91	0	0	0	0.050764	-0.007577	0.026242	-0.007577	0	0
ENST00000234310	PPP3R1	P63098	ENSG00000221823	5534	9	210	-52.46	-0.68	184	-52.46	-0.68	0	0	0	0.099573	-0.024873	0.087245	-0.024873	0	0
ENST00000234420	MSH6	P52701	ENSG00000116062	2956	1	264	-26.28	-0.44	196	-26.28	-0.44	0	0	0	0.081381	-0.0081	0.060419	-0.0081	0	0
ENST00000234454	SPR	P35270	ENSG00000116096	6697	1	6	-1.54	-0.35	6	-1.54	-0.35	0	0	0	0.009615	-0.002463	0.009615	-0.002463	0	0
ENST00000234590	ENO1	P06733	ENSG00000074800	2023	4	8	-2.49	-0.6	5	-2.49	-0.6	0	0	0	0.022039	-0.006857	0.013774	-0.006857	0	0
ENST00000235835	AKR7A2	O43488	ENSG00000053371	8574	1	6	-1.56	-0.39	6	-1.56	-0.39	0	0	0	0.022814	-0.00592	0.022814	-0.00592	0	0
ENST00000236192	VAMP4	O75379	ENSG00000117533	8674	8	95	-24.5	-0.77	64	-24.5	-0.77	0	0	0	0.021844	-0.005634	0.014716	-0.005634	0	0
ENST00000236957	EEF1B2	P24534	ENSG00000114942	1933	3	5	-2.92	-0.66	5	-2.92	-0.66	0	0	0	0.104167	-0.060875	0.104167	-0.060875	0	0
ENST00000236959	ATIC	P31939	ENSG00000138363	471	3	1	-0.35	-0.35	1	-0.35	-0.35	0	0	0	0.009009	-0.003198	0.009009	-0.003198	0	0
ENST00000237264	TBPL1	P62380	ENSG00000028839	9519	9	169	-47.24	-0.62	137	-47.24	-0.62	0	0	0	0.049779	-0.013913	0.040353	-0.013913	0	0
ENST00000237500	MYL12B	O14950	ENSG00000118680	103910	5	6	-3.34	-0.58	6	-3.34	-0.58	0	0	0	0.017143	-0.00954	0.017143	-0.00954	0	0
ENST00000237530	RPN2	P04844	ENSG00000118705	6185	1	11	-1.88	-0.24	10	-1.88	-0.24	0	0	0	0.03537	-0.006039	0.032154	-0.006039	0	0
ENST00000237937	ZFAND5	O76080	ENSG00000107372	7763	5	392	-69.8	-0.96	246	-69.8	-0.96	0	0	0	0.086515	-0.015405	0.054293	-0.015405	0	0
ENST00000238112	CPSF3	Q9UKF6	ENSG00000119203	51692	1	3	-1.2	-0.44	3	-1.2	-0.44	0	0	0	0.034483	-0.013793	0.034483	-0.013793	0	0
ENST00000238156	CCDC92	Q53HC0	ENSG00000119242	80212	9	76	-16.88	-0.93	52	-16.88	-0.93	0	0	0	0.052814	-0.011729	0.036136	-0.011729	0	0
ENST00000238497	VPS4B	O75351	ENSG00000119541	9525	5	73	-19.92	-0.69	62	-19.92	-0.69	0	0	0	0.040828	-0.011139	0.034676	-0.011139	0	0
ENST00000238616	NEK9	Q8TD19	ENSG00000119638	91754	1	180	-24.29	-0.79	118	-24.29	-0.79	0	0	0	0.034522	-0.004658	0.022631	-0.004658	0	0
ENST00000238647	IRF2BPL	Q9H1B7	ENSG00000119669	64207	7	115	-19.45	-0.38	108	-19.45	-0.38	0	0	0	0.133411	-0.022568	0.12529	-0.022568	0	0
ENST00000238875	LGALSL	Q3ZCW2	ENSG00000119862	29094	9	224	-54.42	-1.1	168	-54.42	-1.1	0	0	0	0.075778	-0.018409	0.056834	-0.018409	0	0
ENST00000239690	NUDCD1	Q96RS6	ENSG00000120526	84955	1	20	-5.93	-0.56	17	-5.93	-0.56	0	0	0	0.009556	-0.002832	0.008122	-0.002832	0	0
ENST00000240055	NFYB	P25208	ENSG00000120837	4801	1	177	-27.7	-0.64	115	-27.7	-0.64	0	0	0	0.066466	-0.0104	0.043184	-0.0104	0	0
ENST00000240123	SORBS3	O60504	ENSG00000120896	10174	3	37	-4.17	-0.45	30	-4.17	-0.45	0	0	0	0.034807	-0.003924	0.028222	-0.003924	0	0
ENST00000240185	TARDBP	Q13148	ENSG00000120948	23435	3	215	-34.52	-0.69	165	-34.52	-0.69	0	0	0	0.057044	-0.009158	0.043778	-0.009158	0	0
ENST00000240285	RDH10	Q8IZV5	ENSG00000121039	157506	1	100	-21.42	-0.63	75	-21.42	-0.63	0	0	0	0.044484	-0.009526	0.033363	-0.009526	0	0
ENST00000240316	COIL	P38432	ENSG00000121058	8161	9	26	-8.94	-0.67	25	-8.94	-0.67	0	0	0	0.029312	-0.010085	0.028185	-0.010085	0	0
ENST00000240423	NCAPH	Q15003	ENSG00000121152	23397	1	7	-1.31	-0.42	4	-1.31	-0.42	0	0	0	0.014085	-0.002638	0.008048	-0.002638	0	0
ENST00000240851	TFG	Q92734	ENSG00000114354	10342	1	50	-12.8	-1.18	39	-12.8	-1.18	0	0	0	0.114155	-0.029224	0.089041	-0.029224	0	0
ENST00000240922	NAA50	Q9GZZ1	ENSG00000121579	80218	1	459	-80.7	-1.12	277	-80.7	-1.12	0	0	0	0.086555	-0.015217	0.052235	-0.015217	0	0
ENST00000241014	MAPK8IP1	Q9UQF2	ENSG00000121653	9479	4	11	-4.42	-0.47	10	-4.42	-0.47	0	0	0	0.014726	-0.00592	0.013387	-0.00592	0	0
ENST00000241416	ACVR2A	P27037	ENSG00000121989	92	7	382	-77.41	-0.88	303	-77.41	-0.88	0	0	0	0.107515	-0.021789	0.08528	-0.021789	0	0
ENST00000241502	FYTTD1	Q96QD9	ENSG00000122068	84248	9	170	-27.66	-0.69	123	-27.66	-0.69	0	0	0	0.029877	-0.004861	0.021617	-0.004861	0	0
ENST00000242059	SCRN1	Q12765	ENSG00000136193	9805	1	67	-8.39	-0.52	43	-8.39	-0.52	0	0	0	0.017371	-0.002176	0.011149	-0.002176	0	0
ENST00000242209	FKBP9	O95302	ENSG00000122642	11328	1	11	-2.58	-0.44	11	-2.58	-0.44	0	0	0	0.006949	-0.001631	0.006949	-0.001631	0	0
ENST00000242315	PHF24	Q9UPV7	ENSG00000122733	23349	7	140	-19.46	-0.78	84	-19.46	-0.78	0	0	0	0.03156	-0.004387	0.018936	-0.004387	0	0
ENST00000242576	UNG	P13051	ENSG00000076248	7374	1	14	-4.39	-0.56	13	-4.39	-0.56	0	0	0	0.013645	-0.004282	0.012671	-0.004282	0	0
ENST00000242719	RNF11	Q9Y3C5	ENSG00000123091	26994	9	379	-70.61	-1.23	264	-70.61	-1.23	0	0	0	0.177434	-0.033059	0.123596	-0.033059	0	0
ENST00000243167	FAAH	O00519	ENSG00000117480	2166	9	1	-0.14	-0.14	1	-0.14	-0.14	0	0	0	0.003663	-0.000531	0.003663	-0.000531	0	0
ENST00000243298	RAB9B	Q9NP90	ENSG00000123570	51209	9	115	-23.41	-0.98	79	-23.41	-0.98	0	0	0	0.04021	-0.008184	0.027622	-0.008184	0	0
ENST00000243563	SNRPA	P09012	ENSG00000077312	6626	3	6	-2.15	-0.38	6	-2.15	-0.38	0	0	0	0.026667	-0.009542	0.026667	-0.009542	0	0
ENST00000243997	ATP5F1E	P56381	ENSG00000124172	514	9	15	-4.24	-0.76	14	-4.24	-0.76	0	0	0	0.004437	-0.001256	0.004141	-0.001256	0	0
ENST00000244007	PLCG1	P19174	ENSG00000124181	5335	6	179	-21.04	-0.61	123	-21.04	-0.61	0	0	0	0.147325	-0.017315	0.101235	-0.017315	0	0
ENST00000244020	SRSF6	Q13247	ENSG00000124193	6431	1	118	-25.88	-0.51	96	-25.88	-0.51	0	0	0	0.037025	-0.008121	0.030122	-0.008121	0	0
ENST00000244061	RNF114	Q9Y508	ENSG00000124226	55905	2	57	-11.22	-0.62	41	-11.22	-0.62	0	0	0	0.032497	-0.006397	0.023375	-0.006397	0	0
ENST00000244458	PACSIN1	Q9BY11	ENSG00000124507	29993	9	66	-8.21	-0.51	53	-8.21	-0.51	0	0	0	0.024408	-0.003036	0.019601	-0.003036	0	0
ENST00000244741	CDKN1A	P38936	ENSG00000124762	1026	1	57	-14.69	-0.6	55	-14.69	-0.6	0	0	0	0.036965	-0.009525	0.035668	-0.009525	0	0
ENST00000244745	SOX4	Q06945	ENSG00000124766	6659	8	419	-73.41	-0.8	338	-73.41	-0.8	0	0	0	0.157341	-0.027568	0.126925	-0.027568	0	0
ENST00000245206	GOT2	P00505	ENSG00000125166	2806	7	39	-8.58	-0.63	31	-8.58	-0.63	0	0	0	0.037392	-0.00823	0.029722	-0.00823	0	0
ENST00000245304	RAP2A	P10114	ENSG00000125249	5911	5	155	-31.83	-0.68	111	-31.83	-0.68	0	0	0	0.033056	-0.006789	0.023672	-0.006789	0	0
ENST00000245479	SOX9	P48436	ENSG00000125398	6662	1	62	-17.05	-0.56	57	-17.05	-0.56	0	0	0	0.030452	-0.008376	0.027996	-0.008376	0	0
ENST00000246024	TMX4	Q9H1E5	ENSG00000125827	56255	8	69	-12.61	-0.65	46	-12.61	-0.65	0	0	0	0.014064	-0.002571	0.009376	-0.002571	0	0
ENST00000246069	DSTN	P60981	ENSG00000125868	11034	7	58	-8.87	-0.82	33	-8.87	-0.82	0	0	0	0.020893	-0.003195	0.011888	-0.003195	0	0
ENST00000246151	PITHD1	Q9GZP4	ENSG00000057757	57095	9	13	-4.34	-0.62	13	-4.34	-0.62	0	0	0	0.015134	-0.00505	0.015134	-0.00505	0	0
ENST00000246747	ARL2	P36404	ENSG00000213465	402	4	48	-16.06	-1.4	34	-16.06	-1.4	0	0	0	0.144578	-0.048364	0.10241	-0.048364	0	0
ENST00000246802	NOP53	Q9NZM5	ENSG00000105373	29997	1	2	-0.59	-0.32	2	-0.59	-0.32	0	0	0	0.035714	-0.010625	0.035714	-0.010625	0	0
ENST00000246868	SBDS	Q9Y3A5	ENSG00000126524	51119	5	19	-6.29	-0.54	19	-6.29	-0.54	0	0	0	0.02726	-0.00902	0.02726	-0.00902	0	0
ENST00000247020	SDF2	Q99470	ENSG00000132581	6388	9	9	-2.84	-0.59	8	-2.84	-0.59	0	0	0	0.014151	-0.004464	0.012579	-0.004464	0	0
ENST00000247026	NSRP1	Q9H0G5	ENSG00000126653	84081	1	10	-2.95	-0.53	10	-2.95	-0.53	0	0	0	0.012438	-0.003665	0.012438	-0.003665	0	0
ENST00000247087	AHDC1	Q5TGY3	ENSG00000126705	27245	9	69	-12.19	-0.48	55	-12.19	-0.48	0	0	0	0.074353	-0.01313	0.059267	-0.01313	0	0
ENST00000247226	PLEKHG3	A1L390	ENSG00000126822	26030	5	139	-14.49	-0.51	108	-14.49	-0.51	0	0	0	0.021231	-0.002213	0.016496	-0.002213	0	0
ENST00000247970	PIN1	Q13526	ENSG00000127445	5300	3	14	-3.43	-0.42	12	-3.43	-0.42	0	0	0	0.028807	-0.007047	0.024691	-0.007047	0	0
ENST00000248098	JPT2	Q9H910	ENSG00000206053	90861	1	39	-10.39	-0.8	29	-10.39	-0.8	0	0	0	0.012617	-0.003362	0.009382	-0.003362	0	0
ENST00000248594	PTPN12	Q05209	ENSG00000127947	5782	1	141	-30.78	-0.85	130	-30.78	-0.85	0	0	0	0.177582	-0.038772	0.163728	-0.038772	0	0
ENST00000248929	SGSM3	Q96HU1	ENSG00000100359	27352	8	3	-0.55	-0.38	2	-0.55	-0.38	0	0	0	0.005629	-0.001032	0.003752	-0.001032	0	0
ENST00000249064	CCDC117	Q8IWD4	ENSG00000159873	150275	5	120	-26.8	-0.73	97	-26.8	-0.73	0	0	0	0.040377	-0.009019	0.032638	-0.009019	0	0
ENST00000249330	VGF	O15240	ENSG00000128564	7425	9	14	-2.82	-0.64	9	-2.82	-0.64	0	0	0	0.028571	-0.005761	0.018367	-0.005761	0	0
ENST00000249700	TMOD2	Q9NZR1	ENSG00000128872	29767	9	233	-32.89	-0.84	115	-32.89	-0.84	0	0	0	0.02943	-0.004155	0.014526	-0.004155	0	0
ENST00000249837	VPS13C	Q709C8	ENSG00000129003	54832	2	16	-2.26	-0.33	13	-2.26	-0.33	0	0	0	0.007726	-0.001092	0.006277	-0.001092	0	0
ENST00000249883	AMOTL2	Q9Y2J4	ENSG00000114019	51421	6	160	-19.36	-0.53	115	-19.36	-0.53	0	0	0	0.087241	-0.010556	0.062704	-0.010556	0	0
ENST00000250113	FXR2	P51116	ENSG00000129245	9513	8	61	-12.29	-0.45	56	-12.29	-0.45	0	0	0	0.101161	-0.020376	0.092869	-0.020376	0	0
ENST00000250263	ERI1	Q8IV48	ENSG00000104626	90459	1	98	-23.72	-1.23	70	-23.72	-1.23	0	0	0	0.029625	-0.00717	0.021161	-0.00717	0	0
ENST00000250489	PIP4P1	Q86T03	ENSG00000165782	90809	9	56	-17.5	-0.66	55	-17.5	-0.66	0	0	0	0.066429	-0.020764	0.065243	-0.020764	0	0
ENST00000250495	NEDD8	Q15843	ENSG00000129559	4738	9	20	-10.8	-1.36	18	-10.8	-1.36	0	0	0	0.071942	-0.038845	0.064748	-0.038845	0	0
ENST00000250559	RAP1B	P61224	ENSG00000127314	5908	3	263	-71.85	-0.96	251	-71.85	-0.96	0	0	0	0.020782	-0.005677	0.019834	-0.005677	0	0
ENST00000251038	ZC3H14	Q6PJT7	ENSG00000100722	79882	1	57	-9.2	-0.89	37	-9.2	-0.89	0	0	0	0.003597	-0.00058	0.002335	-0.00058	0	0
ENST00000251241	DHX40	Q8IX18	ENSG00000108406	79665	1	232	-25.76	-0.55	140	-25.76	-0.55	0	0	0	0.197279	-0.021905	0.119048	-0.021905	0	0
ENST00000251496	NCAPG	Q9BPX3	ENSG00000109805	64151	1	11	-1.96	-0.65	7	-1.96	-0.65	0	0	0	0.007639	-0.001365	0.004861	-0.001365	0	0
ENST00000251527	ESYT2	A0FGR8	ENSG00000117868	57488	5	96	-13.5	-0.54	66	-13.5	-0.54	0	0	0	0.02986	-0.004199	0.020529	-0.004199	0	0
ENST00000251636	DHX29	Q7Z478	ENSG00000067248	54505	9	7	-2.38	-0.38	7	-2.38	-0.38	0	0	0	0.028455	-0.009683	0.028455	-0.009683	0	0
ENST00000251691	ARFGEF3	Q5TH69	ENSG00000112379	57221	9	283	-18.31	-0.61	169	-18.31	-0.61	0	0	0	0.034597	-0.002238	0.02066	-0.002238	0	0
ENST00000251775	SNX4	O95219	ENSG00000114520	8723	9	32	-11.74	-0.88	21	-11.74	-0.88	0	0	0	0.02812	-0.010315	0.018453	-0.010315	0	0
ENST00000251871	MED17	Q9NVC6	ENSG00000042429	9440	5	45	-8.91	-0.67	34	-8.91	-0.67	0	0	0	0.015507	-0.003071	0.011716	-0.003071	0	0
ENST00000251900	SCML2	Q9UQR0	ENSG00000102098	10389	1	99	-23.92	-0.68	91	-23.92	-0.68	0	0	0	0.051031	-0.012329	0.046907	-0.012329	0	0
ENST00000252102	NDUFA2	O43678	ENSG00000131495	4695	7	3	-1.54	-0.64	3	-1.54	-0.64	0	0	0	0.009836	-0.005036	0.009836	-0.005036	0	0
ENST00000252108	UBE4A	Q14139	ENSG00000110344	9354	2	87	-11.12	-0.48	66	-11.12	-0.48	0	0	0	0.031363	-0.004008	0.023792	-0.004008	0	0
ENST00000252445	ELOF1	P60002	ENSG00000130165	84337	9	7	-2.74	-0.49	7	-2.74	-0.49	0	0	0	0.009915	-0.003875	0.009915	-0.003875	0	0
ENST00000252458	CDC16	Q13042	ENSG00000130177	8881	2	6	-3.15	-0.56	6	-3.15	-0.56	0	0	0	0.021201	-0.011138	0.021201	-0.011138	0	0
ENST00000252595	SLC27A1	Q6PCB7	ENSG00000130304	376497	6	40	-6.57	-0.48	34	-6.57	-0.48	0	0	0	0.025657	-0.004213	0.021809	-0.004213	0	0
ENST00000252804	PXDN	Q92626	ENSG00000130508	7837	4	98	-17.67	-0.58	84	-17.67	-0.58	0	0	0	0.042241	-0.007616	0.036207	-0.007616	0	0
ENST00000252891	NUMBL	Q9Y6R0	ENSG00000105245	9253	6	118	-20.68	-0.87	100	-20.68	-0.87	0	0	0	0.075351	-0.013206	0.063857	-0.013206	0	0
ENST00000252934	ATXN10	Q9UBB4	ENSG00000130638	25814	7	25	-7.39	-0.69	17	-7.39	-0.69	0	0	0	0.015253	-0.004508	0.010372	-0.004508	0	0
ENST00000253023	UBE2M	P61081	ENSG00000130725	9040	9	9	-2.29	-0.35	8	-2.29	-0.35	0	0	0	0.023684	-0.006018	0.021053	-0.006018	0	0
ENST00000253024	TRIM28	Q13263	ENSG00000130726	10155	3	3	-0.82	-0.47	2	-0.82	-0.47	0	0	0	0.018072	-0.004934	0.012048	-0.004934	0	0
ENST00000253083	HIP1R	O75146	ENSG00000130787	9026	8	28	-3.26	-0.29	22	-3.26	-0.29	0	0	0	0.02314	-0.002692	0.018182	-0.002692	0	0
ENST00000253413	ATP6V1E1	P36543	ENSG00000131100	529	9	12	-2.66	-0.55	8	-2.66	-0.55	0	0	0	0.022181	-0.004917	0.014787	-0.004917	0	0
ENST00000253462	GINS2	Q9Y248	ENSG00000131153	51659	1	145	-26.07	-0.86	104	-26.07	-0.86	0	0	0	0.071889	-0.012925	0.051562	-0.012925	0	0
ENST00000253669	HAUS8	Q9BT25	ENSG00000131351	93323	1	10	-5.32	-0.72	9	-5.32	-0.72	0	0	0	0.068027	-0.036211	0.061224	-0.036211	0	0
ENST00000253692	TBC1D5	Q92609	ENSG00000131374	9779	1	35	-3.75	-0.38	22	-3.75	-0.38	0	0	0	0.009201	-0.000987	0.005783	-0.000987	0	0
ENST00000253861	EXOC4	Q96A65	ENSG00000131558	60412	9	7	-1	-0.18	7	-1	-0.18	0	0	0	0.005673	-0.000814	0.005673	-0.000814	0	0
ENST00000254029	WDR44	Q5JSH3	ENSG00000131725	54521	9	88	-21.71	-0.61	72	-21.71	-0.61	0	0	0	0.090072	-0.02222	0.073695	-0.02222	0	0
ENST00000254037	ZCCHC9	Q8N567	ENSG00000131732	84240	1	8	-2.58	-0.51	7	-2.58	-0.51	0	0	0	0.012539	-0.004047	0.010972	-0.004047	0	0
ENST00000254079	PPP1R1B	Q9UD71	ENSG00000131771	84152	7	18	-2.1	-0.21	14	-2.1	-0.21	0	0	0	0.02356	-0.00275	0.018325	-0.00275	0	0
ENST00000254190	CHSY1	Q86X52	ENSG00000131873	22856	6	214	-35.11	-0.66	147	-35.11	-0.66	0	0	0	0.128297	-0.02105	0.088129	-0.02105	0	0
ENST00000254260	RHPN2	Q8IUC4	ENSG00000131941	85415	1	61	-17.38	-0.84	59	-17.38	-0.84	0	0	0	0.043385	-0.012363	0.041963	-0.012363	0	0
ENST00000254286	ACTR10	Q9NZ32	ENSG00000131966	55860	9	47	-8.32	-0.47	35	-8.32	-0.47	0	0	0	0.043199	-0.007648	0.032169	-0.007648	0	0
ENST00000254322	DNAJB1	P25685	ENSG00000132002	3337	1	203	-35.79	-0.65	168	-35.79	-0.65	0	0	0	0.173061	-0.030509	0.143223	-0.030509	0	0
ENST00000254442	WDR7	Q9Y4E6	ENSG00000091157	23335	9	228	-16.59	-0.47	142	-16.59	-0.47	0	0	0	0.02425	-0.001764	0.015103	-0.001764	0	0
ENST00000254480	SMARCC1	Q92922	ENSG00000173473	6599	1	134	-15.65	-0.47	105	-15.65	-0.47	0	0	0	0.045578	-0.005324	0.035714	-0.005324	0	0
ENST00000254508	NUP210	Q8TEM1	ENSG00000132182	23225	1	53	-9.17	-0.86	39	-9.17	-0.86	0	0	0	0.036577	-0.006327	0.026915	-0.006327	0	0
ENST00000254584	ARFIP2	P53365	ENSG00000132254	23647	9	24	-8.37	-0.83	17	-8.37	-0.83	0	0	0	0.016713	-0.005828	0.011838	-0.005828	0	0
ENST00000254718	MYBBP1A	Q9BQG0	ENSG00000132382	10514	5	6	-0.77	-0.19	6	-0.77	-0.19	0	0	0	0.011628	-0.0015	0.011628	-0.0015	0	0
ENST00000254719	RPA1	P27694	ENSG00000132383	6117	1	30	-5.9	-0.49	26	-5.9	-0.49	0	0	0	0.012594	-0.002476	0.010915	-0.002476	0	0
ENST00000254759	COQ3	Q9NZJ6	ENSG00000132423	51805	9	4	-2.02	-0.53	4	-2.02	-0.53	0	0	0	0.019704	-0.009956	0.019704	-0.009956	0	0
ENST00000254770	LANCL2	Q9NS86	ENSG00000132434	55915	7	14	-3.55	-0.65	13	-3.55	-0.65	0	0	0	0.005773	-0.001462	0.005361	-0.001462	0	0
ENST00000254799	GRSF1	Q12849	ENSG00000132463	2926	1	194	-33.35	-0.72	133	-33.35	-0.72	0	0	0	0.03798	-0.006529	0.026038	-0.006529	0	0
ENST00000254806	WBP2	Q969T9	ENSG00000132471	23558	9	48	-14.54	-0.93	43	-14.54	-0.93	0	0	0	0.046243	-0.014011	0.041426	-0.014011	0	0
ENST00000254816	TRIM47	Q96LD4	ENSG00000132481	91107	2	2	-0.41	-0.21	2	-0.41	-0.21	0	0	0	0.006154	-0.001255	0.006154	-0.001255	0	0
ENST00000254878	RIDA	P52758	ENSG00000132541	10247	1	6	-4.07	-0.86	6	-4.07	-0.86	0	0	0	0.011976	-0.008128	0.011976	-0.008128	0	0
ENST00000254901	REEP2	Q9BRK0	ENSG00000132563	51308	8	47	-9.41	-0.95	36	-9.41	-0.95	0	0	0	0.038493	-0.007709	0.029484	-0.007709	0	0
ENST00000254942	TERF2	Q15554	ENSG00000132604	7014	9	139	-21.49	-0.63	103	-21.49	-0.63	0	0	0	0.103731	-0.016036	0.076866	-0.016036	0	0
ENST00000254976	SNAP25	P60880	ENSG00000132639	6616	9	327	-58.8	-0.92	221	-58.8	-0.92	0	0	0	0.267157	-0.048036	0.180556	-0.048036	0	0
ENST00000255194	AP3B1	O00203	ENSG00000132842	8546	1	66	-9.07	-0.55	49	-9.07	-0.55	0	0	0	0.027731	-0.003811	0.020588	-0.003811	0	0
ENST00000256001	ACTR3B	Q9P1U1	ENSG00000133627	57180	6	9	-3.02	-0.79	8	-3.02	-0.79	0	0	0	0.01087	-0.003647	0.009662	-0.003647	0	0
ENST00000256078	KRAS	P01116	ENSG00000133703	3845	7	391	-66.94	-1.31	249	-66.94	-1.31	0	0	0	0.80123	-0.137182	0.510246	-0.137182	0	0
ENST00000256079	IPO8	O15397	ENSG00000133704	10526	3	88	-13.49	-0.46	69	-13.49	-0.46	0	0	0	0.046933	-0.007194	0.0368	-0.007194	0	0
ENST00000256190	SBF2	Q86WG5	ENSG00000133812	81846	8	137	-21.7	-1.18	109	-21.7	-1.18	0	0	0	0.078107	-0.012373	0.062144	-0.012373	0	0
ENST00000256216	HSD17B4	P51659	ENSG00000133835	3295	1	3	-1.58	-0.57	3	-1.58	-0.57	0	0	0	0.008721	-0.00459	0.008721	-0.00459	0	0
ENST00000256319	ERG28	Q9UKR5	ENSG00000133935	11161	7	43	-10.18	-0.64	33	-10.18	-0.64	0	0	0	0.024335	-0.005763	0.018676	-0.005763	0	0
ENST00000256366	SYNJ2BP	P57105	ENSG00000213463	55333	5	102	-13.77	-0.88	45	-13.77	-0.88	0	0	0	0.015697	-0.002119	0.006925	-0.002119	0	0
ENST00000256367	TTC9	Q92623	ENSG00000133985	23508	9	181	-32.41	-0.83	127	-32.41	-0.83	0	0	0	0.043013	-0.007702	0.030181	-0.007702	0	0
ENST00000256413	CTIF	O43310	ENSG00000134030	9811	9	172	-18.37	-0.64	108	-18.37	-0.64	0	0	0	0.046982	-0.005018	0.0295	-0.005018	0	0
ENST00000256509	CHL1	O00533	ENSG00000134121	10752	9	155	-17.42	-0.74	112	-17.42	-0.74	0	0	0	0.04179	-0.004696	0.030197	-0.004696	0	0
ENST00000256637	SORT1	Q99523	ENSG00000134243	6272	8	203	-18.78	-0.44	122	-18.78	-0.44	0	0	0	0.045353	-0.004195	0.027256	-0.004195	0	0
ENST00000256646	NOTCH2	Q04721	ENSG00000134250	4853	1	122	-14.73	-0.92	84	-14.73	-0.92	0	0	0	0.032481	-0.003922	0.022364	-0.003922	0	0
ENST00000256707	KIDINS220	Q9ULH0	ENSG00000134313	57498	9	2	-0.04	-0.03	2	-0.04	-0.03	0	0	0	0.001072	-2.1e-05	0.001072	-2.1e-05	0	0
ENST00000257177	TUT4	Q5TAX3	ENSG00000134744	23318	4	157	-21.22	-0.9	120	-21.22	-0.9	0	0	0	0.236802	-0.032	0.180995	-0.032	0	0
ENST00000257209	FHOD3	Q2V2M9	ENSG00000134775	80206	3	18	-4.64	-0.43	18	-4.64	-0.43	0	0	0	0.034091	-0.008795	0.034091	-0.008795	0	0
ENST00000257245	TIMM10	P62072	ENSG00000134809	26519	6	38	-9.59	-0.96	24	-9.59	-0.96	0	0	0	0.14786	-0.037327	0.093385	-0.037327	0	0
ENST00000257261	FADS2	O95864	ENSG00000134824	9415	4	13	-2.72	-0.73	8	-2.72	-0.73	0	0	0	0.007794	-0.001633	0.004796	-0.001633	0	0
ENST00000257287	CEP135	Q66GS9	ENSG00000174799	9662	1	66	-13.98	-0.52	57	-13.98	-0.52	0	0	0	0.032706	-0.006926	0.028246	-0.006926	0	0
ENST00000257552	MSI1	O43347	ENSG00000135097	4440	1	153	-25.15	-0.75	130	-25.15	-0.75	0	0	0	0.085	-0.013974	0.072222	-0.013974	0	0
ENST00000257749	BACH2	Q9BYV9	ENSG00000112182	60468	7	539	-58.85	-0.8	365	-58.85	-0.8	0	0	0	0.091635	-0.010005	0.062054	-0.010005	0	0
ENST00000257915	TFCP2	Q12800	ENSG00000135457	7024	4	41	-10.5	-1.02	34	-10.5	-1.02	0	0	0	0.025933	-0.006644	0.021505	-0.006644	0	0
ENST00000258080	HTRA2	O43464	ENSG00000115317	27429	8	29	-7.04	-0.61	29	-7.04	-0.61	0	0	0	0.079235	-0.019238	0.079235	-0.019238	0	0
ENST00000258098	RAB11FIP5	Q9BXF6	ENSG00000135631	26056	6	73	-12.98	-0.44	51	-12.98	-0.44	0	0	0	0.03408	-0.006062	0.02381	-0.006062	0	0
ENST00000258106	EMX1	Q04741	ENSG00000135638	2016	3	58	-10.52	-0.56	42	-10.52	-0.56	0	0	0	0.061702	-0.01119	0.044681	-0.01119	0	0
ENST00000258187	NDRG4	Q9ULP0	ENSG00000103034	65009	7	84	-13.29	-0.46	72	-13.29	-0.46	0	0	0	0.040876	-0.006468	0.035036	-0.006468	0	0
ENST00000258198	DYNC1LI2	O43237	ENSG00000135720	1783	6	286	-51.16	-0.84	213	-51.16	-0.84	0	0	0	0.100989	-0.018065	0.075212	-0.018065	0	0
ENST00000258243	URB2	Q14146	ENSG00000135763	9816	3	10	-2.72	-0.64	7	-2.72	-0.64	0	0	0	0.01105	-0.003006	0.007735	-0.003006	0	0
ENST00000258301	STX6	O43752	ENSG00000135823	10228	9	148	-23.41	-0.68	101	-23.41	-0.68	0	0	0	0.038462	-0.006082	0.026247	-0.006082	0	0
ENST00000258418	CAB39	Q9Y376	ENSG00000135932	51719	9	125	-22.34	-0.64	110	-22.34	-0.64	0	0	0	0.052654	-0.009412	0.046335	-0.009412	0	0
ENST00000258526	PLXNC1	O60486	ENSG00000136040	10154	2	356	-34.89	-0.53	288	-34.89	-0.53	0	0	0	0.148767	-0.014581	0.120351	-0.014581	0	0
ENST00000258530	APPL2	Q8NEU8	ENSG00000136044	55198	2	47	-14.45	-0.73	41	-14.45	-0.73	0	0	0	0.046033	-0.014148	0.040157	-0.014148	0	0
ENST00000258648	MED4	Q9NPJ6	ENSG00000136146	29079	5	8	-3.24	-0.49	8	-3.24	-0.49	0	0	0	0.006745	-0.002732	0.006745	-0.002732	0	0
ENST00000258729	IGF2BP3	O00425	ENSG00000136231	10643	3	105	-21.26	-1.24	84	-21.26	-1.24	0	0	0	0.048701	-0.009859	0.038961	-0.009859	0	0
ENST00000258761	BZW2	Q9Y6E2	ENSG00000136261	28969	7	18	-6.78	-0.46	18	-6.78	-0.46	0	0	0	0.041096	-0.015473	0.041096	-0.015473	0	0
ENST00000258774	HUS1	O60921	ENSG00000136273	3364	5	1	-0.14	-0.14	1	-0.14	-0.14	0	0	0	0.000483	-7e-05	0.000483	-7e-05	0	0
ENST00000258821	TTC5	Q8N0Z6	ENSG00000136319	91875	7	30	-4.6	-0.74	21	-4.6	-0.74	0	0	0	0.008818	-0.001352	0.006173	-0.001352	0	0
ENST00000258886	IREB2	P48200	ENSG00000136381	3658	5	111	-16.06	-0.88	77	-16.06	-0.88	0	0	0	0.033474	-0.004845	0.023221	-0.004845	0	0
ENST00000258991	TEX2	Q8IWB9	ENSG00000136478	55852	9	116	-20.11	-0.58	85	-20.11	-0.58	0	0	0	0.066476	-0.011524	0.048711	-0.011524	0	0
ENST00000259021	KAT7	O95251	ENSG00000136504	11143	2	381	-40.28	-0.68	218	-40.28	-0.68	0	0	0	0.050591	-0.005348	0.028947	-0.005348	0	0
ENST00000259339	TOR1B	O14657	ENSG00000136816	27348	5	124	-22.08	-0.89	78	-22.08	-0.89	0	0	0	0.072898	-0.012979	0.045855	-0.012979	0	0
ENST00000259512	DERL1	Q9BUN8	ENSG00000136986	79139	9	21	-4.81	-0.54	19	-4.81	-0.54	0	0	0	0.009186	-0.002102	0.008311	-0.002102	0	0
ENST00000259569	RANBP6	O60518	ENSG00000137040	26953	9	53	-7.64	-0.5	33	-7.64	-0.5	0	0	0	0.0424	-0.006115	0.0264	-0.006115	0	0
ENST00000259746	TMEM63B	Q5T3F8	ENSG00000137216	55362	9	40	-10.77	-0.63	40	-10.77	-0.63	0	0	0	0.062598	-0.01685	0.062598	-0.01685	0	0
ENST00000259750	TTBK1	Q5TCY1	ENSG00000146216	84630	8	46	-3.61	-0.45	32	-3.61	-0.45	0	0	0	0.015939	-0.001251	0.011088	-0.001251	0	0
ENST00000259818	TUBB2B	Q9BVA1	ENSG00000137285	347733	9	8	-2.52	-0.51	8	-2.52	-0.51	0	0	0	0.016227	-0.00512	0.016227	-0.00512	0	0
ENST00000260008	FHDC1	Q9C0D6	ENSG00000137460	85462	8	68	-10.98	-0.68	48	-10.98	-0.68	0	0	0	0.022849	-0.003689	0.016129	-0.003689	0	0
ENST00000260045	THAP12	O43422	ENSG00000137492	5612	6	33	-8.5	-0.55	31	-8.5	-0.55	0	0	0	0.036224	-0.009326	0.034029	-0.009326	0	0
ENST00000260116	TTPA	P49638	ENSG00000137561	7274	1	80	-13.54	-0.73	51	-13.54	-0.73	0	0	0	0.054348	-0.0092	0.034647	-0.0092	0	0
ENST00000260130	SDCBP	O00560	ENSG00000137575	6386	2	45	-14.17	-0.55	45	-14.17	-0.55	0	0	0	0.040071	-0.012622	0.040071	-0.012622	0	0
ENST00000260197	SORL1	Q92673	ENSG00000137642	6653	9	280	-28.38	-1.37	195	-28.38	-1.37	0	0	0	0.067747	-0.006867	0.047181	-0.006867	0	0
ENST00000260270	FDX1	P10109	ENSG00000137714	2230	1	33	-6.82	-0.95	16	-6.82	-0.95	0	0	0	0.013659	-0.002822	0.006623	-0.002822	0	0
ENST00000260356	THBS1	P07996	ENSG00000137801	7057	6	241	-32.4	-0.71	173	-32.4	-0.71	0	0	0	0.05878	-0.007901	0.042195	-0.007901	0	0
ENST00000260379	RPLP1	P05386	ENSG00000137818	6176	3	1	-0.18	-0.18	1	-0.18	-0.18	0	0	0	0.001449	-0.000264	0.001449	-0.000264	0	0
ENST00000260385	RMDN3	Q96TC7	ENSG00000137824	55177	6	16	-3.13	-0.54	13	-3.13	-0.54	0	0	0	0.024242	-0.004739	0.019697	-0.004739	0	0
ENST00000260585	SELENOI	Q9C0D9	ENSG00000138018	85465	7	276	-34.39	-0.78	138	-34.39	-0.78	0	0	0	0.040642	-0.005064	0.020321	-0.005064	0	0
ENST00000260641	ACTR2	P61160	ENSG00000138071	10097	9	44	-9.13	-0.65	25	-9.13	-0.65	0	0	0	0.017446	-0.003621	0.009913	-0.003621	0	0
ENST00000260643	PREB	Q9HCU5	ENSG00000138073	10113	9	15	-4.36	-0.69	10	-4.36	-0.69	0	0	0	0.022693	-0.00659	0.015129	-0.00659	0	0
ENST00000260731	KIF11	P52732	ENSG00000138160	3832	1	20	-2.52	-0.47	17	-2.52	-0.47	0	0	0	0.012484	-0.001572	0.010612	-0.001572	0	0
ENST00000260746	ARL3	P36405	ENSG00000138175	403	7	94	-18.77	-0.91	67	-18.77	-0.91	0	0	0	0.02969	-0.005928	0.021162	-0.005928	0	0
ENST00000260777	SHTN1	A0MZ66	ENSG00000187164	57698	9	108	-12.26	-0.48	70	-12.26	-0.48	0	0	0	0.036364	-0.004129	0.023569	-0.004129	0	0
ENST00000260810	TOPBP1	Q92547	ENSG00000163781	11073	1	31	-5.08	-0.61	26	-5.08	-0.61	0	0	0	0.045588	-0.007466	0.038235	-0.007466	0	0
ENST00000260818	DNAJC13	O75165	ENSG00000138246	23317	5	115	-26.39	-0.54	109	-26.39	-0.54	0	0	0	0.152722	-0.035052	0.144754	-0.035052	0	0
ENST00000260970	PPIG	Q13427	ENSG00000138398	9360	3	97	-15.1	-0.51	73	-15.1	-0.51	0	0	0	0.024961	-0.003887	0.018785	-0.003887	0	0
ENST00000261023	ITGAV	P06756	ENSG00000138448	3685	2	59	-9.38	-0.52	30	-9.38	-0.52	0	0	0	0.016334	-0.002596	0.008306	-0.002596	0	0
ENST00000261173	ATP2B1	P20020	ENSG00000070961	490	7	175	-22.02	-0.41	124	-22.02	-0.41	0	0	0	0.059605	-0.0075	0.042234	-0.0075	0	0
ENST00000261182	NAP1L1	P55209	ENSG00000187109	4673	1	200	-43.39	-1.01	143	-43.39	-1.01	0	0	0	0.070028	-0.015191	0.05007	-0.015191	0	0
ENST00000261192	BCAT1	P54687	ENSG00000060982	586	4	225	-25.8	-0.73	103	-25.8	-0.73	0	0	0	0.028164	-0.003229	0.012893	-0.003229	0	0
ENST00000261250	C12orf4	Q9NQ89	ENSG00000047621	57102	8	39	-5.77	-0.71	25	-5.77	-0.71	0	0	0	0.018732	-0.002771	0.012008	-0.002771	0	0
ENST00000261304	GALC	P54803	ENSG00000054983	2581	7	20	-6.03	-0.43	18	-6.03	-0.43	0	0	0	0.011621	-0.003506	0.010459	-0.003506	0	0
ENST00000261308	PPWD1	Q96BP3	ENSG00000113593	23398	2	20	-4.65	-0.62	17	-4.65	-0.62	0	0	0	0.128205	-0.029814	0.108974	-0.029814	0	0
ENST00000261313	PEBP1	P30086	ENSG00000089220	5037	9	5	-1.03	-0.29	5	-1.03	-0.29	0	0	0	0.006378	-0.001318	0.006378	-0.001318	0	0
ENST00000261368	SNCAIP	Q9Y6H5	ENSG00000064692	9627	2	34	-12.77	-0.68	32	-12.77	-0.68	0	0	0	0.046832	-0.017587	0.044077	-0.017587	0	0
ENST00000261401	CORO1C	Q9ULV4	ENSG00000110880	23603	6	231	-43.27	-1.2	162	-43.27	-1.2	0	0	0	0.100566	-0.018839	0.070527	-0.018839	0	0
ENST00000261427	UBE2K	P61086	ENSG00000078140	3093	9	329	-59.76	-0.86	202	-59.76	-0.86	0	0	0	0.075441	-0.013704	0.04632	-0.013704	0	0
ENST00000261439	TBC1D1	Q86TI0	ENSG00000065882	23216	1	89	-12.5	-0.65	54	-12.5	-0.65	0	0	0	0.048343	-0.006789	0.029332	-0.006789	0	0
ENST00000261461	PPP2R5A	Q15172	ENSG00000066027	5525	3	39	-10.76	-0.55	38	-10.76	-0.55	0	0	0	0.035584	-0.009815	0.034672	-0.009815	0	0
ENST00000261488	ENOX1	Q8TC92	ENSG00000120658	55068	9	35	-8.43	-0.49	29	-8.43	-0.49	0	0	0	0.073684	-0.017745	0.061053	-0.017745	0	0
ENST00000261497	USP22	Q9UPT9	ENSG00000124422	23326	8	19	-3.13	-0.37	13	-3.13	-0.37	0	0	0	0.005522	-0.000909	0.003778	-0.000909	0	0
ENST00000261507	MSMO1	Q15800	ENSG00000052802	6307	4	31	-9.86	-0.7	30	-9.86	-0.7	0	0	0	0.025472	-0.008099	0.024651	-0.008099	0	0
ENST00000261509	PALLD	Q8WX93	ENSG00000129116	23022	1	89	-16.01	-0.88	62	-16.01	-0.88	0	0	0	0.039035	-0.007021	0.027193	-0.007021	0	0
ENST00000261537	MIB1	Q86YT6	ENSG00000101752	57534	3	223	-27.18	-0.6	138	-27.18	-0.6	0	0	0	0.035431	-0.004319	0.021926	-0.004319	0	0
ENST00000261574	IPO5	O00410	ENSG00000065150	3843	1	177	-19.74	-0.62	129	-19.74	-0.62	0	0	0	0.071429	-0.007965	0.052058	-0.007965	0	0
ENST00000261592	NOL4	O94818	ENSG00000101746	8715	9	186	-35.56	-0.62	157	-35.56	-0.62	0	0	0	0.10659	-0.020377	0.089971	-0.020377	0	0
ENST00000261596	LPIN2	Q92539	ENSG00000101577	9663	9	67	-7.09	-0.48	51	-7.09	-0.48	0	0	0	0.020291	-0.002146	0.015445	-0.002146	0	0
ENST00000261600	THOC1	Q96FV9	ENSG00000079134	9984	5	47	-7.74	-0.5	32	-7.74	-0.5	0	0	0	0.435185	-0.071648	0.296296	-0.071648	0	0
ENST00000261636	ARL1	P40616	ENSG00000120805	400	1	48	-14.75	-0.79	34	-14.75	-0.79	0	0	0	0.019025	-0.005845	0.013476	-0.005845	0	0
ENST00000261647	TTC19	Q6DKK2	ENSG00000011295	54902	7	22	-6.31	-1.05	16	-6.31	-1.05	0	0	0	0.015793	-0.004533	0.011486	-0.004533	0	0
ENST00000261681	MPP5	Q8N3R9	ENSG00000072415	64398	1	134	-22.21	-0.68	95	-22.21	-0.68	0	0	0	0.046755	-0.007751	0.033147	-0.007751	0	0
ENST00000261692	CDK2AP1	O14519	ENSG00000111328	8099	3	1	-0.25	-0.25	1	-0.25	-0.25	0	0	0	0.001319	-0.000328	0.001319	-0.000328	0	0
ENST00000261716	TAOK1	Q7L7X3	ENSG00000160551	57551	9	975	-78.35	-0.83	526	-78.35	-0.83	0	0	0	0.109736	-0.008818	0.059201	-0.008818	0	0
ENST00000261726	CUX2	O14529	ENSG00000111249	23316	6	138	-17.03	-0.54	107	-17.03	-0.54	0	0	0	0.061828	-0.007628	0.047939	-0.007628	0	0
ENST00000261733	ALDH2	P05091	ENSG00000111275	217	6	4	-0.41	-0.11	4	-0.41	-0.11	0	0	0	0.000503	-5.2e-05	0.000503	-5.2e-05	0	0
ENST00000261745	NAA25	Q14CX7	ENSG00000111300	80018	5	118	-20.18	-0.8	96	-20.18	-0.8	0	0	0	0.041476	-0.007091	0.033743	-0.007091	0	0
ENST00000261783	ARG2	P78540	ENSG00000081181	384	7	24	-8.13	-0.62	22	-8.13	-0.62	0	0	0	0.029888	-0.010131	0.027397	-0.010131	0	0
ENST00000261861	CORO2B	Q9UQ03	ENSG00000103647	10391	8	108	-18.59	-0.83	77	-18.59	-0.83	0	0	0	0.058856	-0.010134	0.041962	-0.010134	0	0
ENST00000261875	HACD3	Q9P035	ENSG00000074696	51495	4	49	-12.05	-1.11	40	-12.05	-1.11	0	0	0	0.024798	-0.006099	0.020243	-0.006099	0	0
ENST00000261880	AAGAB	Q6PD74	ENSG00000103591	79719	4	18	-5.13	-1.3	12	-5.13	-1.3	0	0	0	0.01005	-0.002864	0.0067	-0.002864	0	0
ENST00000261897	PRPF40B	Q6NWY9	ENSG00000110844	25766	9	6	-0.15	-0.06	6	-0.15	-0.06	0	0	0	0.012579	-0.000319	0.012579	-0.000319	0	0
ENST00000261908	NEO1	Q92859	ENSG00000067141	4756	7	106	-11.71	-0.73	84	-11.71	-0.73	0	0	0	0.042181	-0.00466	0.033426	-0.00466	0	0
ENST00000261965	TUBGCP3	Q96CW5	ENSG00000126216	10426	1	19	-5.26	-0.47	17	-5.26	-0.47	0	0	0	0.019173	-0.005313	0.017154	-0.005313	0	0
ENST00000262013	SPAG9	O60271	ENSG00000008294	9043	6	178	-16.85	-0.47	117	-16.85	-0.47	0	0	0	0.043404	-0.004109	0.02853	-0.004109	0	0
ENST00000262030	ATP5F1B	P06576	ENSG00000110955	506	7	2	-0.55	-0.28	2	-0.55	-0.28	0	0	0	0.013605	-0.003769	0.013605	-0.003769	0	0
ENST00000262043	PHF3	Q92576	ENSG00000118482	23469	5	132	-29.09	-0.66	111	-29.09	-0.66	0	0	0	0.074324	-0.016379	0.0625	-0.016379	0	0
ENST00000262056	EIF4B	P23588	ENSG00000063046	1975	5	116	-17.79	-0.81	95	-17.79	-0.81	0	0	0	0.058321	-0.008944	0.047763	-0.008944	0	0
ENST00000262067	TSPAN13	O95857	ENSG00000106537	27075	9	6	-0.97	-0.33	5	-0.97	-0.33	0	0	0	0.005725	-0.000927	0.004771	-0.000927	0	0
ENST00000262077	NUP153	P49790	ENSG00000124789	9972	1	99	-22.04	-0.55	95	-22.04	-0.55	0	0	0	0.09322	-0.020754	0.089454	-0.020754	0	0
ENST00000262097	ASAH1	Q13510	ENSG00000104763	427	9	13	-3.28	-0.58	11	-3.28	-0.58	0	0	0	0.011597	-0.002922	0.009813	-0.002922	0	0
ENST00000262120	TWSG1	Q9GZX9	ENSG00000128791	57045	1	18	-4.12	-0.71	14	-4.12	-0.71	0	0	0	0.006215	-0.001421	0.004834	-0.001421	0	0
ENST00000262189	KMT2C	Q8NEZ4	ENSG00000055609	58508	2	209	-22.93	-0.35	189	-22.93	-0.35	0	0	0	0.109424	-0.012005	0.098953	-0.012005	0	0
ENST00000262198	ADNP2	Q6IQ32	ENSG00000101544	22850	4	16	-4.27	-0.36	15	-4.27	-0.36	0	0	0	0.010356	-0.002764	0.009709	-0.002764	0	0
ENST00000262233	EML1	O00423	ENSG00000066629	2009	7	65	-13.3	-0.5	45	-13.3	-0.5	0	0	0	0.033316	-0.006815	0.023065	-0.006815	0	0
ENST00000262241	RCOR1	Q9UKL0	ENSG00000089902	23186	6	329	-49.92	-0.65	244	-49.92	-0.65	0	0	0	0.080776	-0.012256	0.059907	-0.012256	0	0
ENST00000262319	TELO2	Q9Y4R8	ENSG00000100726	9894	5	3	-0.36	-0.15	3	-0.36	-0.15	0	0	0	0.005725	-0.000691	0.005725	-0.000691	0	0
ENST00000262367	CREBBP	Q92793	ENSG00000005339	1387	5	159	-8.37	-0.45	132	-8.37	-0.45	0	0	0	0.059618	-0.003139	0.049494	-0.003139	0	0
ENST00000262428	COTL1	Q14019	ENSG00000103187	23406	9	35	-10.85	-0.71	31	-10.85	-0.71	0	0	0	0.027911	-0.00865	0.024721	-0.00865	0	0
ENST00000262430	MLYCD	O95822	ENSG00000103150	23417	9	7	-1.63	-0.47	7	-1.63	-0.47	0	0	0	0.000607	-0.000141	0.000607	-0.000141	0	0
ENST00000262493	GNAO1	P09471	ENSG00000087258	2775	9	72	-19.94	-0.81	68	-19.94	-0.81	0	0	0	0.051948	-0.014385	0.049062	-0.014385	0	0
ENST00000262554	SPTLC1	O15269	ENSG00000090054	10558	1	34	-8.86	-0.44	29	-8.86	-0.44	0	0	0	0.072495	-0.018896	0.061834	-0.018896	0	0
ENST00000262605	TTPAL	Q9BTX7	ENSG00000124120	79183	5	81	-13.83	-0.66	55	-13.83	-0.66	0	0	0	0.015992	-0.00273	0.010859	-0.00273	0	0
ENST00000262613	SLC9A3R1	O14745	ENSG00000109062	9368	1	17	-5.74	-0.77	14	-5.74	-0.77	0	0	0	0.024286	-0.008204	0.02	-0.008204	0	0
ENST00000262646	RAB2A	P61019	ENSG00000104388	5862	9	217	-48.29	-1.1	148	-48.29	-1.1	0	0	0	0.075848	-0.01688	0.05173	-0.01688	0	0
ENST00000262662	CDKN2C	P42773	ENSG00000123080	1031	1	25	-5.47	-0.48	21	-5.47	-0.48	0	0	0	0.068306	-0.014945	0.057377	-0.014945	0	0
ENST00000262848	PRKX	P51817	ENSG00000183943	5613	8	77	-13.99	-0.91	49	-13.99	-0.91	0	0	0	0.016732	-0.00304	0.010648	-0.00304	0	0
ENST00000262878	SAMHD1	Q9Y3Z3	ENSG00000101347	25939	7	16	-2.16	-0.6	7	-2.16	-0.6	0	0	0	0.006777	-0.000913	0.002965	-0.000913	0	0
ENST00000262942	ARPC1A	Q92747	ENSG00000241685	10552	8	18	-5.15	-0.34	18	-5.15	-0.34	0	0	0	0.054381	-0.015571	0.054381	-0.015571	0	0
ENST00000262965	TCF3	P15923	ENSG00000071564	6929	1	61	-18.36	-0.83	53	-18.36	-0.83	0	0	0	0.025207	-0.007588	0.021901	-0.007588	0	0
ENST00000262982	CSE1L	P55060	ENSG00000124207	1434	4	72	-11.8	-0.51	54	-11.8	-0.51	0	0	0	0.139265	-0.022826	0.104449	-0.022826	0	0
ENST00000262995	GAB1	Q13480	ENSG00000109458	2549	1	358	-47.73	-1.02	222	-47.73	-1.02	0	0	0	0.066518	-0.008868	0.041249	-0.008868	0	0
ENST00000263035	DHTKD1	Q96HY7	ENSG00000181192	55526	1	15	-2.91	-0.47	12	-2.91	-0.47	0	0	0	0.00641	-0.001244	0.005128	-0.001244	0	0
ENST00000263092	METTL16	Q86W50	ENSG00000127804	79066	1	39	-1.49	-0.23	19	-1.49	-0.23	0	0	0	0.010008	-0.000383	0.004876	-0.000383	0	0
ENST00000263097	CNN2	Q99439	ENSG00000064666	1265	5	31	-10.98	-0.98	24	-10.98	-0.98	0	0	0	0.026473	-0.009376	0.020495	-0.009376	0	0
ENST00000263102	CCDC6	Q16204	ENSG00000108091	8030	5	260	-49.43	-0.86	202	-49.43	-0.86	0	0	0	0.062545	-0.011891	0.048593	-0.011891	0	0
ENST00000263207	ARVCF	O00192	ENSG00000099889	421	2	13	-3.33	-0.39	13	-3.33	-0.39	0	0	0	0.015064	-0.003864	0.015064	-0.003864	0	0
ENST00000263233	SYP	P08247	ENSG00000102003	6855	9	41	-4.68	-1.1	21	-4.68	-1.1	0	0	0	0.027591	-0.003146	0.014132	-0.003146	0	0
ENST00000263238	ACTR3	P61158	ENSG00000115091	10096	9	213	-24.15	-0.88	135	-24.15	-0.88	0	0	0	0.041407	-0.004696	0.026244	-0.004696	0	0
ENST00000263239	DDX18	Q9NVP1	ENSG00000088205	8886	5	10	-2.48	-0.37	8	-2.48	-0.37	0	0	0	0.006031	-0.001496	0.004825	-0.001496	0	0
ENST00000263246	PACSIN2	Q9UNF0	ENSG00000100266	11252	1	8	-1.29	-0.27	8	-1.29	-0.27	0	0	0	0.005035	-0.000811	0.005035	-0.000811	0	0
ENST00000263256	DESI1	Q6ICB0	ENSG00000100418	27351	7	199	-41.21	-1.3	144	-41.21	-1.3	0	0	0	0.064779	-0.013415	0.046875	-0.013415	0	0
ENST00000263257	NOVA2	Q9UNW9	ENSG00000104967	4858	9	414	-38.76	-1.73	275	-38.76	-1.73	0	0	0	0.067515	-0.00632	0.044847	-0.00632	0	0
ENST00000263274	LIG1	P18858	ENSG00000105486	3978	1	2	-0.68	-0.35	2	-0.68	-0.35	0	0	0	0.009662	-0.00328	0.009662	-0.00328	0	0
ENST00000263280	STRN4	Q9NRL3	ENSG00000090372	29888	9	30	-5.12	-0.34	30	-5.12	-0.34	0	0	0	0.033296	-0.005683	0.033296	-0.005683	0	0
ENST00000263354	NAPA	P54920	ENSG00000105402	8775	9	6	-0.74	-0.25	3	-0.74	-0.25	0	0	0	0.009174	-0.001135	0.004587	-0.001135	0	0
ENST00000263377	BRD4	O60885	ENSG00000141867	23476	1	177	-13.98	-0.36	130	-13.98	-0.36	0	0	0	0.061866	-0.004887	0.045439	-0.004887	0	0
ENST00000263384	FAM32A	Q9Y421	ENSG00000105058	26017	6	2	-0.72	-0.54	2	-0.72	-0.54	0	0	0	0.001828	-0.000654	0.001828	-0.000654	0	0
ENST00000263461	WDR11	Q9BZH6	ENSG00000120008	55717	5	5	-0.37	-0.15	5	-0.37	-0.15	0	0	0	0.006143	-0.000451	0.006143	-0.000451	0	0
ENST00000263563	PALD1	Q9ULE6	ENSG00000107719	27143	1	92	-14.28	-0.66	65	-14.28	-0.66	0	0	0	0.053519	-0.008308	0.037813	-0.008308	0	0
ENST00000263578	FOXRED1	Q96CU9	ENSG00000110074	55572	8	2	-0.6	-0.33	2	-0.6	-0.33	0	0	0	0.004566	-0.001361	0.004566	-0.001361	0	0
ENST00000263593	SIAE	Q9HAT2	ENSG00000110013	54414	8	23	-3.22	-0.24	19	-3.22	-0.24	0	0	0	0.005988	-0.000839	0.004947	-0.000839	0	0
ENST00000263635	TANC1	Q9C0D5	ENSG00000115183	85461	2	127	-14.52	-0.46	93	-14.52	-0.46	0	0	0	0.07697	-0.008801	0.056364	-0.008801	0	0
ENST00000263645	CD81	P60033	ENSG00000110651	975	3	6	-1.84	-0.43	6	-1.84	-0.43	0	0	0	0.010791	-0.003311	0.010791	-0.003311	0	0
ENST00000263672	SPCS2	Q15005	ENSG00000118363	9789	3	79	-13.94	-0.77	68	-13.94	-0.77	0	0	0	0.039679	-0.007001	0.034154	-0.007001	0	0
ENST00000263681	POLD3	Q15054	ENSG00000077514	10714	1	13	-4.33	-0.68	8	-4.33	-0.68	0	0	0	0.005667	-0.001889	0.003487	-0.001889	0	0
ENST00000263733	FAM20B	O75063	ENSG00000116199	9917	9	92	-11.54	-0.44	52	-11.54	-0.44	0	0	0	0.02081	-0.00261	0.011762	-0.00261	0	0
ENST00000263736	SRBD1	Q8N5C6	ENSG00000068784	55133	1	2	-0.04	-0.03	2	-0.04	-0.03	0	0	0	0.00316	-5.7e-05	0.00316	-5.7e-05	0	0
ENST00000263780	CHMP2B	Q9UQN3	ENSG00000083937	25978	5	61	-15.15	-0.69	47	-15.15	-0.69	0	0	0	0.03631	-0.00902	0.027976	-0.00902	0	0
ENST00000263795	WDR76	Q9H967	ENSG00000092470	79968	1	20	-6.48	-0.63	16	-6.48	-0.63	0	0	0	0.009852	-0.003194	0.007882	-0.003194	0	0
ENST00000263801	TP53BP1	Q12888	ENSG00000067369	7158	7	5	-1.39	-0.29	5	-1.39	-0.29	0	0	0	0.028249	-0.007859	0.028249	-0.007859	0	0
ENST00000263847	OSBP	P22059	ENSG00000110048	5007	6	108	-13.85	-0.56	104	-13.85	-0.56	0	0	0	0.049496	-0.006349	0.047663	-0.006349	0	0
ENST00000263849	ZC2HC1A	Q96GY0	ENSG00000104427	51101	8	58	-14.48	-0.64	44	-14.48	-0.64	0	0	0	0.025495	-0.006364	0.019341	-0.006364	0	0
ENST00000263856	CHMP3	Q9Y3E7	ENSG00000115561	51652	5	44	-11.21	-0.72	32	-11.21	-0.72	0	0	0	0.018519	-0.004719	0.013468	-0.004719	0	0
ENST00000263867	CAPG	P40121	ENSG00000042493	822	1	4	-0.93	-0.31	4	-0.93	-0.31	0	0	0	0.027027	-0.00627	0.027027	-0.00627	0	0
ENST00000263904	STAM2	O75886	ENSG00000115145	10254	8	64	-16.72	-0.71	56	-16.72	-0.71	0	0	0	0.016949	-0.004427	0.014831	-0.004427	0	0
ENST00000263966	USP13	Q92995	ENSG00000058056	8975	2	209	-25.18	-0.81	118	-25.18	-0.81	0	0	0	0.039711	-0.004785	0.022421	-0.004785	0	0
ENST00000263967	PIK3CA	P42336	ENSG00000121879	5290	8	360	-40.26	-0.62	209	-40.26	-0.62	0	0	0	0.062805	-0.007023	0.036462	-0.007023	0	0
ENST00000264025	NECTIN1	Q15223	ENSG00000110400	5818	7	234	-26.28	-1.24	161	-26.28	-1.24	0	0	0	0.062267	-0.006993	0.042842	-0.006993	0	0
ENST00000264027	SC5D	O75845	ENSG00000109929	6309	7	55	-11.01	-0.73	38	-11.01	-0.73	0	0	0	0.046414	-0.009291	0.032068	-0.009291	0	0
ENST00000264039	GPC1	P35052	ENSG00000063660	2817	1	45	-7.54	-0.49	33	-7.54	-0.49	0	0	0	0.025126	-0.00421	0.018425	-0.00421	0	0
ENST00000264059	EFHD1	Q9BUP0	ENSG00000115468	80303	1	3	-1.33	-0.57	3	-1.33	-0.57	0	0	0	0.002817	-0.001252	0.002817	-0.001252	0	0
ENST00000264065	DNAJC10	Q8IXB1	ENSG00000077232	54431	3	136	-10.52	-0.71	48	-10.52	-0.71	0	0	0	0.007845	-0.000607	0.002769	-0.000607	0	0
ENST00000264122	CBLB	Q13191	ENSG00000114423	868	8	164	-30.14	-0.77	118	-30.14	-0.77	0	0	0	0.046697	-0.008581	0.033599	-0.008581	0	0
ENST00000264167	AGPS	O00116	ENSG00000018510	8540	4	312	-29.36	-0.73	150	-29.36	-0.73	0	0	0	0.05528	-0.005201	0.026577	-0.005201	0	0
ENST00000264220	PPAT	Q06203	ENSG00000128059	5471	3	24	-6.6	-0.51	22	-6.6	-0.51	0	0	0	0.012042	-0.003313	0.011039	-0.003313	0	0
ENST00000264235	GSK3B	P49841	ENSG00000082701	2932	9	324	-35.09	-0.5	210	-35.09	-0.5	0	0	0	0.059254	-0.006416	0.038405	-0.006416	0	0
ENST00000264424	GUCY1B1	Q02153	ENSG00000061918	2983	7	24	-4.13	-0.43	22	-4.13	-0.43	0	0	0	0.020253	-0.003488	0.018565	-0.003488	0	0
ENST00000264431	RAPGEF2	Q9Y4G8	ENSG00000109756	9693	9	267	-33.46	-0.43	236	-33.46	-0.43	0	0	0	0.131333	-0.016459	0.116085	-0.016459	0	0
ENST00000264433	FNIP2	Q9P278	ENSG00000052795	57600	7	234	-28.34	-0.65	166	-28.34	-0.65	0	0	0	0.066705	-0.00808	0.04732	-0.00808	0	0
ENST00000264436	ADD2	P35612	ENSG00000075340	119	9	190	-20.61	-1.06	98	-20.61	-1.06	0	0	0	0.028597	-0.003102	0.01475	-0.003102	0	0
ENST00000264451	SLC30A9	Q6PML9	ENSG00000014824	10463	9	93	-18.03	-0.65	70	-18.03	-0.65	0	0	0	0.021458	-0.00416	0.016151	-0.00416	0	0
ENST00000264498	FGF2	P09038	ENSG00000138685	2247	1	211	-35.38	-1.61	124	-35.38	-1.61	0	0	0	0.036112	-0.006055	0.021222	-0.006055	0	0
ENST00000264595	AGA	P20933	ENSG00000038002	175	6	1	-0.64	-0.64	1	-0.64	-0.64	0	0	0	0.001063	-0.000675	0.001063	-0.000675	0	0
ENST00000264645	CASC3	O15234	ENSG00000108349	22794	5	92	-18.97	-1.11	70	-18.97	-1.11	0	0	0	0.051656	-0.010649	0.039304	-0.010649	0	0
ENST00000264663	NNT	Q13423	ENSG00000112992	23530	9	45	-11.31	-0.61	36	-11.31	-0.61	0	0	0	0.01498	-0.003766	0.011984	-0.003766	0	0
ENST00000264670	NSUN2	Q08J23	ENSG00000037474	54888	6	7	-2.26	-0.37	7	-2.26	-0.37	0	0	0	0.010145	-0.003281	0.010145	-0.003281	0	0
ENST00000264689	UFSP2	Q9NUQ7	ENSG00000109775	55325	1	10	-4.28	-1.07	9	-4.28	-1.07	0	0	0	0.09434	-0.040377	0.084906	-0.040377	0	0
ENST00000264705	CAD	P27708	ENSG00000084774	790	1	41	-3.22	-0.47	27	-3.22	-0.47	0	0	0	0.095794	-0.007519	0.063084	-0.007519	0	0
ENST00000264710	RAB10	P61026	ENSG00000084733	10890	8	335	-67.37	-0.89	239	-67.37	-0.89	0	0	0	0.137521	-0.027658	0.098112	-0.027658	0	0
ENST00000264883	NUP54	Q7Z3B4	ENSG00000138750	53371	5	5	-1.83	-0.68	4	-1.83	-0.68	0	0	0	0.007092	-0.002597	0.005674	-0.002597	0	0
ENST00000264896	SCARB2	Q14108	ENSG00000138760	950	8	63	-10.58	-0.39	46	-10.58	-0.39	0	0	0	0.02112	-0.003548	0.015421	-0.003548	0	0
ENST00000264977	PPP2R3A	Q06190	ENSG00000073711	5523	5	11	-3.07	-0.59	7	-3.07	-0.59	0	0	0	0.004032	-0.001125	0.002566	-0.001125	0	0
ENST00000265000	GALNT7	Q86SF2	ENSG00000109586	51809	1	183	-38.36	-0.73	146	-38.36	-0.73	0	0	0	0.081225	-0.017028	0.064802	-0.017028	0	0
ENST00000265062	RAB7A	P51149	ENSG00000075785	7879	9	44	-11.72	-0.54	41	-11.72	-0.54	0	0	0	0.031954	-0.008508	0.029775	-0.008508	0	0
ENST00000265070	GOLPH3	Q9H4A6	ENSG00000113384	64083	9	52	-9.43	-0.47	39	-9.43	-0.47	0	0	0	0.034414	-0.006242	0.025811	-0.006242	0	0
ENST00000265073	SUB1	P53999	ENSG00000113387	10923	6	110	-25.26	-0.94	77	-25.26	-0.94	0	0	0	0.036691	-0.008425	0.025684	-0.008425	0	0
ENST00000265074	NPR3	P17342	ENSG00000113389	4883	9	132	-13.11	-0.64	79	-13.11	-0.64	0	0	0	0.024544	-0.002439	0.014689	-0.002439	0	0
ENST00000265077	VCAN	P13611	ENSG00000038427	1462	6	322	-29.01	-0.63	207	-29.01	-0.63	0	0	0	0.172009	-0.015498	0.110577	-0.015498	0	0
ENST00000265085	CPEB4	Q17RY0	ENSG00000113742	80315	9	623	-63.43	-0.65	428	-63.43	-0.65	0	0	0	0.106642	-0.010857	0.073263	-0.010857	0	0
ENST00000265097	THOC3	Q96J01	ENSG00000051596	84321	4	1	-0.09	-0.09	1	-0.09	-0.09	0	0	0	0.002247	-0.000211	0.002247	-0.000211	0	0
ENST00000265104	DNAH5	Q8TE73	ENSG00000039139	1767	9	6	-0.75	-0.24	5	-0.75	-0.24	0	0	0	0.003623	-0.000454	0.003019	-0.000454	0	0
ENST00000265109	RAI14	Q9P0K7	ENSG00000039560	26064	3	117	-20.98	-0.6	97	-20.98	-0.6	0	0	0	0.062735	-0.01125	0.052011	-0.01125	0	0
ENST00000265113	SLC1A3	P43003	ENSG00000079215	6507	1	40	-6.37	-0.56	32	-6.37	-0.56	0	0	0	0.019342	-0.003079	0.015474	-0.003079	0	0
ENST00000265174	PAPSS1	O43252	ENSG00000138801	9061	9	9	-2.94	-0.47	8	-2.94	-0.47	0	0	0	0.015358	-0.00501	0.013652	-0.00501	0	0
ENST00000265271	RBM27	Q9P2N5	ENSG00000091009	54439	1	241	-20.2	-0.35	148	-20.2	-0.35	0	0	0	0.077617	-0.006506	0.047665	-0.006506	0	0
ENST00000265295	SPDL1	Q96EA4	ENSG00000040275	54908	1	5	-1.34	-0.43	4	-1.34	-0.43	0	0	0	0.008711	-0.002329	0.006969	-0.002329	0	0
ENST00000265316	ABCB6	Q9NP58	ENSG00000115657	10058	5	6	-2.99	-0.56	6	-2.99	-0.56	0	0	0	0.034286	-0.017074	0.034286	-0.017074	0	0
ENST00000265343	AFF4	Q9UHB7	ENSG00000072364	27125	8	589	-46.63	-0.82	370	-46.63	-0.82	0	0	0	0.103642	-0.008205	0.065106	-0.008205	0	0
ENST00000265381	APBA1	Q02410	ENSG00000107282	320	9	154	-18.05	-0.9	108	-18.05	-0.9	0	0	0	0.040526	-0.004749	0.028421	-0.004749	0	0
ENST00000265421	POLB	P06746	ENSG00000070501	5423	8	5	-2.54	-0.55	5	-2.54	-0.55	0	0	0	0.032468	-0.016494	0.032468	-0.016494	0	0
ENST00000265431	CALB1	P05937	ENSG00000104327	793	4	62	-13.9	-0.67	47	-13.9	-0.67	0	0	0	0.039541	-0.008864	0.029974	-0.008864	0	0
ENST00000265433	NBN	O60934	ENSG00000104320	4683	1	2	-0.62	-0.43	2	-0.62	-0.43	0	0	0	0.000889	-0.000275	0.000889	-0.000275	0	0
ENST00000265465	POLA2	Q14181	ENSG00000014138	23649	1	14	-2.19	-0.61	13	-2.19	-0.61	0	0	0	0.009866	-0.001541	0.009161	-0.001541	0	0
ENST00000265562	PTPN23	Q9H3S7	ENSG00000076201	25930	9	7	-4.12	-0.73	7	-4.12	-0.73	0	0	0	0.027027	-0.015888	0.027027	-0.015888	0	0
ENST00000265563	PRKAR2A	P13861	ENSG00000114302	5576	7	133	-27.65	-0.97	93	-27.65	-0.97	0	0	0	0.026552	-0.00552	0.018567	-0.00552	0	0
ENST00000265564	EXOSC7	Q15024	ENSG00000075914	23016	4	12	-2.2	-0.48	10	-2.2	-0.48	0	0	0	0.089552	-0.016433	0.074627	-0.016433	0	0
ENST00000265717	PRKAR2B	P31323	ENSG00000005249	5577	9	80	-13.17	-0.48	61	-13.17	-0.48	0	0	0	0.035842	-0.005899	0.02733	-0.005899	0	0
ENST00000265729	SRI	P30626	ENSG00000075142	6717	1	204	-31.98	-1.17	123	-31.98	-1.17	0	0	0	0.14967	-0.023461	0.090242	-0.023461	0	0
ENST00000265734	CDK6	Q00534	ENSG00000105810	1021	2	595	-56.36	-1.03	260	-56.36	-1.03	0	0	0	0.058208	-0.005513	0.025435	-0.005513	0	0
ENST00000265753	EIF4H	Q15056	ENSG00000106682	7458	3	34	-6.21	-0.31	31	-6.21	-0.31	0	0	0	0.018931	-0.003458	0.017261	-0.003458	0	0
ENST00000265800	DMTN	Q08495	ENSG00000158856	2039	7	25	-2.44	-0.26	21	-2.44	-0.26	0	0	0	0.02343	-0.002291	0.019681	-0.002291	0	0
ENST00000265846	ADAP1	O75689	ENSG00000105963	11033	9	28	-4.83	-0.37	21	-4.83	-0.37	0	0	0	0.027424	-0.004732	0.020568	-0.004732	0	0
ENST00000265963	GTF2H1	P32780	ENSG00000110768	2965	6	73	-23.1	-0.78	67	-23.1	-0.78	0	0	0	0.061969	-0.019607	0.056876	-0.019607	0	0
ENST00000265970	PIK3C2A	O00443	ENSG00000011405	5286	1	240	-34.07	-0.8	197	-34.07	-0.8	0	0	0	0.075734	-0.01075	0.062165	-0.01075	0	0
ENST00000265986	IDE	P14735	ENSG00000119912	3416	2	166	-22.2	-0.87	122	-22.2	-0.87	0	0	0	0.06008	-0.008035	0.044155	-0.008035	0	0
ENST00000266037	DOCK3	Q8IZD9	ENSG00000088538	1795	8	165	-17.61	-0.78	133	-17.61	-0.78	0	0	0	0.062453	-0.006667	0.050341	-0.006667	0	0
ENST00000266070	DIDO1	Q9BTC0	ENSG00000101191	11083	6	41	-3.32	-0.31	32	-3.32	-0.31	0	0	0	0.02737	-0.002219	0.021362	-0.002219	0	0
ENST00000266126	EIF2B2	P49770	ENSG00000119718	8892	9	85	-9.74	-0.74	53	-9.74	-0.74	0	0	0	0.026721	-0.003062	0.016661	-0.003062	0	0
ENST00000266458	GABARAPL1	Q9H0R8	ENSG00000139112	23710	7	54	-20.77	-1.08	38	-20.77	-1.08	0	0	0	0.042155	-0.016215	0.029664	-0.016215	0	0
ENST00000266563	PEX5	P50542	ENSG00000139197	5830	8	42	-11.63	-0.61	40	-11.63	-0.61	0	0	0	0.033254	-0.009208	0.031671	-0.009208	0	0
ENST00000266604	LLPH	Q9BRT6	ENSG00000139233	84298	5	123	-9.23	-0.6	57	-9.23	-0.6	0	0	0	0.016877	-0.001267	0.007821	-0.001267	0	0
ENST00000266712	TMTC3	Q6ZXV5	ENSG00000139324	160418	1	105	-14.97	-0.5	71	-14.97	-0.5	0	0	0	0.024758	-0.003531	0.016741	-0.003531	0	0
ENST00000266732	TMPO	P42166	ENSG00000120802	7112	1	11	-2.1	-0.41	11	-2.1	-0.41	0	0	0	0.008494	-0.001623	0.008494	-0.001623	0	0
ENST00000266742	NEDD1	Q8NHV4	ENSG00000139350	121441	1	12	-1.94	-0.49	7	-1.94	-0.49	0	0	0	0.006948	-0.001125	0.004053	-0.001125	0	0
ENST00000266970	CDK2	P24941	ENSG00000123374	1017	1	16	-4.06	-0.33	16	-4.06	-0.33	0	0	0	0.013769	-0.003493	0.013769	-0.003493	0	0
ENST00000266987	TARBP2	Q15633	ENSG00000139546	6895	9	6	-2.41	-0.42	6	-2.41	-0.42	0	0	0	0.020979	-0.00843	0.020979	-0.00843	0	0
ENST00000267023	NABP2	Q9BQ15	ENSG00000139579	79035	3	4	-0.6	-0.16	4	-0.6	-0.16	0	0	0	0.006211	-0.000933	0.006211	-0.000933	0	0
ENST00000267163	RB1	P06400	ENSG00000139687	5925	1	58	-12.73	-0.5	50	-12.73	-0.5	0	0	0	0.031833	-0.006986	0.027442	-0.006986	0	0
ENST00000267202	VPS37B	Q9H9H4	ENSG00000139722	79720	2	60	-10.34	-0.57	44	-10.34	-0.57	0	0	0	0.033501	-0.005773	0.024567	-0.005773	0	0
ENST00000267396	REM2	Q8IYK8	ENSG00000139890	161253	9	6	-0.96	-0.29	6	-0.96	-0.29	0	0	0	0.007692	-0.001237	0.007692	-0.001237	0	0
ENST00000267540	STON2	Q8WXE9	ENSG00000140022	85439	1	201	-11.28	-0.85	76	-11.28	-0.85	0	0	0	3.29508	-0.184984	1.2459	-0.184984	0	0
ENST00000267615	ITPK1	Q13572	ENSG00000100605	3705	7	110	-12.87	-0.6	82	-12.87	-0.6	0	0	0	0.023656	-0.002769	0.017634	-0.002769	0	0
ENST00000267811	TCF12	Q99081	ENSG00000140262	6938	5	291	-49.04	-0.67	227	-49.04	-0.67	0	0	0	0.078416	-0.013215	0.061169	-0.013215	0	0
ENST00000267814	SORD	Q00796	ENSG00000140263	6652	3	60	-7.19	-0.46	36	-7.19	-0.46	0	0	0	0.016402	-0.001967	0.009841	-0.001967	0	0
ENST00000267996	TPM1	P09493	ENSG00000140416	7168	9	34	-15.7	-0.78	34	-15.7	-0.78	0	0	0	0.045576	-0.021047	0.045576	-0.021047	0	0
ENST00000268182	IQGAP1	P46940	ENSG00000140575	8826	2	47	-8.36	-0.94	38	-8.36	-0.94	0	0	0	0.021983	-0.00391	0.017774	-0.00391	0	0
ENST00000268251	ABAT	P80404	ENSG00000183044	18	4	181	-20.39	-1.03	122	-20.39	-1.03	0	0	0	0.057497	-0.006476	0.038755	-0.006476	0	0
ENST00000268379	UQCRC2	P22695	ENSG00000140740	7385	9	2	-0.24	-0.14	2	-0.24	-0.14	0	0	0	0.004065	-0.000488	0.004065	-0.000488	0	0
ENST00000268489	ZFHX3	Q15911	ENSG00000140836	463	7	440	-22.03	-0.43	319	-22.03	-0.43	0	0	0	0.102756	-0.005145	0.074498	-0.005145	0	0
ENST00000268712	NCOR1	O75376	ENSG00000141027	9611	5	85	-12.27	-0.48	67	-12.27	-0.48	0	0	0	0.027053	-0.003904	0.021324	-0.003904	0	0
ENST00000268797	GFOD2	Q3B7J2	ENSG00000141098	81577	9	6	-1.9	-0.57	5	-1.9	-0.57	0	0	0	0.0096	-0.003038	0.008	-0.003038	0	0
ENST00000269122	CLTC	Q00610	ENSG00000141367	1213	6	181	-30.39	-0.54	139	-30.39	-0.54	0	0	0	0.073547	-0.012351	0.056481	-0.012351	0	0
ENST00000269141	CDH2	P19022	ENSG00000170558	1000	1	278	-32.69	-0.6	193	-32.69	-0.6	0	0	0	0.233613	-0.027471	0.162185	-0.027471	0	0
ENST00000269143	AFG3L2	Q9Y4W6	ENSG00000141385	10939	6	22	-5.72	-0.51	22	-5.72	-0.51	0	0	0	0.035256	-0.009167	0.035256	-0.009167	0	0
ENST00000269187	SLC39A6	Q13433	ENSG00000141424	25800	7	23	-5.67	-0.59	21	-5.67	-0.59	0	0	0	0.021617	-0.005326	0.019737	-0.005326	0	0
ENST00000269195	GALNT1	Q10472	ENSG00000141429	2589	4	217	-43.89	-0.81	163	-43.89	-0.81	0	0	0	0.104983	-0.021234	0.078858	-0.021234	0	0
ENST00000269321	ARHGDIA	P52565	ENSG00000141522	396	6	85	-21.45	-0.65	74	-21.45	-0.65	0	0	0	0.073402	-0.018519	0.063903	-0.018519	0	0
ENST00000269349	EIF4A3	P38919	ENSG00000141543	9775	3	2	-0.39	-0.21	2	-0.39	-0.21	0	0	0	0.007168	-0.001409	0.007168	-0.001409	0	0
ENST00000269373	FN3KRP	Q9HA64	ENSG00000141560	79672	2	1	-0.13	-0.13	1	-0.13	-0.13	0	0	0	0.001178	-0.000157	0.001178	-0.000157	0	0
ENST00000269385	CBX8	Q9HC52	ENSG00000141570	57332	8	114	-15.43	-0.44	103	-15.43	-0.44	0	0	0	0.045491	-0.006156	0.041101	-0.006156	0	0
ENST00000269397	CBX4	O00257	ENSG00000141582	8535	6	98	-28.21	-0.73	84	-28.21	-0.73	0	0	0	0.121588	-0.034995	0.104218	-0.034995	0	0
ENST00000269701	AKAP8	O43823	ENSG00000105127	10270	2	7	-1.07	-0.34	5	-1.07	-0.34	0	0	0	0.004566	-0.000698	0.003262	-0.000698	0	0
ENST00000269886	SH3GL1	Q99961	ENSG00000141985	6455	9	42	-8.61	-0.44	39	-8.61	-0.44	0	0	0	0.034063	-0.006984	0.03163	-0.006984	0	0
ENST00000270176	SCYL1	Q96KG9	ENSG00000142186	57410	5	11	-6.25	-0.89	11	-6.25	-0.89	0	0	0	0.078014	-0.044333	0.078014	-0.044333	0	0
ENST00000270310	FXYD7	P58549	ENSG00000221946	53822	7	7	-1.59	-0.5	5	-1.59	-0.5	0	0	0	0.018041	-0.00409	0.012887	-0.00409	0	0
ENST00000270460	EPN1	Q9Y6I3	ENSG00000063245	29924	9	55	-13.84	-1.74	50	-13.84	-1.74	0	0	0	0.003879	-0.000976	0.003526	-0.000976	0	0
ENST00000270530	EVI5L	Q96CN4	ENSG00000142459	115704	8	76	-15.55	-0.72	71	-15.55	-0.72	0	0	0	0.059514	-0.012176	0.055599	-0.012176	0	0
ENST00000270722	PRDM16	Q9HAZ2	ENSG00000142611	63976	1	383	-40.98	-0.54	309	-40.98	-0.54	0	0	0	0.079576	-0.008515	0.064201	-0.008515	0	0
ENST00000271277	CTTNBP2NL	Q9P2B4	ENSG00000143079	55917	8	150	-24.42	-0.76	117	-24.42	-0.76	0	0	0	0.039947	-0.006504	0.031158	-0.006504	0	0
ENST00000271332	CELSR2	Q9HCU4	ENSG00000143126	1952	5	110	-18.86	-1.4	88	-18.86	-1.4	0	0	0	0.064554	-0.011066	0.051643	-0.011066	0	0
ENST00000271620	PRUNE1	Q86TP1	ENSG00000143363	58497	9	44	-9.19	-0.58	37	-9.19	-0.58	0	0	0	0.02969	-0.006199	0.024966	-0.006199	0	0
ENST00000271732	GOLPH3L	Q9H4A5	ENSG00000143457	55204	1	32	-8.67	-0.62	26	-8.67	-0.62	0	0	0	0.015245	-0.004132	0.012387	-0.004132	0	0
ENST00000272163	LBR	Q14739	ENSG00000143815	3930	1	82	-17.05	-0.82	62	-17.05	-0.82	0	0	0	0.045455	-0.009452	0.034368	-0.009452	0	0
ENST00000272217	ARL8A	Q96BM9	ENSG00000143862	127829	9	20	-5.37	-0.49	20	-5.37	-0.49	0	0	0	0.018762	-0.005037	0.018762	-0.005037	0	0
ENST00000272227	PDIA6	Q15084	ENSG00000143870	10130	3	44	-13.52	-0.55	43	-13.52	-0.55	0	0	0	0.050575	-0.015543	0.049425	-0.015543	0	0
ENST00000272233	RHOB	P62745	ENSG00000143878	388	9	44	-17.17	-0.95	36	-17.17	-0.95	0	0	0	0.031609	-0.012332	0.025862	-0.012332	0	0
ENST00000272252	GALM	Q96C23	ENSG00000143891	130589	1	3	-0.71	-0.26	3	-0.71	-0.26	0	0	0	0.002488	-0.000585	0.002488	-0.000585	0	0
ENST00000272298	CALM2	P0DP24	ENSG00000143933	805	9	27	-10.61	-1.15	25	-10.61	-1.15	0	0	0	0.038737	-0.015217	0.035868	-0.015217	0	0
ENST00000272433	SFXN5	Q8TD22	ENSG00000144040	94097	1	100	-14.94	-0.73	63	-14.94	-0.73	0	0	0	0.033456	-0.004997	0.021077	-0.004997	0	0
ENST00000272638	UBXN4	Q92575	ENSG00000144224	23190	1	41	-9.52	-0.61	31	-9.52	-0.61	0	0	0	0.018885	-0.004383	0.014279	-0.004383	0	0
ENST00000272793	UBR3	Q6ZT12	ENSG00000144357	130507	7	197	-26.36	-0.53	137	-26.36	-0.53	0	0	0	0.085989	-0.011504	0.059799	-0.011504	0	0
ENST00000273038	VGLL4	Q14135	ENSG00000144560	9686	2	171	-29.84	-0.77	136	-29.84	-0.77	0	0	0	0.068702	-0.011991	0.05464	-0.011991	0	0
ENST00000273047	RAB5A	P20339	ENSG00000144566	5868	6	60	-19.89	-0.97	49	-19.89	-0.97	0	0	0	0.04428	-0.014683	0.036162	-0.014683	0	0
ENST00000273075	DNPEP	Q9ULA0	ENSG00000123992	23549	6	3	-0.98	-0.39	3	-0.98	-0.39	0	0	0	0.004005	-0.001303	0.004005	-0.001303	0	0
ENST00000273130	DYNC1LI1	Q9Y6G9	ENSG00000144635	51143	8	11	-3.41	-0.42	10	-3.41	-0.42	0	0	0	0.013237	-0.004101	0.012034	-0.004101	0	0
ENST00000273221	IQSEC1	Q6DN90	ENSG00000144711	9922	4	65	-14.07	-0.58	57	-14.07	-0.58	0	0	0	0.029913	-0.006473	0.026231	-0.006473	0	0
ENST00000273258	ARL6IP5	O75915	ENSG00000144746	10550	7	24	-6.88	-0.57	18	-6.88	-0.57	0	0	0	0.016748	-0.004799	0.012561	-0.004799	0	0
ENST00000273317	LIMD1	Q9UGP4	ENSG00000144791	8994	1	106	-11.73	-0.71	53	-11.73	-0.71	0	0	0	0.01142	-0.001264	0.00571	-0.001264	0	0
ENST00000273398	ATP6V1A	P38606	ENSG00000114573	523	9	91	-17.52	-0.75	72	-17.52	-0.75	0	0	0	0.034574	-0.006658	0.027356	-0.006658	0	0
ENST00000273482	TRPC1	P48995	ENSG00000144935	7220	5	52	-5.17	-0.36	31	-5.17	-0.36	0	0	0	0.031401	-0.003124	0.01872	-0.003124	0	0
ENST00000273596	ABHD14A	Q9BUJ0	ENSG00000248487	25864	7	4	-2.52	-0.64	4	-2.52	-0.64	0	0	0	0.022099	-0.013901	0.022099	-0.013901	0	0
ENST00000273783	EIF2B5	Q13144	ENSG00000145191	8893	9	21	-5.17	-0.42	21	-5.17	-0.42	0	0	0	0.056604	-0.013927	0.056604	-0.013927	0	0
ENST00000273853	CENPC	Q03188	ENSG00000145241	1060	1	3	-0.86	-0.33	3	-0.86	-0.33	0	0	0	0.000777	-0.000222	0.000777	-0.000222	0	0
ENST00000273854	EPHA5	P54756	ENSG00000145242	2044	7	220	-24.37	-0.73	128	-24.37	-0.73	0	0	0	0.048309	-0.00535	0.028107	-0.00535	0	0
ENST00000273860	OCIAD2	Q56VL3	ENSG00000145247	132299	9	76	-10.49	-0.67	40	-10.49	-0.67	0	0	0	0.520548	-0.071884	0.273973	-0.071884	0	0
ENST00000273920	ENOPH1	Q9UHY7	ENSG00000145293	58478	8	8	-2.09	-0.64	5	-2.09	-0.64	0	0	0	0.008214	-0.002147	0.005133	-0.002147	0	0
ENST00000274008	SPATA5	Q8NB90	ENSG00000145375	166378	1	24	-1.21	-0.25	17	-1.21	-0.25	0	0	0	0.004454	-0.000224	0.003155	-0.000224	0	0
ENST00000274026	CCNA2	P20248	ENSG00000145386	890	1	67	-13.07	-0.89	57	-13.07	-0.89	0	0	0	0.055973	-0.01092	0.047619	-0.01092	0	0
ENST00000274031	SETD7	Q8WTS6	ENSG00000145391	80854	6	388	-45.23	-0.59	247	-45.23	-0.59	0	0	0	0.068917	-0.008033	0.043872	-0.008033	0	0
ENST00000274364	IQGAP2	Q13576	ENSG00000145703	10788	1	91	-18.24	-0.58	83	-18.24	-0.58	0	0	0	0.110706	-0.022184	0.100973	-0.022184	0	0
ENST00000274458	COMMD10	Q9Y6G5	ENSG00000145781	51397	3	26	-5.69	-0.59	21	-5.69	-0.59	0	0	0	0.032459	-0.007099	0.026217	-0.007099	0	0
ENST00000274695	CDKAL1	Q5VV42	ENSG00000145996	54901	1	11	-2.07	-0.37	11	-2.07	-0.37	0	0	0	0.008041	-0.001514	0.008041	-0.001514	0	0
ENST00000274710	PSD2	Q9BQI7	ENSG00000146005	84249	8	106	-11.14	-0.43	85	-11.14	-0.43	0	0	0	0.053133	-0.005585	0.042607	-0.005585	0	0
ENST00000274712	ZMAT2	Q96NC0	ENSG00000146007	153527	8	69	-14.42	-0.8	50	-14.42	-0.8	0	0	0	0.074756	-0.015619	0.054171	-0.015619	0	0
ENST00000275034	PHIP	Q8WWQ0	ENSG00000146247	55023	1	396	-34.08	-0.62	205	-34.08	-0.62	0	0	0	0.082005	-0.007057	0.042452	-0.007057	0	0
ENST00000275036	HMGN3	Q15651	ENSG00000118418	9324	1	100	-28.24	-0.85	71	-28.24	-0.85	0	0	0	0.212314	-0.05996	0.150743	-0.05996	0	0
ENST00000275053	MMS22L	Q6ZRQ5	ENSG00000146263	253714	1	23	-1.35	-0.26	14	-1.35	-0.26	0	0	0	0.004948	-0.00029	0.003012	-0.00029	0	0
ENST00000275072	PM20D2	Q8IYS1	ENSG00000146281	135293	1	40	-4.3	-0.54	23	-4.3	-0.54	0	0	0	0.012103	-0.001301	0.006959	-0.001301	0	0
ENST00000275162	CLVS2	Q5SYC1	ENSG00000146352	134829	8	270	-33.74	-0.93	121	-33.74	-0.93	0	0	0	0.029447	-0.003679	0.013197	-0.003679	0	0
ENST00000275493	EGFR	P00533	ENSG00000146648	1956	2	120	-9.76	-0.66	60	-9.76	-0.66	0	0	0	0.019953	-0.001622	0.009977	-0.001622	0	0
ENST00000275605	PSPH	P78330	ENSG00000146733	5723	1	19	-5.07	-0.44	16	-5.07	-0.44	0	0	0	0.027221	-0.007256	0.022923	-0.007256	0	0
ENST00000275732	GIGYF1	O75420	ENSG00000146830	64599	2	215	-19.33	-0.45	197	-19.33	-0.45	0	0	0	0.097065	-0.008729	0.088939	-0.008729	0	0
ENST00000275766	ZC3HAV1L	Q96H79	ENSG00000146858	92092	1	40	-7.97	-1.1	21	-7.97	-1.1	0	0	0	0.047562	-0.009479	0.02497	-0.009479	0	0
ENST00000276079	NONO	Q15233	ENSG00000147140	4841	3	25	-4.93	-0.5	23	-4.93	-0.5	0	0	0	0.022831	-0.004501	0.021005	-0.004501	0	0
ENST00000276204	DOCK11	Q5JSL3	ENSG00000147251	139818	1	84	-10.67	-0.64	58	-10.67	-0.64	0	0	0	0.233983	-0.02973	0.16156	-0.02973	0	0
ENST00000276390	ATP6V1B2	P21281	ENSG00000147416	526	9	44	-8.42	-0.58	39	-8.42	-0.58	0	0	0	0.033794	-0.006469	0.029954	-0.006469	0	0
ENST00000276461	ERLIN2	O94905	ENSG00000147475	11160	1	119	-18.88	-0.79	75	-18.88	-0.79	0	0	0	0.023852	-0.003784	0.015033	-0.003784	0	0
ENST00000276480	ST18	O60284	ENSG00000147488	9705	3	139	-21.94	-0.79	108	-21.94	-0.79	0	0	0	0.058848	-0.009291	0.045724	-0.009291	0	0
ENST00000276569	ARMC1	Q9NVT9	ENSG00000104442	55156	9	82	-23.65	-0.99	67	-23.65	-0.99	0	0	0	0.042246	-0.012186	0.034518	-0.012186	0	0
ENST00000276602	TERF1	P54274	ENSG00000147601	7013	1	32	-4.36	-0.34	24	-4.36	-0.34	0	0	0	0.016097	-0.002193	0.012072	-0.002193	0	0
ENST00000276689	NDUFB9	Q9Y6M9	ENSG00000147684	4715	7	172	-26.52	-0.74	155	-26.52	-0.74	0	0	0	1.91111	-0.294633	1.72222	-0.294633	0	0
ENST00000277225	ZNF462	Q96JM2	ENSG00000148143	58499	6	230	-27.32	-0.6	178	-27.32	-0.6	0	0	0	0.088224	-0.01048	0.068278	-0.01048	0	0
ENST00000277459	ASB6	Q9NWX5	ENSG00000148331	140459	9	170	-26.09	-1	103	-26.09	-1	0	0	0	0.11612	-0.017819	0.070355	-0.017819	0	0
ENST00000277541	NOTCH1	P46531	ENSG00000148400	4851	1	96	-14.62	-1.31	75	-14.62	-1.31	0	0	0	0.058501	-0.008907	0.045704	-0.008907	0	0
ENST00000277865	GLUD1	P00367	ENSG00000148672	2746	3	38	-11.61	-0.83	30	-11.61	-0.83	0	0	0	0.029968	-0.009153	0.023659	-0.009153	0	0
ENST00000278193	LIN7C	Q9NUP9	ENSG00000148943	55327	8	229	-40.51	-1.11	156	-40.51	-1.11	0	0	0	0.056183	-0.009939	0.038273	-0.009939	0	0
ENST00000278353	HSD17B12	Q53GQ0	ENSG00000149084	51144	3	14	-1.43	-0.42	5	-1.43	-0.42	0	0	0	0.010256	-0.001051	0.003663	-0.001051	0	0
ENST00000278379	SLC1A2	P43004	ENSG00000110436	6506	8	163	-10.77	-0.49	64	-10.77	-0.49	0	0	0	0.016818	-0.001111	0.006603	-0.001111	0	0
ENST00000278412	SSRP1	Q08945	ENSG00000149136	6749	1	20	-8.27	-0.52	20	-8.27	-0.52	0	0	0	0.047059	-0.019454	0.047059	-0.019454	0	0
ENST00000278505	ENDOD1	O94919	ENSG00000149218	23052	7	81	-8.37	-0.43	46	-8.37	-0.43	0	0	0	0.026393	-0.002727	0.014989	-0.002727	0	0
ENST00000278550	TENM4	Q6N022	ENSG00000149256	26011	5	282	-13.71	-0.53	167	-13.71	-0.53	0	0	0	0.05392	-0.002621	0.031931	-0.002621	0	0
ENST00000278559	CAPN5	O15484	ENSG00000149260	726	8	98	-16.68	-0.84	71	-16.68	-0.84	0	0	0	0.042832	-0.00729	0.031031	-0.00729	0	0
ENST00000278568	PAK1	Q13153	ENSG00000149269	5058	7	58	-12.06	-0.59	50	-12.06	-0.59	0	0	0	0.163842	-0.034073	0.141243	-0.034073	0	0
ENST00000278572	RPS3	P23396	ENSG00000149273	6188	3	9	-3.62	-0.6	8	-3.62	-0.6	0	0	0	0.080357	-0.032295	0.071429	-0.032295	0	0
ENST00000278618	AASDHPPT	Q9NRN7	ENSG00000149313	60496	7	7	-1.32	-0.47	5	-1.32	-0.47	0	0	0	0.003876	-0.000731	0.002769	-0.000731	0	0
ENST00000278823	MTA2	O94776	ENSG00000149480	9219	6	19	-3.96	-0.54	17	-3.96	-0.54	0	0	0	0.028614	-0.005962	0.025602	-0.005962	0	0
ENST00000278893	BSCL2	Q96G97	ENSG00000168000	26580	9	12	-4.18	-0.51	12	-4.18	-0.51	0	0	0	0.042105	-0.014667	0.042105	-0.014667	0	0
ENST00000279034	SOGA1	O94964	ENSG00000149639	140710	8	33	-9.36	-0.55	33	-9.36	-0.55	0	0	0	0.10061	-0.028537	0.10061	-0.028537	0	0
ENST00000279550	YBX3	P16989	ENSG00000060138	8531	1	39	-21.24	-1.3	39	-21.24	-1.3	0	0	0	0.064677	-0.035231	0.064677	-0.035231	0	0
ENST00000280097	HNMT	P50135	ENSG00000150540	3176	2	52	-8.31	-0.52	34	-8.31	-0.52	0	0	0	0.023245	-0.003713	0.015199	-0.003713	0	0
ENST00000280154	PDCD4	Q53EL6	ENSG00000150593	27250	1	228	-45.92	-0.74	187	-45.92	-0.74	0	0	0	0.118688	-0.023903	0.097345	-0.023903	0	0
ENST00000280155	ADRA2A	P08913	ENSG00000150594	150	5	60	-11.88	-0.57	59	-11.88	-0.57	0	0	0	0.039578	-0.007834	0.038918	-0.007834	0	0
ENST00000280187	GPM6A	P51674	ENSG00000150625	2823	8	174	-42.51	-0.77	153	-42.51	-0.77	0	0	0	0.088146	-0.021534	0.077508	-0.021534	0	0
ENST00000280285	MTMR12	Q9C0I1	ENSG00000150712	54545	5	218	-35.78	-0.83	172	-35.78	-0.83	0	0	0	0.07822	-0.012838	0.061715	-0.012838	0	0
ENST00000280326	CCT5	P48643	ENSG00000150753	22948	7	12	-5.46	-0.71	10	-5.46	-0.71	0	0	0	0.007353	-0.003343	0.006127	-0.003343	0	0
ENST00000280333	DOCK1	Q14185	ENSG00000150760	1793	1	16	-4.82	-0.41	16	-4.82	-0.41	0	0	0	0.014639	-0.004406	0.014639	-0.004406	0	0
ENST00000280772	ANK3	Q12955	ENSG00000151150	288	7	329	-36.37	-1.04	233	-36.37	-1.04	0	0	0	0.09265	-0.010243	0.065615	-0.010243	0	0
ENST00000280800	PLBD2	Q8NHP8	ENSG00000151176	196463	9	13	-3.06	-0.39	11	-3.06	-0.39	0	0	0	0.00433	-0.001018	0.003664	-0.001018	0	0
ENST00000280886	DIP2C	Q9Y2E4	ENSG00000151240	22982	8	210	-26.01	-0.42	163	-26.01	-0.42	0	0	0	0.067093	-0.008309	0.052077	-0.008309	0	0
ENST00000280987	FAM177A1	Q8N128	ENSG00000151327	283635	9	65	-16.27	-0.74	49	-16.27	-0.74	0	0	0	0.03012	-0.007541	0.022706	-0.007541	0	0
ENST00000281031	NDUFC2	O95298	ENSG00000151366	4718	7	3	-1.26	-0.43	3	-1.26	-0.43	0	0	0	0.001779	-0.000747	0.001779	-0.000747	0	0
ENST00000281156	KHDRBS2	Q5VWX1	ENSG00000112232	202559	7	97	-18.14	-0.75	85	-18.14	-0.75	0	0	0	0.096421	-0.018032	0.084493	-0.018032	0	0
ENST00000281187	VPS26B	Q4G0F5	ENSG00000151502	112936	9	72	-11.26	-0.46	61	-11.26	-0.46	0	0	0	0.032653	-0.005108	0.027664	-0.005108	0	0
ENST00000281273	QTRT2	Q9H974	ENSG00000151576	79691	1	19	-4.05	-0.55	15	-4.05	-0.55	0	0	0	0.007537	-0.001606	0.00595	-0.001606	0	0
ENST00000281317	MMAA	Q8IVH4	ENSG00000151611	166785	9	17	-0.53	-0.13	9	-0.53	-0.13	0	0	0	0.003692	-0.000115	0.001955	-0.000115	0	0
ENST00000281394	PPP1R21	Q6ZMI0	ENSG00000162869	129285	9	13	-4.84	-0.49	13	-4.84	-0.49	0	0	0	0.020155	-0.007499	0.020155	-0.007499	0	0
ENST00000281453	CENPU	Q71F23	ENSG00000151725	79682	1	3	-0.45	-0.22	2	-0.45	-0.22	0	0	0	0.004458	-0.000661	0.002972	-0.000661	0	0
ENST00000281456	SLC25A4	P12235	ENSG00000151729	291	9	29	-7.55	-0.58	23	-7.55	-0.58	0	0	0	0.008494	-0.002212	0.006737	-0.002212	0	0
ENST00000281741	TXNDC16	Q9P2K2	ENSG00000087301	57544	5	16	-2.27	-0.34	9	-2.27	-0.34	0	0	0	0.009319	-0.001321	0.005242	-0.001321	0	0
ENST00000281821	EPHA4	P54764	ENSG00000116106	2043	4	212	-30.8	-0.9	171	-30.8	-0.9	0	0	0	0.063359	-0.009207	0.051106	-0.009207	0	0
ENST00000281828	FARSB	Q9NSD9	ENSG00000116120	10056	9	24	-2.66	-0.41	16	-2.66	-0.41	0	0	0	0.017937	-0.001986	0.011958	-0.001986	0	0
ENST00000281928	MED13L	Q71F56	ENSG00000123066	23389	7	137	-6.9	-0.27	97	-6.9	-0.27	0	0	0	0.018521	-0.000933	0.013113	-0.000933	0	0
ENST00000282050	ATP5F1A	P25705	ENSG00000152234	498	7	6	-1.21	-0.26	6	-1.21	-0.26	0	0	0	0.042553	-0.008596	0.042553	-0.008596	0	0
ENST00000282077	PDK1	Q15118	ENSG00000152256	5163	4	62	-8.82	-0.78	23	-8.82	-0.78	0	0	0	0.004881	-0.000694	0.001811	-0.000694	0	0
ENST00000282272	ANKRD44	Q8N8A2	ENSG00000065413	91526	9	191	-35.48	-0.8	140	-35.48	-0.8	0	0	0	0.090693	-0.016846	0.066477	-0.016846	0	0
ENST00000282356	CAMK4	Q16566	ENSG00000152495	814	9	229	-22.72	-0.82	106	-22.72	-0.82	0	0	0	0.021971	-0.00218	0.01017	-0.00218	0	0
ENST00000282369	TRIM36	Q9NQ86	ENSG00000152503	55521	8	44	-8.84	-0.6	32	-8.84	-0.6	0	0	0	0.025229	-0.005071	0.018349	-0.005071	0	0
ENST00000282388	ZFP36L2	P47974	ENSG00000152518	678	1	439	-75.51	-1.19	342	-75.51	-1.19	0	0	0	0.228646	-0.039326	0.178125	-0.039326	0	0
ENST00000282441	YAP1	P46937	ENSG00000137693	10413	1	106	-16.59	-0.47	76	-16.59	-0.47	0	0	0	0.030407	-0.004759	0.021801	-0.004759	0	0
ENST00000282541	GPD1L	Q8N335	ENSG00000152642	23171	9	89	-15.69	-0.91	60	-15.69	-0.91	0	0	0	0.031718	-0.00559	0.021383	-0.00559	0	0
ENST00000282561	GJA1	P17302	ENSG00000152661	2697	1	130	-31.94	-1.01	111	-31.94	-1.01	0	0	0	0.074971	-0.018422	0.064014	-0.018422	0	0
ENST00000282841	GGPS1	O95749	ENSG00000152904	9453	9	10	-2.67	-0.52	8	-2.67	-0.52	0	0	0	0.005672	-0.001513	0.004538	-0.001513	0	0
ENST00000282924	JAKMIP1	Q96N16	ENSG00000152969	152789	9	38	-15.73	-0.65	38	-15.73	-0.65	0	0	0	0.171946	-0.071195	0.171946	-0.071195	0	0
ENST00000283027	NUBP1	P53384	ENSG00000103274	4682	1	6	-1.56	-0.49	6	-1.56	-0.49	0	0	0	0.024096	-0.006261	0.024096	-0.006261	0	0
ENST00000283131	SMARCA5	O60264	ENSG00000153147	8467	1	301	-38.68	-0.67	223	-38.68	-0.67	0	0	0	0.069919	-0.008984	0.0518	-0.008984	0	0
ENST00000283351	TRAPPC8	Q9Y2L5	ENSG00000153339	22878	8	171	-35.7	-0.64	147	-35.7	-0.64	0	0	0	0.107886	-0.022524	0.092744	-0.022524	0	0
ENST00000283365	DTNA	Q9Y4J8	ENSG00000134769	1837	7	255	-29.54	-0.86	176	-29.54	-0.86	0	0	0	0.061999	-0.007183	0.042791	-0.007183	0	0
ENST00000283646	RPIA	P49247	ENSG00000153574	22934	6	33	-8.03	-0.9	33	-8.03	-0.9	0	0	0	0.038372	-0.009342	0.038372	-0.009342	0	0
ENST00000283943	TRIP12	Q14669	ENSG00000153827	9320	6	109	-10.55	-0.48	78	-10.55	-0.48	0	0	0	0.029309	-0.002837	0.020973	-0.002837	0	0
ENST00000284006	KCTD15	Q96SI1	ENSG00000153885	79047	2	132	-17.29	-0.9	82	-17.29	-0.9	0	0	0	0.0333	-0.004362	0.020686	-0.004362	0	0
ENST00000284037	ERBIN	Q96RT1	ENSG00000112851	55914	1	184	-28.92	-0.69	129	-28.92	-0.69	0	0	0	0.045748	-0.007191	0.032074	-0.007191	0	0
ENST00000284049	CHD1	O14646	ENSG00000153922	1105	1	238	-37.66	-0.62	201	-37.66	-0.62	0	0	0	0.201866	-0.031945	0.170483	-0.031945	0	0
ENST00000284061	DGKE	P52429	ENSG00000153933	8526	8	182	-24.56	-0.88	100	-24.56	-0.88	0	0	0	0.026848	-0.003622	0.014751	-0.003622	0	0
ENST00000284073	MSI2	Q96DH6	ENSG00000153944	124540	2	553	-75.29	-0.7	394	-75.29	-0.7	0	0	0	0.106943	-0.014559	0.076194	-0.014559	0	0
ENST00000284116	GDPD1	Q8N9F7	ENSG00000153982	284161	9	43	-9.52	-0.55	36	-9.52	-0.55	0	0	0	0.057951	-0.01283	0.048518	-0.01283	0	0
ENST00000284202	IMPACT	Q9P2X3	ENSG00000154059	55364	1	99	-11.9	-0.62	74	-11.9	-0.62	0	0	0	0.036789	-0.004424	0.027499	-0.004424	0	0
ENST00000284240	THY1	P04216	ENSG00000154096	7070	9	24	-5.27	-0.51	21	-5.27	-0.51	0	0	0	0.011805	-0.002591	0.01033	-0.002591	0	0
ENST00000284274	OTULIN	Q96BN8	ENSG00000154124	90268	1	111	-15.18	-1.03	44	-15.18	-1.03	0	0	0	0.016652	-0.002278	0.006601	-0.002278	0	0
ENST00000284320	TOMM70	O94826	ENSG00000154174	9868	9	81	-22.01	-1.07	68	-22.01	-1.07	0	0	0	0.037921	-0.010305	0.031835	-0.010305	0	0
ENST00000284637	SH3RF1	Q7Z6J0	ENSG00000154447	57630	1	99	-15.6	-0.59	70	-15.6	-0.59	0	0	0	0.043689	-0.006885	0.030891	-0.006885	0	0
ENST00000284770	PDLIM3	Q53GG5	ENSG00000154553	27295	1	19	-5.44	-1.09	7	-5.44	-1.09	0	0	0	0.031667	-0.009067	0.011667	-0.009067	0	0
ENST00000284776	SORBS2	O94875	ENSG00000154556	8470	7	37	-8.77	-0.69	28	-8.77	-0.69	0	0	0	0.016926	-0.004013	0.012809	-0.004013	0	0
ENST00000284957	RABGEF1	Q9UJ41	ENSG00000154710	27342	8	43	-6.43	-0.38	31	-6.43	-0.38	0	0	0	0.019698	-0.002944	0.014201	-0.002944	0	0
ENST00000285021	XPC	Q01831	ENSG00000154767	7508	1	2	-0.59	-0.36	2	-0.59	-0.36	0	0	0	0.002509	-0.000743	0.002509	-0.000743	0	0
ENST00000285039	MYO5B	Q9ULV0	ENSG00000167306	4645	6	64	-7.45	-0.62	41	-7.45	-0.62	0	0	0	0.017482	-0.002036	0.011199	-0.002036	0	0
ENST00000285093	ACAA2	P42765	ENSG00000167315	10449	3	35	-12.13	-1.07	34	-12.13	-1.07	0	0	0	0.020796	-0.007205	0.020202	-0.007205	0	0
ENST00000285208	RAB6B	Q9NRW1	ENSG00000154917	51560	7	166	-29.7	-0.8	116	-29.7	-0.8	0	0	0	0.036467	-0.006524	0.025483	-0.006524	0	0
ENST00000285379	CA2	P00918	ENSG00000104267	760	1	19	-7.85	-0.8	15	-7.85	-0.8	0	0	0	0.026874	-0.011098	0.021216	-0.011098	0	0
ENST00000285419	PIP4P2	Q8N4L2	ENSG00000155099	55529	9	214	-48	-0.88	161	-48	-0.88	0	0	0	0.113588	-0.02548	0.085456	-0.02548	0	0
ENST00000285420	OTUD6B	Q8N6M0	ENSG00000155100	51633	6	34	-10.18	-0.65	27	-10.18	-0.65	0	0	0	0.015247	-0.004565	0.012108	-0.004565	0	0
ENST00000285518	AGPAT5	Q9NUQ2	ENSG00000155189	55326	3	94	-12.22	-0.63	56	-12.22	-0.63	0	0	0	0.04121	-0.005356	0.024551	-0.005356	0	0
ENST00000285848	OXA1L	Q15070	ENSG00000155463	5018	3	25	-7.2	-0.63	21	-7.2	-0.63	0	0	0	0.106838	-0.030765	0.089744	-0.030765	0	0
ENST00000285873	GEMIN5	Q8TEQ6	ENSG00000082516	25929	1	31	-2.87	-0.35	25	-2.87	-0.35	0	0	0	0.038896	-0.003598	0.031368	-0.003598	0	0
ENST00000285896	CNOT8	Q9UFF9	ENSG00000155508	9337	9	40	-11.51	-0.61	36	-11.51	-0.61	0	0	0	0.029477	-0.008486	0.026529	-0.008486	0	0
ENST00000285900	GRIA1	P42261	ENSG00000155511	2890	9	100	-15.82	-0.45	84	-15.82	-0.45	0	0	0	0.037779	-0.005978	0.031734	-0.005978	0	0
ENST00000285930	AKR1B1	P15121	ENSG00000085662	231	4	6	-1.51	-0.32	6	-1.51	-0.32	0	0	0	0.015748	-0.003963	0.015748	-0.003963	0	0
ENST00000286067	LCOR	Q96JN0	ENSG00000196233	84458	7	126	-21.28	-0.56	103	-21.28	-0.56	0	0	0	0.181556	-0.030663	0.148415	-0.030663	0	0
ENST00000286091	PDIA4	P13667	ENSG00000155660	9601	2	20	-9.2	-0.69	19	-9.2	-0.69	0	0	0	0.027211	-0.012514	0.02585	-0.012514	0	0
ENST00000286175	PPIL3	Q9H2H8	ENSG00000240344	53938	6	5	-2	-0.53	4	-2	-0.53	0	0	0	0.010183	-0.004079	0.008147	-0.004079	0	0
ENST00000286307	LSM11	P83369	ENSG00000155858	134353	9	180	-31.12	-1.93	104	-31.12	-1.93	0	0	0	0.03304	-0.005712	0.01909	-0.005712	0	0
ENST00000286364	RASA2	Q15283	ENSG00000155903	5922	5	211	-27.9	-0.59	160	-27.9	-0.59	0	0	0	0.069591	-0.009202	0.05277	-0.009202	0	0
ENST00000286448	VAMP7	P51809	ENSG00000124333	6845	8	39	-10.09	-0.6	28	-10.09	-0.6	0	0	0	0.021417	-0.005539	0.015376	-0.005539	0	0
ENST00000286548	GNAQ	P50148	ENSG00000156052	2776	9	432	-56.62	-1.04	257	-56.62	-1.04	0	0	0	0.082458	-0.010807	0.049055	-0.010807	0	0
ENST00000286688	C8orf37	Q96NL8	ENSG00000156172	157657	1	36	-6.15	-0.97	18	-6.15	-0.97	0	0	0	0.013328	-0.002277	0.006664	-0.002277	0	0
ENST00000286713	STOM	P27105	ENSG00000148175	2040	6	21	-7.73	-0.67	17	-7.73	-0.67	0	0	0	0.009868	-0.003633	0.007989	-0.003633	0	0
ENST00000286835	SCAF4	O95104	ENSG00000156304	57466	6	16	-3.28	-0.38	15	-3.28	-0.38	0	0	0	0.04336	-0.008883	0.04065	-0.008883	0	0
ENST00000287394	ATAD2	Q6PL18	ENSG00000156802	29028	1	49	-8.36	-0.47	36	-8.36	-0.47	0	0	0	0.038073	-0.006497	0.027972	-0.006497	0	0
ENST00000287437	NSMCE2	Q96MF7	ENSG00000156831	286053	1	8	-3.38	-0.93	7	-3.38	-0.93	0	0	0	0.033613	-0.014189	0.029412	-0.014189	0	0
ENST00000287546	VPS8	Q8N3P4	ENSG00000156931	23355	9	2	-0.12	-0.1	2	-0.12	-0.1	0	0	0	0.003378	-0.000196	0.003378	-0.000196	0	0
ENST00000287936	HMGCR	P04035	ENSG00000113161	3156	4	193	-24.08	-0.52	149	-24.08	-0.52	0	0	0	0.109348	-0.013645	0.084419	-0.013645	0	0
ENST00000287957	GATAD1	Q8WUU5	ENSG00000157259	57798	5	5	-1.6	-0.87	4	-1.6	-0.87	0	0	0	0.00174	-0.000558	0.001392	-0.000558	0	0
ENST00000288022	PDF	Q9HBH1	ENSG00000258429	64146	6	51	-8.16	-0.95	38	-8.16	-0.95	0	0	0	0.126238	-0.020188	0.094059	-0.020188	0	0
ENST00000288111	DHRS1	Q96LJ7	ENSG00000157379	115817	5	8	-2.45	-0.59	5	-2.45	-0.59	0	0	0	0.030303	-0.009265	0.018939	-0.009265	0	0
ENST00000288221	ERC2	O15083	ENSG00000187672	26059	9	123	-18.43	-0.36	109	-18.43	-0.36	0	0	0	0.04085	-0.006122	0.036201	-0.006122	0	0
ENST00000288235	MYO1E	Q12965	ENSG00000157483	4643	2	86	-16.12	-0.46	76	-16.12	-0.46	0	0	0	0.017377	-0.003258	0.015357	-0.003258	0	0
ENST00000288466	ZNF618	Q5T7W0	ENSG00000157657	114991	4	516	-43.71	-0.83	334	-43.71	-0.83	0	0	0	0.080286	-0.006802	0.051968	-0.006802	0	0
ENST00000288670	FMNL2	Q96PY5	ENSG00000157827	114793	9	113	-21.24	-0.54	96	-21.24	-0.54	0	0	0	0.058489	-0.010994	0.049689	-0.010994	0	0
ENST00000288699	DPYSL5	Q9BPU6	ENSG00000157851	56896	9	193	-21.05	-0.75	145	-21.05	-0.75	0	0	0	0.057458	-0.006268	0.043168	-0.006268	0	0
ENST00000288937	MRPL17	Q9NRX2	ENSG00000158042	63875	3	94	-17.23	-0.89	52	-17.23	-0.89	0	0	0	0.070202	-0.012864	0.038835	-0.012864	0	0
ENST00000289228	ACTR1B	P42025	ENSG00000115073	10120	8	5	-1.19	-0.35	5	-1.19	-0.35	0	0	0	0.005568	-0.001325	0.005568	-0.001325	0	0
ENST00000289495	PPP1R9A	Q9ULJ8	ENSG00000158528	55607	9	352	-28.41	-0.64	200	-28.41	-0.64	0	0	0	5.5	-0.443875	3.125	-0.443875	0	0
ENST00000290101	RAP1GAP	P47736	ENSG00000076864	5909	9	13	-2.39	-0.32	11	-2.39	-0.32	0	0	0	0.0104	-0.001914	0.0088	-0.001914	0	0
ENST00000290158	KPNB1	Q14974	ENSG00000108424	3837	1	250	-31.15	-0.46	186	-31.15	-0.46	0	0	0	0.080541	-0.010035	0.059923	-0.010035	0	0
ENST00000290231	NCOA5	Q9HCD5	ENSG00000124160	57727	6	22	-4.28	-0.38	22	-4.28	-0.38	0	0	0	0.016692	-0.00325	0.016692	-0.00325	0	0
ENST00000290246	ELMO2	Q96JJ3	ENSG00000062598	63916	8	55	-8.55	-0.32	52	-8.55	-0.32	0	0	0	0.041857	-0.006507	0.039574	-0.006507	0	0
ENST00000290291	OGFR	Q9NZT2	ENSG00000060491	11054	5	9	-3.14	-0.46	9	-3.14	-0.46	0	0	0	0.025424	-0.008867	0.025424	-0.008867	0	0
ENST00000290299	ATP5PO	P48047	ENSG00000241837	539	7	2	-0.39	-0.2	2	-0.39	-0.2	0	0	0	0.026316	-0.005158	0.026316	-0.005158	0	0
ENST00000290341	IGF2BP1	Q9NZI8	ENSG00000159217	10642	4	545	-50.19	-1.86	324	-50.19	-1.86	0	0	0	0.087776	-0.008084	0.052182	-0.008084	0	0
ENST00000290573	HK2	P52789	ENSG00000159399	3099	4	71	-9.41	-0.51	51	-9.41	-0.51	0	0	0	0.029327	-0.003885	0.021066	-0.003885	0	0
ENST00000290585	CELF3	Q5SZQ8	ENSG00000159409	11189	9	100	-16.2	-0.76	76	-16.2	-0.76	0	0	0	0.094518	-0.015314	0.071834	-0.015314	0	0
ENST00000290776	CPNE2	Q96FN4	ENSG00000140848	221184	1	94	-21.4	-0.68	79	-21.4	-0.68	0	0	0	0.132022	-0.030052	0.110955	-0.030052	0	0
ENST00000290858	CBFB	Q13951	ENSG00000067955	865	3	207	-53.94	-0.84	148	-53.94	-0.84	0	0	0	0.088879	-0.023161	0.063547	-0.023161	0	0
ENST00000290913	CHCHD6	Q9BRQ6	ENSG00000159685	84303	7	5	-2.71	-1.12	3	-2.71	-1.12	0	0	0	0.024038	-0.013014	0.014423	-0.013014	0	0
ENST00000290949	ATP6V0D1	P61421	ENSG00000159720	9114	9	19	-5.11	-0.41	19	-5.11	-0.41	0	0	0	0.037109	-0.009986	0.037109	-0.009986	0	0
ENST00000291439	AP1M1	Q9BXS5	ENSG00000072958	8907	9	5	-0.66	-0.17	5	-0.66	-0.17	0	0	0	0.000436	-5.7e-05	0.000436	-5.7e-05	0	0
ENST00000291547	PKNOX1	P55347	ENSG00000160199	5316	2	190	-31.94	-0.73	137	-31.94	-0.73	0	0	0	0.054535	-0.009167	0.039323	-0.009167	0	0
ENST00000291572	AGPAT3	Q9NRZ7	ENSG00000160216	56894	5	145	-23.86	-0.64	109	-23.86	-0.64	0	0	0	0.034965	-0.005753	0.026284	-0.005753	0	0
ENST00000291700	S100B	P04271	ENSG00000160307	6285	2	5	-1.04	-0.25	5	-1.04	-0.25	0	0	0	0.012376	-0.002569	0.012376	-0.002569	0	0
ENST00000291722	CACFD1	Q9UGQ2	ENSG00000160325	11094	9	39	-10.54	-0.48	34	-10.54	-0.48	0	0	0	0.017743	-0.004795	0.015469	-0.004795	0	0
ENST00000291900	ZER1	Q7Z7L7	ENSG00000160445	10444	8	126	-19.92	-0.47	104	-19.92	-0.47	0	0	0	0.081081	-0.01282	0.066924	-0.01282	0	0
ENST00000292377	GPC2	Q8N158	ENSG00000213420	221914	8	15	-4.02	-0.55	13	-4.02	-0.55	0	0	0	0.023923	-0.006418	0.020734	-0.006418	0	0
ENST00000292599	MAML1	Q92585	ENSG00000161021	9794	2	156	-21.35	-0.57	135	-21.35	-0.57	0	0	0	0.064677	-0.00885	0.05597	-0.00885	0	0
ENST00000292823	PCYT1A	P49585	ENSG00000161217	5130	2	22	-4.38	-0.5	14	-4.38	-0.5	0	0	0	0.005089	-0.001012	0.003238	-0.001012	0	0
ENST00000293217	ACOX1	Q15067	ENSG00000161533	51	6	110	-17.46	-0.75	76	-17.46	-0.75	0	0	0	0.020976	-0.00333	0.014493	-0.00333	0	0
ENST00000293230	CYGB	Q8WWM9	ENSG00000161544	114757	7	35	-8.22	-0.52	30	-8.22	-0.52	0	0	0	0.028571	-0.00671	0.02449	-0.00671	0	0
ENST00000293328	STAT5B	P51692	ENSG00000173757	6777	1	78	-12.2	-0.64	63	-12.2	-0.64	0	0	0	0.030315	-0.004743	0.024485	-0.004743	0	0
ENST00000293677	RAVER1	Q8IY67	ENSG00000161847	125950	1	53	-10.88	-0.61	44	-10.88	-0.61	0	0	0	0.04257	-0.008739	0.035341	-0.008739	0	0
ENST00000294053	CLPB	Q9H078	ENSG00000162129	81570	9	59	-8.55	-0.77	35	-8.55	-0.77	0	0	0	0.007492	-0.001086	0.004444	-0.001086	0	0
ENST00000294189	RPL29	P47914	ENSG00000162244	6159	3	2	-0.37	-0.19	2	-0.37	-0.19	0	0	0	0.013158	-0.002447	0.013158	-0.002447	0	0
ENST00000294353	ZYG11B	Q9C0D3	ENSG00000162378	79699	8	9	-0.43	-0.15	4	-0.43	-0.15	0	0	0	0.001575	-7.5e-05	0.0007	-7.5e-05	0	0
ENST00000294740	ZNF281	Q9Y2X9	ENSG00000162702	23528	5	449	-44.83	-0.91	279	-44.83	-0.91	0	0	0	0.215762	-0.021541	0.13407	-0.021541	0	0
ENST00000294785	NCSTN	Q92542	ENSG00000162736	23385	1	16	-4.74	-0.77	15	-4.74	-0.77	0	0	0	0.023392	-0.006927	0.02193	-0.006927	0	0
ENST00000294981	MAPKAPK2	P49137	ENSG00000162889	9261	1	49	-7.98	-0.47	40	-7.98	-0.47	0	0	0	0.063226	-0.010302	0.051613	-0.010302	0	0
ENST00000295006	CAPN2	P17655	ENSG00000162909	824	2	22	-5.64	-0.56	18	-5.64	-0.56	0	0	0	0.0189	-0.004842	0.015464	-0.004842	0	0
ENST00000295049	RFTN2	Q52LD8	ENSG00000162944	130132	2	51	-8.4	-0.6	38	-8.4	-0.6	0	0	0	0.013467	-0.002217	0.010034	-0.002217	0	0
ENST00000295065	MEMO1	Q9Y316	ENSG00000162959	51072	4	161	-35.78	-1.02	120	-35.78	-1.02	0	0	0	0.048729	-0.010829	0.03632	-0.010829	0	0
ENST00000295238	CCNT2	O60583	ENSG00000082258	905	5	554	-76.67	-0.79	365	-76.67	-0.79	0	0	0	0.22411	-0.031013	0.147654	-0.031013	0	0
ENST00000295324	CDC42EP3	Q9UKI2	ENSG00000163171	10602	8	133	-17.13	-0.47	82	-17.13	-0.47	0	0	0	0.033782	-0.004352	0.020828	-0.004352	0	0
ENST00000295588	POGLUT1	Q8NBL1	ENSG00000163389	56983	5	57	-15.15	-0.72	42	-15.15	-0.72	0	0	0	0.025077	-0.006665	0.018478	-0.006665	0	0
ENST00000295598	ATP1A1	P05023	ENSG00000163399	476	4	14	-3.82	-0.43	14	-3.82	-0.43	0	0	0	0.042042	-0.01148	0.042042	-0.01148	0	0
ENST00000295633	FSTL1	Q12841	ENSG00000163430	11167	1	127	-21.95	-0.64	80	-21.95	-0.64	0	0	0	0.027242	-0.004709	0.01716	-0.004709	0	0
ENST00000295685	ARPC2	O15144	ENSG00000163466	10109	9	49	-8.66	-0.59	45	-8.66	-0.59	0	0	0	0.11036	-0.019498	0.101351	-0.019498	0	0
ENST00000295688	CCT3	P49368	ENSG00000163468	7203	7	30	-9.6	-0.74	28	-9.6	-0.74	0	0	0	0.128205	-0.041034	0.119658	-0.041034	0	0
ENST00000295743	EOMES	O95936	ENSG00000163508	8320	1	72	-15.9	-0.62	63	-15.9	-0.62	0	0	0	0.064057	-0.014146	0.05605	-0.014146	0	0
ENST00000295746	CIP2A	Q8TCG1	ENSG00000163507	57650	1	9	-1.41	-0.33	6	-1.41	-0.33	0	0	0	0.007015	-0.001099	0.004677	-0.001099	0	0
ENST00000295767	CHCHD4	Q8N4Q1	ENSG00000163528	131474	7	45	-10.58	-0.73	30	-10.58	-0.73	0	0	0	0.055351	-0.013011	0.0369	-0.013011	0	0
ENST00000295770	STT3B	Q8TCJ2	ENSG00000163527	201595	7	138	-23.72	-0.47	101	-23.72	-0.47	0	0	0	0.088405	-0.015193	0.064702	-0.015193	0	0
ENST00000295955	RPL9	P32969	ENSG00000163682	6133	3	6	-1.4	-0.67	3	-1.4	-0.67	0	0	0	0.052174	-0.012139	0.026087	-0.012139	0	0
ENST00000295962	ABHD6	Q9BV23	ENSG00000163686	57406	9	40	-12.78	-0.87	35	-12.78	-0.87	0	0	0	0.041152	-0.013149	0.036008	-0.013149	0	0
ENST00000296135	LZTFL1	Q9NQ48	ENSG00000163818	54585	1	5	-0.86	-0.3	3	-0.86	-0.3	0	0	0	0.001666	-0.000286	0.001	-0.000286	0	0
ENST00000296292	RFT1	Q96AA3	ENSG00000163933	91869	1	10	-1.9	-0.37	8	-1.9	-0.37	0	0	0	0.002921	-0.000555	0.002337	-0.000555	0	0
ENST00000296412	ADH5	P11766	ENSG00000197894	128	2	3	-0.26	-0.14	2	-0.26	-0.14	0	0	0	0.00208	-0.000178	0.001387	-0.000178	0	0
ENST00000296424	BDH2	Q9BUT1	ENSG00000164039	56898	1	4	-1.28	-0.48	4	-1.28	-0.48	0	0	0	0.014815	-0.004752	0.014815	-0.004752	0	0
ENST00000296425	PGRMC2	O15173	ENSG00000164040	10424	1	152	-38.91	-0.95	121	-38.91	-0.95	0	0	0	0.073182	-0.018732	0.058257	-0.018732	0	0
ENST00000296440	PLXNB1	O43157	ENSG00000164050	5364	1	44	-2.72	-0.26	32	-2.72	-0.26	0	0	0	0.069291	-0.004285	0.050394	-0.004285	0	0
ENST00000296452	BSN	Q9UPA5	ENSG00000164061	8927	9	337	-27.49	-1.93	230	-27.49	-1.93	0	0	0	0.082944	-0.006765	0.056608	-0.006765	0	0
ENST00000296464	HSPA4L	O95757	ENSG00000164070	22824	1	418	-44.31	-1.28	232	-44.31	-1.28	0	0	0	0.053167	-0.005635	0.029509	-0.005635	0	0
ENST00000296471	CAMKV	Q8NCB2	ENSG00000164076	79012	9	78	-13.32	-0.65	38	-13.32	-0.65	0	0	0	0.058559	-0.009996	0.028529	-0.009996	0	0
ENST00000296484	POC1A	Q8NBT0	ENSG00000164087	25886	1	35	-3.84	-0.72	16	-3.84	-0.72	0	0	0	0.054945	-0.006024	0.025118	-0.006024	0	0
ENST00000296490	WDR82	Q6UXN9	ENSG00000164091	80335	8	207	-34.94	-1.06	151	-34.94	-1.06	0	0	0	0.067383	-0.011374	0.049154	-0.011374	0	0
ENST00000296503	HMGB2	P26583	ENSG00000164104	3148	1	103	-22.59	-1.14	63	-22.59	-1.14	0	0	0	0.265464	-0.058222	0.162371	-0.058222	0	0
ENST00000296504	SAP30	O75446	ENSG00000164105	8819	1	42	-6.14	-0.72	25	-6.14	-0.72	0	0	0	0.201923	-0.029524	0.120192	-0.029524	0	0
ENST00000296509	MAD2L1	Q13257	ENSG00000164109	4085	1	32	-2.71	-0.43	20	-2.71	-0.43	0	0	0	0.007091	-0.000601	0.004432	-0.000601	0	0
ENST00000296511	ANXA5	P08758	ENSG00000164111	308	1	18	-5.65	-0.48	16	-5.65	-0.48	0	0	0	0.034884	-0.010942	0.031008	-0.010942	0	0
ENST00000296526	GRIA2	P42262	ENSG00000120251	2891	8	101	-10.28	-0.33	70	-10.28	-0.33	0	0	0	0.038156	-0.003885	0.026445	-0.003885	0	0
ENST00000296550	DCLK2	Q8N568	ENSG00000170390	166614	8	14	-2.01	-0.21	14	-2.01	-0.21	0	0	0	0.011542	-0.00166	0.011542	-0.00166	0	0
ENST00000296585	ITGA2	P17301	ENSG00000164171	3673	1	77	-7.93	-0.44	49	-7.93	-0.44	0	0	0	0.018408	-0.001896	0.011714	-0.001896	0	0
ENST00000296603	LMBRD2	Q68DH5	ENSG00000164187	92255	9	106	-11.41	-0.48	57	-11.41	-0.48	0	0	0	0.018804	-0.002024	0.010112	-0.002024	0	0
ENST00000296666	PRRC1	Q96M27	ENSG00000164244	133619	6	64	-12	-0.72	42	-12	-0.72	0	0	0	0.020151	-0.003779	0.013224	-0.003779	0	0
ENST00000296684	NDUFS4	O43181	ENSG00000164258	4724	7	21	-8.21	-0.86	20	-8.21	-0.86	0	0	0	0.172131	-0.067287	0.163934	-0.067287	0	0
ENST00000296734	GPX8	Q8TED1	ENSG00000164294	493869	1	65	-19.96	-1.1	37	-19.96	-1.1	0	0	0	0.022026	-0.006763	0.012538	-0.006763	0	0
ENST00000296755	MAP1B	P46821	ENSG00000131711	4131	9	287	-21.1	-0.38	207	-21.1	-0.38	0	0	0	0.066221	-0.004868	0.047762	-0.004868	0	0
ENST00000296824	CCDC127	Q96BQ5	ENSG00000164366	133957	8	1	-0.03	-0.03	1	-0.03	-0.03	0	0	0	0.000119	-4e-06	0.000119	-4e-06	0	0
ENST00000297142	NEUROD6	Q96NK8	ENSG00000164600	63974	8	43	-13.38	-0.72	40	-13.38	-0.72	0	0	0	0.053952	-0.016792	0.050188	-0.016792	0	0
ENST00000297151	SLU7	O95391	ENSG00000164609	10569	2	25	-3.37	-0.44	21	-3.37	-0.44	0	0	0	0.015179	-0.002046	0.01275	-0.002046	0	0
ENST00000297290	BRI3	O95415	ENSG00000164713	25798	9	14	-4.3	-0.49	14	-4.3	-0.49	0	0	0	0.049296	-0.015134	0.049296	-0.015134	0	0
ENST00000297338	RAD21	O60216	ENSG00000164754	5885	1	68	-12.53	-0.48	62	-12.53	-0.48	0	0	0	0.043367	-0.007989	0.039541	-0.007989	0	0
ENST00000297431	ORC5	O43913	ENSG00000164815	5001	5	46	-12.21	-0.55	40	-12.21	-0.55	0	0	0	0.090196	-0.023937	0.078431	-0.023937	0	0
ENST00000297440	DNAAF5	Q86Y56	ENSG00000164818	54919	1	3	-0.93	-0.49	3	-0.93	-0.49	0	0	0	0.003636	-0.001125	0.003636	-0.001125	0	0
ENST00000297540	PHAX	Q9H814	ENSG00000164902	51808	5	74	-18.63	-1.01	46	-18.63	-1.01	0	0	0	0.030693	-0.007727	0.019079	-0.007727	0	0
ENST00000298198	PGM2L1	Q6PCE3	ENSG00000165434	283209	9	209	-25.77	-0.75	125	-25.77	-0.75	0	0	0	0.032981	-0.004067	0.019725	-0.004067	0	0
ENST00000298229	INPPL1	O15357	ENSG00000165458	3636	1	9	-1.91	-0.26	9	-1.91	-0.26	0	0	0	0.011921	-0.002531	0.011921	-0.002531	0	0
ENST00000298299	ZNF22	P17026	ENSG00000165512	7570	1	4	-0.89	-0.26	4	-0.89	-0.26	0	0	0	0.00311	-0.000695	0.00311	-0.000695	0	0
ENST00000298310	NEMF	O60524	ENSG00000165525	9147	7	14	-0.96	-0.21	13	-0.96	-0.21	0	0	0	0.005477	-0.000376	0.005086	-0.000376	0	0
ENST00000298316	ARF6	P62330	ENSG00000165527	382	5	143	-29.55	-0.89	94	-29.55	-0.89	0	0	0	0.051199	-0.010579	0.033656	-0.010579	0	0
ENST00000298355	TRIM9	Q9C026	ENSG00000100505	114088	2	65	-11.34	-0.6	57	-11.34	-0.6	0	0	0	0.031988	-0.005578	0.028051	-0.005578	0	0
ENST00000298552	TSC1	Q92574	ENSG00000165699	7248	8	278	-32.4	-0.91	176	-32.4	-0.91	0	0	0	0.056851	-0.006627	0.035992	-0.006627	0	0
ENST00000298556	HPRT1	P00492	ENSG00000165704	3251	5	16	-7.35	-0.72	16	-7.35	-0.72	0	0	0	0.026936	-0.012374	0.026936	-0.012374	0	0
ENST00000298694	ARHGEF40	Q8TER5	ENSG00000165801	55701	1	79	-10.55	-0.69	74	-10.55	-0.69	0	0	0	0.063968	-0.00854	0.059919	-0.00854	0	0
ENST00000298767	WAPL	Q7Z5K2	ENSG00000062650	23063	1	227	-40.88	-0.58	194	-40.88	-0.58	0	0	0	0.099127	-0.017851	0.084716	-0.017851	0	0
ENST00000298838	PACSIN3	Q9UKS6	ENSG00000165912	29763	1	3	-0.83	-0.38	3	-0.83	-0.38	0	0	0	0.007335	-0.002032	0.007335	-0.002032	0	0
ENST00000298875	CPSF2	Q9P2I0	ENSG00000165934	53981	1	68	-9.58	-0.4	52	-9.58	-0.4	0	0	0	0.006536	-0.000921	0.004998	-0.000921	0	0
ENST00000299106	JAM3	Q9BX67	ENSG00000166086	83700	1	39	-5.45	-0.52	31	-5.45	-0.52	0	0	0	0.013815	-0.001931	0.010981	-0.001931	0	0
ENST00000299204	BAG5	Q9UL15	ENSG00000166170	9529	6	76	-15.44	-0.63	55	-15.44	-0.63	0	0	0	0.023171	-0.004708	0.016768	-0.004708	0	0
ENST00000299237	ZNF319	Q9P2F9	ENSG00000166188	57567	5	25	-1.66	-0.27	19	-1.66	-0.27	0	0	0	0.013499	-0.000895	0.010259	-0.000895	0	0
ENST00000299299	PCBD1	P61457	ENSG00000166228	5092	1	16	-4.65	-0.43	15	-4.65	-0.43	0	0	0	0.036117	-0.010492	0.03386	-0.010492	0	0
ENST00000299381	ANAPC16	Q96DE5	ENSG00000166295	119504	4	114	-23.28	-1.14	88	-23.28	-1.14	0	0	0	0.0415	-0.008475	0.032035	-0.008475	0	0
ENST00000299518	IDH3A	P50213	ENSG00000166411	3419	9	20	-5.05	-0.5	16	-5.05	-0.5	0	0	0	0.006787	-0.001713	0.005429	-0.001713	0	0
ENST00000299563	RNF169	Q8NCN4	ENSG00000166439	254225	5	162	-14.01	-0.49	95	-14.01	-0.49	0	0	0	0.028491	-0.002464	0.016708	-0.002464	0	0
ENST00000299613	WEE1	P30291	ENSG00000166483	7465	1	250	-53.91	-0.94	191	-53.91	-0.94	0	0	0	0.180505	-0.038921	0.137906	-0.038921	0	0
ENST00000299633	HDGFL3	Q9Y3E1	ENSG00000166503	50810	9	82	-15.39	-0.79	46	-15.39	-0.79	0	0	0	0.007118	-0.001336	0.003993	-0.001336	0	0
ENST00000299705	TMED3	Q9Y3Q3	ENSG00000166557	23423	7	4	-1.04	-0.33	4	-1.04	-0.33	0	0	0	0.006289	-0.001635	0.006289	-0.001635	0	0
ENST00000299927	ZNF592	Q92610	ENSG00000166716	9640	6	133	-9.98	-0.54	81	-9.98	-0.54	0	0	0	0.032921	-0.002471	0.02005	-0.002471	0	0
ENST00000299980	AP1G1	O43747	ENSG00000166747	164	9	182	-24.14	-0.58	120	-24.14	-0.58	0	0	0	0.044817	-0.005944	0.029549	-0.005944	0	0
ENST00000300027	FANCI	Q9NVI1	ENSG00000140525	55215	1	6	-0.55	-0.12	6	-0.55	-0.12	0	0	0	0.007453	-0.000682	0.007453	-0.000682	0	0
ENST00000300086	TERF2IP	Q9NYB0	ENSG00000166848	54386	9	3	-0.56	-0.2	3	-0.56	-0.2	0	0	0	0.003641	-0.000682	0.003641	-0.000682	0	0
ENST00000300146	PATL1	Q86TB9	ENSG00000166889	219988	6	60	-10.65	-0.52	55	-10.65	-0.52	0	0	0	0.035778	-0.006349	0.032797	-0.006349	0	0
ENST00000300456	SLC27A4	Q6P1M0	ENSG00000167114	10999	7	122	-16.19	-0.72	70	-16.19	-0.72	0	0	0	0.124236	-0.016487	0.071283	-0.016487	0	0
ENST00000300651	MED1	Q15648	ENSG00000125686	5469	2	297	-28.41	-0.55	239	-28.41	-0.55	0	0	0	0.338655	-0.032393	0.27252	-0.032393	0	0
ENST00000300738	RRM1	P23921	ENSG00000167325	6240	1	43	-11.53	-0.95	31	-11.53	-0.95	0	0	0	0.086694	-0.023248	0.0625	-0.023248	0	0
ENST00000300797	PRRT2	Q7Z6L0	ENSG00000167371	112476	9	110	-19.01	-0.95	81	-19.01	-0.95	0	0	0	0.057024	-0.009852	0.041991	-0.009852	0	0
ENST00000300811	ZNF428	Q96B54	ENSG00000131116	126299	9	8	-2.56	-0.35	8	-2.56	-0.35	0	0	0	0.01995	-0.006392	0.01995	-0.006392	0	0
ENST00000300933	TPM4	P67936	ENSG00000167460	7171	5	59	-18.78	-0.87	49	-18.78	-0.87	0	0	0	0.035499	-0.011301	0.029483	-0.011301	0	0
ENST00000300935	RAB8A	P61006	ENSG00000167461	4218	1	69	-20.37	-0.69	66	-20.37	-0.69	0	0	0	0.035696	-0.010538	0.034144	-0.010538	0	0
ENST00000301050	CACNB3	P54284	ENSG00000167535	784	8	36	-10.89	-0.44	35	-10.89	-0.44	0	0	0	0.03445	-0.01042	0.033493	-0.01042	0	0
ENST00000301071	TUBA1A	Q71U36	ENSG00000167552	7846	5	18	-9.17	-0.73	18	-9.17	-0.73	0	0	0	0.082949	-0.042249	0.082949	-0.042249	0	0
ENST00000301149	GPD1	P21695	ENSG00000167588	2819	6	18	-2.08	-0.38	18	-2.08	-0.38	0	0	0	0.009983	-0.001155	0.009983	-0.001155	0	0
ENST00000301180	DIP2B	Q9P265	ENSG00000066084	57609	2	133	-12.52	-0.48	89	-12.52	-0.48	0	0	0	0.034717	-0.003268	0.023232	-0.003268	0	0
ENST00000301194	TTYH1	Q9H313	ENSG00000167614	57348	1	7	-2.96	-0.48	7	-2.96	-0.48	0	0	0	0.011419	-0.004835	0.011419	-0.004835	0	0
ENST00000301280	CHAF1A	Q13111	ENSG00000167670	10036	1	16	-4.22	-0.29	16	-4.22	-0.29	0	0	0	0.043243	-0.011419	0.043243	-0.011419	0	0
ENST00000301364	TSR1	Q2NL82	ENSG00000167721	55720	5	49	-7.12	-0.38	45	-7.12	-0.38	0	0	0	0.028892	-0.004198	0.026533	-0.004198	0	0
ENST00000301457	NDUFA7	O95182	ENSG00000267855	4701	3	35	-8.53	-1.12	13	-8.53	-1.12	0	0	0	0.15625	-0.038094	0.058036	-0.038094	0	0
ENST00000301459	RCOR2	Q8IZ40	ENSG00000167771	283248	1	6	-2.44	-0.46	6	-2.44	-0.46	0	0	0	0.009274	-0.003776	0.009274	-0.003776	0	0
ENST00000301522	PRDX2	P32119	ENSG00000167815	7001	7	2	-0.22	-0.14	2	-0.22	-0.14	0	0	0	0.007576	-0.000841	0.007576	-0.000841	0	0
ENST00000301732	ABCA3	Q99758	ENSG00000167972	21	9	7	-1.14	-0.29	7	-1.14	-0.29	0	0	0	0.008794	-0.001431	0.008794	-0.001431	0	0
ENST00000301740	SRRM2	Q9UQ35	ENSG00000167978	23524	1	28	-3.63	-0.21	24	-3.63	-0.21	0	0	0	0.051095	-0.006628	0.043796	-0.006628	0	0
ENST00000301785	HNRNPUL2	Q1KMD3	ENSG00000214753	221092	8	152	-22.94	-0.58	108	-22.94	-0.58	0	0	0	0.056886	-0.008586	0.040419	-0.008586	0	0
ENST00000301894	NRXN2	Q9P2S2	ENSG00000110076	9379	9	34	-4.62	-0.61	31	-4.62	-0.61	0	0	0	0.033171	-0.004504	0.030244	-0.004504	0	0
ENST00000302102	ATP1A3	P13637	ENSG00000105409	478	9	25	-4.37	-0.81	16	-4.37	-0.81	0	0	0	0.069832	-0.012193	0.044693	-0.012193	0	0
ENST00000302165	IRF2BP1	Q8IU81	ENSG00000170604	26145	6	13	-2.09	-0.28	13	-2.09	-0.28	0	0	0	0.03125	-0.005014	0.03125	-0.005014	0	0
ENST00000302190	SDC2	P34741	ENSG00000169439	6383	1	346	-69.76	-1.07	215	-69.76	-1.07	0	0	0	0.15481	-0.031212	0.096197	-0.031212	0	0
ENST00000302262	GAA	P10253	ENSG00000171298	2548	9	4	-1.17	-0.34	4	-1.17	-0.34	0	0	0	0.00726	-0.002116	0.00726	-0.002116	0	0
ENST00000302313	WDR48	Q8TAF3	ENSG00000114742	57599	5	26	-6.37	-0.52	25	-6.37	-0.52	0	0	0	0.015777	-0.003863	0.01517	-0.003863	0	0
ENST00000302326	MN1	Q10571	ENSG00000169184	4330	6	116	-12.33	-0.47	97	-12.33	-0.47	0	0	0	0.043923	-0.00467	0.036729	-0.00467	0	0
ENST00000302350	CDKN2AIP	Q9NXV6	ENSG00000168564	55602	8	81	-20.8	-1.23	56	-20.8	-1.23	0	0	0	0.03848	-0.00988	0.026603	-0.00988	0	0
ENST00000302351	ENC1	O14682	ENSG00000171617	8507	6	91	-17.18	-0.63	76	-17.18	-0.63	0	0	0	0.034706	-0.006551	0.028986	-0.006551	0	0
ENST00000302418	KIF5B	P33176	ENSG00000170759	3799	1	86	-18.87	-0.68	71	-18.87	-0.68	0	0	0	0.033992	-0.007457	0.028063	-0.007457	0	0
ENST00000302503	MTCH2	Q9Y6C9	ENSG00000109919	23788	7	73	-17	-0.66	62	-17	-0.66	0	0	0	0.048026	-0.011186	0.040789	-0.011186	0	0
ENST00000302516	SF3B3	Q15393	ENSG00000189091	23450	1	100	-6.96	-0.43	58	-6.96	-0.43	0	0	0	0.017071	-0.001189	0.009901	-0.001189	0	0
ENST00000302517	CXXC5	Q7LFL8	ENSG00000171604	51523	4	77	-20.37	-0.65	77	-20.37	-0.65	0	0	0	0.078732	-0.020824	0.078732	-0.020824	0	0
ENST00000302536	VAT1L	Q9HCJ6	ENSG00000171724	57687	4	174	-34.68	-0.76	134	-34.68	-0.76	0	0	0	0.07205	-0.014361	0.055487	-0.014361	0	0
ENST00000302538	ABR	Q12979	ENSG00000159842	29	7	107	-13.56	-0.47	90	-13.56	-0.47	0	0	0	0.041715	-0.005288	0.035088	-0.005288	0	0
ENST00000302584	NEUROD2	Q15784	ENSG00000171532	4761	9	101	-12.99	-0.53	77	-12.99	-0.53	0	0	0	0.149852	-0.019269	0.114243	-0.019269	0	0
ENST00000302609	ZNF25	P17030	ENSG00000175395	219749	9	29	-4.9	-0.38	22	-4.9	-0.38	0	0	0	0.011337	-0.001915	0.0086	-0.001915	0	0
ENST00000302764	NUDCD2	Q8WVJ2	ENSG00000170584	134492	1	75	-12.88	-1.06	53	-12.88	-1.06	0	0	0	0.010075	-0.00173	0.00712	-0.00173	0	0
ENST00000302787	LETM1	O95202	ENSG00000168924	3954	9	14	-2.71	-0.33	14	-2.71	-0.33	0	0	0	0.004749	-0.00092	0.004749	-0.00092	0	0
ENST00000303177	NSG2	Q9Y328	ENSG00000170091	51617	9	85	-9.09	-0.45	66	-9.09	-0.45	0	0	0	0.050686	-0.005422	0.039356	-0.005422	0	0
ENST00000303210	GNB2	P62879	ENSG00000172354	2783	4	13	-3.74	-0.42	13	-3.74	-0.42	0	0	0	0.034574	-0.009936	0.034574	-0.009936	0	0
ENST00000303305	PA2G4	Q9UQ80	ENSG00000170515	5036	3	26	-4.84	-0.69	21	-4.84	-0.69	0	0	0	0.026639	-0.004955	0.021516	-0.004955	0	0
ENST00000303329	ARNT2	Q9HBZ2	ENSG00000172379	9915	2	62	-5.23	-0.41	41	-5.23	-0.41	0	0	0	0.014616	-0.001232	0.009665	-0.001232	0	0
ENST00000303375	MRC2	Q9UBG0	ENSG00000011028	9902	1	42	-5.36	-0.53	38	-5.36	-0.53	0	0	0	0.036554	-0.004669	0.033072	-0.004669	0	0
ENST00000303391	MECP2	P51608	ENSG00000169057	4204	9	341	-28.18	-0.61	188	-28.18	-0.61	0	0	0	0.038763	-0.003203	0.021371	-0.003203	0	0
ENST00000303400	MAEA	Q7L5Y9	ENSG00000090316	10296	6	42	-11.23	-0.63	36	-11.23	-0.63	0	0	0	0.043254	-0.011563	0.037075	-0.011563	0	0
ENST00000303531	PRKCB	P05771	ENSG00000166501	5579	4	83	-6.96	-0.32	45	-6.96	-0.32	0	0	0	0.014315	-0.0012	0.007761	-0.0012	0	0
ENST00000303538	PDS5A	Q29RF7	ENSG00000121892	23244	1	236	-29.73	-0.65	190	-29.73	-0.65	0	0	0	0.089905	-0.011326	0.072381	-0.011326	0	0
ENST00000303577	PCBP1	Q15365	ENSG00000169564	5093	1	29	-9.79	-0.45	28	-9.79	-0.45	0	0	0	0.07398	-0.024969	0.071429	-0.024969	0	0
ENST00000303622	MARK3	P27448	ENSG00000075413	4140	8	47	-16.33	-0.76	47	-16.33	-0.76	0	0	0	0.07743	-0.0269	0.07743	-0.0269	0	0
ENST00000303991	GPRIN1	Q7Z2K8	ENSG00000169258	114787	9	5	-1.93	-0.45	5	-1.93	-0.45	0	0	0	0.004955	-0.001911	0.004955	-0.001911	0	0
ENST00000304056	KBTBD2	Q8IY47	ENSG00000170852	25948	6	94	-15.07	-0.68	87	-15.07	-0.68	0	0	0	0.079932	-0.01281	0.07398	-0.01281	0	0
ENST00000304191	RAMAC	Q9BTL3	ENSG00000169612	83640	9	6	-4.26	-0.77	6	-4.26	-0.77	0	0	0	0.006042	-0.004287	0.006042	-0.004287	0	0
ENST00000304593	MFF	Q9GZY8	ENSG00000168958	56947	8	35	-7.38	-0.86	27	-7.38	-0.86	0	0	0	0.048611	-0.010243	0.0375	-0.010243	0	0
ENST00000304623	CTNND2	Q9UQB3	ENSG00000169862	1501	7	101	-20.15	-0.58	81	-20.15	-0.58	0	0	0	0.0625	-0.012468	0.050124	-0.012468	0	0
ENST00000304863	UQCRFS1	P47985	ENSG00000169021	7386	7	23	-2.42	-0.45	10	-2.42	-0.45	0	0	0	0.010314	-0.001086	0.004484	-0.001086	0	0
ENST00000304874	ASL	P04424	ENSG00000126522	435	1	1	-0.15	-0.15	1	-0.15	-0.15	0	0	0	0.001541	-0.000236	0.001541	-0.000236	0	0
ENST00000305124	GAP43	P17677	ENSG00000172020	2596	9	64	-22.12	-0.86	63	-22.12	-0.86	0	0	0	0.104746	-0.036208	0.10311	-0.036208	0	0
ENST00000305253	TUB	P50607	ENSG00000166402	7275	9	186	-25.36	-1.13	122	-25.36	-1.13	0	0	0	0.04137	-0.005641	0.027135	-0.005641	0	0
ENST00000305409	SCG2	P13521	ENSG00000171951	7857	7	10	-3.67	-0.43	10	-3.67	-0.43	0	0	0	0.020325	-0.007455	0.020325	-0.007455	0	0
ENST00000305476	SEMA4C	Q9C0C4	ENSG00000168758	54910	6	104	-20.39	-0.66	85	-20.39	-0.66	0	0	0	0.11391	-0.022332	0.0931	-0.022332	0	0
ENST00000305596	CD2BP2	O95400	ENSG00000169217	10421	6	10	-0.93	-0.31	4	-0.93	-0.31	0	0	0	0.0045	-0.000419	0.0018	-0.000419	0	0
ENST00000305626	RAB33B	Q9H082	ENSG00000172007	83452	5	68	-13.88	-0.65	55	-13.88	-0.65	0	0	0	0.019507	-0.003981	0.015777	-0.003981	0	0
ENST00000305632	TBL2	Q9Y4P3	ENSG00000106638	26608	2	26	-5.33	-1.06	17	-5.33	-1.06	0	0	0	0.008734	-0.001792	0.00571	-0.001792	0	0
ENST00000305747	CERS6	Q6ZMG9	ENSG00000172292	253782	6	245	-34.25	-0.72	137	-34.25	-0.72	0	0	0	0.044724	-0.006253	0.025009	-0.006253	0	0
ENST00000305786	CYCS	P99999	ENSG00000172115	54205	9	46	-10.19	-0.81	28	-10.19	-0.81	0	0	0	0.012732	-0.00282	0.00775	-0.00282	0	0
ENST00000305877	BCR	P11274	ENSG00000186716	613	7	55	-7.75	-0.37	44	-7.75	-0.37	0	0	0	0.021843	-0.003076	0.017474	-0.003076	0	0
ENST00000305885	FEN1	P39748	ENSG00000168496	2237	1	9	-2.22	-0.34	9	-2.22	-0.34	0	0	0	0.012113	-0.002983	0.012113	-0.002983	0	0
ENST00000306010	MGMT	P16455	ENSG00000170430	4255	4	3	-0.89	-0.34	3	-0.89	-0.34	0	0	0	0.002962	-0.000882	0.002962	-0.000882	0	0
ENST00000306052	LRP8	Q14114	ENSG00000157193	7804	6	165	-21.44	-0.71	111	-21.44	-0.71	0	0	0	0.035431	-0.004604	0.023835	-0.004604	0	0
ENST00000306077	TMEM43	Q9BTV4	ENSG00000170876	79188	9	46	-6.02	-0.63	27	-6.02	-0.63	0	0	0	0.024377	-0.003189	0.014308	-0.003189	0	0
ENST00000306085	TRIM56	Q9BRZ2	ENSG00000169871	81844	1	20	-5.99	-0.69	17	-5.99	-0.69	0	0	0	0.002384	-0.000714	0.002026	-0.000714	0	0
ENST00000306156	PRKCE	Q02156	ENSG00000171132	5581	9	261	-38.29	-0.68	191	-38.29	-0.68	0	0	0	0.083869	-0.012302	0.061375	-0.012302	0	0
ENST00000306200	STX18	Q9P2W9	ENSG00000168818	53407	5	10	-2.72	-0.43	10	-2.72	-0.43	0	0	0	0.009355	-0.002545	0.009355	-0.002545	0	0
ENST00000306434	MAT2A	P31153	ENSG00000168906	4144	1	127	-23.91	-0.41	112	-23.91	-0.41	0	0	0	0.08405	-0.015821	0.074123	-0.015821	0	0
ENST00000306467	CEP120	Q8N960	ENSG00000168944	153241	6	14	-2.12	-0.5	9	-2.12	-0.5	0	0	0	0.008552	-0.001293	0.005498	-0.001293	0	0
ENST00000306749	FASN	P49327	ENSG00000169710	2194	4	21	-2.9	-0.53	13	-2.9	-0.53	0	0	0	0.02583	-0.003567	0.01599	-0.003567	0	0
ENST00000306869	DCXR	Q7Z4W1	ENSG00000169738	51181	3	2	-0.27	-0.14	2	-0.27	-0.14	0	0	0	0.019048	-0.002543	0.019048	-0.002543	0	0
ENST00000306999	ANKMY2	Q8IV38	ENSG00000106524	57037	7	7	-2.52	-0.58	5	-2.52	-0.58	0	0	0	0.007085	-0.002548	0.005061	-0.002548	0	0
ENST00000307102	MAP2K1	Q02750	ENSG00000169032	5604	1	125	-29.25	-0.67	99	-29.25	-0.67	0	0	0	0.073529	-0.017206	0.058235	-0.017206	0	0
ENST00000307116	P4HA1	P13674	ENSG00000122884	5033	1	77	-21.42	-0.63	59	-21.42	-0.63	0	0	0	0.076389	-0.021254	0.058532	-0.021254	0	0
ENST00000307227	SUCLG2	Q96I99	ENSG00000172340	8801	1	28	-8.5	-0.69	27	-8.5	-0.69	0	0	0	0.027237	-0.00827	0.026265	-0.00827	0	0
ENST00000307296	PDCD6IP	Q8WUM4	ENSG00000170248	10015	2	80	-10.74	-0.59	62	-10.74	-0.59	0	0	0	0.025157	-0.003378	0.019497	-0.003378	0	0
ENST00000307630	YWHAG	P61981	ENSG00000170027	7532	9	240	-45.66	-0.59	196	-45.66	-0.59	0	0	0	0.086145	-0.01639	0.070352	-0.01639	0	0
ENST00000307641	NKIRAS2	Q9NYR9	ENSG00000168256	28511	8	42	-7.4	-0.44	37	-7.4	-0.44	0	0	0	0.023945	-0.004219	0.021095	-0.004219	0	0
ENST00000307720	PPID	Q08752	ENSG00000171497	5481	4	5	-2.49	-0.6	5	-2.49	-0.6	0	0	0	0.008264	-0.004121	0.008264	-0.004121	0	0
ENST00000307741	THOP1	P52888	ENSG00000172009	7064	1	10	-2.43	-0.46	10	-2.43	-0.46	0	0	0	0.003946	-0.000961	0.003946	-0.000961	0	0
ENST00000307980	RAD9A	Q99638	ENSG00000172613	5883	4	32	-4.96	-0.66	26	-4.96	-0.66	0	0	0	0.037515	-0.005821	0.030481	-0.005821	0	0
ENST00000308025	DDX23	Q9BUQ8	ENSG00000174243	9416	5	2	-0.35	-0.18	2	-0.35	-0.18	0	0	0	0.002825	-0.000494	0.002825	-0.000494	0	0
ENST00000308249	PPM1E	Q8WY54	ENSG00000175175	22843	7	197	-28.34	-0.66	138	-28.34	-0.66	0	0	0	0.047493	-0.006831	0.033269	-0.006831	0	0
ENST00000308436	TUT1	Q9H6E5	ENSG00000149016	64852	1	8	-1.71	-0.26	8	-1.71	-0.26	0	0	0	0.153846	-0.032942	0.153846	-0.032942	0	0
ENST00000308448	ATAD1	Q8NBU5	ENSG00000138138	84896	9	90	-14.67	-0.67	60	-14.67	-0.67	0	0	0	0.02832	-0.004617	0.01888	-0.004617	0	0
ENST00000308482	LRRFIP1	Q32MZ4	ENSG00000124831	9208	1	77	-16.76	-0.68	63	-16.76	-0.68	0	0	0	0.097964	-0.021327	0.080153	-0.021327	0	0
ENST00000308497	STOX2	Q9P2F5	ENSG00000173320	56977	4	629	-60.61	-0.73	395	-60.61	-0.73	0	0	0	0.100721	-0.009705	0.063251	-0.009705	0	0
ENST00000308595	GRK2	P25098	ENSG00000173020	156	8	14	-1.6	-0.15	14	-1.6	-0.15	0	0	0	0.012624	-0.001445	0.012624	-0.001445	0	0
ENST00000308677	PRKACA	P17612	ENSG00000072062	5566	7	54	-7.9	-1.12	43	-7.9	-1.12	0	0	0	0.037842	-0.005538	0.030133	-0.005538	0	0
ENST00000308683	ZNF622	Q969S3	ENSG00000173545	90441	6	12	-6.95	-0.77	12	-6.95	-0.77	0	0	0	0.085106	-0.049284	0.085106	-0.049284	0	0
ENST00000308893	TAOK2	Q9UL54	ENSG00000149930	9344	8	27	-4.83	-0.39	27	-4.83	-0.39	0	0	0	0.064133	-0.011485	0.064133	-0.011485	0	0
ENST00000308987	CKS1B	P61024	ENSG00000173207	1163	1	30	-8.72	-0.99	20	-8.72	-0.99	0	0	0	0.063158	-0.018356	0.042105	-0.018356	0	0
ENST00000309060	ZHX3	Q9H4I2	ENSG00000174306	23051	2	194	-18.27	-0.43	107	-18.27	-0.43	0	0	0	0.028758	-0.002708	0.015861	-0.002708	0	0
ENST00000309083	PTMS	P20962	ENSG00000159335	5763	9	12	-3.99	-1.1	11	-3.99	-1.1	0	0	0	0.02381	-0.007921	0.021825	-0.007921	0	0
ENST00000309134	TMEM9B	Q9NQ34	ENSG00000175348	56674	8	27	-10.68	-0.8	24	-10.68	-0.8	0	0	0	0.026239	-0.010378	0.023324	-0.010378	0	0
ENST00000309415	SH3RF3	Q8TEJ3	ENSG00000172985	344558	6	68	-8.63	-0.65	52	-8.63	-0.65	0	0	0	0.022942	-0.002913	0.017544	-0.002913	0	0
ENST00000309660	PTPN2	P17706	ENSG00000175354	5771	9	21	-6.26	-0.57	15	-6.26	-0.57	0	0	0	0.009868	-0.002943	0.007049	-0.002943	0	0
ENST00000309733	FAM241A	Q8N8J7	ENSG00000174749	132720	9	109	-20.56	-1.14	59	-20.56	-1.14	0	0	0	0.013099	-0.002471	0.00709	-0.002471	0	0
ENST00000309859	GGA2	Q9UJY4	ENSG00000103365	23062	4	146	-26.58	-0.89	95	-26.58	-0.89	0	0	0	0.03604	-0.006563	0.023451	-0.006563	0	0
ENST00000309863	GCC2	Q8IWJ2	ENSG00000135968	9648	5	95	-12.9	-1.08	68	-12.9	-1.08	0	0	0	0.053642	-0.007283	0.038396	-0.007283	0	0
ENST00000309951	ACO1	P21399	ENSG00000122729	48	1	69	-9.12	-0.79	42	-9.12	-0.79	0	0	0	0.014804	-0.001956	0.009011	-0.001956	0	0
ENST00000309957	NAXD	Q8IW45	ENSG00000213995	55739	8	1	-0.53	-0.53	1	-0.53	-0.53	0	0	0	0.000678	-0.000356	0.000678	-0.000356	0	0
ENST00000309983	TPMT	P51580	ENSG00000137364	7172	1	2	-0.75	-0.39	2	-0.75	-0.39	0	0	0	0.000847	-0.000317	0.000847	-0.000317	0	0
ENST00000310015	SP3	Q02447	ENSG00000172845	6670	2	556	-67.52	-1.17	319	-67.52	-1.17	0	0	0	0.159541	-0.019375	0.091535	-0.019375	0	0
ENST00000310112	SNCB	Q16143	ENSG00000074317	6620	9	79	-20.23	-0.73	71	-20.23	-0.73	0	0	0	0.108219	-0.027716	0.09726	-0.027716	0	0
ENST00000310118	PSMD2	Q13200	ENSG00000175166	5708	9	9	-1.35	-0.52	9	-1.35	-0.52	0	0	0	0.053892	-0.008114	0.053892	-0.008114	0	0
ENST00000310227	INSM1	Q01101	ENSG00000173404	3642	2	73	-13.55	-0.49	63	-13.55	-0.49	0	0	0	0.063368	-0.011764	0.054688	-0.011764	0	0
ENST00000310301	VPS41	P49754	ENSG00000006715	27072	6	15	-3.67	-0.67	11	-3.67	-0.67	0	0	0	0.004565	-0.001115	0.003348	-0.001115	0	0
ENST00000310343	ARHGAP32	A7KAX9	ENSG00000134909	9743	9	100	-9.67	-0.7	58	-9.67	-0.7	0	0	0	0.025974	-0.002511	0.015065	-0.002511	0	0
ENST00000310421	VCPIP1	Q96JH7	ENSG00000175073	80124	9	223	-20.26	-0.66	127	-20.26	-0.66	0	0	0	0.037062	-0.003366	0.021107	-0.003366	0	0
ENST00000310447	CASP2	P42575	ENSG00000106144	835	5	79	-19.36	-0.83	62	-19.36	-0.83	0	0	0	0.030061	-0.007366	0.023592	-0.007366	0	0
ENST00000310574	SLC5A6	Q9Y289	ENSG00000138074	8884	4	17	-4.93	-0.42	16	-4.93	-0.42	0	0	0	0.019953	-0.005785	0.018779	-0.005785	0	0
ENST00000310803	RASGRP1	O95267	ENSG00000172575	10125	6	39	-7.91	-0.46	29	-7.91	-0.46	0	0	0	0.015892	-0.003225	0.011817	-0.003225	0	0
ENST00000310806	MIS18BP1	Q6P0N0	ENSG00000129534	55320	1	5	-0.91	-0.37	4	-0.91	-0.37	0	0	0	0.005423	-0.000983	0.004338	-0.000983	0	0
ENST00000310823	ADAM17	P78536	ENSG00000151694	6868	1	88	-15.01	-0.64	69	-15.01	-0.64	0	0	0	0.051948	-0.008861	0.040732	-0.008861	0	0
ENST00000310850	DTD2	Q96FN9	ENSG00000129480	112487	3	21	-3.81	-0.45	16	-3.81	-0.45	0	0	0	0.010019	-0.001817	0.007634	-0.001817	0	0
ENST00000310942	CBX2	Q14781	ENSG00000173894	84733	1	107	-18.88	-0.66	78	-18.88	-0.66	0	0	0	0.036345	-0.006413	0.026495	-0.006413	0	0
ENST00000310974	DPY19L1	Q2PZI1	ENSG00000173852	23333	6	118	-18.4	-0.61	81	-18.4	-0.61	0	0	0	0.043704	-0.006814	0.03	-0.006814	0	0
ENST00000310981	SFT2D3	Q587I9	ENSG00000173349	84826	3	38	-15.29	-1.6	29	-15.29	-1.6	0	0	0	0.012382	-0.004982	0.009449	-0.004982	0	0
ENST00000311083	CSRP2	Q16527	ENSG00000175183	1466	9	23	-10.37	-0.7	23	-10.37	-0.7	0	0	0	0.095833	-0.043217	0.095833	-0.043217	0	0
ENST00000311111	RPL38	P63173	ENSG00000172809	6169	3	3	-1.78	-0.75	3	-1.78	-0.75	0	0	0	0.003619	-0.002151	0.003619	-0.002151	0	0
ENST00000311151	DPYSL2	Q16555	ENSG00000092964	1808	9	136	-18.33	-0.53	104	-18.33	-0.53	0	0	0	0.054949	-0.007407	0.04202	-0.007407	0	0
ENST00000311181	B4GAT1	O43505	ENSG00000174684	11041	7	75	-22.16	-0.64	61	-22.16	-0.64	0	0	0	0.110294	-0.032582	0.089706	-0.032582	0	0
ENST00000311191	LRCH1	Q9Y2L9	ENSG00000136141	23143	9	150	-28.84	-0.54	121	-28.84	-0.54	0	0	0	0.062683	-0.012053	0.050564	-0.012053	0	0
ENST00000311212	ZNF706	Q9Y5V0	ENSG00000120963	51123	5	88	-21.55	-0.71	62	-21.55	-0.71	0	0	0	0.039946	-0.009783	0.028143	-0.009783	0	0
ENST00000311277	MAP9	Q49MG5	ENSG00000164114	79884	4	50	-5.41	-0.58	24	-5.41	-0.58	0	0	0	0.00975	-0.001055	0.00468	-0.001055	0	0
ENST00000311337	GNPDA1	P46926	ENSG00000113552	10007	1	26	-7.63	-0.47	25	-7.63	-0.47	0	0	0	0.019076	-0.005596	0.018342	-0.005596	0	0
ENST00000311380	ARHGAP12	Q8IWW6	ENSG00000165322	94134	1	133	-29.81	-0.81	112	-29.81	-0.81	0	0	0	0.059802	-0.013403	0.05036	-0.013403	0	0
ENST00000311601	SH3PXD2B	A1X283	ENSG00000174705	285590	3	115	-10.96	-0.5	68	-10.96	-0.5	0	0	0	0.023599	-0.002249	0.013954	-0.002249	0	0
ENST00000311637	ATP9A	O75110	ENSG00000054793	10079	9	69	-4.88	-0.38	39	-4.88	-0.38	0	0	0	0.014681	-0.001039	0.008298	-0.001039	0	0
ENST00000311806	OXSR1	O95747	ENSG00000172939	9943	9	200	-30.72	-0.81	139	-30.72	-0.81	0	0	0	0.076923	-0.011815	0.053462	-0.011815	0	0
ENST00000311956	ARHGAP1	Q07960	ENSG00000175220	392	8	81	-20.11	-0.69	68	-20.11	-0.69	0	0	0	0.041327	-0.010263	0.034694	-0.010263	0	0
ENST00000312046	OXR1	Q8N573	ENSG00000164830	55074	1	123	-22.52	-0.56	94	-22.52	-0.56	0	0	0	0.070046	-0.012822	0.053531	-0.012822	0	0
ENST00000312239	HP1BP3	Q5SSJ5	ENSG00000127483	50809	3	99	-17.43	-0.49	85	-17.43	-0.49	0	0	0	0.046283	-0.00815	0.039738	-0.00815	0	0
ENST00000312352	PFKM	P08237	ENSG00000152556	5213	9	92	-15.22	-0.59	64	-15.22	-0.59	0	0	0	0.131617	-0.021774	0.091559	-0.021774	0	0
ENST00000312358	SPEG	Q15772	ENSG00000072195	10290	8	37	-6.97	-0.6	37	-6.97	-0.6	0	0	0	0.043581	-0.008213	0.043581	-0.008213	0	0
ENST00000312431	DST	Q03001	ENSG00000151914	667	4	640	-40.32	-5.1	246	-40.32	-5.1	0	0	0	0.628067	-0.039564	0.241413	-0.039564	0	0
ENST00000312962	KRI1	Q8N9T8	ENSG00000129347	65095	1	2	-0.33	-0.16	2	-0.33	-0.16	0	0	0	0.002283	-0.000371	0.002283	-0.000371	0	0
ENST00000312989	PPP1CA	P62136	ENSG00000172531	5499	4	19	-5.57	-0.56	14	-5.57	-0.56	0	0	0	0.053521	-0.015682	0.039437	-0.015682	0	0
ENST00000312990	CDK4	P11802	ENSG00000135446	1019	1	42	-10.12	-0.67	39	-10.12	-0.67	0	0	0	0.040976	-0.00987	0.038049	-0.00987	0	0
ENST00000313010	PRCP	P42785	ENSG00000137509	5547	3	40	-7.53	-0.78	27	-7.53	-0.78	0	0	0	0.028429	-0.00535	0.01919	-0.00535	0	0
ENST00000313050	SEC16A	O15027	ENSG00000148396	9919	6	31	-5.6	-0.34	28	-5.6	-0.34	0	0	0	0.018663	-0.003374	0.016857	-0.003374	0	0
ENST00000313219	CHMP7	Q8WUX9	ENSG00000147457	91782	8	68	-15.75	-0.51	64	-15.75	-0.51	0	0	0	0.048468	-0.011225	0.045617	-0.011225	0	0
ENST00000313285	TRIP10	Q15642	ENSG00000125733	9322	1	30	-6.88	-0.43	30	-6.88	-0.43	0	0	0	0.09434	-0.021638	0.09434	-0.021638	0	0
ENST00000313408	NDUFS7	O75251	ENSG00000115286	374291	9	3	-0.45	-0.28	2	-0.45	-0.28	0	0	0	0.001378	-0.000205	0.000919	-0.000205	0	0
ENST00000313519	SUV39H2	Q9H5I1	ENSG00000152455	79723	1	99	-16.54	-0.55	57	-16.54	-0.55	0	0	0	0.054817	-0.009157	0.031561	-0.009157	0	0
ENST00000313601	GNAI2	P04899	ENSG00000114353	2771	1	74	-16.15	-0.62	66	-16.15	-0.62	0	0	0	0.072906	-0.015911	0.065025	-0.015911	0	0
ENST00000313683	PNMA8A	Q86V59	ENSG00000182013	55228	7	6	-0.43	-0.14	4	-0.43	-0.14	0	0	0	0.002904	-0.000208	0.001936	-0.000208	0	0
ENST00000313860	LIMCH1	Q9UPQ0	ENSG00000064042	22998	9	136	-27.05	-0.96	111	-27.05	-0.96	0	0	0	0.047519	-0.009452	0.038784	-0.009452	0	0
ENST00000313899	HNRNPD	Q14103	ENSG00000138668	3184	3	63	-15.93	-0.6	56	-15.93	-0.6	0	0	0	0.037278	-0.009427	0.033136	-0.009427	0	0
ENST00000314045	DDX54	Q8TDD1	ENSG00000123064	79039	1	12	-1.43	-0.37	7	-1.43	-0.37	0	0	0	0.007034	-0.000836	0.004103	-0.000836	0	0
ENST00000314073	BICRAL	Q6AI39	ENSG00000112624	23506	9	130	-18.74	-0.41	115	-18.74	-0.41	0	0	0	0.041707	-0.006012	0.036894	-0.006012	0	0
ENST00000314103	CHAF1B	Q13112	ENSG00000159259	8208	1	5	-0.85	-0.35	3	-0.85	-0.35	0	0	0	0.001885	-0.000322	0.001131	-0.000322	0	0
ENST00000314355	CKS2	P33552	ENSG00000123975	1164	1	3	-1.86	-0.64	3	-1.86	-0.64	0	0	0	0.010676	-0.006626	0.010676	-0.006626	0	0
ENST00000314358	KDM3B	Q7LBC6	ENSG00000120733	51780	1	79	-11.74	-0.67	75	-11.74	-0.67	0	0	0	0.059398	-0.008827	0.056391	-0.008827	0	0
ENST00000314393	ZHX2	Q9Y6X8	ENSG00000178764	22882	2	64	-17	-0.75	55	-17	-0.75	0	0	0	0.050078	-0.013301	0.043036	-0.013301	0	0
ENST00000314666	PFAS	O15067	ENSG00000178921	5198	1	12	-2.44	-0.61	12	-2.44	-0.61	0	0	0	0.009804	-0.001992	0.009804	-0.001992	0	0
ENST00000314797	COPG1	Q9Y678	ENSG00000181789	22820	9	8	-2.43	-0.4	8	-2.43	-0.4	0	0	0	0.022727	-0.006898	0.022727	-0.006898	0	0
ENST00000314888	TLN1	Q9Y490	ENSG00000137076	7094	2	164	-15.31	-0.73	132	-15.31	-0.73	0	0	0	0.193853	-0.018091	0.156028	-0.018091	0	0
ENST00000315082	RHOT2	Q8IXI1	ENSG00000140983	89941	5	14	-2.63	-0.67	7	-2.63	-0.67	0	0	0	0.024518	-0.004606	0.012259	-0.004606	0	0
ENST00000315273	ASAP2	O43150	ENSG00000151693	8853	4	64	-10.51	-0.4	46	-10.51	-0.4	0	0	0	0.02713	-0.004457	0.0195	-0.004457	0	0
ENST00000315491	TUBB3	Q13509	ENSG00000258947	10381	9	8	-1.66	-0.3	8	-1.66	-0.3	0	0	0	0.027027	-0.005608	0.027027	-0.005608	0	0
ENST00000315596	PDS5B	Q9NTI5	ENSG00000083642	23047	4	213	-19.98	-0.56	131	-19.98	-0.56	0	0	0	0.071717	-0.006726	0.044108	-0.006726	0	0
ENST00000315758	MDH2	P40926	ENSG00000146701	4191	7	7	-1.89	-0.35	7	-1.89	-0.35	0	0	0	0.006358	-0.001718	0.006358	-0.001718	0	0
ENST00000315930	FGF13	Q92913	ENSG00000129682	2258	7	23	-3.61	-0.34	21	-3.61	-0.34	0	0	0	0.001269	-0.000199	0.001159	-0.000199	0	0
ENST00000315939	WNK1	Q9H4A3	ENSG00000060237	65125	5	180	-27.85	-0.54	149	-27.85	-0.54	0	0	0	0.067593	-0.010456	0.055952	-0.010456	0	0
ENST00000316059	ZFP91	Q96JP5	ENSG00000186660	80829	2	337	-39.34	-0.8	202	-39.34	-0.8	0	0	0	0.100928	-0.011783	0.060497	-0.011783	0	0
ENST00000316156	MAP7D1	Q3KQU3	ENSG00000116871	55700	9	71	-18.62	-0.75	60	-18.62	-0.75	0	0	0	0.119529	-0.03134	0.10101	-0.03134	0	0
ENST00000316292	EEF1A1	P68104	ENSG00000156508	1915	3	75	-15.26	-0.55	62	-15.26	-0.55	0	0	0	0.036355	-0.007399	0.030053	-0.007399	0	0
ENST00000316399	SOX6	P35712	ENSG00000110693	55553	1	743	-72.4	-0.88	498	-72.4	-0.88	0	0	0	0.116769	-0.011377	0.078265	-0.011377	0	0
ENST00000316403	CLU	P10909	ENSG00000120885	1191	1	25	-2.59	-0.63	19	-2.59	-0.63	0	0	0	0.018839	-0.001953	0.014318	-0.001953	0	0
ENST00000316423	UGDH	O60701	ENSG00000109814	7358	1	19	-3.36	-0.52	14	-3.36	-0.52	0	0	0	0.013659	-0.002413	0.010065	-0.002413	0	0
ENST00000316594	HNRNPH2	P55795	ENSG00000126945	3188	7	19	-6.56	-0.71	17	-6.56	-0.71	0	0	0	0.02381	-0.008222	0.021303	-0.008222	0	0
ENST00000316610	MBLAC2	Q68D91	ENSG00000176055	153364	9	144	-22.98	-0.62	95	-22.98	-0.62	0	0	0	0.048534	-0.007745	0.032019	-0.007745	0	0
ENST00000316694	SHMT1	P34896	ENSG00000176974	6470	1	66	-7.09	-0.72	39	-7.09	-0.72	0	0	0	0.075	-0.008061	0.044318	-0.008061	0	0
ENST00000316843	LLGL1	Q15334	ENSG00000131899	3996	1	12	-0.6	-0.17	12	-0.6	-0.17	0	0	0	0.012346	-0.000616	0.012346	-0.000616	0	0
ENST00000316851	NCAM1	P13591	ENSG00000149294	4684	9	111	-12.43	-0.46	89	-12.43	-0.46	0	0	0	0.03637	-0.004071	0.029161	-0.004071	0	0
ENST00000316881	TRIM25	Q14258	ENSG00000121060	7706	1	11	-0.62	-0.19	9	-0.62	-0.19	0	0	0	0.002899	-0.000163	0.002372	-0.000163	0	0
ENST00000316924	KLC2	Q9H0B6	ENSG00000174996	64837	9	91	-14.93	-0.6	76	-14.93	-0.6	0	0	0	0.100331	-0.016465	0.083793	-0.016465	0	0
ENST00000316963	LYPLA1	O75608	ENSG00000120992	10434	4	50	-17.41	-0.95	35	-17.41	-0.95	0	0	0	0.029394	-0.010233	0.020576	-0.010233	0	0
ENST00000317025	NSD3	Q9BZ95	ENSG00000147548	54904	7	123	-11.2	-0.53	82	-11.2	-0.53	0	0	0	0.020683	-0.001884	0.013788	-0.001884	0	0
ENST00000317135	LRCH2	Q5VUJ6	ENSG00000130224	57631	8	157	-22.99	-0.92	94	-22.99	-0.92	0	0	0	0.060315	-0.008833	0.036112	-0.008833	0	0
ENST00000317173	MSRA	Q9UJ68	ENSG00000175806	4482	5	8	-3.1	-0.57	8	-3.1	-0.57	0	0	0	0.013746	-0.005318	0.013746	-0.005318	0	0
ENST00000317204	TOLLIP	Q9H0E2	ENSG00000078902	54472	9	15	-4.43	-0.57	13	-4.43	-0.57	0	0	0	0.005616	-0.001657	0.004867	-0.001657	0	0
ENST00000317357	SOBP	A7XYQ1	ENSG00000112320	55084	8	283	-55.45	-0.88	229	-55.45	-0.88	0	0	0	0.143874	-0.028191	0.116421	-0.028191	0	0
ENST00000317635	TMEM11	P17152	ENSG00000178307	8834	8	46	-6.14	-0.59	31	-6.14	-0.59	0	0	0	0.043935	-0.005868	0.029608	-0.005868	0	0
ENST00000317799	HADHB	P55084	ENSG00000138029	3032	1	15	-3.39	-0.31	15	-3.39	-0.31	0	0	0	0.028958	-0.006552	0.028958	-0.006552	0	0
ENST00000317881	SLC25A5	P05141	ENSG00000005022	292	3	6	-2.91	-0.51	6	-2.91	-0.51	0	0	0	0.022727	-0.011038	0.022727	-0.011038	0	0
ENST00000318003	CC2D1A	Q6P1N0	ENSG00000132024	54862	5	42	-10.32	-0.7	42	-10.32	-0.7	0	0	0	0.086242	-0.021193	0.086242	-0.021193	0	0
ENST00000318006	VPS39	Q96JC1	ENSG00000166887	23339	8	43	-5.22	-0.35	29	-5.22	-0.35	0	0	0	0.020914	-0.002538	0.014105	-0.002538	0	0
ENST00000318008	LASP1	Q14847	ENSG00000002834	3927	9	171	-32.24	-1.34	121	-32.24	-1.34	0	0	0	0.057095	-0.010766	0.040401	-0.010766	0	0
ENST00000318129	GINS3	Q9BRX5	ENSG00000181938	64785	1	9	-2.37	-0.58	7	-2.37	-0.58	0	0	0	0.006347	-0.001673	0.004937	-0.001673	0	0
ENST00000318158	GRHPR	Q9UBQ7	ENSG00000137106	9380	3	45	-6.8	-0.66	31	-6.8	-0.66	0	0	0	0.21327	-0.032251	0.146919	-0.032251	0	0
ENST00000318348	GLTP	Q9NZD2	ENSG00000139433	51228	1	61	-19.12	-0.67	58	-19.12	-0.67	0	0	0	0.037771	-0.011837	0.035913	-0.011837	0	0
ENST00000318522	EML4	Q9HC35	ENSG00000143924	27436	3	106	-21.7	-0.48	97	-21.7	-0.48	0	0	0	0.045222	-0.009256	0.041382	-0.009256	0	0
ENST00000318622	RHBDD2	Q6NTF9	ENSG00000005486	57414	7	5	-0.6	-0.15	5	-0.6	-0.15	0	0	0	0.008621	-0.001034	0.008621	-0.001034	0	0
ENST00000318709	AVL9	Q8NBF6	ENSG00000105778	23080	9	181	-23.85	-0.85	118	-23.85	-0.85	0	0	0	0.037575	-0.004952	0.024497	-0.004952	0	0
ENST00000318876	ZFYVE1	Q9HBF4	ENSG00000165861	53349	8	51	-8.1	-0.57	37	-8.1	-0.57	0	0	0	0.03559	-0.005655	0.02582	-0.005655	0	0
ENST00000318906	C1orf131	Q8NDD1	ENSG00000143633	128061	5	26	-5.05	-0.4	24	-5.05	-0.4	0	0	0	0.015231	-0.002956	0.01406	-0.002956	0	0
ENST00000318950	SWAP70	Q9UH65	ENSG00000133789	23075	1	63	-7.25	-0.92	51	-7.25	-0.92	0	0	0	0.020833	-0.002397	0.016865	-0.002397	0	0
ENST00000318967	INTS3	Q68E01	ENSG00000143624	65123	2	22	-2.43	-0.4	12	-2.43	-0.4	0	0	0	0.014276	-0.001578	0.007787	-0.001578	0	0
ENST00000319170	RAPH1	Q70E73	ENSG00000173166	65059	6	113	-12.51	-0.69	76	-12.51	-0.69	0	0	0	0.019625	-0.002172	0.013199	-0.002172	0	0
ENST00000319217	MPDZ	O75970	ENSG00000107186	8777	1	20	-0.82	-0.15	13	-0.82	-0.15	0	0	0	0.015823	-0.000649	0.010285	-0.000649	0	0
ENST00000319285	DCTPP1	Q9H773	ENSG00000179958	79077	4	1	-0.49	-0.49	1	-0.49	-0.49	0	0	0	0.001621	-0.000793	0.001621	-0.000793	0	0
ENST00000319380	UBE2O	Q9C0C9	ENSG00000175931	63893	9	89	-8.14	-0.28	77	-8.14	-0.28	0	0	0	0.059532	-0.005447	0.051505	-0.005447	0	0
ENST00000319481	OSBPL1A	Q9BXW6	ENSG00000141447	114876	1	75	-11.26	-1.04	59	-11.26	-1.04	0	0	0	0.065905	-0.009898	0.051845	-0.009898	0	0
ENST00000319540	SCD5	Q86SK9	ENSG00000145284	79966	9	55	-11.36	-0.62	40	-11.36	-0.62	0	0	0	0.030709	-0.006343	0.022334	-0.006343	0	0
ENST00000319550	NT5DC1	Q5TFE4	ENSG00000178425	221294	1	53	-10.79	-0.69	38	-10.79	-0.69	0	0	0	0.009679	-0.00197	0.006939	-0.00197	0	0
ENST00000319622	PKM	P14618	ENSG00000067225	5315	1	10	-2.92	-0.54	8	-2.92	-0.54	0	0	0	0.016026	-0.004679	0.012821	-0.004679	0	0
ENST00000319715	RBBP6	Q7Z6E9	ENSG00000122257	5930	6	75	-16.63	-0.41	74	-16.63	-0.41	0	0	0	0.178147	-0.039513	0.175772	-0.039513	0	0
ENST00000319725	FUBP3	Q96I24	ENSG00000107164	8939	2	140	-28.82	-0.59	130	-28.82	-0.59	0	0	0	0.105026	-0.021618	0.097524	-0.021618	0	0
ENST00000319778	EPC1	Q9H2F5	ENSG00000120616	80314	8	280	-52.62	-0.6	266	-52.62	-0.6	0	0	0	0.212928	-0.040016	0.202281	-0.040016	0	0
ENST00000319974	C2orf69	Q8N8R5	ENSG00000178074	205327	9	138	-23.66	-1.1	102	-23.66	-1.1	0	0	0	0.057741	-0.009899	0.042678	-0.009899	0	0
ENST00000320230	SLC25A22	Q9H936	ENSG00000177542	79751	9	52	-12.86	-0.89	38	-12.86	-0.89	0	0	0	0.036036	-0.00891	0.026334	-0.00891	0	0
ENST00000320248	KBTBD11	O94819	ENSG00000176595	9920	9	25	-3.42	-0.52	15	-3.42	-0.52	0	0	0	0.006452	-0.000881	0.003871	-0.000881	0	0
ENST00000320270	RRS1	Q15050	ENSG00000179041	23212	1	2	-0.9	-0.45	2	-0.9	-0.45	0	0	0	0.003945	-0.001767	0.003945	-0.001767	0	0
ENST00000320560	ANO6	Q4KMQ2	ENSG00000177119	196527	1	130	-12.27	-0.42	80	-12.27	-0.42	0	0	0	0.042721	-0.004033	0.02629	-0.004033	0	0
ENST00000320574	POLE	Q07864	ENSG00000177084	5426	5	7	-0.87	-0.16	7	-0.87	-0.16	0	0	0	0.007463	-0.000931	0.007463	-0.000931	0	0
ENST00000320580	PACS1	Q6VY07	ENSG00000175115	55690	9	114	-11.86	-0.95	57	-11.86	-0.95	0	0	0	0.077551	-0.00807	0.038776	-0.00807	0	0
ENST00000320672	SSBP2	P81877	ENSG00000145687	23635	7	280	-29.47	-0.78	138	-29.47	-0.78	0	0	0	0.037403	-0.003937	0.018434	-0.003937	0	0
ENST00000320849	AAR2	Q9Y312	ENSG00000131043	25980	5	19	-5.26	-0.77	14	-5.26	-0.77	0	0	0	0.015953	-0.00442	0.011755	-0.00442	0	0
ENST00000320876	SMCHD1	A6NHR9	ENSG00000101596	23347	1	87	-8.2	-0.41	62	-8.2	-0.41	0	0	0	0.035251	-0.003322	0.025122	-0.003322	0	0
ENST00000320954	CRTAP	O75718	ENSG00000170275	10491	1	113	-13.21	-0.62	69	-13.21	-0.62	0	0	0	0.021209	-0.002478	0.01295	-0.002478	0	0
ENST00000321037	ENPP4	Q9Y6X5	ENSG00000001561	22875	7	36	-10.18	-0.63	25	-10.18	-0.63	0	0	0	0.011757	-0.003323	0.008165	-0.003323	0	0
ENST00000321063	PLXNA4	Q9HCM2	ENSG00000221866	91584	6	344	-22.17	-0.58	197	-22.17	-0.58	0	0	0	0.048112	-0.003101	0.027552	-0.003101	0	0
ENST00000321196	TMTC2	Q8N394	ENSG00000179104	160335	2	49	-8.2	-0.4	41	-8.2	-0.4	0	0	0	0.01987	-0.003325	0.016626	-0.003325	0	0
ENST00000321356	CLK1	P49759	ENSG00000013441	1195	8	5	-2.63	-0.68	5	-2.63	-0.68	0	0	0	0.016667	-0.008763	0.016667	-0.008763	0	0
ENST00000321358	YBX1	P67809	ENSG00000065978	4904	7	92	-21.78	-0.78	80	-21.78	-0.78	0	0	0	0.228288	-0.054042	0.198511	-0.054042	0	0
ENST00000321394	TCP1	P17987	ENSG00000120438	6950	9	3	-1.01	-0.39	3	-1.01	-0.39	0	0	0	0.005455	-0.001838	0.005455	-0.001838	0	0
ENST00000321437	RAB8B	Q92930	ENSG00000166128	51762	1	199	-38.81	-0.79	132	-38.81	-0.79	0	0	0	0.047768	-0.009316	0.031685	-0.009316	0	0
ENST00000321442	SFXN1	Q9H9B4	ENSG00000164466	94081	7	65	-14.18	-0.6	56	-14.18	-0.6	0	0	0	0.021588	-0.004708	0.018598	-0.004708	0	0
ENST00000321562	FKBP10	Q96AY3	ENSG00000141756	60681	1	5	-1.56	-0.54	5	-1.56	-0.54	0	0	0	0.006158	-0.001927	0.006158	-0.001927	0	0
ENST00000321599	IP6K1	Q92551	ENSG00000176095	9807	9	135	-16.02	-1.13	90	-16.02	-1.13	0	0	0	0.047686	-0.005658	0.031791	-0.005658	0	0
ENST00000321612	GLDC	P23378	ENSG00000178445	2731	3	15	-4.65	-0.4	15	-4.65	-0.4	0	0	0	0.026978	-0.008356	0.026978	-0.008356	0	0
ENST00000321613	PHYHIP	Q92561	ENSG00000168490	9796	9	22	-2.71	-0.27	16	-2.71	-0.27	0	0	0	0.013317	-0.001638	0.009685	-0.001638	0	0
ENST00000321870	BHLHE22	Q8NFJ8	ENSG00000180828	27319	6	61	-20.7	-0.85	58	-20.7	-0.85	0	0	0	0.035988	-0.012211	0.034218	-0.012211	0	0
ENST00000321892	BPTF	Q12830	ENSG00000171634	2186	5	218	-19.72	-0.59	156	-19.72	-0.59	0	0	0	0.104157	-0.00942	0.074534	-0.00942	0	0
ENST00000321945	ABRAXAS1	Q6UWZ7	ENSG00000163322	84142	1	18	-1.04	-0.12	18	-1.04	-0.12	0	0	0	0.006091	-0.000351	0.006091	-0.000351	0	0
ENST00000322002	SOX11	P35716	ENSG00000176887	6664	6	436	-71.73	-0.91	285	-71.73	-0.91	0	0	0	0.059392	-0.009772	0.038823	-0.009772	0	0
ENST00000322048	ROGDI	Q9GZN7	ENSG00000067836	79641	9	1	-0.21	-0.21	1	-0.21	-0.21	0	0	0	0.00202	-0.000434	0.00202	-0.000434	0	0
ENST00000322090	NIPSNAP2	O75323	ENSG00000146729	2631	1	4	-1.04	-0.28	4	-1.04	-0.28	0	0	0	0.003597	-0.000933	0.003597	-0.000933	0	0
ENST00000322157	NPEPPS	P55786	ENSG00000141279	9520	9	201	-29.38	-0.57	157	-29.38	-0.57	0	0	0	0.147903	-0.021619	0.115526	-0.021619	0	0
ENST00000322177	RPP25	Q9BUL9	ENSG00000178718	54913	8	60	-8.21	-0.61	45	-8.21	-0.61	0	0	0	0.038192	-0.005227	0.028644	-0.005227	0	0
ENST00000322213	SMC1A	Q14683	ENSG00000072501	8243	1	237	-17.97	-0.95	107	-17.97	-0.95	0	0	0	0.039785	-0.003017	0.017962	-0.003017	0	0
ENST00000322310	SSNA1	O43805	ENSG00000176101	8636	4	2	-0.62	-0.33	2	-0.62	-0.33	0	0	0	0.004357	-0.001362	0.004357	-0.001362	0	0
ENST00000322313	WDR33	Q9C0J8	ENSG00000136709	55339	5	25	-3.32	-0.39	21	-3.32	-0.39	0	0	0	0.004713	-0.000625	0.003959	-0.000625	0	0
ENST00000322342	ZADH2	Q8N4Q0	ENSG00000180011	284273	1	392	-52.23	-1.01	251	-52.23	-1.01	0	0	0	0.062114	-0.008275	0.039772	-0.008275	0	0
ENST00000322347	COX5A	P20674	ENSG00000178741	9377	7	10	-6.19	-0.86	10	-6.19	-0.86	0	0	0	0.01506	-0.009321	0.01506	-0.009321	0	0
ENST00000322396	PRMT9	Q6P2P2	ENSG00000164169	90826	5	7	-1.35	-0.3	7	-1.35	-0.3	0	0	0	0.009333	-0.001799	0.009333	-0.001799	0	0
ENST00000322522	INPP1	P49441	ENSG00000151689	3628	8	5	-2.43	-0.56	5	-2.43	-0.56	0	0	0	0.018797	-0.009143	0.018797	-0.009143	0	0
ENST00000322611	BASP1	P80723	ENSG00000176788	10409	9	57	-13.47	-0.58	47	-13.47	-0.58	0	0	0	0.060832	-0.014379	0.05016	-0.014379	0	0
ENST00000322652	SUZ12	Q15022	ENSG00000178691	23512	1	177	-28.39	-0.61	148	-28.39	-0.61	0	0	0	0.086553	-0.013883	0.072372	-0.013883	0	0
ENST00000322716	EPM2AIP1	Q7L775	ENSG00000178567	9852	9	64	-7.1	-0.51	36	-7.1	-0.51	0	0	0	0.010299	-0.001143	0.005793	-0.001143	0	0
ENST00000322723	NCL	P19338	ENSG00000115053	4691	1	53	-15.76	-0.63	51	-15.76	-0.63	0	0	0	0.03187	-0.009476	0.030667	-0.009476	0	0
ENST00000322764	ZYX	Q15942	ENSG00000159840	7791	5	15	-3.22	-0.61	11	-3.22	-0.61	0	0	0	0.034722	-0.007461	0.025463	-0.007461	0	0
ENST00000322897	NAPG	Q99747	ENSG00000134265	8774	9	29	-7.56	-0.81	21	-7.56	-0.81	0	0	0	0.011404	-0.002972	0.008258	-0.002972	0	0
ENST00000323061	NAP1L5	Q96NT1	ENSG00000177432	266812	7	89	-29.58	-1.1	77	-29.58	-1.1	0	0	0	0.068779	-0.022859	0.059505	-0.022859	0	0
ENST00000323274	TYMS	P04818	ENSG00000176890	7298	1	9	-2.83	-0.53	8	-2.83	-0.53	0	0	0	0.015411	-0.004841	0.013699	-0.004841	0	0
ENST00000323469	DIRAS1	O95057	ENSG00000176490	148252	8	101	-18.01	-0.79	75	-18.01	-0.79	0	0	0	0.038171	-0.006806	0.028345	-0.006806	0	0
ENST00000323482	ACSS1	Q9NUB1	ENSG00000154930	84532	1	11	-2.3	-0.45	11	-2.3	-0.45	0	0	0	0.007175	-0.001499	0.007175	-0.001499	0	0
ENST00000323534	RAP2B	P61225	ENSG00000181467	5912	5	383	-57.94	-1	221	-57.94	-1	0	0	0	0.051911	-0.007853	0.029954	-0.007853	0	0
ENST00000323571	WIPF2	Q8TF74	ENSG00000171475	147179	5	284	-38.25	-0.89	195	-38.25	-0.89	0	0	0	0.048022	-0.006467	0.032973	-0.006467	0	0
ENST00000323668	TCOF1	Q13428	ENSG00000070814	6949	7	3	-0.79	-0.28	3	-0.79	-0.28	0	0	0	0.005725	-0.001513	0.005725	-0.001513	0	0
ENST00000323786	COG4	Q9H9E3	ENSG00000103051	25839	3	8	-3.02	-0.66	6	-3.02	-0.66	0	0	0	0.018018	-0.006804	0.013514	-0.006804	0	0
ENST00000323798	GYS1	P13807	ENSG00000104812	2997	4	8	-2.08	-0.96	3	-2.08	-0.96	0	0	0	0.006861	-0.00178	0.002573	-0.00178	0	0
ENST00000323848	SRRM1	Q8IYB3	ENSG00000133226	10250	2	25	-4.75	-0.53	24	-4.75	-0.53	0	0	0	0.025407	-0.004827	0.02439	-0.004827	0	0
ENST00000323851	NDRG1	Q92597	ENSG00000104419	10397	9	39	-7.78	-0.61	36	-7.78	-0.61	0	0	0	0.022807	-0.004551	0.021053	-0.004551	0	0
ENST00000323929	MRE11	P49959	ENSG00000020922	4361	1	65	-7.2	-0.51	38	-7.2	-0.51	0	0	0	0.014286	-0.001582	0.008352	-0.001582	0	0
ENST00000323959	CSTF3	Q12996	ENSG00000176102	1479	5	30	-5.82	-0.28	30	-5.82	-0.28	0	0	0	0.059289	-0.01151	0.059289	-0.01151	0	0
ENST00000323963	EIF4A2	Q14240	ENSG00000156976	1974	9	81	-21.19	-0.42	81	-21.19	-0.42	0	0	0	0.12776	-0.033423	0.12776	-0.033423	0	0
ENST00000324068	CAPN6	Q9Y6Q1	ENSG00000077274	827	4	102	-16.66	-0.5	82	-16.66	-0.5	0	0	0	0.069059	-0.011283	0.055518	-0.011283	0	0
ENST00000324109	DNMBP	Q6XZF7	ENSG00000107554	23268	1	8	-0.22	-0.1	6	-0.22	-0.1	0	0	0	0.005073	-0.000142	0.003805	-0.000142	0	0
ENST00000324324	MYEF2	Q9P2K5	ENSG00000104177	50804	6	173	-33.65	-0.91	117	-33.65	-0.91	0	0	0	0.020894	-0.004064	0.01413	-0.004064	0	0
ENST00000324344	DCUN1D3	Q8IWE4	ENSG00000188215	123879	9	447	-62.71	-0.83	297	-62.71	-0.83	0	0	0	0.090048	-0.012634	0.059831	-0.012634	0	0
ENST00000324379	PPIE	Q9UNP9	ENSG00000084072	10450	1	8	-1.02	-0.29	4	-1.02	-0.29	0	0	0	0.022535	-0.002885	0.011268	-0.002885	0	0
ENST00000324453	MTURN	Q8N3F0	ENSG00000180354	222166	8	177	-32.57	-0.85	108	-32.57	-0.85	0	0	0	0.033928	-0.006243	0.020702	-0.006243	0	0
ENST00000324765	DIAPH2	O60879	ENSG00000147202	1730	1	241	-21.98	-0.7	163	-21.98	-0.7	0	0	0	0.042407	-0.003868	0.028682	-0.003868	0	0
ENST00000324822	PLSCR3	Q9NRY6	ENSG00000187838	57048	8	27	-9.74	-0.58	27	-9.74	-0.58	0	0	0	0.040847	-0.014732	0.040847	-0.014732	0	0
ENST00000324856	ARID1A	O14497	ENSG00000117713	8289	1	192	-22.35	-0.44	170	-22.35	-0.44	0	0	0	0.141489	-0.016468	0.125276	-0.016468	0	0
ENST00000324989	CRMP1	Q14194	ENSG00000072832	1400	9	54	-10.23	-0.64	45	-10.23	-0.64	0	0	0	0.054054	-0.010241	0.045045	-0.010241	0	0
ENST00000325110	HMGCS1	Q01581	ENSG00000112972	3157	4	163	-27.71	-0.84	118	-27.71	-0.84	0	0	0	0.093732	-0.015934	0.067855	-0.015934	0	0
ENST00000325222	CUL1	Q13616	ENSG00000055130	8454	3	17	-3.87	-0.73	13	-3.87	-0.73	0	0	0	0.037199	-0.00846	0.028446	-0.00846	0	0
ENST00000325404	SOX2	P48431	ENSG00000181449	6657	1	47	-9.69	-0.4	40	-9.69	-0.4	0	0	0	0.041778	-0.008612	0.035556	-0.008612	0	0
ENST00000325418	HASPIN	Q8TF76	ENSG00000177602	83903	1	11	-0.78	-0.29	6	-0.78	-0.29	0	0	0	0.02973	-0.002108	0.016216	-0.002108	0	0
ENST00000325590	AMPH	P49418	ENSG00000078053	273	7	24	-5.76	-0.46	21	-5.76	-0.46	0	0	0	0.021486	-0.005155	0.0188	-0.005155	0	0
ENST00000325617	CLGN	O14967	ENSG00000153132	1047	1	29	-5.87	-0.64	23	-5.87	-0.64	0	0	0	0.037565	-0.007597	0.029793	-0.007597	0	0
ENST00000325722	KIAA0319L	Q8IZA0	ENSG00000142687	79932	7	63	-10.92	-0.59	53	-10.92	-0.59	0	0	0	0.044776	-0.007763	0.037669	-0.007763	0	0
ENST00000325748	PRKRA	O75569	ENSG00000180228	8575	6	21	-6	-0.59	18	-6	-0.59	0	0	0	0.030612	-0.008752	0.026239	-0.008752	0	0
ENST00000325974	CCZ1	P86791	ENSG00000122674	51622	8	24	-5.72	-0.33	23	-5.72	-0.33	0	0	0	0.082759	-0.019717	0.07931	-0.019717	0	0
ENST00000326019	SLC4A1AP	Q9BWU0	ENSG00000163798	22950	7	2	-0.2	-0.1	2	-0.2	-0.1	0	0	0	0.00692	-0.000675	0.00692	-0.000675	0	0
ENST00000326132	RNF185	Q96GF1	ENSG00000138942	91445	5	19	-2.28	-0.32	13	-2.28	-0.32	0	0	0	0.0078	-0.000938	0.005337	-0.000938	0	0
ENST00000326195	ABCF1	Q8NE71	ENSG00000204574	23	1	19	-3.44	-0.35	15	-3.44	-0.35	0	0	0	0.022782	-0.004126	0.017986	-0.004126	0	0
ENST00000326335	CUL4A	Q13619	ENSG00000139842	8451	1	126	-20.44	-0.74	102	-20.44	-0.74	0	0	0	0.084394	-0.013692	0.068319	-0.013692	0	0
ENST00000326434	CRELD1	Q96HD1	ENSG00000163703	78987	7	51	-13.11	-0.86	47	-13.11	-0.86	0	0	0	0.079193	-0.020352	0.072981	-0.020352	0	0
ENST00000326446	ARL6IP6	Q8N6S5	ENSG00000177917	151188	1	25	-5.85	-0.55	17	-5.85	-0.55	0	0	0	0.017655	-0.004131	0.012006	-0.004131	0	0
ENST00000326587	MAGED1	Q9Y5V3	ENSG00000179222	9500	4	17	-3.65	-0.49	16	-3.65	-0.49	0	0	0	0.076233	-0.01635	0.071749	-0.01635	0	0
ENST00000326624	ZBTB33	Q86T24	ENSG00000177485	10009	2	52	-6.83	-0.48	30	-6.83	-0.48	0	0	0	0.017526	-0.002301	0.010111	-0.002301	0	0
ENST00000326799	YME1L1	Q96TA2	ENSG00000136758	10730	5	57	-7.94	-0.66	37	-7.94	-0.66	0	0	0	0.037353	-0.005204	0.024246	-0.005204	0	0
ENST00000326877	LCORL	Q8N3X6	ENSG00000178177	254251	7	81	-15.76	-1.08	36	-15.76	-1.08	0	0	0	0.017901	-0.003482	0.007956	-0.003482	0	0
ENST00000326958	NPR3	P17342	ENSG00000113389	4883	9	30	-7.01	-0.64	25	-7.01	-0.64	0	0	0	0.005574	-0.001303	0.004645	-0.001303	0	0
ENST00000327031	FLII	Q13045	ENSG00000177731	2314	5	6	-2.4	-0.42	6	-2.4	-0.42	0	0	0	0.019672	-0.007856	0.019672	-0.007856	0	0
ENST00000327040	PSD3	Q9NYI0	ENSG00000156011	23362	7	484	-33.88	-0.6	249	-33.88	-0.6	0	0	0	0.057312	-0.004012	0.029485	-0.004012	0	0
ENST00000327134	PAK2	Q13177	ENSG00000180370	5062	8	180	-24.57	-0.57	111	-24.57	-0.57	0	0	0	0.042403	-0.005788	0.026148	-0.005788	0	0
ENST00000327367	SMAD3	P84022	ENSG00000166949	4088	1	95	-11.72	-0.56	64	-11.72	-0.56	0	0	0	0.020378	-0.002515	0.013728	-0.002515	0	0
ENST00000327381	XKR4	Q5GH76	ENSG00000206579	114786	7	855	-46.68	-0.67	301	-46.68	-0.67	0	0	0	0.047953	-0.002618	0.016882	-0.002618	0	0
ENST00000328024	RAB11B	Q15907	ENSG00000185236	9230	8	87	-11.03	-0.9	65	-11.03	-0.9	0	0	0	0.098976	-0.012546	0.073948	-0.012546	0	0
ENST00000328111	DNMT3B	Q9UBC3	ENSG00000088305	1789	4	27	-6.33	-0.58	25	-6.33	-0.58	0	0	0	0.018544	-0.00435	0.01717	-0.00435	0	0
ENST00000328205	LIN9	Q5TKA1	ENSG00000183814	286826	1	37	-12.37	-0.58	35	-12.37	-0.58	0	0	0	0.027468	-0.009186	0.025984	-0.009186	0	0
ENST00000328257	PPME1	Q9Y570	ENSG00000214517	51400	9	52	-9.42	-0.47	44	-9.42	-0.47	0	0	0	0.043478	-0.007875	0.036789	-0.007875	0	0
ENST00000328306	SLC9A7	Q96T83	ENSG00000065923	84679	9	175	-14.99	-0.49	105	-14.99	-0.49	0	0	0	0.106903	-0.00916	0.064142	-0.00916	0	0
ENST00000328345	POU3F2	P20265	ENSG00000184486	5454	2	175	-26.73	-0.69	120	-26.73	-0.69	0	0	0	0.05355	-0.008181	0.03672	-0.008181	0	0
ENST00000328439	MYT1	Q01538	ENSG00000196132	4661	6	104	-13.55	-0.5	83	-13.55	-0.5	0	0	0	0.057522	-0.007496	0.045907	-0.007496	0	0
ENST00000328709	COA5	Q86WW8	ENSG00000183513	493753	3	13	-6.01	-0.8	11	-6.01	-0.8	0	0	0	0.008997	-0.004156	0.007612	-0.004156	0	0
ENST00000328923	SHMT2	P34897	ENSG00000182199	6472	3	42	-9.36	-0.76	30	-9.36	-0.76	0	0	0	0.073298	-0.016337	0.052356	-0.016337	0	0
ENST00000328933	SYNGR1	O43759	ENSG00000100321	9145	9	33	-3.66	-0.26	26	-3.66	-0.26	0	0	0	0.008975	-0.000996	0.007071	-0.000996	0	0
ENST00000329138	HGS	O14964	ENSG00000185359	9146	8	6	-1.46	-0.45	6	-1.46	-0.45	0	0	0	0.011905	-0.002891	0.011905	-0.002891	0	0
ENST00000329146	CRIP2	P52943	ENSG00000182809	1397	9	9	-2.78	-0.49	9	-2.78	-0.49	0	0	0	0.017308	-0.00534	0.017308	-0.00534	0	0
ENST00000329235	AP1S2	P56377	ENSG00000182287	8905	6	103	-34.77	-1.67	73	-34.77	-1.67	0	0	0	0.067674	-0.022845	0.047963	-0.022845	0	0
ENST00000329251	EEF1G	P26641	ENSG00000254772	1937	3	4	-1.01	-0.27	4	-1.01	-0.27	0	0	0	0.049383	-0.012506	0.049383	-0.012506	0	0
ENST00000329271	GRPEL2	Q8TAA5	ENSG00000164284	134266	6	65	-16.42	-0.58	52	-16.42	-0.58	0	0	0	0.019673	-0.004969	0.015738	-0.004969	0	0
ENST00000329286	RAB12	Q6IQ22	ENSG00000206418	201475	9	68	-20.82	-0.77	58	-20.82	-0.77	0	0	0	0.060552	-0.018543	0.051647	-0.018543	0	0
ENST00000329421	MARCKSL1	P49006	ENSG00000175130	65108	9	34	-11.74	-0.5	28	-11.74	-0.5	0	0	0	0.044271	-0.015293	0.036458	-0.015293	0	0
ENST00000329474	CARMIL1	Q5VZK9	ENSG00000079691	55604	3	36	-8.58	-0.59	32	-8.58	-0.59	0	0	0	0.037895	-0.009036	0.033684	-0.009036	0	0
ENST00000329819	MRPL11	Q9Y3B7	ENSG00000174547	65003	3	11	-1.75	-0.69	9	-1.75	-0.69	0	0	0	0.036789	-0.005836	0.0301	-0.005836	0	0
ENST00000329908	IST1	P53990	ENSG00000182149	9798	5	70	-14.8	-0.76	54	-14.8	-0.76	0	0	0	0.057661	-0.012191	0.044481	-0.012191	0	0
ENST00000330062	IDH2	P48735	ENSG00000182054	3418	3	55	-14.91	-0.73	53	-14.91	-0.73	0	0	0	0.044935	-0.01218	0.043301	-0.01218	0	0
ENST00000330106	CEND1	Q8N111	ENSG00000184524	51286	9	23	-4.7	-0.45	22	-4.7	-0.45	0	0	0	0.022417	-0.004585	0.021442	-0.004585	0	0
ENST00000330149	TRAPPC6B	Q86SZ2	ENSG00000182400	122553	8	39	-9.69	-0.63	32	-9.69	-0.63	0	0	0	0.015348	-0.003813	0.012593	-0.003813	0	0
ENST00000330175	SAMD14	Q8IZD0	ENSG00000167100	201191	9	64	-7.22	-0.73	36	-7.22	-0.73	0	0	0	0.022409	-0.00253	0.012605	-0.00253	0	0
ENST00000330244	RPS17	P08708	ENSG00000182774	6218	3	2	-1.29	-0.64	2	-1.29	-0.64	0	0	0	0.037037	-0.023796	0.037037	-0.023796	0	0
ENST00000330263	MRTO4	Q9UKD2	ENSG00000053372	51154	5	20	-2.35	-0.45	13	-2.35	-0.45	0	0	0	0.015373	-0.00181	0.009992	-0.00181	0	0
ENST00000330459	KPNA2	P52292	ENSG00000182481	3838	1	71	-18.7	-0.61	66	-18.7	-0.61	0	0	0	0.285141	-0.0751	0.26506	-0.0751	0	0
ENST00000330636	LYRM4	Q9HD34	ENSG00000214113	57128	3	27	-3.39	-0.7	11	-3.39	-0.7	0	0	0	0.003951	-0.000496	0.00161	-0.000496	0	0
ENST00000330651	MAPK11	Q15759	ENSG00000185386	5600	6	2	-0.02	-0.01	2	-0.02	-0.01	0	0	0	0.001616	-1.8e-05	0.001616	-1.8e-05	0	0
ENST00000330884	SULT4A1	Q9BR01	ENSG00000130540	25830	9	63	-16.53	-0.6	58	-16.53	-0.6	0	0	0	0.04214	-0.011056	0.038796	-0.011056	0	0
ENST00000330949	SOX1	O00570	ENSG00000182968	6656	1	87	-19.08	-1.58	69	-19.08	-1.58	0	0	0	0.052505	-0.011516	0.041642	-0.011516	0	0
ENST00000331079	PRMT3	O60678	ENSG00000185238	10196	2	3	-0.61	-0.33	3	-0.61	-0.33	0	0	0	0.003559	-0.000728	0.003559	-0.000728	0	0
ENST00000331268	MORF4L1	Q9UBU8	ENSG00000185787	10933	4	58	-14.64	-0.56	56	-14.64	-0.56	0	0	0	0.054256	-0.013691	0.052385	-0.013691	0	0
ENST00000331327	PURA	Q00577	ENSG00000185129	5813	2	547	-88.18	-0.91	386	-88.18	-0.91	0	0	0	0.052235	-0.00842	0.03686	-0.00842	0	0
ENST00000331483	P4HB	P07237	ENSG00000185624	5034	2	6	-0.57	-0.11	6	-0.57	-0.11	0	0	0	0.007009	-0.000665	0.007009	-0.000665	0	0
ENST00000331552	NR2C2AP	Q86WQ0	ENSG00000184162	126382	6	14	-4.49	-0.57	14	-4.49	-0.57	0	0	0	0.027344	-0.008773	0.027344	-0.008773	0	0
ENST00000331569	ZNF703	Q9H7S9	ENSG00000183779	80139	6	148	-17.36	-1.08	99	-17.36	-1.08	0	0	0	0.10963	-0.012859	0.073333	-0.012859	0	0
ENST00000331573	PSMG1	O95456	ENSG00000183527	8624	1	35	-3.73	-0.58	24	-3.73	-0.58	0	0	0	0.042476	-0.004524	0.029126	-0.004524	0	0
ENST00000331710	TBK1	Q9UHD2	ENSG00000183735	29110	6	34	-9.65	-0.69	29	-9.65	-0.69	0	0	0	0.046575	-0.013226	0.039726	-0.013226	0	0
ENST00000331758	SS18L1	O75177	ENSG00000184402	26039	9	151	-23.2	-0.84	106	-23.2	-0.84	0	0	0	0.046051	-0.007074	0.032327	-0.007074	0	0
ENST00000331789	ACTB	P60709	ENSG00000075624	60	6	30	-9.82	-0.83	30	-9.82	-0.83	0	0	0	0.049669	-0.016253	0.049669	-0.016253	0	0
ENST00000331825	FTL	P02792	ENSG00000087086	2512	6	24	-11.32	-0.88	22	-11.32	-0.88	0	0	0	0.164384	-0.077568	0.150685	-0.077568	0	0
ENST00000331872	GLUL	P15104	ENSG00000135821	2752	1	109	-7.74	-0.6	52	-7.74	-0.6	0	0	0	0.040311	-0.002864	0.019231	-0.002864	0	0
ENST00000331925	ACTG1	P63261	ENSG00000184009	71	3	46	-14.55	-0.67	38	-14.55	-0.67	0	0	0	0.063712	-0.020147	0.052632	-0.020147	0	0
ENST00000332070	PHF6	Q8IWS0	ENSG00000156531	84295	1	237	-34.46	-0.48	178	-34.46	-0.48	0	0	0	0.068458	-0.009954	0.051415	-0.009954	0	0
ENST00000332118	SRPRA	P08240	ENSG00000182934	6734	5	51	-19.52	-0.69	49	-19.52	-0.69	0	0	0	0.051	-0.019524	0.049	-0.019524	0	0
ENST00000332129	KIF21B	O75037	ENSG00000116852	23046	9	190	-13.39	-0.75	129	-13.39	-0.75	0	0	0	0.040357	-0.002845	0.0274	-0.002845	0	0
ENST00000332160	METTL7A	Q9H8H3	ENSG00000185432	25840	1	26	-4.57	-0.7	18	-4.57	-0.7	0	0	0	0.01097	-0.001929	0.007595	-0.001929	0	0
ENST00000332180	WASHC4	Q2M389	ENSG00000136051	23325	3	66	-12.66	-0.83	54	-12.66	-0.83	0	0	0	0.029918	-0.005741	0.024479	-0.005741	0	0
ENST00000332211	VDAC2	P45880	ENSG00000165637	7417	9	23	-7	-0.4	23	-7	-0.4	0	0	0	0.049784	-0.015152	0.049784	-0.015152	0	0
ENST00000332303	NSMCE3	Q96MG7	ENSG00000185115	56160	5	1	-0.2	-0.2	1	-0.2	-0.2	0	0	0	0.000263	-5.3e-05	0.000263	-5.3e-05	0	0
ENST00000332499	HEXIM1	O94992	ENSG00000186834	10614	5	50	-9.59	-0.69	42	-9.59	-0.69	0	0	0	0.027263	-0.005231	0.022901	-0.005231	0	0
ENST00000332556	LAMP1	P11279	ENSG00000185896	3916	6	56	-14.61	-0.7	49	-14.61	-0.7	0	0	0	0.044657	-0.011653	0.039075	-0.011653	0	0
ENST00000332859	SUMO3	P55854	ENSG00000184900	6612	4	48	-14.16	-0.69	37	-14.16	-0.69	0	0	0	0.035901	-0.010593	0.027674	-0.010593	0	0
ENST00000332884	CYP2U1	Q7Z449	ENSG00000155016	113612	3	35	-7.25	-0.49	22	-7.25	-0.49	0	0	0	0.011525	-0.002386	0.007244	-0.002386	0	0
ENST00000333039	NPTXR	O95502	ENSG00000221890	23467	8	125	-11.32	-0.72	90	-11.32	-0.72	0	0	0	0.030048	-0.002721	0.021635	-0.002721	0	0
ENST00000333396	RIOX2	Q8IUF8	ENSG00000170854	84864	1	52	-4.02	-0.81	37	-4.02	-0.81	0	0	0	0.015435	-0.001194	0.010982	-0.001194	0	0
ENST00000333503	PGP	A6NDG6	ENSG00000184207	283871	4	84	-18.91	-0.8	63	-18.91	-0.8	0	0	0	0.048443	-0.010905	0.036332	-0.010905	0	0
ENST00000333577	EP400	Q96L91	ENSG00000183495	57634	2	1	-0.32	-0.32	1	-0.32	-0.32	0	0	0	0.027778	-0.008806	0.027778	-0.008806	0	0
ENST00000333628	TUBB2A	Q13885	ENSG00000137267	7280	9	18	-8.31	-0.66	18	-8.31	-0.66	0	0	0	0.091371	-0.042203	0.091371	-0.042203	0	0
ENST00000333651	HMG20B	Q9P0W2	ENSG00000064961	10362	1	7	-2.02	-0.5	6	-2.02	-0.5	0	0	0	0.012281	-0.003547	0.010526	-0.003547	0	0
ENST00000333926	CISD1	Q9NZ45	ENSG00000122873	55847	7	55	-12.36	-0.61	36	-12.36	-0.61	0	0	0	0.028365	-0.006373	0.018566	-0.006373	0	0
ENST00000333942	RHOT1	Q8IXI2	ENSG00000126858	55288	9	37	-8.84	-0.37	35	-8.84	-0.37	0	0	0	0.035577	-0.008502	0.033654	-0.008502	0	0
ENST00000333957	C2CD5	Q86YS7	ENSG00000111731	9847	8	56	-12.03	-0.66	41	-12.03	-0.66	0	0	0	0.047458	-0.010197	0.034746	-0.010197	0	0
ENST00000334082	HOMER1	Q86YM7	ENSG00000152413	9456	9	213	-38.46	-0.87	145	-38.46	-0.87	0	0	0	0.063092	-0.011393	0.04295	-0.011393	0	0
ENST00000334121	SREK1	Q8WXA9	ENSG00000153914	140890	3	324	-48.56	-0.76	207	-48.56	-0.76	0	0	0	0.068211	-0.010224	0.043579	-0.010224	0	0
ENST00000334186	PPFIA3	O75145	ENSG00000177380	8541	9	41	-10.03	-0.48	37	-10.03	-0.48	0	0	0	0.051122	-0.012509	0.046135	-0.012509	0	0
ENST00000334220	DLST	P36957	ENSG00000119689	1743	6	70	-12.29	-0.57	57	-12.29	-0.57	0	0	0	0.049365	-0.008669	0.040197	-0.008669	0	0
ENST00000334456	PDE2A	O00408	ENSG00000186642	5138	9	21	-2.97	-0.33	20	-2.97	-0.33	0	0	0	0.016854	-0.002382	0.016051	-0.002382	0	0
ENST00000334635	DCUN1D4	Q92564	ENSG00000109184	23142	8	231	-51.43	-0.95	164	-51.43	-0.95	0	0	0	0.070946	-0.015795	0.050369	-0.015795	0	0
ENST00000334660	CHP1	Q99653	ENSG00000187446	11261	3	115	-28.5	-0.72	86	-28.5	-0.72	0	0	0	0.045927	-0.011383	0.034345	-0.011383	0	0
ENST00000334705	FAM91A1	Q658Y4	ENSG00000176853	157769	2	119	-21.31	-0.64	78	-21.31	-0.64	0	0	0	0.043257	-0.007748	0.028353	-0.007748	0	0
ENST00000334828	PGAM1	P18669	ENSG00000171314	5223	4	31	-11.36	-0.63	28	-11.36	-0.63	0	0	0	0.033696	-0.012348	0.030435	-0.012348	0	0
ENST00000334919	CELF4	Q9BZC1	ENSG00000101489	56853	7	147	-27.19	-0.92	103	-27.19	-0.92	0	0	0	0.066879	-0.01237	0.046861	-0.01237	0	0
ENST00000334956	PARVA	Q9NVD7	ENSG00000197702	55742	1	208	-21.66	-1.05	109	-21.66	-1.05	0	0	0	0.072247	-0.007524	0.03786	-0.007524	0	0
ENST00000335007	PPP1CC	P36873	ENSG00000186298	5501	1	131	-29.83	-0.77	80	-29.83	-0.77	0	0	0	0.093638	-0.021326	0.057184	-0.021326	0	0
ENST00000335016	BMP2K	Q9NSY1	ENSG00000138756	55589	2	280	-27.21	-0.8	177	-27.21	-0.8	0	0	0	1.80645	-0.175555	1.14193	-0.175555	0	0
ENST00000335420	KLHDC10	Q6PID8	ENSG00000128607	23008	9	207	-30.72	-0.69	153	-30.72	-0.69	0	0	0	0.041591	-0.006173	0.030741	-0.006173	0	0
ENST00000335659	ANKRD46	Q86W74	ENSG00000186106	157567	9	20	-5.5	-0.44	16	-5.5	-0.44	0	0	0	0.011198	-0.003077	0.008959	-0.003077	0	0
ENST00000335725	TDP1	Q9NUW8	ENSG00000042088	55775	1	4	-0.85	-0.23	4	-0.85	-0.23	0	0	0	0.002457	-0.00052	0.002457	-0.00052	0	0
ENST00000335727	TNRC6B	Q9UPQ9	ENSG00000100354	23112	5	1164	-63.31	-0.69	570	-63.31	-0.69	0	0	0	0.092601	-0.005036	0.045346	-0.005036	0	0
ENST00000335749	TNRC6C	Q9HCJ0	ENSG00000078687	57690	7	338	-29.27	-0.53	269	-29.27	-0.53	0	0	0	0.084648	-0.00733	0.067368	-0.00733	0	0
ENST00000335753	SLK	Q9H2G2	ENSG00000065613	9748	3	140	-17.79	-0.65	99	-17.79	-0.65	0	0	0	0.039818	-0.005061	0.028157	-0.005061	0	0
ENST00000335783	CENPQ	Q7L2Z9	ENSG00000031691	55166	1	5	-2.38	-0.53	5	-2.38	-0.53	0	0	0	0.005988	-0.00285	0.005988	-0.00285	0	0
ENST00000335793	CDC42EP4	Q9H3Q1	ENSG00000179604	23580	1	16	-1.64	-0.44	10	-1.64	-0.44	0	0	0	0.008845	-0.000905	0.005528	-0.000905	0	0
ENST00000335891	DCAF1	Q9Y4B6	ENSG00000145041	9730	6	7	-1.06	-0.15	7	-1.06	-0.15	0	0	0	0.007527	-0.001138	0.007527	-0.001138	0	0
ENST00000335953	ZBTB16	Q05516	ENSG00000109906	7704	4	391	-41.42	-1	285	-41.42	-1	0	0	0	3.15323	-0.334056	2.29839	-0.334056	0	0
ENST00000336156	KIAA0930	Q6ICG6	ENSG00000100364	23313	9	101	-11.03	-0.58	44	-11.03	-0.58	0	0	0	0.014764	-0.001613	0.006432	-0.001613	0	0
ENST00000336216	HMG20A	Q9NP66	ENSG00000140382	10363	8	104	-18.82	-0.84	71	-18.82	-0.84	0	0	0	0.03929	-0.007111	0.026823	-0.007111	0	0
ENST00000336273	MTDH	Q86UE4	ENSG00000147649	92140	6	450	-62.16	-0.98	349	-62.16	-0.98	0	0	0	0.109676	-0.015149	0.08506	-0.015149	0	0
ENST00000336283	SRA1	Q9HD15	ENSG00000213523	10011	5	21	-6.63	-0.7	15	-6.63	-0.7	0	0	0	0.033071	-0.010436	0.023622	-0.010436	0	0
ENST00000336349	SPTY2D1	Q68D10	ENSG00000179119	144108	5	206	-32.57	-0.69	167	-32.57	-0.69	0	0	0	0.059486	-0.009405	0.048224	-0.009405	0	0
ENST00000336431	GGT7	Q9UJ14	ENSG00000131067	2686	9	39	-9.37	-0.49	28	-9.37	-0.49	0	0	0	0.06383	-0.015331	0.045827	-0.015331	0	0
ENST00000336505	SCAI	Q8N9R8	ENSG00000173611	286205	8	441	-30.95	-0.69	216	-30.95	-0.69	0	0	0	0.043227	-0.003034	0.021172	-0.003034	0	0
ENST00000336576	DNAJB2	P25686	ENSG00000135924	3300	9	34	-3.86	-0.58	30	-3.86	-0.58	0	0	0	0.017745	-0.002017	0.015658	-0.002017	0	0
ENST00000336578	PBLD	P30039	ENSG00000108187	64081	2	2	-1.15	-0.58	2	-1.15	-0.58	0	0	0	0.001316	-0.000756	0.001316	-0.000756	0	0
ENST00000336596	EPHA3	P29320	ENSG00000044524	2042	6	68	-14.38	-0.56	63	-14.38	-0.56	0	0	0	0.025806	-0.005456	0.023909	-0.005456	0	0
ENST00000336617	RNASEH2B	Q5TBB1	ENSG00000136104	79621	1	14	-2.78	-0.51	10	-2.78	-0.51	0	0	0	0.047619	-0.009469	0.034014	-0.009469	0	0
ENST00000336702	C2CD2L	O14523	ENSG00000172375	9854	9	38	-3.96	-0.52	19	-3.96	-0.52	0	0	0	0.016587	-0.00173	0.008293	-0.00173	0	0
ENST00000336714	SEC23B	Q15437	ENSG00000101310	10483	6	27	-6.96	-0.89	15	-6.96	-0.89	0	0	0	0.039823	-0.010261	0.022124	-0.010261	0	0
ENST00000336767	BRIX1	Q8TDN6	ENSG00000113460	55299	1	5	-1.95	-0.45	5	-1.95	-0.45	0	0	0	0.009921	-0.003863	0.009921	-0.003863	0	0
ENST00000336812	DHX15	O43143	ENSG00000109606	1665	4	76	-18.88	-0.85	74	-18.88	-0.85	0	0	0	0.168142	-0.041768	0.163717	-0.041768	0	0
ENST00000336838	CCDC88A	Q3V6T2	ENSG00000115355	55704	8	252	-27.43	-0.41	177	-27.43	-0.41	0	0	0	0.074978	-0.00816	0.052663	-0.00816	0	0
ENST00000336926	HIP1	O00291	ENSG00000127946	3092	1	164	-17.05	-0.52	108	-17.05	-0.52	0	0	0	0.033641	-0.003498	0.022154	-0.003498	0	0
ENST00000337002	SEC62	Q99442	ENSG00000008952	7095	7	265	-34.76	-0.75	162	-34.76	-0.75	0	0	0	0.049878	-0.006542	0.030491	-0.006542	0	0
ENST00000337018	SUGP2	Q8IX01	ENSG00000064607	10147	9	4	-0.81	-0.21	4	-0.81	-0.21	0	0	0	0.015385	-0.003135	0.015385	-0.003135	0	0
ENST00000337132	NECAP2	Q9NVZ3	ENSG00000157191	55707	5	44	-8.39	-0.68	36	-8.39	-0.68	0	0	0	0.036944	-0.007048	0.030227	-0.007048	0	0
ENST00000337147	EZR	P15311	ENSG00000092820	7430	2	61	-19.53	-0.7	56	-19.53	-0.7	0	0	0	0.051871	-0.016606	0.047619	-0.016606	0	0
ENST00000337179	NUDT4	Q9NZJ9	ENSG00000173598	11163	5	176	-36.02	-1.27	126	-36.02	-1.27	0	0	0	0.020068	-0.004107	0.014367	-0.004107	0	0
ENST00000337195	CTBP2	P56545	ENSG00000175029	1488	1	246	-26.71	-0.67	165	-26.71	-0.67	0	0	0	0.047271	-0.005132	0.031706	-0.005132	0	0
ENST00000337227	RBBP9	O75884	ENSG00000089050	10741	1	13	-4.04	-0.65	8	-4.04	-0.65	0	0	0	0.004029	-0.001253	0.002479	-0.001253	0	0
ENST00000337231	CDR2L	Q86X02	ENSG00000109089	30850	8	113	-16.5	-0.79	88	-16.5	-0.79	0	0	0	0.065356	-0.009544	0.050896	-0.009544	0	0
ENST00000337273	TNPO1	Q92973	ENSG00000083312	3842	4	804	-74.89	-0.86	505	-74.89	-0.86	0	0	0	0.099715	-0.009288	0.062632	-0.009288	0	0
ENST00000337344	PCID2	Q5JVF3	ENSG00000126226	55795	4	1	-0.27	-0.27	1	-0.27	-0.27	0	0	0	0.001603	-0.000429	0.001603	-0.000429	0	0
ENST00000337537	PPP2R5E	Q16537	ENSG00000154001	5529	9	267	-32.73	-0.91	198	-32.73	-0.91	0	0	0	0.057358	-0.007031	0.042535	-0.007031	0	0
ENST00000337573	EBAG9	O00559	ENSG00000147654	9166	8	37	-9.53	-0.78	31	-9.53	-0.78	0	0	0	0.025694	-0.006621	0.021528	-0.006621	0	0
ENST00000337659	PRPF4B	Q13523	ENSG00000112739	8899	1	148	-14.02	-0.46	96	-14.02	-0.46	0	0	0	0.114374	-0.010835	0.074189	-0.010835	0	0
ENST00000337679	YIF1B	Q5BJH7	ENSG00000167645	90522	7	35	-2.61	-0.23	21	-2.61	-0.23	0	0	0	0.092593	-0.006899	0.055556	-0.006899	0	0
ENST00000337702	TTC33	Q6PID6	ENSG00000113638	23548	7	47	-5.72	-0.57	25	-5.72	-0.57	0	0	0	0.028093	-0.00342	0.014943	-0.00342	0	0
ENST00000337714	AKAP1	Q92667	ENSG00000121057	8165	9	130	-29.99	-0.65	108	-29.99	-0.65	0	0	0	0.126459	-0.029172	0.105058	-0.029172	0	0
ENST00000337859	ZC3H15	Q8WU90	ENSG00000065548	55854	5	75	-9.72	-0.68	47	-9.72	-0.68	0	0	0	0.118483	-0.015354	0.07425	-0.015354	0	0
ENST00000337975	KLHL25	Q9H0H3	ENSG00000183655	64410	8	22	-3.92	-0.49	16	-3.92	-0.49	0	0	0	0.012821	-0.002286	0.009324	-0.002286	0	0
ENST00000338034	ELAC2	Q9BQ52	ENSG00000006744	60528	5	31	-3.86	-0.55	23	-3.86	-0.55	0	0	0	0.072093	-0.008981	0.053488	-0.008981	0	0
ENST00000338128	ISYNA1	Q9NPH2	ENSG00000105655	51477	4	1	-0.06	-0.06	1	-0.06	-0.06	0	0	0	0.001894	-0.000119	0.001894	-0.000119	0	0
ENST00000338193	PRIM1	P49642	ENSG00000198056	5557	1	5	-0.46	-0.26	5	-0.46	-0.26	0	0	0	0.052083	-0.004812	0.052083	-0.004812	0	0
ENST00000338205	ECPAS	Q5VYK3	ENSG00000136813	23392	5	45	-11.83	-0.6	42	-11.83	-0.6	0	0	0	0.033557	-0.008819	0.03132	-0.008819	0	0
ENST00000338272	TMEM167B	Q9NRX6	ENSG00000215717	56900	5	35	-10.42	-1.3	27	-10.42	-1.3	0	0	0	0.014356	-0.004274	0.011075	-0.004274	0	0
ENST00000338343	FBXL19	Q6PCT2	ENSG00000099364	54620	9	128	-19.73	-0.83	99	-19.73	-0.83	0	0	0	0.082262	-0.012681	0.063625	-0.012681	0	0
ENST00000338366	TAF13	Q15543	ENSG00000197780	6884	2	32	-6.46	-0.48	25	-6.46	-0.48	0	0	0	0.082902	-0.016749	0.064767	-0.016749	0	0
ENST00000338435	GLS	O94925	ENSG00000115419	2744	9	67	-5.84	-0.42	33	-5.84	-0.42	0	0	0	0.027572	-0.002403	0.01358	-0.002403	0	0
ENST00000338448	PALM	O75781	ENSG00000099864	5064	8	56	-11.17	-0.72	32	-11.17	-0.72	0	0	0	0.036891	-0.00736	0.02108	-0.00736	0	0
ENST00000338492	DPYSL4	O14531	ENSG00000151640	10570	4	24	-7.1	-1.08	22	-7.1	-1.08	0	0	0	0.028269	-0.008364	0.025913	-0.008364	0	0
ENST00000338700	TRIM2	Q9C040	ENSG00000109654	23321	8	192	-20.84	-0.61	124	-20.84	-0.61	0	0	0	0.044067	-0.004784	0.02846	-0.004784	0	0
ENST00000338797	CRTC1	Q6UUV9	ENSG00000105662	23373	8	179	-15.24	-0.75	96	-15.24	-0.75	0	0	0	0.036132	-0.003077	0.019378	-0.003077	0	0
ENST00000338946	PHF8	Q9UPP1	ENSG00000172943	23133	1	130	-10.1	-0.55	90	-10.1	-0.55	0	0	0	0.099846	-0.007756	0.069124	-0.007756	0	0
ENST00000338961	PTGES2	Q9H7Z7	ENSG00000148334	80142	9	6	-1.46	-0.27	6	-1.46	-0.27	0	0	0	0.013187	-0.00322	0.013187	-0.00322	0	0
ENST00000338963	NEDD4	P46934	ENSG00000069869	4734	5	132	-23.61	-0.76	94	-23.61	-0.76	0	0	0	0.044325	-0.007926	0.031565	-0.007926	0	0
ENST00000338983	MAP3K20	Q9NYL2	ENSG00000091436	51776	2	226	-23.07	-0.76	122	-23.07	-0.76	0	0	0	0.040221	-0.004105	0.021712	-0.004105	0	0
ENST00000339020	SMIM15	Q7Z3B0	ENSG00000188725	643155	8	85	-20.11	-0.87	52	-20.11	-0.87	0	0	0	0.037929	-0.008976	0.023204	-0.008976	0	0
ENST00000339083	RHOC	P08134	ENSG00000155366	389	1	45	-18.67	-1.15	43	-18.67	-1.15	0	0	0	0.102975	-0.042725	0.098398	-0.042725	0	0
ENST00000339399	ANP32B	Q92688	ENSG00000136938	10541	1	101	-20.26	-0.68	78	-20.26	-0.68	0	0	0	0.196117	-0.039336	0.151456	-0.039336	0	0
ENST00000339438	CSDE1	O75534	ENSG00000009307	7812	9	42	-9.01	-0.39	42	-9.01	-0.39	0	0	0	0.03336	-0.007158	0.03336	-0.007158	0	0
ENST00000339464	WNT7B	P56706	ENSG00000188064	7477	7	39	-6.94	-0.58	36	-6.94	-0.58	0	0	0	0.015619	-0.002779	0.014417	-0.002779	0	0
ENST00000339514	MYO1B	O43795	ENSG00000128641	4430	1	24	-6.61	-0.73	24	-6.61	-0.73	0	0	0	0.01676	-0.004616	0.01676	-0.004616	0	0
ENST00000339570	SCARB1	Q8WTV0	ENSG00000073060	949	3	37	-9.61	-0.62	30	-9.61	-0.62	0	0	0	0.022924	-0.005952	0.018587	-0.005952	0	0
ENST00000339594	BAZ1B	Q9UIG0	ENSG00000009954	9031	1	68	-12.47	-0.53	61	-12.47	-0.53	0	0	0	0.05175	-0.009488	0.046423	-0.009488	0	0
ENST00000339600	NDUFA4	O00483	ENSG00000189043	4697	9	43	-25.81	-1.16	43	-25.81	-1.16	0	0	0	0.025474	-0.015289	0.025474	-0.015289	0	0
ENST00000339618	ALDH3A2	P51648	ENSG00000072210	224	6	8	-2.12	-0.42	7	-2.12	-0.42	0	0	0	0.003841	-0.001019	0.003361	-0.001019	0	0
ENST00000339659	DYRK1A	Q13627	ENSG00000157540	1859	8	417	-52.2	-0.69	301	-52.2	-0.69	0	0	0	0.146419	-0.018329	0.105688	-0.018329	0	0
ENST00000339697	SERINC1	Q9NRX5	ENSG00000111897	57515	9	48	-8.77	-0.98	32	-8.77	-0.98	0	0	0	0.028352	-0.005178	0.018901	-0.005178	0	0
ENST00000339754	NECAP1	Q8NC96	ENSG00000089818	25977	9	83	-20.81	-0.5	75	-20.81	-0.5	0	0	0	0.049112	-0.012311	0.044379	-0.012311	0	0
ENST00000339865	USP47	Q96K76	ENSG00000170242	55031	1	362	-50.62	-1.07	254	-50.62	-1.07	0	0	0	0.114884	-0.016064	0.080609	-0.016064	0	0
ENST00000339997	RTN3	O95197	ENSG00000133318	10313	9	60	-7.96	-0.34	52	-7.96	-0.34	0	0	0	0.03544	-0.004703	0.030715	-0.004703	0	0
ENST00000340020	AIDA	Q96BJ3	ENSG00000186063	64853	2	165	-25.67	-0.66	115	-25.67	-0.66	0	0	0	0.087626	-0.013633	0.061073	-0.013633	0	0
ENST00000340124	GPT2	Q8TD30	ENSG00000166123	84706	1	59	-9.34	-0.68	48	-9.34	-0.68	0	0	0	0.025619	-0.004056	0.020842	-0.004056	0	0
ENST00000340149	GAB2	Q9UQC2	ENSG00000033327	9846	8	150	-16.94	-0.74	101	-16.94	-0.74	0	0	0	0.037707	-0.004259	0.02539	-0.004259	0	0
ENST00000340305	TMEM201	Q5SNT2	ENSG00000188807	199953	3	19	-2.43	-0.27	17	-2.43	-0.27	0	0	0	0.007127	-0.000911	0.006377	-0.000911	0	0
ENST00000340385	PRDX6	P30041	ENSG00000117592	9588	1	23	-7.56	-0.7	20	-7.56	-0.7	0	0	0	0.024287	-0.007987	0.021119	-0.007987	0	0
ENST00000340437	CPSF7	Q8N684	ENSG00000149532	79869	3	72	-10.23	-0.4	57	-10.23	-0.4	0	0	0	0.034749	-0.004938	0.02751	-0.004938	0	0
ENST00000340438	GSPT2	Q8IYD1	ENSG00000189369	23708	9	18	-3.9	-0.52	18	-3.9	-0.52	0	0	0	0.024931	-0.005402	0.024931	-0.005402	0	0
ENST00000340473	GTF2F2	P13984	ENSG00000188342	2963	3	6	-1.74	-0.59	5	-1.74	-0.59	0	0	0	0.004441	-0.001285	0.003701	-0.001285	0	0
ENST00000340573	UBE2L6	O14933	ENSG00000156587	9246	5	10	-3.46	-0.72	6	-3.46	-0.72	0	0	0	0.014184	-0.004902	0.008511	-0.004902	0	0
ENST00000340630	IFT27	Q9BW83	ENSG00000100360	11020	4	2	-1.45	-0.73	2	-1.45	-0.73	0	0	0	0.017857	-0.012955	0.017857	-0.012955	0	0
ENST00000340635	PDE4D	Q08499	ENSG00000113448	5144	6	557	-57.87	-0.74	377	-57.87	-0.74	0	0	0	0.098952	-0.010281	0.066975	-0.010281	0	0
ENST00000340648	RRP1B	Q14684	ENSG00000160208	23076	3	25	-4.54	-0.35	23	-4.54	-0.35	0	0	0	0.009263	-0.001682	0.008522	-0.001682	0	0
ENST00000340666	SYN1	P17600	ENSG00000008056	6853	9	56	-9.42	-0.66	47	-9.42	-0.66	0	0	0	0.054054	-0.009089	0.045367	-0.009089	0	0
ENST00000340748	DNMT1	P26358	ENSG00000130816	1786	1	11	-3.7	-0.51	11	-3.7	-0.51	0	0	0	0.033951	-0.011407	0.033951	-0.011407	0	0
ENST00000340855	IDS	P22304	ENSG00000010404	3423	9	17	-3.38	-0.54	14	-3.38	-0.54	0	0	0	0.002952	-0.000586	0.002431	-0.000586	0	0
ENST00000340881	PPIL4	Q8WUA2	ENSG00000131013	85313	3	101	-14.98	-0.76	37	-14.98	-0.76	0	0	0	0.58046	-0.08608	0.212644	-0.08608	0	0
ENST00000340941	MCCC2	Q9HCC0	ENSG00000131844	64087	3	2	-0.6	-0.32	2	-0.6	-0.32	0	0	0	0.001083	-0.000328	0.001083	-0.000328	0	0
ENST00000341148	RBM33	Q96EV2	ENSG00000184863	155435	8	165	-19.84	-0.76	83	-19.84	-0.76	0	0	0	0.025593	-0.003078	0.012874	-0.003078	0	0
ENST00000341156	B4GALNT1	Q00973	ENSG00000135454	2583	8	55	-14.02	-0.93	48	-14.02	-0.93	0	0	0	0.064554	-0.01645	0.056338	-0.01645	0	0
ENST00000341170	TSTD2	Q5T7W7	ENSG00000136925	158427	5	37	-3.6	-0.68	22	-3.6	-0.68	0	0	0	0.015488	-0.001509	0.009209	-0.001509	0	0
ENST00000341189	ARMCX3	Q9UH62	ENSG00000102401	51566	9	75	-13.43	-0.79	56	-13.43	-0.79	0	0	0	0.043428	-0.007774	0.032426	-0.007774	0	0
ENST00000341223	CFL2	Q9Y281	ENSG00000165410	1073	2	546	-112.52	-1.17	367	-112.52	-1.17	0	0	0	0.220073	-0.045353	0.147924	-0.045353	0	0
ENST00000341441	MEST	Q5EB52	ENSG00000106484	4232	4	30	-8.46	-0.59	26	-8.46	-0.59	0	0	0	0.024213	-0.006824	0.020985	-0.006824	0	0
ENST00000341657	ANKFY1	Q9P2R3	ENSG00000185722	51479	8	476	-41.04	-0.62	266	-41.04	-0.62	0	0	0	0.122839	-0.01059	0.068645	-0.01059	0	0
ENST00000341695	PPA2	Q9H2U2	ENSG00000138777	27068	4	3	-1.32	-0.52	3	-1.32	-0.52	0	0	0	0.004608	-0.002023	0.004608	-0.002023	0	0
ENST00000341776	JARID2	Q92833	ENSG00000008083	3720	4	213	-44.15	-0.53	207	-44.15	-0.53	0	0	0	0.120135	-0.024901	0.116751	-0.024901	0	0
ENST00000341861	DPP8	Q6V1X1	ENSG00000074603	54878	4	160	-25.67	-1.17	120	-25.67	-1.17	0	0	0	0.036166	-0.005802	0.027125	-0.005802	0	0
ENST00000341928	EPB41L3	Q9Y2J2	ENSG00000082397	23136	7	46	-12.27	-0.57	43	-12.27	-0.57	0	0	0	0.041667	-0.011115	0.038949	-0.011115	0	0
ENST00000342032	PPP1R17	O96001	ENSG00000106341	10842	1	2	-0.99	-0.51	2	-0.99	-0.51	0	0	0	0.001702	-0.000844	0.001702	-0.000844	0	0
ENST00000342320	RBPJ	Q06330	ENSG00000168214	3516	3	188	-25.44	-0.49	134	-25.44	-0.49	0	0	0	0.045554	-0.006164	0.032469	-0.006164	0	0
ENST00000342415	SNRNP48	Q6IEG0	ENSG00000168566	154007	3	13	-1.75	-0.31	9	-1.75	-0.31	0	0	0	0.004198	-0.000566	0.002906	-0.000566	0	0
ENST00000342560	GDAP1L1	Q96MZ0	ENSG00000124194	78997	8	63	-14.67	-0.58	53	-14.67	-0.58	0	0	0	0.05855	-0.013631	0.049257	-0.013631	0	0
ENST00000342665	SOX12	O15370	ENSG00000177732	6666	5	268	-53.23	-4.02	189	-53.23	-4.02	0	0	0	0.079881	-0.015866	0.056334	-0.015866	0	0
ENST00000342740	CARMIL3	Q8ND23	ENSG00000186648	90668	9	20	-2.76	-0.29	18	-2.76	-0.29	0	0	0	0.061162	-0.008428	0.055046	-0.008428	0	0
ENST00000342771	AUTS2	Q8WXX7	ENSG00000158321	26053	9	132	-19.89	-0.6	108	-19.89	-0.6	0	0	0	0.052758	-0.007951	0.043165	-0.007951	0	0
ENST00000342947	GSDME	O60443	ENSG00000105928	1687	9	4	-1.09	-0.46	3	-1.09	-0.46	0	0	0	0.0059	-0.001609	0.004425	-0.001609	0	0
ENST00000342981	EIF4G1	Q04637	ENSG00000114867	1981	1	32	-6.5	-0.33	32	-6.5	-0.33	0	0	0	0.07064	-0.014338	0.07064	-0.014338	0	0
ENST00000343090	UBE4B	O95155	ENSG00000130939	10277	4	36	-10.39	-0.63	33	-10.39	-0.63	0	0	0	0.027994	-0.008081	0.025661	-0.008081	0	0
ENST00000343115	RDX	P35241	ENSG00000137710	5962	2	216	-28.84	-0.71	133	-28.84	-0.71	0	0	0	0.088852	-0.011863	0.05471	-0.011863	0	0
ENST00000343255	SRSF10	O75494	ENSG00000188529	10772	3	611	-75.05	-1.03	382	-75.05	-1.03	0	0	0	0.296314	-0.036394	0.185257	-0.036394	0	0
ENST00000343289	NT5C2	P49902	ENSG00000076685	22978	7	8	-0.86	-0.21	5	-0.86	-0.21	0	0	0	0.004828	-0.000518	0.003018	-0.000518	0	0
ENST00000343307	B3GLCT	Q6Y288	ENSG00000187676	145173	2	25	-6.3	-0.71	17	-6.3	-0.71	0	0	0	0.009575	-0.002414	0.006511	-0.002414	0	0
ENST00000343526	TRIM24	O15164	ENSG00000122779	8805	1	142	-15.82	-0.88	83	-15.82	-0.88	0	0	0	0.028147	-0.003137	0.016452	-0.003137	0	0
ENST00000343619	ATP6V0A1	Q93050	ENSG00000033627	535	9	20	-1.75	-0.2	16	-1.75	-0.2	0	0	0	0.013387	-0.001175	0.01071	-0.001175	0	0
ENST00000343632	GGA1	Q9UJY5	ENSG00000100083	26088	6	86	-12.87	-0.33	70	-12.87	-0.33	0	0	0	0.100467	-0.015035	0.081776	-0.015035	0	0
ENST00000343674	DGKZ	Q13574	ENSG00000149091	8525	8	26	-7.72	-0.84	25	-7.72	-0.84	0	0	0	0.042623	-0.012659	0.040984	-0.012659	0	0
ENST00000343737	WNT8B	Q93098	ENSG00000075290	7479	4	97	-12.51	-0.67	64	-12.51	-0.67	0	0	0	0.104189	-0.013434	0.068743	-0.013434	0	0
ENST00000343765	VIPAS39	Q9H9C1	ENSG00000151445	63894	9	12	-2.93	-0.46	8	-2.93	-0.46	0	0	0	0.012712	-0.0031	0.008475	-0.0031	0	0
ENST00000343813	ICMT	O60725	ENSG00000116237	23463	4	93	-14.88	-0.57	67	-14.88	-0.57	0	0	0	0.023907	-0.003826	0.017224	-0.003826	0	0
ENST00000343882	FOXO3	O43524	ENSG00000118689	2309	5	202	-24.6	-0.47	146	-24.6	-0.47	0	0	0	0.040522	-0.004935	0.029288	-0.004935	0	0
ENST00000343936	ZC3H6	P61129	ENSG00000188177	376940	8	347	-23.99	-0.41	181	-23.99	-0.41	0	0	0	0.04579	-0.003165	0.023885	-0.003165	0	0
ENST00000344147	ZCCHC17	Q9NP64	ENSG00000121766	51538	7	45	-12.18	-0.86	25	-12.18	-0.86	0	0	0	0.060322	-0.016323	0.033512	-0.016323	0	0
ENST00000344204	TRIO	O75962	ENSG00000038382	7204	8	144	-18.36	-0.55	121	-18.36	-0.55	0	0	0	0.080672	-0.010283	0.067787	-0.010283	0	0
ENST00000344290	MAPT	P10636	ENSG00000186868	4137	9	91	-9.09	-0.8	65	-9.09	-0.8	0	0	0	0.021843	-0.002182	0.015602	-0.002182	0	0
ENST00000344293	TAF3	Q5VWG9	ENSG00000165632	83860	5	37	-4.8	-0.41	26	-4.8	-0.41	0	0	0	0.019691	-0.002554	0.013837	-0.002554	0	0
ENST00000344548	CDC42	P60953	ENSG00000070831	998	5	89	-23.13	-0.77	78	-23.13	-0.77	0	0	0	0.062151	-0.016149	0.054469	-0.016149	0	0
ENST00000344651	UNC119B	A6NIH7	ENSG00000175970	84747	1	100	-11.79	-0.52	54	-11.79	-0.52	0	0	0	0.027693	-0.003265	0.014954	-0.003265	0	0
ENST00000344836	USP7	Q93009	ENSG00000187555	7874	8	41	-8.13	-0.46	38	-8.13	-0.46	0	0	0	0.0215	-0.004264	0.019927	-0.004264	0	0
ENST00000344949	TBC1D23	Q9NUY8	ENSG00000036054	55773	2	2	-0.54	-0.27	2	-0.54	-0.27	0	0	0	0.001261	-0.000342	0.001261	-0.000342	0	0
ENST00000345003	GYG1	P46976	ENSG00000163754	2992	1	8	-2.67	-0.42	7	-2.67	-0.42	0	0	0	0.011396	-0.003809	0.009972	-0.003809	0	0
ENST00000345094	THUMPD3	Q9BV44	ENSG00000134077	25917	5	56	-11.35	-0.85	36	-11.35	-0.85	0	0	0	0.026591	-0.005391	0.017094	-0.005391	0	0
ENST00000345122	ARHGAP5	Q13017	ENSG00000100852	394	1	215	-20.14	-0.84	114	-20.14	-0.84	0	0	0	0.044951	-0.004212	0.023834	-0.004212	0	0
ENST00000345146	IDH1	O75874	ENSG00000138413	3417	4	52	-13.25	-0.72	47	-13.25	-0.72	0	0	0	0.060819	-0.015502	0.054971	-0.015502	0	0
ENST00000345617	HDAC4	P56524	ENSG00000068024	9759	4	221	-26.93	-0.98	172	-26.93	-0.98	0	0	0	0.044809	-0.005461	0.034874	-0.005461	0	0
ENST00000345716	NISCH	Q9Y2I1	ENSG00000010322	11188	8	15	-3.69	-0.69	14	-3.69	-0.69	0	0	0	0.025338	-0.006233	0.023649	-0.006233	0	0
ENST00000346085	ARID1B	Q8NFD5	ENSG00000049618	57492	8	133	-15.44	-0.99	98	-15.44	-0.99	0	0	0	0.046005	-0.00534	0.033898	-0.00534	0	0
ENST00000346128	TJP1	Q07157	ENSG00000104067	7082	1	133	-22.26	-0.53	102	-22.26	-0.53	0	0	0	0.059615	-0.009978	0.045719	-0.009978	0	0
ENST00000346177	FLNC	Q14315	ENSG00000128591	2318	2	30	-3.5	-0.41	30	-3.5	-0.41	0	0	0	0.039788	-0.004639	0.039788	-0.004639	0	0
ENST00000346178	GANAB	Q14697	ENSG00000089597	23193	1	25	-6.04	-0.6	24	-6.04	-0.6	0	0	0	0.025202	-0.006088	0.024194	-0.006088	0	0
ENST00000346249	TPD52L2	O43399	ENSG00000101150	7165	5	72	-14.96	-0.75	51	-14.96	-0.75	0	0	0	0.044916	-0.00933	0.031815	-0.00933	0	0
ENST00000346299	MTMR2	Q13614	ENSG00000087053	8898	8	112	-22.82	-0.95	81	-22.82	-0.95	0	0	0	0.046454	-0.009465	0.033596	-0.009465	0	0
ENST00000346562	NPAS3	Q8IXF0	ENSG00000151322	64067	1	375	-53.37	-0.86	318	-53.37	-0.86	0	0	0	0.12215	-0.017385	0.103583	-0.017385	0	0
ENST00000346798	APP	P05067	ENSG00000142192	351	9	195	-36.77	-0.82	166	-36.77	-0.82	0	0	0	0.173642	-0.032743	0.147818	-0.032743	0	0
ENST00000346932	SEZ6L2	Q6UXD5	ENSG00000174938	26470	9	42	-10.58	-0.59	41	-10.58	-0.59	0	0	0	0.077348	-0.019479	0.075506	-0.019479	0	0
ENST00000346964	DLG1	Q12959	ENSG00000075711	1739	1	49	-5.66	-0.51	39	-5.66	-0.51	0	0	0	0.023717	-0.002739	0.018877	-0.002739	0	0
ENST00000347140	R3HDM2	Q9Y2K5	ENSG00000179912	22864	8	57	-9.3	-0.73	53	-9.3	-0.73	0	0	0	0.056324	-0.009194	0.052372	-0.009194	0	0
ENST00000347230	ZFYVE26	Q68DK2	ENSG00000072121	23503	8	146	-27.26	-0.82	121	-27.26	-0.82	0	0	0	0.076081	-0.014204	0.063054	-0.014204	0	0
ENST00000347545	ARHGEF1	Q92888	ENSG00000076928	9138	2	23	-2.79	-0.33	20	-2.79	-0.33	0	0	0	0.062162	-0.007527	0.054054	-0.007527	0	0
ENST00000347617	HMGA1	P17096	ENSG00000137309	3159	7	65	-21.8	-1.48	56	-21.8	-1.48	0	0	0	0.048148	-0.016146	0.041481	-0.016146	0	0
ENST00000347635	NUP50	Q9UKX7	ENSG00000093000	10762	1	133	-27.93	-0.74	100	-27.93	-0.74	0	0	0	0.039548	-0.008304	0.029735	-0.008304	0	0
ENST00000347869	RBM5	P52756	ENSG00000003756	10181	5	10	-2.94	-0.41	10	-2.94	-0.41	0	0	0	0.017606	-0.005174	0.017606	-0.005174	0	0
ENST00000347992	MINK1	Q8N4C8	ENSG00000141503	50488	9	92	-15.23	-0.35	89	-15.23	-0.35	0	0	0	0.119481	-0.019781	0.115584	-0.019781	0	0
ENST00000348035	RAC1	P63000	ENSG00000136238	5879	8	78	-25.57	-1.11	71	-25.57	-1.11	0	0	0	0.050847	-0.016666	0.046284	-0.016666	0	0
ENST00000348428	MALT1	Q9UDY8	ENSG00000172175	10892	1	21	-1.9	-0.28	13	-1.9	-0.28	0	0	0	0.003164	-0.000286	0.001958	-0.000286	0	0
ENST00000348495	SSBP4	Q9BWG4	ENSG00000130511	170463	7	2	-0.1	-0.05	2	-0.1	-0.05	0	0	0	0.00627	-0.000307	0.00627	-0.000307	0	0
ENST00000348628	CAMK2A	Q9UQM7	ENSG00000070808	815	7	91	-11.7	-0.56	68	-11.7	-0.56	0	0	0	0.028243	-0.003632	0.021105	-0.003632	0	0
ENST00000348657	POLDIP3	Q9BY77	ENSG00000100227	84271	2	13	-2.04	-0.5	8	-2.04	-0.5	0	0	0	0.006271	-0.000983	0.003859	-0.000983	0	0
ENST00000348943	HNRNPM	P52272	ENSG00000099783	4670	1	11	-5.78	-0.61	11	-5.78	-0.61	0	0	0	0.041825	-0.021966	0.041825	-0.021966	0	0
ENST00000349456	CFAP36	Q96G28	ENSG00000163001	112942	4	10	-3.01	-0.68	9	-3.01	-0.68	0	0	0	0.011442	-0.003441	0.010297	-0.003441	0	0
ENST00000349496	CTNNB1	P35222	ENSG00000168036	1499	1	38	-5.72	-0.39	36	-5.72	-0.39	0	0	0	0.034111	-0.005131	0.032316	-0.005131	0	0
ENST00000349553	CALB2	P22676	ENSG00000172137	794	4	24	-8.02	-0.62	24	-8.02	-0.62	0	0	0	0.033473	-0.011179	0.033473	-0.011179	0	0
ENST00000349703	RFC1	P35251	ENSG00000035928	5981	1	16	-2.25	-0.34	11	-2.25	-0.34	0	0	0	0.012232	-0.001722	0.00841	-0.001722	0	0
ENST00000349721	SMARCA2	P51531	ENSG00000080503	6595	8	55	-14.02	-0.41	55	-14.02	-0.41	0	0	0	0.065632	-0.016726	0.065632	-0.016726	0	0
ENST00000349995	COG3	Q96JB2	ENSG00000136152	83548	9	92	-10.5	-0.41	75	-10.5	-0.41	0	0	0	0.04837	-0.005521	0.039432	-0.005521	0	0
ENST00000350030	NASP	P49321	ENSG00000132780	4678	1	48	-7.97	-1.09	46	-7.97	-1.09	0	0	0	0.063492	-0.010542	0.060847	-0.010542	0	0
ENST00000350092	PTBP1	P26599	ENSG00000011304	5725	1	167	-44.34	-0.97	141	-44.34	-0.97	0	0	0	0.119371	-0.031694	0.100786	-0.031694	0	0
ENST00000350997	FADS1	O60427	ENSG00000149485	3992	4	62	-9.54	-1.2	41	-9.54	-1.2	0	0	0	0.02223	-0.00342	0.014701	-0.00342	0	0
ENST00000351004	GNAI1	P63096	ENSG00000127955	2770	9	50	-11.02	-0.54	34	-11.02	-0.54	0	0	0	0.026824	-0.005913	0.01824	-0.005913	0	0
ENST00000351018	RHOG	P84095	ENSG00000177105	391	1	37	-11.99	-1.71	25	-11.99	-1.71	0	0	0	0.062925	-0.020388	0.042517	-0.020388	0	0
ENST00000351266	CNTFR	P26992	ENSG00000122756	1271	1	75	-18.78	-0.59	71	-18.78	-0.59	0	0	0	0.116822	-0.029248	0.110592	-0.029248	0	0
ENST00000351293	CAMK2G	Q13555	ENSG00000148660	818	9	212	-25.15	-0.42	167	-25.15	-0.42	0	0	0	0.10495	-0.01245	0.082673	-0.01245	0	0
ENST00000351842	USP4	Q13107	ENSG00000114316	7375	5	26	-4.86	-0.55	20	-4.86	-0.55	0	0	0	0.055914	-0.010454	0.043011	-0.010454	0	0
ENST00000351960	NUMA1	Q14980	ENSG00000137497	4926	2	21	-4.23	-0.44	19	-4.23	-0.44	0	0	0	0.031532	-0.006356	0.028529	-0.006356	0	0
ENST00000352035	ACLY	P53396	ENSG00000131473	47	4	30	-4.9	-0.38	27	-4.9	-0.38	0	0	0	0.033149	-0.005419	0.029834	-0.005419	0	0
ENST00000352171	NRDC	O43847	ENSG00000078618	4898	5	19	-4.97	-0.4	19	-4.97	-0.4	0	0	0	0.395833	-0.103438	0.395833	-0.103438	0	0
ENST00000352251	PROSER1	Q86XN7	ENSG00000120685	80209	2	40	-5.35	-0.3	30	-5.35	-0.3	0	0	0	0.026631	-0.003562	0.019973	-0.003562	0	0
ENST00000352456	HNRNPUL1	Q9BUJ2	ENSG00000105323	11100	2	76	-14.34	-0.66	62	-14.34	-0.66	0	0	0	0.073359	-0.013847	0.059846	-0.013847	0	0
ENST00000352645	ZC3H7B	Q9UGR2	ENSG00000100403	23264	7	176	-16.1	-0.5	130	-16.1	-0.5	0	0	0	0.064682	-0.005916	0.047777	-0.005916	0	0
ENST00000352957	MRPL39	Q9NYK5	ENSG00000154719	54148	3	2	-0.39	-0.39	1	-0.39	-0.39	0	0	0	0.037037	-0.007241	0.018519	-0.007241	0	0
ENST00000353088	NSFL1C	Q9UNZ2	ENSG00000088833	55968	6	24	-5.8	-0.7	23	-5.8	-0.7	0	0	0	0.015094	-0.003646	0.014465	-0.003646	0	0
ENST00000353258	GDE1	Q9NZC3	ENSG00000006007	51573	7	97	-17.93	-0.8	56	-17.93	-0.8	0	0	0	0.054372	-0.01005	0.03139	-0.01005	0	0
ENST00000353364	USP15	Q9Y4E8	ENSG00000135655	9958	9	393	-42.92	-1.19	258	-42.92	-1.19	0	0	0	0.032704	-0.003571	0.02147	-0.003571	0	0
ENST00000353703	YWHAB	P31946	ENSG00000166913	7529	9	139	-34.03	-0.76	96	-34.03	-0.76	0	0	0	0.066285	-0.016228	0.04578	-0.016228	0	0
ENST00000354161	SLC12A9	Q9BXP2	ENSG00000146828	56996	9	19	-5.93	-0.48	17	-5.93	-0.48	0	0	0	0.046798	-0.014606	0.041872	-0.014606	0	0
ENST00000354232	ETFB	P38117	ENSG00000105379	2109	9	8	-2.77	-0.68	8	-2.77	-0.68	0	0	0	0.177778	-0.0616	0.177778	-0.0616	0	0
ENST00000354258	TAP1	Q03518	ENSG00000168394	6890	2	14	-3.43	-0.43	13	-3.43	-0.43	0	0	0	0.037534	-0.009209	0.034853	-0.009209	0	0
ENST00000354268	SMARCAD1	Q9H4L7	ENSG00000163104	56916	7	104	-17.42	-0.72	94	-17.42	-0.72	0	0	0	0.059057	-0.009894	0.053379	-0.009894	0	0
ENST00000354287	FBXO2	Q9UK22	ENSG00000116661	26232	9	2	-0.24	-0.13	2	-0.24	-0.13	0	0	0	0.006061	-0.000742	0.006061	-0.000742	0	0
ENST00000354293	AP2A1	O95782	ENSG00000196961	160	9	49	-7.7	-0.4	46	-7.7	-0.4	0	0	0	0.137255	-0.021557	0.128852	-0.021557	0	0
ENST00000354336	CRKL	P46109	ENSG00000099942	1399	2	197	-34.46	-0.62	138	-34.46	-0.62	0	0	0	0.050422	-0.00882	0.035321	-0.00882	0	0
ENST00000354371	COPS8	Q99627	ENSG00000198612	10920	9	28	-8	-0.56	23	-8	-0.56	0	0	0	0.010268	-0.002933	0.008434	-0.002933	0	0
ENST00000354452	TCF4	P15884	ENSG00000196628	6925	6	728	-71.7	-0.84	429	-71.7	-0.84	0	0	0	0.580542	-0.057175	0.342105	-0.057175	0	0
ENST00000354546	ANXA6	P08133	ENSG00000197043	309	2	10	-1.81	-1.11	4	-1.81	-1.11	0	0	0	0.028902	-0.00522	0.011561	-0.00522	0	0
ENST00000354662	LMO3	Q8TAP4	ENSG00000048540	55885	7	208	-47.59	-1.03	150	-47.59	-1.03	0	0	0	0.072931	-0.016688	0.052595	-0.016688	0	0
ENST00000354764	PGAP1	Q75T13	ENSG00000197121	80055	8	122	-14.54	-1.76	58	-14.54	-1.76	0	0	0	0.014818	-0.001766	0.007045	-0.001766	0	0
ENST00000354775	ALDH9A1	P49189	ENSG00000143149	223	2	6	-2.23	-0.41	6	-2.23	-0.41	0	0	0	0.007168	-0.002661	0.007168	-0.002661	0	0
ENST00000354817	FAR1	Q8WVX9	ENSG00000197601	84188	5	100	-18.26	-0.72	76	-18.26	-0.72	0	0	0	0.027972	-0.005108	0.021259	-0.005108	0	0
ENST00000354828	GABPA	Q06546	ENSG00000154727	2551	2	198	-15.67	-0.44	113	-15.67	-0.44	0	0	0	0.061281	-0.004851	0.034974	-0.004851	0	0
ENST00000354947	PIP4K2C	Q8TBX8	ENSG00000166908	79837	9	109	-19.4	-0.77	94	-19.4	-0.77	0	0	0	0.066261	-0.011793	0.057143	-0.011793	0	0
ENST00000355076	KCTD6	Q8NC69	ENSG00000168301	200845	6	25	-10.84	-0.57	25	-10.84	-0.57	0	0	0	0.0342	-0.014822	0.0342	-0.014822	0	0
ENST00000355086	SRGAP1	Q7Z6B7	ENSG00000196935	57522	9	300	-29.99	-0.7	210	-29.99	-0.7	0	0	0	0.015344	-0.001534	0.010741	-0.001534	0	0
ENST00000355221	ATP6V1H	Q9UI12	ENSG00000047249	51606	9	13	-5.16	-0.65	13	-5.16	-0.65	0	0	0	0.031707	-0.012578	0.031707	-0.012578	0	0
ENST00000355238	SYNCRIP	O60506	ENSG00000135316	10492	6	501	-63.83	-0.96	365	-63.83	-0.96	0	0	0	0.109965	-0.014009	0.080114	-0.014009	0	0
ENST00000355264	AP3M1	Q9Y2T2	ENSG00000185009	26985	1	200	-36.26	-0.81	145	-36.26	-0.81	0	0	0	0.056211	-0.01019	0.040753	-0.01019	0	0
ENST00000355295	TDRD7	Q8NHU6	ENSG00000196116	23424	6	9	-5.45	-0.98	8	-5.45	-0.98	0	0	0	0.036735	-0.022249	0.032653	-0.022249	0	0
ENST00000355312	GIT2	Q14161	ENSG00000139436	9815	5	74	-16.29	-0.57	60	-16.29	-0.57	0	0	0	0.023205	-0.005108	0.018815	-0.005108	0	0
ENST00000355446	ERC1	Q8IUD2	ENSG00000082805	23085	9	216	-14.87	-0.85	126	-14.87	-0.85	0	0	0	0.089776	-0.006181	0.052369	-0.006181	0	0
ENST00000355451	NUDCD3	Q8IVD9	ENSG00000015676	23386	8	55	-6.28	-0.54	37	-6.28	-0.54	0	0	0	0.007979	-0.000911	0.005368	-0.000911	0	0
ENST00000355621	UBE2H	P62256	ENSG00000186591	7328	8	186	-34.78	-0.88	145	-34.78	-0.88	0	0	0	0.044202	-0.008265	0.034458	-0.008265	0	0
ENST00000355681	FNBP1	Q96RU3	ENSG00000187239	23048	6	75	-13.42	-0.77	49	-13.42	-0.77	0	0	0	8.33333	-1.49067	5.44444	-1.49067	0	0
ENST00000355689	TTC30A	Q86WT1	ENSG00000197557	92104	4	25	-1.71	-0.3	14	-1.71	-0.3	0	0	0	0.006729	-0.000461	0.003769	-0.000461	0	0
ENST00000355693	COA4	Q9NYJ1	ENSG00000181924	51287	3	20	-7.03	-0.98	17	-7.03	-0.98	0	0	0	0.044346	-0.015585	0.037694	-0.015585	0	0
ENST00000355765	PRPF39	Q86UA1	ENSG00000185246	55015	5	6	-1.78	-0.33	6	-1.78	-0.33	0	0	0	0.008683	-0.00258	0.008683	-0.00258	0	0
ENST00000355803	UBE2I	P63279	ENSG00000103275	7329	6	101	-25.52	-0.71	91	-25.52	-0.71	0	0	0	0.045332	-0.011454	0.040844	-0.011454	0	0
ENST00000355832	ERCC6	Q03468	ENSG00000225830	2074	9	48	-9.14	-0.65	35	-9.14	-0.65	0	0	0	0.013913	-0.002648	0.010145	-0.002648	0	0
ENST00000355849	KHDRBS3	O75525	ENSG00000131773	10656	9	62	-17.08	-0.62	58	-17.08	-0.62	0	0	0	0.117202	-0.032284	0.109641	-0.032284	0	0
ENST00000355854	CAB39L	Q9H9S4	ENSG00000102547	81617	8	28	-5.31	-0.41	22	-5.31	-0.41	0	0	0	0.012921	-0.00245	0.010152	-0.00245	0	0
ENST00000355857	DBI	P07108	ENSG00000155368	1622	1	7	-0.97	-0.15	7	-0.97	-0.15	0	0	0	0.028571	-0.003963	0.028571	-0.003963	0	0
ENST00000355943	SLC25A46	Q96AG3	ENSG00000164209	91137	9	44	-6.37	-0.57	21	-6.37	-0.57	0	0	0	0.043781	-0.006335	0.020896	-0.006335	0	0
ENST00000355951	TCAF1	Q9Y4C2	ENSG00000198420	9747	8	17	-2.57	-0.36	14	-2.57	-0.36	0	0	0	0.036017	-0.005441	0.029661	-0.005441	0	0
ENST00000355957	STX16	O14662	ENSG00000124222	8675	6	172	-24.63	-0.71	109	-24.63	-0.71	0	0	0	0.053119	-0.007608	0.033663	-0.007608	0	0
ENST00000355999	STK39	Q9UEW8	ENSG00000198648	27347	1	102	-24.75	-0.54	96	-24.75	-0.54	0	0	0	0.068966	-0.016737	0.064909	-0.016737	0	0
ENST00000356079	CYP20A1	Q6UW02	ENSG00000119004	57404	2	102	-5.6	-0.76	24	-5.6	-0.76	0	0	0	0.231818	-0.012732	0.054545	-0.012732	0	0
ENST00000356090	NCDN	Q9UBB6	ENSG00000020129	23154	9	32	-2.28	-0.51	25	-2.28	-0.51	0	0	0	0.028597	-0.002039	0.022341	-0.002039	0	0
ENST00000356126	PSMD12	O00232	ENSG00000197170	5718	6	38	-6.24	-0.47	27	-6.24	-0.47	0	0	0	0.012969	-0.002131	0.009215	-0.002131	0	0
ENST00000356136	UVRAG	Q9P2Y5	ENSG00000198382	7405	8	63	-6.69	-0.38	54	-6.69	-0.38	0	0	0	0.035294	-0.003747	0.030252	-0.003747	0	0
ENST00000356195	CDCA7L	Q96GN5	ENSG00000164649	55536	1	59	-13.49	-0.67	49	-13.49	-0.67	0	0	0	0.041404	-0.009467	0.034386	-0.009467	0	0
ENST00000356198	CENPL	Q8N0S6	ENSG00000120334	91687	1	4	-1.06	-0.41	3	-1.06	-0.41	0	0	0	0.00444	-0.001181	0.00333	-0.001181	0	0
ENST00000356205	SLC39A1	Q9NY26	ENSG00000143570	27173	1	83	-22.67	-1.23	72	-22.67	-1.23	0	0	0	0.082834	-0.022623	0.071856	-0.022623	0	0
ENST00000356239	AKAP9	Q99996	ENSG00000127914	10142	8	26	-10.25	-0.73	25	-10.25	-0.73	0	0	0	0.05029	-0.019834	0.048356	-0.019834	0	0
ENST00000356300	JPH4	Q96JJ6	ENSG00000092051	84502	8	50	-8.37	-0.57	38	-8.37	-0.57	0	0	0	0.031211	-0.005223	0.02372	-0.005223	0	0
ENST00000356362	PUS7	Q96PZ0	ENSG00000091127	54517	1	19	-4.76	-0.55	16	-4.76	-0.55	0	0	0	0.014821	-0.003714	0.01248	-0.003714	0	0
ENST00000356401	ARIH2	O95376	ENSG00000177479	10425	5	151	-16.51	-0.81	85	-16.51	-0.81	0	0	0	0.048475	-0.0053	0.027287	-0.0053	0	0
ENST00000356436	TBC1D7	Q9P0N9	ENSG00000145979	51256	9	6	-2.82	-0.53	6	-2.82	-0.53	0	0	0	0.039216	-0.018425	0.039216	-0.018425	0	0
ENST00000356454	SOWAHC	Q53LP3	ENSG00000198142	65124	6	104	-20.79	-0.83	77	-20.79	-0.83	0	0	0	0.035543	-0.007105	0.026316	-0.007105	0	0
ENST00000356457	ASPH	Q12797	ENSG00000198363	444	1	69	-23.61	-1.05	53	-23.61	-1.05	0	0	0	0.02689	-0.009202	0.020655	-0.009202	0	0
ENST00000356537	CCDC25	Q86WR0	ENSG00000147419	55246	1	20	-4.9	-0.44	18	-4.9	-0.44	0	0	0	0.006878	-0.001685	0.00619	-0.001685	0	0
ENST00000356692	PPP4R2	Q9NY27	ENSG00000163605	151987	3	240	-51.15	-0.73	173	-51.15	-0.73	0	0	0	0.068966	-0.014697	0.049713	-0.014697	0	0
ENST00000356708	ATP5F1C	P36542	ENSG00000165629	509	7	7	-3.57	-0.69	7	-3.57	-0.69	0	0	0	0.036842	-0.018811	0.036842	-0.018811	0	0
ENST00000356805	SPTBN1	Q01082	ENSG00000115306	6711	7	104	-7.89	-0.3	85	-7.89	-0.3	0	0	0	0.093778	-0.007115	0.076646	-0.007115	0	0
ENST00000356839	ACADVL	P49748	ENSG00000072778	37	5	10	-3.46	-0.64	7	-3.46	-0.64	0	0	0	0.055866	-0.019318	0.039106	-0.019318	0	0
ENST00000356860	CACNA2D1	P54289	ENSG00000153956	781	7	289	-35	-0.81	177	-35	-0.81	0	0	0	0.073146	-0.008858	0.044799	-0.008858	0	0
ENST00000356940	RAB18	Q9NP72	ENSG00000099246	22931	6	91	-19.38	-0.78	64	-19.38	-0.78	0	0	0	0.021843	-0.004652	0.015362	-0.004652	0	0
ENST00000356970	CLCC1	Q96S66	ENSG00000121940	23155	1	75	-14.07	-0.59	60	-14.07	-0.59	0	0	0	0.024655	-0.004627	0.019724	-0.004627	0	0
ENST00000356994	SCRIB	Q14160	ENSG00000180900	23513	1	19	-5.44	-0.61	19	-5.44	-0.61	0	0	0	0.077236	-0.02213	0.077236	-0.02213	0	0
ENST00000357065	HNRNPF	P52597	ENSG00000169813	3185	1	98	-22.44	-0.77	90	-22.44	-0.77	0	0	0	0.095797	-0.021936	0.087977	-0.021936	0	0
ENST00000357067	DCTD	P32321	ENSG00000129187	1635	3	14	-4.11	-0.83	11	-4.11	-0.83	0	0	0	0.010786	-0.003168	0.008475	-0.003168	0	0
ENST00000357077	ANK2	Q01484	ENSG00000145362	287	8	154	-18.61	-0.65	119	-18.61	-0.65	0	0	0	0.067782	-0.008193	0.052377	-0.008193	0	0
ENST00000357156	DYNLRB1	Q9NP97	ENSG00000125971	83658	9	9	-3.23	-0.94	8	-3.23	-0.94	0	0	0	0.026706	-0.009599	0.023739	-0.009599	0	0
ENST00000357164	GM2A	P17900	ENSG00000196743	2760	1	44	-6.49	-0.69	23	-6.49	-0.69	0	0	0	0.014706	-0.002169	0.007687	-0.002169	0	0
ENST00000357195	BCL11B	Q9C0K0	ENSG00000127152	64919	7	546	-43.89	-0.55	382	-43.89	-0.55	0	0	0	0.112184	-0.009018	0.078488	-0.009018	0	0
ENST00000357308	GFPT1	Q06210	ENSG00000198380	2673	5	208	-20.69	-0.6	102	-20.69	-0.6	0	0	0	0.032384	-0.003222	0.01588	-0.003222	0	0
ENST00000357325	HDGF	P51858	ENSG00000143321	3068	3	51	-9.51	-0.61	47	-9.51	-0.61	0	0	0	0.037918	-0.007068	0.034944	-0.007068	0	0
ENST00000357345	SYNJ1	O43426	ENSG00000159082	8867	9	148	-17.36	-0.57	90	-17.36	-0.57	0	0	0	0.048541	-0.005693	0.029518	-0.005693	0	0
ENST00000357388	SMC4	Q9NTJ3	ENSG00000113810	10051	1	4	-1.12	-0.62	2	-1.12	-0.62	0	0	0	0.00346	-0.000971	0.00173	-0.000971	0	0
ENST00000357430	ACSL3	O95573	ENSG00000123983	2181	7	104	-13.52	-0.64	69	-13.52	-0.64	0	0	0	0.034806	-0.004525	0.023092	-0.004525	0	0
ENST00000357472	MBNL1	Q9NR56	ENSG00000152601	4154	2	501	-82.24	-0.83	396	-82.24	-0.83	0	0	0	0.145597	-0.0239	0.115083	-0.0239	0	0
ENST00000357573	RABEP2	Q9H5N1	ENSG00000177548	79874	6	16	-4.38	-0.49	16	-4.38	-0.49	0	0	0	0.030476	-0.008347	0.030476	-0.008347	0	0
ENST00000357578	ALDH5A1	P51649	ENSG00000112294	7915	7	28	-5.89	-0.6	22	-5.89	-0.6	0	0	0	0.008005	-0.001684	0.006289	-0.001684	0	0
ENST00000357606	DNAJC14	Q6Y2X3	ENSG00000135392	85406	5	63	-14.74	-0.63	52	-14.74	-0.63	0	0	0	0.061765	-0.014453	0.05098	-0.014453	0	0
ENST00000357637	PIGN	O95427	ENSG00000197563	23556	2	5	-0.75	-0.38	3	-0.75	-0.38	0	0	0	0.003075	-0.00046	0.001845	-0.00046	0	0
ENST00000357668	ASAP1	Q9ULH1	ENSG00000153317	50807	2	152	-14.93	-0.36	113	-14.93	-0.36	0	0	0	0.057861	-0.005685	0.043015	-0.005685	0	0
ENST00000357727	CREB5	Q02930	ENSG00000146592	9586	1	267	-36.7	-0.63	164	-36.7	-0.63	0	0	0	0.040345	-0.005545	0.024781	-0.005545	0	0
ENST00000357816	AMER2	Q8N7J2	ENSG00000165566	219287	8	237	-25.26	-0.69	136	-25.26	-0.69	0	0	0	0.029913	-0.003188	0.017165	-0.003188	0	0
ENST00000358015	RAD23B	P54727	ENSG00000119318	5887	3	211	-40.47	-0.88	174	-40.47	-0.88	0	0	0	0.083038	-0.015925	0.068477	-0.015925	0	0
ENST00000358025	SYNE2	Q8WXH0	ENSG00000054654	23224	1	45	-5.08	-0.45	43	-5.08	-0.45	0	0	0	0.049505	-0.005594	0.047305	-0.005594	0	0
ENST00000358053	OSBPL2	Q9H1P3	ENSG00000130703	9885	8	28	-6.17	-0.57	22	-6.17	-0.57	0	0	0	0.012033	-0.00265	0.009454	-0.00265	0	0
ENST00000358056	GMFB	P60983	ENSG00000197045	2764	9	291	-63.01	-0.85	217	-63.01	-0.85	0	0	0	0.080699	-0.017474	0.060177	-0.017474	0	0
ENST00000358075	MAGT1	Q9H0U3	ENSG00000102158	84061	1	109	-30.11	-1.15	81	-30.11	-1.15	0	0	0	0.038125	-0.010533	0.028332	-0.010533	0	0
ENST00000358117	MPPED2	Q15777	ENSG00000066382	744	1	123	-33.29	-0.81	109	-33.29	-0.81	0	0	0	0.087857	-0.02378	0.077857	-0.02378	0	0
ENST00000358130	HMGN5	P82970	ENSG00000198157	79366	1	55	-7.73	-0.67	38	-7.73	-0.67	0	0	0	0.057834	-0.008125	0.039958	-0.008125	0	0
ENST00000358220	WDR37	Q9Y2I8	ENSG00000047056	22884	9	398	-57.66	-0.85	227	-57.66	-0.85	0	0	0	0.134641	-0.019505	0.076793	-0.019505	0	0
ENST00000358252	TNKS1BP1	Q9C0C2	ENSG00000149115	85456	5	25	-4.1	-0.33	21	-4.1	-0.33	0	0	0	0.054945	-0.009013	0.046154	-0.009013	0	0
ENST00000358290	HSD17B11	Q8NBQ5	ENSG00000198189	51170	6	9	-3.36	-0.65	7	-3.36	-0.65	0	0	0	0.013453	-0.005018	0.010463	-0.005018	0	0
ENST00000358385	ATL1	Q8WXF7	ENSG00000198513	51062	9	9	-1.09	-0.26	7	-1.09	-0.26	0	0	0	0.012295	-0.001484	0.009563	-0.001484	0	0
ENST00000358465	TRIM33	Q9UPN9	ENSG00000197323	51592	2	155	-18.93	-0.78	97	-18.93	-0.78	0	0	0	0.031801	-0.003884	0.019902	-0.003884	0	0
ENST00000358595	ARNT	P27540	ENSG00000143437	405	1	93	-17.26	-0.6	80	-17.26	-0.6	0	0	0	0.040103	-0.007444	0.034498	-0.007444	0	0
ENST00000358602	ANKRD17	O75179	ENSG00000132466	26057	9	215	-32.86	-0.7	155	-32.86	-0.7	0	0	0	0.075227	-0.011498	0.054234	-0.011498	0	0
ENST00000358677	SPATS2L	Q9NUQ6	ENSG00000196141	26010	4	185	-26.28	-0.97	124	-26.28	-0.97	0	0	0	0.043684	-0.006205	0.02928	-0.006205	0	0
ENST00000358701	QSOX2	Q6ZRP7	ENSG00000165661	169714	6	17	-4.47	-0.43	16	-4.47	-0.43	0	0	0	0.007089	-0.001864	0.006672	-0.001864	0	0
ENST00000358704	ZBTB18	Q99592	ENSG00000179456	10472	9	364	-75.28	-0.97	335	-75.28	-0.97	0	0	0	0.172594	-0.035697	0.158843	-0.035697	0	0
ENST00000358716	BAZ1A	Q9NRL2	ENSG00000198604	11177	1	43	-10.7	-0.49	42	-10.7	-0.49	0	0	0	0.055128	-0.013718	0.053846	-0.013718	0	0
ENST00000358763	SYN3	O14994	ENSG00000185666	8224	7	13	-1.99	-0.28	10	-1.99	-0.28	0	0	0	0.011374	-0.001738	0.008749	-0.001738	0	0
ENST00000358776	ACADSB	P45954	ENSG00000196177	36	9	57	-7.39	-0.59	32	-7.39	-0.59	0	0	0	0.01253	-0.001625	0.007035	-0.001625	0	0
ENST00000358780	FAM76B	Q5HYJ3	ENSG00000077458	143684	6	139	-26.85	-0.66	91	-26.85	-0.66	0	0	0	0.053013	-0.010241	0.034706	-0.010241	0	0
ENST00000358807	MICAL1	Q8TDZ2	ENSG00000135596	64780	8	9	-2.96	-0.44	9	-2.96	-0.44	0	0	0	0.068182	-0.022439	0.068182	-0.022439	0	0
ENST00000358812	MANEA	Q5SRI9	ENSG00000172469	79694	1	18	-1.89	-0.37	12	-1.89	-0.37	0	0	0	0.005892	-0.000617	0.003928	-0.000617	0	0
ENST00000358823	CAMSAP2	Q08AD1	ENSG00000118200	23271	9	210	-27.99	-0.66	150	-27.99	-0.66	0	0	0	0.079305	-0.010571	0.056647	-0.010571	0	0
ENST00000358825	PRDM10	Q9NQV6	ENSG00000170325	56980	8	97	-9.71	-0.37	75	-9.71	-0.37	0	0	0	0.037165	-0.00372	0.028736	-0.00372	0	0
ENST00000358869	FAM114A1	Q8IWE2	ENSG00000197712	92689	1	60	-12.04	-0.85	42	-12.04	-0.85	0	0	0	0.02746	-0.00551	0.019222	-0.00551	0	0
ENST00000358931	SIRT2	Q8IXJ6	ENSG00000068903	22933	8	7	-2.66	-0.73	5	-2.66	-0.73	0	0	0	0.008696	-0.003307	0.006211	-0.003307	0	0
ENST00000358933	EDC4	Q6P2E9	ENSG00000038358	23644	9	4	-0.57	-0.16	4	-0.57	-0.16	0	0	0	0.011173	-0.001595	0.011173	-0.001595	0	0
ENST00000359227	ELAVL3	Q14576	ENSG00000196361	1995	9	182	-14.35	-0.8	119	-14.35	-0.8	0	0	0	0.056822	-0.004482	0.037153	-0.004482	0	0
ENST00000359358	KLHL14	Q9P2G3	ENSG00000197705	57565	4	153	-23.63	-0.76	98	-23.63	-0.76	0	0	0	0.076923	-0.011882	0.049271	-0.011882	0	0
ENST00000359426	HK1	P19367	ENSG00000156515	3098	9	35	-6.02	-0.5	33	-6.02	-0.5	0	0	0	0.046667	-0.008021	0.044	-0.008021	0	0
ENST00000359428	NUP214	P35658	ENSG00000126883	8021	1	3	-0.53	-0.31	2	-0.53	-0.31	0	0	0	0.00253	-0.000446	0.001686	-0.000446	0	0
ENST00000359486	TCF20	Q9UGU0	ENSG00000100207	6942	9	41	-5.1	-0.51	38	-5.1	-0.51	0	0	0	0.029433	-0.003663	0.027279	-0.003663	0	0
ENST00000359546	CPLX2	Q6PUV4	ENSG00000145920	10814	6	164	-28.95	-1.11	109	-28.95	-1.11	0	0	0	0.041227	-0.007277	0.027401	-0.007277	0	0
ENST00000359676	NOL4L	Q96MY1	ENSG00000197183	140688	9	394	-59.01	-0.83	312	-59.01	-0.83	0	0	0	0.086784	-0.012998	0.068722	-0.012998	0	0
ENST00000359803	MDK	P21741	ENSG00000110492	4192	2	12	-4.65	-0.55	12	-4.65	-0.55	0	0	0	0.035928	-0.013913	0.035928	-0.013913	0	0
ENST00000359856	ARPC5	O15511	ENSG00000162704	10092	9	23	-8.92	-0.9	20	-8.92	-0.9	0	0	0	0.003438	-0.001333	0.00299	-0.001333	0	0
ENST00000359943	FAM3C	Q92520	ENSG00000196937	10447	9	69	-21.12	-1.05	43	-21.12	-1.05	0	0	0	0.042777	-0.013095	0.026658	-0.013095	0	0
ENST00000360003	MCMBP	Q9BTE3	ENSG00000197771	79892	1	133	-16.78	-0.46	102	-16.78	-0.46	0	0	0	0.064158	-0.008096	0.049204	-0.008096	0	0
ENST00000360066	CDK18	Q07002	ENSG00000117266	5129	4	62	-11.24	-0.54	49	-11.24	-0.54	0	0	0	0.043724	-0.007929	0.034556	-0.007929	0	0
ENST00000360105	NFIX	Q14938	ENSG00000008441	4784	6	319	-44.94	-2.6	248	-44.94	-2.6	0	0	0	0.076225	-0.010739	0.059259	-0.010739	0	0
ENST00000360184	DYNC1H1	Q14204	ENSG00000197102	1778	9	2	-0.84	-0.44	2	-0.84	-0.44	0	0	0	0.00034	-0.000143	0.00034	-0.000143	0	0
ENST00000360252	SUPT20H	Q8NEM7	ENSG00000102710	55578	9	4	-1.19	-0.32	4	-1.19	-0.32	0	0	0	0.010101	-0.003008	0.010101	-0.003008	0	0
ENST00000360265	AFAP1	Q8N556	ENSG00000196526	60312	9	119	-13.26	-0.57	83	-13.26	-0.57	0	0	0	0.023546	-0.002624	0.016423	-0.002624	0	0
ENST00000360270	MSN	P26038	ENSG00000147065	4478	1	116	-24.13	-0.83	91	-24.13	-0.83	0	0	0	0.056835	-0.011824	0.044586	-0.011824	0	0
ENST00000360295	SEZ6	Q53EL9	ENSG00000063015	124925	8	34	-3.16	-0.51	33	-3.16	-0.51	0	0	0	0.03235	-0.003008	0.031399	-0.003008	0	0
ENST00000360315	GATAD2A	Q86YP4	ENSG00000167491	54815	3	134	-18.1	-0.66	113	-18.1	-0.66	0	0	0	0.038728	-0.005231	0.032659	-0.005231	0	0
ENST00000360351	MAP2	P11137	ENSG00000078018	4133	8	175	-7.27	-0.23	75	-7.27	-0.23	0	0	0	0.046992	-0.001953	0.02014	-0.001953	0	0
ENST00000360409	NRP2	O60462	ENSG00000118257	8828	7	240	-27.73	-0.5	170	-27.73	-0.5	0	0	0	0.077973	-0.009008	0.055231	-0.009008	0	0
ENST00000360416	MYH10	P35580	ENSG00000133026	4628	1	105	-14.4	-0.61	91	-14.4	-0.61	0	0	0	0.065543	-0.008992	0.056804	-0.008992	0	0
ENST00000360472	PEA15	Q15121	ENSG00000162734	8682	1	167	-39.53	-0.81	128	-39.53	-0.81	0	0	0	0.08822	-0.020882	0.067618	-0.020882	0	0
ENST00000360535	CLIP3	Q96DZ5	ENSG00000105270	25999	9	36	-5.69	-0.42	34	-5.69	-0.42	0	0	0	0.023984	-0.003791	0.022652	-0.003791	0	0
ENST00000360566	RRM2	P31350	ENSG00000171848	6241	1	36	-10.64	-0.68	26	-10.64	-0.68	0	0	0	0.01769	-0.00523	0.012776	-0.00523	0	0
ENST00000360578	TPPP	O94811	ENSG00000171368	11076	9	89	-15.7	-0.63	74	-15.7	-0.63	0	0	0	0.016975	-0.002995	0.014114	-0.002995	0	0
ENST00000360586	WDHD1	O75717	ENSG00000198554	11169	1	14	-0.62	-0.25	6	-0.62	-0.25	0	0	0	0.005505	-0.000246	0.002359	-0.000246	0	0
ENST00000360663	PPP3CB	P16298	ENSG00000107758	5532	9	62	-12.24	-0.37	59	-12.24	-0.37	0	0	0	0.034122	-0.006736	0.032471	-0.006736	0	0
ENST00000360689	FUT8	Q9BYC5	ENSG00000033170	2530	1	83	-15.24	-0.76	66	-15.24	-0.76	0	0	0	0.048425	-0.00889	0.038506	-0.00889	0	0
ENST00000360700	ZNF711	Q9Y462	ENSG00000147180	7552	8	89	-20.8	-0.6	66	-20.8	-0.6	0	0	0	0.057905	-0.013532	0.042941	-0.013532	0	0
ENST00000360803	GTPBP4	Q9BZE4	ENSG00000107937	23560	5	5	-0.58	-0.16	5	-0.58	-0.16	0	0	0	0.001844	-0.000215	0.001844	-0.000215	0	0
ENST00000360820	SCYL2	Q6P3W7	ENSG00000136021	55681	9	32	-5.68	-0.36	27	-5.68	-0.36	0	0	0	0.012524	-0.002222	0.010568	-0.002222	0	0
ENST00000360822	CDK5RAP2	Q96SN8	ENSG00000136861	55755	2	2	-0.42	-0.26	2	-0.42	-0.26	0	0	0	0.005405	-0.001124	0.005405	-0.001124	0	0
ENST00000360864	DNAJC5	Q9H3Z4	ENSG00000101152	80331	9	119	-21.06	-0.81	77	-21.06	-0.81	0	0	0	0.026646	-0.004715	0.017241	-0.004715	0	0
ENST00000360929	SEZ6L	Q9BYH1	ENSG00000100095	23544	8	9	-2.23	-0.47	6	-2.23	-0.47	0	0	0	0.002724	-0.000674	0.001816	-0.000674	0	0
ENST00000360943	UBE2Z	Q9H832	ENSG00000159202	65264	8	115	-21.68	-0.55	104	-21.68	-0.55	0	0	0	0.05974	-0.011262	0.054026	-0.011262	0	0
ENST00000360947	ZNF219	Q9P2Y4	ENSG00000165804	51222	1	20	-3.89	-0.38	20	-3.89	-0.38	0	0	0	0.040568	-0.00789	0.040568	-0.00789	0	0
ENST00000361138	SMC5	Q8IY18	ENSG00000198887	23137	2	24	-3.27	-0.51	19	-3.27	-0.51	0	0	0	0.009375	-0.001277	0.007422	-0.001277	0	0
ENST00000361170	IQGAP3	Q86VI3	ENSG00000183856	128239	1	13	-2.98	-0.69	9	-2.98	-0.69	0	0	0	0.011993	-0.002749	0.008303	-0.002749	0	0
ENST00000361171	MVB12B	Q9H7P6	ENSG00000196814	89853	9	109	-15.09	-0.53	78	-15.09	-0.53	0	0	0	0.028828	-0.003991	0.020629	-0.003991	0	0
ENST00000361183	CAPZA2	P47755	ENSG00000198898	830	6	49	-11.48	-0.71	37	-11.48	-0.71	0	0	0	0.011708	-0.002742	0.008841	-0.002742	0	0
ENST00000361189	PJA2	O43164	ENSG00000198961	9867	8	126	-12.23	-0.75	81	-12.23	-0.75	0	0	0	0.049901	-0.004843	0.032079	-0.004843	0	0
ENST00000361198	LDB1	Q86U70	ENSG00000198728	8861	8	57	-7.32	-0.32	54	-7.32	-0.32	0	0	0	0.106343	-0.013664	0.100746	-0.013664	0	0
ENST00000361204	SREBF2	Q12772	ENSG00000198911	6721	7	38	-5.63	-0.32	34	-5.63	-0.32	0	0	0	0.023016	-0.003409	0.020594	-0.003409	0	0
ENST00000361216	ATP1A2	P50993	ENSG00000018625	477	1	81	-6.95	-0.36	55	-6.95	-0.36	0	0	0	0.035651	-0.00306	0.024208	-0.00306	0	0
ENST00000361246	CDC42BPB	Q9Y5S2	ENSG00000198752	9578	8	53	-4.45	-0.38	50	-4.45	-0.38	0	0	0	0.039671	-0.003329	0.037425	-0.003329	0	0
ENST00000361309	CD47	Q08722	ENSG00000196776	961	1	240	-33.65	-0.75	162	-33.65	-0.75	0	0	0	1.14286	-0.160219	0.771429	-0.160219	0	0
ENST00000361314	GPX7	Q96SL4	ENSG00000116157	2882	1	17	-6.97	-0.67	15	-6.97	-0.67	0	0	0	0.027027	-0.011083	0.023847	-0.011083	0	0
ENST00000361360	POU3F3	P20264	ENSG00000198914	5455	6	180	-24.73	-0.6	115	-24.73	-0.6	0	0	0	0.11509	-0.015812	0.073529	-0.015812	0	0
ENST00000361427	HMGN2	P05204	ENSG00000198830	3151	1	67	-15.32	-0.54	63	-15.32	-0.54	0	0	0	0.081016	-0.018524	0.076179	-0.018524	0	0
ENST00000361436	RPL12	P30050	ENSG00000197958	6136	3	1	-0.19	-0.19	1	-0.19	-0.19	0	0	0	0.02	-0.00386	0.02	-0.00386	0	0
ENST00000361470	MAGEE1	Q9HCI5	ENSG00000198934	57692	9	4	-0.32	-0.12	4	-0.32	-0.12	0	0	0	0.007246	-0.000576	0.007246	-0.000576	0	0
ENST00000361488	FAM110B	Q8TC76	ENSG00000169122	90362	8	120	-23.34	-0.65	94	-23.34	-0.65	0	0	0	0.082873	-0.016119	0.064917	-0.016119	0	0
ENST00000361505	PNP	P00491	ENSG00000198805	4860	3	23	-4.16	-0.35	17	-4.16	-0.35	0	0	0	0.046371	-0.008393	0.034274	-0.008393	0	0
ENST00000361524	ZNF521	Q96K83	ENSG00000198795	25925	4	133	-24.96	-0.53	121	-24.96	-0.53	0	0	0	0.168568	-0.031636	0.153359	-0.031636	0	0
ENST00000361565	IPO9	Q96P70	ENSG00000198700	55705	1	180	-14.3	-0.56	77	-14.3	-0.56	0	0	0	0.021837	-0.001735	0.009341	-0.001735	0	0
ENST00000361580	KIFAP3	Q92845	ENSG00000075945	22920	9	7	-1.33	-0.24	7	-1.33	-0.24	0	0	0	0.01983	-0.003779	0.01983	-0.003779	0	0
ENST00000361600	GPRASP1	Q5JY77	ENSG00000198932	9737	7	23	-6.16	-0.47	22	-6.16	-0.47	0	0	0	0.02335	-0.006249	0.022335	-0.006249	0	0
ENST00000361642	ZEB1	P37275	ENSG00000148516	6935	1	398	-57.43	-1.48	331	-57.43	-1.48	0	0	0	0.155956	-0.022504	0.129702	-0.022504	0	0
ENST00000361654	CLIP1	P30622	ENSG00000130779	6249	6	105	-26.28	-0.69	92	-26.28	-0.69	0	0	0	0.072614	-0.018172	0.063624	-0.018172	0	0
ENST00000361669	GRM3	Q14832	ENSG00000198822	2913	9	30	-7.58	-0.44	29	-7.58	-0.44	0	0	0	0.056391	-0.014248	0.054511	-0.014248	0	0
ENST00000361671	NAA35	Q5VZE5	ENSG00000135040	60560	8	76	-4.21	-0.31	38	-4.21	-0.31	0	0	0	0.222874	-0.012355	0.111437	-0.012355	0	0
ENST00000361737	ABLIM2	Q6H8Q1	ENSG00000163995	84448	9	6	-0.82	-0.18	6	-0.82	-0.18	0	0	0	0.003569	-0.000491	0.003569	-0.000491	0	0
ENST00000361740	CYB5R3	P00387	ENSG00000100243	1727	7	2	-1.32	-0.71	2	-1.32	-0.71	0	0	0	0.001033	-0.000682	0.001033	-0.000682	0	0
ENST00000361742	ISLR2	Q6UXK2	ENSG00000167178	57611	9	27	-4.48	-0.51	26	-4.48	-0.51	0	0	0	0.014892	-0.002472	0.014341	-0.002472	0	0
ENST00000361773	TGFB1I1	O43294	ENSG00000140682	7041	2	7	-2.46	-0.52	6	-2.46	-0.52	0	0	0	0.018088	-0.00637	0.015504	-0.00637	0	0
ENST00000361804	SMC3	Q9UQE7	ENSG00000108055	9126	2	48	-5.16	-0.35	38	-5.16	-0.35	0	0	0	0.142433	-0.0153	0.11276	-0.0153	0	0
ENST00000361874	DCTN1	Q14203	ENSG00000204843	1639	9	16	-2.12	-0.31	15	-2.12	-0.31	0	0	0	0.045977	-0.006106	0.043103	-0.006106	0	0
ENST00000361897	NOS1AP	O75052	ENSG00000198929	9722	5	69	-8.25	-0.45	45	-8.25	-0.45	0	0	0	0.022916	-0.002741	0.014945	-0.002741	0	0
ENST00000361937	INO80	Q9ULG1	ENSG00000128908	54617	8	257	-33.45	-1	184	-33.45	-1	0	0	0	0.190936	-0.024852	0.136701	-0.024852	0	0
ENST00000361951	DARS2	Q6PI48	ENSG00000117593	55157	1	9	-2.68	-0.44	9	-2.68	-0.44	0	0	0	0.010664	-0.003178	0.010664	-0.003178	0	0
ENST00000361952	ZNF830	Q96NB3	ENSG00000198783	91603	6	6	-2.39	-0.7	5	-2.39	-0.7	0	0	0	0.005489	-0.002187	0.004575	-0.002187	0	0
ENST00000362003	PCGF3	Q3KNV8	ENSG00000185619	10336	8	264	-55.96	-0.82	209	-55.96	-0.82	0	0	0	0.057844	-0.012262	0.045793	-0.012262	0	0
ENST00000362063	ZNF652	Q9Y2D9	ENSG00000198740	22834	9	825	-82.89	-0.88	451	-82.89	-0.88	0	0	0	0.21423	-0.021523	0.117112	-0.021523	0	0
ENST00000366539	AKT3	Q9Y243	ENSG00000117020	10000	9	447	-55.88	-0.89	299	-55.88	-0.89	0	0	0	0.128117	-0.016015	0.085698	-0.016015	0	0
ENST00000366542	CEP170	Q5SW79	ENSG00000143702	9859	8	113	-14.73	-0.37	99	-14.73	-0.37	0	0	0	0.05583	-0.007276	0.048913	-0.007276	0	0
ENST00000366577	MTR	Q99707	ENSG00000116984	4548	1	6	-1.2	-0.35	5	-1.2	-0.35	0	0	0	0.000946	-0.00019	0.000789	-0.00019	0	0
ENST00000366582	HEATR1	Q9H583	ENSG00000119285	55127	3	21	-3.81	-0.45	13	-3.81	-0.45	0	0	0	0.011053	-0.002004	0.006842	-0.002004	0	0
ENST00000366607	TOMM20	Q15388	ENSG00000173726	9804	8	49	-11.46	-0.63	38	-11.46	-0.63	0	0	0	0.017942	-0.004197	0.013914	-0.004197	0	0
ENST00000366628	NTPCR	Q9BSD7	ENSG00000135778	84284	4	37	-7.99	-0.7	30	-7.99	-0.7	0	0	0	0.006544	-0.001413	0.005306	-0.001413	0	0
ENST00000366630	SIPA1L2	Q9P2F8	ENSG00000116991	57568	7	60	-11.01	-0.34	53	-11.01	-0.34	0	0	0	0.051502	-0.009446	0.045494	-0.009446	0	0
ENST00000366641	EGLN1	Q9GZT9	ENSG00000135766	54583	9	119	-22.71	-0.65	84	-22.71	-0.65	0	0	0	0.044686	-0.008529	0.031543	-0.008529	0	0
ENST00000366663	C1orf198	Q9H425	ENSG00000119280	84886	2	47	-10.49	-0.48	39	-10.49	-0.48	0	0	0	0.017178	-0.003836	0.014254	-0.003836	0	0
ENST00000366672	GALNT2	Q10471	ENSG00000143641	2590	3	62	-11.83	-0.67	52	-11.83	-0.67	0	0	0	0.02323	-0.004434	0.019483	-0.004434	0	0
ENST00000366767	CDC42BPA	Q5VT25	ENSG00000143776	8476	8	170	-14.64	-0.61	126	-14.64	-0.61	0	0	0	0.038584	-0.003324	0.028597	-0.003324	0	0
ENST00000366794	PARP1	P09874	ENSG00000143799	142	1	12	-4.85	-0.66	11	-4.85	-0.66	0	0	0	0.015544	-0.006282	0.014249	-0.006282	0	0
ENST00000366844	ENAH	Q8N8S7	ENSG00000154380	55740	1	744	-72.23	-0.85	378	-72.23	-0.85	0	0	0	0.067989	-0.006601	0.034543	-0.006601	0	0
ENST00000366918	MARK1	Q9P0L2	ENSG00000116141	4139	8	241	-37.44	-0.81	157	-37.44	-0.81	0	0	0	0.104874	-0.016292	0.06832	-0.016292	0	0
ENST00000366922	IARS2	Q9NSE4	ENSG00000067704	55699	7	12	-2.43	-0.59	10	-2.43	-0.59	0	0	0	0.02934	-0.005936	0.02445	-0.005936	0	0
ENST00000366955	CENPF	P49454	ENSG00000117724	1063	1	41	-4.43	-0.54	24	-4.43	-0.54	0	0	0	0.051443	-0.005562	0.030113	-0.005562	0	0
ENST00000366958	PROX1	Q92786	ENSG00000117707	5629	2	556	-57.1	-0.73	359	-57.1	-0.73	0	0	0	0.102564	-0.010533	0.066224	-0.010533	0	0
ENST00000366997	LPGAT1	Q92604	ENSG00000123684	9926	9	340	-42.8	-0.88	197	-42.8	-0.88	0	0	0	0.052754	-0.006641	0.030566	-0.006641	0	0
ENST00000367005	RCOR3	Q9P2K3	ENSG00000117625	55758	2	59	-12.89	-0.55	44	-12.89	-0.55	0	0	0	0.022519	-0.004922	0.016794	-0.004922	0	0
ENST00000367033	PLXNA2	O75051	ENSG00000076356	5362	6	293	-20.67	-1.03	172	-20.67	-1.03	0	0	0	0.058553	-0.00413	0.034373	-0.00413	0	0
ENST00000367080	PFKFB2	O60825	ENSG00000123836	5208	9	28	-2.59	-0.43	18	-2.59	-0.43	0	0	0	0.005133	-0.000474	0.0033	-0.000474	0	0
ENST00000367139	RAB29	O14966	ENSG00000117280	8934	5	32	-6.04	-0.54	26	-6.04	-0.54	0	0	0	0.013565	-0.002559	0.011022	-0.002559	0	0
ENST00000367142	NUCKS1	Q9H1E3	ENSG00000069275	64710	4	342	-47.6	-0.74	208	-47.6	-0.74	0	0	0	0.062592	-0.008711	0.038067	-0.008711	0	0
ENST00000367166	TFB1M	Q8WVM0	ENSG00000029639	51106	5	1	-0.27	-0.27	1	-0.27	-0.27	0	0	0	0.00303	-0.000824	0.00303	-0.000824	0	0
ENST00000367178	SCAF8	Q9UPN6	ENSG00000213079	22828	5	89	-15.6	-0.59	69	-15.6	-0.59	0	0	0	0.133234	-0.023359	0.103293	-0.023359	0	0
ENST00000367218	ATP2B4	P23634	ENSG00000058668	493	3	216	-20.78	-0.68	135	-20.78	-0.68	0	0	0	0.047883	-0.004605	0.029927	-0.004605	0	0
ENST00000367249	CYB5R1	Q9UHQ9	ENSG00000159348	51706	8	26	-4.79	-0.71	21	-4.79	-0.71	0	0	0	0.039334	-0.00725	0.03177	-0.00725	0	0
ENST00000367255	SYNE1	Q8NF91	ENSG00000131018	23345	8	61	-8.58	-0.71	46	-8.58	-0.71	0	0	0	0.080795	-0.011364	0.060927	-0.011364	0	0
ENST00000367262	RABIF	P47224	ENSG00000183155	5877	9	40	-11.31	-0.92	23	-11.31	-0.92	0	0	0	0.019763	-0.005586	0.011364	-0.005586	0	0
ENST00000367274	UBE2T	Q9NPD8	ENSG00000077152	29089	1	47	-6.93	-0.79	30	-6.93	-0.79	0	0	0	0.259669	-0.038282	0.165746	-0.038282	0	0
ENST00000367294	ARMT1	Q9H993	ENSG00000146476	79624	4	37	-7.76	-0.56	33	-7.76	-0.56	0	0	0	0.037223	-0.007806	0.033199	-0.007806	0	0
ENST00000367321	MTHFD1L	Q6UB35	ENSG00000120254	25902	3	78	-12.52	-0.54	61	-12.52	-0.54	0	0	0	0.19697	-0.031614	0.15404	-0.031614	0	0
ENST00000367384	PCMT1	P22061	ENSG00000120265	5110	9	72	-21.16	-0.81	60	-21.16	-0.81	0	0	0	0.090566	-0.026614	0.075472	-0.026614	0	0
ENST00000367435	CDC73	Q6P1J9	ENSG00000134371	79577	1	659	-59.83	-1.04	260	-59.83	-1.04	0	0	0	0.160497	-0.01457	0.063322	-0.01457	0	0
ENST00000367478	TPR	P12270	ENSG00000047410	7175	1	66	-6.1	-0.49	42	-6.1	-0.49	0	0	0	0.028424	-0.002626	0.018088	-0.002626	0	0
ENST00000367498	IVNS1ABP	Q9Y6Y0	ENSG00000116679	10625	1	53	-15.62	-0.78	49	-15.62	-0.78	0	0	0	0.032121	-0.009466	0.029697	-0.009466	0	0
ENST00000367545	UTRN	P46939	ENSG00000152818	7402	1	78	-16.3	-0.51	58	-16.3	-0.51	0	0	0	0.038235	-0.007988	0.028431	-0.007988	0	0
ENST00000367590	XPR1	Q9UBH6	ENSG00000143324	9213	7	268	-32.22	-0.95	153	-32.22	-0.95	0	0	0	0.04331	-0.005206	0.024725	-0.005206	0	0
ENST00000367604	HIVEP2	P31629	ENSG00000010818	3097	9	166	-23.51	-0.64	150	-23.51	-0.64	0	0	0	0.101716	-0.014405	0.091912	-0.014405	0	0
ENST00000367619	SOAT1	P35610	ENSG00000057252	6646	1	51	-6.05	-0.44	33	-6.05	-0.44	0	0	0	0.010115	-0.001201	0.006545	-0.001201	0	0
ENST00000367630	VTA1	Q9NP79	ENSG00000009844	51534	9	72	-11	-0.57	40	-11	-0.57	0	0	0	0.011903	-0.001819	0.006613	-0.001819	0	0
ENST00000367658	HECA	Q9UBI9	ENSG00000112406	51696	8	79	-11.27	-0.52	54	-11.27	-0.52	0	0	0	0.021351	-0.003047	0.014595	-0.003047	0	0
ENST00000367660	ABRACL	Q9P1F3	ENSG00000146386	58527	7	13	-6.27	-0.99	7	-6.27	-0.99	0	0	0	0.032338	-0.015604	0.017413	-0.015604	0	0
ENST00000367696	RC3H1	Q5TC82	ENSG00000135870	149041	5	504	-27.52	-0.6	301	-27.52	-0.6	0	0	0	0.067111	-0.003665	0.04008	-0.003665	0	0
ENST00000367701	ZBTB37	Q5TC79	ENSG00000185278	84614	8	719	-45.1	-0.72	222	-45.1	-0.72	0	0	0	0.041255	-0.002588	0.012738	-0.002588	0	0
ENST00000367731	DNM3	Q9UQ16	ENSG00000197959	26052	9	123	-16.16	-0.68	77	-16.16	-0.68	0	0	0	0.02521	-0.003313	0.015782	-0.003313	0	0
ENST00000367742	PRRC2C	Q9Y520	ENSG00000117523	23215	4	93	-10.39	-0.53	80	-10.39	-0.53	0	0	0	0.055789	-0.006232	0.04799	-0.006232	0	0
ENST00000367816	ATP1B1	P05026	ENSG00000143153	481	9	209	-52.22	-0.85	201	-52.22	-0.85	0	0	0	0.178632	-0.044631	0.171795	-0.044631	0	0
ENST00000367833	TIPRL	O75663	ENSG00000143155	261726	9	10	-3.51	-0.49	10	-3.51	-0.49	0	0	0	0.004829	-0.001694	0.004829	-0.001694	0	0
ENST00000367843	DCAF6	Q58WW2	ENSG00000143164	55827	9	31	-13.8	-1.04	31	-13.8	-1.04	0	0	0	0.075426	-0.033577	0.075426	-0.033577	0	0
ENST00000367846	MPC2	O95563	ENSG00000143158	25874	7	1	-0.35	-0.35	1	-0.35	-0.35	0	0	0	0.000626	-0.000219	0.000626	-0.000219	0	0
ENST00000367866	POU2F1	P14859	ENSG00000143190	5451	2	749	-50.77	-1.44	355	-50.77	-1.44	0	0	0	0.064916	-0.0044	0.030768	-0.0044	0	0
ENST00000367874	TADA1	Q96BN2	ENSG00000152382	117143	9	65	-17.56	-0.77	60	-17.56	-0.77	0	0	0	0.061321	-0.016568	0.056604	-0.016568	0	0
ENST00000367875	POGK	Q9P215	ENSG00000143157	57645	5	125	-18.56	-1.25	86	-18.56	-1.25	0	0	0	0.030735	-0.004564	0.021146	-0.004564	0	0
ENST00000367889	MGST3	O14880	ENSG00000143198	4259	9	9	-3.25	-0.74	9	-3.25	-0.74	0	0	0	0.07563	-0.027345	0.07563	-0.027345	0	0
ENST00000367900	NUF2	Q9BZD4	ENSG00000143228	83540	1	3	-1.31	-0.58	3	-1.31	-0.58	0	0	0	0.010067	-0.004383	0.010067	-0.004383	0	0
ENST00000367941	STX7	O15400	ENSG00000079950	8417	9	378	-35.17	-1.27	153	-35.17	-1.27	0	0	0	0.025379	-0.002361	0.010273	-0.002361	0	0
ENST00000367943	DUSP12	Q9UNI6	ENSG00000081721	11266	9	3	-0.67	-0.53	2	-0.67	-0.53	0	0	0	0.013761	-0.003055	0.009174	-0.003055	0	0
ENST00000367987	TOMM40L	Q969M1	ENSG00000158882	84134	9	62	-10.45	-0.88	30	-10.45	-0.88	0	0	0	0.040629	-0.00685	0.019659	-0.00685	0	0
ENST00000368020	USF1	P22415	ENSG00000158773	7391	9	15	-5.92	-0.79	14	-5.92	-0.79	0	0	0	0.022321	-0.008817	0.020833	-0.008817	0	0
ENST00000368061	VANGL2	Q9ULK5	ENSG00000162738	57216	4	148	-22.68	-0.57	123	-22.68	-0.57	0	0	0	0.044808	-0.006868	0.037239	-0.006868	0	0
ENST00000368072	PEX19	P40855	ENSG00000162735	5824	1	48	-10.97	-0.67	38	-10.97	-0.67	0	0	0	0.017505	-0.004	0.013858	-0.004	0	0
ENST00000368073	DCAF8	Q5TAQ9	ENSG00000132716	50717	1	84	-15.61	-0.47	74	-15.61	-0.47	0	0	0	0.044681	-0.008304	0.039362	-0.008304	0	0
ENST00000368096	TAGLN2	P37802	ENSG00000158710	8407	2	59	-19.31	-1.15	49	-19.31	-1.15	0	0	0	0.08477	-0.027749	0.070402	-0.027749	0	0
ENST00000368125	CADM3	Q8N126	ENSG00000162706	57863	9	120	-16.89	-0.88	91	-16.89	-0.88	0	0	0	0.050125	-0.007057	0.038012	-0.007057	0	0
ENST00000368279	PMF1	Q6P1K2	ENSG00000160783	11243	1	6	-2.97	-0.73	6	-2.97	-0.73	0	0	0	0.013158	-0.006522	0.013158	-0.006522	0	0
ENST00000368315	ARHGEF2	Q92974	ENSG00000116584	9181	6	47	-9.85	-0.71	44	-9.85	-0.71	0	0	0	0.0551	-0.011546	0.051583	-0.011546	0	0
ENST00000368465	PBXIP1	Q96AQ6	ENSG00000163346	57326	1	26	-6.24	-0.78	21	-6.24	-0.78	0	0	0	0.02734	-0.006563	0.022082	-0.006563	0	0
ENST00000368498	GOPC	Q9HD26	ENSG00000047932	57120	8	116	-16.67	-0.73	78	-16.67	-0.73	0	0	0	0.038822	-0.005579	0.026104	-0.005579	0	0
ENST00000368575	RAB13	P51153	ENSG00000143545	5872	1	29	-8.91	-0.94	23	-8.91	-0.94	0	0	0	0.064302	-0.019754	0.050998	-0.019754	0	0
ENST00000368636	BNIP3	Q12983	ENSG00000176171	664	4	29	-9.06	-0.91	23	-9.06	-0.91	0	0	0	0.013996	-0.004372	0.0111	-0.004372	0	0
ENST00000368648	EBF3	Q9H4W6	ENSG00000108001	253738	7	253	-44.62	-0.6	234	-44.62	-0.6	0	0	0	0.095508	-0.016843	0.088335	-0.016843	0	0
ENST00000368655	GATAD2B	Q8WXI9	ENSG00000143614	57459	6	417	-45.3	-1.39	276	-45.3	-1.39	0	0	0	0.076444	-0.008305	0.050596	-0.008305	0	0
ENST00000368682	FYN	P06241	ENSG00000010810	2534	6	112	-22.98	-0.52	93	-22.98	-0.52	0	0	0	0.079433	-0.016298	0.065957	-0.016298	0	0
ENST00000368694	CHTOP	Q9Y3Y2	ENSG00000160679	26097	8	30	-8.37	-0.66	22	-8.37	-0.66	0	0	0	0.028846	-0.008045	0.021154	-0.008045	0	0
ENST00000368704	S100A16	Q96FQ6	ENSG00000188643	140576	1	10	-2.11	-0.36	8	-2.11	-0.36	0	0	0	0.015361	-0.003241	0.012289	-0.003241	0	0
ENST00000368865	BUB3	O43684	ENSG00000154473	9184	2	17	-2.75	-0.47	10	-2.75	-0.47	0	0	0	0.002562	-0.000414	0.001507	-0.000414	0	0
ENST00000368868	SELENBP1	Q13228	ENSG00000143416	8991	1	2	-0.74	-0.38	2	-0.74	-0.38	0	0	0	0.008197	-0.003016	0.008197	-0.003016	0	0
ENST00000368874	PI4KB	Q9UBF8	ENSG00000143393	5298	8	52	-6.31	-0.31	52	-6.31	-0.31	0	0	0	0.049149	-0.005965	0.049149	-0.005965	0	0
ENST00000368886	IKZF5	Q9H5V7	ENSG00000095574	64376	2	83	-16.98	-0.66	70	-16.98	-0.66	0	0	0	0.02788	-0.005705	0.023514	-0.005705	0	0
ENST00000368890	PIP5K1A	Q99755	ENSG00000143398	8394	1	37	-6.02	-0.49	30	-6.02	-0.49	0	0	0	0.022169	-0.003606	0.017975	-0.003606	0	0
ENST00000368908	LYSMD1	Q96S90	ENSG00000163155	388695	9	37	-11.19	-0.73	33	-11.19	-0.73	0	0	0	0.032542	-0.009844	0.029024	-0.009844	0	0
ENST00000368911	CDK19	Q9BWU1	ENSG00000155111	23097	9	329	-52.04	-0.98	208	-52.04	-0.98	0	0	0	0.072149	-0.011413	0.045614	-0.011413	0	0
ENST00000368921	MLLT11	Q13015	ENSG00000213190	10962	9	16	-5.17	-0.58	14	-5.17	-0.58	0	0	0	0.015952	-0.00516	0.013958	-0.00516	0	0
ENST00000368932	CDC40	O60508	ENSG00000168438	51362	5	56	-10.36	-0.46	42	-10.36	-0.46	0	0	0	0.02673	-0.004944	0.020048	-0.004944	0	0
ENST00000368969	SETDB1	Q15047	ENSG00000143379	9869	5	7	-2.31	-0.46	7	-2.31	-0.46	0	0	0	0.018277	-0.006037	0.018277	-0.006037	0	0
ENST00000368984	HTRA1	Q92743	ENSG00000166033	5654	2	22	-2.58	-0.34	18	-2.58	-0.34	0	0	0	0.039855	-0.004665	0.032609	-0.004665	0	0
ENST00000368986	NR2E1	Q9Y466	ENSG00000112333	7101	1	25	-5.54	-0.36	23	-5.54	-0.36	0	0	0	0.018532	-0.004107	0.01705	-0.004107	0	0
ENST00000369023	NSMCE4A	Q9NXX6	ENSG00000107672	54780	1	25	-10.09	-0.92	25	-10.09	-0.92	0	0	0	0.13369	-0.053952	0.13369	-0.053952	0	0
ENST00000369042	BEND3	Q5T5X7	ENSG00000178409	57673	1	256	-32.53	-1.01	193	-32.53	-1.01	0	0	0	0.072624	-0.00923	0.054752	-0.00923	0	0
ENST00000369085	BAG3	O95817	ENSG00000151929	9531	3	4	-2.86	-0.73	4	-2.86	-0.73	0	0	0	0.007407	-0.005296	0.007407	-0.005296	0	0
ENST00000369110	PREP	P48147	ENSG00000085377	5550	9	6	-1.72	-0.37	6	-1.72	-0.37	0	0	0	0.010309	-0.002952	0.010309	-0.002952	0	0
ENST00000369124	PLEKHO1	Q53GL0	ENSG00000023902	51177	8	169	-17.73	-0.77	93	-17.73	-0.77	0	0	0	0.310092	-0.032528	0.170642	-0.032528	0	0
ENST00000369130	VPS45	Q9NRW7	ENSG00000136631	11311	8	11	-2.93	-0.52	9	-2.93	-0.52	0	0	0	0.020599	-0.005487	0.016854	-0.005487	0	0
ENST00000369144	EIF3A	Q14152	ENSG00000107581	8661	3	164	-16.69	-0.44	120	-16.69	-0.44	0	0	0	0.06914	-0.007037	0.05059	-0.007037	0	0
ENST00000369146	SV2A	Q7L0J3	ENSG00000159164	9900	9	150	-20.99	-0.56	127	-20.99	-0.56	0	0	0	0.088287	-0.012353	0.07475	-0.012353	0	0
ENST00000369162	ASCC3	Q8N3C0	ENSG00000112249	10973	3	11	-2.24	-0.3	10	-2.24	-0.3	0	0	0	0.009205	-0.001872	0.008368	-0.001872	0	0
ENST00000369209	HSPA12A	O43301	ENSG00000165868	259217	8	113	-9.08	-0.51	59	-9.08	-0.51	0	0	0	0.031459	-0.002528	0.016425	-0.002528	0	0
ENST00000369248	FAM160B1	Q5W0V3	ENSG00000151553	57700	9	186	-22.92	-0.6	121	-22.92	-0.6	0	0	0	0.058491	-0.007207	0.03805	-0.007207	0	0
ENST00000369258	CHD1L	Q86WJ1	ENSG00000131778	9557	1	2	-0.56	-0.29	2	-0.56	-0.29	0	0	0	0.007812	-0.002203	0.007812	-0.002203	0	0
ENST00000369278	UFL1	O94874	ENSG00000014123	23376	1	7	-1.2	-0.29	5	-1.2	-0.29	0	0	0	0.003941	-0.000676	0.002815	-0.000676	0	0
ENST00000369301	NHLRC2	Q8NBF2	ENSG00000196865	374354	2	180	-13.47	-0.62	83	-13.47	-0.62	0	0	0	0.020783	-0.001555	0.009583	-0.001555	0	0
ENST00000369303	EPHA7	Q15375	ENSG00000135333	2045	7	302	-58.37	-0.78	268	-58.37	-0.78	0	0	0	0.088589	-0.017123	0.078615	-0.017123	0	0
ENST00000369331	CASP7	P55210	ENSG00000165806	840	1	27	-6.74	-0.54	23	-6.74	-0.54	0	0	0	0.018305	-0.004567	0.015593	-0.004567	0	0
ENST00000369409	PHGDH	O43175	ENSG00000092621	26227	1	4	-1.84	-0.56	4	-1.84	-0.56	0	0	0	0.020305	-0.009335	0.020305	-0.009335	0	0
ENST00000369426	WARS2	Q9UGM6	ENSG00000116874	10352	6	45	-11.64	-1.21	40	-11.64	-1.21	0	0	0	0.020959	-0.00542	0.018631	-0.00542	0	0
ENST00000369443	GDAP2	Q9NXN4	ENSG00000196505	54834	6	152	-25.15	-0.87	75	-25.15	-0.87	0	0	0	0.021448	-0.003549	0.010583	-0.003549	0	0
ENST00000369452	SHOC2	Q9UQ13	ENSG00000108061	8036	9	316	-41.57	-0.9	191	-41.57	-0.9	0	0	0	0.170626	-0.022449	0.103132	-0.022449	0	0
ENST00000369454	RAB39B	Q96DA2	ENSG00000155961	116442	9	110	-21.71	-0.87	81	-21.71	-0.87	0	0	0	0.042885	-0.008463	0.031579	-0.008463	0	0
ENST00000369466	TTF2	Q9UNY4	ENSG00000116830	8458	1	43	-3.29	-0.38	24	-3.29	-0.38	0	0	0	0.007249	-0.000555	0.004046	-0.000555	0	0
ENST00000369485	RNGTT	O60942	ENSG00000111880	8732	8	58	-10.53	-0.65	38	-10.53	-0.65	0	0	0	0.023673	-0.0043	0.01551	-0.0043	0	0
ENST00000369486	IGSF3	O75054	ENSG00000143061	3321	9	202	-20.49	-0.63	131	-20.49	-0.63	0	0	0	0.069511	-0.00705	0.045079	-0.00705	0	0
ENST00000369501	CNR1	P21554	ENSG00000118432	1268	8	132	-12.74	-0.43	81	-12.74	-0.43	0	0	0	0.033041	-0.003189	0.020275	-0.003189	0	0
ENST00000369534	MPP1	Q00013	ENSG00000130830	4354	5	25	-10.84	-0.84	25	-10.84	-0.84	0	0	0	0.050403	-0.021859	0.050403	-0.021859	0	0
ENST00000369536	RARS2	Q5T160	ENSG00000146282	57038	5	1	-0.44	-0.44	1	-0.44	-0.44	0	0	0	0.026316	-0.011632	0.026316	-0.011632	0	0
ENST00000369550	DKC1	O60832	ENSG00000130826	1736	1	3	-0.44	-0.16	3	-0.44	-0.16	0	0	0	0.003636	-0.000527	0.003636	-0.000527	0	0
ENST00000369577	ZNF292	O60281	ENSG00000188994	23036	5	364	-35.38	-0.88	244	-35.38	-0.88	0	0	0	0.151793	-0.014756	0.101751	-0.014756	0	0
ENST00000369626	SLC16A1	P53985	ENSG00000155380	6566	1	74	-17.35	-0.9	62	-17.35	-0.9	0	0	0	0.03615	-0.008478	0.030288	-0.008478	0	0
ENST00000369697	KCND3	Q9UK17	ENSG00000171385	3752	8	342	-31.04	-0.59	196	-31.04	-0.59	0	0	0	0.063123	-0.005729	0.036176	-0.005729	0	0
ENST00000369722	ATP5PB	P24539	ENSG00000116459	515	7	36	-7.56	-0.68	20	-7.56	-0.68	0	0	0	0.020202	-0.004244	0.011223	-0.004244	0	0
ENST00000369762	ATP6AP1	Q15904	ENSG00000071553	537	9	2	-0.36	-0.22	2	-0.36	-0.22	0	0	0	0.003185	-0.00058	0.003185	-0.00058	0	0
ENST00000369774	SH3PXD2A	Q5TCZ1	ENSG00000107957	9644	8	649	-38.23	-0.8	383	-38.23	-0.8	0	0	0	0.083291	-0.004906	0.049153	-0.004906	0	0
ENST00000369795	STRIP1	Q5VSL9	ENSG00000143093	85369	9	39	-4.98	-0.32	29	-4.98	-0.32	0	0	0	0.053279	-0.006799	0.039617	-0.006799	0	0
ENST00000369799	AHCYL1	O43865	ENSG00000168710	10768	3	133	-26.95	-0.88	103	-26.95	-0.88	0	0	0	0.064626	-0.013096	0.050049	-0.013096	0	0
ENST00000369816	ELOVL4	Q9GZR5	ENSG00000118402	6785	9	86	-23.41	-0.82	71	-23.41	-0.82	0	0	0	0.047804	-0.013013	0.039466	-0.013013	0	0
ENST00000369825	ATP5MD	Q96IX5	ENSG00000173915	84833	7	5	-1.89	-0.78	5	-1.89	-0.78	0	0	0	0.037879	-0.014295	0.037879	-0.014295	0	0
ENST00000369833	GSTM4	Q03013	ENSG00000168765	2948	1	6	-1.14	-0.25	6	-1.14	-0.25	0	0	0	0.002429	-0.00046	0.002429	-0.00046	0	0
ENST00000369838	SH3BGRL2	Q9UJC5	ENSG00000198478	83699	8	153	-33.08	-0.88	90	-33.08	-0.88	0	0	0	0.036841	-0.007964	0.021671	-0.007964	0	0
ENST00000369849	INA	Q16352	ENSG00000148798	9118	9	47	-11.52	-0.68	38	-11.52	-0.68	0	0	0	0.027893	-0.006839	0.022552	-0.006839	0	0
ENST00000369880	AS3MT	Q9HBK9	ENSG00000214435	57412	1	33	-7.79	-0.8	23	-7.79	-0.8	0	0	0	0.027454	-0.00648	0.019135	-0.00648	0	0
ENST00000369888	ZNF512B	Q96KM6	ENSG00000196700	57473	8	139	-16.95	-0.85	107	-16.95	-0.85	0	0	0	0.043587	-0.005316	0.033553	-0.005316	0	0
ENST00000369981	MYO6	Q9UM54	ENSG00000196586	4646	4	92	-9.35	-0.46	59	-9.35	-0.46	0	0	0	0.020318	-0.002065	0.01303	-0.002065	0	0
ENST00000370008	STXBP3	O00186	ENSG00000116266	6814	1	9	-3.14	-0.45	8	-3.14	-0.45	0	0	0	0.013804	-0.00481	0.01227	-0.00481	0	0
ENST00000370053	STMN3	Q9NZ72	ENSG00000197457	50861	9	22	-3.98	-0.47	16	-3.98	-0.47	0	0	0	0.013472	-0.00244	0.009798	-0.00244	0	0
ENST00000370060	L1CAM	P32004	ENSG00000198910	3897	9	53	-6.41	-0.33	49	-6.41	-0.33	0	0	0	0.046007	-0.005562	0.042535	-0.005562	0	0
ENST00000370081	COX7A2	P14406	ENSG00000112695	1347	9	2	-0.25	-0.14	2	-0.25	-0.14	0	0	0	0.007752	-0.000977	0.007752	-0.000977	0	0
ENST00000370092	IDH3G	P51553	ENSG00000067829	3421	8	14	-1.79	-0.19	13	-1.79	-0.19	0	0	0	0.036269	-0.00464	0.033679	-0.00464	0	0
ENST00000370110	NPM3	O75607	ENSG00000107833	10360	4	7	-2.72	-0.63	6	-2.72	-0.63	0	0	0	0.021875	-0.008497	0.01875	-0.008497	0	0
ENST00000370128	RTCA	O00442	ENSG00000137996	8634	9	17	-7.76	-0.93	15	-7.76	-0.93	0	0	0	0.013407	-0.006117	0.01183	-0.006117	0	0
ENST00000370132	DBT	P11182	ENSG00000137992	1629	6	46	-5.14	-0.66	21	-5.14	-0.66	0	0	0	0.004926	-0.00055	0.002249	-0.00055	0	0
ENST00000370179	PPDPF	Q9H3Y8	ENSG00000125534	79144	6	8	-2.35	-0.59	6	-2.35	-0.59	0	0	0	0.024242	-0.007112	0.018182	-0.007112	0	0
ENST00000370206	CNN3	Q15417	ENSG00000117519	1266	1	101	-34.93	-0.66	94	-34.93	-0.66	0	0	0	0.127204	-0.043994	0.118388	-0.043994	0	0
ENST00000370238	GCLM	P48507	ENSG00000023909	2730	2	93	-19.67	-0.9	66	-19.67	-0.9	0	0	0	0.024551	-0.005193	0.017423	-0.005193	0	0
ENST00000370274	NSDHL	Q15738	ENSG00000147383	50814	4	4	-1.08	-0.57	3	-1.08	-0.57	0	0	0	0.006494	-0.00176	0.00487	-0.00176	0	0
ENST00000370314	GABRA3	P34903	ENSG00000011677	2556	7	39	-10.2	-0.77	34	-10.2	-0.77	0	0	0	0.019529	-0.005107	0.017026	-0.005107	0	0
ENST00000370339	YTHDF1	Q9BYJ9	ENSG00000149658	54915	8	12	-4.76	-0.59	12	-4.76	-0.59	0	0	0	0.00936	-0.003715	0.00936	-0.003715	0	0
ENST00000370355	SCD	O00767	ENSG00000099194	6319	4	111	-17.75	-0.75	81	-17.75	-0.75	0	0	0	0.028432	-0.004547	0.020748	-0.004547	0	0
ENST00000370396	MTM1	Q13496	ENSG00000171100	4534	1	11	-3.54	-0.4	11	-3.54	-0.4	0	0	0	0.006358	-0.002045	0.006358	-0.002045	0	0
ENST00000370440	ZNF644	Q9H582	ENSG00000122482	84146	2	185	-37.12	-0.64	149	-37.12	-0.64	0	0	0	0.123087	-0.024695	0.099135	-0.024695	0	0
ENST00000370447	ZNF326	Q5BKZ1	ENSG00000162664	284695	8	24	-5	-0.54	12	-5	-0.54	0	0	0	0.003064	-0.000638	0.001532	-0.000638	0	0
ENST00000370455	SMAP1	Q8IYB5	ENSG00000112305	60682	9	79	-23.89	-0.61	68	-23.89	-0.61	0	0	0	0.046912	-0.014188	0.04038	-0.014188	0	0
ENST00000370471	FMR1	Q06787	ENSG00000102081	2332	6	315	-64.29	-0.85	247	-64.29	-0.85	0	0	0	0.137856	-0.028135	0.108096	-0.028135	0	0
ENST00000370521	PKN2	Q16513	ENSG00000065243	5586	1	199	-32.09	-0.8	143	-32.09	-0.8	0	0	0	0.070819	-0.01142	0.05089	-0.01142	0	0
ENST00000370536	SOX3	P41225	ENSG00000134595	6658	1	11	-2.07	-0.39	11	-2.07	-0.39	0	0	0	0.014905	-0.00281	0.014905	-0.00281	0	0
ENST00000370544	LMO4	P61968	ENSG00000143013	8543	6	122	-24.5	-1.08	86	-24.5	-1.08	0	0	0	0.02954	-0.005933	0.020823	-0.005933	0	0
ENST00000370558	SH3GLB1	Q9Y371	ENSG00000097033	51100	1	169	-29.13	-1.12	92	-29.13	-1.12	0	0	0	0.034128	-0.005883	0.018578	-0.005883	0	0
ENST00000370580	BCL10	O95999	ENSG00000142867	8915	5	42	-6.99	-1.05	25	-6.99	-1.05	0	0	0	0.022654	-0.003769	0.013484	-0.003769	0	0
ENST00000370620	ARHGEF6	Q15052	ENSG00000129675	9459	2	71	-8.82	-0.57	47	-8.82	-0.57	0	0	0	0.028571	-0.00355	0.018913	-0.00355	0	0
ENST00000370645	GNG5	P63218	ENSG00000174021	2787	1	21	-13.73	-0.95	21	-13.73	-0.95	0	0	0	0.085366	-0.055813	0.085366	-0.055813	0	0
ENST00000370689	PRKACB	P22694	ENSG00000142875	5567	9	201	-40.02	-0.9	152	-40.02	-0.9	0	0	0	0.062891	-0.012521	0.047559	-0.012521	0	0
ENST00000370693	BAG2	O95816	ENSG00000112208	9532	2	99	-18.45	-0.98	45	-18.45	-0.98	0	0	0	0.017535	-0.003267	0.00797	-0.003267	0	0
ENST00000370698	SLC9A6	Q92581	ENSG00000198689	10479	9	81	-19.87	-0.98	66	-19.87	-0.98	0	0	0	0.03179	-0.007798	0.025903	-0.007798	0	0
ENST00000370708	ZNF451	Q9Y4E5	ENSG00000112200	26036	5	190	-18.13	-0.63	99	-18.13	-0.63	0	0	0	0.024925	-0.002378	0.012987	-0.002378	0	0
ENST00000370828	GPC4	O75487	ENSG00000076716	2239	1	187	-27.85	-0.56	124	-27.85	-0.56	0	0	0	0.067582	-0.010065	0.044814	-0.010065	0	0
ENST00000370836	HS6ST2	Q96MM7	ENSG00000171004	90161	4	43	-4.76	-0.45	25	-4.76	-0.45	0	0	0	0.019457	-0.002152	0.011312	-0.002152	0	0
ENST00000370841	ACADM	P11310	ENSG00000117054	34	2	5	-2.11	-0.54	5	-2.11	-0.54	0	0	0	0.005441	-0.002299	0.005441	-0.002299	0	0
ENST00000370950	SRSF11	Q05519	ENSG00000116754	9295	5	74	-17.4	-0.55	65	-17.4	-0.55	0	0	0	0.032889	-0.007735	0.028889	-0.007735	0	0
ENST00000370978	ZNF280C	Q8ND82	ENSG00000056277	55609	1	230	-27.4	-0.65	169	-27.4	-0.65	0	0	0	0.101366	-0.012074	0.074482	-0.012074	0	0
ENST00000370982	GNG12	Q9UBI6	ENSG00000172380	55970	3	81	-26.74	-1.22	61	-26.74	-1.22	0	0	0	0.020311	-0.006706	0.015296	-0.006706	0	0
ENST00000370992	RRP12	Q5JTH9	ENSG00000052749	23223	5	5	-1.13	-0.35	5	-1.13	-0.35	0	0	0	0.012658	-0.002866	0.012658	-0.002866	0	0
ENST00000370994	SERBP1	Q8NC51	ENSG00000142864	26135	4	245	-30.29	-0.74	173	-30.29	-0.74	0	0	0	0.04537	-0.00561	0.032037	-0.00561	0	0
ENST00000371045	PDE4B	Q07343	ENSG00000184588	5142	5	105	-22.11	-0.73	93	-22.11	-0.73	0	0	0	0.055147	-0.011613	0.048845	-0.011613	0	0
ENST00000371072	RAVER2	Q9HCJ3	ENSG00000162437	55225	1	128	-30.12	-0.96	107	-30.12	-0.96	0	0	0	0.056889	-0.013387	0.047556	-0.013387	0	0
ENST00000371075	GNAS	Q5JWF2	ENSG00000087460	2778	9	39	-13.07	-1.01	39	-13.07	-1.01	0	0	0	0.026767	-0.008973	0.026767	-0.008973	0	0
ENST00000371084	PGM1	P36871	ENSG00000079739	5236	1	25	-7.99	-0.59	22	-7.99	-0.59	0	0	0	0.04363	-0.013944	0.038394	-0.013944	0	0
ENST00000371103	LCOR	Q96JN0	ENSG00000196233	84458	7	1242	-129.61	-1.27	732	-129.61	-1.27	0	0	0	0.14574	-0.015209	0.085895	-0.015209	0	0
ENST00000371113	OCRL	Q01968	ENSG00000122126	4952	8	89	-12.32	-0.77	69	-12.32	-0.77	0	0	0	0.038797	-0.005372	0.030078	-0.005372	0	0
ENST00000371121	SMARCA1	P28370	ENSG00000102038	6594	1	48	-9.96	-0.43	46	-9.96	-0.43	0	0	0	0.15047	-0.031226	0.144201	-0.031226	0	0
ENST00000371160	STAG2	Q8N3U4	ENSG00000101972	10735	1	173	-32.72	-1.08	156	-32.72	-1.08	0	0	0	0.083899	-0.015869	0.075655	-0.015869	0	0
ENST00000371199	XIAP	P98170	ENSG00000101966	331	5	425	-33.89	-0.64	251	-33.89	-0.64	0	0	0	0.062491	-0.004983	0.036906	-0.004983	0	0
ENST00000371208	HOOK1	Q9UJC3	ENSG00000134709	51361	7	78	-11.74	-0.67	56	-11.74	-0.67	0	0	0	0.022834	-0.003437	0.016393	-0.003437	0	0
ENST00000371227	SORBS1	Q9BX66	ENSG00000095637	10580	6	92	-9.71	-0.53	69	-9.71	-0.53	0	0	0	0.027955	-0.002952	0.020966	-0.002952	0	0
ENST00000371250	PLPP3	O14495	ENSG00000162407	8613	1	388	-59.51	-0.82	284	-59.51	-0.82	0	0	0	0.214721	-0.032934	0.157167	-0.032934	0	0
ENST00000371269	DHCR24	Q15392	ENSG00000116133	1718	4	59	-9.64	-0.43	45	-9.64	-0.43	0	0	0	0.022666	-0.003701	0.017288	-0.003701	0	0
ENST00000371317	MCTS1	Q9ULC4	ENSG00000232119	28985	9	119	-16.26	-0.62	68	-16.26	-0.62	0	0	0	0.545872	-0.074569	0.311927	-0.074569	0	0
ENST00000371361	NOC3L	Q8WTT2	ENSG00000173145	64318	1	4	-1.14	-0.3	4	-1.14	-0.3	0	0	0	0.004193	-0.001197	0.004193	-0.001197	0	0
ENST00000371384	FAM210B	Q96KR6	ENSG00000124098	116151	5	60	-17.74	-0.77	51	-17.74	-0.77	0	0	0	0.025221	-0.007457	0.021438	-0.007457	0	0
ENST00000371410	NKAP	Q8N5F7	ENSG00000101882	79576	4	153	-15.07	-0.54	99	-15.07	-0.54	0	0	0	0.033619	-0.003311	0.021753	-0.003311	0	0
ENST00000371471	ZNF217	O75362	ENSG00000171940	7764	1	141	-30.12	-0.6	135	-30.12	-0.6	0	0	0	0.063342	-0.013531	0.060647	-0.013531	0	0
ENST00000371514	SCP2	P22307	ENSG00000116171	6342	1	21	-3.6	-0.62	11	-3.6	-0.62	0	0	0	0.020958	-0.003598	0.010978	-0.003598	0	0
ENST00000371527	NKRF	O15226	ENSG00000186416	55922	9	178	-21.15	-0.66	113	-21.15	-0.66	0	0	0	0.175542	-0.020857	0.11144	-0.020857	0	0
ENST00000371538	COA7	Q96BR5	ENSG00000162377	65260	9	21	-3.72	-0.47	16	-3.72	-0.47	0	0	0	0.006418	-0.001138	0.00489	-0.001138	0	0
ENST00000371588	DPM1	O60762	ENSG00000000419	8813	1	27	-5.63	-0.74	17	-5.63	-0.74	0	0	0	0.100746	-0.021004	0.063433	-0.021004	0	0
ENST00000371589	MAN1B1	Q9UKM7	ENSG00000177239	11253	8	16	-4.01	-0.68	14	-4.01	-0.68	0	0	0	0.026711	-0.006688	0.023372	-0.006688	0	0
ENST00000371591	ZFYVE9	O95405	ENSG00000157077	9372	9	141	-29.8	-0.73	96	-29.8	-0.73	0	0	0	0.301282	-0.063673	0.205128	-0.063673	0	0
ENST00000371621	PTPN1	P18031	ENSG00000196396	5770	9	108	-18.03	-0.48	79	-18.03	-0.48	0	0	0	0.042705	-0.00713	0.031238	-0.00713	0	0
ENST00000371626	TXNDC12	O95881	ENSG00000117862	51060	1	9	-2.82	-0.42	9	-2.82	-0.42	0	0	0	0.01118	-0.003501	0.01118	-0.003501	0	0
ENST00000371657	UBE2V1	Q13404	ENSG00000244687	7335	7	118	-31.56	-0.72	108	-31.56	-0.72	0	0	0	0.071645	-0.019163	0.065574	-0.019163	0	0
ENST00000371694	AGPAT2	O15120	ENSG00000169692	10555	1	4	-0.22	-0.11	4	-0.22	-0.11	0	0	0	0.006536	-0.000355	0.006536	-0.000355	0	0
ENST00000371712	INPP5E	Q9NRR6	ENSG00000148384	56623	8	7	-1.06	-0.23	7	-1.06	-0.23	0	0	0	0.00661	-0.001002	0.00661	-0.001002	0	0
ENST00000371730	EPS15	P42566	ENSG00000085832	2060	5	119	-22.73	-0.66	95	-22.73	-0.66	0	0	0	0.04877	-0.009316	0.038934	-0.009316	0	0
ENST00000371764	DDX27	Q96GQ7	ENSG00000124228	55661	5	2	-0.36	-0.2	2	-0.36	-0.2	0	0	0	0.00813	-0.001467	0.00813	-0.001467	0	0
ENST00000371795	IFIT5	Q13325	ENSG00000152778	24138	5	22	-3.45	-0.56	14	-3.45	-0.56	0	0	0	0.009338	-0.001465	0.005942	-0.001465	0	0
ENST00000371796	OLFM1	Q99784	ENSG00000130558	10439	7	20	-2.65	-0.23	15	-2.65	-0.23	0	0	0	0.01992	-0.002636	0.01494	-0.002636	0	0
ENST00000371824	ELAVL4	P26378	ENSG00000162374	1996	6	388	-49.85	-0.67	294	-49.85	-0.67	0	0	0	0.148602	-0.019091	0.112601	-0.019091	0	0
ENST00000371828	STAU1	O95793	ENSG00000124214	6780	9	45	-9.05	-0.53	37	-9.05	-0.53	0	0	0	0.029221	-0.005877	0.024026	-0.005877	0	0
ENST00000371873	CMPK1	P30085	ENSG00000162368	51727	8	80	-25.69	-0.74	74	-25.69	-0.74	0	0	0	0.03815	-0.01225	0.035289	-0.01225	0	0
ENST00000371994	MINPP1	Q9UNW1	ENSG00000107789	9562	4	46	-10.02	-0.49	39	-10.02	-0.49	0	0	0	0.038143	-0.008308	0.032338	-0.008308	0	0
ENST00000372007	PAK3	O75914	ENSG00000077264	5063	8	462	-35.73	-0.73	271	-35.73	-0.73	0	0	0	0.066792	-0.005165	0.039179	-0.005165	0	0
ENST00000372017	SNCG	O76070	ENSG00000173267	6623	4	14	-5.23	-0.78	9	-5.23	-0.78	0	0	0	0.05036	-0.018817	0.032374	-0.018817	0	0
ENST00000372045	CHRDL1	Q9BU40	ENSG00000101938	91851	2	71	-7.71	-0.46	44	-7.71	-0.46	0	0	0	0.029857	-0.003244	0.018503	-0.003244	0	0
ENST00000372146	GTF3C4	Q9UKN8	ENSG00000125484	9329	2	12	-1.52	-0.43	5	-1.52	-0.43	0	0	0	0.001996	-0.000253	0.000832	-0.000253	0	0
ENST00000372168	HECTD3	Q5T447	ENSG00000126107	79654	6	47	-6.36	-0.45	32	-6.36	-0.45	0	0	0	0.049215	-0.006658	0.033508	-0.006658	0	0
ENST00000372187	PRXL2A	Q9BRX8	ENSG00000122378	84293	4	29	-7.44	-0.77	17	-7.44	-0.77	0	0	0	0.032222	-0.008266	0.018889	-0.008266	0	0
ENST00000372189	RAPGEF1	Q13905	ENSG00000107263	2889	9	88	-9.07	-0.5	77	-9.07	-0.5	0	0	0	0.032234	-0.003322	0.028205	-0.003322	0	0
ENST00000372224	KIF2C	Q99661	ENSG00000142945	11004	1	2	-0.16	-0.08	2	-0.16	-0.08	0	0	0	0.003384	-0.000272	0.003384	-0.000272	0	0
ENST00000372231	ANXA11	P50995	ENSG00000122359	311	1	90	-17.33	-0.56	68	-17.33	-0.56	0	0	0	0.01812	-0.003488	0.01369	-0.003488	0	0
ENST00000372247	RNF220	Q5VTB9	ENSG00000187147	55182	7	50	-10.78	-0.7	50	-10.78	-0.7	0	0	0	0.052521	-0.011326	0.052521	-0.011326	0	0
ENST00000372259	ERI3	O43414	ENSG00000117419	79033	7	37	-7.62	-0.5	33	-7.62	-0.5	0	0	0	0.075356	-0.015523	0.06721	-0.015523	0	0
ENST00000372300	AIF1L	Q9BQI0	ENSG00000126878	83543	1	78	-17.53	-0.87	59	-17.53	-0.87	0	0	0	0.026906	-0.006047	0.020352	-0.006047	0	0
ENST00000372371	POLR3A	O14802	ENSG00000148606	11128	5	27	-1.93	-0.35	13	-1.93	-0.35	0	0	0	0.011578	-0.000827	0.005575	-0.000827	0	0
ENST00000372390	TSC22D3	Q99576	ENSG00000157514	1831	7	89	-21.86	-1.13	73	-21.86	-1.13	0	0	0	0.068409	-0.016804	0.056111	-0.016804	0	0
ENST00000372398	NCS1	P62166	ENSG00000107130	23413	9	133	-22.34	-0.57	103	-22.34	-0.57	0	0	0	0.030681	-0.005154	0.02376	-0.005154	0	0
ENST00000372432	HYI	Q5T013	ENSG00000178922	81888	6	4	-1.3	-0.35	4	-1.3	-0.35	0	0	0	0.025806	-0.008368	0.025806	-0.008368	0	0
ENST00000372444	TJAP1	Q5JTD0	ENSG00000137221	93643	1	28	-7.59	-0.49	22	-7.59	-0.49	0	0	0	0.039773	-0.010787	0.03125	-0.010787	0	0
ENST00000372447	C9orf78	Q9NZ63	ENSG00000136819	51759	8	5	-1.35	-0.29	5	-1.35	-0.29	0	0	0	0.005721	-0.001549	0.005721	-0.001549	0	0
ENST00000372522	SVBP	Q8N300	ENSG00000177868	374969	9	4	-1.96	-0.71	3	-1.96	-0.71	0	0	0	0.010959	-0.005359	0.008219	-0.005359	0	0
ENST00000372538	COMTD1	Q86VU5	ENSG00000165644	118881	9	6	-1.4	-0.45	6	-1.4	-0.45	0	0	0	0.056075	-0.013065	0.056075	-0.013065	0	0
ENST00000372556	PPCS	Q9HAB8	ENSG00000127125	79717	7	24	-10.17	-0.98	17	-10.17	-0.98	0	0	0	0.029593	-0.012539	0.020962	-0.012539	0	0
ENST00000372621	CTPS1	P17812	ENSG00000171793	1503	1	22	-4.64	-0.55	20	-4.64	-0.55	0	0	0	0.023913	-0.005048	0.021739	-0.005048	0	0
ENST00000372625	TCEAL1	Q15170	ENSG00000172465	9338	9	21	-4.69	-0.79	14	-4.69	-0.79	0	0	0	0.0375	-0.00837	0.025	-0.00837	0	0
ENST00000372628	TCEAL3	Q969E4	ENSG00000196507	85012	9	10	-3.04	-0.43	9	-3.04	-0.43	0	0	0	0.038023	-0.011551	0.034221	-0.011551	0	0
ENST00000372648	TBC1D13	Q9NVG8	ENSG00000107021	54662	4	50	-6.19	-0.59	40	-6.19	-0.59	0	0	0	0.019562	-0.002423	0.015649	-0.002423	0	0
ENST00000372680	TCEAL5	Q5H9L2	ENSG00000204065	340543	9	8	-3.08	-0.49	8	-3.08	-0.49	0	0	0	0.031373	-0.012086	0.031373	-0.012086	0	0
ENST00000372731	SPTAN1	Q13813	ENSG00000197694	6709	7	10	-2.86	-0.34	10	-2.86	-0.34	0	0	0	0.030211	-0.008637	0.030211	-0.008637	0	0
ENST00000372734	ADK	P55263	ENSG00000156110	132	1	52	-15.95	-1.06	47	-15.95	-1.06	0	0	0	0.060395	-0.01853	0.054588	-0.01853	0	0
ENST00000372755	VCL	P18206	ENSG00000035403	7414	1	197	-21.2	-0.63	139	-21.2	-0.63	0	0	0	0.06162	-0.006632	0.043478	-0.006632	0	0
ENST00000372771	RLF	Q13129	ENSG00000117000	6018	5	42	-14.83	-0.79	42	-14.83	-0.79	0	0	0	0.08805	-0.031086	0.08805	-0.031086	0	0
ENST00000372774	TCEAL6	Q6IPX3	ENSG00000204071	158931	6	1	-0.42	-0.42	1	-0.42	-0.42	0	0	0	0.003257	-0.001368	0.003257	-0.001368	0	0
ENST00000372780	TCEAL2	Q9H3H9	ENSG00000184905	140597	8	1	-0.5	-0.5	1	-0.5	-0.5	0	0	0	0.005	-0.002515	0.005	-0.002515	0	0
ENST00000372813	TOMM34	Q15785	ENSG00000025772	10953	5	29	-7.13	-0.49	22	-7.13	-0.49	0	0	0	0.029532	-0.007257	0.022403	-0.007257	0	0
ENST00000372829	ARMCX1	Q9P291	ENSG00000126947	51309	9	15	-7.82	-0.68	15	-7.82	-0.68	0	0	0	0.036496	-0.019029	0.036496	-0.019029	0	0
ENST00000372874	ADA	P00813	ENSG00000196839	100	3	9	-3.71	-0.64	9	-3.71	-0.64	0	0	0	0.028571	-0.011784	0.028571	-0.011784	0	0
ENST00000372876	TBCC	Q15814	ENSG00000124659	6903	8	1	-0.45	-0.45	1	-0.45	-0.45	0	0	0	0.001802	-0.000818	0.001802	-0.000818	0	0
ENST00000372894	PKIG	Q9Y2B9	ENSG00000168734	11142	7	9	-2.92	-0.42	9	-2.92	-0.42	0	0	0	0.013314	-0.004325	0.013314	-0.004325	0	0
ENST00000372921	ANXA7	P20073	ENSG00000138279	310	2	57	-18.99	-0.75	53	-18.99	-0.75	0	0	0	0.057172	-0.019046	0.053159	-0.019046	0	0
ENST00000372930	TMEM35A	Q53FP2	ENSG00000126950	59353	9	30	-5.77	-1.1	24	-5.77	-1.1	0	0	0	0.021262	-0.004089	0.017009	-0.004089	0	0
ENST00000372950	DNAJC9	Q8WXX5	ENSG00000213551	23234	1	13	-5.25	-0.96	9	-5.25	-0.96	0	0	0	0.022453	-0.009071	0.015544	-0.009071	0	0
ENST00000373001	RRAGC	Q9HB90	ENSG00000116954	64121	6	142	-23.55	-0.71	99	-23.55	-0.71	0	0	0	0.104566	-0.017342	0.072901	-0.017342	0	0
ENST00000373016	FHL3	Q13643	ENSG00000183386	2275	9	26	-6.42	-0.69	22	-6.42	-0.69	0	0	0	0.040752	-0.010061	0.034483	-0.010061	0	0
ENST00000373020	TSPAN6	O43657	ENSG00000000003	7105	2	38	-9.81	-0.77	29	-9.81	-0.77	0	0	0	0.027962	-0.007222	0.021339	-0.007222	0	0
ENST00000373044	YRDC	Q86U90	ENSG00000196449	79693	9	28	-6.81	-0.67	22	-6.81	-0.67	0	0	0	0.028455	-0.006923	0.022358	-0.006923	0	0
ENST00000373069	SLC25A25	Q6KCM7	ENSG00000148339	114789	6	117	-18.53	-0.43	92	-18.53	-0.43	0	0	0	0.064856	-0.010269	0.050998	-0.010269	0	0
ENST00000373097	PCDH11X	Q9BZA7	ENSG00000102290	27328	5	26	-2.42	-0.44	17	-2.42	-0.44	0	0	0	0.006061	-0.000565	0.003963	-0.000565	0	0
ENST00000373154	OARD1	Q9Y530	ENSG00000124596	221443	1	19	-3.39	-0.61	13	-3.39	-0.61	0	0	0	0.029921	-0.005335	0.020472	-0.005335	0	0
ENST00000373176	AK1	P00568	ENSG00000106992	203	9	23	-5.24	-0.72	15	-5.24	-0.72	0	0	0	0.015023	-0.003425	0.009798	-0.003425	0	0
ENST00000373191	AGO3	Q9H9G7	ENSG00000126070	192669	6	1230	-98.28	-0.94	544	-98.28	-0.94	0	0	0	0.073398	-0.005865	0.032462	-0.005865	0	0
ENST00000373202	SGPL1	O95470	ENSG00000166224	8879	3	93	-12.66	-0.6	58	-12.66	-0.6	0	0	0	0.024212	-0.003297	0.0151	-0.003297	0	0
ENST00000373204	AGO1	Q9UL18	ENSG00000092847	26523	3	1004	-67.15	-0.79	545	-67.15	-0.79	0	0	0	0.091908	-0.006147	0.04989	-0.006147	0	0
ENST00000373212	SH3BGRL	O75368	ENSG00000131171	6451	1	23	-8.07	-0.75	18	-8.07	-0.75	0	0	0	0.017385	-0.006104	0.013605	-0.006104	0	0
ENST00000373232	PPA1	Q15181	ENSG00000180817	5464	6	2	-0.64	-0.33	2	-0.64	-0.33	0	0	0	0.006098	-0.001963	0.006098	-0.001963	0	0
ENST00000373242	SAR1A	Q9NR31	ENSG00000079332	56681	5	140	-26.66	-0.78	84	-26.66	-0.78	0	0	0	0.026975	-0.005137	0.016185	-0.005137	0	0
ENST00000373264	CDK9	P50750	ENSG00000136807	1025	5	23	-5.3	-0.48	23	-5.3	-0.48	0	0	0	0.018444	-0.004253	0.018444	-0.004253	0	0
ENST00000373279	FAM241B	Q96D05	ENSG00000171224	219738	9	10	-4.6	-0.61	10	-4.6	-0.61	0	0	0	0.018416	-0.008475	0.018416	-0.008475	0	0
ENST00000373302	STXBP1	P61764	ENSG00000136854	6812	9	73	-15.31	-0.63	63	-15.31	-0.63	0	0	0	0.037226	-0.007807	0.032126	-0.007807	0	0
ENST00000373316	PGK1	P00558	ENSG00000102144	5230	4	78	-10.01	-0.5	51	-10.01	-0.5	0	0	0	0.022485	-0.002885	0.014702	-0.002885	0	0
ENST00000373344	ATRX	P46100	ENSG00000085224	546	8	155	-13.16	-0.35	113	-13.16	-0.35	0	0	0	0.044591	-0.003785	0.032509	-0.003785	0	0
ENST00000373365	GLO1	Q04760	ENSG00000124767	2739	1	7	-1.6	-0.48	6	-1.6	-0.48	0	0	0	0.005098	-0.001165	0.00437	-0.001165	0	0
ENST00000373451	CMTR1	Q8N1G2	ENSG00000137200	23070	5	16	-1.43	-0.24	15	-1.43	-0.24	0	0	0	0.01173	-0.001048	0.010997	-0.001048	0	0
ENST00000373461	VSTM2L	Q96N03	ENSG00000132821	128434	7	21	-7.25	-0.98	14	-7.25	-0.98	0	0	0	0.019091	-0.006592	0.012727	-0.006592	0	0
ENST00000373491	TBC1D22B	Q9NU19	ENSG00000065491	55633	4	120	-18.41	-0.38	97	-18.41	-0.38	0	0	0	0.06663	-0.010224	0.053859	-0.010224	0	0
ENST00000373493	RBBP4	Q09028	ENSG00000162521	5928	3	69	-8.92	-0.85	40	-8.92	-0.85	0	0	0	0.010601	-0.001371	0.006145	-0.001371	0	0
ENST00000373547	PPP6C	O00743	ENSG00000119414	5537	5	443	-87.74	-1.04	311	-87.74	-1.04	0	0	0	0.142765	-0.028275	0.100226	-0.028275	0	0
ENST00000373548	HDAC1	Q13547	ENSG00000116478	3065	1	23	-4.24	-0.5	23	-4.24	-0.5	0	0	0	0.038721	-0.007135	0.038721	-0.007135	0	0
ENST00000373570	RPL35	P42766	ENSG00000136942	11224	3	6	-2.1	-0.49	6	-2.1	-0.49	0	0	0	0.029703	-0.010421	0.029703	-0.010421	0	0
ENST00000373578	SRC	P12931	ENSG00000197122	6714	9	97	-10.2	-0.33	66	-10.2	-0.33	0	0	0	0.036275	-0.003814	0.024682	-0.003814	0	0
ENST00000373585	DDX50	Q9BQ39	ENSG00000107625	79009	1	15	-5.09	-0.43	15	-5.09	-0.43	0	0	0	0.068182	-0.023159	0.068182	-0.023159	0	0
ENST00000373610	TXLNA	P40222	ENSG00000084652	200081	1	115	-17.41	-0.54	95	-17.41	-0.54	0	0	0	0.037181	-0.005628	0.030715	-0.005628	0	0
ENST00000373615	LHX2	P50458	ENSG00000106689	9355	1	66	-17.03	-0.48	58	-17.03	-0.48	0	0	0	0.110553	-0.028523	0.097152	-0.028523	0	0
ENST00000373616	MTCH1	Q9NZJ7	ENSG00000137409	23787	9	5	-1.7	-0.4	5	-1.7	-0.4	0	0	0	0.006536	-0.00222	0.006536	-0.00222	0	0
ENST00000373631	CRB2	Q5IJ48	ENSG00000148204	286204	1	22	-4.63	-0.65	14	-4.63	-0.65	0	0	0	0.012987	-0.002733	0.008264	-0.002733	0	0
ENST00000373647	RABGAP1	Q9Y3P9	ENSG00000011454	23637	7	43	-10.4	-0.47	39	-10.4	-0.47	0	0	0	0.025966	-0.006281	0.023551	-0.006281	0	0
ENST00000373699	PPIL1	Q9Y3C6	ENSG00000137168	51645	7	27	-9.08	-0.56	27	-9.08	-0.56	0	0	0	0.0273	-0.009182	0.0273	-0.009182	0	0
ENST00000373713	FABP3	P05413	ENSG00000121769	2170	7	22	-8.99	-0.76	21	-8.99	-0.76	0	0	0	0.083333	-0.034034	0.079545	-0.034034	0	0
ENST00000373715	SRSF3	P84103	ENSG00000112081	6428	3	57	-19.19	-1.59	39	-19.19	-1.59	0	0	0	0.015772	-0.005311	0.010791	-0.005311	0	0
ENST00000373719	OGT	O15294	ENSG00000147162	8473	6	131	-22.66	-0.52	116	-22.66	-0.52	0	0	0	0.062203	-0.01076	0.055081	-0.01076	0	0
ENST00000373790	TAF1	P21675	ENSG00000147133	6872	5	51	-5.84	-0.43	38	-5.84	-0.43	0	0	0	0.025994	-0.002979	0.019368	-0.002979	0	0
ENST00000373795	SRSF4	Q08170	ENSG00000116350	6429	3	22	-7.31	-0.43	22	-7.31	-0.43	0	0	0	0.032836	-0.010907	0.032836	-0.010907	0	0
ENST00000373798	EPB41	P11171	ENSG00000159023	2035	4	99	-12.43	-0.53	84	-12.43	-0.53	0	0	0	0.030584	-0.003841	0.02595	-0.003841	0	0
ENST00000373816	GMEB1	Q9Y692	ENSG00000162419	10691	5	220	-23.07	-0.59	159	-23.07	-0.59	0	0	0	0.048003	-0.005033	0.034693	-0.005033	0	0
ENST00000373823	GSN	P06396	ENSG00000148180	2934	1	6	-2.22	-0.46	6	-2.22	-0.46	0	0	0	0.024691	-0.009123	0.024691	-0.009123	0	0
ENST00000373825	SRPK1	Q96SB4	ENSG00000096063	6732	4	96	-14.62	-0.54	72	-14.62	-0.54	0	0	0	0.041008	-0.006243	0.030756	-0.006243	0	0
ENST00000373833	RCC1	P18754	ENSG00000180198	1104	1	21	-3.97	-0.49	17	-3.97	-0.49	0	0	0	0.016204	-0.003063	0.013117	-0.003063	0	0
ENST00000373839	PHACTR4	Q8IZ21	ENSG00000204138	65979	5	200	-28.84	-0.56	154	-28.84	-0.56	0	0	0	0.052315	-0.007545	0.040283	-0.007545	0	0
ENST00000373840	RAB14	P61106	ENSG00000119396	51552	8	170	-38.3	-0.95	136	-38.3	-0.95	0	0	0	0.052115	-0.01174	0.041692	-0.01174	0	0
ENST00000373874	TGIF2	Q9GZN2	ENSG00000118707	60436	1	192	-32.9	-0.85	151	-32.9	-0.85	0	0	0	0.07613	-0.013045	0.059873	-0.013045	0	0
ENST00000373880	PHYHIPL	Q96FC7	ENSG00000165443	84457	4	87	-22.75	-0.53	76	-22.75	-0.53	0	0	0	0.039799	-0.010408	0.034767	-0.010408	0	0
ENST00000373910	UBE2D1	P51668	ENSG00000072401	7321	8	183	-44.97	-1.01	124	-44.97	-1.01	0	0	0	0.091914	-0.022586	0.06228	-0.022586	0	0
ENST00000373912	RPA2	P15927	ENSG00000117748	6118	1	12	-4	-0.42	12	-4	-0.42	0	0	0	0.018692	-0.006235	0.018692	-0.006235	0	0
ENST00000373913	DLGAP4	Q9Y2H0	ENSG00000080845	22839	9	124	-16.02	-0.49	106	-16.02	-0.49	0	0	0	0.077067	-0.009958	0.065879	-0.009958	0	0
ENST00000373930	MEGF9	Q9H1U4	ENSG00000106780	1955	9	238	-27.12	-0.58	154	-27.12	-0.58	0	0	0	0.054338	-0.006192	0.03516	-0.006192	0	0
ENST00000373943	STX12	Q86Y82	ENSG00000117758	23673	9	63	-16.96	-0.73	53	-16.96	-0.73	0	0	0	0.029633	-0.007976	0.024929	-0.007976	0	0
ENST00000373983	TRIM32	Q13049	ENSG00000119401	22954	9	25	-2.71	-0.4	19	-2.71	-0.4	0	0	0	0.015635	-0.001696	0.011882	-0.001696	0	0
ENST00000374050	ATP6V1G1	O75348	ENSG00000136888	9550	7	41	-13.21	-0.74	38	-13.21	-0.74	0	0	0	0.064771	-0.020866	0.060032	-0.020866	0	0
ENST00000374092	NFS1	Q9Y697	ENSG00000244005	9054	7	8	-2.08	-0.58	8	-2.08	-0.58	0	0	0	0.005096	-0.001326	0.005096	-0.001326	0	0
ENST00000374168	RPS6KA1	Q15418	ENSG00000117676	6195	4	42	-10.35	-0.4	42	-10.35	-0.4	0	0	0	0.050786	-0.012515	0.050786	-0.012515	0	0
ENST00000374169	POLE3	Q9NRF9	ENSG00000148229	54107	4	34	-7.8	-0.7	28	-7.8	-0.7	0	0	0	0.021533	-0.004942	0.017733	-0.004942	0	0
ENST00000374182	MAPK8	P45983	ENSG00000107643	5599	8	241	-49.1	-0.89	158	-49.1	-0.89	0	0	0	0.053939	-0.01099	0.035363	-0.01099	0	0
ENST00000374227	ZFP37	Q9Y6Q3	ENSG00000136866	7539	8	27	-1.99	-0.33	18	-1.99	-0.33	0	0	0	0.00621	-0.000457	0.00414	-0.000457	0	0
ENST00000374232	SNX30	Q5VWJ9	ENSG00000148158	401548	8	419	-52.45	-0.77	250	-52.45	-0.77	0	0	0	0.068163	-0.008533	0.04067	-0.008533	0	0
ENST00000374257	PTBP3	O95758	ENSG00000119314	9991	8	262	-38.54	-0.78	184	-38.54	-0.78	0	0	0	0.048348	-0.007112	0.033955	-0.007112	0	0
ENST00000374274	SNX12	Q9UMY4	ENSG00000147164	29934	9	120	-35.4	-0.74	106	-35.4	-0.74	0	0	0	0.067682	-0.019964	0.059786	-0.019964	0	0
ENST00000374293	GNG10	P50151	ENSG00000242616	2790	3	18	-7.61	-0.92	17	-7.61	-0.92	0	0	0	0.018237	-0.007709	0.017224	-0.007709	0	0
ENST00000374379	CLIC4	Q9Y696	ENSG00000169504	25932	2	105	-27.76	-0.88	73	-27.76	-0.88	0	0	0	0.030973	-0.008189	0.021534	-0.008189	0	0
ENST00000374403	KIF4A	O95239	ENSG00000090889	24137	1	13	-1.35	-0.2	13	-1.35	-0.2	0	0	0	0.022807	-0.002375	0.022807	-0.002375	0	0
ENST00000374466	CSGALNACT2	Q8N6G5	ENSG00000169826	55454	8	41	-8.91	-0.42	34	-8.91	-0.42	0	0	0	0.023177	-0.005035	0.01922	-0.005035	0	0
ENST00000374479	FUCA1	P04066	ENSG00000179163	2517	9	13	-3.46	-0.41	13	-3.46	-0.41	0	0	0	0.020281	-0.005404	0.020281	-0.005404	0	0
ENST00000374512	PHF1	O43189	ENSG00000112511	5252	8	39	-6	-0.32	39	-6	-0.32	0	0	0	0.06701	-0.010308	0.06701	-0.010308	0	0
ENST00000374514	LYPLA2	O95372	ENSG00000011009	11313	7	21	-4.85	-1.37	14	-4.85	-1.37	0	0	0	0.025926	-0.005993	0.017284	-0.005993	0	0
ENST00000374518	BMS1	Q14692	ENSG00000165733	9790	5	4	-0.8	-0.33	4	-0.8	-0.33	0	0	0	0.001041	-0.000208	0.001041	-0.000208	0	0
ENST00000374550	RPL11	P62913	ENSG00000142676	6135	3	6	-1.38	-0.36	6	-1.38	-0.36	0	0	0	0.12766	-0.029404	0.12766	-0.029404	0	0
ENST00000374574	BMPR2	Q13873	ENSG00000204217	659	8	642	-67.69	-0.89	347	-67.69	-0.89	0	0	0	0.079732	-0.008406	0.043095	-0.008406	0	0
ENST00000374583	PJA1	Q8NG27	ENSG00000181191	64219	8	4	-1.15	-0.37	4	-1.15	-0.37	0	0	0	0.008772	-0.00252	0.008772	-0.00252	0	0
ENST00000374632	EPHB2	P29323	ENSG00000133216	2048	2	115	-15.48	-0.62	90	-15.48	-0.62	0	0	0	0.163585	-0.022016	0.128023	-0.022016	0	0
ENST00000374647	ELP1	O95163	ENSG00000070061	8518	5	33	-8.31	-0.79	27	-8.31	-0.79	0	0	0	0.020612	-0.005191	0.016864	-0.005191	0	0
ENST00000374710	FSD1L	Q9BXM9	ENSG00000106701	83856	9	182	-20.04	-0.55	104	-20.04	-0.55	0	0	0	0.030573	-0.003367	0.01747	-0.003367	0	0
ENST00000374746	CUL2	Q13617	ENSG00000108094	8453	9	65	-16.26	-0.66	56	-16.26	-0.66	0	0	0	0.036869	-0.009224	0.031764	-0.009224	0	0
ENST00000374767	NIPSNAP3A	Q9UFN0	ENSG00000136783	25934	9	3	-1.21	-0.4	3	-1.21	-0.4	0	0	0	0.003812	-0.001531	0.003812	-0.001531	0	0
ENST00000374791	NTM	Q9P121	ENSG00000182667	50863	8	17	-4	-0.31	17	-4	-0.31	0	0	0	0.010125	-0.002384	0.010125	-0.002384	0	0
ENST00000374793	SMC2	O95347	ENSG00000136824	10592	1	60	-6.67	-0.61	29	-6.67	-0.61	0	0	0	0.028504	-0.003167	0.013777	-0.003167	0	0
ENST00000374796	NCOA6	Q14686	ENSG00000198646	23054	5	30	-6.39	-0.61	27	-6.39	-0.61	0	0	0	0.054446	-0.011595	0.049002	-0.011595	0	0
ENST00000374837	MAP1LC3A	Q9H492	ENSG00000101460	84557	9	5	-1.71	-0.44	5	-1.71	-0.44	0	0	0	0.011111	-0.0038	0.011111	-0.0038	0	0
ENST00000374861	ZNF189	O75820	ENSG00000136870	7743	2	72	-7.81	-0.72	53	-7.81	-0.72	0	0	0	0.071006	-0.007701	0.052268	-0.007701	0	0
ENST00000374910	SPIN2B	Q9BPZ2	ENSG00000186787	474343	7	1	-0.68	-0.68	1	-0.68	-0.68	0	0	0	0.005747	-0.003891	0.005747	-0.003891	0	0
ENST00000374941	RRAGB	Q5VZM2	ENSG00000083750	10325	8	14	-5.87	-0.8	11	-5.87	-0.8	0	0	0	0.032258	-0.013525	0.025346	-0.013525	0	0
ENST00000375060	MAGED2	Q9UNF1	ENSG00000102316	10916	1	2	-0.4	-0.23	2	-0.4	-0.23	0	0	0	0.013986	-0.002811	0.013986	-0.002811	0	0
ENST00000375169	WNK3	Q9BYP7	ENSG00000196632	65267	7	402	-25.92	-0.48	251	-25.92	-0.48	0	0	0	0.073038	-0.004709	0.045603	-0.004709	0	0
ENST00000375251	HABP4	Q5JVS0	ENSG00000130956	22927	8	44	-14.49	-0.76	37	-14.49	-0.76	0	0	0	0.03382	-0.011135	0.02844	-0.011135	0	0
ENST00000375279	CBFA2T2	O43439	ENSG00000078699	9139	2	231	-18.36	-0.69	141	-18.36	-0.69	0	0	0	0.042833	-0.003404	0.026145	-0.003404	0	0
ENST00000375331	STK19	P49842	ENSG00000204344	8859	8	19	-7.07	-0.7	14	-7.07	-0.7	0	0	0	0.046914	-0.017454	0.034568	-0.017454	0	0
ENST00000375341	ALDH4A1	P30038	ENSG00000159423	8659	3	36	-7.84	-0.78	22	-7.84	-0.78	0	0	0	0.025424	-0.005539	0.015537	-0.005539	0	0
ENST00000375376	PHF2	O75151	ENSG00000197724	5253	8	56	-9.07	-0.48	47	-9.07	-0.48	0	0	0	0.029258	-0.00474	0.024556	-0.00474	0	0
ENST00000375400	SVIL	O95425	ENSG00000197321	6840	1	29	-5.77	-0.34	29	-5.77	-0.34	0	0	0	0.031798	-0.006321	0.031798	-0.006321	0	0
ENST00000375436	RCC2	Q9P258	ENSG00000179051	55920	1	117	-21.95	-0.44	105	-21.95	-0.44	0	0	0	0.05015	-0.009407	0.045006	-0.009407	0	0
ENST00000375445	BUD13	Q9BRD0	ENSG00000137656	84811	3	3	-1.32	-0.44	3	-1.32	-0.44	0	0	0	0.009524	-0.004197	0.009524	-0.004197	0	0
ENST00000375571	MAPRE1	Q15691	ENSG00000101367	22919	9	128	-29.12	-0.66	108	-29.12	-0.66	0	0	0	0.07619	-0.01733	0.064286	-0.01733	0	0
ENST00000375626	MAGED4	Q96JG8	ENSG00000154545	728239	7	3	-1.63	-0.56	3	-1.63	-0.56	0	0	0	0.013453	-0.007318	0.013453	-0.007318	0	0
ENST00000375712	KIF3B	O15066	ENSG00000101350	9371	9	165	-22.75	-0.66	117	-22.75	-0.66	0	0	0	0.044655	-0.006158	0.031664	-0.006158	0	0
ENST00000375731	AUH	Q13825	ENSG00000148090	549	8	22	-8.92	-1.06	22	-8.92	-1.06	0	0	0	0.041045	-0.016636	0.041045	-0.016636	0	0
ENST00000375743	ZBTB17	Q13105	ENSG00000116809	7709	5	10	-2.23	-0.33	10	-2.23	-0.33	0	0	0	0.097087	-0.02165	0.097087	-0.02165	0	0
ENST00000375765	DIRAS2	Q96HU8	ENSG00000165023	54769	7	132	-20.18	-0.98	78	-20.18	-0.98	0	0	0	0.038835	-0.005938	0.022948	-0.005938	0	0
ENST00000375784	CLIC1	O00299	ENSG00000213719	1192	1	3	-1.57	-0.53	3	-1.57	-0.53	0	0	0	0.011364	-0.005936	0.011364	-0.005936	0	0
ENST00000375835	SHC3	Q92529	ENSG00000148082	53358	6	215	-15.72	-0.82	134	-15.72	-0.82	0	0	0	0.027998	-0.002047	0.01745	-0.002047	0	0
ENST00000375859	SPIN1	Q9Y657	ENSG00000106723	10927	8	175	-26.91	-1.21	113	-26.91	-1.21	0	0	0	0.05117	-0.007868	0.033041	-0.007868	0	0
ENST00000375980	EFHD2	Q96C19	ENSG00000142634	79180	1	50	-12.48	-0.53	47	-12.48	-0.53	0	0	0	0.030826	-0.007695	0.028977	-0.007695	0	0
ENST00000375991	ISCA1	Q9BUE6	ENSG00000135070	81689	9	12	-5.77	-0.66	12	-5.77	-0.66	0	0	0	0.008	-0.003848	0.008	-0.003848	0	0
ENST00000375992	NUDT11	Q96G61	ENSG00000196368	55190	7	47	-11.06	-0.92	32	-11.06	-0.92	0	0	0	0.026996	-0.00635	0.01838	-0.00635	0	0
ENST00000376007	PRRC2A	P48634	ENSG00000204469	7916	5	14	-0.5	-0.07	14	-0.5	-0.07	0	0	0	0.074468	-0.002676	0.074468	-0.002676	0	0
ENST00000376027	TEX30	Q5JUR7	ENSG00000151287	93081	1	13	-4.25	-0.55	13	-4.25	-0.55	0	0	0	0.023636	-0.007731	0.023636	-0.007731	0	0
ENST00000376052	TPP2	P29144	ENSG00000134900	7174	2	25	-4.79	-0.36	23	-4.79	-0.36	0	0	0	0.015198	-0.002911	0.013982	-0.002911	0	0
ENST00000376062	BCL2L1	Q07817	ENSG00000171552	598	9	72	-14.05	-0.75	60	-14.05	-0.75	0	0	0	0.048	-0.009363	0.04	-0.009363	0	0
ENST00000376113	BIN1	O00499	ENSG00000136717	274	7	14	-6.51	-0.67	14	-6.51	-0.67	0	0	0	0.027888	-0.01297	0.027888	-0.01297	0	0
ENST00000376151	ATP6V1G2	O95670	ENSG00000213760	534	9	7	-2.88	-1	6	-2.88	-1	0	0	0	0.007376	-0.003038	0.006322	-0.003038	0	0
ENST00000376170	ABI1	Q8IZP0	ENSG00000136754	10006	2	40	-6.69	-0.37	34	-6.69	-0.37	0	0	0	0.020202	-0.003381	0.017172	-0.003381	0	0
ENST00000376234	TMTC4	Q5T4D3	ENSG00000125247	84899	1	54	-14.61	-0.77	47	-14.61	-0.77	0	0	0	0.050467	-0.013657	0.043925	-0.013657	0	0
ENST00000376286	PCCA	P05165	ENSG00000175198	5095	4	2	-0.71	-0.35	2	-0.71	-0.35	0	0	0	0.007435	-0.002636	0.007435	-0.002636	0	0
ENST00000376300	CCDC93	Q567U6	ENSG00000125633	54520	5	71	-6.32	-0.39	44	-6.32	-0.39	0	0	0	0.014585	-0.001299	0.009039	-0.001299	0	0
ENST00000376355	CLYBL	Q8N0X4	ENSG00000125246	171425	4	124	-14.13	-0.75	97	-14.13	-0.75	0	0	0	0.021663	-0.002469	0.016946	-0.002469	0	0
ENST00000376371	GKAP1	Q5VSY0	ENSG00000165113	80318	1	14	-4.29	-0.34	14	-4.29	-0.34	0	0	0	0.050179	-0.015387	0.050179	-0.015387	0	0
ENST00000376378	PRTFDC1	Q9NRG1	ENSG00000099256	56952	1	6	-1.25	-0.23	6	-1.25	-0.23	0	0	0	0.035714	-0.007411	0.035714	-0.007411	0	0
ENST00000376389	FLOT1	O75955	ENSG00000137312	10211	6	33	-11.72	-0.84	26	-11.72	-0.84	0	0	0	0.080488	-0.02858	0.063415	-0.02858	0	0
ENST00000376406	MDC1	Q14676	ENSG00000137337	9656	1	8	-4.17	-0.67	8	-4.17	-0.67	0	0	0	0.012103	-0.006304	0.012103	-0.006304	0	0
ENST00000376440	UBAC2	Q8NBM4	ENSG00000134882	337867	1	2	-0.13	-0.07	2	-0.13	-0.07	0	0	0	0.001826	-0.000118	0.001826	-0.000118	0	0
ENST00000376485	ATAT1	Q5SQI0	ENSG00000137343	79969	9	3	-1.77	-0.63	3	-1.77	-0.63	0	0	0	0.016393	-0.009661	0.016393	-0.009661	0	0
ENST00000376560	PRR3	P79522	ENSG00000204576	80742	8	116	-24.04	-0.81	93	-24.04	-0.81	0	0	0	0.094232	-0.019532	0.075548	-0.019532	0	0
ENST00000376573	PIP4K2A	P48426	ENSG00000150867	5305	6	92	-19.57	-0.85	72	-19.57	-0.85	0	0	0	0.039066	-0.00831	0.030573	-0.00831	0	0
ENST00000376588	PSAT1	Q9Y617	ENSG00000135069	29968	1	17	-5.85	-0.89	12	-5.85	-0.89	0	0	0	0.016832	-0.005792	0.011881	-0.005792	0	0
ENST00000376663	BMI1	P35226	ENSG00000168283	648	8	145	-28.39	-0.91	115	-28.39	-0.91	0	0	0	0.07455	-0.014599	0.059126	-0.014599	0	0
ENST00000376736	RFK	Q969G6	ENSG00000135002	55312	8	9	-2.33	-0.87	4	-2.33	-0.87	0	0	0	0.004775	-0.001235	0.002122	-0.001235	0	0
ENST00000376741	SP2	Q02086	ENSG00000167182	6668	2	179	-22.95	-0.68	118	-22.95	-0.68	0	0	0	0.15757	-0.020204	0.103873	-0.020204	0	0
ENST00000376874	RILPL1	Q5EBL4	ENSG00000188026	353116	2	50	-10.77	-0.6	40	-10.77	-0.6	0	0	0	0.020105	-0.004329	0.016084	-0.004329	0	0
ENST00000376945	SOX21	Q9Y651	ENSG00000125285	11166	1	45	-7.18	-0.86	40	-7.18	-0.86	0	0	0	0.028125	-0.004489	0.025	-0.004489	0	0
ENST00000376957	SRM	P19623	ENSG00000116649	6723	9	42	-7.14	-1.04	29	-7.14	-1.04	0	0	0	0.150538	-0.025599	0.103943	-0.025599	0	0
ENST00000376977	GABBR1	Q9UBS5	ENSG00000204681	2550	9	72	-11.46	-0.69	51	-11.46	-0.69	0	0	0	24	-3.81967	17	-3.81967	0	0
ENST00000377026	NAPB	Q9H115	ENSG00000125814	63908	9	43	-10.63	-0.72	36	-10.63	-0.72	0	0	0	0.015051	-0.003721	0.012601	-0.003721	0	0
ENST00000377086	KIF1B	O60333	ENSG00000054523	23095	5	228	-17.02	-0.55	151	-17.02	-0.55	0	0	0	0.045427	-0.003391	0.030086	-0.003391	0	0
ENST00000377184	MPP2	Q14168	ENSG00000108852	4355	7	89	-12.03	-1.04	61	-12.03	-1.04	0	0	0	0.036282	-0.004905	0.024868	-0.004905	0	0
ENST00000377223	LZIC	Q8WZA0	ENSG00000162441	84328	9	154	-33.27	-1.29	115	-33.27	-1.29	0	0	0	0.105263	-0.022743	0.078606	-0.022743	0	0
ENST00000377244	SNX15	Q9NRS6	ENSG00000110025	29907	8	24	-8.78	-0.82	22	-8.78	-0.82	0	0	0	0.030651	-0.011218	0.028097	-0.011218	0	0
ENST00000377307	ARHGAP39	Q9C0H5	ENSG00000147799	80728	9	30	-4.03	-0.39	29	-4.03	-0.39	0	0	0	0.024077	-0.003237	0.023274	-0.003237	0	0
ENST00000377386	TGOLN2	O43493	ENSG00000152291	10618	8	135	-18.71	-0.81	79	-18.71	-0.81	0	0	0	0.028632	-0.003967	0.016755	-0.003967	0	0
ENST00000377390	SF1	Q15637	ENSG00000168066	7536	2	143	-24.31	-0.91	109	-24.31	-0.91	0	0	0	0.117695	-0.02001	0.089712	-0.02001	0	0
ENST00000377403	H6PD	O95479	ENSG00000049239	9563	1	85	-7.6	-0.61	30	-7.6	-0.61	0	0	0	0.013136	-0.001174	0.004636	-0.001174	0	0
ENST00000377474	KCTD12	Q96CX2	ENSG00000178695	115207	7	155	-19.81	-0.53	99	-19.81	-0.53	0	0	0	0.03095	-0.003956	0.019768	-0.003956	0	0
ENST00000377524	STAM	Q92783	ENSG00000136738	8027	9	96	-26.8	-0.74	80	-26.8	-0.74	0	0	0	0.084433	-0.023574	0.070361	-0.023574	0	0
ENST00000377560	HECTD4	Q9Y4D8	ENSG00000173064	283450	8	63	-6.43	-0.39	52	-6.43	-0.39	0	0	0	0.028636	-0.002924	0.023636	-0.002924	0	0
ENST00000377595	UCHL3	P15374	ENSG00000118939	7347	7	73	-16.16	-1.35	42	-16.16	-1.35	0	0	0	0.58871	-0.130306	0.33871	-0.130306	0	0
ENST00000377669	KLF12	Q9Y4X4	ENSG00000118922	11278	4	833	-68.17	-0.88	456	-68.17	-0.88	0	0	0	0.088579	-0.007249	0.04849	-0.007249	0	0
ENST00000377694	IGFBPL1	Q8WX77	ENSG00000137142	347252	7	42	-6.59	-0.68	24	-6.59	-0.68	0	0	0	0.177966	-0.027928	0.101695	-0.027928	0	0
ENST00000377698	ALDH1B1	P30837	ENSG00000137124	219	3	5	-1.06	-0.43	5	-1.06	-0.43	0	0	0	0.003671	-0.000777	0.003671	-0.000777	0	0
ENST00000377707	SHB	Q15464	ENSG00000107338	6461	9	113	-15.16	-0.93	81	-15.16	-0.93	0	0	0	0.163768	-0.02197	0.117391	-0.02197	0	0
ENST00000377759	SNX5	Q9Y5X3	ENSG00000089006	27131	1	34	-11.98	-0.66	28	-11.98	-0.66	0	0	0	0.044561	-0.015699	0.036697	-0.015699	0	0
ENST00000377767	DIS3	Q9Y2L1	ENSG00000083520	22894	8	69	-8.08	-0.62	34	-8.08	-0.62	0	0	0	0.009044	-0.001059	0.004457	-0.001059	0	0
ENST00000377808	SMARCE1	Q969G3	ENSG00000073584	6605	1	135	-22.48	-1.07	96	-22.48	-1.07	0	0	0	0.108086	-0.018002	0.076861	-0.018002	0	0
ENST00000377811	NDUFB11	Q9NX14	ENSG00000147123	54539	7	2	-0.68	-0.35	2	-0.68	-0.35	0	0	0	0.019231	-0.006567	0.019231	-0.006567	0	0
ENST00000377813	RRBP1	Q9P2E9	ENSG00000125844	6238	1	40	-11.94	-0.45	40	-11.94	-0.45	0	0	0	0.078895	-0.023542	0.078895	-0.023542	0	0
[truncated: 940 more rows]

## Sheet: Transcript.feature.length
transcript_id	gene_symbol	UniProt	ENSG_id	gene_id.x	module	tx_id	gene_id.y	nexon	tx_len	cds_len	utr5_len	utr3_len
ENST00000001008	FKBP4	Q02790	ENSG00000004478	2288	7	152170	ENSG00000004478	10	3715	1380	170	2165
ENST00000002165	FUCA2	Q9BTY2	ENSG00000001036	2519	1	102313	ENSG00000001036	7	2385	1404	86	895
ENST00000003100	CYP51A1	Q16850	ENSG00000001630	1595	4	111361	ENSG00000001630	10	3155	1530	113	1512
ENST00000005259	BCAP29	Q9UHQ4	ENSG00000075790	55973	7	106842	ENSG00000075790	8	4572	726	339	3507
ENST00000005286	TMEM132A	Q24JP5	ENSG00000006118	54972	9	141426	ENSG00000006118	11	3480	3075	153	252
ENST00000005340	DVL2	O14641	ENSG00000004975	1856	1	203720	ENSG00000004975	15	2989	2211	255	523
ENST00000005374	GGCT	O75223	ENSG00000006625	79017	1	109692	ENSG00000006625	3	1032	345	132	555
ENST00000005386	RPAP3	Q9H6T3	ENSG00000005175	79657	1	160374	ENSG00000005175	17	4339	1998	85	2256
ENST00000006777	RHBDD2	Q6NTF9	ENSG00000005486	57414	7	105498	ENSG00000005486	4	1721	1095	49	577
ENST00000007516	NDUFAB1	O14561	ENSG00000004779	4706	7	193407	ENSG00000004779	5	665	471	26	168
ENST00000007699	YBX2	Q9Y2T7	ENSG00000006047	51087	9	203780	ENSG00000006047	9	1654	1095	139	420
ENST00000009180	CD9	P21926	ENSG00000010278	928	2	152368	ENSG00000010278	8	1225	687	100	438
ENST00000011473	SYPL1	Q16563	ENSG00000008282	6856	1	112296	ENSG00000008282	6	2127	780	47	1300
ENST00000011619	RANBP9	Q96S59	ENSG00000010017	10048	5	98331	ENSG00000010017	14	3384	2190	330	864
ENST00000012134	HIVEP2	P31629	ENSG00000010818	3097	9	102292	ENSG00000010818	9	9755	7341	776	1638
ENST00000013034	NME1	P15531	ENSG00000239672	4830	7	200740	ENSG00000239672	6	796	534	209	53
ENST00000013070	UBR7	Q8N806	ENSG00000012963	55148	1	172206	ENSG00000012963	11	3494	1278	36	2180
ENST00000013125	MAP4K5	Q9Y4K4	ENSG00000012983	11183	9	174844	ENSG00000012983	32	4354	2541	319	1494
ENST00000014930	HEBP1	Q9NRV9	ENSG00000013583	50865	1	159463	ENSG00000013583	4	1159	570	151	438
ENST00000019317	RALBP1	Q15311	ENSG00000017797	10928	2	210354	ENSG00000017797	10	4368	1968	223	2177
ENST00000022615	VDAC3	Q9Y277	ENSG00000078668	7419	9	115613	ENSG00000078668	10	1418	852	91	475
ENST00000025008	RB1CC1	Q8TDY2	ENSG00000023287	9821	5	120119	ENSG00000023287	24	6636	4785	527	1324
ENST00000025399	STRAP	Q9Y3F4	ENSG00000023734	11171	7	153160	ENSG00000023734	11	1442	1092	314	36
ENST00000037243	GABARAPL2	P60520	ENSG00000034713	11345	7	190583	ENSG00000034713	4	974	354	108	512
ENST00000040738	BOD1L1	Q8NFC6	ENSG00000038219	259282	6	77882	ENSG00000038219	26	10567	9156	138	1273
ENST00000042381	RIPOR1	Q6ZS17	ENSG00000039523	79567	9	189895	ENSG00000039523	22	4092	3660	109	323
ENST00000052569	GOPC	Q9HD26	ENSG00000047932	57120	8	101577	ENSG00000047932	8	4590	1365	240	2985
ENST00000054950	RCN1	Q15293	ENSG00000049449	5954	1	140189	ENSG00000049449	6	2572	996	293	1283
ENST00000055077	RFC2	P35250	ENSG00000049541	5982	1	110919	ENSG00000049541	11	1685	1065	16	604
ENST00000055335	PPP1R3F	Q6ZSY5	ENSG00000049769	89801	8	242457	ENSG00000049769	4	3477	2400	77	1000
ENST00000074304	INPP4A	Q96PE3	ENSG00000040933	3631	9	45004	ENSG00000040933	26	6752	2934	393	3425
ENST00000081029	MRPS35	P82673	ENSG00000061794	60488	9	153538	ENSG00000061794	8	1829	972	12	845
ENST00000085079	EPN1	Q9Y6I3	ENSG00000063245	29924	9	220893	ENSG00000063245	10	2355	1653	292	410
ENST00000158166	CAMKK1	Q8N5S9	ENSG00000004660	84254	9	203347	ENSG00000004660	16	2459	1563	149	747
ENST00000159087	ANO8	Q9HCE9	ENSG00000074855	57719	9	223723	ENSG00000074855	18	4178	3699	185	294
ENST00000160298	CAMSAP3	Q9P1Y5	ENSG00000076826	57662	9	215371	ENSG00000076826	17	3889	3750	101	38
ENST00000160373	CTTNBP2	Q8WZ74	ENSG00000077063	83992	9	112612	ENSG00000077063	23	5904	4992	26	886
ENST00000160382	ACTL6B	O94805	ENSG00000077080	51412	9	111983	ENSG00000077080	14	1524	1281	94	149
ENST00000160827	KIF22	Q14807	ENSG00000079616	3835	1	187970	ENSG00000079616	14	2113	1998	40	75
ENST00000161863	YTHDC2	Q9H6S0	ENSG00000047188	64848	5	84787	ENSG00000047188	30	6305	4293	202	1810
ENST00000162391	FOXJ2	Q9P0K8	ENSG00000065970	55810	8	152707	ENSG00000065970	11	5524	1725	1132	2667
ENST00000163416	GOLGA5	Q8TBA6	ENSG00000066455	9950	6	172183	ENSG00000066455	13	2879	2196	182	501
ENST00000164024	CELSR3	Q9NYQ7	ENSG00000008300	1951	9	67271	ENSG00000008300	35	11933	9939	252	1742
ENST00000164133	PPP2R5B	Q15173	ENSG00000068971	5526	9	141935	ENSG00000068971	14	2729	1494	604	631
ENST00000165698	REEP1	Q9H902	ENSG00000068615	65055	9	53525	ENSG00000068615	7	3857	606	144	3107
ENST00000166345	TRIP13	Q15645	ENSG00000071539	9319	1	81994	ENSG00000071539	13	2431	1299	115	1017
ENST00000166534	P4HA2	O15460	ENSG00000072682	8974	2	90548	ENSG00000072682	16	2230	1608	222	400
ENST00000167218	PDCD2	Q16342	ENSG00000071994	5134	9	103105	ENSG00000071994	5	1118	666	64	388
ENST00000171111	KEAP1	Q14145	ENSG00000079999	9817	2	222756	ENSG00000079999	6	2565	1875	163	527
ENST00000174653	AP3M2	P53677	ENSG00000070718	10947	9	115543	ENSG00000070718	9	3661	1257	282	2122
ENST00000176643	ALDH3A2	P51648	ENSG00000072210	224	6	198167	ENSG00000072210	10	3703	1458	221	2024
ENST00000181796	FAM107B	Q9H098	ENSG00000065809	83641	9	135323	ENSG00000065809	5	3785	921	234	2630
ENST00000185150	ERLEC1	Q96DZ1	ENSG00000068912	27248	7	43427	ENSG00000068912	14	2446	1452	167	827
ENST00000187397	ARPP21	Q9UBL0	ENSG00000172995	10777	9	59583	ENSG00000172995	20	3433	2439	456	538
ENST00000188312	ACTR6	Q9GZN1	ENSG00000075089	64431	5	156651	ENSG00000075089	11	2464	1191	765	508
ENST00000188376	SLC25A3	Q00325	ENSG00000075415	5250	3	156612	ENSG00000075415	7	1909	1086	354	469
ENST00000189444	NFKB2	Q00653	ENSG00000077150	4791	1	133861	ENSG00000077150	23	3012	2700	164	148
ENST00000190611	OSBPL6	Q9BZF3	ENSG00000079156	114880	6	47466	ENSG00000079156	25	10652	2805	513	7334
ENST00000192788	UHRF1BP1	Q6BDS2	ENSG00000065060	54887	2	94644	ENSG00000065060	21	9567	4323	168	5076
ENST00000193403	ACTN1	P12814	ENSG00000072110	87	1	175479	ENSG00000072110	21	3779	2679	384	716
ENST00000194900	DLG3	Q92796	ENSG00000082458	1741	9	242842	ENSG00000082458	21	6112	2550	341	3221
ENST00000195173	SEMA5B	Q9P283	ENSG00000082684	54437	1	69626	ENSG00000082684	22	4523	3174	399	950
ENST00000195649	SNAP91	O60641	ENSG00000065609	9892	9	100739	ENSG00000065609	30	4434	2709	314	1411
ENST00000196169	TDRD3	Q9H7E2	ENSG00000083544	81550	3	165834	ENSG00000083544	14	3019	1956	788	275
ENST00000196371	OXCT1	P55809	ENSG00000083720	5019	7	88452	ENSG00000083720	17	3294	1563	67	1664
ENST00000196551	RPS5	P46782	ENSG00000083845	6193	3	221304	ENSG00000083845	6	741	615	72	54
ENST00000198939	CHERP	Q8IWX8	ENSG00000085872	10523	3	223613	ENSG00000085872	17	4084	2784	37	1263
ENST00000199320	DIMT1	Q9UNQ2	ENSG00000086189	27292	5	88860	ENSG00000086189	12	2831	942	133	1756
ENST00000199448	EPDR1	Q9UM22	ENSG00000086289	54749	1	104423	ENSG00000086289	3	2515	675	300	1540
ENST00000199814	RBM22	Q9NW64	ENSG00000086589	55696	5	91541	ENSG00000086589	11	2299	1263	77	959
ENST00000199940	MAP2	P11137	ENSG00000078018	4133	8	48535	ENSG00000078018	15	2241	1680	440	121
ENST00000200135	ZW10	O43264	ENSG00000086827	9183	3	151034	ENSG00000086827	16	2873	2340	26	507
ENST00000200457	TRIP6	Q15654	ENSG00000087077	7205	1	106549	ENSG00000087077	9	1693	1431	111	151
ENST00000201031	TFAP2C	Q92754	ENSG00000087510	7022	1	230215	ENSG00000087510	7	2862	1353	239	1270
ENST00000201961	NOL4L	Q96MY1	ENSG00000197183	140688	9	231954	ENSG00000197183	6	971	748	0	223
ENST00000201963	DNMT3B	Q9UBC3	ENSG00000088305	1789	4	229020	ENSG00000088305	22	4255	2538	264	1453
ENST00000202028	EPB41L1	Q9H4G0	ENSG00000088367	2036	9	229247	ENSG00000088367	20	3514	2340	173	1001
ENST00000202556	PPP1R13B	Q96KQ4	ENSG00000088808	23368	7	176854	ENSG00000088808	17	5500	3273	268	1959
ENST00000202773	RPL6	Q02878	ENSG00000089009	6128	3	163595	ENSG00000089009	7	947	867	55	25
ENST00000202816	ESF1	Q9H501	ENSG00000089048	51575	5	231349	ENSG00000089048	14	3216	2556	108	552
ENST00000203166	HAUS5	O94927	ENSG00000249115	23354	1	218008	ENSG00000249115	19	4324	1902	60	2362
ENST00000203556	GMIP	Q9P107	ENSG00000089639	51291	7	223998	ENSG00000089639	21	3528	2913	128	487
ENST00000203664	OTUB2	Q96DC9	ENSG00000089723	78990	7	172234	ENSG00000089723	6	3911	705	198	3008
ENST00000204726	GOLGA3	Q08378	ENSG00000090615	2802	8	164637	ENSG00000090615	24	9414	4497	726	4191
ENST00000204961	EFNB1	P98172	ENSG00000090776	1947	1	242796	ENSG00000090776	5	3303	1041	756	1506
ENST00000205061	GLG1	Q92896	ENSG00000090863	2734	7	195559	ENSG00000090863	27	8261	3612	20	4629
ENST00000205194	NAT14	Q8WUY8	ENSG00000090971	57106	4	220849	ENSG00000090971	3	1350	621	119	610
ENST00000206020	SPAG7	O75391	ENSG00000091640	9552	2	203475	ENSG00000091640	7	1005	684	13	308
ENST00000206451	PSME1	Q06323	ENSG00000092010	5720	1	169519	ENSG00000092010	11	965	750	69	146
ENST00000206474	HAUS4	Q9H6D7	ENSG00000092036	54930	1	173821	ENSG00000092036	10	1642	1092	253	297
ENST00000206542	OSGEP	Q9NPF4	ENSG00000092094	55644	5	173428	ENSG00000092094	11	1976	1008	129	839
ENST00000209875	CBX5	P45973	ENSG00000094916	23468	4	161267	ENSG00000094916	5	11546	576	157	10813
ENST00000210060	DHPS	P49366	ENSG00000095059	1725	9	223065	ENSG00000095059	9	1345	1110	114	121
ENST00000210227	PTBP3	O95758	ENSG00000119314	9991	8	129542	ENSG00000119314	5	734	548	186	0
ENST00000210633	SEMA4G	Q9NTN9	ENSG00000095539	57715	9	133766	ENSG00000095539	14	4094	2532	78	1484
ENST00000211936	ZNF184	Q99676	ENSG00000096654	7738	5	98634	ENSG00000096654	6	3101	2256	285	560
ENST00000211998	VCL	P18206	ENSG00000035403	7414	1	132834	ENSG00000035403	22	5490	3405	94	1991
ENST00000212015	SIRT1	Q96EB6	ENSG00000096717	23411	6	132487	ENSG00000096717	9	4107	2244	66	1797
ENST00000215095	STX1B	P61266	ENSG00000099365	112755	9	193953	ENSG00000099365	10	4674	867	242	3565
ENST00000215565	NDUFB7	P17568	ENSG00000099795	4713	7	223407	ENSG00000099795	3	535	414	66	55
ENST00000215567	TECR	Q9NZ01	ENSG00000099797	9524	4	216282	ENSG00000099797	13	1139	927	103	109
ENST00000215730	SNAP29	O95721	ENSG00000099940	9342	8	236724	ENSG00000099940	5	4259	777	104	3378
ENST00000215832	MAPK1	P28482	ENSG00000100030	5594	1	239450	ENSG00000100030	9	11022	1083	189	9750
ENST00000215882	SLC25A1	P53007	ENSG00000100075	6576	7	239187	ENSG00000100075	9	1548	936	63	549
ENST00000215904	PDXP	Q96GD0	ENSG00000241360	57026	9	238055	ENSG00000241360	2	2012	891	60	1061
ENST00000215909	LGALS1	P09382	ENSG00000100097	3956	2	238057	ENSG00000100097	4	528	408	67	53
ENST00000215919	PATZ1	Q9HBE1	ENSG00000100105	23598	2	240095	ENSG00000100105	3	2516	1614	174	728
ENST00000215980	CENPM	Q9NSP4	ENSG00000100162	79019	1	240804	ENSG00000100162	6	938	543	76	319
ENST00000216038	RTCB	Q9Y3I0	ENSG00000100220	51493	3	240175	ENSG00000100220	12	2019	1518	91	410
ENST00000216080	LMF2	Q9BU23	ENSG00000100258	91289	5	241174	ENSG00000100258	14	2658	2049	169	440
ENST00000216083	CBX6	O95503	ENSG00000183741	23466	3	240633	ENSG00000183741	5	3191	1185	26	1980
ENST00000216121	NIPSNAP1	Q9BPW8	ENSG00000184117	8508	7	239899	ENSG00000184117	10	2013	855	31	1127
ENST00000216122	MCM5	P33992	ENSG00000100297	4174	1	237928	ENSG00000100297	17	3458	2205	77	1176
ENST00000216129	TTLL12	Q14166	ENSG00000100304	23170	9	240913	ENSG00000100304	14	3386	1935	65	1386
ENST00000216144	CABP7	Q86V35	ENSG00000100314	164633	4	237492	ENSG00000100314	5	3334	648	422	2264
ENST00000216155	SYNGR1	O43759	ENSG00000100321	9145	9	238245	ENSG00000100321	3	497	357	62	78
ENST00000216181	MYH9	P35579	ENSG00000100345	4627	2	240302	ENSG00000100345	41	7554	5883	280	1391
ENST00000216194	ADSL	P30566	ENSG00000239900	158	1	238314	ENSG00000239900	13	1620	1497	31	92
ENST00000216254	ACO2	Q99798	ENSG00000100412	50	9	238395	ENSG00000100412	18	2734	2343	30	361
ENST00000216277	PAPOLA	P51003	ENSG00000090060	10914	1	172407	ENSG00000090060	22	4519	2238	220	2061
ENST00000216288	MARK3	P27448	ENSG00000075413	4140	8	173034	ENSG00000075413	16	2911	2142	170	599
ENST00000216297	SUPT16H	Q9Y5B9	ENSG00000092201	11198	1	173628	ENSG00000092201	26	4433	3144	92	1197
ENST00000216327	ABHD4	Q8TB40	ENSG00000100439	63874	1	169265	ENSG00000100439	5	716	450	7	259
ENST00000216367	POLE2	P56282	ENSG00000100479	5427	1	174758	ENSG00000100479	19	1692	1584	11	97
ENST00000216392	PYGL	P06737	ENSG00000100504	5836	2	174884	ENSG00000100504	20	2799	2544	80	175
ENST00000216442	ATP6V1D	Q9Y5K8	ENSG00000100554	51382	9	175387	ENSG00000100554	9	1599	744	106	749
ENST00000216468	TMED8	Q6PL24	ENSG00000100580	283578	9	175933	ENSG00000100580	6	7761	978	41	6742
ENST00000216500	DHRS7	Q9Y394	ENSG00000100612	51635	2	175189	ENSG00000100612	8	2322	1020	456	846
ENST00000216639	VRK1	Q99986	ENSG00000100749	7443	3	172458	ENSG00000100749	13	1663	1191	71	401
ENST00000216714	APEX1	P27695	ENSG00000100823	328	6	168989	ENSG00000100823	5	1453	957	237	259
ENST00000216733	EFS	O43281	ENSG00000100842	10278	1	173956	ENSG00000100842	6	2653	1686	147	820
ENST00000216802	PSME2	Q9UL46	ENSG00000100911	5721	2	174054	ENSG00000100911	11	793	720	29	44
ENST00000216832	PNN	Q9H307	ENSG00000100941	5411	1	170115	ENSG00000100941	9	3537	2154	26	1357
ENST00000216840	RABGGTA	Q92696	ENSG00000100949	5875	9	174169	ENSG00000100949	17	2088	1704	307	77
ENST00000216879	NSFL1C	Q9UNZ2	ENSG00000088833	55968	6	230923	ENSG00000088833	9	3568	1113	868	1587
ENST00000216962	PYGB	P11216	ENSG00000100994	5834	6	228818	ENSG00000100994	20	4116	2532	94	1490
ENST00000217121	TPD52L2	O43399	ENSG00000101150	7165	5	230754	ENSG00000101150	9	2362	690	72	1600
ENST00000217182	EEF1A2	Q05639	ENSG00000101210	1917	9	233350	ENSG00000101210	8	1773	1392	97	284
ENST00000217246	MACROD2	A1Z1Q3	ENSG00000172264	140733	7	228472	ENSG00000172264	17	4994	1278	395	3321
ENST00000217402	CHMP4B	Q9H444	ENSG00000101421	128866	3	229074	ENSG00000101421	5	1602	675	121	806
ENST00000217426	AHCY	P23526	ENSG00000101444	191	1	232040	ENSG00000101444	10	2150	1299	85	766
ENST00000217456	APMAP	Q9HDC9	ENSG00000101474	57136	7	231621	ENSG00000101474	9	2202	1251	63	888
ENST00000217901	IDH3G	P51553	ENSG00000067829	3421	8	247939	ENSG00000067829	13	1335	1182	49	104
ENST00000217971	PGRMC1	O00264	ENSG00000101856	10857	4	243810	ENSG00000101856	3	1879	588	79	1212
ENST00000218089	STAG2	Q8N3U4	ENSG00000101972	10735	1	243917	ENSG00000101972	35	5218	3807	510	901
ENST00000218197	SLC25A14	O95258	ENSG00000102078	9016	9	243993	ENSG00000102078	10	1616	978	227	411
ENST00000218200	FMR1	Q06787	ENSG00000102081	2332	6	244316	ENSG00000102081	16	4333	1836	229	2268
ENST00000218230	PCSK1N	Q9UHG2	ENSG00000102109	27344	9	245693	ENSG00000102109	3	1025	783	78	164
ENST00000218340	RP2	O75695	ENSG00000102218	6102	1	242166	ENSG00000102218	5	3700	1053	58	2589
ENST00000218348	USP11	P51784	ENSG00000102226	8237	8	242219	ENSG00000102226	21	3338	2892	49	397
ENST00000218364	HTATSF1	O43719	ENSG00000102241	27336	4	244181	ENSG00000102241	9	2694	2268	93	333
ENST00000218439	MAGED2	Q9UNF1	ENSG00000102316	10916	1	242631	ENSG00000102316	12	1958	1821	125	12
ENST00000218516	GLA	P06280	ENSG00000102393	2717	5	246879	ENSG00000102393	7	1318	1290	22	6
ENST00000218789	ARHGEF7	Q14155	ENSG00000102606	8874	8	166732	ENSG00000102606	21	5233	2118	497	2618
ENST00000219150	CORO1A	P31146	ENSG00000102879	11151	9	188129	ENSG00000102879	11	1803	1386	305	112
ENST00000219252	POLR2C	P19387	ENSG00000102978	5432	5	189320	ENSG00000102978	9	1764	828	46	890
ENST00000219281	USB1	Q9BQ65	ENSG00000103005	79650	9	189447	ENSG00000103005	7	2282	798	111	1373
ENST00000219302	NME3	Q13232	ENSG00000103024	4832	9	191851	ENSG00000103024	5	1069	510	196	363
ENST00000219345	PLA2G15	Q8NCC3	ENSG00000103066	23659	9	190049	ENSG00000103066	6	2694	1239	54	1401
ENST00000219439	HSDL1	Q3SXM5	ENSG00000103160	83693	9	196016	ENSG00000103160	6	3648	993	166	2489
ENST00000219476	TSC2	P49815	ENSG00000103197	7249	8	186133	ENSG00000103197	42	6415	5424	110	881
ENST00000219689	USP31	Q70CQ4	ENSG00000103404	57478	9	193360	ENSG00000103404	16	10699	4059	0	6640
ENST00000219700	HMOX2	P30519	ENSG00000103415	3163	8	186665	ENSG00000103415	6	1621	951	80	590
ENST00000219782	MAZ	P56270	ENSG00000103495	4150	3	187984	ENSG00000103495	6	2698	1482	106	1110
ENST00000219837	KNOP1	Q1ED39	ENSG00000103550	400506	1	193147	ENSG00000103550	5	6422	1377	72	4973
ENST00000220003	CSK	P41240	ENSG00000103653	1445	9	180015	ENSG00000103653	13	2767	1353	729	685
ENST00000220429	GABPB1	Q06547	ENSG00000104064	2553	2	182843	ENSG00000104064	9	2726	1188	169	1369
ENST00000220478	SCG3	Q8WXD2	ENSG00000104112	29106	9	179030	ENSG00000104112	12	3160	1407	253	1500
ENST00000220496	DNAJC17	Q9NVM6	ENSG00000104129	55192	5	182253	ENSG00000104129	11	3721	915	27	2779
ENST00000220509	VPS18	Q9P253	ENSG00000104142	57617	8	178334	ENSG00000104142	5	3875	2922	319	634
ENST00000220562	EXTL3	O43909	ENSG00000012232	2137	7	115057	ENSG00000012232	7	8221	2760	728	4733
ENST00000220584	FDFT1	P37268	ENSG00000079459	2222	4	114338	ENSG00000079459	8	2035	1254	92	689
ENST00000220592	AGO2	Q9UKV8	ENSG00000123908	27161	3	122635	ENSG00000123908	19	14595	2580	127	11888
ENST00000220597	PAG1	Q9NWQ8	ENSG00000076641	55824	6	120884	ENSG00000076641	9	10744	1299	711	8734
ENST00000220669	ZFAND1	Q8TCF1	ENSG00000104231	79752	9	120920	ENSG00000104231	8	2184	807	19	1358
ENST00000220764	DECR1	Q16698	ENSG00000104325	1666	2	116800	ENSG00000104325	10	2760	1008	16	1736
ENST00000220772	SFRP1	Q8N474	ENSG00000104332	6422	1	119898	ENSG00000104332	3	4464	945	314	3205
ENST00000220822	GDAP1	Q8TB36	ENSG00000104381	54332	8	116526	ENSG00000104381	6	3645	1077	59	2509
ENST00000220847	PHF20L1	A8MW92	ENSG00000129292	51105	9	118008	ENSG00000129292	20	3297	2976	321	0
ENST00000220849	EIF3E	P60228	ENSG00000104408	3646	3	121769	ENSG00000104408	13	2022	1338	15	669
ENST00000220876	STMN2	Q93045	ENSG00000104435	11075	9	116592	ENSG00000104435	5	2223	540	382	1301
ENST00000220913	CHRAC1	Q9NRG0	ENSG00000104472	54108	1	118137	ENSG00000104472	3	2481	396	178	1907
ENST00000220931	NCALD	P61601	ENSG00000104490	83988	4	121599	ENSG00000104490	4	3476	582	127	2767
ENST00000220959	UBR5	O95071	ENSG00000104517	51366	5	121644	ENSG00000104517	59	9418	8397	455	566
ENST00000221086	MTMR9	Q96QG7	ENSG00000104643	66036	8	114282	ENSG00000104643	10	7081	1650	73	5358
ENST00000221114	DCTN6	O00399	ENSG00000104671	10671	8	115120	ENSG00000104671	7	1054	573	15	466
ENST00000221130	GSR	P00390	ENSG00000104687	2936	8	119626	ENSG00000104687	13	3034	1569	11	1454
ENST00000221166	NEFM	P07197	ENSG00000104722	4741	7	114882	ENSG00000104722	3	3271	2751	33	487
ENST00000221222	HOMER3	Q9NSC5	ENSG00000051128	9454	2	223886	ENSG00000051128	9	1384	1077	67	240
ENST00000221233	EXOSC5	Q9NQT4	ENSG00000077348	56915	5	225477	ENSG00000077348	6	998	708	31	259
ENST00000221419	HNRNPL	P14866	ENSG00000104824	3191	3	225158	ENSG00000104824	13	2471	1770	367	334
ENST00000221486	RNASEH2A	O75792	ENSG00000104889	10535	1	216100	ENSG00000104889	8	2753	900	118	1735
ENST00000221566	SGTA	O43765	ENSG00000104969	6449	9	221789	ENSG00000104969	12	2231	942	64	1225
ENST00000221855	TBCB	Q99426	ENSG00000105254	1155	9	218138	ENSG00000105254	6	987	735	93	159
ENST00000221856	FSD1	Q9BTV5	ENSG00000105255	79187	9	215050	ENSG00000105255	13	1833	1491	149	193
ENST00000221891	APLP1	P51693	ENSG00000105290	333	9	218102	ENSG00000105290	17	2495	1956	192	347
ENST00000221922	CCDC9	Q9Y3X0	ENSG00000105321	26093	2	219571	ENSG00000105321	12	2027	1596	156	275
ENST00000221957	PLIN3	O60664	ENSG00000105355	10226	1	222063	ENSG00000105355	8	2232	1305	76	851
ENST00000222120	RAB3D	O95716	ENSG00000105514	9545	9	222860	ENSG00000105514	5	4240	660	250	3330
ENST00000222219	DNASE2	O00115	ENSG00000105612	1777	3	223160	ENSG00000105612	6	1938	1083	74	781
ENST00000222247	RPL18A	Q02543	ENSG00000105640	6142	3	216854	ENSG00000105640	5	634	531	47	56
ENST00000222254	PIK3R2	O00459	ENSG00000105647	5296	7	216892	ENSG00000105647	16	3980	2187	555	1238
ENST00000222256	RAB3A	P20336	ENSG00000105649	5864	9	223777	ENSG00000105649	5	1496	663	147	686
ENST00000222308	FKBP8	Q14318	ENSG00000105701	23770	7	223843	ENSG00000105701	9	1710	1239	64	407
ENST00000222330	GSK3A	P49840	ENSG00000105723	2931	9	225621	ENSG00000105723	11	2193	1452	137	604
ENST00000222374	CADM4	Q8NFZ8	ENSG00000105767	199731	6	225818	ENSG00000105767	9	2189	1167	60	962
ENST00000222572	PON2	Q15165	ENSG00000105854	5445	1	111602	ENSG00000105854	9	1610	1065	77	468
ENST00000222573	ITGB8	P26012	ENSG00000105855	3696	1	103746	ENSG00000105855	14	8974	2310	907	5757
ENST00000222673	OGDH	Q02218	ENSG00000105953	4967	9	104621	ENSG00000105953	23	4193	3072	54	1067
ENST00000222792	CHN2	P52757	ENSG00000106069	1124	7	104091	ENSG00000106069	13	3530	1407	530	1593
ENST00000222803	FKBP14	Q9NWM8	ENSG00000106080	55033	2	109673	ENSG00000106080	4	4960	636	176	4148
ENST00000222812	STX1A	Q16623	ENSG00000106089	6804	9	110885	ENSG00000106089	10	2102	867	38	1197
ENST00000223023	WASL	O00401	ENSG00000106299	8976	2	112705	ENSG00000106299	11	4363	1518	269	2576
ENST00000223073	RBM28	Q9NW13	ENSG00000106344	55131	5	112794	ENSG00000106344	19	15507	2280	115	13112
ENST00000223129	RPA3	P35244	ENSG00000106399	6119	1	109127	ENSG00000106399	8	2020	366	1172	482
ENST00000223136	FIS1	Q9Y3D6	ENSG00000214253	51024	9	112066	ENSG00000214253	5	870	459	77	334
ENST00000223145	GLCCI1	Q86VQ1	ENSG00000106415	113263	1	103524	ENSG00000106415	8	4741	1644	555	2542
ENST00000223215	MEST	Q5EB52	ENSG00000106484	4232	4	107571	ENSG00000106484	12	2646	1008	229	1409
ENST00000223361	POLD2	P49005	ENSG00000106628	5425	4	110109	ENSG00000106628	10	1597	1368	143	86
ENST00000223369	YKT6	O15498	ENSG00000106636	10652	9	104607	ENSG00000106636	7	2767	597	158	2012
ENST00000223398	CLIP2	Q9UDT6	ENSG00000106665	7461	8	105399	ENSG00000106665	17	5563	3141	327	2095
ENST00000223500	CHMP5	Q9NZZ3	ENSG00000086065	51510	8	123777	ENSG00000086065	8	1901	660	30	1211
ENST00000223836	AK1	P00568	ENSG00000106992	203	9	130014	ENSG00000106992	6	736	633	96	7
ENST00000223865	TBC1D13	Q9NVG8	ENSG00000107021	54662	4	126261	ENSG00000107021	10	3378	828	5	2545
ENST00000223951	ELAVL2	Q12926	ENSG00000107105	1993	6	127613	ENSG00000107105	6	3763	1041	269	2453
ENST00000224140	SETX	Q7Z333	ENSG00000107290	23064	2	130302	ENSG00000107290	26	11101	8034	184	2883
ENST00000224237	VIM	P08670	ENSG00000026025	7431	1	131353	ENSG00000026025	9	1868	1401	145	322
ENST00000224807	SFXN3	Q9BWM7	ENSG00000107819	81855	9	133790	ENSG00000107819	12	3089	978	456	1655
ENST00000224949	PITRM1	Q5JRX3	ENSG00000107959	10531	8	134907	ENSG00000107959	27	3427	3114	10	303
ENST00000225174	PPIF	P30405	ENSG00000108179	10105	3	133057	ENSG00000108179	6	2196	624	80	1492
ENST00000225394	GIT1	Q9Y2X7	ENSG00000108262	28964	9	205245	ENSG00000108262	20	3768	2286	249	1233
ENST00000225441	RUNDC3A	Q59EK9	ENSG00000108309	10900	9	199836	ENSG00000108309	11	1821	1218	237	366
ENST00000225525	TAX1BP3	O14907	ENSG00000213977	30851	4	203315	ENSG00000213977	4	1280	375	52	853
ENST00000225577	RPS6KB1	P23443	ENSG00000108443	6198	6	201070	ENSG00000108443	15	5428	1578	64	3786
ENST00000225655	PFN1	P07737	ENSG00000108518	5216	1	203471	ENSG00000108518	3	1291	423	620	248
ENST00000225665	SLC25A11	Q02978	ENSG00000108528	8402	9	203466	ENSG00000108528	8	1692	945	136	611
ENST00000225698	C1QBP	Q07021	ENSG00000108561	708	7	203543	ENSG00000108561	6	1169	849	82	238
ENST00000225719	CPD	O75976	ENSG00000108582	1362	7	198676	ENSG00000108582	21	9372	4143	54	5175
ENST00000225726	CCDC47	Q96A33	ENSG00000108588	57003	1	208015	ENSG00000108588	13	3283	1452	205	1626
ENST00000225777	SYNGR2	O43760	ENSG00000108639	9144	3	202277	ENSG00000108639	4	2325	675	59	1591
ENST00000225916	KAT2A	Q92830	ENSG00000108773	2648	3	206298	ENSG00000108773	18	3115	2514	63	538
ENST00000226004	DUSP3	P51452	ENSG00000108861	1845	7	206609	ENSG00000108861	3	4095	558	53	3484
ENST00000226299	LAP3	P28838	ENSG00000002549	51056	2	73401	ENSG00000002549	13	2213	1560	274	379
ENST00000226319	JADE1	Q6IE81	ENSG00000077684	79960	1	75966	ENSG00000077684	11	5695	2529	204	2962
ENST00000226328	RUFY3	Q7L099	ENSG00000018189	22902	8	74498	ENSG00000018189	13	4233	1410	563	2260
ENST00000227266	CTSC	P53634	ENSG00000109861	1075	4	150313	ENSG00000109861	7	1870	1392	64	414
ENST00000227503	SF1	Q15637	ENSG00000168066	7536	2	148737	ENSG00000168066	13	2850	1647	355	848
ENST00000227520	CCDC86	Q9H6F5	ENSG00000110104	79080	1	141410	ENSG00000110104	4	1851	1083	12	756
ENST00000227638	PANX1	Q96RD7	ENSG00000110218	24145	9	143757	ENSG00000110218	5	2852	1281	472	1099
ENST00000227758	BIRC2	Q13490	ENSG00000110330	329	1	143926	ENSG00000110330	9	3743	1857	1399	487
ENST00000227868	PDHX	O00330	ENSG00000110435	8050	9	140326	ENSG00000110435	11	2500	1506	38	956
ENST00000228251	YBX3	P16989	ENSG00000060138	8531	1	159344	ENSG00000060138	10	1931	1119	212	600
ENST00000228284	SART3	Q15020	ENSG00000075856	9733	6	163245	ENSG00000075856	19	3704	2946	5	753
ENST00000228318	SLC25A3	Q00325	ENSG00000075415	5250	3	156613	ENSG00000075415	8	1678	1089	120	469
ENST00000228510	MVK	Q03426	ENSG00000110921	4598	4	157092	ENSG00000110921	11	2833	1191	94	1548
ENST00000228740	LTA4H	P09960	ENSG00000111144	4048	1	162851	ENSG00000111144	19	2140	1836	68	236
ENST00000228825	ARPC3	O15145	ENSG00000111229	10094	9	163416	ENSG00000111229	7	946	537	77	332
ENST00000228872	CDKN1B	P46527	ENSG00000111276	1027	6	153026	ENSG00000111276	3	2411	597	472	1342
ENST00000229179	NUP107	P57740	ENSG00000111581	57122	1	155784	ENSG00000111581	28	6213	2778	88	3347
ENST00000229201	TIMELESS	Q9UNS1	ENSG00000111602	8914	1	161601	ENSG00000111602	29	4376	3624	155	597
ENST00000229214	KRR1	Q13601	ENSG00000111615	11103	5	162365	ENSG00000111615	10	10104	1146	12	8946
ENST00000229239	GAPDH	P04406	ENSG00000111640	2597	4	152432	ENSG00000111640	9	1285	1008	76	201
ENST00000229270	TPI1	P60174	ENSG00000111669	7167	4	152528	ENSG00000111669	7	1763	861	337	565
ENST00000229277	ENO2	P09104	ENSG00000111674	2026	9	152565	ENSG00000111674	12	2294	1305	92	897
ENST00000229329	CMAS	Q8NFW8	ENSG00000111726	55907	9	153329	ENSG00000111726	8	1748	1305	86	357
ENST00000229340	RAB35	Q15286	ENSG00000111737	11021	8	163871	ENSG00000111737	6	2855	606	103	2146
ENST00000229395	FGFR1OP2	Q9NVK5	ENSG00000111790	26127	3	153470	ENSG00000111790	7	2932	762	255	1915
ENST00000229471	FYN	P06241	ENSG00000010810	2534	6	101424	ENSG00000010810	11	2009	1449	103	457
ENST00000229595	ASF1A	Q9Y294	ENSG00000111875	25842	5	96528	ENSG00000111875	4	2434	615	262	1557
ENST00000229633	HINT3	Q9NQE9	ENSG00000111911	135114	8	96650	ENSG00000111911	5	3325	549	208	2568
ENST00000229854	MCM3	P25205	ENSG00000112118	4172	1	100164	ENSG00000112118	16	3095	2457	64	574
ENST00000229922	CAP2	P40123	ENSG00000112186	10486	9	93249	ENSG00000112186	13	2925	1434	153	1338
ENST00000230048	ACOT13	Q9NPJ3	ENSG00000112304	55856	7	93437	ENSG00000112304	3	4041	423	187	3431
ENST00000230122	ZBTB24	O43167	ENSG00000112365	9841	5	101336	ENSG00000112365	7	5519	2094	168	3257
ENST00000230418	PTK7	Q13308	ENSG00000112655	5754	3	95017	ENSG00000112655	19	3958	2451	147	1360
ENST00000230419	PTK7	Q13308	ENSG00000112655	5754	3	95014	ENSG00000112655	20	4222	3213	175	834
ENST00000230431	DNPH1	O43598	ENSG00000112667	10591	1	99947	ENSG00000112667	4	657	525	28	104
ENST00000230449	EXOC2	Q96KP1	ENSG00000112685	55770	9	97890	ENSG00000112685	28	4456	2775	164	1517
ENST00000230461	TMEM30A	Q9NV96	ENSG00000112697	55754	7	100616	ENSG00000112697	7	4418	1086	154	3178
ENST00000230771	HARS2	P49590	ENSG00000112855	23438	8	85772	ENSG00000112855	13	2468	1521	194	753
ENST00000230792	NUDT12	Q9BQG2	ENSG00000112874	83594	3	89965	ENSG00000112874	7	3488	1389	93	2006
ENST00000230895	DAP	P51397	ENSG00000112977	1611	3	87844	ENSG00000112977	4	2339	309	204	1826
ENST00000230901	BRD8	Q9H0E9	ENSG00000112983	10902	2	90861	ENSG00000112983	22	3198	2856	16	326
ENST00000231061	SPARC	P09486	ENSG00000113140	6678	1	91633	ENSG00000113140	10	3451	912	64	2475
ENST00000231368	LNPEP	Q9UIQ6	ENSG00000113441	4012	1	84531	ENSG00000113441	18	12134	3078	76	8980
ENST00000231498	NUP155	O75694	ENSG00000113569	9631	1	88307	ENSG00000113569	35	8068	4176	129	3763
ENST00000231524	TRIM23	P36406	ENSG00000113595	373	5	88906	ENSG00000113595	11	3863	1725	59	2079
ENST00000231790	MLH1	P40692	ENSG00000076242	4292	1	59625	ENSG00000076242	19	2752	2271	216	265
ENST00000232564	GNB4	Q9HAV0	ENSG00000114450	59345	2	71523	ENSG00000114450	10	6315	1023	167	5125
ENST00000232905	EIF1B	O60739	ENSG00000114784	10289	5	59863	ENSG00000114784	4	987	342	235	410
ENST00000232978	NKTR	P30414	ENSG00000114857	4820	5	60009	ENSG00000114857	17	7265	4389	116	2760
ENST00000233057	EIF2AK2	P19525	ENSG00000055332	5610	1	51514	ENSG00000055332	17	9975	1656	256	8063
ENST00000233092	FKBP7	Q9Y680	ENSG00000079150	51661	8	56198	ENSG00000079150	5	1030	384	76	570
ENST00000233099	HEATR5B	Q9P2D3	ENSG00000008869	54497	8	51510	ENSG00000008869	36	6937	6216	126	595
ENST00000233114	MDH1	P40925	ENSG00000014641	4190	7	43699	ENSG00000014641	9	1296	1005	81	210
ENST00000233121	MAPRE3	Q9UPY8	ENSG00000084764	22924	9	42435	ENSG00000084764	7	1890	846	173	871
ENST00000233143	TMSB10	P63313	ENSG00000034510	9168	9	44423	ENSG00000034510	3	461	135	78	248
ENST00000233146	MSH2	P43246	ENSG00000095002	4436	1	43341	ENSG00000095002	16	3307	2805	223	279
ENST00000233154	NCK2	O43639	ENSG00000071051	8440	9	45274	ENSG00000071051	5	2666	1143	427	1096
ENST00000233190	NDUFS1	P28331	ENSG00000023228	4719	3	56947	ENSG00000023228	19	11660	2184	108	9368
ENST00000233336	TTL	Q8NG68	ENSG00000114999	150465	8	45518	ENSG00000114999	7	14267	1134	189	12944
ENST00000233379	FAHD2A	Q96GK7	ENSG00000115042	51011	1	44785	ENSG00000115042	8	4775	945	171	3659
ENST00000233575	SNX17	Q15036	ENSG00000115234	9784	5	42535	ENSG00000115234	15	2357	1413	128	816
ENST00000233607	APC2	O95996	ENSG00000115266	10297	8	214750	ENSG00000115266	15	10151	6912	208	3031
ENST00000233609	RPS15	P62841	ENSG00000115268	6209	3	214733	ENSG00000115268	4	534	357	145	32
ENST00000233612	GCA	P28676	ENSG00000115271	25801	1	46983	ENSG00000115271	8	1694	597	218	879
ENST00000233627	NDUFS7	O75251	ENSG00000115286	374291	9	214711	ENSG00000115286	8	758	642	20	96
ENST00000233714	LANCL1	O43813	ENSG00000115365	10314	7	57084	ENSG00000115365	10	1647	1200	75	372
ENST00000233809	IGFBP2	P18065	ENSG00000115457	3485	1	48736	ENSG00000115457	4	1414	978	104	332
ENST00000233813	IGFBP5	P24593	ENSG00000115461	3488	6	57211	ENSG00000115461	4	6239	819	774	4646
ENST00000234301	COX7A2L	O14548	ENSG00000115944	9167	9	51725	ENSG00000115944	3	2282	345	56	1881
ENST00000234310	PPP3R1	P63098	ENSG00000221823	5534	9	52574	ENSG00000221823	6	3024	513	405	2106
ENST00000234420	MSH6	P52701	ENSG00000116062	2956	1	43363	ENSG00000116062	10	7476	4083	152	3241
ENST00000234454	SPR	P35270	ENSG00000116096	6697	1	44097	ENSG00000116096	3	1432	786	25	621
ENST00000234590	ENO1	P06733	ENSG00000074800	2023	4	32871	ENSG00000074800	12	1781	1305	116	360
ENST00000235329	MFN2	O95140	ENSG00000116688	9927	8	22677	ENSG00000116688	19	4539	2274	322	1943
ENST00000235521	WARS2	Q9UGM6	ENSG00000116874	10352	6	37291	ENSG00000116874	6	2800	1083	27	1690
ENST00000235835	AKR7A2	O43488	ENSG00000053371	8574	1	33325	ENSG00000053371	7	1362	1080	22	260
ENST00000235932	RAB29	O14966	ENSG00000117280	8934	5	40234	ENSG00000117280	6	1723	612	206	905
ENST00000235958	HMGCL	P35914	ENSG00000117305	3155	4	33599	ENSG00000117305	5	1101	548	0	553
ENST00000236051	EBNA1BP2	Q99848	ENSG00000117395	10969	5	34737	ENSG00000117395	9	1322	921	142	259
ENST00000236192	VAMP4	O75379	ENSG00000117533	8674	8	39331	ENSG00000117533	8	4977	426	205	4346
ENST00000236698	STAG1	Q8WVM7	ENSG00000118007	10274	2	70291	ENSG00000118007	33	5951	3666	267	2018
ENST00000236925	CAMSAP2	Q08AD1	ENSG00000118200	23271	9	30159	ENSG00000118200	18	7161	4470	49	2642
ENST00000236957	EEF1B2	P24534	ENSG00000114942	1933	3	48425	ENSG00000114942	7	844	678	121	45
ENST00000236959	ATIC	P31939	ENSG00000138363	471	3	48657	ENSG00000138363	16	1972	1779	84	109
ENST00000237264	TBPL1	P62380	ENSG00000028839	9519	9	96862	ENSG00000028839	7	4199	561	246	3392
ENST00000237500	MYL12B	O14950	ENSG00000118680	103910	5	210090	ENSG00000118680	4	1210	519	344	347
ENST00000237530	RPN2	P04844	ENSG00000118705	6185	1	229317	ENSG00000118705	17	2227	1896	27	304
ENST00000237536	SOGA1	O94964	ENSG00000149639	140710	8	232322	ENSG00000149639	15	14218	4986	194	9038
ENST00000237858	GLRX	P35754	ENSG00000173221	2745	9	89814	ENSG00000173221	3	932	321	64	547
ENST00000237889	NDUFB3	O43676	ENSG00000119013	4709	7	48162	ENSG00000119013	3	493	297	61	135
ENST00000237937	ZFAND5	O76080	ENSG00000107372	7763	5	128541	ENSG00000107372	6	5310	642	140	4528
ENST00000238081	YWHAQ	P27348	ENSG00000134308	10971	9	50735	ENSG00000134308	6	2196	738	139	1319
ENST00000238112	CPSF3	Q9UKF6	ENSG00000119203	51692	1	41945	ENSG00000119203	18	2259	2055	120	84
ENST00000238146	DDX55	Q8NHQ9	ENSG00000111364	57696	5	157886	ENSG00000111364	14	2656	1803	50	803
ENST00000238156	CCDC92	Q53HC0	ENSG00000119242	80212	9	164299	ENSG00000119242	5	2787	996	355	1436
ENST00000238379	HDHD3	Q9BSH5	ENSG00000119431	81932	9	129605	ENSG00000119431	2	1834	756	898	180
ENST00000238483	APC2	O95996	ENSG00000115266	10297	8	214754	ENSG00000115266	14	2394	2192	202	0
ENST00000238497	VPS4B	O75351	ENSG00000119541	9525	5	214044	ENSG00000119541	11	3337	1335	217	1785
ENST00000238616	NEK9	Q8TD19	ENSG00000119638	91754	1	175836	ENSG00000119638	22	8278	2940	127	5211
ENST00000238633	NPC2	P61916	ENSG00000119655	10577	3	175757	ENSG00000119655	5	796	447	17	332
ENST00000238647	IRF2BPL	Q9H1B7	ENSG00000119669	64207	7	175895	ENSG00000119669	1	4166	2391	916	859
ENST00000238671	DLST	P36957	ENSG00000119689	1743	6	171528	ENSG00000119689	14	1464	204	38	1222
ENST00000238721	TP53I3	Q53FA7	ENSG00000115129	9540	1	51028	ENSG00000115129	5	1653	999	508	146
ENST00000238788	TMEM214	Q6NUQ4	ENSG00000119777	54867	5	42447	ENSG00000119777	17	2978	2070	51	857
ENST00000238875	LGALSL	Q3ZCW2	ENSG00000119862	29094	9	43760	ENSG00000119862	5	3856	519	384	2953
ENST00000239026	HELLS	Q9NRZ9	ENSG00000119969	3070	1	133501	ENSG00000119969	20	2740	2145	119	476
ENST00000239690	NUDCD1	Q96RS6	ENSG00000120526	84955	1	121793	ENSG00000120526	10	3919	1752	77	2090
ENST00000240055	NFYB	P25208	ENSG00000120837	4801	1	163139	ENSG00000120837	8	3424	624	149	2651
ENST00000240123	SORBS3	O60504	ENSG00000120896	10174	3	114731	ENSG00000120896	21	3459	2016	383	1060
ENST00000240185	TARDBP	Q13148	ENSG00000120948	23435	3	22554	ENSG00000120948	6	5367	1245	356	3766
ENST00000240285	RDH10	Q8IZV5	ENSG00000121039	157506	1	116487	ENSG00000121039	6	3959	1026	688	2245
ENST00000240316	COIL	P38432	ENSG00000121058	8161	9	207542	ENSG00000121058	7	2634	1731	31	872
ENST00000240423	NCAPH	Q15003	ENSG00000121152	23397	1	44836	ENSG00000121152	18	6030	2226	64	3740
ENST00000240487	TMEM131L	A2VDJ0	ENSG00000121210	23240	2	76487	ENSG00000121210	29	4299	4164	0	135
ENST00000240488	MND1	Q9BWT6	ENSG00000121211	84057	1	76480	ENSG00000121211	8	929	618	50	261
ENST00000240851	TFG	Q92734	ENSG00000114354	10342	1	61831	ENSG00000114354	8	1907	1203	271	433
ENST00000240874	KALRN	O60229	ENSG00000160145	8997	8	62506	ENSG00000160145	34	6537	4992	157	1388
ENST00000240922	NAA50	Q9GZZ1	ENSG00000121579	80218	1	69346	ENSG00000121579	5	6112	510	300	5302
ENST00000241001	PAX6	P26367	ENSG00000007372	5080	1	147134	ENSG00000007372	13	1736	1269	446	21
ENST00000241014	MAPK8IP1	Q9UQF2	ENSG00000121653	9479	4	140689	ENSG00000121653	12	3050	2136	170	744
ENST00000241337	GSTM2	P28161	ENSG00000213366	2946	3	26954	ENSG00000213366	8	1166	657	59	450
ENST00000241416	ACVR2A	P27037	ENSG00000121989	92	7	46640	ENSG00000121989	11	5214	1542	124	3548
ENST00000241502	FYTTD1	Q96QD9	ENSG00000122068	84248	9	65527	ENSG00000122068	9	6733	957	89	5687
ENST00000241704	COPA	P53621	ENSG00000122218	1314	6	38865	ENSG00000122218	33	5318	3675	80	1563
ENST00000242059	SCRN1	Q12765	ENSG00000136193	9805	1	109664	ENSG00000136193	8	5254	1245	161	3848
ENST00000242140	WIPF3	A6NGB9	ENSG00000122574	644150	6	104120	ENSG00000122574	9	4184	1452	182	2550
ENST00000242209	FKBP9	O95302	ENSG00000122642	11328	1	104241	ENSG00000122642	10	3424	1713	134	1577
ENST00000242275	SLC25A51	Q9H1U9	ENSG00000122696	92014	9	128130	ENSG00000122696	3	1171	894	224	53
ENST00000242285	CLTA	P09496	ENSG00000122705	1211	9	124040	ENSG00000122705	7	1152	747	120	285
ENST00000242315	PHF24	Q9UPV7	ENSG00000122733	23349	7	123925	ENSG00000122733	8	5718	1203	82	4433
ENST00000242351	ZC3HAV1	Q7Z2W4	ENSG00000105939	56829	2	113171	ENSG00000105939	13	7177	2709	389	4079
ENST00000242576	UNG	P13051	ENSG00000076248	7374	1	157048	ENSG00000076248	7	2071	942	106	1023
ENST00000242577	DYNLL1	P63167	ENSG00000088986	8655	7	157575	ENSG00000088986	3	663	270	110	283
ENST00000242591	IFT81	Q8WYA0	ENSG00000122970	28981	4	157134	ENSG00000122970	19	3124	2031	526	567
ENST00000242719	RNF11	Q9Y3C5	ENSG00000123091	26994	9	25166	ENSG00000123091	3	3074	465	484	2125
ENST00000242784	TRIR	Q9BQ61	ENSG00000123144	79002	6	223113	ENSG00000123144	3	879	531	27	321
ENST00000243040	PFDN5	Q99471	ENSG00000123349	5204	7	154695	ENSG00000123349	5	564	201	26	337
ENST00000243167	FAAH	O00519	ENSG00000117480	2166	9	25038	ENSG00000117480	15	2042	1740	32	270
ENST00000243286	TCEAL3	Q969E4	ENSG00000196507	85012	9	243476	ENSG00000196507	3	1124	603	262	259
ENST00000243298	RAB9B	Q9NP90	ENSG00000123570	51209	9	246997	ENSG00000123570	3	3772	606	314	2852
ENST00000243326	RIF1	Q5UIP0	ENSG00000080345	55183	1	46749	ENSG00000080345	35	15003	7419	483	7101
ENST00000243498	EXOSC9	Q06265	ENSG00000123737	5393	1	75794	ENSG00000123737	12	1481	1320	108	53
ENST00000243563	SNRPA	P09012	ENSG00000077312	6626	3	218788	ENSG00000077312	6	1277	849	206	222
ENST00000243893	UBE2C	O00762	ENSG00000175063	11065	1	229816	ENSG00000175063	4	476	153	38	285
ENST00000243997	ATP5F1E	P56381	ENSG00000124172	514	9	233132	ENSG00000124172	3	3610	156	84	3370
ENST00000244007	PLCG1	P19174	ENSG00000124181	5335	6	229480	ENSG00000124181	33	5285	3876	197	1212
ENST00000244020	SRSF6	Q13247	ENSG00000124193	6431	1	229529	ENSG00000124193	6	4353	1035	138	3180
ENST00000244061	RNF114	Q9Y508	ENSG00000124226	55905	2	230003	ENSG00000124226	6	2447	687	16	1744
ENST00000244230	MPHOSPH10	O00566	ENSG00000124383	10199	5	44042	ENSG00000124383	11	2164	2046	32	86
ENST00000244364	DST	Q03001	ENSG00000151914	667	4	100290	ENSG00000151914	84	16742	15516	208	1018
ENST00000244458	PACSIN1	Q9BY11	ENSG00000124507	29993	9	94626	ENSG00000124507	10	4286	1335	258	2693
ENST00000244741	CDKN1A	P38936	ENSG00000124762	1026	1	94763	ENSG00000124762	3	2180	495	146	1539
ENST00000244745	SOX4	Q06945	ENSG00000124766	6659	8	93291	ENSG00000124766	1	4869	1425	784	2660
ENST00000244776	DEK	P35659	ENSG00000124795	7913	1	98417	ENSG00000124795	10	1441	1026	166	249
ENST00000244777	BLOC1S5	Q8TDH9	ENSG00000188428	63915	1	98173	ENSG00000188428	6	2445	345	17	2083
ENST00000244815	LRRFIP1	Q32MZ4	ENSG00000124831	9208	1	49801	ENSG00000124831	10	4370	2355	240	1775
ENST00000245206	GOT2	P00505	ENSG00000125166	2806	7	194738	ENSG00000125166	10	2421	1293	88	1040
ENST00000245304	RAP2A	P10114	ENSG00000125249	5911	5	166269	ENSG00000125249	2	5540	552	302	4686
ENST00000245479	SOX9	P48436	ENSG00000125398	6662	1	201618	ENSG00000125398	3	3931	1530	372	2029
ENST00000245552	NT5C	Q8TCD5	ENSG00000125458	30833	1	208751	ENSG00000125458	5	901	606	35	260
ENST00000245816	CLPP	Q16740	ENSG00000125656	8192	9	215254	ENSG00000125656	6	2410	834	44	1532
ENST00000245857	RPL23	P62829	ENSG00000125691	9349	3	205828	ENSG00000125691	5	588	246	291	51
ENST00000246024	TMX4	Q9H1E5	ENSG00000125827	56255	8	231238	ENSG00000125827	8	6103	1050	148	4905
ENST00000246043	RRBP1	Q9P2E9	ENSG00000125844	6238	1	231409	ENSG00000125844	23	4737	4233	0	504
ENST00000246069	DSTN	P60981	ENSG00000125868	11034	7	228512	ENSG00000125868	4	3405	498	134	2773
ENST00000246149	ANKHD1	Q8IWZ3	ENSG00000131503	54882	1	85710	ENSG00000131503	17	2062	2062	0	0
ENST00000246151	PITHD1	Q9GZP4	ENSG00000057757	57095	9	23231	ENSG00000057757	6	1590	636	98	856
ENST00000246314	AGO3	Q9H9G7	ENSG00000126070	192669	6	24106	ENSG00000126070	17	3211	1881	613	717
ENST00000246337	UROD	P06132	ENSG00000126088	7389	5	24910	ENSG00000126088	10	1193	1104	12	77
ENST00000246489	KLC1	Q07866	ENSG00000126214	3831	9	173086	ENSG00000126214	16	2294	1914	255	125
ENST00000246505	PCID2	Q5JVF3	ENSG00000126226	55795	4	168805	ENSG00000126226	15	1786	1362	35	389
ENST00000246533	CAPNS1	P04632	ENSG00000126247	826	3	218154	ENSG00000126247	11	1428	807	107	514
ENST00000246747	ARL2	P36404	ENSG00000213465	402	4	141938	ENSG00000213465	5	932	555	48	329
ENST00000246802	NOP53	Q9NZM5	ENSG00000105373	29997	1	219600	ENSG00000105373	13	1504	1437	14	53
ENST00000246868	SBDS	Q9Y3A5	ENSG00000126524	51119	5	110746	ENSG00000126524	5	1613	753	169	691
ENST00000247003	DDX49	Q9Y6V7	ENSG00000105671	54555	5	217019	ENSG00000105671	13	1793	1452	27	314
ENST00000247020	SDF2	Q99470	ENSG00000132581	6388	9	205090	ENSG00000132581	3	1309	636	30	643
ENST00000247026	NSRP1	Q9H0G5	ENSG00000126653	84081	1	198658	ENSG00000126653	7	2506	1677	28	801
ENST00000247087	AHDC1	Q5TGY3	ENSG00000126705	27245	9	33833	ENSG00000126705	6	6335	4812	598	925
ENST00000247191	DLGAP5	Q15398	ENSG00000126787	9787	1	175018	ENSG00000126787	19	2881	2541	124	216
ENST00000247226	PLEKHG3	A1L390	ENSG00000126822	26030	5	170982	ENSG00000126822	17	10526	3660	320	6546
ENST00000247291	AIF1L	Q9BQI0	ENSG00000126878	83543	1	126531	ENSG00000126878	6	3374	453	99	2822
ENST00000247655	COX7C	P15954	ENSG00000127184	1350	9	84201	ENSG00000127184	3	629	192	115	322
ENST00000247933	IDUA	P35475	ENSG00000127415	3425	6	72650	ENSG00000127415	14	2186	1962	88	136
ENST00000247970	PIN1	Q13526	ENSG00000127445	5300	3	215641	ENSG00000127445	4	997	492	22	483
ENST00000248054	SIN3B	O75182	ENSG00000127511	23309	8	216593	ENSG00000127511	19	5037	3393	21	1623
ENST00000248098	JPT2	Q9H910	ENSG00000206053	90861	1	186024	ENSG00000206053	5	3695	573	34	3088
ENST00000248553	HSPB1	P04792	ENSG00000106211	3315	1	105546	ENSG00000106211	3	777	618	40	119
ENST00000248594	PTPN12	Q05209	ENSG00000127947	5782	1	105616	ENSG00000127947	18	3384	2343	252	789
ENST00000248924	GCAT	O75600	ENSG00000100116	23464	3	238085	ENSG00000100116	9	1497	1260	56	181
ENST00000248929	SGSM3	Q96HU1	ENSG00000100359	27352	8	238332	ENSG00000100359	22	2986	2250	206	530
ENST00000248933	SEZ6L	Q9BYH1	ENSG00000100095	23544	8	237258	ENSG00000100095	17	6584	3075	208	3301
ENST00000248975	YWHAH	Q04917	ENSG00000128245	7533	9	237793	ENSG00000128245	2	1751	741	199	811
ENST00000249042	TST	Q16762	ENSG00000128311	7263	1	240371	ENSG00000128311	3	1125	894	69	162
ENST00000249064	CCDC117	Q8IWD4	ENSG00000159873	150275	5	237406	ENSG00000159873	5	3964	840	155	2969
ENST00000249289	ATP6V1F	Q16864	ENSG00000128524	9296	7	107447	ENSG00000128524	2	678	360	49	269
ENST00000249330	VGF	O15240	ENSG00000128564	7425	9	112028	ENSG00000128564	2	2551	1848	216	487
ENST00000249364	CALU	O43852	ENSG00000128595	813	1	107424	ENSG00000128595	7	5266	948	85	4233
ENST00000249396	SIRT2	Q8IXJ6	ENSG00000068903	22933	8	225187	ENSG00000068903	16	1862	1170	97	595
ENST00000249442	MTX2	O75431	ENSG00000128654	10651	7	47418	ENSG00000128654	10	1341	792	188	361
ENST00000249700	TMOD2	Q9NZR1	ENSG00000128872	29767	9	179033	ENSG00000128872	10	9150	1056	185	7909
ENST00000249736	SLTM	Q9NWH9	ENSG00000137776	79811	8	183215	ENSG00000137776	11	1373	1359	14	0
ENST00000249786	SERF2	P84101	ENSG00000140264	10169	1	178650	ENSG00000140264	3	1537	180	535	822
ENST00000249837	VPS13C	Q709C8	ENSG00000129003	54832	2	183359	ENSG00000129003	83	13300	11133	99	2068
ENST00000249883	AMOTL2	Q9Y2J4	ENSG00000114019	51421	6	70244	ENSG00000114019	10	4488	2343	314	1831
ENST00000250056	PIMREG	Q9BSJ6	ENSG00000129195	54478	1	196929	ENSG00000129195	5	1473	747	83	643
ENST00000250113	FXR2	P51116	ENSG00000129245	9513	8	203852	ENSG00000129245	17	2987	2022	365	600
ENST00000250237	QTRT1	Q9BXR0	ENSG00000213339	81890	5	215771	ENSG00000213339	10	1329	1212	22	95
ENST00000250241	ILF3	Q12906	ENSG00000129351	3609	6	215756	ENSG00000129351	17	3035	2073	69	893
ENST00000250263	ERI1	Q8IV48	ENSG00000104626	90459	1	114143	ENSG00000104626	7	4615	1050	260	3305
ENST00000250416	PARP2	Q9UGN5	ENSG00000129484	10038	5	168968	ENSG00000129484	16	1886	1752	27	107
ENST00000250454	EAPP	Q56P03	ENSG00000129518	55837	5	174445	ENSG00000129518	6	1303	858	73	372
ENST00000250489	PIP4P1	Q86T03	ENSG00000165782	90809	9	173440	ENSG00000165782	7	1961	834	287	840
ENST00000250495	NEDD8	Q15843	ENSG00000129559	4738	9	174135	ENSG00000129559	4	616	246	100	270
ENST00000250559	RAP1B	P61224	ENSG00000127314	5908	3	155752	ENSG00000127314	8	13378	555	171	12652
ENST00000250617	ARHGEF6	Q15052	ENSG00000129675	9459	2	247586	ENSG00000129675	22	4860	2331	50	2479
ENST00000251020	SALL1	Q9NSC2	ENSG00000103449	6299	1	194342	ENSG00000103449	3	5146	3975	34	1137
ENST00000251038	ZC3H14	Q6PJT7	ENSG00000100722	79882	1	171983	ENSG00000100722	17	18153	2211	97	15845
ENST00000251074	NUP37	Q8NFH4	ENSG00000075188	79023	1	163044	ENSG00000075188	9	1203	981	65	157
ENST00000251166	CORO7	P57737	ENSG00000262246	79585	9	192413	ENSG00000262246	28	3472	2778	78	616
ENST00000251241	DHX40	Q8IX18	ENSG00000108406	79665	1	201024	ENSG00000108406	18	3575	2340	62	1173
ENST00000251472	MAST1	Q9Y2H9	ENSG00000105613	22983	9	216109	ENSG00000105613	26	4853	4713	58	82
ENST00000251496	NCAPG	Q9BPX3	ENSG00000109805	64151	1	73416	ENSG00000109805	21	4587	3048	99	1440
ENST00000251507	RABGAP1L	Q5R372	ENSG00000152061	9910	7	29549	ENSG00000152061	21	2899	2448	174	277
ENST00000251527	ESYT2	A0FGR8	ENSG00000117868	57488	5	113906	ENSG00000117868	22	5960	2538	210	3212
ENST00000251636	DHX29	Q7Z478	ENSG00000067248	54505	9	88657	ENSG00000067248	27	4664	4110	121	433
ENST00000251654	PCCB	P05166	ENSG00000114054	5096	1	63010	ENSG00000114054	15	1799	1620	36	143
ENST00000251691	ARFGEF3	Q5TH69	ENSG00000112379	57221	9	96997	ENSG00000112379	34	14859	6534	148	8177
ENST00000251722	USP40	Q9NVE5	ENSG00000085982	55230	1	57850	ENSG00000085982	32	5692	3708	118	1866
ENST00000251739	VPS50	Q96JG6	ENSG00000004766	55610	9	106037	ENSG00000004766	12	1193	984	128	81
ENST00000251775	SNX4	O95219	ENSG00000114520	8723	9	69765	ENSG00000114520	14	2512	1353	30	1129
ENST00000251871	MED17	Q9NVC6	ENSG00000042429	9440	5	143732	ENSG00000042429	12	5087	1956	232	2899
ENST00000251900	SCML2	Q9UQR0	ENSG00000102098	10389	1	245184	ENSG00000102098	15	4162	2103	121	1938
ENST00000251993	KIAA0930	Q6ICG6	ENSG00000100364	23313	9	240974	ENSG00000100364	10	2723	1230	145	1348
ENST00000252102	NDUFA2	O43678	ENSG00000131495	4695	7	91105	ENSG00000131495	3	804	300	202	302
ENST00000252108	UBE4A	Q14139	ENSG00000110344	9354	2	144502	ENSG00000110344	20	6103	3201	131	2771
ENST00000252115	POLDIP3	Q9BY77	ENSG00000100227	84271	2	240859	ENSG00000100227	9	3362	1266	26	2070
ENST00000252268	DPF2	Q92785	ENSG00000133884	5977	1	142079	ENSG00000133884	12	2462	1218	20	1224
ENST00000252445	ELOF1	P60002	ENSG00000130165	84337	9	222938	ENSG00000130165	4	1019	252	64	703
ENST00000252457	CDC16	Q13042	ENSG00000130177	8881	2	166924	ENSG00000130177	19	2034	1860	24	150
ENST00000252458	CDC16	Q13042	ENSG00000130177	8881	2	166926	ENSG00000130177	17	1991	1428	283	280
ENST00000252486	APOE	P02649	ENSG00000130203	348	4	219258	ENSG00000130203	4	1166	954	69	143
ENST00000252487	TOMM40	O96008	ENSG00000130204	10452	3	219251	ENSG00000130204	10	1707	1086	101	520
ENST00000252527	INF2	Q27J81	ENSG00000203485	64423	6	173160	ENSG00000203485	17	3050	2154	0	896
ENST00000252595	SLC27A1	Q6PCB7	ENSG00000130304	376497	6	216759	ENSG00000130304	12	3514	1941	17	1556
ENST00000252602	MRPL34	Q9BQ48	ENSG00000130312	64981	7	216689	ENSG00000130312	2	968	279	225	464
ENST00000252711	NDUFA10	O95299	ENSG00000130414	4705	7	58032	ENSG00000130414	10	4855	1068	41	3746
ENST00000252804	PXDN	Q92626	ENSG00000130508	7837	4	50313	ENSG00000130508	23	6817	4440	60	2317
ENST00000252854	OLFM1	Q99784	ENSG00000130558	10439	7	126739	ENSG00000130558	6	2591	1404	187	1000
ENST00000252891	NUMBL	Q9Y6R0	ENSG00000105245	9253	6	225408	ENSG00000105245	10	3561	1830	168	1563
ENST00000252934	ATXN10	Q9UBB4	ENSG00000130638	25814	7	238683	ENSG00000130638	12	3294	1428	230	1636
ENST00000253023	UBE2M	P61081	ENSG00000130725	9040	9	228005	ENSG00000130725	6	1159	552	230	377
ENST00000253024	TRIM28	Q13263	ENSG00000130726	10155	3	221342	ENSG00000130726	17	3364	2508	694	162
ENST00000253083	HIP1R	O75146	ENSG00000130787	9026	8	157793	ENSG00000130787	32	4509	3207	94	1208
ENST00000253108	EIF3G	O75821	ENSG00000130811	8666	1	222646	ENSG00000130811	11	1103	963	40	100
ENST00000253247	NOL11	Q9H8H0	ENSG00000130935	25926	3	201447	ENSG00000130935	18	2844	2160	12	672
ENST00000253251	UBE4B	O95155	ENSG00000130939	10277	4	22492	ENSG00000130939	27	4772	3522	839	411
ENST00000253329	PPIL4	Q8WUA2	ENSG00000131013	85313	3	102477	ENSG00000131013	13	2475	1479	38	958
ENST00000253332	AKAP12	Q02952	ENSG00000131016	9590	3	97332	ENSG00000131016	4	6597	5349	189	1059
ENST00000253408	GFAP	P14136	ENSG00000131095	2670	2	206833	ENSG00000131095	10	3135	1419	14	1702
ENST00000253413	ATP6V1E1	P36543	ENSG00000131100	529	9	239065	ENSG00000131100	9	1333	681	114	538
ENST00000253462	GINS2	Q9Y248	ENSG00000131153	51659	1	196091	ENSG00000131153	5	2628	558	56	2014
ENST00000253669	HAUS8	Q9BT25	ENSG00000131351	93323	1	223692	ENSG00000131351	11	1407	1233	30	144
ENST00000253692	TBC1D5	Q92609	ENSG00000131374	9779	1	66165	ENSG00000131374	22	7854	2388	1665	3801
ENST00000253699	RBSN	Q9H1K0	ENSG00000131381	64145	8	66054	ENSG00000131381	14	6678	2355	614	3709
ENST00000253754	PDLIM4	P50479	ENSG00000131435	8572	2	85192	ENSG00000131435	7	2257	993	39	1225
ENST00000253788	RPL27	P61353	ENSG00000131469	6155	3	199726	ENSG00000131469	5	505	411	55	39
ENST00000253789	PSMC3IP	Q9P2W1	ENSG00000131470	29893	1	206357	ENSG00000131470	8	1408	618	145	645
ENST00000253811	DIAPH1	O60610	ENSG00000131504	1729	5	91164	ENSG00000131504	28	5789	3687	273	1829
ENST00000253861	EXOC4	Q96A65	ENSG00000131558	60412	9	107621	ENSG00000131558	18	4182	2925	24	1233
ENST00000254029	WDR44	Q5JSH3	ENSG00000131725	54521	9	243772	ENSG00000131725	20	4114	2742	398	974
ENST00000254037	ZCCHC9	Q8N567	ENSG00000131732	84240	1	84118	ENSG00000131732	5	4606	816	3155	635
ENST00000254079	PPP1R1B	Q9UD71	ENSG00000131771	84152	7	199284	ENSG00000131771	7	1815	615	441	759
ENST00000254190	CHSY1	Q86X52	ENSG00000131873	22856	6	185503	ENSG00000131873	3	4662	2409	592	1661
ENST00000254260	RHPN2	Q8IUC4	ENSG00000131941	85415	1	224498	ENSG00000131941	15	3501	2061	36	1404
ENST00000254286	ACTR10	Q9NZ32	ENSG00000131966	55860	9	170624	ENSG00000131966	13	2408	1254	69	1085
ENST00000254301	LGALS3	P17931	ENSG00000131981	3958	2	170509	ENSG00000131981	6	958	753	53	152
ENST00000254322	DNAJB1	P25685	ENSG00000132002	3337	1	223395	ENSG00000132002	3	2242	1023	48	1171
ENST00000254442	WDR7	Q9Y4E6	ENSG00000091157	23335	9	211551	ENSG00000091157	28	14083	4473	211	9399
ENST00000254480	SMARCC1	Q92922	ENSG00000173473	6599	1	67102	ENSG00000173473	28	6354	3318	96	2940
ENST00000254508	NUP210	Q8TEM1	ENSG00000132182	23225	1	66002	ENSG00000132182	40	7206	5664	96	1446
ENST00000254521	HSD17B7	P56937	ENSG00000132196	51478	4	29146	ENSG00000132196	9	1190	1026	55	109
ENST00000254584	ARFIP2	P53365	ENSG00000132254	23647	9	146160	ENSG00000132254	8	2543	1026	84	1433
ENST00000254718	MYBBP1A	Q9BQG0	ENSG00000132382	10514	5	203408	ENSG00000132382	26	4807	3987	307	513
ENST00000254719	RPA1	P27694	ENSG00000132383	6117	1	196583	ENSG00000132383	17	4847	1851	89	2907
ENST00000254759	COQ3	Q9NZJ6	ENSG00000132423	51805	9	101062	ENSG00000132423	7	1325	1110	16	199
ENST00000254770	LANCL2	Q9NS86	ENSG00000132434	55915	7	104840	ENSG00000132434	9	4353	1353	578	2422
ENST00000254799	GRSF1	Q12849	ENSG00000132463	2926	1	78894	ENSG00000132463	10	6610	1443	63	5104
ENST00000254806	WBP2	Q969T9	ENSG00000132471	23558	9	208919	ENSG00000132471	8	1859	786	38	1035
ENST00000254816	TRIM47	Q96LD4	ENSG00000132481	91107	2	208940	ENSG00000132481	6	2269	1917	33	319
ENST00000254878	RIDA	P52758	ENSG00000132541	10247	1	121383	ENSG00000132541	6	987	414	75	498
ENST00000254900	BRD8	Q9H0E9	ENSG00000112983	10902	2	90855	ENSG00000112983	27	4388	3708	372	308
ENST00000254901	REEP2	Q9BRK0	ENSG00000132563	51308	8	85523	ENSG00000132563	8	2099	759	122	1218
ENST00000254942	TERF2	Q15554	ENSG00000132604	7014	9	195243	ENSG00000132604	10	2996	1629	36	1331
ENST00000254976	SNAP25	P60880	ENSG00000132639	6616	9	228394	ENSG00000132639	8	2053	621	211	1221
ENST00000255194	AP3B1	O00203	ENSG00000132842	8546	1	89228	ENSG00000132842	27	5838	3285	176	2377
ENST00000255448	DCLK1	O15075	ENSG00000133083	9201	8	167424	ENSG00000133083	18	5703	2190	212	3301
ENST00000255557	C17orf80	Q9BSJ5	ENSG00000141219	55028	1	201640	ENSG00000141219	5	2163	1644	370	149
ENST00000255764	MED10	Q9BTT4	ENSG00000133398	84246	7	87737	ENSG00000133398	4	1101	408	64	629
ENST00000255977	MKRN1	Q9UHC7	ENSG00000133606	23608	9	113233	ENSG00000133606	8	3094	1449	161	1484
ENST00000256001	ACTR3B	Q9P1U1	ENSG00000133627	57180	6	108586	ENSG00000133627	12	2213	1257	131	825
ENST00000256078	KRAS	P01116	ENSG00000133703	3845	7	159814	ENSG00000133703	6	5430	570	190	4670
ENST00000256079	IPO8	O15397	ENSG00000133704	10526	3	159989	ENSG00000133704	25	5208	3114	222	1872
ENST00000256190	SBF2	Q86WG5	ENSG00000133812	81846	8	146462	ENSG00000133812	40	7439	5550	138	1751
ENST00000256196	RRAS2	P62070	ENSG00000133818	22800	4	146628	ENSG00000133818	6	2343	615	313	1415
ENST00000256319	ERG28	Q9UKR5	ENSG00000133935	11161	7	175863	ENSG00000133935	5	2320	423	133	1764
ENST00000256366	SYNJ2BP	P57105	ENSG00000213463	55333	5	175549	ENSG00000213463	4	7057	438	127	6492
ENST00000256367	TTC9	Q92623	ENSG00000133985	23508	9	171255	ENSG00000133985	3	5094	669	214	4211
ENST00000256413	CTIF	O43310	ENSG00000134030	9811	9	211293	ENSG00000134030	12	5765	1797	310	3658
ENST00000256509	CHL1	O00533	ENSG00000134121	10752	9	58299	ENSG00000134121	28	7856	3675	475	3706
ENST00000256637	SORT1	Q99523	ENSG00000134243	6272	8	36832	ENSG00000134243	20	6990	2496	26	4468
ENST00000256646	NOTCH2	Q04721	ENSG00000134250	4853	1	37322	ENSG00000134250	34	11425	7416	256	3753
ENST00000256707	KIDINS220	Q9ULH0	ENSG00000134313	57498	9	50674	ENSG00000134313	30	7361	5316	182	1863
ENST00000256830	NEDD4L	Q96PU5	ENSG00000049759	23327	6	211586	ENSG00000049759	28	2920	2616	0	304
ENST00000256858	RELCH	Q9P260	ENSG00000134444	57614	8	211743	ENSG00000134444	30	5579	3753	248	1578
ENST00000257017	RAB33A	Q14088	ENSG00000134594	9363	9	243984	ENSG00000134594	2	945	714	101	130
ENST00000257118	PHC2	Q8IXK0	ENSG00000134686	1912	3	34223	ENSG00000134686	14	3870	2577	54	1239
ENST00000257177	TUT4	Q5TAX3	ENSG00000134744	23318	4	35247	ENSG00000134744	30	5853	4938	255	660
ENST00000257209	FHOD3	Q2V2M9	ENSG00000134775	80206	3	211103	ENSG00000134775	25	4967	4320	122	525
ENST00000257245	TIMM10	P62072	ENSG00000134809	26519	6	147964	ENSG00000134809	3	668	273	142	253
ENST00000257247	AHNAK	Q09666	ENSG00000124942	79026	1	148332	ENSG00000124942	6	1024	450	236	338
ENST00000257261	FADS2	O95864	ENSG00000134824	9415	4	141572	ENSG00000134824	12	2964	1269	30	1665
ENST00000257287	CEP135	Q66GS9	ENSG00000174799	9662	1	74218	ENSG00000174799	26	5596	3423	160	2013
ENST00000257430	APC	P25054	ENSG00000134982	324	8	84753	ENSG00000134982	16	10704	8532	59	2113
ENST00000257552	MSI1	O43347	ENSG00000135097	4440	1	163942	ENSG00000135097	15	2959	1089	73	1797
ENST00000257694	PNPLA8	Q9NP80	ENSG00000135241	50640	9	112406	ENSG00000135241	11	4569	2349	236	1984
ENST00000257745	KMT2E	Q8IZD2	ENSG00000005483	55904	8	106740	ENSG00000005483	26	6714	5577	386	751
ENST00000257749	BACH2	Q9BYV9	ENSG00000112182	60468	7	100988	ENSG00000112182	9	9215	2526	809	5880
ENST00000257789	ORC3	Q9UBD5	ENSG00000135336	23595	1	95938	ENSG00000135336	20	2501	2139	34	328
ENST00000257857	CD63	P08962	ENSG00000135404	967	1	161395	ENSG00000135404	8	1070	717	279	74
ENST00000257860	PRPH	P41219	ENSG00000135406	5630	7	154140	ENSG00000135406	9	1800	1413	54	333
ENST00000257904	CDK4	P11802	ENSG00000135446	1019	1	161867	ENSG00000135446	8	1865	912	155	798
ENST00000257915	TFCP2	Q12800	ENSG00000135457	7024	4	160875	ENSG00000135457	15	3807	1509	713	1585
ENST00000258080	HTRA2	O43464	ENSG00000115317	27429	8	44277	ENSG00000115317	8	2370	1377	630	363
ENST00000258098	RAB11FIP5	Q9BXF6	ENSG00000135631	26056	6	53012	ENSG00000135631	5	4342	1962	241	2139
ENST00000258105	MRPL53	Q96EL3	ENSG00000204822	116540	1	53150	ENSG00000204822	3	496	339	20	137
ENST00000258106	EMX1	Q04741	ENSG00000135638	2016	3	44099	ENSG00000135638	3	2144	873	334	937
ENST00000258169	MPHOSPH6	Q99547	ENSG00000135698	10200	4	195959	ENSG00000135698	5	1101	483	49	569
ENST00000258180	KIAA0513	O60268	ENSG00000135709	9764	9	190941	ENSG00000135709	13	7404	1236	273	5895
ENST00000258187	NDRG4	Q9ULP0	ENSG00000103034	65009	7	189491	ENSG00000103034	16	3324	1116	156	2052
ENST00000258198	DYNC1LI2	O43237	ENSG00000135720	1783	6	194861	ENSG00000135720	13	4326	1479	18	2829
ENST00000258243	URB2	Q14146	ENSG00000135763	9816	3	31474	ENSG00000135763	10	5601	4575	123	903
ENST00000258281	TAF5L	O75529	ENSG00000135801	27097	5	41092	ENSG00000135801	5	3112	1770	166	1176
ENST00000258301	STX6	O43752	ENSG00000135823	10228	9	39580	ENSG00000135823	8	4810	768	197	3845
ENST00000258349	RC3H1	Q5TC82	ENSG00000135870	149041	5	39424	ENSG00000135870	19	10988	3402	79	7507
ENST00000258418	CAB39	Q9Y376	ENSG00000135932	51719	9	49351	ENSG00000135932	9	3829	1026	432	2371
ENST00000258449	TGFBRAP1	Q8WUH2	ENSG00000135966	9392	8	54151	ENSG00000135966	12	2827	2583	20	224
ENST00000258455	MRPS9	P82933	ENSG00000135972	64965	3	45261	ENSG00000135972	11	1414	1191	24	199
ENST00000258526	PLXNC1	O60486	ENSG00000136040	10154	2	156423	ENSG00000136040	31	7492	4707	395	2390
ENST00000258530	APPL2	Q8NEU8	ENSG00000136044	55198	2	163165	ENSG00000136044	21	3171	1995	162	1014
ENST00000258607	CKAP2	Q8WWK9	ENSG00000136108	26586	1	165723	ENSG00000136108	9	3614	2049	79	1486
ENST00000258648	MED4	Q9NPJ6	ENSG00000136146	29079	5	167852	ENSG00000136146	7	2254	813	26	1415
ENST00000258662	NUDT15	Q9NV35	ENSG00000136159	55270	5	165460	ENSG00000136159	3	1938	495	21	1422
ENST00000258679	PLEKHA8	Q96JA3	ENSG00000106086	84725	3	104127	ENSG00000106086	13	2293	1323	401	569
ENST00000258682	CAMK2B	Q13554	ENSG00000058404	816	9	110159	ENSG00000058404	20	1652	1554	3	95
ENST00000258729	IGF2BP3	O00425	ENSG00000136231	10643	3	109426	ENSG00000136231	15	4274	1740	381	2153
ENST00000258761	BZW2	Q9Y6E2	ENSG00000136261	28969	7	103670	ENSG00000136261	12	1804	1260	115	429
ENST00000258774	HUS1	O60921	ENSG00000136273	3364	5	110319	ENSG00000136273	8	3007	843	96	2068
ENST00000258821	TTC5	Q8N0Z6	ENSG00000136319	91875	7	173388	ENSG00000136319	10	4737	1323	14	3400
ENST00000258886	IREB2	P48200	ENSG00000136381	3658	5	180323	ENSG00000136381	22	6324	2892	122	3310
ENST00000258963	VEZF1	Q14119	ENSG00000136451	7716	2	207573	ENSG00000136451	5	3948	1022	0	2926
ENST00000258991	TEX2	Q8IWB9	ENSG00000136478	55852	9	208123	ENSG00000136478	12	5232	3405	85	1742
ENST00000259021	KAT7	O95251	ENSG00000136504	11143	2	200436	ENSG00000136504	15	9514	1836	154	7524
ENST00000259037	NDUFB5	O43674	ENSG00000136521	4711	7	64244	ENSG00000136521	6	4199	570	22	3607
ENST00000259075	TANK	Q92844	ENSG00000136560	10010	8	46912	ENSG00000136560	8	2152	1278	205	669
ENST00000259229	CCDC115	Q96NT0	ENSG00000136710	84317	7	54800	ENSG00000136710	5	1769	543	39	1187
ENST00000259238	BIN1	O00499	ENSG00000136717	274	7	54631	ENSG00000136717	16	2338	1494	345	499
ENST00000259335	ECPAS	Q5VYK3	ENSG00000136813	23392	5	129495	ENSG00000136813	51	7391	6054	0	1337
ENST00000259339	TOR1B	O14657	ENSG00000136816	27348	5	126456	ENSG00000136816	5	2738	1011	29	1698
ENST00000259371	DAB2IP	Q5VWQ8	ENSG00000136848	153090	7	125756	ENSG00000136848	17	5469	3399	87	1983
ENST00000259395	ZNF189	O75820	ENSG00000136870	7743	2	125359	ENSG00000136870	4	3115	1755	349	1011
ENST00000259512	DERL1	Q9BUN8	ENSG00000136986	79139	9	122031	ENSG00000136986	8	3213	756	180	2277
ENST00000259569	RANBP6	O60518	ENSG00000137040	26953	9	127310	ENSG00000137040	1	4600	3318	17	1265
ENST00000259632	DCTN3	O75935	ENSG00000137100	11258	9	127879	ENSG00000137100	7	828	561	31	236
ENST00000259667	HINT2	Q9BX68	ENSG00000137133	84681	4	128036	ENSG00000137133	5	649	492	63	94
ENST00000259708	KLC4	Q9NSK0	ENSG00000137171	89953	5	95000	ENSG00000137171	16	2688	1914	353	421
ENST00000259746	TMEM63B	Q5T3F8	ENSG00000137216	55362	9	95160	ENSG00000137216	24	3318	2499	183	636
ENST00000259750	TTBK1	Q5TCY1	ENSG00000146216	84630	8	95052	ENSG00000146216	15	7130	3966	282	2882
ENST00000259751	TJAP1	Q5JTD0	ENSG00000137221	93643	1	95085	ENSG00000137221	10	2720	1644	378	698
ENST00000259808	RIPK1	Q13546	ENSG00000137275	8737	1	92793	ENSG00000137275	11	4092	2016	228	1848
ENST00000259818	TUBB2B	Q9BVA1	ENSG00000137285	347733	9	97989	ENSG00000137285	4	1922	1338	110	474
ENST00000260008	FHDC1	Q9C0D6	ENSG00000137460	85462	8	76462	ENSG00000137460	11	6480	3432	75	2973
ENST00000260045	THAP12	O43422	ENSG00000137492	5612	6	149904	ENSG00000137492	5	3490	2286	296	908
ENST00000260054	CCDC90B	Q9GZT6	ENSG00000137500	60492	9	150154	ENSG00000137500	8	1688	489	382	817
ENST00000260056	RAB30	Q15771	ENSG00000137502	27314	9	150121	ENSG00000137502	5	1393	612	406	375
ENST00000260102	MRPL15	Q9P015	ENSG00000137547	29088	4	115984	ENSG00000137547	5	1729	891	43	795
ENST00000260116	TTPA	P49638	ENSG00000137561	7274	1	120436	ENSG00000137561	5	2633	837	32	1764
ENST00000260118	GGH	Q92820	ENSG00000137563	8836	3	120428	ENSG00000137563	9	1248	957	38	253
ENST00000260130	SDCBP	O00560	ENSG00000137575	6386	2	116122	ENSG00000137575	9	2073	897	58	1118
ENST00000260197	SORL1	Q92673	ENSG00000137642	6653	9	144854	ENSG00000137642	48	10863	6645	18	4200
ENST00000260210	BUD13	Q9BRD0	ENSG00000137656	84811	3	151114	ENSG00000137656	10	2192	1860	23	309
ENST00000260270	FDX1	P10109	ENSG00000137714	2230	1	144086	ENSG00000137714	4	3144	555	173	2416
ENST00000260356	THBS1	P07996	ENSG00000137801	7057	6	178152	ENSG00000137801	22	7789	3513	179	4097
ENST00000260359	NUSAP1	Q9BXS6	ENSG00000137804	51203	1	178375	ENSG00000137804	11	2409	1281	264	864
ENST00000260363	KIF23	Q02241	ENSG00000137807	9493	1	179680	ENSG00000137807	23	3723	2883	220	620
ENST00000260379	RPLP1	P05386	ENSG00000137818	6176	3	179696	ENSG00000137818	4	1174	345	131	698
ENST00000260385	RMDN3	Q96TC7	ENSG00000137824	55177	6	182242	ENSG00000137824	12	3138	1413	1068	657
ENST00000260508	KYAT3	Q6YP21	ENSG00000137944	56267	3	36283	ENSG00000137944	14	1815	1365	46	404
ENST00000260563	RTCA	O00442	ENSG00000137996	8634	9	26637	ENSG00000137996	12	1534	1140	127	267
ENST00000260570	IFT172	Q9UG01	ENSG00000138002	26160	5	51313	ENSG00000138002	48	5395	5250	90	55
ENST00000260585	SELENOI	Q9C0D9	ENSG00000138018	85465	7	42400	ENSG00000138018	10	8066	1194	90	6782
ENST00000260641	ACTR2	P61160	ENSG00000138071	10097	9	43795	ENSG00000138071	9	3861	1185	157	2519
ENST00000260643	PREB	Q9HCU5	ENSG00000138073	10113	9	51215	ENSG00000138073	9	2127	1254	215	658
ENST00000260648	PREPL	Q4J6C6	ENSG00000138078	9581	7	51812	ENSG00000138078	14	3672	2184	959	529
ENST00000260731	KIF11	P52732	ENSG00000138160	3832	1	133424	ENSG00000138160	22	5016	3171	246	1599
ENST00000260733	TACC2	O95359	ENSG00000138162	10579	8	134457	ENSG00000138162	17	3644	3081	81	482
ENST00000260746	ARL3	P36405	ENSG00000138175	403	7	137772	ENSG00000138175	6	3834	549	122	3163
ENST00000260777	SHTN1	A0MZ66	ENSG00000187164	57698	9	138072	ENSG00000187164	16	5308	1716	625	2967
ENST00000260810	TOPBP1	Q92547	ENSG00000163781	11073	1	70205	ENSG00000163781	28	5761	4569	180	1012
ENST00000260818	DNAJC13	O75165	ENSG00000138246	23317	5	62885	ENSG00000138246	56	7754	6732	272	750
ENST00000260926	SATB2	Q9UPW6	ENSG00000119042	23314	6	56621	ENSG00000119042	12	5318	2202	413	2703
ENST00000260970	PPIG	Q13427	ENSG00000138398	9360	3	47119	ENSG00000138398	14	6357	2265	209	3883
ENST00000261023	ITGAV	P06756	ENSG00000138448	3685	2	47736	ENSG00000138448	30	7039	3147	283	3609
ENST00000261169	LMO3	Q8TAP4	ENSG00000048540	55885	7	159584	ENSG00000048540	4	3810	471	490	2849
ENST00000261173	ATP2B1	P20020	ENSG00000070961	490	7	162639	ENSG00000070961	20	6777	3663	181	2933
ENST00000261182	NAP1L1	P55209	ENSG00000187109	4673	1	162380	ENSG00000187109	16	4441	1176	412	2853
ENST00000261183	OSBPL8	Q9BZF1	ENSG00000091039	114882	9	162408	ENSG00000091039	24	7204	2670	442	4092
ENST00000261192	BCAT1	P54687	ENSG00000060982	586	4	159784	ENSG00000060982	11	9314	1161	169	7984
ENST00000261203	LIN7A	O14910	ENSG00000111052	8825	7	162497	ENSG00000111052	7	989	306	58	625
ENST00000261205	SYT1	P21579	ENSG00000067715	6857	9	156127	ENSG00000067715	11	4705	1269	552	2884
ENST00000261210	TMPO	P42166	ENSG00000120802	7112	1	156604	ENSG00000120802	4	820	747	16	57
ENST00000261219	VEZT	Q9HBM0	ENSG00000028203	55591	9	156482	ENSG00000028203	10	3435	1383	0	2052
ENST00000261250	C12orf4	Q9NQ89	ENSG00000047621	57102	8	158662	ENSG00000047621	14	3817	1659	86	2072
ENST00000261304	GALC	P54803	ENSG00000054983	2581	7	176093	ENSG00000054983	17	3794	2058	18	1718
ENST00000261308	PPWD1	Q96BP3	ENSG00000113593	23398	2	83379	ENSG00000113593	11	2109	1941	15	153
ENST00000261313	PEBP1	P30086	ENSG00000089220	5037	9	157484	ENSG00000089220	4	1431	564	86	781
ENST00000261332	ZNF24	P17028	ENSG00000172466	7572	1	213112	ENSG00000172466	4	6256	1107	144	5005
ENST00000261353	YPEL5	P62699	ENSG00000119801	51646	8	42684	ENSG00000119801	3	2136	366	80	1690
ENST00000261367	SNCAIP	Q9Y6H5	ENSG00000064692	9627	2	84992	ENSG00000064692	14	4986	3051	1428	507
ENST00000261368	SNCAIP	Q9Y6H5	ENSG00000064692	9627	2	84995	ENSG00000064692	11	3577	2760	94	723
ENST00000261401	CORO1C	Q9ULV4	ENSG00000110880	23603	6	163267	ENSG00000110880	11	3892	1425	173	2294
ENST00000261427	UBE2K	P61086	ENSG00000078140	3093	9	73845	ENSG00000078140	7	5153	603	192	4358
ENST00000261439	TBC1D1	Q86TI0	ENSG00000065882	23216	1	73743	ENSG00000065882	20	5703	3507	358	1838
ENST00000261443	CSDE1	O75534	ENSG00000009307	7812	9	37170	ENSG00000009307	18	3228	2304	50	874
ENST00000261454	PROX1	Q92786	ENSG00000117707	5629	2	30981	ENSG00000117707	5	8170	2214	288	5668
ENST00000261461	PPP2R5A	Q15172	ENSG00000066027	5525	3	30901	ENSG00000066027	13	3245	1461	701	1083
ENST00000261482	REEP5	Q00765	ENSG00000129625	7905	8	90122	ENSG00000129625	5	683	496	187	0
ENST00000261488	ENOX1	Q8TC92	ENSG00000120658	55068	9	167650	ENSG00000120658	17	2982	1932	578	472
ENST00000261489	TSC22D1	Q15714	ENSG00000102804	8848	9	167677	ENSG00000102804	3	3135	435	217	2483
ENST00000261497	USP22	Q9UPT9	ENSG00000124422	23326	8	204856	ENSG00000124422	13	5189	1578	176	3435
ENST00000261507	MSMO1	Q15800	ENSG00000052802	6307	4	76793	ENSG00000052802	6	2227	882	127	1218
ENST00000261509	PALLD	Q8WX93	ENSG00000129116	23022	1	76818	ENSG00000129116	21	5809	3321	211	2277
ENST00000261537	MIB1	Q86YT6	ENSG00000101752	57534	3	210679	ENSG00000101752	21	9576	3021	264	6291
ENST00000261574	IPO5	O00410	ENSG00000065150	3843	1	166279	ENSG00000065150	29	6001	3348	180	2473
ENST00000261592	NOL4	O94818	ENSG00000101746	8715	9	213077	ENSG00000101746	11	3957	1917	298	1742
ENST00000261596	LPIN2	Q92539	ENSG00000101577	9663	9	212337	ENSG00000101577	20	6229	2691	239	3299
ENST00000261597	NDC80	O14777	ENSG00000080986	10403	1	210044	ENSG00000080986	17	2126	1929	136	61
ENST00000261600	THOC1	Q96FV9	ENSG00000079134	9984	5	212199	ENSG00000079134	21	2108	1974	28	106
ENST00000261636	ARL1	P40616	ENSG00000120805	400	1	162988	ENSG00000120805	6	3197	546	127	2524
ENST00000261637	UTP20	O75691	ENSG00000120800	27340	1	156708	ENSG00000120800	62	9031	8358	178	495
ENST00000261647	TTC19	Q6DKK2	ENSG00000011295	54902	7	197648	ENSG00000011295	10	3050	1143	25	1882
ENST00000261681	MPP5	Q8N3R9	ENSG00000072415	64398	1	171102	ENSG00000072415	15	5468	2028	335	3105
ENST00000261692	CDK2AP1	O14519	ENSG00000111328	8099	3	164264	ENSG00000111328	4	1346	348	238	760
ENST00000261693	SCARB1	Q8WTV0	ENSG00000073060	949	3	164342	ENSG00000073060	13	3405	1530	144	1731
ENST00000261716	TAOK1	Q7L7X3	ENSG00000160551	57551	9	198605	ENSG00000160551	20	12407	3006	519	8882
ENST00000261722	AP3B2	Q13367	ENSG00000103723	8120	9	184720	ENSG00000103723	26	3738	3267	213	258
ENST00000261726	CUX2	O14529	ENSG00000111249	23316	6	157215	ENSG00000111249	22	6703	4461	13	2229
ENST00000261733	ALDH2	P05091	ENSG00000111275	217	6	157254	ENSG00000111275	13	9561	1554	50	7957
ENST00000261741	RBM19	Q9Y4C8	ENSG00000122965	9904	5	163681	ENSG00000122965	24	4148	2883	98	1167
ENST00000261745	NAA25	Q14CX7	ENSG00000111300	80018	5	163568	ENSG00000111300	24	5771	2919	10	2842
ENST00000261755	FAH	P16930	ENSG00000103876	2184	4	180443	ENSG00000103876	15	1471	1260	77	134
ENST00000261758	MESD	Q14696	ENSG00000117899	23184	1	184631	ENSG00000117899	3	4200	705	28	3467
ENST00000261783	ARG2	P78540	ENSG00000081181	384	7	171132	ENSG00000081181	8	1911	1065	58	788
ENST00000261813	PFDN1	O60925	ENSG00000113068	5201	9	91050	ENSG00000113068	4	1336	369	28	939
ENST00000261819	ANAPC5	Q9UJX4	ENSG00000089053	51433	5	164036	ENSG00000089053	17	2574	2268	71	235
ENST00000261822	BCL7A	Q4VC05	ENSG00000110987	605	7	157728	ENSG00000110987	6	2581	633	206	1742
ENST00000261833	CIT	O14578	ENSG00000122966	11113	1	163851	ENSG00000122966	47	8578	6084	53	2441
ENST00000261861	CORO2B	Q9UQ03	ENSG00000103647	10391	8	179637	ENSG00000103647	12	3569	1428	309	1832
ENST00000261875	HACD3	Q9P035	ENSG00000074696	51495	4	179493	ENSG00000074696	11	3228	1089	169	1970
ENST00000261880	AAGAB	Q6PD74	ENSG00000103591	79719	4	183721	ENSG00000103591	10	3132	948	30	2154
ENST00000261889	SNX1	Q13596	ENSG00000028528	6642	2	179427	ENSG00000028528	15	3373	1674	21	1678
ENST00000261897	PRPF40B	Q6NWY9	ENSG00000110844	25766	9	154208	ENSG00000110844	25	3602	2577	551	474
ENST00000261908	NEO1	Q92859	ENSG00000067141	4756	7	179866	ENSG00000067141	29	7108	4386	213	2509
ENST00000261963	MCF2L	O15068	ENSG00000126217	23263	9	166821	ENSG00000126217	9	2419	890	0	1529
ENST00000261965	TUBGCP3	Q96CW5	ENSG00000126216	10426	1	168782	ENSG00000126216	22	3879	2724	173	982
ENST00000262013	SPAG9	O60271	ENSG00000008294	9043	6	207446	ENSG00000008294	30	8276	3966	212	4098
ENST00000262030	ATP5F1B	P06576	ENSG00000110955	506	7	161645	ENSG00000110955	10	1759	1590	21	148
ENST00000262043	PHF3	Q92576	ENSG00000118482	23469	5	95558	ENSG00000118482	16	8233	6120	340	1773
ENST00000262056	EIF4B	P23588	ENSG00000063046	1975	5	154620	ENSG00000063046	15	4148	1836	326	1986
ENST00000262067	TSPAN13	O95857	ENSG00000106537	27075	9	103678	ENSG00000106537	6	1873	615	213	1045
ENST00000262077	NUP153	P49790	ENSG00000124789	9972	1	98392	ENSG00000124789	22	5487	4428	0	1059
ENST00000262097	ASAH1	Q13510	ENSG00000104763	427	9	119106	ENSG00000104763	14	2618	1188	312	1118
ENST00000262105	MCM4	P33991	ENSG00000104738	4173	1	115863	ENSG00000104738	16	4183	2592	209	1382
ENST00000262120	TWSG1	Q9GZX9	ENSG00000128791	57045	1	210351	ENSG00000128791	5	3750	672	185	2893
ENST00000262146	MTFR1	Q15390	ENSG00000066855	9650	5	116275	ENSG00000066855	8	2651	1002	131	1518
ENST00000262173	RNMT	O43148	ENSG00000101654	8731	8	210610	ENSG00000101654	10	6051	1431	44	4576
ENST00000262177	DNAJB6	O75190	ENSG00000105993	10049	9	108699	ENSG00000105993	10	2489	981	167	1341
ENST00000262189	KMT2C	Q8NEZ4	ENSG00000055609	58508	2	113700	ENSG00000055609	59	16860	14736	217	1907
ENST00000262198	ADNP2	Q6IQ32	ENSG00000101544	22850	4	212175	ENSG00000101544	4	5157	3396	224	1537
ENST00000262233	EML1	O00423	ENSG00000066629	2009	7	172521	ENSG00000066629	22	4535	2448	139	1948
ENST00000262241	RCOR1	Q9UKL0	ENSG00000089902	23186	6	172952	ENSG00000089902	12	5751	1458	238	4055
ENST00000262315	CHTF18	Q8WVB6	ENSG00000127586	63922	1	185899	ENSG00000127586	22	3092	2928	65	99
ENST00000262319	TELO2	Q9Y4R8	ENSG00000100726	9894	5	185999	ENSG00000100726	21	3314	2514	282	518
ENST00000262367	CREBBP	Q92793	ENSG00000005339	1387	5	192342	ENSG00000005339	31	10803	7329	810	2664
ENST00000262383	ZNF423	Q2M1K9	ENSG00000102935	23090	4	194303	ENSG00000102935	8	4578	3855	53	670
ENST00000262410	MAPT	P10636	ENSG00000186868	4137	9	200013	ENSG00000186868	14	6762	2277	322	4163
ENST00000262428	COTL1	Q14019	ENSG00000103187	23406	9	196067	ENSG00000103187	4	1842	429	164	1249
ENST00000262430	MLYCD	O95822	ENSG00000103150	23417	9	190840	ENSG00000103150	5	13054	1482	30	11542
ENST00000262460	GINS1	Q14691	ENSG00000101003	9837	1	228821	ENSG00000101003	7	3311	591	148	2572
ENST00000262493	GNAO1	P09471	ENSG00000087258	2775	9	189092	ENSG00000087258	9	3182	1065	747	1370
ENST00000262494	GNAO1	P09471	ENSG00000087258	2775	9	189095	ENSG00000087258	8	5767	1065	453	4249
ENST00000262544	SEC23B	Q15437	ENSG00000101310	10483	6	228567	ENSG00000101310	20	3176	2304	490	382
ENST00000262554	SPTLC1	O15269	ENSG00000090054	10558	1	128923	ENSG00000090054	15	2783	1422	43	1318
ENST00000262605	TTPAL	Q9BTX7	ENSG00000124120	79183	5	229634	ENSG00000124120	5	6224	1029	133	5062
ENST00000262608	CECR2	Q9BXF3	ENSG00000099954	27443	5	236438	ENSG00000099954	19	4783	3906	385	492
ENST00000262613	SLC9A3R1	O14745	ENSG00000109062	9368	1	201743	ENSG00000109062	6	1993	1077	219	697
ENST00000262640	VAMP7	P51809	ENSG00000124333	6845	8	244805	ENSG00000124333	7	2496	783	83	1630
ENST00000262646	RAB2A	P61019	ENSG00000104388	5862	9	116157	ENSG00000104388	8	3735	639	221	2875
ENST00000262662	CDKN2C	P42773	ENSG00000123080	1031	1	25155	ENSG00000123080	4	2904	507	2034	363
ENST00000262719	PHLPP1	O60346	ENSG00000081913	23239	1	211779	ENSG00000081913	17	6299	5154	143	1002
ENST00000262722	FBLN1	P23142	ENSG00000077942	2192	1	238667	ENSG00000077942	15	2251	2052	103	96
ENST00000262746	PRDX1	Q06830	ENSG00000117450	5052	6	34934	ENSG00000117450	6	1234	600	341	293
ENST00000262768	TIMP2	P16035	ENSG00000035862	7077	9	209305	ENSG00000035862	5	3652	663	299	2690
ENST00000262776	LGALS3BP	Q08380	ENSG00000108679	3959	1	209314	ENSG00000108679	6	2202	1758	123	321
ENST00000262795	SHANK3	Q9BYB0	ENSG00000251322	85358	9	238962	ENSG00000251322	25	7091	5193	0	1898
ENST00000262836	PAK3	O75914	ENSG00000077264	5063	8	243657	ENSG00000077264	15	2178	1680	27	471
ENST00000262848	PRKX	P51817	ENSG00000183943	5613	8	244896	ENSG00000183943	9	6102	1077	396	4629
ENST00000262850	RRAGB	Q5VZM2	ENSG00000083750	10325	8	242687	ENSG00000083750	11	1573	1125	443	5
ENST00000262861	SIPA1L2	Q9P2F8	ENSG00000116991	57568	7	41186	ENSG00000116991	21	6555	5169	227	1159
ENST00000262878	SAMHD1	Q9Y3Z3	ENSG00000101347	25939	7	232333	ENSG00000101347	15	4334	1776	200	2358
ENST00000262879	RALGAPB	Q86X10	ENSG00000170471	57148	8	229424	ENSG00000170471	30	8633	4485	257	3891
ENST00000262887	XRCC1	P18887	ENSG00000073050	7515	1	225800	ENSG00000073050	17	2802	1902	548	352
ENST00000262890	PAFAH1B3	Q15102	ENSG00000079462	5050	9	225632	ENSG00000079462	5	1003	696	262	45
ENST00000262942	ARPC1A	Q92747	ENSG00000241685	10552	8	106213	ENSG00000241685	10	1582	1113	136	333
ENST00000262949	HMG20B	Q9P0W2	ENSG00000064961	10362	1	214986	ENSG00000064961	8	886	859	27	0
ENST00000262960	DPP9	Q86TI2	ENSG00000142002	91039	2	222033	ENSG00000142002	22	4295	2679	278	1338
ENST00000262963	PTPRS	Q13332	ENSG00000105426	5802	6	222074	ENSG00000105426	28	4766	4506	23	237
ENST00000262965	TCF3	P15923	ENSG00000071564	6929	1	221633	ENSG00000071564	19	4735	1965	355	2415
ENST00000262982	CSE1L	P55060	ENSG00000124207	1434	4	229959	ENSG00000124207	25	3550	2916	123	511
ENST00000262994	GAB1	Q13480	ENSG00000109458	2549	1	76207	ENSG00000109458	10	2648	2085	302	261
ENST00000262995	GAB1	Q13480	ENSG00000109458	2549	1	76206	ENSG00000109458	11	7981	2175	427	5379
ENST00000263035	DHTKD1	Q96HY7	ENSG00000181192	55526	1	131152	ENSG00000181192	17	5173	2760	80	2333
ENST00000263036	OPTN	Q96CV9	ENSG00000123240	10133	9	131190	ENSG00000123240	15	2464	1734	673	57
ENST00000263050	AKAP7	Q9P0M2	ENSG00000118507	9465	6	96730	ENSG00000118507	3	2238	255	174	1809
ENST00000263062	EPC1	Q9H2F5	ENSG00000120616	80314	8	135769	ENSG00000120616	15	2913	2511	270	132
ENST00000263070	WAPL	Q7Z5K2	ENSG00000062650	23063	1	137098	ENSG00000062650	19	5987	1209	2492	2286
ENST00000263092	METTL16	Q86W50	ENSG00000127804	79066	1	203221	ENSG00000127804	10	5740	1689	130	3921
ENST00000263097	CNN2	Q99439	ENSG00000064666	1265	5	214546	ENSG00000064666	7	2149	930	54	1165
ENST00000263102	CCDC6	Q16204	ENSG00000108091	8030	5	136384	ENSG00000108091	9	5727	1425	132	4170
ENST00000263150	WDR37	Q9Y2I8	ENSG00000047056	22884	9	130831	ENSG00000047056	14	5137	1485	624	3028
ENST00000263207	ARVCF	O00192	ENSG00000099889	421	2	239264	ENSG00000099889	20	4056	2889	307	860
ENST00000263233	SYP	P08247	ENSG00000102003	6855	9	245815	ENSG00000102003	7	2498	942	73	1483
ENST00000263238	ACTR3	P61158	ENSG00000115091	10096	9	45679	ENSG00000115091	12	6589	1257	191	5141
ENST00000263239	DDX18	Q9NVP1	ENSG00000088205	8886	5	45715	ENSG00000088205	14	3753	2013	87	1653
ENST00000263246	PACSIN2	Q9UNF0	ENSG00000100266	11252	1	240895	ENSG00000100266	11	3251	1461	206	1584
ENST00000263256	DESI1	Q6ICB0	ENSG00000100418	27351	7	240776	ENSG00000100418	6	3780	507	204	3069
ENST00000263257	NOVA2	Q9UNW9	ENSG00000104967	4858	9	226133	ENSG00000104967	4	8122	1479	514	6129
ENST00000263274	LIG1	P18858	ENSG00000105486	3978	1	226364	ENSG00000105486	28	3125	2760	161	204
ENST00000263276	GYS1	P13807	ENSG00000104812	2997	4	226549	ENSG00000104812	15	3378	2022	198	1158
ENST00000263280	STRN4	Q9NRL3	ENSG00000090372	29888	9	226212	ENSG00000090372	18	3176	2262	20	894
ENST00000263309	CLNS1A	P54105	ENSG00000074201	1207	1	149963	ENSG00000074201	6	1172	612	37	523
ENST00000263354	NAPA	P54920	ENSG00000105402	8775	9	226297	ENSG00000105402	11	1662	888	123	651
ENST00000263367	HNRNPUL1	Q9BUJ2	ENSG00000105323	11100	2	218882	ENSG00000105323	15	2952	2304	194	454
ENST00000263377	BRD4	O60885	ENSG00000141867	23476	1	223485	ENSG00000141867	20	7169	4089	222	2858
ENST00000263381	WIZ	O95785	ENSG00000011451	58525	5	223524	ENSG00000011451	8	5695	2385	214	3096
ENST00000263384	FAM32A	Q9Y421	ENSG00000105058	26017	6	216541	ENSG00000105058	4	1463	339	33	1091
ENST00000263441	DNAJC6	O75061	ENSG00000116675	9829	9	25659	ENSG00000116675	20	5916	2703	369	2844
ENST00000263461	WDR11	Q9BZH6	ENSG00000120008	55717	5	134414	ENSG00000120008	29	4545	3675	59	811
ENST00000263556	P4HA1	P13674	ENSG00000122884	5033	1	136692	ENSG00000122884	15	2844	1605	241	998
ENST00000263563	PALD1	Q9ULE6	ENSG00000107719	27143	1	132646	ENSG00000107719	20	4610	2571	322	1717
ENST00000263578	FOXRED1	Q96CU9	ENSG00000110074	55572	8	145136	ENSG00000110074	11	1951	1461	53	437
ENST00000263593	SIAE	Q9HAT2	ENSG00000110013	54414	8	151691	ENSG00000110013	10	5441	1572	31	3838
ENST00000263629	MTIF2	P46199	ENSG00000085760	4528	6	52114	ENSG00000085760	16	2536	2184	299	53
ENST00000263630	CCDC88A	Q3V6T2	ENSG00000115355	55704	8	52128	ENSG00000115355	32	9699	5532	809	3358
ENST00000263635	TANC1	Q9C0D5	ENSG00000115183	85461	2	46888	ENSG00000115183	27	7501	5586	268	1647
ENST00000263645	CD81	P60033	ENSG00000110651	975	3	138981	ENSG00000110651	8	1520	711	256	553
ENST00000263646	TOLLIP	Q9H0E2	ENSG00000078902	54472	9	145675	ENSG00000078902	6	2283	741	156	1386
ENST00000263650	OSBPL5	Q9H0X9	ENSG00000021762	114879	9	145841	ENSG00000021762	22	3854	2640	116	1098
ENST00000263655	CNRIP1	Q96F85	ENSG00000119865	25927	8	52578	ENSG00000119865	3	1953	495	606	852
ENST00000263672	SPCS2	Q15005	ENSG00000118363	9789	3	143187	ENSG00000118363	5	2691	681	20	1990
ENST00000263681	POLD3	Q15054	ENSG00000077514	10714	1	143163	ENSG00000077514	12	3788	1401	77	2310
ENST00000263710	CLASP1	Q7Z460	ENSG00000074054	23332	9	54588	ENSG00000074054	40	8092	4617	390	3085
ENST00000263713	EPB41L5	Q9HCM4	ENSG00000115109	57669	2	45813	ENSG00000115109	25	6556	2202	142	4212
ENST00000263733	FAM20B	O75063	ENSG00000116199	9917	9	29640	ENSG00000116199	8	5991	1230	338	4423
ENST00000263736	SRBD1	Q8N5C6	ENSG00000068784	55133	1	51837	ENSG00000068784	21	3667	2988	49	630
ENST00000263774	NDUFS3	O75489	ENSG00000213619	4722	9	140923	ENSG00000213619	7	894	795	18	81
ENST00000263780	CHMP2B	Q9UQN3	ENSG00000083937	25978	5	61582	ENSG00000083937	6	2590	642	214	1734
ENST00000263791	EIF2AK4	Q9P2K8	ENSG00000128829	440275	4	178163	ENSG00000128829	39	5538	4950	81	507
ENST00000263795	WDR76	Q9H967	ENSG00000092470	79968	1	178672	ENSG00000092470	13	3932	1881	31	2020
ENST00000263801	TP53BP1	Q12888	ENSG00000067369	7158	7	182469	ENSG00000067369	28	6346	5919	253	174
ENST00000263812	SLC25A12	O75746	ENSG00000115840	8604	9	55880	ENSG00000115840	17	2429	264	9	2156
ENST00000263826	AKT3	Q9Y243	ENSG00000117020	10000	9	41470	ENSG00000117020	13	7081	1440	112	5529
ENST00000263847	OSBP	P22059	ENSG00000110048	5007	6	148076	ENSG00000110048	14	4713	2424	110	2179
ENST00000263849	ZC2HC1A	Q96GY0	ENSG00000104427	51101	8	116582	ENSG00000104427	9	3310	978	60	2272
ENST00000263856	CHMP3	Q9Y3E7	ENSG00000115561	51652	5	53539	ENSG00000115561	6	3138	669	95	2374
ENST00000263867	CAPG	P40121	ENSG00000042493	822	1	53374	ENSG00000042493	10	1250	1047	63	140
ENST00000263897	USE1	Q9NZ43	ENSG00000053501	55850	2	216631	ENSG00000053501	8	845	780	49	16
ENST00000263904	STAM2	O75886	ENSG00000115145	10254	8	55277	ENSG00000115145	14	5472	1578	121	3773
ENST00000263934	KIF1B	O60333	ENSG00000054523	23095	5	22505	ENSG00000054523	47	6816	5313	153	1350
ENST00000263956	GTF3C3	Q9Y5Q9	ENSG00000119041	9330	1	56525	ENSG00000119041	18	4261	2661	72	1528
ENST00000263966	USP13	Q92995	ENSG00000058056	8975	2	64257	ENSG00000058056	21	8038	2592	186	5260
ENST00000263967	PIK3CA	P42336	ENSG00000121879	5290	8	64198	ENSG00000121879	21	9259	3207	323	5729
ENST00000263991	EHBP1	Q8NDI1	ENSG00000115504	23301	9	43674	ENSG00000115504	25	5165	3696	482	987
ENST00000264025	NECTIN1	Q15223	ENSG00000110400	5818	7	151444	ENSG00000110400	6	5956	1554	647	3755
ENST00000264027	SC5D	O75845	ENSG00000109929	6309	7	144850	ENSG00000109929	5	6854	900	56	5898
ENST00000264039	GPC1	P35052	ENSG00000063660	2817	1	49926	ENSG00000063660	9	3719	1677	256	1786
ENST00000264059	EFHD1	Q9BUP0	ENSG00000115468	80303	1	49529	ENSG00000115468	4	1878	720	101	1057
ENST00000264065	DNAJC10	Q8IXB1	ENSG00000077232	54431	3	47679	ENSG00000077232	24	20144	2382	430	17332
ENST00000264071	TUBB4A	P04350	ENSG00000104833	10382	9	222289	ENSG00000104833	4	2277	1335	97	845
ENST00000264107	ITGA6	P23229	ENSG00000091409	3655	1	47301	ENSG00000091409	26	5618	3222	234	2162
ENST00000264108	HAT1	O14929	ENSG00000128708	8520	1	47273	ENSG00000128708	11	1634	1260	40	334
ENST00000264110	ATF2	P15336	ENSG00000115966	1386	8	56030	ENSG00000115966	14	4164	1518	296	2350
ENST00000264128	SLC25A24	Q6NUK1	ENSG00000085491	29957	6	36759	ENSG00000085491	9	3320	333	141	2846
ENST00000264156	MCM6	Q14566	ENSG00000076003	4175	1	54961	ENSG00000076003	17	3753	2466	78	1209
ENST00000264157	CCNT2	O60583	ENSG00000082258	905	5	46247	ENSG00000082258	9	6920	2193	33	4694
ENST00000264167	AGPS	O00116	ENSG00000018510	8540	4	47442	ENSG00000018510	20	7649	1977	33	5639
ENST00000264169	ORC4	O43929	ENSG00000115947	5000	5	55115	ENSG00000115947	14	6598	1311	174	5113
ENST00000264220	PPAT	Q06203	ENSG00000128059	5471	3	78666	ENSG00000128059	11	3682	1554	138	1990
ENST00000264221	PAICS	P22234	ENSG00000128050	10606	1	74237	ENSG00000128050	10	3339	1278	231	1830
ENST00000264235	GSK3B	P49841	ENSG00000082701	2932	9	69498	ENSG00000082701	11	7711	1263	983	5465
ENST00000264263	GFM1	Q96RP9	ENSG00000168827	85476	7	63775	ENSG00000168827	19	3453	2313	38	1102
ENST00000264276	ALS2	Q96Q42	ENSG00000003393	57679	9	56834	ENSG00000003393	34	6675	4974	117	1584
ENST00000264279	NOP58	Q9Y2X3	ENSG00000055044	51602	5	48271	ENSG00000055044	15	1994	1590	179	225
ENST00000264312	OCIAD1	Q9NX40	ENSG00000109180	54940	9	74042	ENSG00000109180	9	1414	738	190	486
ENST00000264331	TOP2B	Q02880	ENSG00000077097	7155	9	66310	ENSG00000077097	36	5358	4881	75	402
ENST00000264344	FAM13A	O94988	ENSG00000138640	10144	6	79637	ENSG00000138640	24	5866	3072	221	2573
ENST00000264366	ANK2	Q01484	ENSG00000145362	287	8	75618	ENSG00000145362	45	11775	11775	0	0
ENST00000264381	BCHE	P06276	ENSG00000114200	590	1	71188	ENSG00000114200	4	2405	1809	118	478
ENST00000264424	GUCY1B1	Q02153	ENSG00000061918	2983	7	76602	ENSG00000061918	14	3124	1860	82	1182
ENST00000264426	GRIA2	P42262	ENSG00000120251	2891	8	76637	ENSG00000120251	16	3445	2652	279	514
ENST00000264431	RAPGEF2	Q9Y4G8	ENSG00000109756	9693	9	76715	ENSG00000109756	24	6949	4500	419	2030
ENST00000264433	FNIP2	Q9P278	ENSG00000052795	57600	7	76699	ENSG00000052795	17	7038	3345	187	3506
ENST00000264436	ADD2	P35612	ENSG00000075340	119	9	52935	ENSG00000075340	16	9290	2181	468	6641
ENST00000264447	ZNF638	Q14966	ENSG00000075292	27332	7	44059	ENSG00000075292	28	6487	5937	296	254
ENST00000264449	ATP8A1	Q9Y2Q0	ENSG00000124406	10396	7	78386	ENSG00000124406	36	8209	3450	220	4539
ENST00000264451	SLC30A9	Q6PML9	ENSG00000014824	10463	9	73956	ENSG00000014824	18	6164	1707	122	4335
ENST00000264498	FGF2	P09038	ENSG00000138685	2247	1	75838	ENSG00000138685	3	6775	867	68	5840
ENST00000264501	KIAA1109	Q2LD37	ENSG00000138688	84162	8	75807	ENSG00000138688	86	15896	15018	373	505
ENST00000264546	FRMD4A	Q9P2Q2	ENSG00000151474	55691	6	135302	ENSG00000151474	17	2145	1575	570	0
ENST00000264552	UBE2S	Q16763	ENSG00000108106	27338	1	227691	ENSG00000108106	4	2559	669	199	1691
ENST00000264560	PALM	O75781	ENSG00000099864	5064	8	214469	ENSG00000099864	8	2755	1032	208	1515
ENST00000264572	RAP1GDS1	P52306	ENSG00000138698	5910	9	75177	ENSG00000138698	13	1686	1551	135	0
ENST00000264595	AGA	P20933	ENSG00000038002	175	6	81538	ENSG00000038002	9	2037	1041	62	934
ENST00000264637	THRA	P10827	ENSG00000126351	7067	9	199392	ENSG00000126351	10	2538	1473	580	485
ENST00000264640	SMARCE1	Q969G3	ENSG00000073584	6605	1	206042	ENSG00000073584	12	2997	1092	103	1802
ENST00000264645	CASC3	O15234	ENSG00000108349	22794	5	199411	ENSG00000108349	14	3890	2112	12	1766
ENST00000264649	ATP6V0A1	Q93050	ENSG00000033627	535	9	199578	ENSG00000033627	21	4110	2517	131	1462
ENST00000264657	STAT3	P40763	ENSG00000168610	6774	2	206339	ENSG00000168610	24	5047	2313	313	2421
ENST00000264663	NNT	Q13423	ENSG00000112992	23530	9	82995	ENSG00000112992	22	6483	3261	221	3001
ENST00000264670	NSUN2	Q08J23	ENSG00000037474	54888	6	87741	ENSG00000037474	19	3056	2304	65	687
ENST00000264689	UFSP2	Q9NUQ7	ENSG00000109775	55325	1	81721	ENSG00000109775	12	2361	1410	96	855
ENST00000264705	CAD	P27708	ENSG00000084774	790	1	42494	ENSG00000084774	44	7286	6678	183	425
ENST00000264709	DNMT3A	Q9Y6K1	ENSG00000119772	1788	4	51091	ENSG00000119772	23	9501	2739	338	6424
ENST00000264710	RAB10	P61026	ENSG00000084733	10890	8	42376	ENSG00000084733	6	3561	603	525	2433
ENST00000264750	MAEA	Q7L5Y9	ENSG00000090316	10296	6	72688	ENSG00000090316	8	2058	1068	23	967
ENST00000264758	ADD1	P35611	ENSG00000087274	118	6	72853	ENSG00000087274	15	4045	2307	188	1550
ENST00000264773	KCNN2	Q9H2S1	ENSG00000080709	3781	7	84797	ENSG00000080709	8	2512	1740	457	315
ENST00000264883	NUP54	Q7Z3B4	ENSG00000138750	53371	5	79044	ENSG00000138750	12	2249	1524	23	702
ENST00000264896	SCARB2	Q14108	ENSG00000138760	950	8	79060	ENSG00000138760	12	4694	1437	281	2976
ENST00000264934	MTMR12	Q9C0I1	ENSG00000150712	54545	5	88140	ENSG00000150712	14	2215	1914	131	170
ENST00000264954	GRPEL1	Q9HAV7	ENSG00000109519	80273	6	77737	ENSG00000109519	4	2653	654	32	1967
ENST00000264977	PPP2R3A	Q06190	ENSG00000073711	5523	5	63003	ENSG00000073711	14	6743	3453	562	2728
ENST00000265000	GALNT7	Q86SF2	ENSG00000109586	51809	1	76889	ENSG00000109586	12	4249	1974	25	2250
ENST00000265056	MCM2	P49736	ENSG00000073111	4171	1	62632	ENSG00000073111	16	3434	2715	56	663
ENST00000265062	RAB7A	P51149	ENSG00000075785	7879	9	62684	ENSG00000075785	6	2244	624	246	1374
ENST00000265070	GOLPH3	Q9H4A6	ENSG00000113384	64083	9	88135	ENSG00000113384	4	2678	897	285	1496
ENST00000265073	SUB1	P53999	ENSG00000113387	10923	6	82636	ENSG00000113387	5	3449	384	70	2995
ENST00000265074	NPR3	P17342	ENSG00000113389	4883	9	82651	ENSG00000113389	8	7457	1626	456	5375
ENST00000265077	VCAN	P13611	ENSG00000038427	1462	6	84161	ENSG00000038427	15	12345	10191	286	1868
ENST00000265085	CPEB4	Q17RY0	ENSG00000113742	80315	9	86981	ENSG00000113742	10	9418	2190	1385	5843
ENST00000265097	THOC3	Q96J01	ENSG00000051596	84321	4	92075	ENSG00000051596	6	1589	1056	91	442
ENST00000265104	DNAH5	Q8TE73	ENSG00000039139	1767	9	87875	ENSG00000039139	79	15633	13875	105	1653
ENST00000265109	RAI14	Q9P0K7	ENSG00000039560	26064	3	82686	ENSG00000039560	18	4986	2943	196	1847
ENST00000265113	SLC1A3	P43003	ENSG00000079215	6507	1	82785	ENSG00000079215	10	3919	1629	225	2065
ENST00000265164	CASP6	P55212	ENSG00000138794	839	1	80124	ENSG00000138794	7	1634	882	50	702
ENST00000265174	PAPSS1	O43252	ENSG00000138801	9061	9	80047	ENSG00000138801	12	2513	1875	55	583
ENST00000265260	PCNP	Q8WW12	ENSG00000081154	57092	2	61845	ENSG00000081154	5	2285	537	36	1712
ENST00000265271	RBM27	Q9P2N5	ENSG00000091009	54439	1	86082	ENSG00000091009	21	6537	3183	161	3193
ENST00000265272	JAKMIP2	Q96AA8	ENSG00000176049	9832	7	91375	ENSG00000176049	21	6001	2433	468	3100
ENST00000265277	SHOC2	Q9UQ13	ENSG00000108061	8036	9	134112	ENSG00000108061	7	3691	1611	234	1846
ENST00000265295	SPDL1	Q96EA4	ENSG00000040275	54908	1	86794	ENSG00000040275	12	2529	1818	140	571
ENST00000265304	SSBP1	Q04837	ENSG00000106028	6742	7	107910	ENSG00000106028	7	677	447	96	134
ENST00000265316	ABCB6	Q9NP58	ENSG00000115657	10058	5	57390	ENSG00000115657	19	2980	2529	285	166
ENST00000265333	VDAC1	P21796	ENSG00000213585	7416	7	90675	ENSG00000213585	9	1839	852	87	900
ENST00000265343	AFF4	Q9UHB7	ENSG00000072364	27125	8	90638	ENSG00000072364	21	9536	3492	380	5664
ENST00000265348	CUL7	Q14999	ENSG00000044090	9820	4	99933	ENSG00000044090	26	5254	5097	86	71
ENST00000265381	APBA1	Q02410	ENSG00000107282	320	9	128448	ENSG00000107282	13	6597	2514	288	3795
ENST00000265421	POLB	P06746	ENSG00000070501	5423	8	115598	ENSG00000070501	14	1290	1008	131	151
ENST00000265431	CALB1	P05937	ENSG00000104327	793	4	121126	ENSG00000104327	11	2533	786	182	1565
ENST00000265433	NBN	O60934	ENSG00000104320	4683	1	121114	ENSG00000104320	16	4666	2265	155	2246
ENST00000265447	ANXA11	P50995	ENSG00000122359	311	1	137036	ENSG00000122359	15	2526	1419	378	729
ENST00000265459	NRXN2	Q9P2S2	ENSG00000110076	9379	9	148695	ENSG00000110076	23	6621	5139	462	1020
ENST00000265462	PRDX5	P30044	ENSG00000126432	25824	9	141889	ENSG00000126432	6	860	645	95	120
ENST00000265465	POLA2	Q14181	ENSG00000014138	23649	1	142067	ENSG00000014138	18	3544	1797	331	1416
ENST00000265517	MTTP	P55157	ENSG00000138823	4547	1	75237	ENSG00000138823	18	4037	2685	203	1149
ENST00000265523	BLVRA	P53004	ENSG00000106605	644	6	104549	ENSG00000106605	8	1074	891	76	107
ENST00000265560	USP4	Q13107	ENSG00000114316	7375	5	67465	ENSG00000114316	22	4070	2892	29	1149
ENST00000265562	PTPN23	Q9H3S7	ENSG00000076201	25930	9	60305	ENSG00000076201	25	5237	4911	76	250
ENST00000265563	PRKAR2A	P13861	ENSG00000114302	5576	7	67314	ENSG00000114302	11	6492	1215	278	4999
ENST00000265564	EXOSC7	Q15024	ENSG00000075914	23016	4	60170	ENSG00000075914	8	1042	876	34	132
ENST00000265601	WASF1	Q92558	ENSG00000112290	8936	9	101356	ENSG00000112290	6	904	422	482	0
ENST00000265620	GNAS	Q5JWF2	ENSG00000087460	2778	9	230360	ENSG00000087460	12	1866	1140	363	363
ENST00000265636	PPP6R3	Q5H9R7	ENSG00000110075	55291	1	142711	ENSG00000110075	23	4794	2382	277	2135
ENST00000265637	PPP6R3	Q5H9R7	ENSG00000110075	55291	1	142708	ENSG00000110075	22	4783	2484	82	2217
ENST00000265651	FBXO3	Q9UK99	ENSG00000110429	26273	7	147269	ENSG00000110429	11	2403	1416	23	964
ENST00000265717	PRKAR2B	P31323	ENSG00000005249	5577	9	106809	ENSG00000005249	11	3689	1257	203	2229
ENST00000265729	SRI	P30626	ENSG00000075142	6717	1	111319	ENSG00000075142	8	2010	597	53	1360
ENST00000265734	CDK6	Q00534	ENSG00000105810	1021	2	111429	ENSG00000105810	8	11612	981	412	10219
ENST00000265745	VPS41	P49754	ENSG00000006715	27072	6	109964	ENSG00000006715	10	769	630	17	122
ENST00000265753	EIF4H	Q15056	ENSG00000106682	7458	3	105381	ENSG00000106682	7	2679	747	139	1793
ENST00000265800	DMTN	Q08495	ENSG00000158856	2039	7	114644	ENSG00000158856	16	2554	1218	272	1064
ENST00000265806	R3HCC1	Q9Y3T6	ENSG00000104679	203069	7	114837	ENSG00000104679	8	1573	1323	68	182
ENST00000265814	RUNX1T1	Q06455	ENSG00000079102	862	9	121168	ENSG00000079102	12	7284	1815	194	5275
ENST00000265827	ZNF800	Q2TB10	ENSG00000048405	168850	1	112770	ENSG00000048405	6	4473	1995	707	1771
ENST00000265838	ACAT1	P24752	ENSG00000075239	38	9	144015	ENSG00000075239	12	1537	1284	40	213
ENST00000265846	ADAP1	O75689	ENSG00000105963	11033	9	108788	ENSG00000105963	11	2349	1125	203	1021
ENST00000265849	PMS2	P54278	ENSG00000122512	5395	5	109023	ENSG00000122512	15	5093	2589	30	2474
ENST00000265896	SQLE	Q14534	ENSG00000104549	6713	4	117697	ENSG00000104549	11	2962	1725	899	338
ENST00000265963	GTF2H1	P32780	ENSG00000110768	2965	6	139805	ENSG00000110768	15	3012	1647	189	1176
ENST00000265970	PIK3C2A	O00443	ENSG00000011405	5286	1	146743	ENSG00000011405	32	8227	5061	0	3166
ENST00000265986	IDE	P14735	ENSG00000119912	3416	2	137252	ENSG00000119912	25	5894	3060	74	2760
ENST00000266027	GNAI2	P04899	ENSG00000114353	2771	1	60610	ENSG00000114353	9	2169	912	261	996
ENST00000266037	DOCK3	Q8IZD9	ENSG00000088538	1795	8	60673	ENSG00000088538	53	9069	6093	337	2639
ENST00000266039	CACNA2D2	Q9NY47	ENSG00000007402	9254	7	67782	ENSG00000007402	38	5476	3438	174	1864
ENST00000266070	DIDO1	Q9BTC0	ENSG00000101191	11083	6	233248	ENSG00000101191	16	8574	6723	356	1495
ENST00000266079	PRPF6	O94906	ENSG00000101161	24148	8	230767	ENSG00000101161	21	3047	2826	114	107
ENST00000266087	FBXO7	Q9Y3I1	ENSG00000100225	25793	1	237826	ENSG00000100225	9	2060	1569	192	299
ENST00000266095	PISD	Q9UG56	ENSG00000241878	23761	9	240116	ENSG00000241878	9	2655	1128	430	1097
ENST00000266126	EIF2B2	P49770	ENSG00000119718	8892	9	171539	ENSG00000119718	8	4304	1056	70	3178
ENST00000266252	RNF185	Q96GF1	ENSG00000138942	91445	5	237668	ENSG00000138942	5	2946	411	109	2426
ENST00000266269	PATZ1	Q9HBE1	ENSG00000100105	23598	2	240090	ENSG00000100105	5	3895	2064	744	1087
ENST00000266427	ETV6	P41212	ENSG00000139083	2120	1	152995	ENSG00000139083	2	160	151	0	9
ENST00000266458	GABARAPL1	Q9H0R8	ENSG00000139112	23710	7	152933	ENSG00000139112	4	1883	354	253	1276
ENST00000266481	DNM1L	O00429	ENSG00000087470	10059	9	153717	ENSG00000087470	18	3101	2100	61	940
ENST00000266563	PEX5	P50542	ENSG00000139197	5830	8	152668	ENSG00000139197	15	3252	1809	183	1260
ENST00000266564	PEX5	P50542	ENSG00000139197	5830	8	152680	ENSG00000139197	15	3170	1896	17	1257
ENST00000266589	SCAF11	Q99590	ENSG00000139218	9169	1	160315	ENSG00000139218	6	2084	353	1731	0
ENST00000266604	LLPH	Q9BRT6	ENSG00000139233	84298	5	162088	ENSG00000139233	3	7728	390	53	7285
ENST00000266712	TMTC3	Q6ZXV5	ENSG00000139324	160418	1	156274	ENSG00000139324	14	7192	2745	209	4238
ENST00000266732	TMPO	P42166	ENSG00000120802	7112	1	156601	ENSG00000120802	4	3615	2085	238	1292
ENST00000266742	NEDD1	Q8NHV4	ENSG00000139350	121441	1	156533	ENSG00000139350	16	4046	1983	339	1724
ENST00000266775	TDG	Q13569	ENSG00000139372	6996	9	156827	ENSG00000139372	11	1602	1221	279	102
ENST00000266970	CDK2	P24941	ENSG00000123374	1017	1	155054	ENSG00000123374	7	2240	897	179	1164
ENST00000266987	TARBP2	Q15633	ENSG00000139546	6895	9	154773	ENSG00000139546	9	1510	1101	126	283
ENST00000267023	NABP2	Q9BQ15	ENSG00000139579	79035	3	155193	ENSG00000139579	7	1400	636	123	641
ENST00000267113	ESYT1	Q9BSJ8	ENSG00000139641	23344	1	155151	ENSG00000139641	31	3577	3345	53	179
ENST00000267115	TMBIM6	P55061	ENSG00000139644	7009	3	154228	ENSG00000139644	10	2837	714	85	2038
ENST00000267163	RB1	P06400	ENSG00000139687	5925	1	165473	ENSG00000139687	27	4793	2787	187	1819
ENST00000267202	VPS37B	Q9H9H4	ENSG00000139722	79720	2	164196	ENSG00000139722	4	2706	858	62	1786
ENST00000267396	REM2	Q8IYK8	ENSG00000139890	161253	9	169313	ENSG00000139890	5	1858	1023	66	769
ENST00000267484	RTN1	Q16799	ENSG00000139970	6252	8	175178	ENSG00000139970	9	3239	2331	146	762
ENST00000267615	ITPK1	Q13572	ENSG00000100605	3705	7	176370	ENSG00000100605	11	6188	1245	296	4647
ENST00000267811	TCF12	Q99081	ENSG00000140262	6938	5	179124	ENSG00000140262	20	6061	2049	304	3708
ENST00000267814	SORD	Q00796	ENSG00000140263	6652	3	178744	ENSG00000140263	9	4818	1074	89	3655
ENST00000267836	MYEF2	Q9P2K5	ENSG00000104177	50804	6	182727	ENSG00000104177	16	2958	1731	116	1111
ENST00000267935	COMMD4	Q9H0A8	ENSG00000140365	54939	1	180121	ENSG00000140365	8	895	600	27	268
ENST00000267973	WDR61	Q9GZS3	ENSG00000140395	80349	5	184500	ENSG00000140395	11	1202	918	87	197
ENST00000267978	MAN2C1	Q9NTJ4	ENSG00000140400	4123	5	184256	ENSG00000140400	26	3261	3123	24	114
ENST00000267996	TPM1	P09493	ENSG00000140416	7168	9	179341	ENSG00000140416	9	1670	855	72	743
ENST00000268150	MFGE8	Q08431	ENSG00000140545	4240	2	184995	ENSG00000140545	8	1936	1164	60	712
ENST00000268151	MFGE8	Q08431	ENSG00000140545	4240	2	184997	ENSG00000140545	7	1752	1008	62	682
ENST00000268182	IQGAP1	P46940	ENSG00000140575	8826	2	180936	ENSG00000140575	38	7205	4974	100	2131
ENST00000268206	EFL1	Q7Z2Z2	ENSG00000140598	79631	3	184657	ENSG00000140598	20	3643	3363	140	140
ENST00000268220	SEC11A	P67812	ENSG00000140612	23478	3	184858	ENSG00000140612	6	1079	540	64	475
ENST00000268251	ABAT	P80404	ENSG00000183044	18	4	186809	ENSG00000183044	16	4779	1503	136	3140
ENST00000268349	FTO	Q9C0B1	ENSG00000140718	79068	9	189034	ENSG00000140718	3	2799	390	0	2409
ENST00000268379	UQCRC2	P22695	ENSG00000140740	7385	9	187455	ENSG00000140740	14	1914	1362	63	489
ENST00000268482	DHX38	Q92620	ENSG00000140829	9785	6	190466	ENSG00000140829	27	4323	3684	224	415
ENST00000268489	ZFHX3	Q15911	ENSG00000140836	463	7	195511	ENSG00000140836	10	15817	11112	426	4279
ENST00000268605	NOL3	O60936	ENSG00000140939	8996	2	189796	ENSG00000140939	4	1394	627	86	681
ENST00000268668	NDUFB10	O96000	ENSG00000140990	4716	7	186080	ENSG00000140990	4	675	519	87	69
ENST00000268673	PDPK1	O15530	ENSG00000140992	5170	8	186339	ENSG00000140992	11	4728	1290	110	3328
ENST00000268712	NCOR1	O75376	ENSG00000141027	9611	5	204357	ENSG00000141027	46	10705	7323	243	3139
ENST00000268758	PIGS	Q96S52	ENSG00000087111	94005	4	205018	ENSG00000087111	11	2397	126	32	2239
ENST00000268763	KSR1	Q8IVT5	ENSG00000141068	8844	7	198407	ENSG00000141068	22	2806	2541	265	0
ENST00000268797	GFOD2	Q3B7J2	ENSG00000141098	81577	9	195054	ENSG00000141098	3	2018	1158	241	619
ENST00000268942	C17orf80	Q9BSJ5	ENSG00000141219	55028	1	201644	ENSG00000141219	5	3449	1722	194	1533
ENST00000269033	SSH2	Q76I76	ENSG00000141298	85464	8	205274	ENSG00000141298	15	9327	4272	152	4903
ENST00000269095	MPP2	Q14168	ENSG00000108852	4355	7	206625	ENSG00000108852	13	4414	1659	305	2450
ENST00000269122	CLTC	Q00610	ENSG00000141367	1213	6	201035	ENSG00000141367	32	8369	5028	237	3104
ENST00000269137	SS18	Q15532	ENSG00000141380	6760	1	212932	ENSG00000141380	10	1836	1164	332	340
ENST00000269138	SS18	Q15532	ENSG00000141380	6760	1	212931	ENSG00000141380	10	1548	186	29	1333
ENST00000269141	CDH2	P19022	ENSG00000170558	1000	1	212997	ENSG00000170558	16	4016	2721	108	1187
ENST00000269143	AFG3L2	Q9Y4W6	ENSG00000141385	10939	6	212631	ENSG00000141385	17	3247	2394	232	621
ENST00000269187	SLC39A6	Q13433	ENSG00000141424	25800	7	213157	ENSG00000141424	10	3566	2268	236	1062
ENST00000269192	DTNA	Q9Y4J8	ENSG00000134769	1837	7	211009	ENSG00000134769	16	1964	1359	345	260
ENST00000269195	GALNT1	Q10472	ENSG00000141429	2589	4	211057	ENSG00000141429	11	3847	1680	103	2064
ENST00000269209	GAREM1	Q9H706	ENSG00000141441	64762	9	213056	ENSG00000141441	6	7434	2631	454	4349
ENST00000269221	RMC1	Q96DM3	ENSG00000141452	29919	9	210737	ENSG00000141452	20	2200	1974	108	118
ENST00000269243	MYH10	P35580	ENSG00000133026	4628	1	204039	ENSG00000133026	41	7662	5931	139	1592
ENST00000269298	SAT2	Q96F10	ENSG00000141504	112483	8	203860	ENSG00000141504	6	946	513	220	213
ENST00000269321	ARHGDIA	P52565	ENSG00000141522	396	6	209633	ENSG00000141522	6	1837	615	67	1155
ENST00000269361	CSNK1D	P48730	ENSG00000141551	1453	5	209823	ENSG00000141551	8	1088	361	0	727
ENST00000269373	FN3KRP	Q9HA64	ENSG00000141560	79672	2	202831	ENSG00000141560	6	1822	930	50	842
ENST00000269383	TRIM65	Q6PJ69	ENSG00000141569	201292	3	208947	ENSG00000141569	6	3384	1554	14	1816
ENST00000269385	CBX8	Q9HC52	ENSG00000141570	57332	8	209366	ENSG00000141570	5	3752	1170	79	2503
ENST00000269392	CEP131	Q9UPN4	ENSG00000141577	22994	1	209462	ENSG00000141577	26	3673	3252	248	173
ENST00000269397	CBX4	O00257	ENSG00000141582	8535	6	209370	ENSG00000141582	5	2675	1683	189	803
ENST00000269399	CBX2	Q14781	ENSG00000173894	84733	1	202376	ENSG00000173894	4	1061	636	42	383
ENST00000269468	MBD1	Q9UIS9	ENSG00000141644	4152	9	213613	ENSG00000141644	17	3259	1818	437	1004
ENST00000269471	MBD1	Q9UIS9	ENSG00000141644	4152	9	213614	ENSG00000141644	14	2980	1761	437	782
ENST00000269571	ERBB2	P04626	ENSG00000141736	2064	1	199336	ENSG00000141736	27	4545	3768	159	618
ENST00000269701	AKAP8	O43823	ENSG00000105127	10270	2	223498	ENSG00000105127	14	3665	2079	56	1530
ENST00000269886	SH3GL1	Q99961	ENSG00000141985	6455	9	221993	ENSG00000141985	10	2516	1107	179	1230
ENST00000270061	SSBP4	Q9BWG4	ENSG00000130511	170463	7	216930	ENSG00000130511	18	1725	1158	251	316
ENST00000270176	SCYL1	Q96KG9	ENSG00000142186	57410	5	142137	ENSG00000142186	18	2636	2427	71	138
ENST00000270190	DOP1B	Q9Y3R5	ENSG00000142197	9980	9	234241	ENSG00000142197	4	623	435	188	0
ENST00000270225	SAE1	Q9UBE0	ENSG00000142230	10055	3	219559	ENSG00000142230	9	2522	1041	96	1385
ENST00000270238	LMTK3	Q96Q04	ENSG00000142235	114783	9	226450	ENSG00000142235	16	4972	4470	0	502
ENST00000270310	FXYD7	P58549	ENSG00000221946	53822	7	217871	ENSG00000221946	6	712	243	84	385
ENST00000270460	EPN1	Q9Y6I3	ENSG00000063245	29924	9	220892	ENSG00000063245	11	16219	1731	311	14177
ENST00000270530	EVI5L	Q96CN4	ENSG00000142459	115704	8	215436	ENSG00000142459	19	3855	2385	196	1274
ENST00000270583	KLHDC4	Q8TBB5	ENSG00000104731	54758	5	196223	ENSG00000104731	12	1924	1563	96	265
ENST00000270625	RPS11	P62280	ENSG00000142534	6205	3	219912	ENSG00000142534	5	573	477	23	73
ENST00000270722	PRDM16	Q9HAZ2	ENSG00000142611	63976	1	22175	ENSG00000142611	17	8698	3831	57	4810
ENST00000271277	CTTNBP2NL	Q9P2B4	ENSG00000143079	55917	8	27181	ENSG00000143079	6	5864	1920	192	3752
ENST00000271332	CELSR2	Q9HCU4	ENSG00000143126	1952	5	26871	ENSG00000143126	34	11015	8772	541	1702
ENST00000271373	MPC2	O95563	ENSG00000143158	25874	7	39204	ENSG00000143158	6	2223	384	191	1648
ENST00000271411	POU2F1	P14859	ENSG00000143190	5451	2	29283	ENSG00000143190	17	13945	174	8	13763
ENST00000271452	NUF2	Q9BZD4	ENSG00000143228	83540	1	29172	ENSG00000143228	14	1964	1395	279	290
ENST00000271583	TOR1AIP1	Q5JTV8	ENSG00000143337	26092	2	29685	ENSG00000143337	11	3044	1800	206	1038
ENST00000271620	PRUNE1	Q86TP1	ENSG00000143363	58497	9	27978	ENSG00000143363	8	3025	1362	184	1479
ENST00000271640	SETDB1	Q15047	ENSG00000143379	9869	5	27958	ENSG00000143379	22	4437	3876	190	371
ENST00000271715	POGZ	Q7Z3K3	ENSG00000143442	23126	8	37886	ENSG00000143442	19	6655	4233	344	2078
ENST00000271732	GOLPH3L	Q9H4A5	ENSG00000143457	55204	1	37736	ENSG00000143457	5	3124	858	175	2091
ENST00000272091	SDE2	Q6IQ49	ENSG00000143751	163859	2	40894	ENSG00000143751	7	3987	1356	31	2600
ENST00000272102	ARF1	P84077	ENSG00000143761	375	6	31357	ENSG00000143761	5	1840	546	95	1199
ENST00000272163	LBR	Q14739	ENSG00000143815	3930	1	40840	ENSG00000143815	14	3748	1848	99	1801
ENST00000272167	EPHX1	P07099	ENSG00000143819	2052	6	31262	ENSG00000143819	9	1660	1368	80	212
ENST00000272217	ARL8A	Q96BM9	ENSG00000143862	127829	9	40007	ENSG00000143862	7	1789	561	165	1063
ENST00000272227	PDIA6	Q15084	ENSG00000143870	10130	3	50765	ENSG00000143870	13	2338	1323	148	867
ENST00000272233	RHOB	P62745	ENSG00000143878	388	9	42254	ENSG00000143878	1	2367	591	392	1384
ENST00000272249	HNRNPLL	Q8WVV9	ENSG00000143889	92906	6	51619	ENSG00000143889	13	2190	653	0	1537
ENST00000272252	GALM	Q96C23	ENSG00000143891	130589	1	43018	ENSG00000143891	7	2277	1029	48	1200
ENST00000272298	CALM2	P0DP24	ENSG00000143933	805	9	51897	ENSG00000143933	6	1210	450	68	692
ENST00000272317	RPS27A	P62979	ENSG00000143947	6233	3	43469	ENSG00000143947	6	1071	471	324	276
ENST00000272348	SNRPG	P62308	ENSG00000143977	6637	1	52909	ENSG00000143977	4	594	231	91	272
ENST00000272418	MRPS5	P82675	ENSG00000144029	64969	7	53717	ENSG00000144029	12	3298	1293	17	1988
ENST00000272433	SFXN5	Q8TD22	ENSG00000144040	94097	1	52991	ENSG00000144040	14	4140	1023	131	2986
ENST00000272570	ZC3H8	Q8N5P1	ENSG00000144161	84524	5	54424	ENSG00000144161	9	1601	876	106	619
ENST00000272638	UBXN4	Q92575	ENSG00000144224	23190	1	46285	ENSG00000144224	13	3771	1527	75	2169
ENST00000272716	SLC4A10	Q6U841	ENSG00000144290	57282	4	46963	ENSG00000144290	25	3414	3321	93	0
ENST00000272793	UBR3	Q6ZT12	ENSG00000144357	130507	7	47158	ENSG00000144357	39	8005	5667	50	2288
ENST00000272849	NRP2	O60462	ENSG00000118257	8828	7	48407	ENSG00000118257	16	5909	2721	0	3188
ENST00000273038	VGLL4	Q14135	ENSG00000144560	9686	2	65918	ENSG00000144560	6	3725	873	366	2486
ENST00000273047	RAB5A	P20339	ENSG00000144566	5868	6	59215	ENSG00000144566	6	2518	648	518	1352
ENST00000273048	RETREG2	Q8NC44	ENSG00000144567	79137	9	48963	ENSG00000144567	9	2533	537	126	1870
ENST00000273075	DNPEP	Q9ULA0	ENSG00000123992	23549	6	57469	ENSG00000123992	15	2425	1458	221	746
ENST00000273130	DYNC1LI1	Q9Y6G9	ENSG00000144635	51143	8	66456	ENSG00000144635	13	2485	1572	88	825
ENST00000273221	IQSEC1	Q6DN90	ENSG00000144711	9922	4	65993	ENSG00000144711	14	5279	2892	217	2170
ENST00000273223	RPL32	P62910	ENSG00000144713	6161	3	65984	ENSG00000144713	4	567	462	58	47
ENST00000273258	ARL6IP5	O75915	ENSG00000144746	10550	7	61327	ENSG00000144746	3	2134	567	111	1456
ENST00000273317	LIMD1	Q9UGP4	ENSG00000144791	8994	1	60195	ENSG00000144791	8	11442	2031	129	9282
ENST00000273359	ABHD10	Q9NUJ1	ENSG00000144827	55347	7	62080	ENSG00000144827	5	2604	921	36	1647
ENST00000273368	TAGLN3	Q9UI15	ENSG00000144834	29114	9	62084	ENSG00000144834	5	1349	600	417	332
ENST00000273398	ATP6V1A	P38606	ENSG00000114573	523	9	62177	ENSG00000114573	15	4575	1854	92	2629
ENST00000273482	TRPC1	P48995	ENSG00000144935	7220	5	63287	ENSG00000144935	12	4324	2280	391	1653
ENST00000273550	FTH1	P02794	ENSG00000167996	2495	8	148312	ENSG00000167996	4	1203	552	209	442
ENST00000273596	ABHD14A	Q9BUJ0	ENSG00000248487	25864	7	60753	ENSG00000248487	5	1066	816	72	178
ENST00000273853	CENPC	Q03188	ENSG00000145241	1060	1	78780	ENSG00000145241	19	6823	2832	148	3843
ENST00000273854	EPHA5	P54756	ENSG00000145242	2044	7	78766	ENSG00000145242	18	8266	3114	601	4551
ENST00000273860	OCIAD2	Q56VL3	ENSG00000145247	132299	9	78525	ENSG00000145247	6	636	300	193	143
ENST00000273908	SCD5	Q86SK9	ENSG00000145284	79966	9	79232	ENSG00000145284	4	1995	771	235	989
ENST00000273920	ENOPH1	Q9UHY7	ENSG00000145293	58478	8	74856	ENSG00000145293	6	2083	786	240	1057
ENST00000274008	SPATA5	Q8NB90	ENSG00000145375	166378	1	75843	ENSG00000145375	16	8116	2682	65	5369
ENST00000274026	CCNA2	P20248	ENSG00000145386	890	1	80390	ENSG00000145386	8	2748	1299	255	1194
ENST00000274031	SETD7	Q8WTS6	ENSG00000145391	80854	6	80742	ENSG00000145391	8	7365	1101	637	5627
ENST00000274137	NDUFS6	O75380	ENSG00000145494	4726	7	82018	ENSG00000145494	4	1082	375	18	689
ENST00000274203	MYO10	Q9HD67	ENSG00000145555	4651	1	87920	ENSG00000145555	41	11456	6210	468	4778
ENST00000274327	TRIM23	P36406	ENSG00000113595	373	5	88908	ENSG00000113595	13	1829	1641	25	163
ENST00000274364	IQGAP2	Q13576	ENSG00000145703	10788	1	83901	ENSG00000145703	36	5808	4728	261	819
ENST00000274376	RASA1	P20936	ENSG00000145715	5921	6	84214	ENSG00000145715	25	4746	3144	569	1033
ENST00000274458	COMMD10	Q9Y6G5	ENSG00000145781	51397	3	84842	ENSG00000145781	7	1435	609	28	798
ENST00000274473	MEGF10	Q96KG7	ENSG00000145794	84466	1	85111	ENSG00000145794	26	7594	3423	267	3904
ENST00000274695	CDKAL1	Q5VV42	ENSG00000145996	54901	1	93287	ENSG00000145996	16	3272	1740	167	1365
ENST00000274710	PSD2	Q9BQI7	ENSG00000146005	84249	8	85678	ENSG00000146005	15	4526	2316	218	1992
ENST00000274712	ZMAT2	Q96NC0	ENSG00000146007	153527	8	85785	ENSG00000146007	6	1544	600	14	930
ENST00000274849	ABT1	Q9ULW3	ENSG00000146109	29777	3	93610	ENSG00000146109	3	2943	819	30	2094
ENST00000274853	PPP1R18	Q6NYC8	ENSG00000146112	170954	8	98884	ENSG00000146112	3	3349	1842	627	880
ENST00000274891	PRIM2	P49643	ENSG00000146143	5558	1	95500	ENSG00000146143	5	864	477	87	300
ENST00000275034	PHIP	Q8WWQ0	ENSG00000146247	55023	1	100643	ENSG00000146247	40	11926	5466	186	6274
ENST00000275036	HMGN3	Q15651	ENSG00000118418	9324	1	100646	ENSG00000118418	6	831	234	129	468
ENST00000275053	MMS22L	Q6ZRQ5	ENSG00000146263	253714	1	101039	ENSG00000146263	25	8643	3732	266	4645
ENST00000275072	PM20D2	Q8IYS1	ENSG00000146281	135293	1	95957	ENSG00000146281	7	4703	1311	90	3302
ENST00000275162	CLVS2	Q5SYC1	ENSG00000146352	134829	8	96574	ENSG00000146352	6	11219	984	1071	9164
ENST00000275246	TIAM2	Q8IVF5	ENSG00000146426	26230	6	97439	ENSG00000146426	13	2491	1881	511	99
ENST00000275262	QKI	Q96PU8	ENSG00000112531	9444	1	97677	ENSG00000112531	7	6964	978	551	5435
ENST00000275418	ESYT2	A0FGR8	ENSG00000117868	57488	5	113907	ENSG00000117868	23	5902	2601	91	3210
ENST00000275428	GGCT	O75223	ENSG00000006625	79017	1	109690	ENSG00000006625	4	1158	567	120	471
ENST00000275493	EGFR	P00533	ENSG00000146648	1956	2	104827	ENSG00000146648	28	9905	3633	261	6011
ENST00000275517	CDCA5	Q96FF9	ENSG00000146670	113130	1	148856	ENSG00000146670	6	2475	759	62	1654
ENST00000275605	PSPH	P78330	ENSG00000146733	5723	1	110506	ENSG00000146733	8	1974	678	598	698
ENST00000275732	GIGYF1	O75420	ENSG00000146830	64599	2	111989	ENSG00000146830	24	6530	3108	1210	2212
ENST00000275766	ZC3HAV1L	Q96H79	ENSG00000146858	92092	1	113170	ENSG00000146858	5	1766	903	25	838
ENST00000275820	NOM1	Q5C9Z4	ENSG00000146909	64434	5	108675	ENSG00000146909	11	6082	2583	26	3473
ENST00000275988	SPIN2B	Q9BPZ2	ENSG00000186787	474343	7	246136	ENSG00000186787	2	1152	777	204	171
ENST00000276062	NDUFB11	Q9NX14	ENSG00000147123	54539	7	245599	ENSG00000147123	3	948	492	359	97
ENST00000276072	TAF1	P21675	ENSG00000147133	6872	5	242902	ENSG00000147133	38	5692	5682	10	0
ENST00000276079	NONO	Q15233	ENSG00000147140	4841	3	242882	ENSG00000147140	12	2661	1416	153	1092
ENST00000276105	SNX12	Q9UMY4	ENSG00000147164	29934	9	246335	ENSG00000147164	4	720	477	97	146
ENST00000276123	ZNF711	Q9Y462	ENSG00000147180	7552	8	243206	ENSG00000147180	10	2887	2286	508	93
ENST00000276202	DOCK11	Q5JSL3	ENSG00000147251	139818	1	243778	ENSG00000147251	53	6625	6222	63	340
ENST00000276204	DOCK11	Q5JSL3	ENSG00000147251	139818	1	243777	ENSG00000147251	53	6664	6234	74	356
ENST00000276390	ATP6V1B2	P21281	ENSG00000147416	526	9	114569	ENSG00000147416	14	2856	1536	26	1294
ENST00000276480	ST18	O60284	ENSG00000147488	9705	3	120092	ENSG00000147488	26	6187	3144	684	2359
ENST00000276520	TACC1	O75410	ENSG00000147526	6867	5	115409	ENSG00000147526	11	6513	1188	320	5005
ENST00000276533	GINS4	Q9BRT9	ENSG00000147536	84296	1	115521	ENSG00000147536	8	3770	672	155	2943
ENST00000276569	ARMC1	Q9NVT9	ENSG00000104442	55156	9	120474	ENSG00000104442	7	3000	849	215	1936
ENST00000276585	MRPS28	Q9Y2Q9	ENSG00000147586	28957	3	120824	ENSG00000147586	3	838	564	11	263
ENST00000276590	LACTB2	Q53H82	ENSG00000147592	51110	1	120625	ENSG00000147592	7	1526	867	65	594
ENST00000276602	TERF1	P54274	ENSG00000147601	7013	1	116478	ENSG00000147601	9	3268	1260	23	1985
ENST00000276603	TERF1	P54274	ENSG00000147601	7013	1	116479	ENSG00000147601	10	3329	1320	23	1986
ENST00000276689	NDUFB9	Q9Y6M9	ENSG00000147684	4715	7	117603	ENSG00000147684	4	691	540	64	87
ENST00000276692	TATDN1	Q6P1N9	ENSG00000147687	83940	5	122099	ENSG00000147687	12	1029	894	39	96
ENST00000276826	ARHGAP39	Q9C0H5	ENSG00000147799	80728	9	123162	ENSG00000147799	10	4697	3252	202	1243
ENST00000276914	PLIN2	Q99541	ENSG00000147872	123	3	127514	ENSG00000147872	8	1897	1314	96	487
ENST00000277010	SIGMAR1	Q99720	ENSG00000147955	10280	3	127891	ENSG00000147955	4	1672	672	90	910
ENST00000277082	CEP78	Q5JTW2	ENSG00000148019	84131	4	124718	ENSG00000148019	15	2542	2118	119	305
ENST00000277165	FAM120A	Q9NZB2	ENSG00000048828	23196	2	125098	ENSG00000048828	18	5160	3357	231	1572
ENST00000277225	ZNF462	Q96JM2	ENSG00000148143	58499	6	125486	ENSG00000148143	13	10345	7521	220	2604
ENST00000277415	OLFM1	Q99784	ENSG00000130558	10439	7	126738	ENSG00000130558	4	1014	408	285	321
ENST00000277458	ASB6	Q9NWX5	ENSG00000148331	140459	9	130213	ENSG00000148331	6	4603	1266	152	3185
ENST00000277459	ASB6	Q9NWX5	ENSG00000148331	140459	9	130214	ENSG00000148331	5	2180	594	125	1461
ENST00000277462	PTGES2	Q9H7Z7	ENSG00000148334	80142	9	130076	ENSG00000148334	8	1614	561	602	451
ENST00000277537	SEC16A	O15027	ENSG00000148396	9919	6	130570	ENSG00000148396	21	3910	2256	0	1654
ENST00000277632	MINDY3	Q9H8M7	ENSG00000148481	80013	8	135397	ENSG00000148481	15	2364	1338	208	818
ENST00000277865	GLUD1	P00367	ENSG00000148672	2746	3	137119	ENSG00000148672	13	3300	1677	74	1549
ENST00000277895	ABLIM1	O14639	ENSG00000099204	3983	8	138038	ENSG00000099204	23	2657	2337	98	222
ENST00000277982	SORBS1	Q9BX66	ENSG00000095637	10580	6	137352	ENSG00000095637	31	3517	3456	27	34
ENST00000278100	BCCIP	Q9P287	ENSG00000107949	56647	1	134601	ENSG00000107949	7	1234	945	12	277
ENST00000278193	LIN7C	Q9NUP9	ENSG00000148943	55327	8	147027	ENSG00000148943	5	4842	594	17	4231
ENST00000278279	TUT1	Q9H6E5	ENSG00000149016	64852	1	148351	ENSG00000149016	3	533	495	38	0
ENST00000278353	HSD17B12	Q53GQ0	ENSG00000149084	51144	3	140501	ENSG00000149084	11	2396	939	90	1367
ENST00000278379	SLC1A2	P43004	ENSG00000110436	6506	8	147308	ENSG00000110436	11	12006	1725	592	9689
ENST00000278412	SSRP1	Q08945	ENSG00000149136	6749	1	147914	ENSG00000149136	17	2831	2130	282	419
ENST00000278422	TMX2	Q9Y320	ENSG00000213593	51075	5	141151	ENSG00000213593	8	1645	891	26	728
ENST00000278483	HIKESHI	Q53FT3	ENSG00000149196	51501	4	143536	ENSG00000149196	5	1108	594	209	305
ENST00000278505	ENDOD1	O94919	ENSG00000149218	23052	7	143812	ENSG00000149218	2	4651	1503	82	3066
ENST00000278550	TENM4	Q6N022	ENSG00000149256	26011	5	150060	ENSG00000149256	34	14381	8310	842	5229
ENST00000278568	PAK1	Q13153	ENSG00000149269	5058	7	149941	ENSG00000149269	16	2543	1662	530	351
ENST00000278572	RPS3	P23396	ENSG00000149273	6188	3	143227	ENSG00000149273	7	907	780	18	109
ENST00000278618	AASDHPPT	Q9NRN7	ENSG00000149313	60496	7	143984	ENSG00000149313	6	2767	930	49	1788
ENST00000278671	LAMTOR1	Q6IAA8	ENSG00000149357	55004	6	149572	ENSG00000149357	5	1089	486	73	530
ENST00000278823	MTA2	O94776	ENSG00000149480	9219	6	148354	ENSG00000149480	18	3083	2007	415	661
ENST00000278840	FADS2	O95864	ENSG00000134824	9415	4	141579	ENSG00000134824	12	3091	1335	91	1665
ENST00000278849	INCENP	Q9NQS7	ENSG00000149503	3619	1	141598	ENSG00000149503	18	3698	2745	177	776
ENST00000278856	WDR74	Q6RFH5	ENSG00000133316	54663	5	148506	ENSG00000133316	11	1289	1158	91	40
ENST00000278878	PLCH2	O75038	ENSG00000149527	9651	7	22129	ENSG00000149527	19	3781	3718	0	63
ENST00000278893	BSCL2	Q96G97	ENSG00000168000	26580	9	148440	ENSG00000168000	10	1364	864	218	282
ENST00000278916	CHEK1	O14757	ENSG00000149554	1111	1	145086	ENSG00000149554	12	1571	1329	56	186
ENST00000278980	COMMD7	Q86VX2	ENSG00000149600	149951	5	231965	ENSG00000149600	9	1900	603	606	691
ENST00000279034	SOGA1	O94964	ENSG00000149639	140710	8	232323	ENSG00000149639	15	3703	3051	327	325
ENST00000279068	LSM14B	Q9BX40	ENSG00000149657	149986	9	230516	ENSG00000149657	9	2576	1158	192	1226
ENST00000279069	LSM14B	Q9BX40	ENSG00000149657	149986	9	230518	ENSG00000149657	5	811	671	140	0
ENST00000279230	PLCB3	Q01970	ENSG00000149782	5331	1	141844	ENSG00000149782	31	4197	3705	127	365
ENST00000279247	CAPN1	P07384	ENSG00000014216	823	6	142039	ENSG00000014216	22	3007	2145	143	719
ENST00000279263	TM7SF2	O76062	ENSG00000149809	7108	7	141997	ENSG00000149809	10	1744	1257	144	343
ENST00000279270	SCYL1	Q96KG9	ENSG00000142186	57410	5	142142	ENSG00000142186	13	1659	813	209	637
ENST00000279394	TAOK2	Q9UL54	ENSG00000149930	9344	8	188060	ENSG00000149930	19	4246	3150	403	693
ENST00000279451	CNKSR2	Q8WXI2	ENSG00000149970	22866	8	241707	ENSG00000149970	20	4244	2607	442	1195
ENST00000279550	YBX3	P16989	ENSG00000060138	8531	1	159343	ENSG00000060138	9	1708	912	196	600
ENST00000280096	HNMT	P50135	ENSG00000150540	3176	2	46336	ENSG00000150540	2	504	156	19	329
ENST00000280097	HNMT	P50135	ENSG00000150540	3176	2	46337	ENSG00000150540	6	3132	879	19	2234
ENST00000280154	PDCD4	Q53EL6	ENSG00000150593	27250	1	134097	ENSG00000150593	12	3481	1410	153	1918
ENST00000280155	ADRA2A	P08913	ENSG00000150594	150	5	134116	ENSG00000150594	1	3879	1398	968	1513
ENST00000280187	GPM6A	P51674	ENSG00000150625	2823	8	81497	ENSG00000150625	8	2854	837	46	1971
ENST00000280190	WDR17	Q8IZU2	ENSG00000150627	116966	4	77009	ENSG00000150627	31	4705	3969	156	580
ENST00000280241	DLG2	Q15700	ENSG00000150672	1740	9	150169	ENSG00000150672	22	7730	2730	194	4806
ENST00000280285	MTMR12	Q9C0I1	ENSG00000150712	54545	5	88138	ENSG00000150712	15	4966	2082	100	2784
ENST00000280326	CCT5	P48643	ENSG00000150753	22948	7	82237	ENSG00000150753	11	3293	1626	61	1606
ENST00000280333	DOCK1	Q14185	ENSG00000150760	1793	1	134620	ENSG00000150760	52	6797	5598	109	1090
ENST00000280362	PTS	Q03393	ENSG00000150787	5805	8	144208	ENSG00000150787	6	872	438	16	418
ENST00000280377	USP15	Q9Y4E8	ENSG00000135655	9958	9	155530	ENSG00000135655	22	14971	2946	11	12014
ENST00000280699	NGLY1	Q96IV0	ENSG00000151092	55768	1	66327	ENSG00000151092	11	1897	721	0	1176
ENST00000280700	NGLY1	Q96IV0	ENSG00000151092	55768	1	66320	ENSG00000151092	12	2534	1965	53	516
ENST00000280756	TMEM263	Q8WUH6	ENSG00000151135	90488	2	156962	ENSG00000151135	4	3228	351	233	2644
ENST00000280772	ANK3	Q12955	ENSG00000151150	288	7	136390	ENSG00000151150	44	17019	13134	337	3548
ENST00000280800	PLBD2	Q8NHP8	ENSG00000151176	196463	9	157391	ENSG00000151176	12	4787	1770	14	3003
ENST00000280876	GXYLT1	Q4G148	ENSG00000151233	283464	1	160183	ENSG00000151233	7	1937	1230	66	641
ENST00000280886	DIP2C	Q9Y2E4	ENSG00000151240	22982	8	134837	ENSG00000151240	37	7885	4671	90	3124
ENST00000280969	MAT2B	Q9NZL9	ENSG00000038274	27430	1	86690	ENSG00000038274	7	2226	972	281	973
ENST00000280987	FAM177A1	Q8N128	ENSG00000151327	283635	9	169974	ENSG00000151327	5	2927	711	61	2155
ENST00000281031	NDUFC2	O95298	ENSG00000151366	4718	7	150009	ENSG00000151366	3	2168	360	118	1690
ENST00000281038	NARS2	Q96I59	ENSG00000137513	79731	7	150052	ENSG00000137513	14	2512	1434	376	702
ENST00000281156	KHDRBS2	Q5VWX1	ENSG00000112232	202559	7	100375	ENSG00000112232	9	2329	1050	277	1002
ENST00000281171	PTPRO	Q16827	ENSG00000151490	5800	9	153143	ENSG00000151490	27	6128	3651	219	2258
ENST00000281182	ACAD8	Q9UKU7	ENSG00000151498	27034	9	145371	ENSG00000151498	11	2249	1248	106	895
ENST00000281187	VPS26B	Q4G0F5	ENSG00000151502	112936	9	145364	ENSG00000151502	6	3661	1011	452	2198
ENST00000281243	QDPR	P09417	ENSG00000151552	5860	3	77986	ENSG00000151552	7	1507	735	36	736
ENST00000281273	QTRT2	Q9H974	ENSG00000151576	79691	1	62212	ENSG00000151576	10	4023	1248	257	2518
ENST00000281394	PPP1R21	Q6ZMI0	ENSG00000162869	129285	9	43383	ENSG00000162869	21	3137	2310	185	642
ENST00000281405	WDR35	Q9P2L0	ENSG00000118965	57539	1	50911	ENSG00000118965	27	6918	3513	107	3298
ENST00000281419	ASAP2	O43150	ENSG00000151693	8853	4	41939	ENSG00000151693	28	5665	3021	293	2351
ENST00000281453	CENPU	Q71F23	ENSG00000151725	79682	1	81659	ENSG00000151725	13	2494	1257	34	1203
ENST00000281455	ACSL1	P33121	ENSG00000151726	2180	9	81665	ENSG00000151726	21	3712	2097	85	1530
ENST00000281456	SLC25A4	P12235	ENSG00000151729	291	9	77185	ENSG00000151729	4	4415	897	107	3411
ENST00000281741	TXNDC16	Q9P2K2	ENSG00000087301	57544	5	174920	ENSG00000087301	21	4557	2478	371	1708
ENST00000281821	EPHA4	P54764	ENSG00000116106	2043	4	57522	ENSG00000116106	18	6362	2961	56	3345
ENST00000281828	FARSB	Q9NSD9	ENSG00000116120	10056	9	57554	ENSG00000116120	17	6761	1770	19	4972
ENST00000281923	MGAT5	Q09328	ENSG00000152127	4249	9	46235	ENSG00000152127	16	8332	2226	332	5774
ENST00000281928	MED13L	Q71F56	ENSG00000123066	23389	7	163708	ENSG00000123066	31	14615	6633	588	7394
ENST00000282050	ATP5F1A	P25705	ENSG00000152234	498	7	213376	ENSG00000152234	13	1945	1662	145	138
ENST00000282058	HAUS1	Q96CS2	ENSG00000152240	115106	1	211235	ENSG00000152240	9	1072	837	27	208
ENST00000282074	SPC25	Q9HBM1	ENSG00000152253	57405	1	55699	ENSG00000152253	7	1342	675	127	540
ENST00000282077	PDK1	Q15118	ENSG00000152256	5163	4	47312	ENSG00000152256	11	14193	1311	182	12700
ENST00000282120	TGOLN2	O43493	ENSG00000152291	10618	8	53356	ENSG00000152291	5	6419	1440	334	4645
ENST00000282249	GUCY1A2	P33402	ENSG00000152402	2977	7	150773	ENSG00000152402	9	3047	2292	390	365
ENST00000282251	CWF19L2	Q2TBE0	ENSG00000152404	143884	1	150777	ENSG00000152404	18	3278	2685	28	565
ENST00000282260	HOMER1	Q86YM7	ENSG00000152413	9456	9	89272	ENSG00000152413	6	774	675	20	79
ENST00000282268	XRCC4	Q13426	ENSG00000152422	7518	1	84150	ENSG00000152422	8	1696	1005	175	516
ENST00000282272	ANKRD44	Q8N8A2	ENSG00000065413	91526	9	56552	ENSG00000065413	28	6087	2982	176	2929
ENST00000282356	CAMK4	Q16566	ENSG00000152495	814	9	84712	ENSG00000152495	11	11942	1422	100	10420
ENST00000282369	TRIM36	Q9NQ86	ENSG00000152503	55521	8	90141	ENSG00000152503	10	4050	2187	122	1741
ENST00000282388	ZFP36L2	P47974	ENSG00000152518	678	1	51765	ENSG00000152518	2	3693	1485	291	1917
ENST00000282412	PPM1B	O75688	ENSG00000138032	5495	7	43208	ENSG00000138032	6	2608	1440	414	754
ENST00000282441	YAP1	P46937	ENSG00000137693	10413	1	143900	ENSG00000137693	9	5401	1515	402	3484
ENST00000282486	MBNL1	Q9NR56	ENSG00000152601	4154	2	63569	ENSG00000152601	10	6422	1167	1842	3413
ENST00000282488	MBNL1	Q9NR56	ENSG00000152601	4154	2	63570	ENSG00000152601	11	6458	1203	1842	3413
ENST00000282499	GRIA4	P48058	ENSG00000152578	2893	9	143966	ENSG00000152578	17	5506	2709	446	2351
ENST00000282512	NADK2	Q4G0N4	ENSG00000152620	133686	6	88267	ENSG00000152620	12	2507	840	236	1431
ENST00000282516	NIPBL	Q6KC79	ENSG00000164190	25836	5	82799	ENSG00000164190	47	10425	8415	489	1521
ENST00000282541	GPD1L	Q8N335	ENSG00000152642	23171	9	59454	ENSG00000152642	8	4060	1056	201	2803
ENST00000282561	GJA1	P17302	ENSG00000152661	2697	1	96544	ENSG00000152661	2	3083	1149	203	1731
ENST00000282574	TIA1	P31483	ENSG00000116001	7072	5	52888	ENSG00000116001	13	3823	1158	150	2515
ENST00000282753	GRM1	Q13255	ENSG00000152822	2911	4	97181	ENSG00000152822	8	6846	3585	456	2805
ENST00000282841	GGPS1	O95749	ENSG00000152904	9453	9	31632	ENSG00000152904	4	2895	903	232	1760
ENST00000282903	PLOD2	O00469	ENSG00000152952	5352	1	70563	ENSG00000152952	20	3749	2277	195	1277
ENST00000282924	JAKMIP1	Q96N16	ENSG00000152969	152789	9	77704	ENSG00000152969	13	2585	1881	486	218
ENST00000283027	NUBP1	P53384	ENSG00000103274	4682	1	186911	ENSG00000103274	11	1231	963	22	246
ENST00000283131	SMARCA5	O60264	ENSG00000153147	8467	1	76223	ENSG00000153147	24	7684	3159	223	4302
ENST00000283268	FEZF2	Q8TBJ5	ENSG00000153266	55079	4	68252	ENSG00000153266	5	2112	1380	330	402
ENST00000283290	ATG3	Q9NT62	ENSG00000144848	64422	6	69262	ENSG00000144848	12	1568	945	434	189
ENST00000283351	TRAPPC8	Q9Y2L5	ENSG00000153339	22878	8	213033	ENSG00000153339	29	6247	4308	364	1575
ENST00000283365	DTNA	Q9Y4J8	ENSG00000134769	1837	7	210982	ENSG00000134769	22	6522	2061	351	4110
ENST00000283646	RPIA	P49247	ENSG00000153574	22934	6	44675	ENSG00000153574	9	1813	936	26	851
ENST00000283943	TRIP12	Q14669	ENSG00000153827	9320	6	57705	ENSG00000153827	41	9874	5979	179	3716
ENST00000283977	PGM3	O95394	ENSG00000013375	5238	2	100720	ENSG00000013375	12	2223	1326	127	770
ENST00000284006	KCTD15	Q96SI1	ENSG00000153885	79047	2	217691	ENSG00000153885	7	4918	705	252	3961
ENST00000284031	DDAH1	O94760	ENSG00000153904	23576	1	36194	ENSG00000153904	6	3939	858	114	2967
ENST00000284037	ERBIN	Q96RT1	ENSG00000112851	55914	1	83413	ENSG00000112851	26	8647	4239	389	4019
ENST00000284049	CHD1	O14646	ENSG00000153922	1105	1	89896	ENSG00000153922	35	6457	5133	148	1176
ENST00000284061	DGKE	P52429	ENSG00000153933	8526	8	200850	ENSG00000153933	12	8608	1704	128	6776
ENST00000284073	MSI2	Q96DH6	ENSG00000153944	124540	2	200898	ENSG00000153944	14	6379	987	220	5172
ENST00000284116	GDPD1	Q8N9F7	ENSG00000153982	284161	9	201007	ENSG00000153982	10	3241	945	99	2197
ENST00000284202	IMPACT	Q9P2X3	ENSG00000154059	55364	1	210800	ENSG00000154059	11	3734	963	87	2684
ENST00000284240	THY1	P04216	ENSG00000154096	7070	9	151430	ENSG00000154096	4	3556	486	1040	2030
ENST00000284274	OTULIN	Q96BN8	ENSG00000154124	90268	1	82320	ENSG00000154124	7	7969	1059	108	6802
ENST00000284292	NRGN	Q92686	ENSG00000154146	4900	4	144974	ENSG00000154146	4	1210	237	143	830
ENST00000284320	TOMM70	O94826	ENSG00000154174	9868	9	68826	ENSG00000154174	12	4100	1827	140	2133
ENST00000284384	PRKCA	P17252	ENSG00000154229	5578	6	201417	ENSG00000154229	15	2718	451	0	2267
ENST00000284440	UCHL1	P09936	ENSG00000154277	7345	9	73911	ENSG00000154277	9	1103	672	49	382
ENST00000284483	TNIK	Q9UKE5	ENSG00000154310	23043	9	71359	ENSG00000154310	32	4059	4059	0	0
ENST00000284563	ENAH	Q8N8S7	ENSG00000154380	55740	1	40865	ENSG00000154380	6	665	639	26	0
ENST00000284637	SH3RF1	Q7Z6J0	ENSG00000154447	57630	1	81360	ENSG00000154447	12	5120	2667	193	2260
ENST00000284767	PDLIM3	Q53GG5	ENSG00000154553	27295	1	81741	ENSG00000154553	8	2802	1095	73	1634
ENST00000284770	PDLIM3	Q53GG5	ENSG00000154553	27295	1	81742	ENSG00000154553	5	1264	594	73	597
ENST00000284771	PDLIM3	Q53GG5	ENSG00000154553	27295	1	81744	ENSG00000154553	7	1672	951	178	543
ENST00000284776	SORBS2	O94875	ENSG00000154556	8470	7	81758	ENSG00000154556	21	5996	3303	510	2183
ENST00000284878	CXADR	P78310	ENSG00000154639	1525	9	233789	ENSG00000154639	7	5593	1098	87	4408
ENST00000284957	RABGEF1	Q9UJ41	ENSG00000154710	27342	8	105182	ENSG00000154710	9	3733	1476	77	2180
ENST00000284971	ATP5PF	P18859	ENSG00000154723	522	7	235377	ENSG00000154723	4	614	327	127	160
ENST00000285021	XPC	Q01831	ENSG00000154767	7508	1	66017	ENSG00000154767	16	3832	2823	215	794
ENST00000285039	MYO5B	Q9ULV0	ENSG00000167306	4645	6	213593	ENSG00000167306	40	9583	5547	354	3682
ENST00000285093	ACAA2	P42765	ENSG00000167315	10449	3	213585	ENSG00000167315	10	2926	1194	49	1683
ENST00000285106	CXXC1	Q9P0U4	ENSG00000154832	30827	5	213635	ENSG00000154832	15	2936	1971	715	250
ENST00000285124	PPP4R1	Q8TF05	ENSG00000154845	9989	5	212514	ENSG00000154845	20	2917	255	21	2641
ENST00000285206	SAMD14	Q8IZD0	ENSG00000167100	201191	9	207374	ENSG00000167100	9	2874	1290	0	1584
ENST00000285208	RAB6B	Q9NRW1	ENSG00000154917	51560	7	70215	ENSG00000154917	8	5596	627	416	4553
ENST00000285379	CA2	P00918	ENSG00000104267	760	1	116715	ENSG00000104267	7	1562	783	75	704
ENST00000285419	PIP4P2	Q8N4L2	ENSG00000155099	55529	9	121148	ENSG00000155099	7	2759	774	110	1875
ENST00000285420	OTUD6B	Q8N6M0	ENSG00000155100	51633	6	116852	ENSG00000155100	7	3298	972	99	2227
ENST00000285518	AGPAT5	Q9NUQ2	ENSG00000155189	55326	3	114046	ENSG00000155189	8	5237	1095	27	4115
ENST00000285599	MAN2B2	Q9Y2E5	ENSG00000013288	23324	9	73054	ENSG00000013288	19	5129	3030	22	2077
ENST00000285735	RHOC	P08134	ENSG00000155366	389	1	37030	ENSG00000155366	6	2199	582	1210	407
ENST00000285848	OXA1L	Q15070	ENSG00000155463	5018	3	169271	ENSG00000155463	10	1719	1488	0	231
ENST00000285873	GEMIN5	Q8TEQ6	ENSG00000082516	25929	1	91719	ENSG00000082516	28	5404	4527	78	799
ENST00000285896	CNOT8	Q9UFF9	ENSG00000155508	9337	9	86458	ENSG00000155508	7	2528	879	295	1354
ENST00000285900	GRIA1	P42261	ENSG00000155511	2890	9	86380	ENSG00000155511	16	5584	2721	219	2644
ENST00000285930	AKR1B1	P15121	ENSG00000085662	231	4	113035	ENSG00000085662	10	1361	951	38	372
ENST00000285968	NUP205	Q92621	ENSG00000155561	23165	1	107705	ENSG00000155561	43	6264	6039	28	197
ENST00000286067	LCOR	Q96JN0	ENSG00000196233	84458	7	133590	ENSG00000196233	1	4542	3744	107	691
ENST00000286091	PDIA4	P13667	ENSG00000155660	9601	2	113492	ENSG00000155660	10	2921	1941	254	726
ENST00000286175	PPIL3	Q9H2H8	ENSG00000240344	53938	6	56725	ENSG00000240344	7	1370	498	384	488
ENST00000286307	LSM11	P83369	ENSG00000155858	134353	9	86540	ENSG00000155858	4	6567	1083	39	5445
ENST00000286364	RASA2	Q15283	ENSG00000155903	5922	5	63239	ENSG00000155903	24	5650	2550	57	3043
ENST00000286398	SMC2	O95347	ENSG00000136824	10592	1	125384	ENSG00000136824	25	5992	3594	304	2094
ENST00000286428	VBP1	P61758	ENSG00000155959	7411	7	244787	ENSG00000155959	6	1616	594	23	999
ENST00000286448	VAMP7	P51809	ENSG00000124333	6845	8	244801	ENSG00000124333	8	2594	663	113	1818
ENST00000286452	KIF5A	Q12840	ENSG00000155980	3798	8	155376	ENSG00000155980	26	3527	2832	228	467
ENST00000286485	PSD3	Q9NYI0	ENSG00000156011	23362	7	119182	ENSG00000156011	13	6665	1542	90	5033
ENST00000286548	GNAQ	P50148	ENSG00000156052	2776	9	128622	ENSG00000156052	7	6882	1080	576	5226
ENST00000286621	ADK	P55263	ENSG00000156110	132	1	132842	ENSG00000156110	12	1622	1044	55	523
ENST00000286648	DCK	P27707	ENSG00000156136	1633	4	74519	ENSG00000156136	7	2506	783	187	1536
ENST00000286688	C8orf37	Q96NL8	ENSG00000156172	157657	1	121334	ENSG00000156172	6	3340	624	12	2704
ENST00000286713	STOM	P27105	ENSG00000148175	2040	6	129774	ENSG00000148175	7	3145	867	63	2215
ENST00000286788	CCT8	P50990	ENSG00000156261	10694	7	235455	ENSG00000156261	15	1854	1647	58	149
ENST00000286824	TSPAN7	P41732	ENSG00000156298	7102	9	241957	ENSG00000156298	9	1270	801	3	466
ENST00000286835	SCAF4	O95104	ENSG00000156304	57466	6	235528	ENSG00000156304	20	4269	3444	426	399
ENST00000286953	ATP5MPL	P56378	ENSG00000156411	9556	7	176873	ENSG00000156411	4	643	177	88	378
ENST00000287022	UQCRB	P14927	ENSG00000156467	7381	3	121343	ENSG00000156467	4	5575	336	104	5135
ENST00000287038	RPL30	P62888	ENSG00000156482	6156	3	121373	ENSG00000156482	5	498	348	70	80
ENST00000287156	UBE2L6	O14933	ENSG00000156587	9246	5	147968	ENSG00000156587	4	1219	462	61	696
ENST00000287295	AIFM1	O95831	ENSG00000156709	9131	7	247372	ENSG00000156709	16	2222	1842	185	195
ENST00000287394	ATAD2	Q6PL18	ENSG00000156802	29028	1	122063	ENSG00000156802	28	5547	4173	90	1284
ENST00000287437	NSMCE2	Q96MF7	ENSG00000156831	286053	1	117707	ENSG00000156831	8	1188	744	209	235
ENST00000287546	VPS8	Q8N3P4	ENSG00000156931	23355	9	64820	ENSG00000156931	47	5047	4287	171	589
ENST00000287598	BUB1B	O60566	ENSG00000156970	701	1	178185	ENSG00000156970	23	3725	3153	195	377
ENST00000287600	PDE6D	O43924	ENSG00000156973	5147	9	57793	ENSG00000156973	5	1140	453	168	519
ENST00000287647	FANCD2	Q9BXW9	ENSG00000144554	2177	1	58746	ENSG00000144554	43	5219	4416	93	710
ENST00000287652	TATDN2	Q93075	ENSG00000157014	9797	9	58765	ENSG00000157014	8	5342	2286	1051	2005
ENST00000287701	HMBOX1	Q6NT76	ENSG00000147421	79618	1	115071	ENSG00000147421	10	3711	1263	341	2107
ENST00000287727	ZFYVE9	O95405	ENSG00000157077	9372	9	25223	ENSG00000157077	19	5194	4278	452	464
ENST00000287912	RBM33	Q96EV2	ENSG00000184863	155435	8	108645	ENSG00000184863	6	1404	807	426	171
ENST00000287936	HMGCR	P04035	ENSG00000113161	3156	4	83846	ENSG00000113161	20	4530	2667	104	1759
ENST00000287957	GATAD1	Q8WUU5	ENSG00000157259	57798	5	106019	ENSG00000157259	5	4571	810	248	3513
ENST00000288022	PDF	Q9HBH1	ENSG00000258429	64146	6	195231	ENSG00000258429	2	2859	732	18	2109
ENST00000288111	DHRS1	Q96LJ7	ENSG00000157379	115817	5	174190	ENSG00000157379	9	1427	942	224	261
ENST00000288221	ERC2	O15083	ENSG00000187672	26059	9	68063	ENSG00000187672	18	6239	2874	360	3005
ENST00000288235	MYO1E	Q12965	ENSG00000157483	4643	2	183232	ENSG00000157483	28	8644	3327	371	4946
ENST00000288344	HMGN1	P05114	ENSG00000205581	3150	5	235916	ENSG00000205581	7	1303	147	74	1082
ENST00000288398	TPM1	P09493	ENSG00000140416	7168	9	179330	ENSG00000140416	10	1295	855	198	242
ENST00000288422	TAB3	Q8N5C8	ENSG00000157625	257397	9	245354	ENSG00000157625	6	805	142	663	0
ENST00000288466	ZNF618	Q5T7W0	ENSG00000157657	114991	4	125627	ENSG00000157657	14	9109	2586	99	6424
ENST00000288548	KLHL29	Q96CT2	ENSG00000119771	114818	9	42289	ENSG00000119771	7	3043	1628	0	1415
ENST00000288670	FMNL2	Q96PY5	ENSG00000157827	114793	9	46761	ENSG00000157827	26	5630	3279	430	1921
ENST00000288699	DPYSL5	Q9BPU6	ENSG00000157851	56896	9	42428	ENSG00000157851	13	5178	1695	127	3356
ENST00000288723	RAB28	P51157	ENSG00000157869	9364	1	77871	ENSG00000157869	8	1810	663	215	932
ENST00000288937	MRPL17	Q9NRX2	ENSG00000158042	63875	3	146220	ENSG00000158042	3	2305	528	44	1733
ENST00000288986	NCK1	P16333	ENSG00000158092	4690	2	63035	ENSG00000158092	4	1937	1134	130	673
ENST00000289175	LRRFIP1	Q32MZ4	ENSG00000124831	9208	1	49800	ENSG00000124831	8	3709	2259	311	1139
ENST00000289228	ACTR1B	P42025	ENSG00000115073	10120	8	53904	ENSG00000115073	11	2204	1131	154	919
ENST00000289290	PLS3	P13797	ENSG00000102024	5358	1	243748	ENSG00000102024	18	2277	1854	226	197
ENST00000289495	PPP1R9A	Q9ULJ8	ENSG00000158528	55607	9	106115	ENSG00000158528	18	3983	3891	31	61
ENST00000289656	OBSL1	O75147	ENSG00000124006	23363	1	57508	ENSG00000124006	9	2274	1839	298	137
ENST00000289893	MACF1	Q9UPN3	ENSG00000127603	23499	8	24242	ENSG00000127603	64	19141	17817	131	1193
ENST00000289968	ARHGAP17	Q68EM7	ENSG00000140750	55114	1	193433	ENSG00000140750	20	3495	2646	108	741
ENST00000290037	SEC16A	O15027	ENSG00000148396	9919	6	130569	ENSG00000148396	29	8982	7005	319	1658
ENST00000290039	CACHD1	Q5VU97	ENSG00000158966	57685	4	25637	ENSG00000158966	27	5274	3672	105	1497
ENST00000290101	RAP1GAP	P47736	ENSG00000076864	5909	9	33454	ENSG00000076864	27	3584	2079	258	1247
ENST00000290155	CFAP298	P57076	ENSG00000159079	56683	4	235555	ENSG00000159079	7	3516	873	134	2509
ENST00000290158	KPNB1	Q14974	ENSG00000108424	3837	1	200172	ENSG00000108424	22	6058	2631	326	3101
ENST00000290231	NCOA5	Q9HCD5	ENSG00000124160	57727	6	232723	ENSG00000124160	8	3224	1740	175	1309
ENST00000290244	CRYZL1	O95825	ENSG00000205758	9946	9	235649	ENSG00000205758	12	1685	1005	244	436
ENST00000290246	ELMO2	Q96JJ3	ENSG00000062598	63916	8	232743	ENSG00000062598	22	3666	2163	193	1310
ENST00000290291	OGFR	Q9NZT2	ENSG00000060491	11054	5	230601	ENSG00000060491	7	2410	2034	25	351
ENST00000290299	ATP5PO	P48047	ENSG00000241837	539	7	235673	ENSG00000241837	7	756	642	41	73
ENST00000290341	IGF2BP1	Q9NZI8	ENSG00000159217	10642	4	200386	ENSG00000159217	15	8796	1734	361	6701
ENST00000290354	CBR3	O75828	ENSG00000159231	874	2	234240	ENSG00000159231	3	998	834	114	50
ENST00000290460	SCUBE1	Q8IWY4	ENSG00000159307	80274	4	240920	ENSG00000159307	8	2258	1044	62	1152
ENST00000290573	HK2	P52789	ENSG00000159399	3099	4	44311	ENSG00000159399	18	5772	2754	600	2418
ENST00000290583	CELF3	Q5SZQ8	ENSG00000159409	11189	9	37907	ENSG00000159409	13	5582	1398	783	3401
ENST00000290585	CELF3	Q5SZQ8	ENSG00000159409	11189	9	37908	ENSG00000159409	12	2335	1248	32	1055
ENST00000290597	ALDH4A1	P30038	ENSG00000159423	8659	3	33276	ENSG00000159423	16	2124	1692	30	402
ENST00000290650	UBR1	Q8IWV7	ENSG00000159459	197131	8	182423	ENSG00000159459	47	7698	5250	16	2432
ENST00000290776	CPNE2	Q96FN4	ENSG00000140848	221184	1	189261	ENSG00000140848	16	2601	1647	243	711
ENST00000290810	NAE1	Q13564	ENSG00000159593	8883	3	194885	ENSG00000159593	20	1813	1605	77	131
ENST00000290858	CBFB	Q13951	ENSG00000067955	865	3	189735	ENSG00000067955	6	3134	549	259	2326
ENST00000290913	CHCHD6	Q9BRQ6	ENSG00000159685	84303	7	62615	ENSG00000159685	8	1000	708	73	219
ENST00000290949	ATP6V0D1	P61421	ENSG00000159720	9114	9	195003	ENSG00000159720	8	1636	1056	71	509
ENST00000291107	ABR	Q12979	ENSG00000159842	29	7	202993	ENSG00000159842	22	2673	2469	32	172
ENST00000291439	AP1M1	Q9BXS5	ENSG00000072958	8907	9	216546	ENSG00000072958	12	13193	1272	449	11472
ENST00000291478	KALRN	O60229	ENSG00000160145	8997	8	62522	ENSG00000160145	27	10888	3870	163	6855
ENST00000291547	PKNOX1	P55347	ENSG00000160199	5316	2	234603	ENSG00000160199	11	5300	1311	159	3830
[truncated: 21,956 more rows]

## Sheet: CDS.structure.MFE
transcript_id	gene_symbol	UniProt	ENSG_id	gene_id	module	MFE_min
[truncated: 8,843 more rows]

[truncated: 5 more sheets: 5UTR.structure.MFE, 3UTR.structure.MFE, Kozak.score, uORF.count, AU_element_frac]
