# Supplementary material for: Integrated transcriptome and proteome analysis reveals posttranscriptional regulation of ribosomal genes in human brain organoids
Source: eLife. 2023 Mar 29;12:e85135. doi: 10.7554/eLife.85135 (PMC10059687; doi:10.7554/eLife.85135)
Supplement: Figure 4—figure supplement 6—source data 1. [file elife-85135-fig4-figsupp6-data1.xlsx]

## Sheet: RNA relative stability
GeneID	UniProt	gene_symbol	module	X100981.Sox2.GFP_d40.x	X100983.Sox2.GFP_d40.x	X100992.Syn.Tom_d40.x	X110954.Sox2.GFP_d40.x	X110956.Syn.Tom_d40.x	X110957.Syn.Tom_d40.x	X114326.Sox2.GFP_d60.x	X114328.Syn.Tom_d60.x	X114329.Sox2.GFP_d60.x	X114331.Syn.Tom_d60.x	X114332.Sox2.GFP_d90.x	X114334.Syn.Tom_d90.x	X116151.Sox2.GFP_d60.x	X116153.Syn.Tom_d60.x	X116154.Sox2.GFP_d90.x	X116156.Syn.Tom_d90.x	X116157.Sox2.GFP_d90.x	X116159.Syn.Tom_d90.x	X121570.Sox2.GFP_d120.x	X121572.Syn.Tom_d120.x	X121573.Sox2.GFP_d120.x	X121575.Syn.Tom_d120.x	X122062.Sox2.GFP_d120.x	X122064.Syn.Tom_d120.x
ENSG00000000003	O43657	TSPAN6	2	-0.0717363	1.02015	-0.236046	0.27634	-0.174254	-0.0685019	0.404388	-1.28581	-0.178131	-0.32378	-0.0121141	-0.264468	-0.272731	0.0801238	-0.0757734	0.427554	0.973647	-0.5824	0.332514	-0.648697	0.359469	-0.442941	0.768872	-0.00566499
ENSG00000000419	O60762	DPM1	1	0.390965	-0.0172493	-0.163943	0.0540468	-0.377727	-0.324023	0.273152	-0.145055	0.260746	-0.109459	-0.0547675	-0.172499	0.259477	-0.131041	0.250213	0.00251103	-0.0657423	-0.0244878	-0.0374587	0.0974072	0.0266263	-0.00498774	-0.0159523	0.0292501
ENSG00000001036	Q9BTY2	FUCA2	1	0.637891	0.946772	-0.765794	0.607446	-0.658452	-0.377337	0.74956	-0.937396	0.595828	-0.460832	0.336724	-0.457195	0.659782	-0.738409	0.881425	-0.216137	0.150887	-0.857385	0.6173	-0.346246	0.193018	-0.359591	0.263602	-0.465462
ENSG00000001561	Q9Y6X5	ENPP4	7	0.0754649	-0.07761	0.256405	-0.199303	0.0905467	0.156511	-0.0604928	0.0534349	-0.542776	0.236726	-0.234511	-0.00710007	-0.778086	-0.214537	0.0379754	0.596302	-0.0932419	0.46677	0.0176405	0.399814	0.124849	-0.156552	-0.414266	0.266037
ENSG00000001630	Q16850	CYP51A1	4	0.0136432	-0.057292	0.367479	-0.155523	-0.168046	-0.355566	0.0664339	0.282743	-0.334515	0.136214	-0.115654	0.229096	-0.0447716	0.497326	0.0417236	0.347399	0.240295	-0.0268972	-0.185965	-0.139975	0.220978	-0.540829	-0.115241	-0.203055
ENSG00000002549	P28838	LAP3	2	0.140793	-0.0429495	-0.0778936	0.147108	-0.699649	-0.819648	0.37444	-0.127312	0.0397118	0.14823	0.126726	0.167784	0.306985	0.422276	0.188907	-0.119587	0.436368	-0.300227	0.221073	-0.444866	0.0294032	-0.370836	0.303479	-0.0503132
ENSG00000002586	P14209	CD99	1	-0.0555731	0.190086	0.613138	-0.164226	-0.3697	-1.23605	0.472857	-0.213882	0.100163	-0.397868	0.114272	-0.797986	0.483694	0.179201	0.39627	0.56488	-0.228696	-0.646503	0.505009	0.333151	0.0741396	1.1618	-0.313694	-0.764476
ENSG00000002746	Q76N89	HECW1	9	0.0923543	-0.00217414	0.373727	0.0509236	0.492489	0.286527	-0.275349	0.193231	0.0956105	0.0647047	0.120259	0.0570879	-0.0980739	0.227086	-0.188229	-0.391488	-0.252635	-0.301064	0.0412603	0.123709	-0.223604	-0.216503	-0.189111	-0.0807396
ENSG00000002834	Q14847	LASP1	9	-0.29332	-0.679399	-0.16778	-0.170691	0.114279	-0.246761	0.181927	0.210097	0.0986126	0.31287	-0.195208	0.12132	-0.101215	0.412565	-0.216434	-0.049538	-0.203734	0.227985	0.00821992	0.0673414	0.286512	0.0961475	0.0301225	0.156081
ENSG00000003393	Q96Q42	ALS2	9	-0.0203421	-0.0745036	0.0848674	0.0524918	0.332866	-0.107831	0.145376	0.046103	0.0727762	0.115816	-0.246796	-0.0476818	0.0965656	0.294388	-0.100908	0.106464	-0.0664816	-0.0270051	-0.212078	-0.110175	0.0365455	-0.0649853	-0.231341	-0.0741308
ENSG00000003756	P52756	RBM5	5	-0.206149	0.138876	-0.133524	-0.317863	0.161299	0.00756823	-0.155461	0.0308196	-0.185589	0.061208	-0.0921446	0.0798804	0.0226002	-0.0178753	0.0384167	0.158101	0.0782762	0.143407	-0.231431	0.00521378	0.0510055	0.244865	0.0248047	0.0936957
ENSG00000004142	Q9Y2S7	POLDIP2	9	-0.0514108	-0.410818	0.140401	-0.0930926	-0.162519	-0.107099	0.00664901	0.380948	-0.0441639	0.290888	-0.106095	0.00764634	-0.110527	0.295567	-0.161496	0.0975932	-0.0870613	0.221152	-0.13582	-0.108026	-0.00935543	0.0923241	-0.0588281	0.113144
ENSG00000004478	Q02790	FKBP4	7	0.16288	0.225609	0.0552519	0.345997	-0.0618502	-0.0153431	0.214222	0.322754	0.212972	0.240766	-0.309086	0.209092	0.350057	0.540328	-0.339979	0.143158	-0.318518	-0.0315578	-0.698886	-0.413926	-0.325713	0.0778355	-0.40374	-0.182325
ENSG00000004660	Q8N5S9	CAMKK1	9	-0.415803	-0.282834	0.149474	-0.160801	0.166611	0.650956	-0.22602	-0.207267	0.333887	0.175314	0.256981	0.0619086	0.401227	0.16884	0.304281	-0.0293515	-0.0183678	-0.0564127	-0.600636	-0.335443	-0.249357	0.0655898	-0.177696	0.0249192
ENSG00000004700	P46063	RECQL	1	0.360033	0.182361	-0.531633	0.397594	-0.488971	-0.150608	0.496725	-0.247807	0.354173	-0.336338	0.173903	-0.225258	0.315983	-0.556574	0.362875	-0.123271	0.137389	-0.453826	0.164923	-0.0310009	0.545847	-0.0401098	-0.144695	-0.161714
ENSG00000004766	Q96JG6	VPS50	9	-0.25325	-0.293199	0.400318	-0.199328	0.0344867	0.281714	0.267018	0.464683	-0.159703	0.501785	-0.0451116	-0.0821066	-0.0130346	0.231256	0.0324367	0.168306	-0.130231	-0.355046	-0.269693	-0.127012	-0.224224	0.254002	-0.284917	-0.19915
ENSG00000004779	O14561	NDUFAB1	7	-0.307501	-0.0761295	0.522427	-0.171306	-0.0142571	0.271737	0.194837	0.456451	0.115434	0.662026	-0.794523	-0.0117178	0.106438	0.687897	-0.186998	0.115388	-0.624617	-0.0385728	-0.172922	-0.174136	-0.223263	-0.175114	-0.274006	0.112428
ENSG00000004848	Q96QS3	ARX	1	-0.389965	-0.266076	0.268687	0.230227	1.04918	0.996821	0.222795	-0.311196	0.156147	-2.21093	0.293167	0.843621	0.154648	0.223183	-0.140212	0.0329795	0.415471	0.260516	-0.52832	0.399145	-0.664991	-0.213234	-0.00563446	-0.816026
ENSG00000004975	O14641	DVL2	1	0.203605	0.301941	-0.450721	0.520788	-0.320648	-0.881077	0.475454	-0.15733	0.368667	-0.424798	0.200901	-0.317029	0.463479	-0.264957	0.266905	-0.148116	0.287984	-0.351869	0.141137	-0.085287	0.364476	0.156173	-0.0538791	-0.295799
ENSG00000005175	Q9H6T3	RPAP3	1	0.521131	0.180561	0.222266	0.51176	0.459827	0.130398	0.169326	-0.255785	-0.130402	-0.40379	-0.0476099	0.190925	0.280588	-0.153488	-0.00268749	-0.202882	0.0432587	-0.192795	0.141268	-0.295377	0.17236	-0.649274	-0.223461	-0.466117
ENSG00000005249	P31323	PRKAR2B	9	-0.207237	-0.0592924	0.220203	0.206334	0.649187	0.173869	0.194929	-0.00336451	0.394555	0.116176	-0.0260793	-0.323376	0.405686	0.37729	0.312486	-0.0949182	-0.509996	-0.286752	-0.315552	-0.0901578	-0.220412	-0.153503	-0.426016	-0.334059
ENSG00000005339	Q92793	CREBBP	5	-0.129929	-0.246854	0.00320737	0.206103	-0.0731746	-0.219412	-0.102536	-0.180686	-0.071711	-0.29153	0.268957	0.263431	0.175818	-0.0300321	-0.413963	-0.489588	0.0912487	0.00429733	0.231172	0.0288251	0.205114	0.12962	0.457269	0.184351
ENSG00000005448	Q9H977	WDR54	4	0.470836	0.639463	0.541907	0.63314	0.12409	0.290063	-0.530097	0.410646	0.581256	0.117168	0.10047	-0.223492	0.00685105	0.410221	0.32126	0.0238789	-0.500752	-0.635309	-0.45395	-0.294687	-0.407305	-0.721251	-0.415971	-0.488436
ENSG00000005469	Q9UKG9	CROT	3	0.091591	-0.065777	0.129291	-0.555244	-0.112872	-0.265376	-0.248582	-0.454723	-0.0376742	-0.307629	-0.0435516	-0.296339	0.222491	0.17842	0.210313	-0.0504062	0.35257	-0.10567	0.0510999	0.346445	-0.066561	0.17132	0.378318	0.478543
ENSG00000005483	Q8IZD2	KMT2E	8	-0.253505	-0.410509	-0.187268	-0.231001	0.1066	-0.170857	-0.0672581	-0.193503	-0.0681434	-0.101385	0.107738	0.360937	0.0287544	-0.149864	0.0560559	0.213347	-0.0408383	-0.0124398	0.169659	0.142778	0.219924	0.239328	0.13212	0.109332
ENSG00000005486	Q6NTF9	RHBDD2	7	-0.191745	0.0528765	0.314695	-0.0143534	0.0412239	0.475516	-0.486244	0.124555	-0.093805	0.172417	-0.541099	0.141452	-0.258026	0.323203	-0.130743	0.314347	-0.11481	0.430035	-0.258075	-0.014681	-0.444335	-0.202836	0.0562228	0.304209
ENSG00000005810	O75592	MYCBP2	8	-0.0670133	-0.627042	0.109833	0.00252934	0.173539	0.0702424	-0.0943503	0.0507909	-0.0623639	0.137423	0.123871	0.166681	0.0145429	0.140823	-0.00707223	0.24995	-0.363175	-0.0361894	0.0772483	0.388074	-0.363068	-0.200839	-0.0391039	0.154669
ENSG00000006007	Q9NZC3	GDE1	7	0.0561117	0.0591235	0.233739	0.175183	-0.12224	0.167882	0.246068	0.510875	0.32993	0.661263	-0.628408	-0.00686234	0.200522	0.479984	-0.191715	-0.0146725	-0.543183	0.204461	-0.48237	-0.0944737	-0.460063	-0.198999	-0.55906	-0.0230964
ENSG00000006047	Q9Y2T7	YBX2	9	-0.000340967	0.360604	0.0508859	-0.501129	0.608662	0.0320087	-0.0990636	0.476462	-0.217139	0.327998	-0.0629225	-0.0388434	-0.0969084	-0.322746	-0.596983	0.103729	0.164278	0.71964	-0.552054	-0.118754	-0.893963	0.271711	0.451951	-0.0670828
ENSG00000006118	Q24JP5	TMEM132A	9	-0.407121	0.0368855	0.0651843	-0.164932	0.201718	0.312199	-0.207606	0.046597	-0.184446	0.0105244	0.146643	-0.0541194	-0.372804	-0.139288	-0.0418269	-0.0718264	0.257244	0.315764	-0.0407463	-0.107717	-0.266277	0.0461663	0.296045	0.32374
ENSG00000006125	P63010	AP2B1	9	0.112265	-0.160207	0.823524	0.200024	0.702648	0.245465	-0.0070814	0.600718	-0.185142	0.53514	-0.336643	0.134921	-0.022327	0.621475	-0.232385	-0.27305	-0.507655	-0.0487314	-0.367876	-0.329906	-0.516514	-0.364517	-0.378987	-0.245158
ENSG00000006715	P49754	VPS41	6	-0.0500388	-0.170508	-0.0727728	-0.179482	-0.124452	0.122883	0.075522	0.329403	0.329135	0.289278	0.00189908	-0.00295278	0.103855	0.249485	0.135282	0.0324897	-0.0768954	-0.16726	-0.150764	-0.139716	-0.101488	-0.142748	-0.188052	-0.102103
ENSG00000006744	Q9BQ52	ELAC2	5	0.106628	0.0082183	-0.0358938	0.338848	-0.524488	-0.276806	0.480101	-0.0262787	-0.0750172	0.239949	0.0408441	-0.19804	0.426349	0.20523	-0.128125	-0.0382901	-0.101068	0.0714486	0.0593813	-0.291069	0.0637242	-0.196573	-0.195228	0.0461544
ENSG00000007168	P43034	PAFAH1B1	9	-0.165019	-0.820214	0.615871	-0.209828	0.353193	0.257626	-0.330412	0.452158	0.0419543	0.536625	-0.148958	0.124746	-0.182041	0.640164	-0.454112	-0.0279001	-0.236169	-0.0134109	-0.316892	0.127066	-0.405975	0.0948884	-0.0884921	0.155132
ENSG00000007237	O60861	GAS7	7	0.414511	-0.0813803	1.02519	0.448002	0.500753	0.730632	-0.0330884	0.89918	-0.57057	0.566338	0.227158	-0.562134	0.0246473	0.987287	-0.675627	-1.5561	-0.0124343	-1.00454	-0.151611	0.389195	-0.45848	0.0944427	-0.821111	-0.380254
ENSG00000007372	P26367	PAX6	1	0.069973	0.070263	-0.101148	0.0138008	0.336139	0.236344	0.0400905	-0.3266	0.017861	-0.239029	0.135166	0.523156	-0.0413466	-0.541995	0.00908618	0.432941	0.199026	-0.191137	-0.481875	0.196166	-0.333573	0.180618	0.0356671	-0.239595
ENSG00000007402	Q9NY47	CACNA2D2	7	0.19159	0.661187	-0.0630755	0.611025	0.0956511	0.112872	0.915193	0.146369	-0.640856	0.459299	0.521678	0.625587	0.143702	0.607339	-0.508246	-1.08606	-0.378905	0.465771	-0.461593	-0.207362	-0.402334	-0.932344	0.482541	-1.35903
ENSG00000008056	P17600	SYN1	9	-0.930921	-0.91026	0.652419	-0.435379	0.961286	0.30164	-0.408846	0.523648	1.25258	0.817437	0.102129	-1.15058	0.156728	1.09125	-0.119294	0.678649	-0.432703	-0.640957	-0.872068	0.506806	-0.790599	0.754456	-0.161278	-0.946146
ENSG00000008083	Q92833	JARID2	4	0.239022	0.0296783	-0.0139672	0.415553	0.16661	-0.0769629	0.343658	-0.285165	0.443114	-0.0357543	-0.00590792	-0.434162	0.142493	0.308901	-0.149373	0.419781	-0.00768829	-0.0329446	-0.041615	-0.31719	-0.475422	0.0511979	-0.243627	-0.44023
ENSG00000008282	Q16563	SYPL1	1	0.648864	0.59826	-1.51104	0.66403	-1.5205	-1.33044	0.872048	-0.500274	0.729564	-0.336695	1.07633	-0.416747	0.789363	-0.191879	0.874414	-0.291195	1.19783	-0.29922	-0.00249922	-0.98954	-0.0892025	-0.562284	1.00732	-0.416519
ENSG00000008294	O60271	SPAG9	6	-0.0814022	-0.194205	0.313516	-0.0323093	0.175301	-0.140997	-0.118147	-0.0994752	-0.151537	-0.0797207	0.193165	0.0593147	0.0296832	-0.132325	0.107727	-0.0745468	-0.00640057	-0.194335	0.00222871	0.0695549	0.181417	0.200039	-0.00818803	-0.0183575
ENSG00000008300	Q9NYQ7	CELSR3	9	-0.137882	-0.196006	0.366357	0.167797	0.359679	0.345896	-0.148137	0.198682	0.146076	0.285419	-0.0469281	-0.304587	-0.151917	0.145062	-0.570773	-0.309069	0.148739	0.105319	-0.222515	0.141809	-0.294182	-0.0684915	-0.0255073	0.0651613
ENSG00000008311	Q9UDR5	AASS	3	0.0132081	0.201134	0.0702402	-0.278471	-0.439671	-0.0209933	0.106262	-0.17421	-0.1927	-0.119538	0.0761731	-0.22705	-0.154839	-0.208473	0.230615	-0.148605	-0.0195335	0.286121	0.235808	-0.296984	0.23716	0.527028	0.0734745	0.223843
ENSG00000008441	Q14938	NFIX	6	-0.880817	-0.906575	0.0681412	-0.478936	0.225422	0.620576	-0.38659	-0.165795	-0.251585	0.131508	0.21829	0.575026	-0.608912	-0.122999	0.0362517	0.369365	-0.258792	0.349937	0.209777	0.596692	-0.0992067	0.3194	-0.132831	0.572652
ENSG00000008869	Q9P2D3	HEATR5B	8	-0.120216	-0.468299	0.259227	0.19432	0.595131	0.232724	-0.17738	0.0233115	-0.320441	0.08023	0.30023	0.161776	-0.017537	0.290251	-0.305073	-0.0818349	-0.301328	-0.186169	-0.00497605	-0.0754958	-0.332702	0.196254	-0.099034	0.157031
ENSG00000008952	Q99442	SEC62	7	-0.166473	-0.0606512	0.213592	-0.590872	0.298344	0.0829183	-0.0243808	-0.0553687	-0.244269	0.160755	-0.130178	-0.0719062	-0.243438	-0.106616	-0.102498	0.140489	0.0890954	0.390614	-0.225217	0.178015	-0.115703	0.385336	0.045573	0.15284
ENSG00000009307	O75534	CSDE1	9	0.135513	-0.125751	0.444201	-0.0348761	0.225619	0.211374	-0.0923895	0.29236	-0.0906108	0.285242	-0.370125	0.151163	0.0816683	0.303607	-0.29979	0.0463899	-0.290793	0.20425	-0.292915	-0.209421	-0.256866	-0.123607	-0.314797	0.120555
ENSG00000009844	Q9NP79	VTA1	9	-0.15752	-0.153325	0.378795	-0.248345	0.145584	0.297015	0.0677914	0.112939	-0.0793816	0.419572	-0.0387907	-0.0495915	-0.135181	0.200008	-0.163638	-0.159064	-0.0384607	0.164754	-0.342556	-0.155392	-0.23728	0.347071	-0.207183	0.0321806
ENSG00000009954	Q9UIG0	BAZ1B	1	0.101253	-0.0992264	0.17908	0.010167	-0.126282	-0.0518219	-0.156048	-0.116667	-0.021659	-0.298086	0.075205	0.239008	0.219102	-0.133956	-0.207976	0.109492	0.124428	-0.0731735	0.00689685	-0.038513	0.0905587	0.159244	0.0554929	-0.0465194
ENSG00000010017	Q96S59	RANBP9	5	-0.129929	0.029145	0.0707341	-0.23843	0.113065	-0.00510433	0.105735	-0.178051	0.0582683	-0.0798723	0.0901459	0.0425	-0.0951818	-0.0418571	0.0963777	0.0475793	0.0465016	0.0801684	0.0342023	0.059119	0.0365187	0.0157355	0.0200765	-0.177447
ENSG00000010244	O43670	ZNF207	1	0.322054	-0.0554722	-0.168858	0.222698	-0.125282	-0.360911	0.37737	-0.0179394	0.105836	-0.145038	-0.048392	-0.228081	0.288134	-0.0441982	0.0516466	-0.00210766	0.119089	-0.291026	0.255783	-0.228192	0.179289	0.0147201	0.060364	-0.281485
ENSG00000010292	Q15021	NCAPD2	1	0.374911	0.308965	0.592744	0.766881	-0.776281	-0.678142	-0.00502164	-0.340917	0.299662	-0.119913	0.0313597	0.0713513	0.373475	-0.0392449	-0.460287	-0.595525	0.242077	0.251148	-0.320892	0.0134362	-0.222822	0.128075	0.209942	-0.104983
ENSG00000010322	Q9Y2I1	NISCH	8	-0.216017	-0.281484	0.229595	0.0110786	0.174383	0.494984	-0.108644	-0.0649064	0.0905653	0.197656	-0.290608	0.0395585	-0.240483	0.304206	-0.00386122	0.122668	0.217109	0.19535	-0.22439	-0.1584	-0.152021	-0.220129	-0.103221	-0.0129895
ENSG00000010404	P22304	IDS	9	-0.00976905	0.158499	0.772781	-0.403121	0.478597	0.548845	0.17729	0.636051	-0.219535	0.766128	-0.234152	-0.0122225	0.0873142	0.00516858	-0.109362	-0.126359	-0.180152	0.211225	-0.115081	-0.370218	-0.111238	-0.584429	-0.791227	-0.575033
ENSG00000010810	P06241	FYN	6	-0.359014	-0.400589	-0.0816215	-0.475364	-0.102902	-0.18408	0.0238874	-0.170662	0.0437062	-0.0105686	0.0853906	0.155505	-0.041714	-0.148991	-0.148715	0.188044	0.0171814	0.15696	-0.0222886	0.381371	0.00108324	0.431062	0.125623	0.536696
ENSG00000010818	P31629	HIVEP2	9	-1.08408	-0.689718	-0.175312	-0.899437	0.152935	-0.247075	-0.0674921	0.468529	0.106985	0.182915	-0.223857	0.318108	0.626182	0.372275	0.661263	0.538609	0.304804	0.212065	0.240952	0.296182	-0.515083	-0.684441	-0.261683	0.36637
ENSG00000011009	O95372	LYPLA2	7	0.113629	-0.295996	0.547137	-0.0987336	0.489674	0.30299	0.261292	0.641844	0.148688	0.730644	-0.584308	-0.0914685	0.192733	0.696162	-0.412386	0.40383	-0.482859	0.15043	-0.625643	-0.327006	-0.60828	-0.453873	-0.324979	-0.373523
ENSG00000011028	Q9UBG0	MRC2	1	0.00607756	0.432957	-0.474387	0.729131	-0.721374	-0.102503	-0.239344	0.451744	0.00318106	-1.43479	-0.242008	-0.508747	-0.0790891	0.353014	-0.44109	0.107643	-0.31398	0.997839	-0.131426	1.57574	0.246834	-0.734676	0.119364	0.399885
ENSG00000011295	Q6DKK2	TTC19	7	-0.000810685	0.134308	0.0564921	0.0319796	-0.111326	-0.138816	0.0947758	0.0446507	0.101131	0.260697	-0.0122903	-0.063803	0.103899	-0.00832766	0.0234366	0.0493364	-0.0258299	-0.0601245	-0.104327	-0.0784323	0.0303299	-0.124116	-0.163268	-0.0395646
ENSG00000011304	P26599	PTBP1	1	1.07003	1.08189	-0.246653	0.820889	0.666598	0.370085	0.546884	-0.522654	-0.202727	-0.422479	-0.0236583	-0.313826	0.304071	-1.14989	-0.141051	-0.990779	0.0805528	-0.117886	0.2593	-0.191152	0.252111	-0.634544	0.041309	-0.536415
ENSG00000011332	Q92782	DPF1	9	-0.210924	0.00257138	0.19257	-0.411535	0.429945	0.290613	-0.521795	0.0107954	-0.0962533	-0.00734709	0.56623	-0.108568	-0.495545	-0.0730323	-0.525755	0.23679	0.0927479	0.379266	-0.288845	0.197237	0.142926	0.0692339	-0.0942982	0.222972
ENSG00000011405	O00443	PIK3C2A	1	-0.141745	-0.176534	-0.556841	-0.0871734	-0.324207	-0.39433	0.204136	-0.313693	0.121014	-0.586884	0.303821	-0.0449941	0.311389	-0.338286	0.555	0.117707	0.142093	0.176445	0.453262	0.0760124	0.227595	0.24768	0.0654566	-0.0369238
ENSG00000011451	O95785	WIZ	5	-0.127796	-0.0249989	-0.169401	-0.156048	0.0845468	0.0447507	0.0738242	0.134668	-0.116056	0.0663528	-0.253348	0.0699533	0.0855599	0.13799	-0.112197	0.212992	-0.0600861	0.0835804	-0.0712786	0.0919721	0.00510286	0.110263	-0.0976312	-0.0127162
ENSG00000011454	Q9Y3P9	RABGAP1	7	-0.0278177	-0.0534265	0.112554	-0.0618267	-0.00749895	0.0450197	-0.0227625	0.0579132	-0.0592798	-0.129008	0.15038	0.0694264	0.0129852	0.0742664	0.0282696	-0.130246	0.0804917	-0.0301851	0.0079956	-0.130857	-0.0334829	0.0557248	0.016697	-0.0253319
ENSG00000011677	P34903	GABRA3	7	-0.302908	-0.569739	-0.243809	-0.360042	-0.245892	0.00669776	0.303709	-0.0429272	-0.139652	0.286254	-0.00246972	0.304631	-0.511367	0.760544	-0.440538	0.255717	-0.0919081	0.351124	-0.340579	0.57142	-0.0657165	0.149868	-0.122643	0.490228
ENSG00000012232	O43909	EXTL3	7	-0.306412	-0.00901094	-0.100862	0.0558421	-0.294976	-0.367827	0.16075	0.398698	0.0441327	0.394231	-0.0531844	-0.145891	0.0259091	0.163987	0.116101	0.187326	-0.0997521	-0.111661	-0.0826223	0.131274	-0.111342	0.282296	-0.0672146	-0.209793
ENSG00000012963	Q8N806	UBR7	1	0.229163	0.241401	-0.0332823	0.187955	-0.386263	-0.115823	0.0961592	-0.147477	0.293915	0.178334	-0.225584	-0.161174	0.150933	0.599607	0.144933	-0.065311	-0.138665	-0.241	0.19286	-0.247541	0.340796	-0.0967696	-0.389232	-0.407933
ENSG00000012983	Q9Y4K4	MAP4K5	9	-0.160579	-0.285823	-0.0736843	-0.310703	0.222642	0.0859444	-0.174075	0.0109932	-0.174147	0.113638	-0.100403	0.159789	-0.29776	0.107864	-0.051679	0.172957	-0.105397	0.0636952	-0.0832676	0.0398025	0.17712	0.408757	0.0519107	0.202405
ENSG00000013288	Q9Y2E5	MAN2B2	9	-0.206	0.0558212	-0.140949	-0.619735	0.381356	0.124389	-0.22299	0.386388	-0.12467	0.151894	0.0207974	0.118808	-0.0716098	0.0861946	-0.245303	0.248598	0.210453	0.382633	-0.0459599	0.309833	-0.702084	-0.225595	0.019447	0.108283
ENSG00000013374	Q9Y5A7	NUB1	5	-0.0625952	-0.0508094	-0.27151	0.126967	0.162986	-0.0269571	0.0407853	-0.210875	0.0535545	-0.19823	0.192792	0.180366	0.0265536	-0.0780637	-0.0650039	0.0647474	0.163577	-0.0550803	0.0472943	0.046149	-0.0937105	0.0627577	-0.0145385	-0.0411562
ENSG00000013375	O95394	PGM3	2	0.624046	0.889013	-0.793434	0.371702	-0.103468	-0.39049	0.565103	-0.540585	0.363056	-0.565988	0.25432	-0.242007	0.233953	-0.712502	0.490678	-0.207995	0.203881	-0.299386	0.418651	-0.408744	0.418053	-0.353697	0.0273868	-0.241547
ENSG00000013441	P49759	CLK1	8	-0.0914457	0.120085	0.100046	-0.493103	0.176377	0.140754	-0.53687	-0.0685177	-0.376156	0.0890958	0.0185736	0.377942	-0.408284	0.071808	0.157066	0.364446	-0.059287	0.243935	0.0394721	0.138039	-0.199539	0.0267358	0.0617578	0.107069
ENSG00000013810	Q9Y6A5	TACC3	1	-0.0426299	0.430607	0.256353	-0.152197	-0.0771119	-0.00115143	-0.0719145	0.0179	0.0930595	-0.0367834	0.299566	0.373342	-0.194674	-0.630185	0.0473159	-1.01234	-0.0545808	-0.207352	-0.135948	0.23053	0.398917	-0.265404	-0.122298	0.856978
ENSG00000014123	O94874	UFL1	1	0.220524	0.0977684	-0.126646	0.0447366	-0.0722672	-0.255018	-0.0231424	-0.478344	-0.0169527	-0.107805	0.0156244	0.258878	0.0933774	0.0165873	0.149495	0.153137	0.21182	0.30002	-0.247704	-0.23534	-0.0643723	-0.0959907	0.00705672	0.154557
ENSG00000014138	Q14181	POLA2	1	-0.305628	0.251555	-0.324926	1.21937	-0.149118	0.703842	0.446987	-0.947704	0.520711	-0.955369	-0.122649	-0.880704	0.768102	0.592521	0.610718	-0.273254	0.557789	-1.10813	0.0909105	-0.190055	-0.0300859	-0.658809	0.554539	-0.370614
ENSG00000014216	P07384	CAPN1	6	-0.373024	-0.0750191	0.0059932	0.185837	-0.221281	-0.216047	0.155291	0.373004	0.0614515	0.496994	-0.230072	-0.00624749	0.0476685	0.524574	-0.233579	0.189364	-0.10904	-0.107384	0.0392982	-0.0169206	-0.0812092	0.102845	-0.264191	-0.248304
ENSG00000014641	P40925	MDH1	7	-0.102312	0.600565	0.447565	-0.0731134	0.164576	0.174311	0.479211	0.346376	0.25035	0.25311	-0.524026	-0.255245	0.134155	0.496817	0.273699	0.269784	-0.618532	-0.116447	-0.479311	-0.467274	-0.305252	0.0370158	-0.771654	-0.214368
ENSG00000014824	Q6PML9	SLC30A9	9	-0.0263947	-0.35133	0.0967316	-0.261743	0.0584766	-0.04425	0.0333472	0.459599	-0.0704592	0.387879	0.0749112	-0.0342007	-0.0160342	0.43024	-0.291099	-0.102862	0.0226705	-0.0798259	-0.223785	0.00647369	-0.144802	-0.00465092	0.0639164	0.0171917
ENSG00000015676	Q8IVD9	NUDCD3	8	-0.636018	-0.728406	0.391476	-0.408874	0.158566	0.205864	-0.413167	0.45721	-0.320904	0.484391	-0.350224	0.484921	-0.289858	0.445101	-0.407709	0.148389	-0.210561	0.518711	-0.511243	0.172628	-0.393107	0.520886	0.107641	0.574288
ENSG00000017260	P98194	ATP2C1	9	-0.0468392	-0.126684	-0.0874648	-0.172592	-0.108041	-0.122682	0.254375	0.307122	0.0972934	0.302824	-0.0639989	-0.148719	0.163163	0.170611	0.126424	0.095924	-0.022497	-0.0855506	-0.0481052	-0.366789	0.0311675	-0.0119016	0.0719216	-0.208962
ENSG00000017797	Q15311	RALBP1	2	0.0954528	-0.119464	-0.479539	0.00381273	-0.16809	-0.356108	-0.0462199	0.0500925	0.0282867	-0.24688	-0.168612	0.0243516	0.172446	-0.21128	0.2093	0.284179	0.0300581	-0.073984	-0.0850108	0.0635382	0.220564	0.448688	0.129872	0.194548
ENSG00000018189	Q7L099	RUFY3	8	-0.458196	-0.403133	0.677376	-0.359668	0.550915	0.456613	-0.0593707	0.0211442	-0.248155	-0.215091	0.176583	-0.20345	-0.0444234	-0.0566564	0.062027	-0.0465466	0.289858	-0.284179	-0.0213677	-0.00457131	0.154844	0.316579	-0.0302847	-0.270846
ENSG00000018236	Q12860	CNTN1	9	0.648729	-0.595042	1.11141	-0.37132	0.808374	0.413187	0.349851	0.539614	-0.697089	0.361083	1.3415	-0.19854	1.3162	0.599511	0.163437	-0.91144	-0.682512	-0.506605	-0.100253	-0.274315	-0.80103	-1.04345	-0.943953	-0.527342
ENSG00000018510	O00116	AGPS	4	0.0979195	-0.408244	0.2925	0.0380298	-0.0861643	0.25423	-0.0516892	-0.0027591	0.132429	0.0537364	-0.071856	0.0901385	0.128659	0.446876	-0.0369443	0.154357	-0.386704	-0.195346	0.114617	-0.218022	0.0515143	-0.188339	-0.227696	0.0187586
ENSG00000018699	Q6P3X3	TTC27	1	0.216264	0.0490189	-0.0126662	0.384531	-0.103677	-0.722635	0.006057	0.416788	0.0251573	0.211848	0.0627163	0.120003	0.0009706	0.0168541	-0.283397	-0.220381	0.0376357	-0.0560035	-0.154044	-0.3922	0.00741177	0.107564	0.259423	0.022761
ENSG00000020129	Q9UBB6	NCDN	9	-0.123812	0.0224934	0.158517	-0.933278	0.0262127	0.179956	-0.301361	0.542137	-0.789975	-0.189614	0.0237334	-0.0972853	-0.0600779	-0.194979	0.0510012	0.724645	-0.417566	0.356205	-0.798711	0.320663	0.239116	0.907873	-0.137721	0.491826
ENSG00000020922	P49959	MRE11	1	0.0808651	0.375564	0.0679499	-0.0878298	-0.399163	-0.516739	0.23322	-0.795217	-0.220879	-0.0820658	-0.149627	-0.564965	0.513871	-0.300164	0.519812	-0.00429166	0.222994	-0.077023	0.608655	-0.384234	0.377995	0.178237	0.25564	0.147396
ENSG00000021762	Q9H0X9	OSBPL5	9	-0.322744	-0.0458112	-0.0180906	0.0335608	-0.130676	-0.00327295	-0.0744635	0.00339575	0.117988	-0.00712589	0.105321	-0.00442746	0.299304	0.250593	-0.362538	-0.0873941	0.146341	-0.000797636	0.102761	0.150022	-0.34945	0.134836	-0.0731088	0.135777
ENSG00000022267	Q13642	FHL1	4	0.360004	0.168288	-0.0159987	0.514352	-0.268322	0.0352229	-0.123356	-0.00360289	0.15731	-0.0327668	0.174796	0.187013	0.307836	-0.271062	0.189325	0.0454948	-0.176635	0.138186	-0.0416599	-0.303634	-0.436411	-0.141884	-0.346194	-0.1163
ENSG00000023171	Q3KR37	GRAMD1B	6	-0.451159	-0.169609	0.426391	-0.191236	-0.0608057	-0.12081	0.166124	0.434081	-0.163025	0.110861	0.0594325	0.2529	-0.335481	0.0537041	0.0187504	0.0414169	-0.102771	0.275915	0.0492029	0.385802	-0.302466	-0.285198	-0.268206	0.176185
ENSG00000023228	P28331	NDUFS1	3	0.124648	-0.109902	0.153579	0.0159842	-0.184989	-0.223436	0.162302	-0.05038	0.139521	-0.0433626	0.130632	-0.27668	0.170014	0.0201266	0.00569188	-0.431571	0.278134	-0.150254	0.272144	-0.248962	0.250171	-0.196027	0.195333	-0.00271721
ENSG00000023287	Q8TDY2	RB1CC1	5	-0.0565753	-0.487237	0.125468	-0.305312	0.0396235	-0.208719	0.0197093	0.266636	-0.014594	0.456677	0.221695	0.163933	0.112636	0.185505	-0.053529	0.0522048	-0.0330586	0.0438271	-0.146075	-0.0229794	-0.113812	-0.0492259	-0.135347	-0.0614483
ENSG00000023697	Q9Y315	DERA	3	0.607795	0.40729	0.40406	0.492407	-0.309977	0.131575	-0.228162	-0.159463	0.266151	-0.0695345	-0.754013	-0.47614	0.248929	-0.0512085	0.0490346	0.245384	-0.288494	-0.107326	0.114294	0.00889993	0.0707144	0.357375	-0.734331	-0.22526
ENSG00000023734	Q9Y3F4	STRAP	7	0.0297643	-0.170875	0.247578	-0.232539	-0.00744636	0.0880991	0.125105	0.334851	0.0775317	0.304561	-0.427652	-0.0133693	-0.0284457	0.499721	-0.299983	0.104411	-0.192892	0.173483	-0.175306	-0.0117341	-0.332531	-0.0227277	-0.229581	0.159978
ENSG00000023902	Q53GL0	PLEKHO1	8	-0.0748081	0.177911	-0.0903382	-0.131539	-0.120382	-0.101752	0.0169521	-0.186325	0.0956658	-0.142983	0.0765925	0.147358	0.134389	-0.209756	-0.00455793	-0.00332596	-0.0471267	0.235098	0.0864183	-0.0295229	-0.0350062	0.0370216	-0.00358247	0.173599
ENSG00000023909	P48507	GCLM	2	0.064409	0.253987	-0.576217	-0.13837	-0.916493	-0.521212	0.230644	-0.555028	-0.0523526	-0.31757	0.809209	0.341391	0.469884	-0.658486	0.87663	-0.223696	0.962579	-0.345821	-0.230816	0.0624295	0.0715304	-0.0642265	0.705585	-0.247991
ENSG00000025770	Q6IBW4	NCAPH2	1	0.21161	0.137413	0.00282175	0.15185	0.0490521	-0.0256174	0.324475	0.0567215	0.0590875	-0.167954	-0.23946	-0.0855443	0.0110154	-0.0149468	0.0428584	-0.0762666	-0.262572	0.0449714	-0.12138	-0.163416	-0.023761	-0.0483785	-0.142562	0.279981
ENSG00000025772	Q15785	TOMM34	5	0.498435	-0.145816	-0.310545	0.270339	-0.828504	-0.427893	-0.171116	0.0222366	0.245698	0.144706	-0.21384	0.244884	0.0724951	-0.166981	-0.128689	0.387756	-0.138474	0.156039	0.161131	0.353705	-0.0581223	0.0822037	-0.260273	0.210624
ENSG00000026025	P08670	VIM	1	-0.471164	-0.308152	-0.578877	-0.195987	-0.346514	-0.251575	0.00745207	-0.163949	-0.109035	0.195402	0.427218	0.670287	-0.0523429	-0.011391	0.256056	0.0819671	0.308494	0.685917	-0.076133	-0.18751	0.374077	-0.509728	0.424736	-0.169249
ENSG00000027001	Q99797	MIPEP	4	0.744257	0.037645	0.335282	0.328786	-0.348608	0.145397	0.552168	-0.153084	0.359333	-0.0962416	-0.294052	-0.783065	0.141115	0.181265	0.0446409	-0.356596	-0.367036	-0.0667294	0.470852	-0.210226	-0.00554474	-0.0678818	-0.629987	0.0383117
ENSG00000028203	Q9HBM0	VEZT	9	0.153527	-0.0612828	0.0614634	0.00750787	0.0133691	0.0806852	0.0453473	-0.0719346	0.0695416	-0.0509041	0.0493915	0.157113	0.11436	0.06014	-0.0350174	-0.109082	-0.0362414	0.0308574	-0.130293	-0.209262	-0.1185	-0.0191967	-0.0217441	0.0201544
ENSG00000028528	Q13596	SNX1	2	0.38307	0.0762893	-0.399846	0.456598	-0.45372	-0.675355	0.452781	-0.245369	0.240377	-0.581976	0.404482	-0.348406	0.588354	-0.229517	0.294748	-0.594325	0.292894	-0.430763	0.480002	-0.249652	0.5458	-0.0483226	0.355377	-0.313522
ENSG00000028839	P62380	TBPL1	9	0.196144	0.187181	0.0825645	0.000454516	-0.0188618	-0.140229	0.0511492	-0.0214502	-0.0509746	-0.209429	-0.0435761	0.151582	0.295093	-0.0289341	-0.439598	0.0729512	-0.200143	0.12258	-0.301929	0.137537	-0.326229	0.139273	-0.0654321	0.410277
ENSG00000029639	Q8WVM0	TFB1M	5	0.265766	0.402649	0.0475379	-0.0998757	0.156301	-0.494258	0.282177	-0.578753	0.19001	-0.135748	0.0758864	-0.0617457	0.246995	-0.85578	0.0712217	-0.257414	0.437618	-0.278701	-0.230546	0.241458	0.0235624	0.305875	0.0650987	0.180667
ENSG00000029725	Q15276	RABEP1	9	-0.570584	-0.274208	0.420764	-0.302359	0.427333	0.377203	-0.525071	0.43585	-0.526447	0.534717	-0.217954	0.538621	-0.395262	0.741302	-0.574596	-0.0467527	-0.177951	0.175034	-0.428538	-0.0673831	-0.0614814	0.208501	0.0205794	0.288681
ENSG00000030066	Q12769	NUP160	5	0.369768	0.110375	-0.248821	0.265386	-0.170265	-0.170015	0.212625	-0.275701	0.158105	-0.297755	-0.0395256	0.005238	0.308185	-0.0668289	-0.202864	-0.186487	-0.162711	-0.0442848	0.0702924	0.0456436	0.0508181	0.123595	0.0198378	0.12539
ENSG00000031691	Q7L2Z9	CENPQ	1	0.161731	0.145336	0.571759	-0.55826	-0.448797	-1.06904	-0.5816	-0.197884	0.5949	-0.222243	0.663762	-0.00893761	-0.412106	-0.329995	1.08067	0.307099	0.870135	0.126998	0.197864	-0.451592	0.145982	-0.313151	0.32707	-0.599704
ENSG00000033170	Q9BYC5	FUT8	1	0.00936534	-0.14748	-0.343435	0.356808	0.0755471	-0.105925	0.123881	-0.273394	-0.0369621	-0.0823043	0.287424	0.381633	-0.0484437	0.204258	0.2738	0.191345	-0.318774	-0.557248	-0.157765	0.0511617	0.144376	0.0972808	0.00492281	-0.130071
ENSG00000033327	Q9UQC2	GAB2	8	-0.51011	-0.209042	0.0672192	-0.403255	0.390227	0.132471	-0.533418	-0.507719	-0.555036	-0.090827	0.80091	0.0745431	-0.343329	-0.723124	-0.377056	-0.365777	0.936397	-0.108611	0.426205	0.329027	-0.202619	0.309456	0.985475	0.477995
ENSG00000033627	Q93050	ATP6V0A1	9	0.128365	0.145706	0.391177	-0.0790303	0.227977	0.753006	0.0665984	0.26891	-0.0545635	0.336219	-0.141655	0.334483	0.0225341	0.215647	-0.232035	-0.144202	-0.284949	0.489048	-0.835198	-0.317398	-0.538657	-0.426856	-0.347372	0.022245
ENSG00000034510	P63313	TMSB10	9	-0.781061	-1.52393	-0.281096	-0.569239	-0.14666	0.00285304	-0.13593	0.545403	0.102378	0.317032	0.15549	0.252233	0.096217	0.653481	0.234516	0.212492	-0.230085	0.306753	0.280864	0.336262	0.565632	-0.0812564	-0.122133	-0.190213
ENSG00000034713	P60520	GABARAPL2	7	-0.289047	0.110536	-0.122292	-0.60572	0.0439156	-0.128997	0.0994956	0.387416	0.41988	0.515921	-0.242578	0.0513414	-0.0517695	0.757888	0.282538	0.324309	-0.523662	0.178875	-0.675731	-0.0432066	-0.0112811	0.00247602	-0.456971	-0.0233349
ENSG00000035403	P18206	VCL	1	0.103336	-0.382264	0.487013	0.299123	0.083281	-0.0827293	-0.316717	-0.364199	-0.213582	-0.494464	0.260313	0.470192	-0.0307776	-0.341031	0.0894991	0.221297	0.223052	-0.040424	-0.264535	0.00456611	-0.168146	-0.0408261	0.408622	0.0893998
ENSG00000035687	P30520	ADSS2	5	-0.27928	-0.122064	0.0890936	-0.0444698	0.139119	0.0945926	0.144814	0.270008	0.115556	0.47552	-0.540894	0.153418	0.12146	0.29554	-0.264305	0.353366	-0.0333063	0.0158785	-0.531721	-0.0861783	-0.0935162	0.0307501	-0.342836	0.0394553
ENSG00000035862	P16035	TIMP2	9	-0.972054	-1.7785	0.16636	-0.151889	0.131836	0.0127779	0.140371	0.86703	0.14141	0.903072	-0.381559	0.248194	0.00823909	0.541953	-0.144861	0.0128056	-0.487839	0.375348	0.37441	0.323341	0.0262476	-0.285062	-0.265792	0.19416
ENSG00000035928	P35251	RFC1	1	0.491662	-0.10354	0.0566822	-0.00229611	-0.247421	-0.287998	0.733269	0.274372	0.316039	-0.568463	0.064379	-0.0975236	0.315391	-0.267509	0.36148	0.132601	-0.286633	-0.158047	0.211579	-0.304521	-0.00201627	-0.442416	-0.0738225	-0.115249
ENSG00000036054	Q9NUY8	TBC1D23	2	-0.150556	-0.374782	0.182698	-0.640097	0.181725	-0.395746	-0.346575	0.0250915	0.194199	-0.182578	0.140824	0.00846906	-0.0136737	0.0711126	0.0138683	0.312878	0.134704	0.0598601	0.0321224	0.0242597	0.370681	0.154604	0.0497426	0.147167
ENSG00000037474	Q08J23	NSUN2	6	-0.00601233	0.139761	-0.258053	0.0267848	-0.242744	-0.0310104	0.0323682	-0.0389028	-0.0678638	-0.358288	0.179821	-0.0126039	0.0795748	0.0519541	0.122946	0.117836	0.075296	-0.136435	0.0981648	0.226347	0.0501251	0.0961807	-0.0617298	-0.0835168
ENSG00000038002	P20933	AGA	6	-0.270607	0.204966	-0.00329915	0.0441373	-0.41905	-0.495175	0.153701	-0.394044	0.171299	0.00313045	0.0653748	0.469785	-0.148247	0.228471	0.25743	0.204507	0.252194	0.0593499	0.0785842	-0.00728195	-0.671723	0.146169	0.255211	-0.184883
ENSG00000038219	Q8NFC6	BOD1L1	6	-0.161018	-0.119396	0.242711	-0.505609	-0.054107	0.00278389	0.063065	0.318609	-0.199056	-0.0807269	-0.085408	0.254893	-0.0384014	0.121748	-0.201807	0.224734	-0.0491839	0.25067	-0.202334	0.107089	-0.115641	0.140641	-0.0783008	0.164044
ENSG00000038274	Q9NZL9	MAT2B	1	-0.0886887	0.43321	0.525422	0.591606	0.20292	0.123237	0.215965	0.475324	0.559655	-0.564515	0.100011	-1.16075	1.09473	-0.332503	0.282138	0.233306	-0.0868761	-0.627303	-0.363192	0.177427	0.176114	-0.40025	-0.818085	-0.748903
ENSG00000038358	Q6P2E9	EDC4	9	-0.248316	0.00432271	0.088255	-0.0414212	0.118765	-0.143068	-0.118394	0.0901088	-0.109187	-0.00951985	-0.100679	0.101272	0.0692134	0.0138073	-0.116985	-0.0241459	0.0452907	0.0564297	0.0510424	0.0154467	-0.0924734	0.219097	-0.0125672	0.143706
ENSG00000038427	P13611	VCAN	6	-0.318607	-0.109484	-0.456071	-0.203915	-0.549914	-0.465939	0.0863936	-0.210476	-0.00929019	-0.151241	0.0205575	-0.0405121	-0.082407	-0.440218	0.230299	0.518393	0.0669845	0.148907	-0.0432772	0.64442	0.083008	0.613623	0.204707	0.464058
ENSG00000039523	Q6ZS17	RIPOR1	9	-0.0243841	0.136248	0.0917348	-0.0196736	0.327467	0.0252256	-0.0822471	-0.0394747	0.0414747	0.214396	-0.159217	-0.128372	-0.299959	-0.0284952	-0.304302	0.155445	-0.057521	0.747642	-0.502851	-0.00990323	-0.417152	0.0682645	0.093984	0.171668
ENSG00000039560	Q9P0K7	RAI14	3	0.0917544	0.157396	0.0587855	0.168216	-0.0541956	0.23485	0.375261	-0.0871515	0.204684	-0.100502	0.169572	-0.311103	0.172461	0.00846046	0.0672132	-0.00435783	0.0844138	-0.22491	0.0552699	-0.32226	-0.0971195	-0.164061	-0.244067	-0.23861
ENSG00000039650	Q96T60	PNKP	5	0.202973	0.0379696	0.125576	0.390034	-0.127502	-0.427884	0.107246	0.161236	-0.200702	-0.0955008	0.0953492	0.202783	0.171612	0.0713895	-0.0257514	-0.385289	0.129996	-0.117201	-0.143684	-0.265173	-0.14301	-0.150039	0.285764	0.0998072
ENSG00000040275	Q96EA4	SPDL1	1	0.398815	0.660903	-0.0537457	0.162559	-0.365316	-0.495999	0.177011	-0.0748877	-0.0542569	-0.295324	0.28519	-0.134543	0.225408	-0.338996	0.489763	-0.0326755	0.168679	-0.084256	0.130506	-0.229198	0.0617943	-0.32982	-0.0964203	-0.17519
ENSG00000040933	Q96PE3	INPP4A	9	-0.0931545	0.333304	-0.149389	0.138417	0.118653	-0.135696	-0.260673	0.125327	-0.10237	0.252934	0.0165124	-0.0520941	0.0627524	0.295236	0.166528	-0.306292	-0.0495962	-0.155577	-0.147582	-0.161568	-0.110022	0.137885	0.114496	-0.038032
ENSG00000041982	P24821	TNC	2	-0.114803	0.431108	0.484985	0.0247948	0.681793	0.167014	0.0183293	-0.520393	-0.188637	-2.39416	-0.303234	-1.10736	-0.114739	0.760502	0.0962249	0.648737	-0.203718	0.0557498	0.453097	0.490075	0.091077	0.653791	-0.112025	0.00178772
ENSG00000042088	Q9NUW8	TDP1	1	0.307328	0.248545	0.248415	0.424261	-0.369162	-0.413173	0.196894	-0.124361	0.00677729	-0.171815	-0.32622	0.17706	0.198148	0.08088	-0.274	-0.0494239	0.378894	-0.0961203	0.212407	-0.150625	-0.253448	0.305709	-0.242534	-0.314435
ENSG00000042429	Q9NVC6	MED17	5	-0.121064	-0.0779063	-0.412697	-0.174315	-0.386789	-0.179202	-0.0614843	-0.0125596	-0.055615	-0.0659005	0.162739	0.0995939	-0.0697981	-0.0470814	0.23033	0.258346	0.04348	0.08579	0.372997	0.220618	0.0603624	-0.0105662	0.14381	-0.00308675
ENSG00000044115	P35221	CTNNA1	1	-0.326122	-0.133265	-1.30667	0.11408	-1.09922	-0.863147	0.398676	-0.608513	0.437018	-0.351364	0.703857	-0.908019	0.298117	-0.819445	1.09661	0.0983967	0.999434	-0.720905	0.783123	0.13824	0.849814	0.545126	0.861438	-0.187258
ENSG00000044524	P29320	EPHA3	6	0.181172	-0.254558	-0.611124	0.0173151	-0.421169	-0.442487	0.463648	-0.450232	0.37866	0.496531	0.213285	-0.0617208	0.133344	-0.127384	0.189763	0.10607	0.0367194	-0.00710176	0.208181	0.0470425	-0.0907168	-0.025567	0.0483547	-0.0280263
ENSG00000046653	Q13491	GPM6B	2	0.191078	-0.410785	-0.000548525	0.119564	0.0121685	-0.0437906	-0.161714	0.0153789	-0.00071507	0.034887	0.297605	-0.0775429	-0.0890916	0.176056	0.1136	-0.246902	0.0551985	-0.329583	0.256629	-0.0762407	0.157502	-0.297312	0.261048	0.04351
ENSG00000047056	Q9Y2I8	WDR37	9	-0.418438	-0.193348	0.167825	-0.262748	0.262246	0.132063	-0.0644388	0.411372	-0.333699	0.638054	-0.335332	0.22031	-0.127852	0.253018	0.0981731	0.42716	-0.0564884	0.13497	-0.0794817	0.42068	-0.541635	-0.0595459	-0.60625	-0.0866149
ENSG00000047188	Q9H6S0	YTHDC2	5	0.123049	-0.131559	0.131143	-0.296034	0.0549011	0.304944	-0.0943513	-0.235823	-0.0207865	0.0294555	-0.0616586	0.0660387	-0.175323	-0.216117	0.0407023	0.243358	-0.0371677	0.28639	0.00826467	0.0702123	-0.326306	0.225649	-0.159385	0.170404
ENSG00000047230	Q9NRF8	CTPS2	1	0.408465	0.429508	-0.198781	0.170548	-0.00512505	0.0528775	0.147101	-0.00440237	0.199458	0.0336805	-0.135309	-0.203228	-0.0920014	-0.0992476	0.233699	-0.110315	0.0483078	-0.00398197	-0.149174	-0.28744	-0.14894	-0.214067	0.0108618	-0.0824945
ENSG00000047249	Q9UI12	ATP6V1H	9	-0.0689601	-0.056298	0.186189	0.113751	0.683297	0.00515133	-0.234081	0.411382	0.0682426	0.395931	-0.0423858	-0.259834	-0.19279	0.304594	0.0629425	-0.0884549	-0.293755	-0.277905	-0.0384887	-0.231757	-0.112174	-0.138625	-0.0304866	-0.165485
ENSG00000047410	P12270	TPR	1	0.257026	0.00934595	0.106302	0.0977859	0.0988099	-0.173291	0.329501	0.0985796	-0.100052	-0.119922	0.0477751	-0.209539	0.334415	-0.0411017	0.0108776	-0.170806	-0.000416138	-0.116606	-0.0648368	-0.34029	0.0993743	-0.100776	0.0500796	-0.102235
ENSG00000047621	Q9NQ89	C12orf4	8	-0.0710884	-0.364298	0.353199	-0.472356	0.250432	0.262379	-0.367089	0.506543	-0.30783	0.599335	-0.254726	0.16495	-0.15378	0.30652	-0.15414	0.342447	-0.1991	0.33299	-0.335935	-0.194799	-0.174519	-0.0171546	-0.27965	0.22767
ENSG00000047644	Q9ULE0	WWC3	1	-0.0569206	0.234502	-0.260089	0.150846	-0.0938524	-0.0180568	0.171182	-0.347852	0.262927	-0.372231	0.399358	-0.30541	0.197284	-0.378406	0.308281	0.0104468	0.473241	-0.280385	0.178073	-0.37026	0.401122	-0.188183	0.14123	-0.256846
ENSG00000047849	P27816	MAP4	5	-0.672766	-0.623736	0.592386	-0.426749	0.641702	0.554696	-0.500201	0.665327	-0.0955234	0.642478	0.0799725	0.54865	-0.334671	0.416914	-0.186057	-0.0837463	-0.327898	0.0908623	-0.865367	-0.207989	-0.45002	0.651836	-0.184045	0.0739463
ENSG00000047932	Q9HD26	GOPC	8	-0.120918	-0.0670413	-0.0131301	-0.362105	-0.249194	-0.192199	0.114273	0.00307288	-0.223799	-0.0760967	0.0338488	0.13466	-0.0967159	-0.0455913	0.0321352	0.298251	0.173257	0.276881	-0.0172746	0.0705838	0.0153356	0.204837	0.0860091	0.020921
ENSG00000048052	Q9UKV0	HDAC9	1	0.0471014	0.0544328	-0.134059	0.290385	-0.396899	-0.205692	-0.362491	-0.117515	-0.0884959	0.0240199	0.168072	-0.198082	0.106394	0.209894	-0.203387	-0.101365	0.189011	-0.0619085	-0.165135	0.47748	0.375526	-0.0676681	-0.0504502	0.210831
ENSG00000048405	Q2TB10	ZNF800	1	0.294958	-0.114848	-0.547132	0.146833	-0.296189	0.104119	-0.27274	-0.513022	0.492864	-0.173815	0.0297897	0.161138	0.589573	0.100181	0.545163	0.0712371	-0.102779	-0.56103	-0.191154	0.0676998	0.301568	-0.0950224	0.153093	-0.190482
ENSG00000048540	Q8TAP4	LMO3	7	-1.07038	0.0823375	-0.297253	-0.152255	0.0521236	-0.0574062	0.0971038	-0.0593512	0.202661	0.189889	-0.305149	0.393352	0.0837962	-0.304369	0.276116	0.742076	-0.138641	0.265597	-0.777738	-0.121592	-0.108055	0.392764	0.138095	0.476281
ENSG00000048740	O95319	CELF2	9	-0.230298	-0.193064	0.383729	-0.176747	0.0456135	0.092888	-0.106832	0.134379	0.0500424	0.0637816	0.340516	0.133409	-0.0240932	0.243277	0.000591188	-0.532849	0.320817	-0.57925	0.166562	0.065518	-0.0524772	-0.100799	0.129737	-0.174451
ENSG00000048828	Q9NZB2	FAM120A	2	0.0992365	0.110759	-0.170138	0.138068	-0.504098	-0.412305	0.673729	-0.165375	0.261046	-0.166754	-0.162126	-0.170482	0.263297	-0.552712	0.340019	0.196342	0.00449906	-0.0744363	0.248421	0.0354343	0.372921	-0.0848364	-0.112679	-0.167831
ENSG00000049239	O95479	H6PD	1	0.536854	0.609385	-1.0853	0.405701	-0.126233	0.00795246	0.536038	-0.974266	0.465811	-0.902627	0.149043	0.536964	-0.00740462	-0.667596	0.161157	-0.602493	0.0884619	-0.982959	0.340937	0.414356	0.478587	-0.00275421	0.604968	0.0154182
ENSG00000049449	Q15293	RCN1	1	0.25773	0.576045	-0.158625	0.117645	0.0154413	0.28804	-0.180066	-0.810682	0.0707843	-0.695197	-0.407227	0.514777	0.233056	0.729642	-0.0632438	0.36967	-0.282088	0.350413	-0.172436	-0.382684	-0.0733531	-0.0160085	-0.275282	-0.00635171
ENSG00000049541	P35250	RFC2	1	0.371776	0.439529	0.515242	0.431247	-0.253233	-0.0689097	0.2991	-0.598329	0.0492609	0.112964	-0.222015	-0.656122	0.00083405	0.38892	-0.196782	-0.398598	0.0815044	-0.233714	0.0646657	-0.153454	0.202598	0.122919	-0.231666	-0.0677369
ENSG00000049618	Q8NFD5	ARID1B	8	-0.330286	-0.416241	-0.172961	-0.140961	0.317332	0.116143	-0.0611974	0.211181	-0.138693	0.261975	0.0225753	0.21473	0.0452564	-0.0124333	-0.301191	-0.0389904	-0.176062	-0.0167218	0.230194	0.183426	0.0113474	0.18005	-0.140238	0.151767
ENSG00000049759	Q96PU5	NEDD4L	6	-0.242805	-0.377919	0.0645795	-0.289504	-0.0468807	0.267523	-0.032552	0.0354481	-0.00695985	0.0298853	0.330118	0.395271	-0.0823444	-0.0687992	0.0611523	-0.116365	-0.0137534	-0.0896767	0.298169	0.318319	-0.125856	-0.116939	-0.0988898	-0.0912197
ENSG00000049769	Q6ZSY5	PPP1R3F	8	-0.564551	-0.744626	0.279577	-0.0801492	0.472632	0.0337558	-0.258457	0.0142236	-0.389956	0.0840922	-0.0347962	-0.173481	-0.00744734	0.294299	-0.0984127	-0.0104287	0.209908	0.108649	0.0590577	-0.309548	-0.0531591	0.21273	0.503578	0.45251
ENSG00000050393	Q96AQ8	MCUR1	9	0.504876	-0.113552	0.432376	-0.439001	0.0327908	-0.23658	-0.254245	0.230709	-0.0137523	0.178041	0.0447263	0.202463	0.112294	0.194148	-0.0453899	0.361047	0.0407877	-0.119624	-0.424269	-0.290446	0.0687747	0.0916367	-0.30921	-0.248599
ENSG00000050405	Q9UHB6	LIMA1	2	0.350226	0.521602	-0.542214	0.275642	-0.197392	-0.134673	-0.072899	0.38422	0.154506	-0.111976	0.28074	-0.243185	-0.328878	0.348203	0.227338	-0.264292	0.061835	-0.139205	0.0163983	-0.40822	-0.0342392	0.0989407	0.128787	-0.371265
ENSG00000051128	Q9NSC5	HOMER3	2	0.289393	0.407245	-0.0901457	0.0502333	0.136435	0.40744	0.290043	-0.526614	0.249641	-0.525484	0.0787944	-0.737692	0.38041	-0.247872	-0.0793433	0.00782822	0.077386	-0.242921	0.23723	0.270549	0.25895	-0.403054	0.201407	-0.48986
ENSG00000051596	Q96J01	THOC3	4	0.694592	0.0711068	0.540869	0.633123	-0.0517557	0.561978	0.329785	0.0184846	-0.106302	0.199945	-0.755891	0.498424	-0.0235269	0.304713	-0.206142	-0.445075	-0.0247413	0.00338882	-0.161995	-0.593038	-0.26852	-0.618326	-0.379464	-0.221634
ENSG00000051620	Q9Y5Z4	HEBP2	6	0.113451	0.348962	0.0696311	-0.146104	-0.512198	0.204434	0.257807	-0.70369	0.556741	0.0178012	-0.129654	0.0299736	0.227552	-0.794246	0.14102	0.402788	-0.152526	-0.0194443	-0.222988	0.0491643	0.042951	0.0367577	-0.244885	0.426702
ENSG00000052749	Q5JTH9	RRP12	5	0.112312	-0.190439	-0.229761	0.0933118	-0.493039	-0.616078	0.542797	0.403465	-0.00978295	0.117201	-0.0336282	0.108955	0.417246	0.349124	-0.229263	0.0580336	0.036024	0.117882	-0.119529	0.066715	-0.00114562	-0.426864	0.00299449	-0.0765336
ENSG00000052795	Q9P278	FNIP2	7	-0.530745	-0.741282	0.585585	-0.845006	1.05582	0.678871	-0.519906	-0.109944	-0.278171	-0.0970835	-0.0726722	0.474417	-0.605479	-0.160686	-0.449225	0.174119	-0.112281	0.299446	-0.188339	0.57558	-0.231975	0.475767	0.0670339	0.556154
ENSG00000052802	Q15800	MSMO1	4	-0.00284851	0.03406	0.395153	-0.243682	-0.307432	-0.129228	0.00283888	-0.101318	0.0289416	0.203373	-0.304319	-0.0134237	0.235074	0.173161	-0.127458	0.732349	-0.0501418	0.338276	-0.411677	0.118142	-0.211547	-0.126749	-0.266493	0.0349474
ENSG00000053371	O43488	AKR7A2	1	0.100652	0.652805	-0.141158	0.552154	-0.797475	0.322876	0.297553	-0.235691	0.814322	0.119975	-0.243595	-0.512122	0.407205	-0.254492	0.777689	-0.0834212	-0.32595	-0.615431	0.157099	-0.219404	0.308645	-0.15115	-0.356585	-0.574501
ENSG00000053372	Q9UKD2	MRTO4	5	0.229707	-0.00413389	0.0577933	0.0108052	-0.283945	-0.152653	0.390402	0.072232	-0.0167996	-0.0361055	-0.11556	0.0114271	-0.0652674	-0.0420182	-0.104945	-0.141593	-0.0995215	0.0394157	0.117485	0.0394969	0.0146382	-0.138428	-0.00652769	0.224095
ENSG00000053501	Q9NZ43	USE1	2	-0.0421123	-0.250676	-0.00697278	0.219585	0.0218984	-0.333295	-0.227144	-0.511742	-0.0547617	-0.262146	0.37126	-0.0742506	0.0719724	-0.0512923	0.282728	-0.304476	0.498357	0.0950624	0.0616121	-0.47352	-0.0144008	0.189616	0.422746	0.371953
ENSG00000054523	O60333	KIF1B	5	-0.00831174	-0.0715394	0.465835	0.27639	0.319431	0.165374	-0.519246	0.158874	-0.0488422	-0.0194438	0.452257	0.252665	0.0908646	0.262356	-0.335474	-0.540699	0.0807248	-0.448685	0.0942521	-0.195383	-0.0481344	-0.173789	-0.0276904	-0.181784
ENSG00000054654	Q8WXH0	SYNE2	1	0.852839	0.446182	0.726862	0.774436	0.107894	-0.839121	-1.31857	-0.365654	-1.00604	-0.301217	1.28111	0.724007	-0.639615	0.393574	-0.109663	-0.73653	0.057298	-0.57826	0.0538722	-0.466322	0.131423	0.51949	0.183773	0.108234
ENSG00000054793	O75110	ATP9A	9	-0.437699	-0.532585	0.347796	0.0658525	0.307579	0.137139	-0.17029	0.753269	0.369161	0.719671	-0.368476	0.16443	0.0362552	0.820162	-0.21667	0.200814	-0.462802	0.0471183	-0.0175891	0.232743	-0.569963	-0.353423	-0.743997	-0.328494
ENSG00000054983	P54803	GALC	7	0.0429187	0.21492	0.125753	0.527467	0.747875	0.34344	0.128272	-0.103264	-0.109372	0.301476	-0.258466	-0.520559	0.292237	-0.210973	0.522345	0.367165	-0.000184877	-0.121501	-0.642169	-0.324248	-0.14143	-0.278156	-0.459671	-0.443876
ENSG00000055044	Q9Y2X3	NOP58	5	0.288923	0.12943	-0.0145597	0.0295345	-0.0410719	-0.117514	0.0616162	-0.0382842	-0.124215	0.00667055	-0.0422507	0.0476278	0.136796	0.0728671	-0.145565	0.017567	-0.047997	-0.0856312	-0.0843254	-0.0137011	-0.0128846	0.0401811	-0.10105	0.0378358
ENSG00000055070	Q7Z422	SZRD1	1	0.303505	0.0237772	-0.621524	0.381557	-0.530078	-0.294296	0.5484	-0.398193	0.211877	-0.402461	0.183641	-0.066587	0.438714	-0.566449	0.196167	-0.108933	0.0413509	-0.31975	0.567611	0.0403358	0.27614	-0.132507	0.243238	-0.0155358
ENSG00000055130	Q13616	CUL1	3	-0.0934371	-0.00478538	0.103582	0.133097	-0.147592	-0.112776	0.189378	0.0768059	-0.0806062	0.164947	0.0208084	-0.00156265	0.272387	0.270993	-0.167103	0.0539826	0.0732003	0.00843043	-0.359206	-0.154293	-0.128577	-0.150795	-0.122468	0.15559
ENSG00000055163	Q96F07	CYFIP2	9	0.32258	-0.278216	0.368234	0.0418084	-0.00913234	-0.122326	0.330093	0.39336	0.0877234	0.162473	-0.395267	-0.143843	0.0603398	0.363873	-0.242802	-0.291294	-0.0495867	0.0274024	-0.090846	-0.171073	-0.22133	0.130675	-0.108052	-0.164796
ENSG00000055332	P19525	EIF2AK2	1	0.214363	0.082907	0.105836	-0.153507	-0.311209	0.37467	-0.0275243	-0.685232	0.0763958	-0.0335553	-0.135223	-0.0421987	0.202753	-0.145609	-0.237986	-0.303933	0.274745	-0.319779	0.622599	-0.0119058	0.423065	0.257346	0.161464	-0.388482
ENSG00000055609	Q8NEZ4	KMT2C	2	0.0527525	-0.587201	0.00877301	-0.116311	-0.0969589	-0.279014	-0.239265	-0.0886314	-0.0570673	-0.0973774	0.545126	0.44249	-0.0372239	0.162057	-0.0181176	-0.146751	-0.0843269	-0.160635	0.148095	0.145417	0.0615812	0.280293	0.123793	0.0385022
ENSG00000056277	Q8ND82	ZNF280C	1	0.334915	0.152807	-0.180527	-0.0451654	-0.162511	-0.217193	0.125215	-0.165507	-0.050995	-0.0971552	-0.0110945	-0.147885	0.395026	-0.298958	0.0739206	0.0977505	-0.0656315	0.101282	0.0613193	0.115908	0.145493	0.230576	-0.398952	0.00736221
ENSG00000056586	Q9HBD1	RC3H2	8	-0.0955923	-0.223695	0.692531	-0.106057	0.12799	-0.129752	-0.512188	0.223563	-0.270857	0.00219817	0.318563	0.670421	0.0153151	0.457194	-0.344783	-0.424886	-0.314224	-0.0341948	0.0452736	0.139616	-0.120434	-0.103688	0.048508	-0.0608219
ENSG00000057252	P35610	SOAT1	1	0.211998	-0.63124	0.153847	0.0927663	0.14776	-0.151463	0.0996969	0.260192	0.0873595	0.266361	0.271532	-0.112917	0.0877429	0.206043	0.0477558	-0.138481	0.309355	-0.329846	-0.205127	-0.204835	-0.0292815	-0.118193	0.00600824	-0.327034
ENSG00000057608	P50395	GDI2	1	0.211615	0.368605	-0.0210015	0.394468	0.0433032	-0.100084	0.290046	0.0659184	0.203398	0.052513	0.0896424	-0.0251448	0.435191	0.101699	-0.0481589	-0.144549	0.0814347	-0.124801	-0.25105	-0.740015	-0.111217	-0.402207	-0.036383	-0.333221
ENSG00000057757	Q9GZP4	PITHD1	9	-0.285703	-0.382507	0.4208	-0.532345	0.544991	0.436985	-0.522468	0.418777	-0.460041	0.422807	-0.452479	0.273695	-0.442449	0.400507	-0.273586	0.08563	-0.331699	0.398379	-0.362435	0.392607	-0.39422	0.347785	-0.219906	0.516876
ENSG00000058056	Q92995	USP13	2	-0.312862	-0.171579	0.0386445	-0.010863	-0.207753	-0.336995	0.0167315	0.372948	-0.0963303	0.11915	0.597983	0.0102623	0.0823664	0.176292	-0.215139	-0.313806	-0.172363	-0.341563	0.189856	0.195381	0.241647	-0.13862	0.242602	0.034013
ENSG00000058404	Q13554	CAMK2B	9	0.308176	-0.133928	-0.0701628	-0.301598	0.227419	-0.0961509	0.0742951	-0.101522	-0.389067	0.134639	-0.209719	-0.142833	0.123459	-0.106423	0.727226	0.179238	-0.643756	0.0469244	0.706302	0.38799	-0.395253	-0.122322	-0.211719	0.00878542
ENSG00000058453	Q5TZA2	CROCC	5	-0.302643	0.283078	-0.241804	0.332968	-0.22159	0.225657	0.00532106	-0.329538	-0.0810913	-0.333136	-0.0126751	-0.137474	0.0801723	-0.30057	-0.166119	0.0704214	0.330141	-0.141564	0.0328234	0.0700307	0.20341	0.200321	0.220536	0.213322
ENSG00000058668	P23634	ATP2B4	3	0.0676241	0.344835	-0.215067	0.356363	-0.201479	0.0776586	0.278045	-0.412375	0.383838	-0.185028	0.301794	-0.352685	0.179436	-0.159076	-0.0104682	0.00819007	0.19001	-0.493895	-0.0068959	-0.156362	0.107211	-0.030505	0.297185	-0.368352
ENSG00000058804	Q9BTX1	NDC1	1	0.358276	0.0706736	0.213805	0.203649	0.26543	-0.375979	-0.0597939	-0.0447765	0.12952	0.0386813	-0.560508	0.126037	0.397885	0.221958	0.126143	-0.155673	-0.491829	-0.0444807	0.308528	-0.0907571	-0.0753113	-0.196964	-0.333882	-0.0306308
ENSG00000059573	P54886	ALDH18A1	1	0.035273	0.583879	-0.757795	0.408712	-0.694629	-0.422604	0.415433	-0.0180802	0.0838658	0.122537	-0.111864	0.0331651	0.373397	-0.0100454	0.0357205	0.33806	0.013762	-0.00075109	0.0144277	-0.0855604	0.0622496	-0.0842061	-0.256987	-0.0779604
ENSG00000060138	P16989	YBX3	1	0.775174	0.540863	-0.158262	-0.0374401	0.307244	0.0506025	0.479297	-1.40827	-0.230091	-0.508456	-0.620214	0.954702	0.152835	-0.362031	-0.203626	0.428411	-0.134386	-0.22147	-0.168772	-0.40877	0.228891	0.417621	0.219684	-0.0935369
ENSG00000060237	Q9H4A3	WNK1	5	0.0626708	-0.0255985	-0.287384	0.130373	-0.105562	-0.237761	-0.114749	-0.301881	-0.0962134	-0.311086	0.193845	0.0805796	-0.0024497	-0.213913	-0.117161	-0.00918226	0.206399	0.0540663	0.0394631	0.00256659	0.140725	0.350878	0.295651	0.265726
ENSG00000060491	Q9NZT2	OGFR	5	-0.225827	0.00907599	-0.30655	-0.0639257	-0.0844987	-0.250661	0.162369	0.218942	0.0634507	-0.0737956	-0.0118298	0.277678	0.10888	-0.160507	-0.00598013	0.134297	0.085613	0.0416192	-0.313741	-0.0940014	0.0172824	0.470812	-0.0376202	0.0389177
ENSG00000060971	P09110	ACAA1	5	-0.240139	0.101776	0.214976	-0.0340608	-0.0588827	0.0610962	-0.0972447	0.0678748	0.133424	0.0537086	-0.207665	0.0558606	0.121821	0.110374	0.122222	0.0320403	0.00237243	-0.0371172	-0.306007	-0.176981	-0.0752042	0.119469	0.0728836	-0.0365969
ENSG00000060982	P54687	BCAT1	4	0.988272	0.297168	-0.0230201	1.08072	-0.241753	-0.195801	0.148595	-0.0998986	0.145716	-0.642415	0.902759	0.295425	-0.235798	-0.186945	-0.414723	-0.796712	0.19239	-0.338665	0.263851	-0.0409972	0.170202	-0.758374	-0.154859	-0.355137
ENSG00000061794	P82673	MRPS35	9	0.0776806	-0.0811728	-0.056793	0.0803177	-0.0433964	0.0262869	-0.0847246	-0.0632982	-0.290334	0.122427	0.202503	0.301749	0.123232	0.448137	-0.140344	0.0398327	-0.231396	0.137294	-0.300533	-0.16223	0.047923	-0.268829	-0.330276	0.445942
ENSG00000061918	Q02153	GUCY1B1	7	-0.207223	0.307711	0.291449	-0.135148	0.0653956	0.0687034	0.361187	-0.48808	0.115344	0.159077	-0.0244245	0.0766983	0.416609	0.0225749	0.778175	-0.34091	0.324129	0.00472437	-0.336044	-1.00753	0.108611	-0.668615	0.341341	-0.233758
ENSG00000062598	Q96JJ3	ELMO2	8	-0.0589577	-0.109695	-0.176196	-0.232586	-0.209257	-0.183613	0.00871952	0.0588735	-0.0192443	0.212811	-0.0232739	-0.103265	-0.0733733	0.117006	0.0428222	0.428922	0.123145	0.417653	-0.281799	-0.0940788	-0.0103799	0.152993	-0.0993064	0.112081
ENSG00000062650	Q7Z5K2	WAPL	1	0.155546	0.147846	-0.357113	0.320849	-0.218709	-0.370995	0.187966	-0.400228	0.294193	-0.288227	0.10506	-0.0019329	0.316933	0.00226169	0.141071	-0.350177	-0.120798	-0.0344077	0.232789	0.0944235	0.0522308	-0.077275	0.205136	-0.0364414
ENSG00000062822	P28340	POLD1	1	0.197139	0.203293	-0.686819	-0.0962445	-0.333622	-0.178614	-0.0277869	-0.254754	0.14595	0.607807	-0.057985	-0.759035	0.435668	0.565776	-0.0743209	-0.508079	0.432758	-0.464768	0.219432	-0.0780688	0.379295	0.0354467	0.249742	0.0477906
ENSG00000063015	Q53EL9	SEZ6	8	-0.175094	-0.100811	0.449006	-0.153083	0.437865	0.342254	-0.257658	0.00893683	-0.02153	0.282979	0.092406	0.100984	-0.0495956	0.0616691	-0.193941	-0.0358339	-0.142845	-0.0778196	0.0143076	0.0527728	-0.279353	-0.234704	-0.0474546	-0.0734593
ENSG00000063046	P23588	EIF4B	5	-0.193931	0.226683	-0.357593	0.048668	0.245049	-0.327748	-0.0857817	0.0997292	-0.137197	0.134004	0.353771	0.0102269	-0.115334	-0.0921958	-0.183778	-0.328128	0.345292	0.112462	-0.0788039	-0.432153	0.236368	-0.201421	0.565268	0.156542
ENSG00000063245	Q9Y6I3	EPN1	9	-0.229794	-0.26987	0.494457	-0.388282	0.213649	0.180015	-0.415784	0.726296	-0.214541	0.720356	-0.511272	0.294786	-0.113044	0.428856	-0.563449	0.0627095	-0.27776	0.287268	-0.40599	-0.0678799	-0.12515	-0.0411463	-0.110602	0.326172
ENSG00000063660	P35052	GPC1	1	0.373092	0.55583	-0.507302	0.880732	-0.594984	-0.585185	0.842346	-0.0238519	0.707605	0.129963	0.0961855	-0.348831	0.866788	-0.150239	0.473603	-0.196988	-0.13013	-0.260353	-0.469087	-0.739949	-0.253079	-0.194516	-0.221945	-0.249706
ENSG00000063854	Q16775	HAGH	9	-0.267338	-0.248833	0.48205	-0.0657017	0.263477	0.648628	0.286534	0.553783	0.185459	0.292698	-0.588236	-0.238109	-0.160858	0.680331	-0.151161	-0.108184	-0.442565	0.0967271	-0.412593	-0.110304	-0.123868	-0.213713	-0.0873245	-0.270901
ENSG00000064042	Q9UPQ0	LIMCH1	9	-0.0886158	-0.559977	-0.26534	-0.102019	-0.570674	-0.154098	-0.290367	0.208327	0.290937	0.0539185	0.200728	0.160699	-0.109238	0.566624	-0.290605	-0.0565497	0.182931	-0.0455136	-0.446631	0.0930726	0.328917	0.180679	0.428784	0.284013
ENSG00000064490	O14593	RFXANK	1	0.435374	0.433548	-0.116918	0.733817	0.24747	-0.925479	0.343834	0.0459189	0.764338	-0.130774	0.311641	-0.702206	0.98134	-0.715404	0.483551	-0.0664973	-0.0876829	-0.507178	-0.364402	-0.516537	0.470572	-0.137332	-0.225521	-0.755472
ENSG00000064607	Q8IX01	SUGP2	9	0.0214937	0.00939153	0.164468	-0.169488	0.354694	0.139928	-0.321647	0.0725412	-0.259229	-0.0390696	0.0209525	0.158303	-0.121809	0.111838	-0.0397336	0.10842	-0.0695734	-0.0318519	-0.250805	-0.0258537	0.0946551	0.279918	-0.244705	0.0371634
ENSG00000064666	Q99439	CNN2	5	-0.0962923	0.119957	0.0839544	-0.182501	-0.256042	0.0238002	-0.271344	0.056557	-0.0480526	-0.0427519	0.182322	0.15917	-0.211874	-0.215401	0.127424	0.465072	0.303171	0.257989	-0.604615	0.105412	-0.24244	0.145684	0.0260216	0.114779
ENSG00000064692	Q9Y6H5	SNCAIP	2	0.200028	0.505659	-0.361178	-0.078511	-0.369137	0.0230555	0.0328264	0.00613121	-0.00249163	0.0930995	-0.00203388	-0.179377	0.0715531	-0.255361	0.0832219	0.0998241	0.100103	0.079418	-0.0455293	0.141389	-0.163871	0.0193567	0.0213851	-0.0195601
ENSG00000064961	Q9P0W2	HMG20B	1	0.163768	0.444023	-0.13231	0.208196	-0.142059	-0.0491733	-0.120779	0.30035	0.176207	-0.0790024	-0.330405	-0.462451	0.155552	0.061139	-0.152458	0.0040314	0.0939452	-0.442796	0.102156	0.144086	0.123716	0.578458	-0.426364	-0.217832
ENSG00000065060	Q6BDS2	UHRF1BP1	2	0.0996524	0.161439	-0.358512	0.0882322	0.0808444	-0.19216	-0.118552	-1.14016	-0.0362044	-0.935496	0.904484	0.283568	0.109774	-0.785754	0.0485167	-0.00195835	0.982168	0.14938	0.33854	-0.407985	0.206182	-0.319419	0.595577	0.24784
ENSG00000065150	O00410	IPO5	1	0.136435	0.209691	-0.0997325	0.186189	-0.203313	-0.188587	0.0588778	0.35223	0.0803748	0.141186	-0.210793	-0.00651926	0.193065	0.170376	-0.103586	0.024476	-0.273504	0.196241	-0.293364	-0.275375	0.0128994	-0.0350841	-0.212319	0.140136
ENSG00000065154	P04181	OAT	6	-0.327224	-0.371645	0.192329	-0.152977	0.138551	-0.0789145	0.200629	-0.0911253	0.0463277	-0.143553	0.12194	-0.355148	-0.0759319	-0.0533393	0.492499	0.145516	0.114044	0.226455	-0.032901	0.0851161	0.166709	-0.0335665	-0.172324	-0.0414653
ENSG00000065243	Q16513	PKN2	1	-0.0450658	0.375627	0.371296	0.0622587	-0.236569	-0.134424	0.542247	-0.350193	0.162839	-0.313448	0.290244	-0.153994	-0.08907	0.316709	-0.00955732	-0.576833	0.369362	-0.228646	-0.321852	-0.140161	-0.363757	0.0741021	0.437492	-0.0386046
ENSG00000065491	Q9NU19	TBC1D22B	4	-0.504918	-0.296371	0.0905388	-0.311055	0.0478312	0.163162	0.147679	0.435541	-0.0128277	0.177286	0.232918	-0.133488	-0.212492	0.0654409	0.04301	0.148368	0.0451053	-0.158449	-0.116486	0.136497	-0.0902113	0.0163971	-0.0648051	0.151328
ENSG00000065548	Q8WU90	ZC3H15	5	-0.176935	-0.316153	0.0590289	-0.307093	-0.0942995	-0.0820848	-0.0637313	0.232222	-0.239234	0.184765	-0.143166	0.271358	-0.0572514	0.177126	-0.186271	0.271415	0.0690301	0.323813	-0.283392	0.0940115	-0.0854961	0.120411	-0.0403072	0.272234
ENSG00000065559	P45985	MAP2K4	7	-0.115323	-0.0970136	0.424133	-0.0788662	0.3054	0.116015	0.186245	0.698498	-0.00373387	0.477806	-0.296313	0.377627	-0.198852	0.233687	-0.0757662	0.0919487	-0.0613603	-0.53518	0.0282371	-0.358483	-0.364418	-0.306198	-0.223814	-0.224275
ENSG00000065609	O60641	SNAP91	9	-0.201903	0.21918	0.0214452	-0.463336	-0.197675	0.296138	0.170034	0.480156	0.0471176	0.451984	-0.61884	-0.0639027	-0.397282	0.167181	0.453296	0.137008	-0.489247	0.293766	0.179915	-0.0606136	0.0194348	-0.333987	-0.107926	-0.00194421
ENSG00000065613	Q9H2G2	SLK	3	0.157789	0.166407	0.0283982	0.0728256	-0.159042	-0.00825721	0.0918363	-0.0838911	0.108996	0.0296514	0.17877	-0.074141	-0.0483978	-0.0140245	0.202694	0.184662	0.10678	-0.34505	0.00702417	-0.171505	0.0326476	-0.315747	-0.00218535	-0.146241
ENSG00000065809	Q9H098	FAM107B	9	-0.809532	-0.588036	-0.0808497	-0.483861	-0.294213	-0.72327	0.540515	-0.0757224	0.24448	0.249017	-0.120945	0.606674	-0.0191358	-0.378041	0.048183	0.0234808	0.372555	0.0276292	0.425833	-0.0725245	0.461199	0.226087	-0.153383	0.573859
ENSG00000065882	Q86TI0	TBC1D1	1	0.022901	0.585399	0.160905	0.222526	-0.220905	-0.0477096	0.270542	0.409361	-0.00572042	0.0642871	-0.388533	-0.0833245	-0.357859	0.0780488	-0.1172	-0.396127	-0.283833	-0.375088	0.398149	0.0859149	0.0364737	0.257871	0.0546438	-0.370721
ENSG00000065970	Q9P0K8	FOXJ2	8	-0.469219	-0.246677	0.0324827	-0.106824	0.0734957	-0.229148	-0.241384	0.0729697	0.158705	0.135088	0.0874374	0.0853874	-0.0101049	-0.0651607	-0.269957	0.0469761	0.0703999	0.131778	-0.0911318	0.16124	0.089512	0.184889	0.052767	0.346479
ENSG00000065978	P67809	YBX1	7	0.0564485	0.121018	-0.0143063	0.00454305	-0.535759	0.00705073	0.141927	0.816709	0.140977	0.944775	-0.730868	0.166915	0.19436	0.914059	-0.158984	0.0803233	-0.809559	0.113017	0.0780124	-0.308988	-0.0172471	-0.372898	-0.724543	-0.106983
ENSG00000066027	Q15172	PPP2R5A	3	0.415594	0.291254	-0.617951	0.30606	0.193031	-0.140406	-0.125855	0.239892	0.0893512	-0.176464	0.566847	-0.28884	-0.239598	-0.625454	0.420101	-0.233618	0.584916	-0.410839	-0.266815	-0.189385	0.204107	-0.555575	0.559016	0.000631094
ENSG00000066084	Q9P265	DIP2B	2	-0.214853	-0.361975	0.0714344	-0.0136652	0.108881	-0.144586	-0.199616	0.074263	0.0850112	-0.0523901	0.0949645	0.0784916	0.0479725	-0.0553365	-0.0699668	-0.146358	0.109362	-0.263111	0.264306	0.146741	0.191859	0.252378	-0.00170916	-0.00209803
ENSG00000066117	Q96GM5	SMARCD1	3	0.198385	-0.0818603	-0.0433084	0.189737	-0.0346406	-0.0628053	0.0614241	-0.043084	0.0188907	-0.0696158	0.11974	-0.000729534	0.0971536	-0.162855	-0.186428	-0.216255	0.0834527	0.067217	0.124863	-0.16821	0.051353	-0.0859733	0.190457	-0.0469085
ENSG00000066136	Q13952	NFYC	2	-0.225998	-0.242886	0.242017	-0.157313	-0.0384617	0.261285	0.0575314	0.399534	-0.145906	0.52322	-0.0617548	0.0416743	-0.138547	0.200981	-0.109998	-0.538983	0.210536	0.0703881	-0.127114	-0.1917	0.0998588	-0.140573	-0.0171886	0.0293964
ENSG00000066382	Q15777	MPPED2	1	-0.154089	-0.0749424	-0.134908	-0.334579	0.0208856	-0.43965	-0.0224482	0.212443	0.236115	0.234459	0.11307	-0.0335073	-0.206577	0.16938	0.138097	0.237725	0.0291186	0.258346	-0.216877	-0.129766	0.0685066	-0.00672473	-0.0337699	0.0696929
ENSG00000066455	Q8TBA6	GOLGA5	6	0.0947254	0.0562233	-0.269776	-0.0168602	-0.017137	-0.372504	-0.287838	-0.0278818	-0.251792	0.128791	0.375216	0.102761	-0.242713	-0.0558952	0.430217	-0.0231233	0.381637	-0.136375	-0.0733902	-0.014698	-0.0971534	-0.0722632	0.241523	0.148305
ENSG00000066629	O00423	EML1	7	0.15093	0.0380046	-0.232179	0.537722	0.0798517	-0.147993	0.225464	0.226004	0.318739	0.270392	-0.112719	-0.255058	0.426338	0.533726	-0.0986044	-0.154852	0.0382986	-0.300312	-0.225321	-0.203621	-0.248304	-0.205347	-0.252327	-0.408832
ENSG00000066651	Q7Z4G4	TRMT11	2	0.264536	0.369088	-0.0434547	-0.115273	-0.0915847	-0.196837	0.336497	-0.587373	0.277441	-0.130627	0.266773	-0.0383195	0.149283	-0.312559	0.159246	0.304666	-0.164164	0.00743925	0.14595	-0.0883535	-0.139792	-0.0615862	-0.141676	-0.16932
ENSG00000066654	Q9NXG2	THUMPD1	9	0.093541	0.183699	-0.18406	0.258157	-0.380327	-0.389375	0.0240194	-0.605103	-0.0021024	0.191394	0.358425	0.627477	0.280777	-0.374636	-0.525108	-0.104106	0.291301	0.0189476	-0.158476	0.0969302	0.00365383	0.31927	-0.268738	0.244439
ENSG00000066855	Q15390	MTFR1	5	-0.036058	-0.139314	-0.368537	0.328916	-0.761209	-0.482186	0.455799	-0.373259	0.424864	-0.113917	0.0784568	-0.336343	0.167879	-0.536094	0.245678	-0.0141908	0.42773	0.10024	-0.0467263	0.118823	0.176388	0.140828	0.450234	0.0919969
ENSG00000067057	Q01813	PFKP	2	0.402272	0.48408	0.0493801	0.412792	0.113141	-0.0266863	-0.10065	-0.808789	0.194543	-0.938806	0.0656058	0.0316011	-0.315017	-0.651843	0.156614	-0.15769	0.15582	-0.185681	0.635345	0.375215	0.0662999	-0.0166208	0.230439	-0.171363
ENSG00000067064	Q13907	IDI1	4	0.243649	0.423823	0.472808	-0.0247733	0.361559	0.20946	0.126399	0.314206	-0.0469783	0.292799	-0.405191	-0.132375	0.0830499	0.518706	-0.294286	0.130615	-0.397226	-0.0659983	-0.326574	-0.396322	-0.216069	-0.40211	-0.428471	-0.0406988
ENSG00000067141	Q92859	NEO1	7	-0.027345	0.0832732	0.120463	0.265365	-0.0323591	0.1467	-0.0705373	-0.0452625	0.124179	0.048818	0.195729	0.0627395	0.218289	0.054153	-0.0541876	-0.088528	-0.130883	-0.0953543	0.0173996	0.0325484	-0.250724	-0.182256	-0.21735	-0.17487
ENSG00000067191	Q02641	CACNB1	9	-0.0176916	0.265314	0.42536	-0.288583	0.574116	0.274002	-0.354834	0.0494303	-0.283292	-0.102745	0.221421	0.0493152	-0.118753	0.14878	-0.0332542	0.12865	-0.3637	0.313541	-0.858677	0.162599	-0.104807	0.191831	-0.0399855	-0.23804
ENSG00000067225	P14618	PKM	1	0.0588727	-0.109025	0.347962	-0.14456	0.101423	0.314803	-0.013131	0.178156	0.021781	0.113813	-0.322264	-0.102025	-0.0277085	0.2814	0.0327018	-0.128882	-0.298207	-0.050176	0.0441271	0.270236	0.0170248	0.0456537	-0.475972	-0.156004
ENSG00000067248	Q7Z478	DHX29	9	0.0741936	0.0359885	0.199766	-0.132754	-0.206484	0.0853127	0.0886134	0.0478155	-0.0260929	0.0808079	-0.219116	0.161727	0.111057	0.27459	-0.0420677	0.183729	-0.153261	-0.00574671	-0.332908	0.107533	-0.186297	0.112732	-0.217975	-0.0411636
ENSG00000067334	Q5QJE6	DNTTIP2	5	0.109757	-0.149853	-0.140765	-0.221161	-0.295326	-0.200448	-0.0443243	0.0440047	-0.0460662	-0.148292	-0.00898004	0.20215	-0.140914	-0.153901	-0.117302	0.0105075	0.215551	0.169603	0.210243	0.163809	0.120503	-0.0755293	0.157585	0.339148
ENSG00000067369	Q12888	TP53BP1	7	0.134378	-0.034152	0.689864	0.0859165	0.600246	0.342198	-0.180853	0.431827	-0.235931	0.284519	-0.189366	0.00103351	0.052959	0.47489	-0.32182	-0.302405	-0.174221	-0.372543	-0.450681	-0.1966	-0.185216	0.0129438	-0.209301	-0.257685
ENSG00000067560	P61586	RHOA	1	0.416605	0.336262	-0.556069	0.500474	-0.245767	-0.384087	0.52329	-0.281887	0.346971	-0.21339	-0.0992046	-0.471364	0.504883	-0.276454	0.338262	-0.299744	-0.103407	-0.370766	0.427335	-0.135608	0.634535	-0.116284	0.0197039	-0.494288
ENSG00000067704	Q9NSE4	IARS2	7	0.143839	0.195547	0.0553686	0.300249	-0.313499	-0.213507	0.321416	0.331927	0.198664	0.290255	-0.0921737	0.0720644	0.285284	0.399081	-0.15015	-0.0532639	-0.176396	-0.111448	-0.197161	-0.276327	-0.140252	-0.394569	-0.247901	-0.227045
ENSG00000067715	P21579	SYT1	9	-0.249657	-0.839934	1.2819	-0.647959	1.2161	0.965886	-0.825388	0.824098	-0.274308	0.29563	0.897609	0.113126	-0.877629	0.636868	-0.486364	-0.767286	0.073743	-0.711693	-0.695117	-0.239518	-0.357843	0.066507	0.542055	0.0591687
ENSG00000067829	P51553	IDH3G	8	-0.0722342	-0.329297	0.0223699	-0.345183	0.0445052	0.1305	0.147423	0.404433	0.0469557	0.402916	-0.320079	-0.0395375	0.157834	0.576149	0.180923	-0.265529	-0.166138	-0.0899259	-0.156718	0.0939335	-0.160007	-0.109274	-0.139292	-0.0147296
ENSG00000067836	Q9GZN7	ROGDI	9	0.292605	0.553645	0.415834	-0.0714539	0.50845	0.322487	-0.013375	0.379607	-0.602503	-0.0393323	-0.0331394	0.00757682	-0.335783	0.171969	-0.0934013	-0.0620248	-0.163191	-0.156393	-0.473022	-0.023001	-0.457304	-0.104944	-0.0555016	0.0321956
ENSG00000067900	Q13464	ROCK1	2	0.064395	-0.164858	-0.294706	-0.109176	0.00523602	-0.26091	-0.115619	-0.294848	-0.0543473	-0.163312	0.383443	0.0847515	-0.129599	-0.15904	-0.104405	-0.0472946	0.220192	-0.0426034	0.121848	-0.0606697	0.395994	0.259865	0.358353	0.107312
ENSG00000067955	Q13951	CBFB	3	-0.16666	0.196734	-0.160454	-0.239585	-0.156143	0.0135449	-0.0234947	0.167872	0.0194825	0.33782	-0.268071	0.0743203	-0.0633752	0.421746	-0.0946416	-0.0217953	-0.128239	0.228952	0.133236	-0.121767	-0.0236277	-0.249116	-0.00349934	0.126761
ENSG00000067992	Q15120	PDK3	1	0.0298754	-0.403414	0.137028	0.230993	0.250399	-0.311786	0.161602	-0.456925	-0.141675	-0.274277	0.228913	-0.492077	-0.0104734	-0.0370077	0.122267	-0.13785	0.12088	-0.471661	0.559405	0.707183	0.279252	-0.922242	0.864002	-0.032412
ENSG00000068366	O60488	ACSL4	9	-0.452624	-0.545551	-0.0876079	-0.562198	-0.227905	0.353125	-0.0204057	0.00294591	0.414049	0.150329	-0.219593	0.0589208	-0.390684	-0.0982859	0.410071	0.578173	0.120794	0.131541	-0.473816	0.398946	-0.429341	0.267128	0.181361	0.440627
ENSG00000068400	Q4V328	GRIPAP1	8	-0.125932	0.195652	0.0342616	-0.0656971	0.162475	-0.0414635	0.00899472	0.18678	-0.0811449	-0.000295838	-0.0622144	0.0373908	0.0752679	0.187648	-0.0116893	0.0629795	-0.0711332	-0.0708481	-0.271942	-0.0313339	-0.146743	0.11986	-0.204357	0.113486
ENSG00000068615	Q9H902	REEP1	9	-0.164979	0.146222	0.244555	0.420441	0.116394	0.138256	0.52911	0.32397	0.127889	0.395803	-0.381567	-0.0590144	0.376317	0.156701	0.026964	-0.182664	-0.135814	-0.174923	-0.737486	-0.250475	-0.506882	-0.369543	-0.407866	0.368593
ENSG00000068784	Q8N5C6	SRBD1	1	0.0773824	0.33791	-0.403735	0.211364	-0.232762	-0.103833	0.0891204	-0.0205845	0.319786	0.170428	0.234917	0.00205635	0.141884	0.229858	-0.162827	-0.0664441	-0.120866	-0.0920414	0.0494398	-0.277808	-0.10588	-0.0818918	-0.119678	-0.0757941
ENSG00000068796	O00139	KIF2A	9	0.0404504	-0.0298327	0.248264	0.0518004	-0.00325844	0.0382157	0.0900702	0.0410904	-0.214309	0.100592	0.0630421	0.372254	-0.141388	0.474872	-0.148917	-0.1184	-0.0440575	0.10512	-0.20083	-0.274068	-0.165301	-0.236525	-0.164804	0.115921
ENSG00000068903	Q8IXJ6	SIRT2	8	0.200482	-0.0310614	0.235152	-0.140408	0.232549	0.486676	0.000191392	0.0339943	-0.0609691	0.376921	-0.346557	-0.175903	-0.335436	0.13126	0.133348	-0.128907	-0.0261343	0.161063	-0.15381	-0.313768	-0.188359	0.0430911	-0.208759	0.0753451
ENSG00000068912	Q96DZ1	ERLEC1	7	-0.162915	-0.182311	0.368618	-0.0692277	-0.157078	0.186666	-0.112322	0.141616	0.113834	0.227518	0.184308	0.0500386	-0.256578	-0.322185	0.0500528	-0.0294121	0.395461	-0.0148286	-0.280183	-0.203053	0.14054	-0.147601	0.330459	-0.251415
ENSG00000068971	Q15173	PPP2R5B	9	0.327135	-0.12973	0.983555	-0.00058883	0.197272	0.413066	-0.636536	0.016463	-0.0483289	0.0638814	-0.201976	-0.190939	0.0581898	-0.146999	-0.701529	0.00578758	0.0949456	0.147236	-0.180924	-0.0705918	-0.0782825	-0.136621	-0.0613921	0.276907
ENSG00000069275	Q9H1E3	NUCKS1	4	0.409463	0.214186	0.227018	0.352729	0.204983	-0.135276	0.174545	0.249145	0.00414864	0.129723	-0.251399	0.115214	0.213279	0.265377	-0.0438842	-0.232153	-0.438929	-0.0208753	0.0350261	-0.254153	-0.236711	-0.344912	-0.448118	-0.188424
ENSG00000069869	P46934	NEDD4	5	0.0341302	-0.254518	-0.302671	0.0291494	0.852022	0.421795	-0.440424	-0.465213	0.0248558	-0.607352	0.245408	-0.175275	-0.0197985	-0.337762	0.136284	-0.364747	0.21433	-0.19837	-0.156638	0.341969	0.199703	0.420677	0.370571	0.031873
ENSG00000070061	O95163	ELP1	5	0.178547	-0.226676	-0.0502184	-0.147736	-0.0645762	0.0131385	0.069418	0.113926	-0.118758	0.0831734	-0.155524	-0.0633143	0.0590334	0.101569	0.00667261	0.13323	-0.160421	-0.0635088	-0.0822473	-0.107783	0.257584	0.104052	0.079947	0.0404718
ENSG00000070367	O00471	EXOC5	8	-0.152799	-0.185678	-0.0496655	-0.236835	-0.213743	-0.043914	-0.0142345	-0.0055757	0.102849	0.0539061	-0.0876255	0.0619242	0.0728374	0.13851	0.0634008	0.20108	0.125849	0.132198	0.10747	-0.123743	0.0348119	-0.0630336	0.0882927	-0.00628234
ENSG00000070495	Q6NYC1	JMJD6	8	-0.530642	0.0871454	0.232056	-0.972077	-0.0779894	0.222785	-0.596065	0.203656	-0.224327	-0.09514	-0.0258241	0.280746	-0.122431	0.123851	-0.0365155	0.546829	-0.357125	0.240771	0.229551	0.70936	-0.426131	0.815311	-0.454959	0.227163
ENSG00000070501	P06746	POLB	8	-0.237713	-0.348499	0.535326	-0.32761	0.46026	0.232654	-0.00685709	0.301407	0.0522376	0.271671	-0.273291	0.137362	0.095837	0.413177	-0.363642	-0.0259547	-0.26947	0.231408	-0.714978	-0.214137	-0.00966636	0.107243	-0.188427	0.141663
ENSG00000070610	Q9HCG7	GBA2	8	-0.226151	0.025007	-0.0110793	-0.0181831	-0.0913705	-0.00424622	-0.252909	0.0111683	-0.275951	-0.0473286	0.195502	0.223465	-0.199835	-0.167349	0.125628	0.313654	-0.231948	0.180887	-0.176284	0.167237	-0.035645	0.211322	0.143075	0.141333
ENSG00000070718	P53677	AP3M2	9	-0.352148	0.232559	0.456184	-0.117599	0.163334	-0.019854	-0.225233	-0.00046033	-0.349271	-0.0843833	0.0547967	0.310867	-0.376965	-0.123859	-0.237789	0.411357	0.193591	0.364319	-0.377629	0.363894	-0.18397	0.20628	-0.492902	0.184881
ENSG00000070814	Q13428	TCOF1	7	0.324419	0.185238	-0.17149	0.551785	-0.0498884	-0.271458	0.170643	0.0574766	-0.0700095	-0.122315	-0.0853012	0.0586881	0.316615	0.10489	-0.191472	-0.0166316	-0.241777	0.0496014	-0.43767	-0.102116	-0.053304	0.216445	-0.396472	0.174106
ENSG00000070831	P60953	CDC42	5	0.170146	-0.522998	0.770464	-0.444225	0.392205	0.277123	0.173236	0.385237	0.0825696	0.205476	-0.0251437	-0.0226735	-0.189539	0.378624	-0.661389	-0.25109	-0.200244	0.0171131	0.390504	-0.0336815	0.250369	-0.600646	-0.19494	-0.346496
ENSG00000070961	P20020	ATP2B1	7	0.293936	0.136637	0.00257791	0.176399	0.239527	-0.0384615	0.458907	-0.0502124	0.225233	-0.27716	0.0217609	-0.110956	0.284482	-0.0706181	-0.0965612	0.0505698	0.004891	-0.0367421	-0.0320229	-0.17663	-0.283255	-0.54995	-0.0829881	-0.0893618
ENSG00000071051	O43639	NCK2	9	-0.385958	-0.01519	-0.548007	-0.393501	0.207198	-0.489898	-0.0631015	0.319868	0.168172	0.322738	0.415094	0.085386	-0.561087	-0.247677	0.118841	0.47891	0.153778	0.329286	-6.44e-05	-0.0441622	-0.222643	-0.0489711	0.097541	0.323449
ENSG00000071539	Q15645	TRIP13	1	0.921675	0.302767	0.209545	1.02461	-0.0465119	0.0941232	0.0125749	0.131315	-0.300757	-0.683351	0.282742	0.329467	-0.032183	-0.593884	0.148103	-0.201272	-0.20912	-0.587537	-0.331874	0.418281	0.354368	-0.253178	-0.183593	-0.806307
ENSG00000071553	Q15904	ATP6AP1	9	-0.354275	-0.230226	0.723939	-0.405169	0.58649	0.6333	-0.0673962	0.706081	-0.243348	0.717721	-0.376823	0.0450575	-0.166777	0.571314	-0.329788	0.0860848	-0.321388	0.107752	-0.376486	0.147866	-0.548568	-0.35691	-0.32829	-0.22016
ENSG00000071564	P15923	TCF3	1	0.0403979	0.74477	-0.191796	0.722312	0.370292	0.234275	0.297545	0.00807662	0.217093	-0.195135	-0.120958	-0.334531	0.141493	-0.286817	-0.204712	-0.160636	-0.0168966	-0.168827	-0.111391	0.129659	-0.456764	-0.223992	-0.194091	-0.239368
ENSG00000071994	Q16342	PDCD2	9	0.0109616	0.4378	-0.0625208	0.0243347	0.00117602	-0.326143	0.0550227	-0.204931	0.0110504	0.139515	-0.359541	0.319497	-0.159882	0.230532	0.0238647	0.296251	0.289312	0.229642	-0.394842	-0.00623056	-0.260794	-0.434993	0.0183102	0.122609
ENSG00000072062	P17612	PRKACA	7	-0.286241	-0.119915	0.410241	0.13223	0.30834	0.272862	0.219159	0.0589634	-0.0246369	0.195905	-0.0217278	0.0822037	-0.0107824	-0.0658286	-0.0862795	-0.448507	-0.280857	-0.0115864	-0.106192	-0.0452721	0.430342	-0.0168669	-0.368658	-0.216894
ENSG00000072110	P12814	ACTN1	1	0.692098	0.669983	-0.8386	1.04228	-0.428	-0.626066	0.505262	-0.642219	0.410342	-0.227926	0.298011	-0.212018	0.735843	-0.388639	0.678756	-0.382107	0.37171	-0.411107	-0.0725796	-0.553656	0.268531	-0.43559	0.15281	-0.607119
ENSG00000072121	Q68DK2	ZFYVE26	8	0.104008	-0.195109	-0.137035	-0.106927	-0.123153	-0.345169	-0.0339035	-0.515951	0.0345833	-0.194727	0.120618	0.179387	0.0866655	0.00467089	0.0746316	-0.0994425	0.314254	-0.0860634	0.387775	-0.10902	0.15608	0.084676	0.314638	0.0845132
ENSG00000072195	Q15772	SPEG	8	-0.375283	-0.00778326	-0.0846781	-0.306883	-0.371376	-0.0686297	-0.382603	0.170345	0.14436	0.00166842	0.0812025	0.272135	-0.444139	-0.0788744	-0.37968	0.0906375	0.0262026	0.3629	-0.298428	0.680204	0.0270642	0.51282	-0.0546044	0.483423
ENSG00000072210	P51648	ALDH3A2	6	0.182753	-0.0423481	-0.296055	-0.0921917	-0.710064	-0.534222	0.353568	-0.516638	0.321398	-0.459733	0.10708	-0.176649	0.189889	-0.347846	0.241385	0.0334123	0.110852	0.0466513	0.327142	0.166434	0.378938	0.510132	0.129401	0.0767098
ENSG00000072274	P02786	TFRC	1	-0.0791054	-0.104397	-0.34206	0.343048	0.306929	0.0975829	0.30372	-0.397117	0.0932675	-0.288937	-0.139653	-0.164332	0.00116455	-0.266892	0.0361546	-0.10116	0.258729	0.257844	-0.132162	-0.254275	0.0843677	0.0732181	0.169624	0.244442
ENSG00000072364	Q9UHB7	AFF4	8	0.0060906	-0.228578	0.463717	0.143361	0.00593491	-0.187135	-0.301293	0.0242775	-0.0335545	-0.311667	0.261259	0.398416	0.0554374	0.0789053	-0.146586	-0.37233	0.310345	-0.0288825	-0.130631	0.0113724	0.223988	-0.0915757	0.0133499	-0.164221
ENSG00000072401	P51668	UBE2D1	8	-0.171322	-0.266493	0.469745	0.00204363	0.261073	0.0910995	0.0855042	0.0778568	0.0637356	0.0319151	-0.129348	-0.075655	-0.264523	0.0648381	-0.143976	0.111277	-0.185171	-0.116568	-0.309685	-0.147006	0.196152	0.298797	-0.0311233	0.0868328
ENSG00000072415	Q8N3R9	MPP5	1	1.09172	1.00574	-0.580823	1.42108	-0.62759	-0.85188	0.832543	-0.39124	0.913532	-0.391331	0.538821	-1.01776	0.984748	-0.421244	0.710641	-0.888652	0.370426	-1.2373	0.633737	-0.948332	0.890725	-0.0766116	-0.559705	-1.40124
ENSG00000072501	Q14683	SMC1A	1	0.259234	0.198181	0.370887	0.295316	0.122608	-0.0793653	0.0940565	0.193457	0.116059	0.0843922	-0.272876	-0.0648912	0.201586	0.313562	-0.126538	-0.19092	-0.385224	-0.261743	0.00313834	-0.303017	0.103267	-0.0535384	-0.48648	-0.13115
ENSG00000072682	O15460	P4HA2	2	0.626259	0.99343	-0.00011219	0.283256	-0.156637	-0.0199884	-0.197612	-0.595034	0.0317608	-0.605916	-0.283671	0.322138	0.160686	-0.175665	-0.142658	-0.0929443	0.150694	0.0101657	-0.487926	0.032791	-0.243646	-0.0097251	0.173058	0.227298
ENSG00000072778	P49748	ACADVL	5	-0.304379	0.0939073	-0.561768	0.143136	-0.195294	-0.198028	0.00783703	-0.678833	-0.00250411	-0.580949	0.257237	-0.0619109	-0.0117221	-0.478924	0.389954	0.0259498	0.656528	0.0506141	-0.0260447	0.0631125	0.283198	0.420847	0.497077	0.210959
ENSG00000072832	Q14194	CRMP1	9	-0.0121374	0.445872	0.395361	0.0265698	0.243594	0.431726	-0.335134	0.192495	0.0962246	0.385438	0.0214928	0.104482	-0.153531	0.257513	-0.211509	0.129503	-0.437796	0.220864	-0.272588	0.0676251	-0.596337	-0.458338	-0.487495	-0.053898
ENSG00000072958	Q9BXS5	AP1M1	9	-0.232432	-0.322925	0.375849	-0.0561851	0.393836	0.493325	0.0259161	0.695168	-0.103087	0.431524	-0.404804	0.097501	0.115762	0.502858	-0.201628	-0.0390633	-0.407603	-0.0211966	-0.254108	-0.366424	0.00242049	-0.0907158	-0.575226	-0.0587629
ENSG00000073050	P18887	XRCC1	1	0.189069	0.240832	-0.276684	0.290801	0.0299726	-0.356577	0.372102	-0.058315	0.217477	0.0106308	-0.0808437	-0.270651	0.267776	0.0474988	0.122578	-0.0999806	-0.106044	-0.0303974	-0.286901	-0.286292	0.0386417	0.0466552	-0.0538782	0.0325308
ENSG00000073060	Q8WTV0	SCARB1	3	0.160946	0.545062	-0.118378	-0.128693	0.0717535	-0.045421	0.166339	0.335943	0.228431	0.396883	-0.490219	0.328299	-0.312216	-0.00123563	-0.555136	-0.333375	-0.426266	0.0780678	0.163773	-0.106183	-0.473471	0.216777	-0.0545202	0.35284
ENSG00000073111	P49736	MCM2	1	0.899958	0.919419	-0.907164	-0.0352721	0.0763455	-0.546985	0.327662	-1.51183	0.159078	-2.04609	1.37434	-0.314666	-0.112356	-1.96851	0.451181	-0.454538	1.66909	-0.629335	1.05949	-0.243676	0.517793	0.498469	1.17889	-0.36129
ENSG00000073169	Q9BVL4	SELENOO	5	0.00311435	0.0864626	-0.367121	-0.175931	-0.0391288	0.0683365	-0.102445	-0.0710707	-0.411386	0.0176858	-0.397654	-0.0257542	-0.158941	-0.184851	0.0801569	0.415903	0.202304	0.221627	-0.255715	0.460351	0.0994743	0.421181	0.0345872	0.0788147
ENSG00000073584	Q969G3	SMARCE1	1	0.131283	-0.121093	0.154835	0.0721168	0.493113	0.225174	0.167461	0.0542864	0.0785771	-0.167993	-0.0995619	-0.214699	0.109885	0.0176724	-0.166908	-0.0991546	-0.0583769	-0.0917819	0.0182882	-0.228903	0.00557169	-0.115188	-0.0162831	-0.14832
ENSG00000073711	Q06190	PPP2R3A	5	0.10201	-0.383308	0.552441	-0.0155183	0.415296	0.527563	-0.279246	0.420363	-0.0341689	0.204233	0.334042	-0.148868	-0.209399	0.204681	-0.27442	-0.111354	-0.245944	-0.428887	-0.150938	-0.0919494	0.0109768	-0.0306467	-0.0958373	-0.27112
ENSG00000073712	Q96AC1	FERMT2	2	-0.293621	-0.334794	-0.0700981	0.0307495	-0.702068	-0.685918	0.177465	0.358979	0.0686332	0.22287	-0.0373555	0.301933	0.0311741	0.0928164	0.259307	-0.0245133	0.242344	0.444142	-0.665829	-0.181937	0.0372933	0.121474	0.212856	0.394099
ENSG00000073792	Q9Y6M1	IGF2BP2	4	0.326571	0.12136	-0.00415933	0.547088	0.163052	0.00307634	-0.105806	-0.154314	0.202986	-0.346528	0.37428	-0.236715	0.0514559	-0.107767	0.321705	-0.400613	-0.00863499	-0.335565	-0.0485622	-0.00627916	-0.0144155	0.169975	-0.316984	-0.195205
ENSG00000073921	Q13492	PICALM	5	0.117501	-0.181688	0.214559	0.111508	-0.123668	-0.0212941	0.000358958	0.0456219	-0.00678666	0.123006	0.181276	0.0296574	0.0714431	0.134943	0.152278	-0.0760378	-0.0670829	-0.093918	-0.1301	-0.242975	0.0163483	-0.106391	-0.0398014	-0.108757
ENSG00000073969	P46459	NSF	9	-0.835312	-0.476246	0.427159	-0.207931	0.24753	0.761351	-0.556165	0.203065	0.236288	0.602344	-0.675133	0.0268342	-0.1553	0.799257	-0.245051	0.270357	-0.200338	0.561497	-0.231249	0.0412778	-0.282628	0.00716687	-0.348105	0.0293307
ENSG00000074047	P10070	GLI2	1	-0.580641	0.0701644	0.493491	0.0128698	-1.18777	-0.53904	0.318649	-0.00897475	-0.142512	0.827237	-0.021111	0.194203	-0.102883	-0.794226	0.332875	0.630905	0.00875742	-0.343781	0.497584	0.70992	0.171036	0.0307246	0.091907	-0.669385
ENSG00000074201	P54105	CLNS1A	1	0.335682	0.17755	-0.876397	0.4379	-0.656933	-0.67249	0.807904	-0.546845	0.660406	-0.177255	0.233702	-0.431063	0.810499	-0.22162	0.154535	-0.341416	0.171953	-0.0619099	0.250167	-0.419652	0.263659	-0.00408548	0.272758	-0.167048
ENSG00000074219	Q15562	TEAD2	1	-0.203789	0.0403577	0.184823	0.271538	-0.24458	-0.733329	-0.06866	0.596044	0.520995	0.796075	-0.384782	-0.150457	-0.0360975	-0.486889	-0.0392483	0.147328	0.347828	-0.690141	0.280649	0.275336	0.0163349	0.121922	-0.246045	-0.315213
ENSG00000074356	Q53F19	NCBP3	3	-0.0631772	0.0268821	-0.160618	-0.131029	0.162493	0.110207	-0.0780085	-0.168668	-0.0373322	-0.189972	0.0853756	0.16618	0.0386212	-0.227463	0.0141465	0.056302	-0.094296	-0.00790546	-0.00555541	-0.00381513	0.0839687	0.328985	-0.141363	0.236042
ENSG00000074603	Q6V1X1	DPP8	4	0.0669026	-0.108963	0.199201	-0.101414	-0.0941752	-0.0818493	-0.173044	-0.24108	-0.30616	-0.283383	0.41195	0.184041	0.156657	-0.0930961	0.0491634	-0.0196384	0.222681	-0.0745941	0.174394	0.0273633	0.0856701	0.209306	-0.20925	-0.000683713
ENSG00000074696	Q9P035	HACD3	4	0.15358	0.345108	-0.248385	0.575196	-0.0665527	0.067978	0.320463	-0.240871	0.326806	-0.176232	-0.0485005	-0.225058	0.437468	-0.137658	0.368057	-0.129128	-0.0885344	-0.314768	0.112333	-0.24787	0.0441842	-0.254829	-0.284885	-0.287901
ENSG00000074755	O43149	ZZEF1	9	-0.133547	-0.604817	0.114426	0.205661	0.126676	-0.141953	-0.0526538	0.22194	-0.195332	0.256863	-0.00626247	0.324555	-0.204349	0.0521266	-0.280251	-0.184777	-0.140566	0.0567717	0.28457	0.408323	-0.0931297	-0.152498	0.0939643	0.0442593
ENSG00000074800	P06733	ENO1	4	0.598834	-0.219122	0.340938	0.240251	0.430166	0.0540583	0.286133	0.162443	0.342019	-0.0527752	-0.584762	-0.105018	-0.0316106	-0.0968521	0.155261	0.151609	-0.700584	-0.246285	-0.174365	0.450795	-0.203013	0.257524	-0.703799	-0.351846
ENSG00000074855	Q9HCE9	ANO8	9	-0.097188	0.144925	0.10419	-0.246565	0.21904	0.242184	-0.155904	0.00574671	-0.355454	-0.000727519	-0.10314	0.0745045	-0.0194875	-0.083582	-0.13373	-0.170574	0.12898	0.00255649	-0.0765068	0.182387	0.0649796	0.0786507	-0.0434641	0.238179
ENSG00000075089	Q9GZN1	ACTR6	5	-0.395634	-0.26215	0.444386	-0.677263	-0.159755	-0.0200959	0.0783079	0.0781387	0.0421472	0.119686	-0.292853	-0.0312676	-0.297981	0.393674	-0.0763904	0.274368	0.057227	0.306471	-0.147913	-0.110339	0.204198	0.190934	0.024766	0.25734
ENSG00000075142	P30626	SRI	1	0.121654	0.862079	0.355217	0.166346	-0.000289229	-0.887459	0.0813638	0.282248	0.138929	-0.0524072	-0.175793	-0.638207	0.47268	-0.0759749	0.279095	-0.360124	0.352173	-0.384397	-0.206502	-0.351742	0.0301438	0.186342	-0.331432	0.136057
ENSG00000075234	Q5R3I4	TTC38	1	0.462902	0.539962	-0.438427	0.0601543	-0.14643	-0.0196658	0.501751	0.185232	-0.37592	0.025606	-0.238486	-0.325089	0.0655766	0.00236249	-0.132569	-0.147072	-0.0412085	0.492884	-0.196989	-0.135643	0.122173	0.13842	-0.143221	-0.256304
ENSG00000075239	P24752	ACAT1	9	-0.710656	-0.34865	0.336223	-0.353272	0.281785	0.395048	-0.223297	0.515237	0.318581	0.634491	-0.352481	0.469709	-0.429039	0.742761	-0.288274	0.0423564	-0.274209	0.205221	-0.599864	0.109119	-0.145115	-0.0502255	-0.212563	-0.0628875
ENSG00000075292	Q14966	ZNF638	7	0.137461	-0.0356935	0.0407133	-0.0919123	0.0967134	-0.084689	0.0142318	0.0204191	-0.103892	-0.0112071	-0.0344114	0.12456	0.0609496	0.0797501	-0.0667351	0.06271	0.110126	-0.0503044	-0.262831	-0.169152	0.0199067	0.216346	-0.0459324	-0.027126
ENSG00000075340	P35612	ADD2	9	-0.191148	0.154101	0.0892802	0.218951	-0.112388	-0.0978995	-0.41774	-0.155986	-0.152775	-0.0736313	0.184484	0.320293	0.00615849	0.0549857	0.117694	-0.216433	-0.0104246	-0.0124619	-0.0035092	0.036602	-0.0220209	0.146096	0.0177389	0.120033
ENSG00000075391	Q9UJF2	RASAL2	7	-0.376896	-0.524086	0.389886	-0.159119	0.658395	0.456915	-0.687733	0.0807303	-0.680325	-0.227564	0.388234	0.618094	-0.58376	0.136023	-0.299965	-0.162134	0.0719735	-0.0844868	0.301933	0.326342	-0.231695	0.278579	-0.00661088	0.317269
ENSG00000075399	Q9Y2B5	VPS9D1	8	-0.425659	-0.231079	0.0908697	0.0517044	0.471821	0.25002	-0.306123	0.0069059	-0.275795	0.24165	-0.539323	-0.25167	-0.46331	0.182712	-0.398555	0.206374	-0.0107758	0.323949	-0.173694	0.50532	0.00307557	0.644475	0.00972185	0.0873864
ENSG00000075413	P27448	MARK3	8	-0.0404597	0.0398432	0.0927645	-0.0124793	0.131999	0.112192	-0.121567	0.0262787	0.104174	-0.0217616	-0.0554019	0.0352415	-0.100276	0.133934	-0.224453	0.0801896	-0.0982831	-0.107685	-0.0225901	0.0891803	-0.118941	0.10325	-0.123844	0.0986954
ENSG00000075415	Q00325	SLC25A3	3	0.399878	0.245241	0.366655	0.110433	0.0764723	0.187999	0.168312	0.201749	0.104151	0.217329	-0.196536	-0.0417957	0.070546	0.225743	-0.144112	-0.0710662	-0.0946202	-0.158993	-0.112883	-0.3125	-0.307083	-0.411035	-0.314902	-0.20898
ENSG00000075539	O94915	FRYL	2	0.275868	0.00759977	-0.357466	-0.141603	0.0231597	-0.337381	0.16049	-0.128995	0.0736912	-0.140934	0.048433	-0.0382024	0.195371	0.0469584	0.193774	0.404803	0.355494	0.0583981	-0.427778	-0.0228004	-0.0194245	-0.000857409	-0.0996949	-0.128905
ENSG00000075624	P60709	ACTB	6	-0.0494006	-0.27344	0.0944231	-0.0520445	-0.430004	-0.0616642	0.175839	0.181809	0.20919	0.0990582	-0.110832	0.0625278	0.12264	0.291296	0.145073	0.264959	-0.313809	-0.136263	0.101583	-0.00216319	-0.0140978	0.0736133	-0.220078	-0.158217
ENSG00000075711	Q12959	DLG1	1	0.231286	-0.223744	-0.142711	0.461682	0.25709	-0.338177	-0.462104	0.360472	-0.154602	-0.138051	0.129653	0.157135	-0.00923072	0.223549	-0.0778141	-0.275025	-0.00699984	-0.127765	0.183559	-0.0386401	0.318712	-0.0533926	0.0811681	-0.356053
ENSG00000075785	P51149	RAB7A	9	-0.405502	-0.457775	0.345198	-0.469529	0.337087	0.314177	-0.0580656	0.519565	-0.0633454	0.415701	-0.0706288	0.00386735	-0.214127	0.566105	-0.201648	0.0854755	-0.0831539	0.149532	-0.452075	-0.149305	-0.291189	0.0391097	0.00378829	0.136738
ENSG00000075790	Q9UHQ4	BCAP29	7	-0.324384	-0.283111	-0.485262	-0.221651	-0.397533	-0.182956	0.784832	-0.116062	0.212035	-0.0242314	0.0576127	0.369468	0.00386123	-0.091758	0.217814	0.331469	0.0909958	0.191487	-0.180741	-0.447003	0.0502071	-0.148893	0.265818	0.327983
ENSG00000075856	Q15020	SART3	6	0.173635	-0.081829	-0.150386	0.106486	-0.248505	-0.167247	0.132326	-0.00812865	0.00140195	-0.0975445	-0.174425	-0.00723029	0.149699	-0.0417605	-0.00497813	-0.0400808	-0.00735068	-0.0430553	0.0236857	0.0519336	0.173577	0.0545064	0.204406	0.000864304
ENSG00000075914	Q15024	EXOSC7	4	0.452064	0.426257	-0.158454	0.240659	0.080511	-0.243201	0.118514	-0.0445256	-0.0503751	0.0817207	-0.334176	0.257155	0.188359	-0.179943	-0.205389	-0.370219	0.0690671	0.01281	-0.0470521	-0.0298095	-0.0755822	-0.263994	-0.199474	0.275077
ENSG00000075945	Q92845	KIFAP3	9	-0.0880199	0.0805686	0.0109148	0.019978	-0.116732	0.144759	0.590868	0.329957	0.286938	0.266148	-0.409368	-0.414073	0.111873	0.302737	-0.0776323	0.176816	-0.0776621	0.00990138	-0.442222	-0.247571	-0.216219	-0.152817	-0.127836	0.0386948
ENSG00000076003	Q14566	MCM6	1	0.0978263	0.61822	0.079797	-0.017368	-0.160804	-0.244486	-0.353291	0.130638	-0.053001	-0.281437	0.00316921	0.78445	0.270857	0.314528	-0.133546	0.228093	-0.234166	-0.249035	0.303408	-0.122881	0.0756197	-0.181545	-0.259385	-0.615664
ENSG00000076108	Q9UIF9	BAZ2A	4	0.0665923	0.107891	0.0569168	0.211211	0.172465	0.00165014	0.100521	0.0426864	0.00796438	-0.207743	0.095421	0.028804	0.334294	0.0787431	-0.138654	-0.128315	0.0392774	-0.158654	-0.161561	-0.280045	-0.029266	-0.0585013	0.0590218	-0.240721
ENSG00000076201	Q9H3S7	PTPN23	9	-0.398193	-0.370997	0.423614	0.00810367	0.0806096	0.199909	-0.148163	0.34635	-0.0518788	0.0157296	-0.066531	0.295436	-0.165196	0.23945	-0.378414	-0.316947	-0.0911888	0.297012	-0.134139	-0.289577	-0.113503	0.222484	0.124065	0.271962
ENSG00000076242	P40692	MLH1	1	0.527283	0.157215	-0.101308	0.27326	0.122429	-0.339918	0.22489	0.0245225	-0.0132522	-0.00624632	-0.179937	-0.124161	0.301109	0.204474	0.158983	-0.506151	-0.143768	-0.111661	0.119129	-0.436313	0.207081	-0.104174	-0.0305085	-0.222977
ENSG00000076248	P13051	UNG	1	0.276352	1.04631	-0.696008	0.102982	-0.529838	-0.699424	0.322563	-0.6177	0.285368	-0.414496	-0.172035	-0.205652	0.123399	-0.740459	0.377011	0.238574	0.506377	0.234294	0.312349	-0.214232	0.173234	0.0323179	0.0305294	0.228182
ENSG00000076356	O75051	PLXNA2	6	-0.412771	-0.685603	0.263673	-0.294423	0.157364	0.255928	-0.208446	0.267156	-0.172119	0.259197	0.410776	0.307462	-0.230885	0.37404	-0.0879675	0.00450615	0.0293912	0.074586	-0.00865983	-0.0940123	-0.114905	-0.105174	-0.0430932	0.0539786
ENSG00000076641	Q9NWQ8	PAG1	6	-0.146814	-0.665339	-0.646	0.0737955	-0.513042	-0.548335	0.51561	0.424694	0.0920076	-0.351205	-0.286436	0.564999	0.205139	0.0157399	-0.0602932	0.927424	0.0163282	0.294598	0.211993	0.0246553	-0.250334	-0.143679	-0.0406487	0.285142
ENSG00000076716	O75487	GPC4	1	-0.0863451	-0.0509585	-0.140913	0.248909	0.957726	0.604219	-0.0880757	-0.272619	0.248876	0.227816	-0.0403595	-0.0618578	0.021521	0.491237	0.234476	-0.675279	-0.282566	-0.129633	0.504498	-1.27163	0.312311	-0.399242	0.0146085	-0.366725
ENSG00000076826	Q9P1Y5	CAMSAP3	9	0.0165681	-0.00820788	-0.188179	-0.00741236	-0.0688002	0.299403	0.203323	0.488045	0.423944	0.226887	0.0062307	0.00665115	-0.296309	0.0794166	-0.508221	-0.0121142	0.15754	0.0763849	-0.493031	-0.302581	0.0383927	-0.103411	-0.170348	0.13583
ENSG00000076864	P47736	RAP1GAP	9	0.675016	-0.146712	0.30561	0.013659	0.306778	0.443567	-0.803191	0.073148	0.115777	-0.207643	-0.264323	0.139311	-0.329654	-0.163415	-0.0296753	0.103556	0.314701	0.126731	-0.599205	0.0646628	-0.323588	0.831293	-0.828676	0.182272
ENSG00000076924	Q9HCS7	XAB2	2	0.123248	0.193603	-0.157556	0.359169	0.190305	-0.168322	0.13437	-0.0650635	-0.0267036	0.0285452	0.0858356	-0.135008	0.212	-0.343215	-0.246036	-0.13007	0.116585	-0.176262	-0.060771	-0.00546529	-0.065976	-0.154988	0.280325	0.0114515
ENSG00000076928	Q92888	ARHGEF1	2	0.0016156	0.776905	-0.571545	0.576609	-0.100082	-0.00355927	0.0635343	-0.870313	0.1354	-0.486122	0.456197	-0.365891	0.431378	-0.845927	0.292247	0.138262	0.202874	-0.11727	0.0776599	-0.17845	0.0643339	0.148102	0.24553	-0.0714874
ENSG00000077063	Q8WZ74	CTTNBP2	9	-0.00407402	-0.356271	0.0984158	-0.218787	0.0938285	0.277343	0.162851	-0.172861	0.125505	-0.0172547	0.129543	-0.0515307	-0.0941805	-0.146194	-0.0637666	0.0194882	0.100242	-0.139765	0.090242	-0.0129265	-0.0526142	0.0861709	0.0724972	0.0740993
ENSG00000077080	O94805	ACTL6B	9	-0.0932023	0.0313176	0.248083	0.469023	0.282101	0.307841	0.051164	0.132078	0.511239	0.375825	-0.328167	-0.136706	-0.214753	0.0967685	0.0591122	-0.0921207	-0.546645	-0.11934	-0.179843	-0.0374617	-0.343447	-0.0757438	-0.340752	-0.0563717
ENSG00000077152	Q9NPD8	UBE2T	1	-0.180437	0.677027	0.108289	-0.0889886	-0.634022	0.0710217	-0.17543	0.398805	0.00191267	0.390044	-0.204705	0.0143273	0.0939349	0.7911	0.491909	0.412054	-0.665167	-0.187996	0.260107	-0.821502	0.0592728	0.0569511	-0.613323	-0.255185
ENSG00000077232	Q8IXB1	DNAJC10	3	0.319437	0.142407	-0.0303551	0.0551385	-0.31312	-0.0971278	0.452364	-0.210006	-0.0884662	0.00637194	0.162863	-0.375067	0.410606	-0.0742843	0.297725	-0.00214096	0.0305147	-0.094007	-0.318391	-0.367928	0.272888	0.00514396	0.109924	-0.29449
ENSG00000077235	Q12789	GTF3C1	1	0.113477	0.0173247	0.150853	0.110876	-0.0992532	-0.117715	0.331226	0.236104	0.226841	-0.0253718	-0.0261041	-0.224334	0.528662	0.182156	-0.021426	-0.451205	0.0347029	-0.355231	-0.000432823	-0.278124	0.0592225	-0.228321	-0.00959222	-0.154335
ENSG00000077264	O75914	PAK3	8	-0.988059	-1.31692	0.535502	-1.42141	0.610188	0.564799	-0.648583	0.284166	-0.55534	0.420338	-0.142121	0.538673	-0.587064	0.35511	-0.469634	0.397121	-0.16758	0.387649	0.350176	0.215757	0.519665	0.611796	0.0735257	0.432248
ENSG00000077279	O43602	DCX	8	-0.693246	-0.558007	-0.574122	-0.581207	-0.484901	-0.139897	0.435183	0.0873814	0.347061	0.76657	-0.204525	0.296521	-0.255492	0.202289	0.0634826	0.477457	0.123202	0.790527	-0.161511	0.169947	-0.46538	0.0871561	-0.0272781	0.298788
ENSG00000077312	P09012	SNRPA	3	0.718923	0.639907	0.131543	0.67606	-0.294448	0.115294	0.209987	0.119875	0.0854028	0.148118	-0.364883	-0.578224	0.202249	0.176971	0.175209	-0.266788	-0.378747	-0.228793	-0.0491313	-0.58684	-0.0920381	-0.142027	-0.328617	-0.0890028
ENSG00000077348	Q9NQT4	EXOSC5	5	-0.010129	-0.218922	0.319097	-0.539824	-0.0495908	0.064306	-0.22829	0.0604898	-0.785229	0.0617189	-0.446665	0.721715	-0.0500184	0.151461	-0.0209675	-0.357298	-0.141966	0.274621	0.547258	-0.0937893	0.0608516	-0.303738	0.421432	0.563476
ENSG00000077380	Q13409	DYNC1I2	9	-0.11957	-0.0698522	-0.0379586	-0.262934	0.0471281	0.089575	0.14935	0.146067	0.263227	0.234506	-0.085745	-0.281182	0.132528	0.176789	0.0690497	0.00663621	-0.086594	-0.0212708	-0.0206959	-0.342952	0.25718	0.0536797	-0.230647	-0.0663148
ENSG00000077458	Q5HYJ3	FAM76B	6	-0.151891	0.0224923	-0.0519307	-0.248597	-0.0959274	-0.15073	-0.339323	-0.207157	-0.14332	0.159296	0.210634	0.299534	-0.214253	-0.198155	0.0628087	0.161727	0.0316828	-0.178406	0.360875	0.194769	0.110317	0.222104	0.0108169	0.132633
ENSG00000077514	Q15054	POLD3	1	0.236582	0.527462	-0.335942	0.0429296	0.0700008	0.0855919	-0.118466	-0.212574	-0.141152	-0.0449819	-0.118156	0.0737874	-0.219579	-0.032652	0.208009	0.278888	-0.105193	0.149286	-0.126062	0.00458826	0.109723	-0.193773	-0.133033	-0.00528167
ENSG00000077684	Q6IE81	JADE1	1	-0.235316	-0.321861	-0.243556	-0.423225	-0.199001	-0.25421	-0.139969	0.0786073	0.0806771	-0.388273	0.352116	0.213563	0.0732923	0.0956891	0.198565	0.223491	0.140176	0.22243	0.203648	0.210565	0.380922	-0.203651	-0.0637829	-0.000896279
ENSG00000077942	P23142	FBLN1	1	0.170836	0.184299	0.0223124	0.465428	0.150181	0.410135	0.175961	0.168894	-0.143399	0.105897	0.118228	-0.0977649	-0.180125	0.189948	0.0207288	-0.176766	0.0306227	-0.23656	-0.263412	-0.163932	-0.173443	-0.205175	0.0244438	-0.597339
ENSG00000078018	P11137	MAP2	8	-0.526842	-0.388631	0.00715918	-0.278382	0.132673	0.200819	-0.282811	0.21738	-0.00173504	0.432575	-0.0917392	0.341298	-0.197405	0.499862	-0.280673	0.130529	-0.0524566	0.0952209	-0.111699	0.14118	-0.106737	-0.0856981	-0.125065	0.331178
ENSG00000078053	P49418	AMPH	7	-0.162074	-0.615668	-0.00190464	-0.548967	0.494069	0.343138	-0.197395	0.273804	-0.111566	0.6047	-0.603765	0.122134	-0.363197	0.390663	-0.424292	0.445862	-0.384741	0.522485	-0.825891	0.231567	-0.0925785	0.635043	0.023515	0.24506
ENSG00000078140	P61086	UBE2K	9	-0.120869	-0.267478	0.359199	-0.310833	-0.0953119	0.226378	-0.120879	-0.0135737	-0.0966519	0.131482	-0.119356	0.0489575	-0.210882	0.342105	-0.361366	-0.478935	0.203281	0.404225	0.075248	-0.195754	-0.0258624	0.0165027	0.609035	0.00133931
ENSG00000078369	P62873	GNB1	9	-0.447234	-0.751042	0.494087	-0.363159	0.443305	0.312011	-0.210957	0.705716	0.0153488	0.659214	-0.385644	0.244791	-0.310138	0.642578	-0.350516	0.0198928	-0.459967	0.151035	-0.324914	0.174264	-0.211112	0.0956051	-0.265566	0.122401
ENSG00000078618	O43847	NRDC	5	0.0268826	0.0280786	0.23679	0.0255501	-0.0291597	0.0250701	0.0694988	0.335401	-0.0106481	0.300937	-0.304216	0.0118002	-0.0873222	0.420026	-0.160432	-0.0588239	-0.141572	0.0113275	-0.256521	-0.228273	-0.0493316	-0.0132865	-0.121696	-0.0300792
ENSG00000078668	Q9Y277	VDAC3	9	0.0685382	-0.359439	0.245414	-0.0727851	0.235484	-0.0426159	0.112869	0.305779	-0.0275026	0.287772	-0.677747	-0.189351	0.37781	0.38035	-0.238142	0.263809	-0.408748	-0.146895	-0.179413	0.115123	0.19261	0.521672	-0.522026	-0.242569
ENSG00000078674	Q15154	PCM1	1	0.429071	0.514228	0.240713	0.461688	-0.0438475	-0.199905	-0.247621	-0.0598005	-0.243385	-0.540743	0.451099	0.339685	-0.0145994	-0.395694	0.0162253	-0.35216	0.286179	-0.194635	0.0192759	-0.109874	0.0395872	-0.349458	0.223718	-0.269746
ENSG00000078699	O43439	CBFA2T2	2	-0.0428241	-0.243511	-0.0917047	0.04847	0.240381	0.122812	-0.141393	-0.226239	-0.134548	-0.112703	0.326579	0.115639	0.00648759	-0.264353	-0.108065	-0.0470809	0.00978244	-0.27444	-0.0501674	0.0895698	0.127187	0.300071	0.254072	0.0959801
ENSG00000078902	Q9H0E2	TOLLIP	9	-0.512504	-0.114085	-0.112303	-0.00835514	-0.222306	0.0383145	0.0559736	0.347081	0.226853	0.0327982	-0.229805	-0.070869	-0.238212	0.0498977	0.0780445	0.267534	-0.186332	0.345881	-0.1224	0.27943	-0.191985	0.335279	-0.285246	0.237316
ENSG00000079102	Q06455	RUNX1T1	9	0.0180693	0.0745031	0.391908	-0.195254	0.438379	0.342273	-0.241374	-0.0894401	-0.152379	-0.114512	-0.0168973	-0.23263	0.192894	-0.363602	-0.0633991	-0.127092	0.111705	-0.0593258	-0.517495	0.123184	0.163254	0.0525151	0.175225	0.0894908
ENSG00000079150	Q9Y680	FKBP7	8	-0.439854	-0.445396	-0.130691	-0.116776	0.0140002	0.0536597	-0.148154	-0.0969852	-0.248618	0.336891	-0.453007	-0.277249	-0.320744	0.00511495	0.118444	0.532085	0.200822	0.441065	-0.117312	0.0708997	-0.0835076	0.6905	0.0579057	0.356906
ENSG00000079156	Q9BZF3	OSBPL6	6	0.207957	-0.0985186	-0.353882	-0.322079	-0.470004	-0.171641	0.122584	-0.478907	0.294341	-0.0983037	0.317546	0.089679	-0.0853366	0.261881	0.125357	0.0718186	0.0998389	0.15917	-0.132113	0.38612	0.0896864	-0.346726	0.335183	-0.00365241
ENSG00000079215	P43003	SLC1A3	1	-0.0683546	-0.0739227	0.01388	0.125807	-0.61463	0.289458	0.903568	0.609672	0.751127	0.104367	-0.341325	-1.12226	0.648465	1.18684	0.29281	-0.112223	-0.0732405	-0.17915	0.232817	-0.577741	0.260288	-0.964571	-0.24687	-1.04482
ENSG00000079332	Q9NR31	SAR1A	5	0.192819	-0.130321	-0.0381875	-0.0600915	-0.134807	-0.267386	0.202592	0.0375914	0.146479	-0.0730421	0.0140797	-0.0388637	0.127916	-0.0343446	0.0530504	-0.0625883	0.056019	-0.0270762	0.0657314	-0.0904474	-0.0266632	-0.0153479	0.0616182	0.0412716
ENSG00000079459	P37268	FDFT1	4	0.140456	0.21793	0.203659	0.190376	0.256977	-0.411044	-0.138351	-0.0912794	0.162165	0.0137824	-0.0405587	-0.328384	0.119796	0.0854147	-0.0722578	0.222405	0.0160605	-0.0451313	0.100185	-0.0352393	0.299433	0.0651819	-0.504405	-0.42717
ENSG00000079616	Q14807	KIF22	1	0.364614	0.477212	0.0826569	-0.0416448	0.347573	0.116836	-0.190216	-0.359107	-0.246837	-0.028184	0.11905	-0.14708	-0.0171228	0.0305634	-0.352054	-0.310089	0.222211	0.145322	0.0666089	-0.128678	0.0782073	0.0572635	-0.0532562	-0.233851
ENSG00000079691	Q5VZK9	CARMIL1	3	0.359578	0.182848	-0.339541	0.582951	-0.529024	-0.264458	0.177917	-0.563726	0.0806282	-0.380698	0.595715	-0.762602	-0.00121774	-0.640408	0.346173	-0.0776014	0.45494	-0.2868	0.388136	-0.00623437	0.103181	0.625103	-0.0636248	0.018765
ENSG00000079739	P36871	PGM1	1	0.586911	0.470286	0.816588	0.097661	-0.978131	0.163615	0.360915	-0.745148	-0.0353483	-0.651603	-0.455511	0.204866	0.134879	-0.511422	0.726221	0.132274	-0.37623	-0.310214	0.38358	-0.245429	0.558748	-0.381245	-0.396928	0.450664
ENSG00000079819	O43491	EPB41L2	2	0.32789	-0.0884187	0.00552707	0.220374	-0.941602	-0.0127691	0.216059	-0.753423	0.563119	0.652699	-0.0204413	-0.626676	-0.0292685	0.816003	0.253354	0.155303	-0.057516	-0.433983	-0.0409499	0.348432	0.198978	-0.0989694	-0.284573	-0.369149
ENSG00000079931	Q6UVY6	MOXD1	2	-0.105658	0.0476097	0.00974721	-0.323801	0.407422	0.525263	-0.0601478	-0.124932	0.595299	-1.37975	0.302042	0.441212	0.123721	-0.0147006	0.0638771	-0.13437	0.341958	-0.0314022	-0.355464	-0.0256731	-0.367007	-0.244425	0.346682	-0.0375067
ENSG00000079950	O15400	STX7	9	-0.223669	-0.564768	0.319885	-0.2455	0.471942	0.101575	0.115811	0.153289	0.43218	0.40108	-0.23528	-0.0548123	0.0045942	0.118633	-0.335007	0.246027	-0.382278	0.198745	-0.783047	-0.0193006	-0.80695	0.278743	0.517529	0.290579
ENSG00000079999	Q14145	KEAP1	2	0.163331	0.39589	-0.219971	-0.287915	-0.424523	0.00242232	0.108712	-0.700249	0.209668	-0.832015	0.408327	0.0686728	0.48546	0.115416	0.121775	-0.331427	0.392892	-0.182654	-0.0692207	0.104006	0.0423846	0.0761758	0.0422217	0.31062
ENSG00000080298	P48380	RFX3	1	-0.170742	-0.275966	-0.00913145	-0.0788871	0.26086	0.202911	0.10325	-0.270635	0.114084	0.236532	0.116277	-0.261571	-0.0606654	0.143441	0.193193	0.0258569	0.208433	-0.0610304	0.0910562	-0.259503	-0.0579259	0.0150708	-0.0149055	-0.190002
ENSG00000080345	Q5UIP0	RIF1	1	0.52232	-0.114443	0.0351768	0.295547	-0.0403705	-0.277834	-0.110342	-0.287629	-0.170868	-0.349934	0.325406	0.198171	0.0943815	-0.166877	0.0426058	-0.103859	0.244076	-0.258129	0.235985	0.0335263	-0.00231734	-0.0235392	0.0207043	-0.141758
ENSG00000080503	P51531	SMARCA2	8	-0.141145	-0.504981	0.249	-0.121249	0.14095	-0.029492	0.308495	-0.248667	0.159008	-0.212761	-0.143929	0.0946845	-0.069415	-0.244089	0.135328	0.159396	0.23972	0.0654051	0.148631	-0.0159895	0.172884	0.0192832	-0.120519	-0.0405503
ENSG00000080845	Q9Y2H0	DLGAP4	9	-0.264465	-0.156155	-0.442952	0.0110146	-0.274097	-0.245436	-0.0765827	0.267558	-0.00668678	0.227058	0.0568045	0.00160449	-0.0768812	0.0605496	-0.0025516	0.175735	0.297473	0.195419	-0.0544014	-0.00517716	-0.0848897	0.00322472	0.1616	0.232236
ENSG00000080986	O14777	NDC80	1	0.106005	0.33321	2.23889	-0.0300013	1.30685	-1.41981	0.110044	-1.29023	-0.167659	-1.4869	0.108276	-0.165652	0.104677	-0.162626	-0.100648	0.0818232	0.837273	0.185986	-0.0405349	-0.386512	0.483371	-0.617942	0.179058	-0.206944
ENSG00000081154	Q8WW12	PCNP	2	0.0727124	0.0991205	-0.239326	0.0473686	0.0839782	-0.0327447	0.070088	-0.332904	0.0280725	-0.200513	0.0442949	0.12949	-0.00426493	-0.18178	0.125861	-0.0852463	0.151464	0.155381	-0.216294	-0.0939924	0.112169	-0.108322	0.12918	0.246206
ENSG00000081177	Q9NVH0	EXD2	8	-0.539189	-0.326446	-0.227279	-0.0795927	-0.318861	-0.222143	0.00404788	0.0267194	0.023533	0.174231	0.0294727	0.437118	0.18768	0.200448	-0.149023	0.238325	0.112254	0.357918	-0.172573	0.224633	-0.612618	0.374698	-0.0074527	0.264099
ENSG00000081181	P78540	ARG2	7	0.386909	0.0138989	0.664536	-0.0506606	0.192544	0.21797	-0.659698	0.310341	-0.332025	0.0488288	-0.116457	0.108967	-0.434882	0.371416	-0.0400733	0.319423	0.114954	0.28658	-0.695388	-1.07092	0.633328	0.0510012	-0.238701	-0.0818876
ENSG00000081721	Q9UNI6	DUSP12	9	-0.377988	-0.0278381	-0.113557	-0.290358	0.205702	0.076877	-0.372396	0.059887	-0.35675	0.157515	-0.0504906	0.121994	-0.30866	-0.08348	-0.329852	0.364015	-0.00333201	0.368555	-0.0321944	0.21718	-0.194851	0.30807	0.0901941	0.571759
ENSG00000081760	Q86V21	AACS	5	-0.255958	0.0073818	0.415078	0.151296	0.199152	-0.164985	0.0192339	0.728943	-0.0855431	0.855566	-0.395112	-0.336328	-0.322345	0.537627	-0.383833	-0.460489	0.125579	0.400465	-0.339413	-0.287939	-0.0920821	0.154513	-0.234602	-0.236205
ENSG00000081913	O60346	PHLPP1	1	0.173306	-0.150165	-0.0293784	0.186435	0.268025	0.0248039	-0.113578	-0.169762	0.0761949	0.0786782	0.468125	0.0668658	0.0981038	0.249406	-0.0437314	-0.542318	0.223762	-0.342412	-0.0316961	-0.161383	0.172685	-0.21488	-0.0334202	-0.253668
ENSG00000082153	Q7L1Q6	BZW1	4	0.312849	-0.101712	0.254127	0.254361	0.00544332	-0.0502862	0.239049	0.0903997	0.349165	0.0793067	-0.0333149	0.0571346	0.328518	0.273726	-0.128626	-0.147538	-0.13868	-0.168794	-0.0176457	-0.478865	-0.16747	-0.379819	-0.251464	-0.179866
ENSG00000082212	P23368	ME2	6	0.200172	-0.160383	0.0494334	-0.0399445	-0.372506	-0.193538	-0.12843	0.183903	-0.120567	0.143042	0.0889266	-0.0791726	0.106385	0.327822	0.147097	-0.066768	0.145307	-0.229528	0.110105	-0.330821	0.205945	0.195557	-0.0193555	-0.162681
ENSG00000082258	O60583	CCNT2	5	-0.081027	-0.201777	0.106168	-0.339907	0.320102	0.16819	-0.221219	0.00133131	-0.157531	-0.0368347	-0.0343554	0.573998	-0.0676584	-0.216531	-0.130816	0.429736	-0.0568945	0.268651	-0.624862	0.0132829	0.125398	0.364482	-0.231127	0.0292004
ENSG00000082397	Q9Y2J2	EPB41L3	7	0.19388	0.30841	0.508958	0.530309	-0.656722	0.112664	0.122181	0.225696	0.0563821	0.156975	-0.245061	0.133045	0.255992	0.0903168	-0.183266	-0.0124954	-0.401224	-0.141492	-0.24596	0.183769	-0.241975	-0.217968	-0.482415	-0.0499986
ENSG00000082458	Q92796	DLG3	9	-0.0848932	-0.220366	0.291857	-0.192795	0.165315	0.0394271	-0.378936	0.37937	-0.125945	0.0882037	-0.0721085	0.0317688	-0.236943	0.226605	-0.26271	-0.320548	0.391745	0.229521	0.00608872	0.227318	-0.157425	-0.143612	-0.0420562	0.16112
ENSG00000082516	Q8TEQ6	GEMIN5	1	0.1498	-0.0792118	0.00231564	0.383229	-0.230928	-0.0942588	0.139131	-0.312515	0.00831748	-0.110157	0.0498036	-0.106515	0.149453	0.0633548	-0.297351	-0.0694331	0.0684767	-0.399695	-0.0498289	0.196816	0.213571	0.323106	0.118123	-0.115603
ENSG00000082684	Q9P283	SEMA5B	1	0.0159042	0.337255	-0.376267	0.379327	0.185901	0.317882	-0.0683266	-0.187447	0.155491	-0.110449	0.0803282	-0.367986	-0.0725557	-0.34109	0.103773	0.421528	0.0849439	0.0883701	-0.218879	-0.153439	-0.247493	-0.101051	-0.055209	0.129489
ENSG00000082701	P49841	GSK3B	9	-0.200108	-0.163332	0.232595	0.0981325	0.177965	0.0203998	-0.351387	0.202892	0.00549982	0.0491215	0.0853596	0.0650318	0.00709377	0.32488	-0.0964683	-0.0866655	-0.265027	-0.028907	0.149649	-0.220542	0.0234496	-0.0315124	-0.125093	0.126972
ENSG00000083312	Q92973	TNPO1	4	0.371135	0.0493565	-0.196488	0.458771	0.0154523	-0.231597	0.0175606	-0.000341527	-0.0174727	0.13977	0.167912	0.268376	0.207557	0.115261	-0.234021	-0.148377	-0.0665628	-0.0690059	-0.132803	-0.263063	-0.0450035	-0.164409	-0.183211	-0.0587962
ENSG00000083520	Q9Y2L1	DIS3	8	-0.00621611	-0.111441	0.197996	-0.325593	0.174515	0.0747343	-0.47206	-0.213156	-0.0434039	-0.0805206	0.0238103	0.214239	-0.0733982	0.0080989	-0.173956	0.149542	0.253783	0.231127	0.00285744	0.0676294	0.121963	-0.0700547	-0.0043482	0.0538525
ENSG00000083642	Q9NTI5	PDS5B	4	-0.0482024	-0.415864	0.190435	0.00244132	0.40337	-0.0821875	-0.279982	0.241534	-0.258248	0.0667654	0.245627	0.00182972	-0.0369579	0.214005	-0.0599103	-0.116825	-0.0842686	-0.0106209	0.0885215	-0.0705666	-0.0402236	0.171258	0.00511685	-0.127047
ENSG00000083720	P55809	OXCT1	7	-0.372003	-0.247971	0.568547	-0.265112	0.157842	0.148027	0.0584231	0.5362	0.0467343	0.484632	-0.260328	0.130899	-0.117863	0.674429	-0.0138279	-0.0732378	-0.17376	0.228004	-0.382917	-0.407851	-0.186167	-0.145355	-0.454275	0.066929
ENSG00000083750	Q5VZM2	RRAGB	8	-0.122225	-0.539342	0.568428	-0.342268	0.185946	0.464243	0.177577	0.20968	0.150549	-0.0374467	-0.186565	-0.220207	-0.177476	0.398022	-0.12431	0.367643	-0.426414	0.175453	-0.375988	0.236856	-0.153627	0.434842	-0.622272	-0.0410967
ENSG00000083799	Q9NQC7	CYLD	9	-0.275253	-0.0733699	0.166194	-0.0421996	-0.240785	-0.0639879	0.267472	-0.111301	-0.283645	-0.293274	-0.0950922	0.47759	0.227696	-0.122372	-0.53447	0.265936	0.198087	-0.10995	0.22099	0.209975	0.12442	0.233892	-0.213082	0.066529
ENSG00000083937	Q9UQN3	CHMP2B	5	0.165032	-0.15142	-0.0607357	-0.198217	-0.69942	-0.144265	0.197499	-0.577947	0.231383	-0.11666	0.153224	-0.350407	-0.117389	-0.619891	0.458749	-0.367165	0.31709	-0.0564658	0.295622	0.421794	0.517065	0.52099	0.0784181	0.103117
ENSG00000084070	Q8WU79	SMAP2	9	-0.319431	0.200083	0.385942	0.567446	0.253853	0.062675	0.189158	0.504695	0.527209	0.678033	-0.297645	0.0295966	-0.0909019	0.435576	-0.397401	0.195641	-0.534905	0.0393966	-0.328796	-0.206785	-0.435615	-0.29481	-1.09833	-0.0646856
ENSG00000084072	Q9UNP9	PPIE	1	0.113823	0.227693	-0.183032	-0.0395889	0.0331694	-0.328916	0.275572	-0.0970734	0.159708	-0.0213617	-0.133704	0.158497	0.120244	-0.352358	0.0362314	-0.0304064	0.0619386	0.154442	-0.129624	0.133305	-0.0765848	-0.137647	-0.162137	0.217812
ENSG00000084207	P09211	GSTP1	3	0.466318	0.389422	0.146952	0.391878	-0.573816	-0.151822	0.451537	0.643124	0.246885	0.333621	-0.448056	-0.263712	0.293623	0.494005	-0.0348419	-0.191021	-0.519561	-0.24655	0.227977	-0.143902	-0.101448	-0.494143	-0.470015	-0.446453
ENSG00000084652	P40222	TXLNA	1	0.0555874	0.0087043	-0.421475	0.216799	-0.232867	-0.0366387	0.284496	0.20575	0.105096	-0.139433	0.303734	-0.067722	0.0866703	-0.305787	0.145727	0.0346048	0.219804	0.0983173	-0.190369	-0.0168403	-0.129863	-0.0885034	0.0472701	-0.183059
ENSG00000084733	P61026	RAB10	8	-0.128078	-0.446402	-0.00879229	-0.0939485	0.0301365	-0.170587	-0.189523	-0.0662913	-0.00488871	0.0778304	0.06728	0.00368916	0.0658776	0.225304	-0.111843	-0.0744184	0.103274	0.0408591	-0.250548	-0.110147	0.199464	0.435241	0.195895	0.210617
ENSG00000084754	P40939	HADHA	1	-0.0924354	0.262939	-0.311795	0.0704243	0.0430194	0.0408022	-0.252488	-0.186982	-0.240096	-0.054559	-0.0929409	-0.185578	-0.0851975	-0.0597185	-0.00604317	-0.0811115	0.191669	-0.181268	0.24291	-0.156837	0.532577	0.214122	0.398934	-0.0103475
ENSG00000084764	Q9UPY8	MAPRE3	9	-0.490453	-0.272042	-0.184783	-0.757587	-0.210443	-0.0941001	-0.130966	-0.144436	0.543036	0.528576	-0.343402	0.344603	-0.189323	0.134283	-0.242009	0.22515	-0.131655	0.0524972	0.351657	0.306504	-0.0159246	0.303758	0.209049	0.208009
ENSG00000084774	P27708	CAD	1	0.540763	1.14746	-0.492106	0.781672	-0.354559	-0.270957	-0.147735	-0.154025	0.103371	0.14067	-0.156123	-0.449267	0.540545	-0.194817	0.0434879	-0.0480523	0.0161034	-0.260096	-0.183223	-0.233618	-0.0522761	0.0586209	0.086127	-0.461965
ENSG00000085224	P46100	ATRX	8	-0.239258	-0.328822	0.345421	-0.365343	0.101964	0.214165	-0.463812	0.32505	-0.459974	0.155055	-0.129241	0.348993	-0.400308	0.474748	-0.322871	0.117001	-0.118821	0.0568597	-0.254503	0.0476767	0.0805188	0.637399	-0.0634993	0.241603
ENSG00000085365	O15126	SCAMP1	7	-0.193975	-0.644785	1.22947	-0.170509	0.336548	0.593127	-0.235458	0.391531	0.170191	0.60327	0.201587	0.223963	-0.492483	1.04857	-0.762848	0.0772171	-0.480733	-0.00604046	-0.0188058	-0.619526	-0.270197	-0.0851292	-0.674804	-0.220182
ENSG00000085377	P48147	PREP	9	0.0889514	0.230019	0.100515	-0.616121	0.282106	-0.038427	0.374291	0.360783	0.379295	0.251398	-0.476405	-0.11838	0.235399	0.000964274	-0.218332	0.0869499	-0.177361	0.195905	-0.615561	0.111298	-0.485573	-0.122738	-0.173703	0.344726
ENSG00000085433	O94967	WDR47	8	-0.0451356	-0.29664	0.493985	-0.291591	0.32728	0.347	-0.120227	0.00646767	-0.0945773	0.157107	0.121704	0.0767233	-0.0208973	0.297004	-0.369953	-0.316907	-0.00339284	0.10728	-0.0579631	0.0751446	-0.149023	-0.137803	-0.0919953	-0.0135901
ENSG00000085491	Q6NUK1	SLC25A24	6	0.275883	-0.148743	-0.598302	0.0828506	-0.381634	-0.415374	0.0307524	0.161507	0.42941	-0.239269	0.171656	0.407519	0.152915	-0.466468	-0.0507443	-0.0372056	0.22686	0.382106	-0.0817149	-0.262932	-0.198246	0.314274	0.283936	-0.0390371
ENSG00000085662	P15121	AKR1B1	4	0.371154	0.147968	0.283268	0.284401	0.0236112	0.25563	0.20632	6.28e-05	0.28342	0.0300053	-0.690826	-0.228435	0.135322	0.28802	-0.033381	0.0803038	-0.537435	-0.238374	-0.20053	-0.100903	-0.0706885	0.337127	-0.509211	-0.116829
ENSG00000085832	P42566	EPS15	5	-0.191056	-0.438152	0.198881	-0.433891	0.140989	0.291159	-0.273266	-0.00733486	-0.145081	0.322198	-0.105818	0.312631	-0.100621	0.455519	0.112299	0.239855	-0.0649441	0.427029	-0.058184	-0.00410277	-0.377336	-0.170667	-0.25482	0.124713
ENSG00000085872	Q8IWX8	CHERP	3	0.107932	-0.149824	0.0343962	-0.0561097	-0.0802711	-0.286261	-0.0874006	0.0241321	-0.0440206	-0.0194786	-0.0203402	0.219822	-0.00824511	-0.0183996	-0.165348	0.120763	0.0280691	0.295621	-0.148048	0.0844145	-0.137129	0.0917983	-0.0305882	0.244516
ENSG00000086065	Q9NZZ3	CHMP5	8	-0.339148	-0.268232	0.387689	-0.349192	0.259926	0.289971	0.181072	0.358449	0.0689406	0.394031	-0.262141	-0.0276794	-0.181221	0.387883	-0.133923	0.309524	-0.0640025	0.0728091	-0.348468	-0.175936	-0.191137	0.0636506	-0.352245	-0.0806199
ENSG00000086189	Q9UNQ2	DIMT1	5	0.0436618	0.00561589	-0.00300248	-0.198755	0.22817	-0.0505323	-0.226737	-0.122552	-0.0630672	-0.0192877	-0.148687	0.141718	-0.246729	-0.0376414	-0.113999	0.0530111	-0.0943394	0.207723	0.0178634	-0.0358968	0.165064	0.252313	0.00740048	0.238685
ENSG00000086200	Q9UI26	IPO11	1	0.454135	0.14653	-0.106608	0.668401	-0.432014	-0.294894	0.156644	-0.222969	0.249843	0.0705914	0.0414258	0.137666	0.467246	0.104473	0.0239992	-0.461491	-0.111899	-0.29627	0.140124	-0.395269	0.0118084	-0.179298	0.0949074	-0.26708
ENSG00000086589	Q9NW64	RBM22	5	-0.153921	-0.275396	0.000838956	-0.0203783	0.110555	-0.194977	0.0823435	-0.0457439	-0.0202352	-0.0607968	0.0668568	0.146988	-0.0122493	-0.160044	0.0447324	0.229836	-0.0757708	0.0991479	0.0709908	0.0371738	-0.00809896	-0.0372396	0.0282677	0.14712
ENSG00000086712	Q9NUQ3	TXLNG	7	-0.239722	-0.276302	-0.0266661	-0.161846	0.414638	0.0546499	-0.210864	-0.0535664	-0.100093	0.0702311	-0.0103353	0.335038	-0.109839	-0.147211	-0.351677	0.178337	0.12726	0.252138	-0.210816	0.0353338	-0.00731653	0.194096	-0.0105192	0.255052
ENSG00000086827	O43264	ZW10	3	0.196297	0.881874	-0.0566639	0.182574	-0.216653	-0.261632	0.162596	0.320109	0.0690882	-0.0648923	0.340775	-0.274669	0.134953	0.310508	0.348498	0.132746	0.0264324	-0.161027	-0.0282601	-0.636315	0.0865134	-0.701834	-0.449615	-0.341403
ENSG00000087053	Q13614	MTMR2	8	-0.407642	-0.205131	0.152283	-0.394128	0.00258528	0.0950301	-0.306249	0.212319	-0.2559	0.210292	-0.0108485	0.12621	-0.153213	0.123802	-0.273662	0.139926	0.112699	-0.00666182	0.0745759	0.171709	0.0549149	0.239356	0.0744885	0.223243
ENSG00000087077	Q15654	TRIP6	1	0.033724	-0.0871113	-0.483569	0.780411	0.610738	-0.242547	-0.00570063	-0.88371	0.257671	-0.137479	0.222652	-0.381759	0.0885443	-0.0577833	0.038449	0.105478	-0.106198	0.0915419	-0.450834	0.0553114	0.233291	0.534859	0.112464	-0.328444
ENSG00000087086	P02792	FTL	6	-0.293925	-0.216677	-0.337369	0.0421651	0.0238544	-0.270777	0.346335	-0.154607	0.102755	0.12108	-0.0584474	-0.0510976	0.27308	-0.037907	-0.00126602	0.247546	0.258322	0.1756	-0.169433	-0.170937	-0.218754	-0.0485585	0.397084	0.0419338
ENSG00000087087	Q9BXP5	SRRT	5	0.260119	0.176186	0.0338958	0.127559	-0.185172	-0.125546	0.178828	0.0137186	0.0176734	-0.0512129	-0.184781	-0.133753	0.133867	0.0265905	-0.033557	-0.0668223	-0.114815	-0.0143564	0.0651352	0.0294689	0.0467283	-0.0691395	-0.0314617	-0.0991532
ENSG00000087111	Q96S52	PIGS	4	0.156463	0.0246941	0.378116	0.253995	0.0464141	0.172098	0.247615	0.575354	0.210963	0.589109	-0.474958	-0.192731	0.0648456	0.551172	-0.191729	0.0264893	-0.433085	-0.0623106	-0.460538	-0.11739	-0.438481	-0.413372	-0.358092	-0.154642
ENSG00000087258	P09471	GNAO1	9	-0.178404	-0.232521	-0.133991	-0.0679139	-0.121241	-0.00445344	-0.319739	-0.1189	0.0114173	0.0142599	-0.0646907	0.0980932	-0.163141	0.0310561	-0.393294	0.143824	-0.0542625	0.195726	0.253848	0.62793	0.0357012	-0.0584481	0.100576	0.398569
ENSG00000087274	P35611	ADD1	6	-0.218346	-0.33064	0.0907153	-0.252683	-0.0104718	0.0139674	0.0606147	0.307698	0.122245	0.394425	-0.131184	-0.023279	-0.0714848	0.250326	0.0511357	0.0280535	-0.0663215	0.082887	-0.109716	-0.117633	-0.0649633	0.0267129	-0.10694	0.0748825
ENSG00000087301	Q9P2K2	TXNDC16	5	-0.145441	-0.153065	-0.00165723	-0.0465416	0.260403	0.0171254	0.325172	0.352329	0.232896	0.165559	-0.353662	-0.0943114	-0.0732104	0.14322	0.120619	0.420273	-0.476333	-0.264324	-0.0480472	-0.00504865	-0.238352	0.15771	-0.143196	-0.152117
ENSG00000087365	Q13435	SF3B2	2	0.101041	0.0405513	-0.0323417	0.0764399	-0.155308	-0.241283	0.117569	0.0314489	-0.0866765	-0.0700005	-0.00589407	-0.0269549	0.23168	0.115776	0.00795208	-0.117043	0.0644481	0.012983	0.0142591	-0.176714	0.0466042	-0.186325	0.205944	0.0318446
ENSG00000087460	Q5JWF2	GNAS	9	-0.0765403	-0.596718	0.3144	-0.0715145	0.282078	0.229871	-0.0351408	0.406782	-0.029409	0.286898	-0.414228	-0.105717	0.0215323	0.386953	-0.240046	0.118738	-0.559356	-0.0489388	0.13383	-0.144901	0.166508	0.250471	-0.173419	-0.102131
ENSG00000087470	O00429	DNM1L	9	0.0458696	0.103191	0.406	-0.412132	0.0662772	0.188539	-0.110781	0.321058	-0.198872	0.231062	-0.229498	0.00568805	-0.135566	0.280069	-0.0357802	0.13998	-0.213035	0.118898	-0.171312	-0.200043	-0.0165755	0.187709	-0.211731	-0.159014
ENSG00000087510	Q92754	TFAP2C	1	0.0641807	0.235816	0.705741	0.0860126	-0.182511	0.453268	-0.610412	-0.536847	-0.502432	0.640083	0.200029	-0.331272	-0.12938	-0.610286	0.455247	-0.0201449	0.110771	-0.0682758	0.0564613	0.186374	-0.151958	0.171453	0.589707	-0.811626
ENSG00000087842	O00625	PIR	2	0.206055	0.200899	0.495754	0.248851	-0.0611677	-0.00175864	-0.152177	0.0611833	0.400618	0.0498109	-0.409687	-0.933023	0.758465	0.128689	0.781558	0.521463	-0.257179	-0.316025	-0.0548519	-0.0759956	0.138041	-0.344148	-0.850586	-0.534789
ENSG00000088205	Q9NVP1	DDX18	5	0.31248	0.0377383	0.00924302	-0.175316	-0.0216967	-0.181373	0.0179291	-0.109075	-0.142402	-0.158599	0.140549	0.0178374	-0.0512152	-0.139876	-0.0816945	0.110375	0.0841408	-0.0436479	0.0484815	0.114581	0.114484	-0.0274689	0.0467218	0.0778029
ENSG00000088247	Q92945	KHSRP	3	0.118733	0.08937	0.130599	0.0199248	0.0781635	-0.0283333	0.080939	-0.0406386	-0.108925	-0.123285	-0.0813128	-0.0852054	0.128356	-0.087961	0.106733	-0.218486	0.0334758	-0.0827115	0.076531	0.0932912	0.210896	-0.0145695	-0.254323	-0.0412605
ENSG00000088280	Q8TDY4	ASAP3	1	0.157763	0.442959	-0.345791	0.44453	0.190521	0.0231529	-0.00815643	-0.267556	0.288944	0.417637	-0.200916	-0.193664	0.57873	0.146561	0.394372	0.201212	-0.451232	-0.748466	-0.572113	-0.15602	-0.318839	0.225535	0.167689	-0.416856
ENSG00000088305	Q9UBC3	DNMT3B	4	0.675348	0.746869	-0.142389	0.441707	0.133689	0.216646	0.321058	-0.337247	-0.0893784	-0.251532	-0.0348719	-0.125396	0.77401	0.121766	-0.551213	-0.382723	0.237204	-0.366088	-0.189387	-0.138439	-0.6351	-0.343797	0.0964687	-0.177204
ENSG00000088367	Q9H4G0	EPB41L1	9	-0.0904777	0.376643	0.329007	0.335793	0.167856	0.0501233	-0.294126	0.398626	0.604497	0.350328	0.0767145	-0.0956571	-0.0477905	0.459513	0.239784	-0.184563	-0.526187	-0.240014	-0.379027	-0.123984	-0.610042	-0.373293	-0.27086	-0.152863
ENSG00000088538	Q8IZD9	DOCK3	8	0.235336	-0.385278	0.438004	-0.0559207	0.226547	0.184849	-0.345903	0.251095	0.187769	0.290035	0.121089	0.196325	-0.228093	0.429285	-0.390593	-0.765328	-0.078014	-0.296296	0.0914214	-0.148347	0.197942	-0.0095203	-0.0946466	-0.0517599
ENSG00000088808	Q96KQ4	PPP1R13B	7	0.080244	-0.205002	0.132288	0.0170572	0.21399	0.199256	-0.252013	0.164817	0.0974321	0.201307	-0.293065	-0.0246878	0.201613	-0.0688802	-0.328108	-0.330563	-0.316255	-0.14416	0.0618741	0.0931321	0.432395	0.0178046	-0.0690919	0.118616
ENSG00000088832	P62942	FKBP1A	7	-0.0743883	0.266888	0.460513	-0.181263	-0.139313	0.180156	0.210083	0.483988	0.137481	0.637525	-0.389237	0.0184404	0.288461	0.670065	-0.0749867	0.396054	-0.314797	0.0430246	-0.803988	-0.368246	-0.568182	-0.1945	-0.50491	-0.178868
ENSG00000088833	Q9UNZ2	NSFL1C	6	0.124047	-0.321136	-0.1091	-0.0516391	0.071773	0.0552615	0.113081	-0.0502311	0.104306	-0.0981088	-0.18728	-0.112827	-0.141428	0.076274	0.0262983	0.129929	-0.0560736	0.00928337	0.0225639	0.0444873	0.0215634	0.219554	-0.0464148	0.155816
ENSG00000088888	Q7Z434	MAVS	1	-0.0210156	-0.160225	-0.50541	-0.0802275	-0.374598	-0.613179	0.285247	0.0154851	0.16484	-0.181504	0.382998	-0.0447353	0.376471	0.143066	0.358378	-0.173541	0.475368	-0.239442	0.0180146	-0.341824	0.289343	0.219602	0.175471	-0.168583
ENSG00000089006	Q9Y5X3	SNX5	1	0.194948	0.346125	0.211178	-0.25075	0.0320942	0.0437484	-0.0251702	-0.479826	-0.0744356	-0.00441945	0.387098	-0.0732817	-0.026062	-0.310111	0.285419	0.123344	0.458039	0.0820735	-0.48188	-0.366083	0.167601	-0.244876	0.230066	-0.224839
ENSG00000089009	Q02878	RPL6	3	0.400876	0.584854	-0.570716	0.301251	-0.322611	-0.624427	0.155378	0.17728	0.0634443	0.185147	0.00682178	0.144984	0.107435	-0.114462	-0.0136746	-0.386314	0.102538	0.184489	0.051758	-0.3667	-0.0499373	-0.418051	0.285164	0.115473
ENSG00000089048	Q9H501	ESF1	5	0.0404763	-0.0095793	-0.0201963	-0.147887	-0.227189	-0.149124	0.2632	0.109667	-0.153505	0.116422	-0.075135	-0.0451155	-0.0319053	-0.188119	0.0157257	0.151409	0.187959	0.231972	-0.0464117	0.0396812	-0.0913205	-0.0866044	0.0672671	0.0483117
ENSG00000089053	Q9UJX4	ANAPC5	5	-0.0443746	-0.0440006	0.136297	-0.00948548	-0.0195965	0.0453717	0.0330986	0.274382	0.0176474	0.347322	-0.222448	-0.160949	-0.126662	0.531772	0.088982	0.0941639	-0.137454	-0.0470814	-0.0350533	-0.213227	-0.0101266	-0.0727034	-0.367096	-0.0587786
ENSG00000089094	Q8NHM5	KDM2B	9	-0.1638	0.0348682	-0.466473	0.611947	0.00986215	-0.154192	0.0533561	-0.0674312	0.124058	0.0886062	0.405249	-0.00178728	0.241235	-0.397774	0.0137713	-0.723165	-0.0653373	-0.288816	0.346031	-0.0750669	0.415651	0.135671	-0.140136	0.0636736
ENSG00000089220	P30086	PEBP1	9	0.100101	-0.24552	0.325401	-0.083069	-0.0697419	0.309715	0.0558977	0.581882	-0.165616	0.501894	-0.769209	0.0629305	0.153759	0.451852	-0.156694	0.347954	-0.669846	0.0537043	-0.11996	0.0766203	-0.285266	0.253369	-0.681218	-0.0289389
ENSG00000089351	Q96CP6	GRAMD1A	8	-0.572893	0.216621	0.137723	-0.347421	0.28966	0.250087	-0.105406	0.414726	-0.177563	0.171738	-0.0533515	0.0949115	-0.269464	0.0425209	-0.0963161	0.0894386	0.0157019	0.194386	-0.316082	-0.0785407	-0.270411	-0.121142	0.259006	0.23207
ENSG00000089597	Q14697	GANAB	1	0.128091	0.211096	-0.262789	0.262243	-0.143374	-0.0563777	-0.037908	-0.0838893	0.0576196	0.0752409	-0.0843307	-0.0748513	0.0363727	0.0368566	0.217612	0.0152517	0.0336912	-0.122022	-0.000592079	0.204878	-0.139027	0.0164483	-0.0370545	-0.253186
ENSG00000089639	Q9P107	GMIP	7	-0.125008	0.0324012	-0.167747	-0.255041	-0.0262928	0.211738	-0.133141	0.11418	0.315352	0.121153	0.241969	0.183982	0.268988	-0.0667058	-0.137186	0.310389	-0.182816	0.0279223	-0.0859874	-0.0599967	-0.560323	-0.144343	0.013502	0.103011
ENSG00000089723	Q96DC9	OTUB2	7	-0.246475	-0.499105	0.570107	0.460279	0.844786	0.532999	-0.486161	1.07004	-0.0328004	0.736751	-0.301885	0.164079	0.00843076	0.563304	-0.395845	0.0800397	-0.596749	0.314741	-1.16993	-0.297302	-0.314683	-0.364969	-0.45349	-0.186161
ENSG00000089737	Q9GZR7	DDX24	5	-0.0533663	-0.129948	0.472497	-0.242989	0.180362	0.218364	-0.159484	0.0505298	-0.0740854	0.0615361	-0.230537	0.175568	-0.101353	-0.0467899	-0.247824	0.218103	-0.241636	0.143341	-0.0658096	0.183656	-0.157068	0.176293	-0.302156	0.172796
ENSG00000089902	Q9UKL0	RCOR1	6	-0.299327	-0.517842	-0.519702	-0.0441084	-0.379071	-0.247984	0.0729542	0.339461	0.0796535	0.434494	0.0627947	0.195488	0.273312	0.158601	-0.0952048	-0.00610828	-0.00689991	0.21688	0.0672059	-0.0258484	0.123233	0.0420962	-0.070585	0.146505
ENSG00000090054	O15269	SPTLC1	1	0.0950256	0.35758	0.17019	-0.243027	-0.194054	-0.274097	0.160596	0.316451	0.0985961	-0.38991	0.0417894	0.618387	-0.0892307	-0.363297	-0.0405314	-0.13588	0.134977	0.0346378	-0.141571	-0.447572	0.432856	-0.125156	-0.0432353	0.0264768
ENSG00000090060	P51003	PAPOLA	1	0.342831	0.1838	-0.263078	0.278227	-0.0722723	-0.269671	0.478523	-0.147474	0.364312	-0.0768889	-0.074536	-0.326557	0.452885	-0.135873	0.161944	-0.212735	-0.060923	-0.265009	0.111844	-0.299562	0.252777	-0.212814	0.0367681	-0.246518
ENSG00000090263	Q9Y291	MRPS33	9	-0.392139	-0.284349	0.286688	-0.513154	0.339508	-0.00888142	0.26121	0.439061	0.177983	0.429607	-0.328351	0.456623	-0.522432	0.221657	0.352163	-0.228537	-0.800038	0.231744	-0.596855	0.0327736	0.0359102	0.152275	-0.269109	0.526642
ENSG00000090316	Q7L5Y9	MAEA	6	-0.256773	-0.0527512	0.00310195	-0.0356509	-0.0324367	-0.402054	-0.0600044	-0.0311781	-0.115539	0.0446895	-0.170541	0.0775665	0.198984	0.0296935	0.119507	0.102155	-0.0974797	0.0414908	-0.0771048	0.316134	0.0398222	0.298263	-0.0115202	0.0716266
ENSG00000090372	Q9NRL3	STRN4	9	-0.233517	0.231291	0.263443	-0.125712	0.210584	0.317709	-0.12624	0.425786	-0.0679273	0.366673	-0.3658	0.0336787	-0.0571665	0.247826	-0.431313	-0.0319681	-0.296511	0.268541	-0.214063	0.0133173	-0.231516	-0.0263948	-0.201376	0.0306582
ENSG00000090686	Q86UV5	USP48	8	-0.107935	-0.0199876	-0.217827	-0.0842113	-0.0422453	-0.152826	0.0296913	-0.0277542	-0.0277952	0.0131038	-0.0694412	0.031972	-0.011981	-0.0964681	0.0699379	0.295397	0.0968867	-0.0479922	-0.237404	0.00240532	0.139074	0.317094	0.000627319	0.147678
ENSG00000090776	P98172	EFNB1	1	0.300053	-0.0493636	-0.790386	1.22874	-1.16026	-1.33782	1.61319	-0.388543	0.595361	-0.263579	0.446191	0.00777293	0.684785	-0.22751	0.596998	-0.0184508	0.408331	-0.224934	0.151032	-0.925361	0.474327	-1.11217	0.221022	-0.229415
ENSG00000090863	Q92896	GLG1	7	0.181572	-0.147112	0.0253347	0.202268	0.0699288	-0.150513	-0.247531	0.0352018	0.0892468	0.07479	0.0343388	0.0642641	0.15228	0.0464553	-0.0351917	-0.344888	0.0880628	-0.208278	-0.0735575	-0.0683895	0.0766153	0.0477561	0.19923	-0.111882
ENSG00000090889	O95239	KIF4A	1	0.640721	0.499965	0.417577	0.528541	-1.65878	0.864456	-0.208261	2.41471	0.0375561	-0.529298	-0.0351921	0.15161	-0.166784	0.432618	-0.315165	-0.378133	0.520388	-0.899699	-0.163979	-1.52659	0.183319	-0.731481	0.445803	-0.523894
ENSG00000090971	Q8WUY8	NAT14	4	0.141724	0.374628	0.775981	-0.106394	0.301093	0.412878	0.096591	0.24803	-0.355405	0.234301	-0.466023	-0.191186	0.126043	-0.0096683	0.143019	-0.00905796	-0.237892	-0.0242563	-0.204108	-0.0152646	-0.325372	-0.280724	-0.422637	-0.206301
ENSG00000090989	Q9NV70	EXOC1	8	-0.405885	-0.162164	0.0339523	-0.555133	0.132774	0.140359	0.0269699	-0.054367	-0.151142	0.02512	-0.0713048	0.121468	-0.0379752	0.107371	0.257781	0.33167	0.0676586	-0.0399387	0.0723798	0.0709735	-0.0668756	0.362131	-0.280409	0.0745859
ENSG00000091009	Q9P2N5	RBM27	1	0.227963	-0.0160868	0.00509147	0.149832	-0.0398454	-0.0772965	-0.106118	-0.181992	-0.106632	-0.100306	0.325297	0.0555946	0.132477	-0.119529	-0.147136	-0.111254	0.220924	-0.162725	0.112903	-0.0625417	0.105749	-0.135256	0.0141354	0.0167542
ENSG00000091039	Q9BZF1	OSBPL8	9	-0.0806438	-0.30184	0.156606	0.153894	0.312206	-0.171546	-0.339682	0.0410188	-0.251388	-0.00690416	0.225922	0.347531	-0.0590119	0.163591	-0.178898	-0.185265	0.0205637	-0.115094	0.0276503	-0.136981	0.118208	0.202146	0.0742347	-0.0163189
ENSG00000091127	Q96PZ0	PUS7	1	0.246191	0.112798	-0.407356	-0.0147448	-0.434822	0.0148571	0.289219	-0.208115	-0.196555	-0.243656	-0.115109	-0.113556	0.0528853	-0.556398	0.00401329	0.166176	0.534621	0.0625114	0.041268	0.231611	0.081269	0.108486	0.262941	0.0814653
ENSG00000091157	Q9Y4E6	WDR7	9	-0.0476599	-0.450812	0.43492	0.163082	0.658619	0.3045	-0.584102	0.538967	0.211749	0.279386	-0.0595833	-0.128466	-0.0920642	0.650412	-0.0587456	-0.521816	-0.337574	-0.0814283	-0.282747	-0.176876	-0.1113	-0.207076	0.150955	-0.252339
ENSG00000091409	P23229	ITGA6	1	0.00246436	0.102889	0.27836	-0.215338	-0.368995	0.607672	-0.0695774	0.0581464	0.117842	-0.0984391	-0.316611	0.0928589	0.157868	0.126748	-0.0526009	-0.492759	0.175359	0.404133	0.563687	-0.296284	-0.0226774	-0.921478	0.243772	-0.0770401
ENSG00000091436	Q9NYL2	MAP3K20	2	-0.122855	-0.0158097	0.244592	-0.491176	-0.178988	-0.581726	-0.499027	0.368749	-0.143183	-0.704176	0.232851	0.0135085	0.163611	0.69304	0.24451	-0.630623	0.145848	0.186394	-0.282237	0.144116	0.397143	0.555959	0.623992	-0.364512
ENSG00000091483	P07954	FH	7	0.292013	0.195468	0.26871	0.280617	-0.0398363	0.212191	0.310993	0.296538	0.337774	0.180836	-0.454799	-0.266918	0.27485	0.526967	0.194137	-0.0488425	-0.467594	-0.21361	-0.184957	-0.15241	-0.318447	-0.368439	-0.46828	-0.386962
ENSG00000091640	O75391	SPAG7	2	0.0542176	0.0913315	0.331559	0.0025482	-0.00378803	-0.239358	0.328768	-0.028518	0.047263	0.193045	-0.04587	-0.118272	-0.0448281	-0.0909927	0.159746	-0.436589	0.147699	-0.0234559	-0.0118046	-0.190939	-0.172967	-0.121101	0.264631	-0.0923258
ENSG00000092036	Q9H6D7	HAUS4	1	0.171118	0.195433	-1.08875	-0.00457277	-0.978341	0.105079	-0.101345	-0.34512	-0.0814098	-0.0173063	0.260979	0.275881	0.151666	0.449059	0.055022	-0.2112	-0.429023	0.403936	0.61145	0.423059	0.00142969	0.218409	-0.174528	0.109075
ENSG00000092051	Q96JJ6	JPH4	8	-0.134563	0.264526	0.0452721	0.493159	-0.229939	0.0584924	0.031424	0.0330982	0.284621	0.253579	-0.123607	-0.246863	0.011787	0.0610704	-0.469668	0.377225	0.045253	-0.312143	-0.214775	-0.0776052	-0.35836	0.255848	-0.19285	0.145017
ENSG00000092094	Q9NPF4	OSGEP	5	-0.0213343	0.017772	-0.0661367	-0.0749678	-0.0179347	-0.154485	0.00142129	-0.0112943	-0.0806232	0.100462	-0.0112206	0.0714195	-0.0312299	0.105671	0.108975	0.222329	-0.0841434	0.0205257	-0.00687522	-0.0928116	-0.0394989	0.179994	-0.356928	0.220914
ENSG00000092201	Q9Y5B9	SUPT16H	1	0.365685	0.305091	0.0151979	0.444808	-0.134613	-0.183366	0.350903	0.10128	0.220544	0.0646111	-0.250814	-0.272713	0.344818	0.104917	-0.125176	-0.298594	-0.153399	-0.211759	0.054202	-0.292307	0.0737033	-0.00900158	-0.293359	-0.220658
ENSG00000092470	Q9H967	WDR76	1	0.629433	0.270215	-0.629251	-0.0438033	-0.172024	-1.01931	-0.27882	0.307614	0.0470752	-0.304312	0.610548	-0.0266688	-0.0947341	-0.158029	0.0483558	-0.756887	0.0580453	-0.215466	1.143	0.239958	0.311982	-0.220468	0.283223	-0.0296806
ENSG00000092621	O43175	PHGDH	1	0.669013	0.492824	0.291533	-0.297886	-0.284559	-0.276554	0.341453	-0.39243	0.283975	-0.781259	-0.473695	-0.517833	-0.0915183	0.142943	0.171157	0.0950438	-0.00965445	-0.326236	0.7937	0.682907	0.637511	-0.448092	-0.188437	-0.513907
ENSG00000092820	P15311	EZR	2	-0.3128	-0.357707	0.105391	0.141959	-0.407953	0.20779	0.0195342	0.304668	-0.0810952	0.341951	0.260049	0.0562557	-0.0684085	-0.103456	-0.18545	-0.175749	0.0672818	0.0974201	0.348424	-0.172719	0.0357206	-0.133835	0.0451889	-0.0324614
ENSG00000092847	Q9UL18	AGO1	3	-0.0508309	-0.0194854	-0.527477	0.357859	-0.375541	-0.343699	0.890812	-0.280892	0.332052	-0.104933	0.191554	-0.209806	0.541281	-0.329114	0.528878	-0.213343	0.102851	-0.179681	0.307543	0.207515	-0.132834	-0.212988	-0.123788	-0.355931
ENSG00000092964	Q16555	DPYSL2	9	-0.0771246	-0.251858	0.131741	-0.0150147	0.223881	0.0482121	-0.00718465	0.295576	-0.0539027	-0.0623587	-0.0789944	-0.0947482	-0.222838	0.314121	-0.181469	-0.309088	-0.147127	-0.161871	0.0027842	0.0930124	0.198484	0.123592	-0.168108	0.400283
ENSG00000093000	Q9UKX7	NUP50	1	0.360504	-0.0173528	0.144768	0.413318	-0.137803	-0.390917	-0.134989	0.0952427	-0.0335893	-0.326566	0.0589805	-0.0927925	0.287576	0.0202335	-0.127443	0.0963163	-0.453654	0.0693788	0.364762	0.24913	-0.0903973	-0.228951	-0.290516	0.164761
ENSG00000093144	Q9NTX5	ECHDC1	4	0.658803	0.220912	0.579964	0.134045	-0.0198302	0.067086	-0.363779	0.113667	-0.172355	-0.0628818	-0.328853	0.200327	0.0714722	-0.38762	0.15817	0.13591	-0.366431	-0.197623	0.0427101	-0.279329	-0.212048	0.0764033	-0.114145	0.045426
ENSG00000094880	Q9UJX2	CDC23	1	0.209821	0.359926	-0.069466	0.289895	-0.178964	-0.252786	0.395202	-0.373439	0.206637	-0.319571	-0.0354145	-0.00182254	0.477656	-0.184432	0.225978	-0.0063205	0.140002	-0.135655	0.0392207	-0.0699264	-0.021062	-0.26745	-0.291374	-0.136654
ENSG00000094916	P45973	CBX5	4	0.252215	0.410344	0.743838	0.196524	0.944758	-0.192009	-0.0807349	0.430463	-0.185396	0.237386	-0.152544	0.00574544	0.215492	0.25151	0.0230437	-0.293044	-0.435156	-1.00783	0.218558	-0.6236	0.0177945	0.0250894	-0.552131	-0.45032
ENSG00000095002	P43246	MSH2	1	0.400885	0.167275	-0.140816	0.239362	-0.118747	-0.185931	0.546136	-0.117863	0.266198	-0.153305	0.0812822	-0.107654	0.43601	0.0117552	0.149179	-0.389182	-0.0753854	-0.261514	-0.0244514	-0.363699	0.243053	-0.173836	-0.374713	-0.0540396
ENSG00000095059	P49366	DHPS	9	-0.216382	-0.214874	0.224751	-0.288321	0.266725	0.273292	-0.409324	0.495572	-0.0978456	0.514053	-0.0984198	0.0675799	-0.268835	0.558385	-0.584588	0.0685896	-0.104526	0.189996	-0.302251	-0.0884831	-0.118721	-0.176383	0.0949701	0.215042
ENSG00000095539	Q9NTN9	SEMA4G	9	-0.879769	0.0377088	0.453529	-0.407919	0.397739	0.0567519	-0.939813	1.04618	-0.87961	0.581168	-0.164351	0.527868	-0.821147	0.16932	-0.624768	0.204199	-0.21911	0.171037	-0.425485	0.427751	-0.173895	0.680775	-0.0619276	0.843763
ENSG00000095637	Q9BX66	SORBS1	6	-0.305297	-0.113809	-0.42901	0.0950677	-0.37515	-0.299925	0.0936815	-0.369949	0.294132	-0.381404	0.435757	-0.0219559	0.134228	-0.308318	0.535897	-0.115549	0.477761	-0.0813323	0.300794	-0.103892	0.232453	0.0569615	0.359708	-0.110849
ENSG00000096063	Q96SB4	SRPK1	4	0.589572	0.385181	0.221877	0.228695	0.000647119	0.0941444	0.175131	-0.133024	-0.0692216	-0.00759027	-0.179928	0.0219292	0.00669027	-0.0153778	0.0886407	0.0299321	-0.530211	-0.0453207	-0.192391	-0.235381	0.0731951	-0.146785	-0.215109	-0.145296
ENSG00000096384	P08238	HSP90AB1	7	0.187575	0.577371	0.139255	0.0351125	-0.18969	0.137527	0.0560767	0.437883	0.0486923	0.367942	-0.123395	-0.000934334	0.0550258	0.385369	-0.178281	-0.0496023	-0.270532	-0.0527538	-0.291797	-0.288229	-0.324165	-0.114948	-0.314878	-0.228621
ENSG00000096717	Q96EB6	SIRT1	6	-0.183608	-0.47654	0.124379	-0.184265	-0.0517044	0.0687496	-0.249806	-0.146066	-0.239933	0.0802028	0.119129	0.157105	-0.190502	0.0158095	0.0683545	0.332412	0.231028	0.0545497	0.0486564	0.308801	-0.0814655	0.0735612	-0.046907	0.168058
ENSG00000096872	Q96LB3	IFT74	1	0.395771	0.360086	-0.166909	0.0243491	0.105139	0.113672	-0.513999	0.294824	-0.083069	-0.0831167	0.688865	0.118499	-0.195698	-0.122139	0.266699	-0.0382643	0.420826	-0.430722	-0.354551	-0.468051	0.428796	-0.273932	-0.282192	-0.204885
ENSG00000097021	O00154	ACOT7	9	0.00385142	-0.529053	0.196323	0.335194	0.337927	0.092775	0.13733	0.57193	0.281632	-0.171583	-0.141534	-0.448275	0.27545	0.282046	-0.660157	-0.124962	0.0572	-0.185727	-0.00719405	0.326801	-0.479579	-0.0939285	-0.384673	0.328207
ENSG00000097033	Q9Y371	SH3GLB1	1	-0.0170573	0.135915	0.0477693	-0.396322	0.0020279	-0.0112509	0.240737	0.222004	0.0985468	-0.211258	-0.0117794	-0.201921	-0.323787	-0.267221	0.448213	-0.0650308	0.209313	0.302904	-0.0385626	-0.118644	0.127096	0.148761	-0.16476	-0.155694
ENSG00000099194	O00767	SCD	4	-0.289992	0.387252	-0.222417	0.0928587	-0.125271	-0.183542	0.161426	0.161565	0.0861141	0.163363	-0.273247	0.261065	-0.0988804	-0.119765	0.2515	0.295054	0.00324283	0.452719	-0.0271408	-0.550721	0.101073	-0.0434387	-0.318226	-0.164591
ENSG00000099204	O14639	ABLIM1	8	0.210656	0.0959362	-0.0261755	-0.251598	0.00893343	-0.307433	-1.05034	0.304913	-0.487315	-0.0706391	0.92139	0.184244	0.0367345	-0.146689	-0.972171	0.277313	0.172788	0.200758	-0.497051	0.612618	0.507239	0.0968476	0.411862	-0.23282
ENSG00000099246	Q9NP72	RAB18	6	0.0650521	-0.272021	0.490557	-0.268193	0.641097	0.127052	0.183663	0.487396	0.15421	0.294563	-0.0461375	0.139587	0.16801	0.228367	0.109041	-0.344366	-0.0836242	-0.595423	-0.158822	-0.557604	0.0823436	-0.522547	-0.11462	-0.20758
ENSG00000099256	Q9NRG1	PRTFDC1	1	-0.736278	0.0922524	-0.0845266	-0.00425096	-0.355754	0.329354	-0.203652	0.101955	0.264177	0.612713	-0.105045	0.262507	-0.278435	0.433466	0.0529038	-0.0348109	-0.725963	-0.206865	0.386909	-0.287312	0.148758	-0.177056	0.444513	0.0704393
ENSG00000099284	Q9P0M6	MACROH2A2	7	0.099781	0.659941	-0.176411	0.0952044	0.136911	0.220134	-0.0280149	0.0130051	0.0670599	-0.137303	-0.0791561	-0.452852	-0.0686483	0.102775	-0.108508	-0.276594	-0.213903	-0.207663	-0.180999	0.238111	0.292784	-0.123824	-0.0224615	0.150633
ENSG00000099364	Q6PCT2	FBXL19	9	0.148395	0.0171495	0.397801	0.415667	0.405989	0.46312	-0.150218	0.0154602	-0.460949	0.0244136	0.0201333	-0.0974525	-0.269092	-0.020953	-0.596177	0.0562838	-0.169428	0.216924	-0.0841686	0.123774	-0.354957	0.0620731	-0.0951013	-0.0686884
ENSG00000099365	P61266	STX1B	9	-0.684595	-0.819861	0.471479	0.324063	0.228469	0.00781054	0.249805	0.688283	0.42414	0.37393	-0.445693	-0.272649	0.61966	0.284476	-0.0835525	-0.38532	-0.89356	0.123634	-0.0899208	-0.133842	-0.414551	0.266858	-0.246024	0.406961
ENSG00000099783	P52272	HNRNPM	1	0.623126	0.265157	0.0327082	0.433801	-0.505728	-0.286814	0.738051	0.0799687	0.428498	0.0292407	-0.55285	-0.434934	0.646651	0.264684	0.125843	-0.266144	-0.448325	-0.451711	0.24127	-0.121954	0.211159	-0.213509	-0.378685	-0.459501
ENSG00000099795	P17568	NDUFB7	7	0.06985	0.18249	0.498787	-0.242191	0.0917179	0.314439	0.0288602	0.128396	0.173207	0.349894	-0.375195	0.0192179	-0.239144	0.329	-0.135593	-0.00458484	-0.386113	-0.132105	-0.0182026	-0.105705	-0.385228	-0.0464516	-0.119147	0.00379974
ENSG00000099797	Q9NZ01	TECR	4	0.255026	0.290454	0.25077	0.465776	-0.211301	0.0886558	0.45907	0.42376	0.137977	0.248438	-0.420704	-0.180656	0.463639	0.675235	-0.141441	-0.325512	-0.517101	-0.250361	0.0109233	-0.423346	-0.145852	-0.413877	-0.319783	-0.41979
ENSG00000099810	Q13126	MTAP	2	-0.155804	0.223997	-0.00312895	-0.0189425	-0.386461	0.0592	-0.00677224	-0.27938	0.0397347	0.192906	0.250135	0.502059	0.296861	-0.822428	-0.251736	0.138995	0.252109	0.0622814	-0.00673415	0.112191	0.0483981	-0.28543	-0.118314	0.156262
ENSG00000099814	Q9Y4F5	CEP170B	9	-0.223845	-0.0183504	-0.325702	-0.350244	0.198157	0.351223	-0.197554	-0.0225199	0.124823	0.226081	-0.437254	0.0057001	-0.205303	-0.166827	0.267527	0.445581	-0.10474	0.632762	-0.303856	0.281935	-0.339534	0.150306	-0.2522	0.263832
ENSG00000099864	O75781	PALM	8	-0.564047	-0.103423	0.00264759	-0.414124	0.0181058	0.294982	-0.225254	0.51714	-0.0906801	0.445215	-0.146894	0.246116	-0.306667	0.281762	-0.265476	0.320294	-0.309712	0.388152	-0.332827	0.25261	-0.400489	0.145934	-0.0753405	0.321976
ENSG00000099889	O00192	ARVCF	2	-0.0400588	0.104154	-0.252812	-0.129381	-0.0173231	0.278579	0.00907555	-0.201395	-0.0097061	0.076891	-0.0789424	-0.144668	-0.180131	-0.0298682	-0.095478	0.283644	-0.0819664	0.401493	-0.215513	0.244451	-0.218735	0.188625	-0.0526702	0.161734
ENSG00000099901	P43487	RANBP1	1	0.575838	0.534942	0.215791	0.45555	-0.124078	0.0441497	0.32436	0.145361	0.402883	-0.0238246	-0.487036	-0.254705	0.515824	0.388008	0.000483408	-0.307936	-0.401163	-0.505938	0.0832377	-0.262759	0.359628	-0.408943	-0.854825	-0.414849
ENSG00000099940	O95721	SNAP29	8	-0.246932	-0.585186	-0.211078	-0.0913816	0.0560325	-0.172664	-0.0336914	0.00841795	0.0436826	-0.0636622	0.0784368	0.0204576	0.133055	0.195272	0.0521448	-0.145051	0.139799	0.0223514	-0.156053	0.10008	0.204159	0.131318	0.186877	0.333616
ENSG00000099942	P46109	CRKL	2	0.119417	0.228602	-0.340566	0.119544	-0.232706	-0.0865446	0.384833	-0.432712	0.128459	-0.517512	-0.0128032	-0.13414	0.308096	-0.260114	0.0853023	0.153916	0.118935	-0.0832114	0.131366	0.0909084	0.11778	0.0736416	0.019442	0.0200666
ENSG00000100029	O00541	PES1	5	0.0859359	-0.0622402	0.133653	0.42598	-0.329726	-0.40653	0.0684958	0.277502	-0.0345004	-0.0652843	-0.238124	-0.00290601	0.203649	0.163144	-0.230816	-0.172427	0.0184849	0.166898	-0.00482149	-0.0817715	0.0572535	-0.361653	0.175818	0.213986
ENSG00000100030	P28482	MAPK1	1	-0.129137	-0.0828864	0.223441	0.0586612	0.0707473	0.0253425	0.0672581	0.0187481	0.261412	0.0376465	0.302896	-0.283375	0.0797451	0.0134684	0.327671	-0.39366	0.170973	-0.0925301	0.0736915	-0.279277	0.0747785	-0.309495	-0.0576219	-0.178497
ENSG00000100075	P53007	SLC25A1	7	0.278333	0.828333	-0.29545	0.441428	-0.223833	-0.093984	0.273031	0.300874	0.474149	-0.0025878	-0.0333977	-0.0659771	0.765419	0.110013	-0.112568	-0.12908	-0.167159	-0.441476	-0.393425	-0.551044	-0.0440945	-0.255741	-0.305324	-0.356439
ENSG00000100083	Q9UJY5	GGA1	6	-0.106695	-0.318743	-0.0138238	-0.296104	-0.0500246	0.163645	0.00517276	0.0406217	-0.304889	0.300345	-0.250481	0.124816	-0.16374	0.134577	0.0898189	0.225265	0.0660618	-0.19805	-0.0652051	0.2544	0.010927	0.228566	-0.0256164	0.149156
ENSG00000100095	Q9BYH1	SEZ6L	8	-0.773123	-0.206234	-0.0334494	-0.0107239	0.0616274	0.277294	-0.433733	0.252515	0.281978	0.628273	-0.0402182	0.0944859	-0.41738	0.243156	-0.180181	0.098015	-0.0218129	-0.0919322	0.0471838	0.141991	-0.240355	0.0391498	0.0424718	0.241002
ENSG00000100116	O75600	GCAT	3	0.221007	0.343433	0.464146	0.66846	-0.0484135	0.236912	0.108759	0.0896945	-0.272208	0.224159	0.340856	-0.273245	0.0796192	-0.338204	0.33996	-0.727208	0.0462325	-0.128251	-0.510058	0.086387	-0.214006	0.133614	-0.0664176	-0.805229
ENSG00000100167	Q9UH03	SEPTIN3	9	0.0708743	0.267173	-0.0619063	-0.339668	0.456868	0.174744	-0.417847	-0.0437333	-0.335732	-0.0430417	0.0796036	0.254674	-0.370657	-0.224696	-0.0719858	0.0188467	0.141493	0.0191094	-0.206759	0.116757	0.169204	0.219046	0.0132217	0.114411
ENSG00000100201	Q92841	DDX17	4	-0.0603916	0.0451395	-0.197822	-0.138141	0.110311	-0.0140968	-0.101391	-0.00817485	-0.098149	-0.0181634	0.21492	0.0205323	0.0342218	-0.128137	0.114953	0.0177784	0.202064	-0.182355	0.108736	-0.0881181	0.157658	0.141411	0.0442669	-0.177051
ENSG00000100207	Q9UGU0	TCF20	9	0.260226	0.310193	-0.00106681	-0.254445	0.0899916	-0.0474761	-0.307925	-0.0554985	-0.0972324	-0.0622496	0.146442	0.347354	-0.252651	0.0586896	-0.407686	0.114159	-0.0612501	0.162653	-0.324008	0.337444	-0.0846392	0.255398	-0.394686	0.268265
ENSG00000100220	Q9Y3I0	RTCB	3	0.334466	0.125926	-0.399199	0.185757	-0.332944	-0.210548	0.486299	-0.154125	0.348586	-0.257123	0.187123	-0.424647	0.428614	-0.314192	0.10381	-0.180212	0.191728	-0.197515	0.191612	-0.125223	0.142031	-0.196303	0.100461	-0.0343826
ENSG00000100225	Q9Y3I1	FBXO7	1	-0.137094	0.0968076	-0.0990823	-0.0169615	-0.0422395	-0.0359713	0.0385498	-0.154895	0.222824	0.0963157	0.166563	-0.113782	-0.0957356	0.0513856	-0.00868024	-0.0480383	0.16041	-0.116915	0.0511816	-0.0223954	0.0102287	-0.178875	0.141341	0.0350584
ENSG00000100227	Q9BY77	POLDIP3	2	0.0045532	-0.0851167	0.0962486	-0.133848	-0.037325	-0.29631	0.119352	-0.159235	0.06981	-0.07393	-0.0183377	-0.0125321	0.0715372	-0.0320465	-0.0501937	0.124894	-0.025511	0.113536	0.102968	0.0310403	0.0463302	0.155803	0.00195295	-0.0136391
ENSG00000100242	Q9UH99	SUN2	8	-0.596262	-0.139649	0.197533	-0.703535	0.619853	0.208074	-0.230413	0.662574	-0.317436	0.242853	0.0561719	-0.0238302	-0.389913	0.241504	-0.228037	-0.112911	0.00389437	0.03765	-0.140101	0.353792	-0.092207	0.103287	0.0476365	0.199472
ENSG00000100243	P00387	CYB5R3	7	-0.0218252	-0.0791813	0.128171	0.16442	-0.00670187	-0.0517671	0.322083	0.550298	0.363531	0.583271	-0.286961	-0.256931	0.329667	0.79799	0.0517761	-0.161588	-0.347526	-0.299773	0.0423688	-0.413673	-0.142651	-0.591127	-0.108398	-0.565473
ENSG00000100258	Q9BU23	LMF2	5	0.142334	0.2369	-0.449321	0.269218	-0.206394	-0.305366	0.169839	-0.17092	0.23735	-0.291881	0.313054	0.00974856	0.164542	-0.310158	0.157343	-0.0963602	0.0913933	0.151499	-0.153342	-0.336547	0.113431	-0.0141758	0.252631	0.0251809
ENSG00000100266	Q9UNF0	PACSIN2	1	0.310006	0.181278	0.0206224	0.477191	0.0712899	-0.126838	0.06699	-0.0933818	0.182138	0.130292	-0.155804	-0.44651	0.0209705	0.112567	0.195362	-0.130505	-0.0768127	-0.0342631	0.0999594	-0.31335	-0.00952249	-0.28689	-0.15274	-0.0420496
ENSG00000100297	P33992	MCM5	1	0.297	0.312597	-0.0043609	0.410739	0.51053	-0.714659	-0.24803	-0.230526	-0.401759	-0.517806	0.244863	0.215919	0.0197272	0.687642	0.216352	0.200943	0.192515	-0.448213	-0.245632	-0.102329	0.0440502	-0.374238	-0.135214	0.0698896
ENSG00000100300	P30536	TSPO	6	-0.231905	-0.234323	-0.258588	0.20937	-0.149622	-0.592972	-0.495344	0.359048	-0.016042	0.463902	-0.209746	0.627108	-0.210581	0.298443	-0.105412	0.327407	-0.29557	-0.042465	-0.188528	0.644907	-0.218646	0.269737	-0.139543	0.189366
ENSG00000100304	Q14166	TTLL12	9	-0.0397001	-0.0325373	-0.163509	0.11518	-0.408479	-0.200065	0.272561	0.25399	0.134012	0.281064	0.0126944	0.0862426	0.025084	0.180136	-0.138354	0.025204	-0.047832	0.125034	0.357457	0.0431505	-0.559348	-0.0629074	-0.364624	0.105548
ENSG00000100314	Q86V35	CABP7	4	0.37771	0.494964	0.240656	0.0264283	0.326412	0.188446	-0.266408	-0.226613	-0.475054	-0.311876	-0.374528	0.414256	-0.47261	-0.221689	-0.712262	1.27364	-0.0170289	0.490905	-1.07833	1.32059	-0.869278	0.0630747	-0.390744	0.199347
ENSG00000100321	O43759	SYNGR1	9	-0.744346	0.4141	-0.0085342	0.485607	0.039699	0.274468	-0.468085	0.354054	0.118207	-0.147377	0.383053	0.552465	-0.24573	-0.0455699	-0.738343	-0.131014	-0.0852577	-0.028381	-0.203741	0.720919	-0.0404904	-0.291979	-0.244852	0.0811314
ENSG00000100345	P35579	MYH9	2	0.141015	-0.0109553	-0.441786	0.36044	-0.113699	-0.2965	0.28922	0.0993925	-0.22911	-0.20473	0.331231	-0.0592498	0.244529	-0.193435	-0.112876	-0.469012	0.205998	-0.253457	0.225391	0.258529	0.563598	-0.380571	0.293776	-0.247739
ENSG00000100354	Q9UPQ9	TNRC6B	5	-0.0152259	0.295246	0.429044	0.253281	0.555437	-0.13044	-0.402958	-0.506968	-0.463467	-0.263689	0.040088	0.266609	-0.0636958	0.0345098	-0.219411	-0.162484	-0.225105	-0.486179	0.33486	0.158011	0.219316	0.412418	-0.165598	0.106401
ENSG00000100359	Q96HU1	SGSM3	8	-0.0502302	0.0101475	0.00292741	0.133334	0.454972	0.0932241	-0.211746	0.185721	0.0636054	0.405484	-0.250882	-0.00133964	-0.111724	0.236736	-0.315212	0.0478895	0.0248888	-0.00624199	-0.292826	-0.261157	-0.385277	0.021607	0.240526	-0.0344267
ENSG00000100364	Q6ICG6	KIAA0930	9	-0.496516	-0.356072	-0.0678138	-0.15916	-0.369132	-0.391626	0.221276	0.241193	0.00516797	0.361218	0.103431	0.204312	0.138304	0.220049	0.185449	0.120268	-0.146124	-0.0779851	-0.169074	0.449482	-0.295903	0.393724	-0.0543018	-0.0601667
ENSG00000100403	Q9UGR2	ZC3H7B	7	-0.0171594	-0.115911	0.246597	0.149346	0.059408	0.242086	0.0706394	0.34006	0.00171268	0.456359	-0.29586	-0.134512	-0.0247145	0.663494	-0.275095	0.116127	-0.242744	0.266911	-0.179974	-0.085887	-0.514073	-0.25808	-0.371747	-0.0969815
ENSG00000100412	Q99798	ACO2	9	-0.205286	-0.248804	0.329734	-0.219875	0.225158	0.0183146	0.0782601	0.16472	0.0149099	0.140186	0.119463	-0.144322	-0.0111787	0.334383	-0.0322106	-0.150948	0.223409	-0.324836	0.0171939	-0.338303	0.094129	-0.0895939	0.298756	-0.293259
ENSG00000100418	Q6ICB0	DESI1	7	-0.177214	-0.0737976	-0.00128786	0.086404	0.373588	0.0420569	0.419316	0.472285	0.10946	0.367812	-0.494843	-0.0121881	0.0424238	0.169919	0.188682	0.206359	-0.0322701	0.173919	-0.341905	-0.252905	-0.264901	-0.218466	-0.392448	-0.389999
ENSG00000100479	P56282	POLE2	1	0.218054	0.285769	-0.374717	-0.171686	0.1925	-0.042046	0.115975	0.67334	-0.00503028	-0.00977147	-0.247587	-0.0436982	-0.364127	0.769281	0.430056	0.0149427	0.338346	-0.524716	-0.124627	-0.597047	0.218341	-0.685896	-0.209924	0.144267
ENSG00000100505	Q9C026	TRIM9	2	-0.321136	-0.115975	-0.476174	-0.181186	-0.169112	-0.0449537	0.0340965	-0.198176	0.209667	0.329532	-0.123332	-0.309251	0.35968	-0.0340721	0.252862	0.219342	0.139948	0.318324	0.411608	-0.127812	0.0998145	-0.157535	-0.0138854	-0.102272
ENSG00000100519	P62333	PSMC6	6	0.142564	-0.0737897	-0.118982	0.0663438	0.00117298	-0.0815639	0.145987	-0.10539	0.00152993	-0.0196962	-0.0655137	-0.0773468	0.138079	-0.00467615	0.0118047	-0.00817367	0.0637349	0.137197	-0.0154733	-0.0692056	-0.0451251	-0.0126781	-0.0533037	0.0425044
ENSG00000100554	Q9Y5K8	ATP6V1D	9	-0.33506	-0.309172	0.403827	-0.13296	0.175714	0.155115	-0.00763514	0.784182	0.0362092	0.516071	-0.138236	0.0805303	-0.158168	0.638687	-0.23156	0.27761	-0.144068	0.376114	-0.686576	-0.258646	-0.35623	-0.0306805	-0.596392	-0.0586728
ENSG00000100580	Q6PL24	TMED8	9	-0.0897869	-0.0996407	-0.252993	-0.0447389	0.177579	0.022957	-0.283576	0.0152415	0.0648988	-0.00643732	0.0427086	0.0744433	-0.39368	-0.00991947	0.0681409	0.0850212	-0.118966	0.120005	0.142139	0.0140811	0.289288	0.157909	-0.105801	0.131127
ENSG00000100592	Q9Y4D1	DAAM1	4	-0.115206	0.392832	0.23571	-0.0470738	0.0157926	0.0717212	0.102891	0.0992812	0.0411668	-0.00656838	-0.241554	0.0522102	0.00524691	0.260167	-0.220596	0.00666419	-0.183172	-0.0938971	0.034239	-0.101284	0.0193802	-0.34979	-0.104623	0.126462
ENSG00000100605	Q13572	ITPK1	7	-0.284518	-0.480791	-0.587768	0.342368	0.0921227	-0.0698305	0.223643	0.280625	-0.261952	0.618737	0.0487748	0.0010847	-0.270695	0.315149	0.0658411	-0.113602	-0.245028	0.354499	0.658556	0.303122	-0.314142	-0.151656	-0.22419	-0.300351
ENSG00000100650	Q13243	SRSF5	3	0.151624	0.0630708	-0.171715	-0.145176	0.100612	-0.0349919	0.0749824	-0.29595	0.0162191	0.00103307	0.00734602	0.056021	-0.170235	-0.292159	0.107896	0.0199521	0.022016	-0.0112774	0.0253183	-0.0998374	0.126425	0.126814	0.151834	0.170179
ENSG00000100697	Q9UPY3	DICER1	9	0.300655	-0.0573563	0.926721	0.117142	0.486018	0.418893	-0.168535	-0.140721	-0.222348	-0.0546127	-0.137819	-0.037971	-0.296431	-0.0148005	-0.103087	0.218246	-0.188828	-0.0173691	-0.276363	-0.0125931	-0.197434	-0.0742492	-0.175647	-0.291509
ENSG00000100714	P11586	MTHFD1	1	0.418285	0.847395	-0.636464	0.611343	-0.963206	-0.458116	0.0354927	-0.422582	0.0550946	-0.74174	0.348237	-0.185065	0.339584	-0.582566	0.177614	-0.200926	-0.0169024	-0.230651	0.410245	0.192424	0.197697	0.498668	0.10804	0.198099
ENSG00000100722	Q6PJT7	ZC3H14	1	0.0901783	0.0412608	-0.722234	0.365003	-0.180712	-0.680433	0.0819386	-0.141989	0.206925	-0.0811017	0.273642	-0.0970283	0.156877	0.187991	0.150467	0.20102	0.17805	0.0614593	-0.344407	0.0285942	-0.06125	-0.167522	0.29925	0.15402
ENSG00000100726	Q9Y4R8	TELO2	5	0.115865	0.149407	0.0345637	0.110064	0.0662519	-0.0850999	0.296785	-0.307556	0.0022976	0.0319607	0.253396	-0.212642	0.378177	-0.264113	-0.015978	-0.223693	0.1279	-0.215734	-0.0177122	-0.226319	0.0566514	0.0117992	0.124625	-0.190898
ENSG00000100749	Q99986	VRK1	3	0.0780655	0.250705	0.207788	0.0928046	-0.147686	0.178435	0.0814221	-0.000585982	-0.0396424	-0.198891	-0.112383	-0.227805	0.0683346	-0.108314	0.177439	0.331764	-0.0493581	-0.320246	-0.13058	-0.0129114	0.210793	0.168017	-0.261096	-0.23607
ENSG00000100784	O75582	RPS6KA5	6	-0.414618	-0.778746	0.00554278	-0.431331	0.0112495	-0.0338028	-0.189374	0.172628	-0.214247	0.330012	0.372345	0.209204	-0.145853	0.113288	-0.265519	0.162414	0.164438	-0.0230746	0.264603	0.069072	0.107607	0.223122	0.204664	0.0863754
ENSG00000100796	Q6IN85	PPP4R3A	3	0.00347109	0.0804312	-0.227484	-0.11837	-0.168823	-0.15039	0.08198	0.0657775	0.0198156	0.193655	0.150601	0.17506	0.0032115	-0.0334703	-0.175001	0.0884986	0.0956497	0.0217096	-0.187753	-0.165132	-0.0979141	0.0632921	0.249423	0.0317599
ENSG00000100823	P27695	APEX1	6	0.185641	0.255556	-0.469056	0.403936	-0.478371	-0.211736	-0.00615549	0.0679315	-0.0603916	-0.127304	0.0941978	0.124303	0.377494	-0.133621	0.00111321	-0.376577	0.105553	0.103128	0.0106291	-0.200488	-0.00860695	-0.12239	0.469483	-0.00426843
ENSG00000100842	O43281	EFS	1	-0.333245	-0.112169	-1.19674	-0.182816	-0.348151	-0.704153	0.109178	0.00590427	0.0305159	-0.0277319	0.0403968	-0.193531	0.0885416	-0.174146	-0.315576	0.341197	0.537405	0.288	-0.167568	0.713009	-0.186155	0.57074	0.747278	0.469816
ENSG00000100890	O15091	PRORP	3	0.234442	-0.198081	0.365557	0.0558465	0.247281	0.150526	0.489089	0.507246	0.0089163	0.364705	0.230076	-0.272626	0.299137	-0.0732319	0.152732	-0.336733	-0.209287	-0.253019	-0.0933421	-0.731294	0.00444483	-0.193502	-0.176926	-0.571958
ENSG00000100911	Q9UL46	PSME2	2	0.0940484	0.208623	-0.0940492	0.0134096	-0.126642	-0.260747	-0.0229934	0.0562826	0.172116	0.0636669	-0.0294598	-0.232534	0.0956696	-0.382229	0.24585	0.0221215	0.0485068	-0.00208991	-0.124759	-0.209923	-0.0214132	0.229632	0.217431	0.0394816
ENSG00000100938	Q9P2T1	GMPR2	4	-0.191777	0.103271	0.0655016	0.0585402	-0.0809346	0.181008	0.152804	0.217138	0.0501695	0.635864	0.460786	0.0413487	0.0338939	0.158014	0.316944	-0.362884	0.0331119	-0.017877	-0.274878	-0.515719	-0.390614	-0.291214	-0.295788	-0.0867092
ENSG00000100941	Q9H307	PNN	1	0.299331	-0.151518	-0.317257	0.0693988	-0.196868	-0.338185	0.417971	-0.246455	0.0414592	-0.325875	0.0387414	-0.170786	0.266724	-0.281992	0.308966	0.0116515	0.104476	-0.193318	0.247022	-0.0243417	0.31811	-0.0209327	0.189023	-0.0453448
ENSG00000100949	Q92696	RABGGTA	9	-0.596346	-0.583165	0.814944	-0.579724	0.557493	0.20391	-0.23095	0.310979	-0.208955	0.09744	-0.30654	0.146519	-0.259423	0.209385	-0.228627	0.523358	0.180028	0.0269543	-0.308671	0.132333	-0.248851	0.215936	-0.195283	0.327257
ENSG00000100983	P48637	GSS	7	0.159124	0.178135	-0.201501	0.176055	0.0632372	-0.259592	-0.178303	-0.102305	-0.0299726	0.0753094	-0.307011	0.312803	-0.223097	0.112449	0.325571	0.130476	-0.342295	0.0214689	0.22096	-0.0413124	0.198377	0.205415	-0.511906	0.0179124
ENSG00000100994	P11216	PYGB	6	0.0831466	-0.01706	-0.0622138	-0.0652719	-0.0104747	0.00859535	0.415937	0.235685	0.146218	0.210449	-0.134057	-0.405935	0.0852908	0.180148	0.00503102	-0.141496	0.0433624	-0.251665	0.209814	-0.25308	0.108137	-0.233473	0.0559245	-0.213012
ENSG00000101003	Q14691	GINS1	1	-0.113744	0.0561027	0.101828	0.141676	0.399806	-0.561797	0.0219386	-0.151178	0.287569	0.372729	0.226954	-0.18197	-0.30349	0.212475	0.196002	-1.20756	0.195599	-0.248705	0.176803	-0.185357	0.504994	-0.373025	0.342008	0.0903397
ENSG00000101150	O43399	TPD52L2	5	0.0543954	0.150018	-0.235646	-0.0948374	0.0397118	-0.103794	0.0453852	-0.370207	-0.115619	0.00522583	-0.00038117	-0.019258	0.0423518	-0.21178	0.0984097	0.13399	0.0531644	0.263181	-0.237008	0.144979	-0.189744	0.142188	0.145666	0.259609
ENSG00000101152	Q9H3Z4	DNAJC5	9	-0.678915	-0.84583	0.664775	-0.0134691	0.563083	0.613354	-0.408693	0.802549	-0.26454	0.526496	-0.378669	0.154358	-0.422103	0.643975	-0.411014	0.0697676	-0.396973	0.0882908	-0.192831	0.370566	-0.72544	0.159386	-0.196357	0.278235
ENSG00000101161	O94906	PRPF6	8	-0.1675	-0.215114	0.0817604	0.290652	0.353266	0.165822	-0.213921	0.373421	-0.217351	0.0540933	-0.132696	0.0414036	-0.0372764	0.193166	-0.318548	-0.274483	-0.147719	0.0388039	-0.0843082	0.174577	-0.286716	0.169549	0.0924235	0.0666935
ENSG00000101191	Q9BTC0	DIDO1	6	0.0941987	0.209662	0.0583252	-0.0400181	-0.0614947	-0.24424	-0.223142	-0.23902	-0.0290642	-0.139314	0.152072	0.123374	0.0260356	-0.371673	0.00364937	-0.0213859	-0.141874	-0.210696	0.306209	0.267436	0.124041	0.229129	0.0585564	0.0692317
ENSG00000101210	Q05639	EEF1A2	9	-0.587377	-0.288397	0.366899	0.688869	0.32909	0.380902	0.140478	0.336875	-0.131635	0.0325473	-0.107001	-0.288481	-0.332541	0.371235	-0.00272097	-0.390635	-0.0154189	0.242264	-0.0998047	0.334154	-0.426069	-0.331675	-0.303429	0.0818716
ENSG00000101247	Q5TEU4	NDUFAF5	9	0.319608	0.605148	0.727377	-0.551164	0.224343	0.190925	0.317431	0.0416037	-0.1292	0.301658	-0.947329	0.0926722	-0.186924	0.461992	-0.188589	0.0915601	0.131874	-0.0349695	-0.882163	-0.0767007	-0.271815	0.242151	-0.405757	-0.0737314
ENSG00000101265	P50749	RASSF2	2	-0.525233	-0.555624	-0.305718	-0.332113	-0.467096	-0.684386	0.163225	-0.401153	0.311181	0.374065	0.0883716	-0.078952	0.203939	-0.305817	0.244675	0.191079	0.0970818	0.249667	0.649124	0.0787209	0.440485	0.239645	0.154952	0.169881
ENSG00000101290	O95674	CDS2	7	-0.443242	-0.208309	0.651771	-0.272683	0.733519	0.571703	-0.0870522	0.732125	-0.124877	0.84243	-0.280775	0.20871	-0.31205	0.686856	-0.464476	-0.0948117	-0.334355	0.111438	-0.673065	-0.171533	-0.545452	-0.116584	-0.371711	-0.0375743
ENSG00000101310	Q15437	SEC23B	6	-0.0747525	-0.0764188	-0.0189043	-0.0934926	0.144021	0.0581808	0.167193	-0.0551759	0.113096	-0.313913	0.129287	-0.0232284	0.157034	-0.183076	0.342796	0.0675527	0.124718	0.0167503	-0.0925638	-0.130019	0.0463535	-0.379406	0.239439	-0.165471
ENSG00000101347	Q9Y3Z3	SAMHD1	7	0.0854988	-0.0939472	0.464971	0.0557201	-0.205193	0.080751	0.0582411	0.557642	0.1734	0.752452	-0.136802	0.0243189	0.243964	0.347588	0.0394665	-0.350113	-0.614356	0.00645869	-0.755842	-0.328321	-0.0956268	0.657537	-0.18187	-0.785937
ENSG00000101349	Q9P286	PAK5	8	0.339845	-0.184762	0.428642	0.112992	0.221098	0.447518	0.105521	0.0992015	0.167817	0.226556	0.172865	0.0415489	-0.397209	0.148611	-0.242886	-0.269235	-0.0834318	-0.00272483	-0.379637	-0.353817	-0.275785	-0.228865	-0.0374175	-0.0564454
ENSG00000101350	O15066	KIF3B	9	-0.661247	-0.840964	0.770021	-0.388896	0.00722235	0.186612	-0.475933	0.765458	-0.57146	0.109081	-0.406255	0.403835	-0.566032	1.45133	-0.828502	-0.0443769	-0.702228	0.105948	0.552538	0.0837655	0.0961023	0.228448	0.67095	0.0545812
ENSG00000101365	O43837	IDH3B	6	-0.0497255	-0.230826	0.0188757	-0.289278	0.173987	0.0982	0.192522	0.0548168	0.0105677	-0.0105077	-0.206006	-0.264951	0.273165	0.208853	-0.257782	-0.0555136	-0.037275	-0.0302829	0.0501981	0.0388615	0.138281	0.111888	0.095886	-0.033955
ENSG00000101367	Q15691	MAPRE1	9	-0.0164548	-0.212441	0.222334	-0.0957804	-0.0643096	-0.0685507	-0.0153123	0.253529	0.0565513	0.0783134	-0.240143	-0.0797108	-0.0550591	0.315851	-0.0789898	-0.00227234	-0.152039	-0.0933407	0.00382349	0.0537202	0.0325006	0.185724	-0.0467723	0.018829
ENSG00000101421	Q9H444	CHMP4B	3	-0.0271578	0.0757458	-0.0671092	-0.0517189	-0.155259	-0.179149	0.599581	0.318317	0.414207	0.254822	-0.163335	-0.127198	0.255053	0.309319	0.475374	-0.0306498	-0.0916162	-0.0676548	-0.284633	-0.306724	-0.209919	-0.346919	-0.446944	-0.146432
ENSG00000101439	P01034	CST3	2	-0.282963	0.0185594	-0.233338	-0.19899	-0.404767	0.0484579	0.118641	-0.235656	-0.162558	-0.0735764	-0.493541	0.363057	-0.212568	-0.398827	0.124623	0.323343	-0.0169778	-0.162562	0.842372	0.332251	0.350726	-0.0978409	0.153622	0.298512
ENSG00000101444	P23526	AHCY	1	0.593955	0.642837	-0.0215242	0.76875	-0.607757	-0.465385	0.868125	0.38345	0.523006	0.172517	0.0103279	-0.293261	0.476922	0.15267	0.0770934	-0.71068	0.0600628	-0.146277	-0.350456	-0.449391	-0.346265	-0.723588	-0.0661125	-0.549018
ENSG00000101460	Q9H492	MAP1LC3A	9	-1.31088	-1.26036	0.683357	-1.27047	0.676447	0.820047	-0.769139	0.980299	-0.590667	1.19258	-0.264747	0.771079	-1.12704	0.847646	-0.556377	1.01462	-0.221316	0.799838	-0.995578	0.509739	-0.706592	0.805623	-0.442338	0.414251
ENSG00000101474	Q9HDC9	APMAP	7	0.0609744	-0.0662563	-0.0122996	-0.0315937	0.165801	-0.251252	0.3103	0.232396	0.0544933	0.362522	-0.541166	-0.143616	0.0666202	0.154679	-0.227779	0.193562	-0.257901	0.129213	-0.0335061	-0.106443	-0.0697811	-0.0180125	-0.117226	0.146271
ENSG00000101489	Q9BZC1	CELF4	7	-0.43234	-0.267869	-0.399385	-0.334916	-0.142693	0.0262075	-0.318491	-0.0333137	-0.223293	0.449976	0.105551	0.373046	-0.271267	0.254408	-0.200098	0.453049	0.0049352	0.618665	-0.358521	0.250785	-0.326874	0.49732	-0.184853	0.459971
ENSG00000101493	Q92618	ZNF516	1	0.0254129	0.125088	-0.458366	-0.194562	-0.22253	-0.191283	0.486544	-0.393172	0.390133	0.146094	-0.0451538	-0.332989	0.166312	-0.277676	0.312446	0.410731	-0.0814985	0.0284685	0.00852884	0.289637	-0.280585	0.0765599	0.0321806	-0.0203206
ENSG00000101544	Q6IQ32	ADNP2	4	0.357106	0.0875317	-0.0665358	0.235626	0.0629175	-0.0486919	0.239326	-0.110865	0.271428	-0.094772	0.0517332	0.00206356	-0.0227631	-0.335919	-0.000725626	-0.0102497	-0.017286	-0.131753	-0.140415	0.0450693	-0.215245	-0.306781	0.102615	0.0465859
ENSG00000101558	Q9P0L0	VAPA	7	-0.159234	-0.23338	0.301577	-0.0646461	0.1757	0.149145	-0.184512	0.10287	-0.0697421	0.196066	0.26928	0.0681701	0.0626727	0.333528	0.0142272	-0.0312864	0.0638117	0.0888695	-0.0379138	-0.278149	-0.346099	-0.286561	-0.0505463	-0.083847
ENSG00000101577	Q92539	LPIN2	9	-0.312845	-0.545929	0.0706387	-0.263914	-0.0909635	-0.00792983	-0.41981	0.582602	-0.208282	0.533746	0.0791049	0.155629	-0.517731	0.53146	0.150378	0.0187793	0.040142	0.268016	0.116065	-0.168373	0.122011	-0.266829	0.127254	0.00677845
ENSG00000101596	A6NHR9	SMCHD1	1	0.142159	0.00440124	0.0980208	0.072746	0.131159	0.0403462	-0.0384428	0.102335	-0.047605	0.0806346	0.0379078	0.0833076	-0.0294533	0.0547247	-0.070409	-0.0606729	-0.00702736	-0.00536569	-0.112172	-0.294786	0.0250621	0.0813757	-0.23236	-0.0558862
ENSG00000101639	Q8TEP8	CEP192	1	0.174821	0.248352	-0.153238	0.220638	0.0131262	-0.212904	-0.136587	-0.299927	0.321135	-0.0386735	-0.0655654	0.156333	0.0430932	0.00867444	-0.126948	-0.171067	0.173034	0.077249	-0.215546	0.19815	-0.0234508	-0.263899	-0.0963153	0.169515
ENSG00000101680	P25391	LAMA1	1	-0.313325	0.132188	-0.384379	0.0170632	0.194389	-0.465598	-0.221003	-0.373584	0.028349	-1.03376	0.348796	-0.1783	-0.145714	0.533629	-0.115366	-0.567894	0.630233	0.830094	0.123723	0.289484	-0.0298251	0.0865896	0.380605	0.233601
ENSG00000101746	O94818	NOL4	9	-0.446583	-0.766447	0.67809	-0.267169	0.557952	0.512105	-0.93532	0.516251	0.896585	1.09766	0.160353	-0.302299	0.497431	0.24075	-0.35457	0.56242	-0.270405	0.370079	-0.764365	-0.324481	-1.17762	-0.343527	0.0866601	-0.223547
ENSG00000101752	Q86YT6	MIB1	3	0.186595	0.291818	0.171698	0.31089	0.234031	0.314683	0.197644	0.0223192	0.43949	0.218198	0.169518	-0.125789	0.327893	0.129885	-0.092177	-0.421491	-0.040756	-0.359761	-0.112167	-0.53468	-0.210049	-0.544107	-0.176351	-0.397335
ENSG00000101849	O60907	TBL1X	1	0.316994	-0.151125	-0.351563	0.180983	-0.395528	-0.411016	0.257684	0.101038	0.206833	0.11985	0.04001	0.135988	0.303879	-0.268295	-0.241227	-0.597702	-0.156621	-0.232298	0.376658	0.0110461	0.0486348	0.284022	0.146101	0.275654
ENSG00000101856	O00264	PGRMC1	4	0.101978	0.462765	0.00124233	0.412703	0.210068	0.0927507	0.0546003	0.091119	0.184546	-0.0433377	-0.376539	-0.151975	0.659073	-0.203929	-0.0240784	-0.0433341	-0.412456	0.151959	-0.0990824	-0.105727	-0.0798688	-0.266421	-0.553428	-0.0626289
ENSG00000101868	P09884	POLA1	1	0.133448	-0.392098	-0.0230164	0.244007	-0.0848567	-0.245509	0.397997	0.607851	0.185323	-0.457156	0.0767911	-0.263501	0.309269	0.167668	0.0845969	0.300524	-0.273269	-0.545525	0.0380493	0.139439	-0.106158	0.178854	-0.255017	-0.217711
ENSG00000101871	O15344	MID1	3	-0.054948	-0.0209833	-0.142959	-0.328663	-0.344001	0.112339	0.21995	0.121913	0.255408	0.257339	-0.0814922	-0.0142672	0.0273309	-0.0159465	0.21635	0.243664	0.0372349	0.219116	-0.130427	-0.294366	-0.146405	-0.0324717	-0.179498	0.0757826
ENSG00000101882	Q8N5F7	NKAP	4	0.122392	0.0497268	0.0398944	-0.169298	0.335768	0.0793706	0.117044	-0.0658152	-0.105892	0.0678429	-0.0566391	0.00652714	0.0843702	0.100094	-0.158176	0.0263199	0.206573	-0.0261429	-0.17369	-0.0113744	-0.333173	0.0349296	-0.14127	-0.0293824
ENSG00000101911	P11908	PRPS2	1	0.147919	-0.282037	0.665587	-0.00344422	-1.20347	-0.912354	0.105912	0.181536	-0.0609121	0.157794	0.493495	-0.345233	-0.0308513	0.0950657	0.249902	-0.863056	0.268119	-0.538122	0.349335	0.242685	0.430431	0.421408	0.403087	0.0272025
ENSG00000101938	Q9BU40	CHRDL1	2	-0.231308	-0.415089	-0.458756	-0.758814	-0.992665	-0.576316	-0.66616	0.140286	-0.0122651	1.72085	0.000435982	0.686878	-0.0210055	0.194793	-0.267726	0.772644	-0.370383	0.0818568	-0.109235	0.676186	-0.0297295	0.434984	-0.0892303	0.289766
ENSG00000101966	P98170	XIAP	5	-0.438358	-0.185711	0.0731559	-0.248295	0.229289	0.0607617	-0.251274	0.276818	-0.193958	0.0661931	0.215548	0.11262	-0.228955	0.110822	-0.172431	0.00465596	0.272636	0.125873	-0.0506884	-0.11483	0.0625687	0.0182747	0.205829	0.0494534
ENSG00000101972	Q8N3U4	STAG2	1	0.149408	-0.00849325	0.104324	0.0199097	0.169379	-0.0119404	-0.174858	-0.00703134	-0.157902	-0.0868786	0.411695	0.0281918	-0.165149	-0.213375	-0.195095	-0.203577	0.348417	-0.152301	0.104609	-0.303001	0.216572	-0.0482464	0.192475	-0.0171327
ENSG00000102003	P08247	SYP	9	0.229572	0.161958	0.452231	0.107052	0.646574	0.425864	-0.308567	0.231391	0.0751192	0.290971	-0.0768633	-0.13822	-0.115944	0.197057	-0.294435	-0.71191	-0.042323	0.224709	-0.324327	-0.38057	-0.231566	-0.365752	0.0637455	-0.115764
ENSG00000102024	P13797	PLS3	1	0.558798	0.105293	-0.160852	1.02035	0.55466	1.12835	1.3483	0.254286	1.28434	0.142759	0.0563549	-1.01818	0.993216	-0.660102	-0.181548	-0.826063	-0.0577212	-1.13783	-0.546855	0.120212	-0.878411	-0.298949	-0.0806879	-1.71972
ENSG00000102038	P28370	SMARCA1	1	0.336959	0.28001	0.1255	0.30014	0.0017494	-0.0760082	0.363258	0.0781579	0.126943	0.0182943	-0.18203	-0.349589	0.309026	0.27943	0.0754198	-0.0560261	-0.190831	-0.0665519	-0.302621	-0.278733	-0.140126	-0.101907	-0.503296	-0.0471701
ENSG00000102054	Q16576	RBBP7	1	0.0103886	0.554542	-0.163194	0.111224	-0.00129014	-0.136014	0.494388	0.316347	0.00956423	-0.192398	-0.173184	-0.216198	0.164629	-0.11607	0.17552	0.0612124	0.0282885	-0.261698	-0.285374	-0.257967	0.00764313	0.163952	-0.204192	-0.09012
ENSG00000102081	Q06787	FMR1	6	0.0198699	-0.174168	-0.109323	-0.132782	0.0675543	-0.160668	0.129081	-0.128991	0.246304	-0.00149425	0.00272496	-0.0169207	0.148651	-0.23052	0.110023	0.0856766	-0.0041462	-0.143322	0.0686313	-0.0140399	0.0626413	0.0600222	0.00555156	0.109643
ENSG00000102098	Q9UQR0	SCML2	1	0.297514	0.0981703	-0.161348	0.261368	0.0328877	-0.128595	0.157169	0.0372233	0.345788	-0.0797745	0.0806242	0.0415107	0.052596	0.0676833	0.0435829	0.135244	-0.135792	-0.227992	-0.34266	0.158109	0.0565962	-0.322573	-0.371153	-0.096178
ENSG00000102109	Q9UHG2	PCSK1N	9	-0.977605	0.245567	0.68193	-0.24057	-0.114503	0.326707	-0.243871	-0.192464	-0.403561	-0.0695862	0.810172	0.56949	-0.331425	-0.364402	-0.324518	0.338106	-0.396411	0.172814	-0.560444	0.195178	0.0467117	0.490177	-0.0300422	0.372548
ENSG00000102144	P00558	PGK1	4	0.442599	0.0844881	0.433196	0.259253	0.523943	0.14442	0.307224	-0.21283	0.488937	-0.215422	-0.728261	-0.560825	0.343314	-0.0306298	0.396437	0.18725	-0.783459	-0.485054	0.0753127	0.860224	-0.0257535	-0.17722	-0.816908	-0.510234
ENSG00000102172	P52788	SMS	9	-0.0049375	-0.298528	0.163816	0.285545	-0.127579	0.25971	-0.0917089	0.231119	0.0180779	0.14036	-0.206236	-0.0927041	-0.218604	0.485009	-0.188072	0.0116264	-0.173371	-0.222177	0.0345415	0.141721	-0.132776	0.124577	-0.12308	-0.0163296
ENSG00000102218	O75695	RP2	1	0.22036	0.203568	-0.0209837	0.635408	-0.697833	-0.778691	0.997334	0.0214574	0.503688	-0.187219	-0.131318	-0.758135	0.530178	0.191556	0.187199	-0.504827	0.464836	-0.669208	0.435966	-0.242024	0.57054	-0.506894	0.166884	-0.631842
ENSG00000102221	Q92613	JADE3	5	-0.114589	-0.0608639	-0.175388	0.191126	0.0584926	-0.0199481	-0.07764	-0.507565	0.303763	-0.0743905	0.0848579	0.0641064	0.190194	-0.493807	0.0880481	-0.131538	-0.108994	0.00653865	0.119182	0.15064	0.160477	0.110943	0.0606862	0.175667
ENSG00000102290	Q9BZA7	PCDH11X	5	-1.40655	-1.11495	0.842899	-0.121605	0.683576	0.51756	-0.584906	-0.499849	0.000456432	-0.617004	0.786228	0.5129	-0.829325	-0.0772635	-0.610796	-0.264222	0.532119	0.402983	0.225117	0.57637	0.559695	-0.0329474	0.0367611	0.482747
ENSG00000102390	Q9BVG4	PBDC1	5	-0.000438373	-0.125705	-0.164595	-0.168421	-0.099513	-0.422677	0.377412	-0.225396	0.177863	-0.253098	0.0944265	0.069235	0.34066	-0.0024995	-0.0305866	0.237777	-0.183928	-0.0308955	0.10604	0.0146829	-0.0445476	0.0737963	0.125157	0.135252
ENSG00000102393	P06280	GLA	5	0.0351189	-0.279608	0.092328	0.285322	0.0603688	-0.0492175	0.324257	0.194346	0.0433312	0.317953	-0.35887	0.00784647	0.0312759	0.169967	-0.146386	0.547891	-0.54914	-0.17312	-0.215242	0.0427591	0.237888	-0.0467057	-0.305005	-0.267358
ENSG00000102401	Q9UH62	ARMCX3	9	-0.290424	-0.376327	0.26364	-0.336416	0.208047	0.0106263	0.313343	0.488862	-0.0633476	0.336109	0.0848407	-0.0315429	-0.107427	0.0568324	-0.0970014	0.226259	-0.112351	0.00451905	-0.0817797	0.0477611	-0.338313	0.206024	-0.193782	-0.218152
ENSG00000102531	Q9Y2H6	FNDC3A	1	0.648687	0.394515	0.0852524	0.258476	-0.078753	-0.202295	0.326272	-0.284494	0.384867	-0.143743	-0.132564	-0.132374	0.222049	-0.20009	-0.066122	-0.278224	-0.0341932	-0.220979	0.049366	0.052247	-0.0433931	-0.0249146	-0.336164	-0.243429
ENSG00000102595	Q9NYU1	UGGT2	1	0.0870611	-0.156784	-0.379071	-0.150784	-0.250559	0.250108	-0.0989114	-0.107291	-0.0842456	-0.254616	-0.0549215	0.280725	-0.198374	-0.127407	0.0542206	0.237274	-0.0648098	0.023098	0.175811	0.251756	0.254639	0.274605	0.084809	-0.0463327
ENSG00000102606	Q14155	ARHGEF7	8	-0.251545	-0.131154	-0.138929	0.0219655	-0.124845	-0.116143	-0.120255	-0.116549	-0.0581919	-0.0494513	0.0944576	0.188701	0.163754	0.0471976	-0.0517233	-0.0819768	0.0134134	-0.0296222	0.166367	-0.0217872	0.272325	0.203273	0.158279	-0.0375595
ENSG00000102710	Q8NEM7	SUPT20H	9	-0.363393	-0.0279173	0.00293039	-0.146607	-0.267463	0.351715	-0.133891	-0.0176805	0.0413649	-0.123624	0.120687	0.102802	0.325545	0.315537	-0.236792	0.11615	0.184037	-0.0978702	-0.0504339	-0.3178	0.213782	-0.0572029	-0.0869787	0.153104
ENSG00000102738	Q92665	MRPS31	3	0.152097	0.377043	-0.127518	0.227663	-0.0949961	-0.0449017	0.243564	-0.0235525	-0.00917583	-0.060576	-0.0151883	-0.240312	0.249953	-0.0835431	0.170514	0.090607	0.0528151	-0.239481	-0.0777071	-0.300681	0.0944026	0.188648	-0.351348	-0.178325
ENSG00000102781	Q9BW62	KATNAL1	7	-0.169484	-0.282213	0.540661	0.0102519	0.266212	0.211234	-0.471975	-0.155042	0.0709103	-0.00321275	0.441573	-0.0147835	0.0154388	0.297743	0.280322	-0.481737	0.126296	-0.437691	0.613612	0.010077	0.00348968	-0.335793	-0.25984	-0.276049
ENSG00000102879	P31146	CORO1A	9	0.121936	0.661062	0.00985718	0.308327	0.495105	-0.246759	0.224724	0.296221	0.331075	-0.00581089	-0.541053	0.0955247	-0.0749275	0.0841529	-0.380406	0.0924353	-0.702264	0.0222645	-0.387767	0.0176706	0.68351	0.000197183	-1.11994	0.0148636
ENSG00000102893	Q93100	PHKB	5	-0.0661043	0.0755902	-0.4196	0.0369105	-0.301796	-0.195033	0.0915082	-0.221209	0.0613217	-0.046855	-0.104758	-0.126911	0.05537	-0.115985	0.184789	0.331166	-0.0424394	-0.0116197	0.098499	-0.185259	0.341023	0.425387	0.101045	0.0349613
ENSG00000102900	Q8N1F7	NUP93	5	-0.194002	-0.207748	0.504905	-0.150547	0.470942	0.528558	-0.358499	0.0792765	-0.450214	-0.070308	-0.187711	-0.127258	-0.215313	-0.0145391	-0.124213	0.130083	-0.354869	-0.152227	-0.169312	0.189876	-0.16562	0.719196	0.111406	0.208137
ENSG00000102935	Q2M1K9	ZNF423	4	-0.492933	-0.496169	0.280708	-0.0140691	0.242973	0.510502	-0.104644	0.575799	-0.179936	0.0892783	0.619315	-0.194364	-0.360685	0.109888	-0.124556	0.0320044	0.426557	-0.157324	-0.26941	-0.265786	-0.25892	-0.181503	0.425756	-0.212481
ENSG00000102978	P19387	POLR2C	5	0.374678	0.0542215	-0.292827	0.125323	-0.38016	-0.305347	0.425733	-0.0417898	0.0911296	-0.00810103	0.0616308	-0.0199654	0.224327	-0.148669	-0.0192127	-0.0664367	0.085721	-0.215397	0.135635	-0.125908	0.178571	-0.255537	0.15249	-0.0301103
ENSG00000103005	Q9BQ65	USB1	9	-0.201121	0.360034	0.521552	-0.529027	0.583574	0.39956	0.273087	0.269208	0.343213	0.415542	-0.316018	-0.401213	-0.0730649	0.109302	0.120126	0.211554	-0.232924	0.0311194	-0.689623	-0.228282	-0.763977	-0.0438259	-0.176172	0.0173763
ENSG00000103034	Q9ULP0	NDRG4	7	-0.0903075	-0.28154	0.152209	-0.140643	-0.236492	0.299187	0.271113	0.423759	-0.307823	-0.00642293	0.138427	-0.285228	-0.359168	0.279409	0.37968	0.205025	0.536644	0.243567	-0.487098	0.110384	-0.145702	-0.179873	0.116494	-0.6356
ENSG00000103051	Q9H9E3	COG4	3	0.101147	-0.129525	0.0484017	0.17562	0.235626	0.259424	-0.230782	0.00408037	-0.0719206	0.308221	-0.0946293	-0.0957239	0.375088	0.193121	-0.0111832	-0.155013	-0.110557	-0.18191	-0.0168044	-0.166769	-0.0434334	-0.101951	-0.240728	-0.0497995
ENSG00000103066	Q8NCC3	PLA2G15	9	-0.199331	-0.552335	0.271321	-0.49065	0.235461	0.282668	0.225478	2.16e-05	0.457622	0.365778	0.0352619	0.236398	-0.151076	0.220293	-0.316187	0.0600752	-0.28136	0.280737	-0.346658	0.15805	-0.808826	0.175983	-0.199595	0.340872
ENSG00000103150	O95822	MLYCD	9	-0.453486	-0.423062	0.622077	-0.207762	0.555801	0.410811	-0.608272	0.736501	-0.496845	0.526332	-0.533772	0.499838	-0.29373	0.367605	-0.701256	0.266275	-0.608735	0.0970194	-0.250413	0.0888243	-0.169617	0.277214	-0.0787749	0.377426
ENSG00000103160	Q3SXM5	HSDL1	9	-0.188956	0.199024	-0.197187	-0.338621	0.281755	0.208324	-0.17467	-0.0823283	0.162627	0.149289	-0.156959	0.297098	-0.0439993	0.182274	0.273394	0.274526	-0.616871	0.0717179	0.036354	0.161553	-0.163032	0.253937	-0.695162	0.105913
ENSG00000103187	Q14019	COTL1	9	-0.216804	-0.536509	-0.0893119	0.171871	-0.0400648	-0.254766	0.0821021	0.664644	-0.20252	1.10409	-0.712284	-0.132732	-0.0498944	0.718169	0.135071	0.678971	-0.640815	0.267894	-0.790804	0.0347874	-0.365745	0.384294	-0.388876	0.179233
ENSG00000103197	P49815	TSC2	8	-0.195181	-0.0861866	-0.00331481	0.0880723	0.187264	0.115286	-0.0549086	0.208238	0.094303	0.292021	-0.12705	-0.0619096	0.0663947	0.23535	-0.245258	-0.145451	-0.152065	-0.0259902	-0.115515	-0.0643774	-0.0223742	0.0392165	-0.0119597	-0.0146045
ENSG00000103274	P53384	NUBP1	1	0.361345	-0.477563	0.64768	-0.00234683	0.0618089	-0.451398	0.38904	-1.00783	0.273873	-0.88996	0.487749	-0.31775	0.372439	-0.797699	0.776005	0.0549357	0.287825	-0.709754	0.462042	0.33375	0.172237	-0.179886	0.127052	0.026401
ENSG00000103275	P63279	UBE2I	6	0.288741	0.195179	0.016347	-0.0567089	-0.0338825	-0.0231708	0.157323	0.224853	0.158126	0.0255093	-0.36313	-0.289033	0.149413	-0.159263	-0.108904	-0.226858	-0.228832	0.0646613	0.163067	-0.132853	0.11534	-0.0526541	0.0342516	0.0824791
ENSG00000103351	Q96AJ1	CLUAP1	4	0.160918	0.165892	-0.0281338	0.0973921	0.189277	0.13885	-0.169828	0.0152257	-0.0800853	0.133065	-0.108908	-0.0715594	-0.00168195	0.0397406	-0.029613	0.0587629	-0.0658528	0.0950457	0.00875717	-0.259011	-0.15418	-0.0429846	-0.13381	0.0427206
ENSG00000103365	Q9UJY4	GGA2	4	0.17074	0.266553	-0.156136	0.241939	-0.211387	0.0462694	0.332257	-0.110574	0.382901	-0.0454411	-0.282927	0.0186849	0.227966	-0.222531	0.0202432	0.219966	-0.162287	-0.0718073	-0.110032	-0.201268	-0.0724498	-0.0185839	-0.0813936	-0.180703
ENSG00000103404	Q70CQ4	USP31	9	-0.496633	-0.253494	-0.423598	0.0291864	-0.147751	-0.476276	0.239822	-0.221962	-0.0478538	-0.11024	0.56729	0.266449	-0.290498	-0.354611	-0.0333905	0.193395	0.0836829	0.0922054	0.169874	0.561618	-0.00380891	0.123899	0.198749	0.333947
ENSG00000103415	P30519	HMOX2	8	-0.603357	-0.842333	0.577096	-0.0780341	0.664606	0.433019	-0.348881	0.843775	-0.02719	0.428077	-1.11225	0.227609	0.0578315	0.748591	-0.709575	0.163671	-0.441499	-0.106736	-0.369496	-0.189226	-0.16727	0.367866	0.254316	0.229392
ENSG00000103485	Q15274	QPRT	1	-0.291694	0.699779	0.767119	-0.105862	0.163813	-0.144545	-0.825568	-0.374911	0.246486	-0.196886	0.435639	0.556627	-0.00572712	-0.856373	0.87298	-0.419635	0.28055	-1.06681	0.615719	0.0853553	-0.569125	1.05391	0.198981	-1.11982
ENSG00000103495	P56270	MAZ	3	0.241545	0.180545	0.053311	0.657224	-0.185876	-0.333126	0.36675	0.392686	0.395112	0.161376	-0.318216	0.112754	0.339675	0.130994	0.108999	-0.256342	-0.75415	-0.0697159	0.0955508	-0.212775	0.192765	-0.235763	-0.690197	-0.373126
ENSG00000103550	Q1ED39	KNOP1	1	0.270658	0.319207	-0.0860717	0.414454	-0.232879	-0.000368073	0.24493	0.334379	-0.0357501	0.173292	-0.291992	-0.0300467	0.0557922	0.0166032	-0.115116	-0.161738	-0.388505	-0.198249	-0.250219	-0.121982	0.170353	-0.0708613	0.0506726	-0.0665627
ENSG00000103591	Q6PD74	AAGAB	4	-0.17008	-0.0153085	0.344049	0.296013	0.303246	0.127731	0.397039	0.10839	0.263325	-0.5415	-0.0902284	0.034775	-0.130026	0.0101959	0.0308848	-0.0461495	-0.486473	-0.0839409	-0.0611564	-0.161841	-0.124464	0.216109	0.0782389	-0.298829
ENSG00000103653	P41240	CSK	9	0.149184	0.0750414	0.0187327	0.273789	-0.135357	-0.0521348	-0.213015	0.254012	-0.311196	0.108932	-0.241656	-0.0887772	-0.0789593	0.161203	-0.206292	0.12639	0.0594586	0.216977	-0.173445	0.0803779	-0.0737227	-0.0294334	-0.0830245	0.162915
ENSG00000103657	Q15751	HERC1	8	0.0684929	-0.176518	0.34225	0.259911	0.166572	0.0410981	-0.375087	0.253965	0.019642	0.109172	-0.00281858	0.186605	0.217693	0.286011	-0.421822	-0.212902	-0.271244	-0.278835	0.0443278	0.171712	-0.0918979	0.0275367	-0.289722	-0.0741431
ENSG00000103723	Q13367	AP3B2	9	-0.0870226	0.010258	0.147583	0.103248	0.511612	0.140505	0.121706	0.0672739	-0.00424941	0.242885	-0.332608	-0.263062	0.0641318	0.0214468	0.0192666	-0.145103	-0.058035	0.0335794	-0.0416754	-0.0661842	-0.304537	0.0260355	-0.14344	-0.0636146
ENSG00000103978	Q8NBN3	TMEM87A	6	-0.0375992	0.173863	0.0719442	-0.0363876	-0.0773458	-0.0324934	-0.616421	0.351226	-0.236578	-0.181523	0.161149	0.245363	0.090872	0.134232	-0.251576	-0.204549	0.0377481	-0.115338	0.136895	0.114541	0.352918	-0.0788463	-0.0454416	0.0433466
ENSG00000104064	Q06547	GABPB1	2	0.0906963	-0.550818	-0.182289	-0.150166	-0.190639	0.240441	0.186012	-0.461975	0.190325	-0.36652	-0.143377	-0.259428	0.0708899	-0.276923	0.0663181	-0.146738	-0.170408	0.0855063	0.90677	0.188946	0.648027	-0.31279	0.102753	0.435388
ENSG00000104067	Q07157	TJP1	1	0.092597	0.241623	-0.126036	-0.114727	0.156014	0.0541361	-0.618678	-0.340876	-0.555202	-0.685396	0.671924	0.644174	-0.24289	-0.0833956	-0.181642	-0.39244	0.452503	-0.280178	-0.215967	0.235178	0.44725	0.297418	0.700415	-0.155803
ENSG00000104112	Q8WXD2	SCG3	9	0.652972	-0.309294	0.284824	-0.29979	-0.112428	-0.325425	0.288998	0.372351	-0.389532	0.322095	0.00536471	-0.240208	0.0135861	0.275947	-0.333371	0.24571	0.125497	0.147001	-0.152954	-0.371376	-0.221923	0.0447245	-0.0428531	0.0200854
ENSG00000104129	Q9NVM6	DNAJC17	5	-0.0673582	-0.0669507	-0.0866392	-0.20865	-0.0553559	-0.112704	0.204789	-0.228665	-0.14104	0.182486	0.170817	0.232918	-0.329418	0.153731	0.17497	0.14257	0.0105841	0.107641	-0.281287	0.0695622	0.314489	-0.0966477	-0.206404	0.116561
ENSG00000104177	Q9P2K5	MYEF2	6	-0.00911273	-0.331303	0.131897	-0.197741	0.134065	-0.000380235	-0.0566596	0.139082	0.041393	0.0707861	0.0909094	0.0926344	-0.0658152	0.168896	-0.0297517	-0.079587	-0.000422118	-0.0888618	-0.236201	-0.0521606	0.0237277	0.0593631	0.148314	0.0469273
ENSG00000104231	Q8TCF1	ZFAND1	9	0.173698	0.200757	-0.412069	-0.0364306	0.197268	-0.388318	0.0374777	0.0763471	-0.34309	-0.0101145	0.200689	0.139548	0.0894267	-0.136014	-0.226849	0.353575	0.283447	0.00333491	-0.0338791	-0.10041	-0.368482	0.0226069	0.00349257	0.27399
ENSG00000104320	O60934	NBN	1	0.388715	0.107261	-0.0730848	0.264762	-0.165699	-0.123565	0.0611392	-0.494445	0.161368	-0.274515	0.243053	-0.245656	0.19594	-0.244076	0.173932	-0.322804	0.267274	-0.142091	0.250665	-0.261868	0.237038	-0.313916	0.255948	0.0546259
ENSG00000104325	Q16698	DECR1	2	0.346218	0.0771131	0.0766968	-0.130961	-0.402957	-0.0801184	0.320381	0.134811	0.401097	0.451905	-0.287769	-0.567397	0.0443586	0.26705	0.00543947	0.345888	-0.0430245	-0.419695	0.148472	-0.269397	0.104581	-0.596458	-0.0831158	0.156881
ENSG00000104331	Q9NX62	BPNT2	6	-0.48182	-0.477593	-0.124595	-0.405087	-0.0401382	-0.431801	-0.0152769	-0.199961	0.156815	-0.011924	0.0299736	0.449265	0.0131699	0.176243	0.142882	0.182834	-0.0970234	-0.0257009	0.102171	0.342245	0.185019	0.128029	0.118647	0.283625
ENSG00000104332	Q8N474	SFRP1	1	0.00953334	0.292081	-0.854917	-0.00788817	-0.0900941	0.159773	0.171756	-0.329744	0.341271	-0.474598	-0.00483775	-0.193985	0.285375	1.28271	-0.0735162	-0.715318	-0.466336	-0.143727	0.505105	0.00644876	0.517394	-0.181185	-0.0961052	0.0608059
ENSG00000104365	O14920	IKBKB	2	0.0879633	0.305933	-0.308474	0.25353	-0.199783	0.0144751	0.151194	-0.325758	0.372076	-0.234656	0.315388	-0.0540643	0.188399	-0.299936	0.00315208	-0.110257	0.0232621	-0.2608	-0.0487229	-0.145529	0.065101	0.174966	-0.0204547	0.0529955
ENSG00000104381	Q8TB36	GDAP1	8	0.0513048	0.177468	-0.13778	-0.228522	0.0503335	0.178509	0.0191375	-0.102422	0.0696676	0.147041	-0.28918	-0.140927	-0.030488	0.199461	-0.0512239	0.195472	0.0618112	0.0634381	-0.132092	-0.22116	-0.0312783	0.293151	-0.291316	0.149594
ENSG00000104388	P61019	RAB2A	9	-0.358051	-0.318658	0.52559	-0.213949	0.619032	0.313328	-0.163873	0.694019	-0.0168105	0.443745	-0.238793	-0.0570024	0.0131913	0.462035	-0.476332	-0.286747	-0.154662	-0.00957424	-0.237436	-0.255717	-0.108503	-0.13277	-0.0426093	0.000544748
ENSG00000104408	P60228	EIF3E	3	0.0857507	0.390617	-0.288168	0.328984	-0.0172513	-0.243666	0.0880462	0.374452	0.185339	0.462346	0.160105	0.220857	0.153575	0.306104	-0.175955	-0.118376	0.114107	0.228429	-0.437411	-0.941601	-0.15394	-0.641857	0.0754847	-0.15597
ENSG00000104419	Q92597	NDRG1	9	-0.56448	-0.86438	0.414012	0.597062	0.128999	0.445437	0.117731	0.351531	-0.596155	0.0442565	-0.453761	0.195339	0.390295	-0.185187	-0.282913	0.139424	0.541071	0.218518	0.125382	0.177205	-0.51984	0.337495	-0.683347	-0.073694
ENSG00000104427	Q96GY0	ZC2HC1A	8	-0.0759757	-0.275408	-0.00258966	-0.500455	-0.0687942	0.0140833	0.328634	0.162219	0.0455151	0.222224	-0.34714	-0.0599294	0.0105006	0.0998344	-0.0496938	0.688068	-0.149924	0.280439	-0.29311	0.12194	-0.361925	0.192207	-0.335288	0.354569
ENSG00000104435	Q93045	STMN2	9	-0.426177	0.707022	0.328891	-0.0610404	0.142271	-0.0759947	-0.176286	0.963899	-0.323944	0.832174	-0.258728	-0.161896	-0.29563	0.394519	-0.238951	-0.348921	0.0306073	0.573296	-0.964404	-0.706047	-0.550392	-0.356725	0.378196	0.594261
ENSG00000104442	Q9NVT9	ARMC1	9	0.116711	-0.197729	0.354946	-0.173277	0.0551062	0.0469977	-0.268184	0.155006	0.0804353	0.102655	-0.307946	0.211852	-0.2942	0.102115	-0.0856772	0.398644	-0.319564	0.155601	-0.131795	0.144914	-0.421676	0.205029	-0.119287	0.189321
ENSG00000104472	Q9NRG0	CHRAC1	1	0.0184027	0.0501649	-0.939995	0.826465	-0.659209	-0.910033	0.433882	-0.319575	0.293555	-0.620529	0.232563	-0.297112	0.256004	0.0469273	0.693983	-0.388392	0.593237	-0.556782	0.677022	-0.153528	0.393938	0.432968	-0.0344882	-0.0694695
ENSG00000104490	P61601	NCALD	4	0.127199	0.00145513	0.664051	0.0690435	0.425362	0.324501	-0.0332474	0.113487	0.180286	0.34681	-0.445809	0.275572	0.522414	0.245121	-0.317713	0.476389	-0.806776	0.0268187	-0.538594	-0.151101	-0.469182	-0.227459	-1.05048	0.241852
ENSG00000104517	O95071	UBR5	5	-0.0591957	0.0229326	0.0174534	-0.106681	0.0838043	-0.0843894	-0.0177441	-0.116796	0.0248782	0.0343883	-0.132732	0.0208008	-0.0395317	-0.0632276	-0.0469873	0.179886	-0.0629031	0.087558	0.00552083	0.130821	-0.0348372	0.0347315	0.0163826	0.105869
ENSG00000104529	P29692	EEF1D	1	0.341787	0.86363	-0.114606	0.358534	0.243306	0.0697216	0.0420531	0.0442335	0.0582524	0.291906	-0.271051	-0.392002	-0.0630037	0.0901017	-0.0827442	-0.378171	0.16196	-0.0377547	-0.0830793	-0.497819	-0.231052	-0.339192	0.146018	-0.221029
ENSG00000104549	Q14534	SQLE	4	0.0951113	0.20405	0.497813	0.0622878	0.495476	-0.174982	0.183502	0.566844	-0.369135	0.25243	-0.493087	0.0316724	-0.114792	0.206062	-0.28167	0.257342	0.0264102	0.275617	-0.0889438	-0.727632	0.24828	-0.272462	-0.32629	-0.553902
ENSG00000104643	Q96QG7	MTMR9	8	-0.442139	-0.23115	0.214324	-0.510097	0.118787	-0.0989636	-0.300944	-0.0158606	-0.200868	0.209862	0.152971	0.271172	-0.124934	0.0323144	-0.00657571	0.0797684	0.317074	0.141918	-0.268347	-0.384398	0.360106	0.260393	0.101695	0.323894
ENSG00000104671	O00399	DCTN6	8	-0.278305	-0.530658	0.605785	-0.598678	0.240044	0.190162	-0.263179	0.683958	0.194584	0.623034	-0.146504	-0.109179	-0.250994	0.371826	-0.212358	0.0108655	-0.198243	-0.003371	-0.361361	0.0833692	-0.0427779	0.0704489	-0.114754	0.0362865
ENSG00000104679	Q9Y3T6	R3HCC1	7	0.125249	-0.00888675	0.289946	-0.409438	0.20997	0.00797745	-0.0831821	0.0943297	-0.137821	0.27635	-0.176098	0.353432	0.0192226	0.17639	-0.20702	-0.289557	-0.0561619	0.181612	-0.308593	-0.204485	-0.117512	-0.0445093	0.19651	0.112273
ENSG00000104687	P00390	GSR	8	0.0586117	0.00281149	-0.0842122	0.0695033	-0.365265	0.237259	-0.29215	0.125551	-0.421387	-0.179723	-0.228105	-0.277107	0.00791325	0.274551	0.0974431	-0.351102	0.374622	-0.0710908	0.185568	0.0360088	0.32502	0.210803	0.291322	-0.0268459
ENSG00000104723	Q13454	TUSC3	7	-0.399762	-0.00862169	-0.0158392	-0.227027	0.047587	0.28	0.0621673	0.360236	-0.105156	0.345538	-0.535451	-0.0204909	-0.273014	0.0108732	0.102648	0.603734	-0.212196	0.177216	-0.235582	0.12778	-0.0579958	0.302841	-0.459921	0.130436
ENSG00000104731	Q8TBB5	KLHDC4	5	-0.106461	-0.247486	-0.659978	0.106056	-0.132601	0.413871	-0.011894	-0.135292	-0.309751	0.023879	0.617084	0.237109	-0.053236	-0.33799	-0.129394	-0.295152	0.0685833	0.183758	0.0691298	-0.14482	0.254765	-0.116131	0.331882	0.374068
ENSG00000104738	P33991	MCM4	1	0.439823	0.245327	0.739521	0.00536469	-0.0156214	0.0968611	0.116928	-0.354499	0.141061	0.165586	-0.0476359	-0.314588	0.20957	0.531553	-0.14802	0.206045	-0.115402	-0.312575	0.11496	0.0398188	-0.333902	-0.28176	-0.872719	-0.255697
ENSG00000104763	Q13510	ASAH1	9	-0.507986	-0.0246898	0.281969	-0.69919	-0.0548972	0.159183	0.139083	0.619987	-0.0607047	0.250082	0.246614	0.435386	-0.196384	0.37044	-0.28924	0.118647	0.251199	-0.0156064	-0.289101	-0.278321	0.00497965	-0.497597	0.100386	-0.0642386
ENSG00000104805	Q02818	NUCB1	3	0.0119839	0.0509676	-0.287768	0.528361	-0.0701176	-0.0954722	0.153441	-0.118986	0.177348	-0.065844	0.265305	-0.279109	0.0946415	-0.22221	0.242514	-0.249616	0.462147	-0.125193	0.186578	-0.463748	-0.232445	-0.321653	0.669513	-0.310638
ENSG00000104812	P13807	GYS1	4	0.16717	0.027049	0.139963	0.760032	0.286538	0.100849	0.100427	0.125624	0.135759	-0.0542304	-0.266574	-0.0502199	0.0015925	0.0457108	0.0526001	-0.421945	-0.205923	-0.267584	0.0670876	-0.107791	-0.394042	-0.131936	0.137967	-0.248124
ENSG00000104824	P14866	HNRNPL	3	0.365309	0.212184	0.136176	0.274044	-0.179525	0.0203712	0.302857	0.150684	0.170462	0.194559	-0.2766	-0.34938	0.249953	0.148214	-0.070458	-0.179745	-0.329445	-0.216868	0.168404	-0.184884	0.0665439	0.0168579	-0.399059	-0.290654
ENSG00000104833	P04350	TUBB4A	9	0.377695	-0.260491	0.201135	-0.866187	0.0212588	0.0905007	-0.333661	0.135574	-0.504068	0.173584	-0.522544	0.8369	-0.983791	0.0678605	-0.0412107	0.345012	-0.1989	0.0631735	0.695329	0.0591097	-0.0604441	-0.0160281	0.287689	0.432503
ENSG00000104960	Q86YD1	PTOV1	4	0.0604836	-0.112665	0.111272	0.142756	0.0456426	0.0424838	0.336921	0.434819	0.193809	0.341206	-0.386073	-0.207787	0.227353	0.325021	-0.0542152	-0.00197859	-0.357798	-0.019981	-0.10119	-0.277118	-0.0581717	-0.0555759	-0.317588	-0.311626
ENSG00000104967	Q9UNW9	NOVA2	9	-0.713732	-0.60415	-0.3145	-0.225689	-0.339242	-0.31445	0.283062	0.499805	-0.00141925	0.37027	-0.0512879	0.195389	0.0164419	0.383291	-0.271634	0.3456	-0.246682	0.194493	-0.162998	0.229623	-0.145915	0.522482	-0.0396731	0.390915
ENSG00000104969	O43765	SGTA	9	-0.254348	-0.261956	0.223451	-0.190473	0.106568	0.143661	-0.0529397	0.363992	-0.150973	0.213764	-0.301184	0.0129244	-0.0925085	0.315719	-0.155748	0.245459	-0.268517	0.11152	-0.0769086	0.00217181	-0.062242	0.152053	-0.250703	0.227216
ENSG00000105058	Q9Y421	FAM32A	6	0.0549749	-0.453393	-0.0369444	-0.19002	0.113292	-0.0166072	0.0306483	0.348657	0.00608237	0.407598	-0.183013	0.138497	-0.132472	0.278364	-0.334804	0.139099	-0.273663	0.179804	-0.0342275	0.141631	-0.102153	0.0538507	-0.0895951	-0.0456069
ENSG00000105127	O43823	AKAP8	2	0.168583	0.0246358	-0.282875	-0.0032381	-0.0237195	-0.127618	0.0209067	-0.30231	-0.0169766	-0.263822	0.19543	0.0703217	0.11212	-0.501631	0.0606746	0.18882	0.227649	-0.0421087	0.105769	0.0184518	-0.0387386	-0.0966671	0.382351	0.123993
ENSG00000105220	P06744	GPI	4	0.243158	0.483415	-0.216798	0.79906	-0.0536639	-0.0154052	0.346825	-0.078474	0.447595	0.0400249	-0.0758727	0.0278933	0.102632	-0.00706111	0.0665408	-0.176043	-0.587846	-0.237877	0.0334176	0.272751	-0.404092	-0.391567	-0.403281	-0.215331
ENSG00000105221	P31751	AKT2	2	-0.273282	-0.0298233	-0.372981	-0.369219	-0.160495	-0.214953	0.103989	0.150983	-0.067417	0.257095	-0.0506699	-0.0492336	-0.114786	-0.105142	0.1425	0.248436	0.061781	0.197448	0.17147	0.043008	0.0548425	0.207055	0.0547679	0.114628
ENSG00000105223	Q8IV08	PLD3	9	-0.0475183	-0.138096	0.749763	0.210399	0.863082	0.661134	-0.0684558	0.654144	-0.126736	0.591773	-0.444163	-0.257424	-0.267233	0.41318	-0.245579	0.0263271	-0.167796	-0.0759252	-0.752393	-0.369956	-0.79065	-0.120652	-0.065733	-0.231491
ENSG00000105245	Q9Y6R0	NUMBL	6	-0.453023	0.254532	-0.29308	-0.232966	-0.00184364	-0.0790313	0.0861493	-0.0213732	-0.0866546	0.132151	-0.00652514	0.196842	-0.0718007	0.0641349	-0.157681	-0.0898454	0.176815	0.229221	-0.338946	0.313124	-0.0961416	0.111237	0.0842016	0.280504
ENSG00000105254	Q99426	TBCB	9	0.0107002	0.248254	0.778111	-0.188577	0.592166	0.434472	0.175844	0.442856	-0.124623	0.381467	-0.637632	-0.220795	-0.288764	0.360422	-0.24479	-0.073408	-0.34027	-0.0364297	-0.312411	0.0356774	-0.254359	-0.136142	-0.310449	-0.291322
ENSG00000105255	Q9BTV5	FSD1	9	0.198804	0.313005	0.290976	0.127115	0.221446	0.285436	-0.0327582	0.226551	-0.0635838	0.0542904	-0.316926	-0.145407	-0.172653	0.326192	0.14371	0.116736	-0.177518	-0.111693	-0.484484	-0.0731752	-0.321723	0.0139064	-0.346603	-0.0716447
ENSG00000105270	Q96DZ5	CLIP3	9	-0.4058	-0.0299897	-0.36636	0.243199	-0.0967436	-0.310221	-0.071333	0.136192	0.0392645	0.0276028	0.0616433	0.100643	-0.236597	-0.0256315	-0.343547	-0.113202	0.181872	0.117353	-0.135173	0.0436517	0.206965	0.353547	0.275222	0.347443
ENSG00000105281	Q15758	SLC1A5	1	-0.136379	-0.211022	-1.24638	0.099024	-1.45084	-0.36197	1.29661	-0.433975	0.038847	1.28696	-0.518919	0.578331	0.0944687	-0.171443	0.506428	0.305673	0.000442498	0.319512	0.123299	-0.322911	0.44691	-0.791297	0.000349035	0.548289
ENSG00000105290	P51693	APLP1	9	-0.416356	-0.87752	0.407783	-0.222841	0.220187	0.535096	-0.270455	0.347874	0.293863	0.0999416	0.0757552	-0.292489	0.461553	0.484048	-0.423595	-0.410009	0.115916	-0.426688	0.147082	0.0663237	0.0254678	-0.0390375	0.103848	-0.00574838
ENSG00000105321	Q9Y3X0	CCDC9	2	0.277658	0.479355	0.149203	0.349789	-0.388885	0.0286525	0.307654	-0.167024	-0.0676297	-0.673007	0.322579	-0.261552	0.210497	-0.287424	0.0439321	-0.225155	0.454758	-0.0820982	-0.138386	-0.00676358	-0.236674	-0.393689	0.583777	-0.279566
ENSG00000105323	Q9BUJ2	HNRNPUL1	2	0.0340447	0.40942	-0.290385	0.346667	-0.522619	-0.467511	0.147071	-0.0573782	0.155451	-0.133684	0.00328458	-0.0945803	0.259468	-0.0144904	0.0275354	-0.344156	0.0267324	-0.122033	0.370127	-0.0182244	0.268838	-0.0639083	0.0923439	-0.012012
ENSG00000105373	Q9NZM5	NOP53	1	0.212933	0.882292	-0.715119	0.519238	-0.332765	-0.579123	0.226801	-0.0277488	0.426694	0.110794	0.138326	-0.272081	0.0914846	-0.340259	-0.0116836	-0.567782	0.591152	-0.378618	0.45922	-0.359987	-0.12219	-0.447219	0.506988	-0.0113462
ENSG00000105379	P38117	ETFB	9	0.0668536	0.0308841	0.873832	-0.147101	0.797489	0.101816	0.0268497	0.330317	-0.353681	-0.0759497	-0.193205	-0.190124	-0.168027	-0.326291	-0.950911	-0.601283	-0.305043	0.714347	0.186831	-0.029693	-0.396064	-0.105352	0.129314	0.584193
ENSG00000105402	P54920	NAPA	9	-0.286707	-0.703409	0.491526	-0.325474	0.198273	0.262836	-0.146223	0.755562	-0.00558418	0.543997	-0.567285	0.0259504	0.167608	0.779812	-0.535446	-0.0813754	-0.255173	0.0445779	-0.151618	0.138321	-0.420753	0.284704	-0.231625	0.0175056
ENSG00000105409	P13637	ATP1A3	9	-0.457756	-1.16613	-0.262285	0.010308	0.29688	-0.0618528	-0.30212	0.3313	0.263041	0.348101	0.5214	-0.0830303	0.156975	0.0854467	-0.0834352	-0.241918	0.0544546	0.285958	-0.226415	0.517585	-0.49525	0.0146406	0.271253	0.222852
ENSG00000105426	Q13332	PTPRS	6	-0.338121	-0.438476	0.205731	-0.368649	-0.20787	-0.0941848	-0.299133	0.893962	0.0685537	0.483443	-0.100873	0.159624	0.201368	0.61273	-0.471878	-0.528479	-0.180381	-0.378785	0.169765	-0.18404	0.460837	0.159698	0.19623	-0.0210705
ENSG00000105486	P18858	LIG1	1	0.120718	0.633381	-0.0907719	0.205283	0.108975	0.205774	0.0125841	0.0741152	-0.038308	-0.173547	-0.280177	-0.19923	-0.0424707	0.0608975	-0.0596789	0.00691632	-0.205813	-0.384362	0.00164918	0.197974	-0.046232	0.128674	-0.152509	-0.0838422
ENSG00000105514	O95716	RAB3D	9	-0.0958624	0.15698	-0.0353221	-0.307933	-0.403166	-0.209371	0.0648422	0.263009	0.183062	0.176176	0.00949134	-0.276004	0.218647	0.349114	0.18534	0.46753	-0.345529	-0.11153	0.114331	0.0335515	0.205163	-0.304408	-0.101336	-0.236776
ENSG00000105576	O14787	TNPO2	8	-0.475155	-0.592957	0.38804	-0.310385	0.149545	0.21954	-0.224976	0.422202	-0.181047	0.303489	-0.0328677	0.222488	-0.388627	0.238237	-0.164852	-0.0393105	-0.166806	0.110516	-0.244912	0.30006	-0.125493	0.504107	-0.247692	0.336856
ENSG00000105613	Q9Y2H9	MAST1	9	-0.11844	0.150336	0.052646	0.142995	0.265553	0.162935	0.067702	-0.0640285	-0.0739647	-0.0665757	0.188193	-0.050167	-0.172671	-0.0413612	-0.253298	-0.0705694	0.143862	0.196769	-0.12231	-0.00614025	-0.558307	-0.0118829	0.0456929	0.193031
ENSG00000105640	Q02543	RPL18A	3	0.399587	0.480638	-0.0406358	0.261397	0.240213	-0.232447	0.163945	0.0904937	-0.0295861	-0.0277142	0.145531	0.235944	0.084098	-0.209874	-0.241171	0.0543056	-0.0109918	-0.152131	-0.168337	-0.326925	-0.193984	-0.104424	-0.0973814	-0.320551
ENSG00000105655	Q9NPH2	ISYNA1	4	0.494113	0.96963	0.00933204	0.300203	0.893681	0.263316	0.623354	-0.222399	0.0104707	-0.264512	-0.276846	-0.0164499	0.183477	-0.281434	-0.0208279	-0.709834	-0.367328	-0.00332002	-0.273648	-0.325976	-0.177901	-0.230123	-0.460106	-0.116872
ENSG00000105662	Q6UUV9	CRTC1	8	-0.0388766	-0.427594	0.316004	-0.418777	0.584554	0.130316	-0.529547	0.585193	-0.0379349	0.0842341	-0.439287	0.357098	0.0828057	0.647704	-0.720283	-0.188299	-0.502263	-0.135964	-0.10442	0.072325	-0.0310217	0.376218	-0.0171576	0.354975
ENSG00000105671	Q9Y6V7	DDX49	5	0.119788	-0.383156	0.584692	-0.0387256	0.175898	0.0465635	0.180627	0.373872	-0.181278	0.259223	-0.241368	0.0188502	-0.256731	0.346874	-0.536708	-0.166384	0.155079	0.122262	-0.281976	-0.0885673	-0.203269	-0.123346	0.0692889	0.0484924
ENSG00000105701	Q14318	FKBP8	7	-0.385036	0.0228365	0.288214	0.0628431	0.0858323	0.113113	-0.0114382	0.646477	-0.0365025	0.588207	-0.625626	-0.0932236	-0.145453	0.457873	-0.272733	0.323731	-0.40571	0.0994791	-0.333321	-0.0643599	-0.124008	0.107551	-0.295321	-0.003426
ENSG00000105708	P17017	ZNF14	5	0.129489	-0.730508	-0.29668	-0.477298	-0.105971	-0.0352093	0.00184578	-0.00661799	0.124979	0.101502	0.19804	0.262155	0.0539443	0.166624	-0.169958	0.232368	0.0974655	0.226152	0.129391	0.121991	-0.159124	0.0330056	-0.0623857	0.1648
ENSG00000105723	P49840	GSK3A	9	-0.690817	-0.727553	0.209516	-0.549105	0.0758346	0.0937505	-0.0389973	0.385013	-0.147305	0.592937	-0.362447	0.22364	-0.259531	0.601807	-0.262429	0.28703	-0.31397	0.341968	-0.126537	0.400294	-0.264957	0.317476	-0.133307	0.347687
ENSG00000105767	Q8NFZ8	CADM4	6	-0.620772	-0.527868	0.377716	-0.29785	-0.330631	0.10083	0.0817913	0.521951	0.116368	0.720559	-0.231628	0.049813	-0.158034	0.549274	-0.219614	0.148857	-0.147323	0.377278	-0.323371	-0.0554542	-0.0759655	0.0533235	-0.18705	0.0778016
ENSG00000105778	Q8NBF6	AVL9	9	-0.321396	-0.177861	-0.089177	-0.0466329	-0.363023	-0.0481878	-0.0964486	0.0357277	-0.0234957	-0.0176081	0.142898	0.225511	0.0106498	0.465583	-0.238588	0.428236	0.126261	0.21401	0.00315437	0.126401	-0.214845	-0.13932	-0.191725	0.189877
ENSG00000105854	Q15165	PON2	1	-0.165679	0.312845	-0.862284	-0.298093	-0.532043	-0.537233	0.381345	0.0347146	0.156527	0.664913	-0.114272	0.819698	-0.131181	0.467005	0.214555	0.198907	0.0451189	-0.215694	0.312837	-0.230603	0.345372	-0.849952	-0.0632163	0.0464112
ENSG00000105855	P26012	ITGB8	1	0.0884537	-0.596763	-0.551921	-0.176939	-0.15685	-0.296997	0.787912	0.118154	0.702161	0.0194915	0.128664	-0.0219442	0.308957	-0.0492457	0.481186	-0.0176741	0.36029	0.0323012	0.308528	-0.0376924	-0.302891	-0.382963	-0.374719	-0.369498
ENSG00000105887	P58546	MTPN	9	-0.276673	-0.328611	0.169437	-0.3165	0.0346377	-0.124649	-0.402742	0.222584	-0.0259304	0.256184	-0.311513	0.367738	-0.0312122	0.348589	-0.258452	0.113391	-0.259549	0.144227	-0.117346	0.17255	0.0973764	0.272494	-0.0926356	0.346604
ENSG00000105894	P21246	PTN	2	0.065191	-0.110994	0.116695	0.0661936	0.312474	0.265117	0.163103	0.336966	0.492768	0.00346726	0.322318	-0.0669469	0.251288	0.102785	0.250926	-0.618718	-0.26087	-0.431926	0.0185031	-0.502777	0.203303	-0.387321	-0.194158	-0.397389
ENSG00000105928	O60443	GSDME	9	-0.148748	-0.443634	-0.149742	-0.525966	0.0895022	0.365107	0.104126	0.108207	0.436288	-0.00467593	0.0529404	-0.413993	-0.598977	0.298761	-0.0718799	-0.203575	0.307716	-0.0566447	0.0916437	0.295265	0.172848	-0.175283	0.466568	0.0041465
ENSG00000105953	Q02218	OGDH	9	0.0871934	-0.396518	0.353654	0.417834	-0.158543	0.240971	0.0530838	0.515169	-0.0202734	0.399765	-0.250603	0.00617304	-0.0176256	0.751716	-0.44442	-0.339493	-0.317815	-0.016364	-0.0296795	-0.231876	-0.260444	-0.146744	-0.154473	-0.040687
ENSG00000105963	O75689	ADAP1	9	-0.265757	-1.91151	0.697171	0.825125	1.00334	1.33246	-0.673545	0.537823	-0.389309	0.542411	-1.43441	0.481869	-0.716318	0.558281	-2.22122	-0.496631	0.102394	0.357342	0.307497	0.910019	-0.510228	0.333667	0.488145	0.141375
ENSG00000105993	O75190	DNAJB6	9	-0.400551	-0.0244688	0.0127152	-0.50492	0.171789	0.164188	-0.096533	0.560857	-0.0752953	0.285798	-0.165437	0.171505	-0.0637641	0.353108	0.0213789	-0.103533	-0.161653	0.249224	-0.0696661	-0.109996	-0.000227041	-0.163997	-0.064306	0.0137844
ENSG00000106028	Q04837	SSBP1	7	2.79e-06	-0.0500656	-0.0285625	0.190698	-0.2096	0.0794093	0.344865	0.194841	0.324107	0.136647	-0.408131	-0.151754	0.181168	-0.00186847	0.0164894	-0.227911	-0.424653	-0.0014207	0.0768764	-0.0886488	-0.0193018	-0.003653	0.111175	-0.0407089
ENSG00000106069	P52757	CHN2	7	0.17131	-0.174021	0.300223	0.200256	0.0952372	0.434174	-0.0217182	-0.213566	0.38838	0.179045	-0.0784319	0.0182545	-0.00990149	0.33165	-0.243384	-0.582478	-0.069773	-0.157485	-0.325765	0.279419	-0.204169	0.0393429	-0.202718	-0.153881
ENSG00000106070	Q13322	GRB10	1	0.140837	0.110135	0.233192	-0.0193869	0.0723738	0.086993	0.105618	-0.213039	0.27597	0.0310932	-0.0156152	0.305518	-0.145309	0.126315	-0.320338	0.143639	-0.118925	0.249446	-0.136328	-0.0704431	-0.114582	-0.396351	-0.218038	-0.112775
ENSG00000106080	Q9NWM8	FKBP14	2	-0.244482	0.200803	-0.543998	0.470384	-1.06749	0.00999206	0.749896	-0.934899	0.93928	-0.642565	0.0688949	-0.106106	0.583222	-0.912283	0.667485	-0.111076	0.206619	-0.194963	0.479146	-0.121039	0.64212	-0.116671	0.1311	-0.153363
ENSG00000106089	Q16623	STX1A	9	-0.594872	-0.234758	-0.190101	0.126807	0.465281	0.288117	-0.418485	-0.666537	0.10978	-0.494677	-0.0488411	-0.154222	0.250529	0.0612158	-0.18626	0.471084	0.471097	0.389754	-0.638548	0.883114	-0.533129	0.552472	-0.346922	0.438102
ENSG00000106144	P42575	CASP2	5	0.333059	0.179962	-0.107337	-0.196954	-0.112328	-0.38858	-0.231317	-0.095728	-0.0737848	0.113523	0.0595073	0.148581	0.231627	-0.00946849	-0.178374	0.121031	-0.105962	-0.175459	0.0920685	0.14851	0.174261	0.0649869	-0.159954	0.168131
ENSG00000106263	P55884	EIF3B	3	0.411192	0.288748	-0.091395	0.333611	-0.122802	-0.214626	0.329086	0.0544584	0.191685	-0.212923	-0.0599139	-0.180775	0.308696	-0.0240335	-0.0952915	-0.227477	-0.0276157	-0.162253	-0.03601	-0.238126	-0.0370992	-0.0954623	0.0711615	-0.162835
ENSG00000106278	P23471	PTPRZ1	3	-0.111442	0.206174	0.0574298	-0.0507578	-0.00418099	0.211109	0.198749	0.0347826	0.0664916	-0.0704815	-0.133591	-0.134375	0.221413	0.105463	0.00440044	-0.0414532	-0.167634	-0.179254	0.282123	-0.14557	0.187262	-0.133658	-0.316415	-0.0865875
ENSG00000106299	O00401	WASL	2	-0.139652	-0.168657	-0.312561	0.121829	-0.315763	-0.356358	0.184604	-0.0283623	0.357232	-0.0851739	0.395118	0.0569184	0.162877	-0.065082	0.0509364	-0.0489318	0.40977	-0.00938324	0.0655317	-0.0770277	0.0293926	-0.276555	0.0765352	-0.0272366
ENSG00000106344	Q9NW13	RBM28	5	0.00243509	0.403394	0.141546	0.0895953	-0.0502664	-0.144857	0.203337	-0.110345	-0.22832	0.152684	0.0190304	-0.0477769	0.0741119	-0.106263	-0.119525	-0.331193	-0.0839258	-0.135691	0.18904	0.0779672	0.0893104	-0.132999	0.0766115	-0.0279008
ENSG00000106399	P35244	RPA3	1	0.320621	0.787784	-0.48871	0.288754	-0.347428	0.032034	0.530137	0.279684	0.0963539	-0.301008	0.675163	-0.716581	0.327885	0.191292	0.694024	-0.273959	0.10812	-0.984508	0.158003	-1.0678	0.146535	-0.164986	0.449255	-0.74067
ENSG00000106415	Q86VQ1	GLCCI1	1	-0.0723949	-0.250464	0.353081	0.0760094	0.349007	0.0655997	0.0601411	0.18634	0.0798468	0.309384	-0.0484037	-0.170817	0.0609064	0.341371	-0.0726513	-0.300155	-0.127155	-0.102666	0.0734721	-0.35237	0.00312552	-0.15496	-0.0488913	-0.257355
ENSG00000106443	O94880	PHF14	9	0.0624651	0.0221465	0.027828	-0.155198	-0.0186409	-0.143085	0.169448	0.351492	-0.200117	0.239977	-0.115077	0.174599	0.0452303	0.370771	0.00990937	0.00633494	-0.0617625	-0.0809626	-0.27296	-0.113104	-0.112533	-0.0277341	-0.208785	0.0297568
ENSG00000106462	Q15910	EZH2	1	0.135914	0.0156726	0.138895	0.185005	-0.079471	0.196314	0.0049385	-0.208936	0.105968	-0.0476394	0.0017782	0.0456783	0.201247	0.281427	0.0964626	-0.00981631	-0.141222	-0.112285	0.0861316	-0.147505	0.0374857	-0.165394	-0.141771	-0.478878
ENSG00000106484	Q5EB52	MEST	4	0.533256	0.428631	0.168452	0.586462	0.0287688	-0.0803738	0.696846	-0.045129	0.217876	-0.740848	-0.289505	0.0606871	0.60046	0.504415	-0.00477747	-0.0875696	-0.355807	0.0879703	-0.124531	-0.473687	-0.261532	-0.285826	-0.303146	-0.861093
ENSG00000106524	Q8IV38	ANKMY2	7	-0.186256	-0.390942	-0.0830204	-0.426849	-0.00229078	-0.0870231	-0.203251	0.182997	-0.12463	0.281595	-0.169952	0.133578	-0.0840849	0.244289	-0.00249226	0.220669	0.112458	0.359785	-0.49441	-0.0196345	0.0830901	0.27368	-0.0547404	0.437435
ENSG00000106537	O95857	TSPAN13	9	0.757448	0.465316	0.502233	0.44554	-0.234154	0.0875092	-0.37785	0.264418	0.0821566	0.0986866	0.0520222	-0.031059	0.373553	0.376058	-0.174467	-0.176767	-0.0543068	0.0454216	-0.699656	-0.628755	-0.616593	-0.224852	-0.114178	-0.217724
ENSG00000106605	P53004	BLVRA	6	-0.0201635	-0.134816	0.0227165	-0.0297145	-0.249509	-0.33724	0.298954	0.372876	0.171008	0.321518	-0.172966	0.216385	0.0771006	0.31807	0.416778	0.126891	-0.502937	-0.0813834	-0.292117	-0.188061	0.275909	-0.0900427	-0.445423	-0.0738342
ENSG00000106628	P49005	POLD2	4	0.528333	0.51596	0.347893	0.64722	-0.0892237	-0.0114724	0.237209	0.5384	0.108955	0.345303	-0.393679	-0.0310239	0.972148	0.193186	0.0871329	0.214325	-0.637556	-0.720212	0.342066	-0.4593	-0.787113	-0.37857	-0.713794	-0.856188
ENSG00000106636	O15498	YKT6	9	-0.0898534	0.051956	0.237274	-0.239564	0.0198707	-0.000834021	0.0239711	0.207579	0.00650604	0.305329	-0.305238	-0.0589914	-0.0825401	0.332433	-0.0723188	0.0679808	-0.13165	-0.0140049	-0.0890137	0.0306938	0.0227411	0.102681	-0.265231	-0.0597765
ENSG00000106638	Q9Y4P3	TBL2	2	0.0522122	0.050358	-0.538481	-0.0226366	-0.0412049	-0.204208	-0.0447024	-0.538942	0.154127	-0.267683	0.37403	0.00787117	0.1472	-0.50699	0.236224	-0.0930196	0.696479	-0.0124251	-0.114089	0.137596	0.0123523	-0.277329	0.57353	0.219732
ENSG00000106665	Q9UDT6	CLIP2	8	-0.167392	-0.418819	0.250499	-0.15471	0.520607	0.165747	-0.620387	0.490853	-0.292012	0.551407	-0.0201187	0.188983	-0.342894	0.568536	-0.843784	-0.513012	-0.0849277	0.102021	-0.350471	-0.187277	-0.0629267	0.324264	0.345777	0.550038
ENSG00000106682	Q15056	EIF4H	3	0.27065	0.208377	0.211857	0.105178	-0.00605496	-0.291597	0.356161	-0.0174488	0.0410962	0.0585181	-0.143798	-0.15685	-0.00153991	0.249234	0.0082093	-0.583548	0.0510603	-0.197293	-0.0265527	-0.155608	0.141181	0.118241	0.0117288	-0.251203
ENSG00000106689	P50458	LHX2	1	-0.475186	0.349012	-0.72848	-0.0230323	-0.324093	-0.00772898	0.0531681	-0.084414	0.2528	0.0100995	0.390668	-0.0458519	0.00685391	-0.192171	0.288679	0.105721	0.502563	-0.0122625	-0.0810835	-0.0781687	0.0204192	-0.42509	0.467008	0.0305706
ENSG00000106701	Q9BXM9	FSD1L	9	-0.0849388	0.0295141	-0.12738	0.350421	-0.285157	-0.168236	-0.0085827	-0.156399	-0.099426	0.0115828	0.318553	0.394555	0.346695	-0.119932	0.181063	0.228046	-0.0109699	0.0483997	-0.258035	0.0265479	-0.40153	0.171326	-0.316385	-0.069733
ENSG00000106723	Q9Y657	SPIN1	8	-0.511405	-0.54787	-0.158864	-0.671922	-0.0370745	0.0793885	-0.187701	0.405084	-0.355031	0.414618	-0.184541	0.392496	-0.405227	0.292442	-0.341991	0.41549	-0.0487575	0.679751	-0.108533	0.332587	-0.274779	0.249975	-0.00341248	0.575276
ENSG00000106780	Q9H1U4	MEGF9	9	-0.194754	-0.206741	0.277693	-0.246291	0.383684	-0.00431708	-0.414489	0.362451	-0.116725	0.295832	0.0249406	0.0334625	-0.108111	0.193874	-0.24392	-0.275829	-0.164197	-0.00043846	0.0769285	-0.0575176	0.130987	0.0528679	0.103062	0.0975462
ENSG00000106853	Q14914	PTGR1	4	0.304227	0.763009	-0.0987696	0.230892	-0.357211	-0.288406	0.172959	0.288139	0.500922	0.133723	-0.0356139	-0.644237	0.72681	0.245885	0.395329	-0.163816	0.632844	-0.91901	-0.0226933	-0.780937	0.386872	-0.639862	0.525373	-1.35643
ENSG00000106976	Q05193	DNM1	9	-0.482397	-0.652079	0.204608	-1.0119	0.418421	0.413226	-0.660961	0.0588785	-0.628885	0.180523	-0.370142	0.720899	-0.656747	0.0180329	-0.352773	0.388569	-0.056889	0.810612	0.0222887	0.757976	-0.146405	0.472343	-0.055228	0.608025
ENSG00000106992	P00568	AK1	9	-0.238888	-0.95734	0.459076	-1.0691	0.064906	0.210525	0.475482	0.566952	0.286599	0.654443	0.0223055	0.041233	0.121619	0.882217	-0.654357	-0.318731	-0.210027	0.394398	-0.397288	-0.0371687	0.395815	-0.0465421	-0.600895	-0.0452356
ENSG00000107021	Q9NVG8	TBC1D13	4	-0.017111	-0.12537	0.297676	-9.51e-05	0.32804	-0.0938097	0.33307	0.230061	0.113462	-0.143798	-0.154422	-0.149695	0.134667	0.572818	-0.300563	-0.270838	0.156193	-0.0151708	-0.28755	-0.168341	-0.121083	-0.389304	0.0595295	0.0116333
ENSG00000107105	Q12926	ELAVL2	6	-0.304611	-0.922568	-0.454647	-0.29603	-0.197112	-0.278647	0.500081	-0.29255	0.386781	-0.157006	0.795367	-0.14422	0.510553	-0.129854	0.57032	-0.0700472	0.0499874	-0.259777	0.06321	0.192964	0.0636242	0.142055	0.142203	0.089923
ENSG00000107130	P62166	NCS1	9	-1.08613	0.398464	0.213923	0.344038	0.234869	0.513493	0.169377	0.125996	0.251974	0.271358	-0.226987	-0.123886	-0.032487	-0.150954	-0.0520099	0.374183	-0.659264	0.472909	-0.142475	0.18436	-0.446157	0.0137991	-0.850619	0.202223
ENSG00000107164	Q96I24	FUBP3	2	0.0183126	-0.0977962	-0.368832	-0.060902	-0.193722	-0.236515	0.153244	-0.242965	0.00100015	-0.275867	0.320454	-0.176246	0.127421	-0.194773	0.239989	-0.0570383	0.492318	0.00646339	0.224844	-0.320408	0.341504	-0.0746052	0.40935	-0.0352315
ENSG00000107186	O75970	MPDZ	1	0.27874	0.331994	0.157829	0.0707973	0.0484212	-0.0102482	0.240567	-0.610324	0.17228	-0.310849	-0.137094	-0.263988	0.0427317	-0.500674	0.061564	-0.117745	-0.0144141	0.0925845	0.283843	0.050608	0.189289	-0.235486	0.054274	0.1253
ENSG00000107263	Q13905	RAPGEF1	9	-0.686958	-0.391163	0.0719714	0.142487	-0.174666	-0.0431297	0.450135	0.14349	0.116285	0.31889	0.337968	-0.0295691	0.0410189	0.290835	0.0569206	-0.145091	-0.267896	0.00206827	0.145826	0.176537	-0.210354	-0.138979	-0.126016	-0.0806122
ENSG00000107282	Q02410	APBA1	9	0.0322625	0.301476	0.66578	-0.174619	0.521367	0.462348	0.448368	0.426942	-0.0168269	0.44702	0.24526	-0.118311	-0.29186	0.316474	-0.176111	-0.444299	-0.119585	-0.0219467	-0.571668	-0.299755	-0.626622	-0.365688	-0.419797	-0.220208
ENSG00000107290	Q7Z333	SETX	2	-0.083552	-0.164092	0.1825	-0.188346	0.097827	0.0882233	-0.175253	0.0231051	-0.372809	0.0306506	0.221855	0.339727	-0.210174	-0.0134829	-0.360804	-0.119476	0.11002	0.110586	-0.119603	0.0449202	0.119954	0.146594	0.168066	0.123563
ENSG00000107295	Q99962	SH3GL2	9	-0.41206	-0.705356	0.22418	-0.026759	0.689711	1.14345	0.0891016	0.310011	0.0358722	0.50663	-0.0301283	-0.445691	0.025827	0.496711	-0.304076	-0.337517	0.284535	-0.299683	-0.155175	-0.0630457	-0.0579466	-0.22819	-0.39124	-0.349165
ENSG00000107338	Q15464	SHB	9	-1.24358	-1.20008	-0.760509	-0.718793	-0.0983819	-0.290472	0.0626083	0.0119854	0.542249	0.0392747	0.591967	0.541004	-0.231001	0.119261	0.587036	0.401295	-0.0555262	0.0906796	0.408692	0.888993	-0.568531	0.0571105	0.384601	0.440121
ENSG00000107372	O76080	ZFAND5	5	-0.139007	-0.0980449	-0.327775	-0.340434	-0.0256213	-0.0416668	0.13186	-0.262227	0.0566654	-0.0881928	0.132767	0.177295	-0.0112521	-0.316987	0.0998693	0.360874	0.00328115	0.200781	0.00176136	0.142739	-0.103825	0.269743	-0.00487678	0.182273
ENSG00000107554	Q6XZF7	DNMBP	1	-0.36439	0.0360177	-0.281721	0.475609	-0.398456	-0.738246	0.941064	0.216469	-0.110993	0.216781	0.216436	-0.24634	0.0584646	-0.562129	-0.252808	-0.666895	0.258618	0.0583995	0.605737	0.428301	-0.234545	0.195652	0.724462	-0.575486
ENSG00000107566	O75477	ERLIN1	1	0.023138	0.643114	-0.402757	0.352409	0.0537923	-0.437781	0.442525	-0.378882	-0.0185003	-0.490742	-0.0267772	0.0496046	0.506136	0.356443	0.0607204	-0.206318	0.035349	-0.214385	-0.306004	-0.432035	0.525196	0.0684663	-0.0319491	-0.170763
ENSG00000107581	Q14152	EIF3A	3	0.15678	0.245527	-0.0577122	-0.0799206	-0.0275066	-0.254569	0.0693517	-0.0587357	-0.29603	0.0296171	0.0390128	0.056816	-0.0673226	0.119	-0.247301	-0.255336	0.379035	0.180462	0.0127223	-0.248578	0.100086	-0.207855	0.285237	0.127219
ENSG00000107625	Q9BQ39	DDX50	1	0.251749	0.172046	-0.273146	0.405271	-0.264161	-0.354832	0.0889012	-0.240271	0.103931	-0.253321	0.207393	0.0864983	0.26755	-0.0517505	-0.0783811	-0.121404	0.122157	-0.0513703	-0.062078	0.14016	-0.0886546	-0.106409	0.100634	-0.000509631
ENSG00000107643	P45983	MAPK8	8	-0.123503	-0.247271	0.767244	-0.796563	0.311122	0.504294	0.00439705	0.753835	-0.329952	1.09961	-0.694375	0.332225	-0.592525	0.434083	-0.260183	0.22093	-0.53295	0.33016	-0.582308	0.240673	-0.791131	0.0717325	-0.51564	0.396092
ENSG00000107672	Q9NXX6	NSMCE4A	1	0.214908	0.519346	-0.0123145	0.134828	-0.168722	-0.0292537	0.083757	-0.303663	-0.114526	0.151262	0.0421206	-0.127258	-0.0385691	0.174713	0.188725	0.22488	-0.0733454	-0.00838923	-0.125901	-0.39764	0.046535	-0.206363	-0.0745034	-0.100628
ENSG00000107719	Q9ULE6	PALD1	1	0.636543	0.540765	1.0249	0.882535	0.601133	-0.782866	0.305817	-0.313475	0.538752	-0.518811	-0.250579	-0.0163082	0.249245	-0.0207417	0.347171	-0.205251	-0.181647	-0.439743	-0.342644	-0.0902562	-0.17713	-0.877063	-0.54971	-0.360633
ENSG00000107789	Q9UNW1	MINPP1	4	0.0918571	0.486244	-0.00584987	0.200031	0.29151	-0.0842428	0.153884	0.0743378	-0.0446084	-0.250132	-0.133091	0.0831954	0.286648	0.0110774	0.0872344	-0.0251703	0.0139727	-0.407555	0.0690408	-0.241637	-0.0221415	-0.135794	-0.122728	-0.376083
ENSG00000107863	Q5T5U3	ARHGAP21	6	-0.0990297	-0.318923	0.0261279	0.0555557	0.0727862	0.0911213	0.0164935	0.142819	-0.184961	0.168358	-0.057992	-0.0143919	-0.0298267	0.0140444	-0.0278318	0.119313	-0.10173	0.0881505	0.0684817	-0.0054514	-0.0620434	0.0519315	0.00762769	-0.0206302
ENSG00000107897	Q5T8D3	ACBD5	2	-0.22499	0.023995	-0.0624816	-0.0918006	0.371218	0.0499834	0.0599243	0.191428	-0.0304226	-0.23503	0.498227	-0.415146	0.266182	-0.248626	0.322729	-0.630784	0.407243	-0.186357	0.360667	-0.391408	0.417087	-0.447795	0.284101	-0.287943
ENSG00000107937	Q9BZE4	GTPBP4	5	0.157483	-0.136411	0.097399	0.109946	-0.220121	-0.297657	-0.00522359	-0.209086	-0.000697345	-0.223931	-0.127969	-0.0376162	0.248567	0.0513529	-0.171566	0.121185	0.125307	0.15502	0.0322101	0.125825	-0.244078	0.15792	0.0865484	0.205593
ENSG00000107949	Q9P287	BCCIP	1	-0.0202963	0.198802	-0.436669	-0.0810616	0.0261748	-0.2961	-0.0156281	-0.0133192	0.054168	0.264623	-0.194366	0.260144	0.141553	0.0279292	-0.00710058	-0.0403541	-0.186637	0.0346573	-0.00512926	-0.0285483	0.202036	0.0178307	-0.000585347	0.0978789
ENSG00000107957	Q5TCZ1	SH3PXD2A	8	-0.520731	-0.476432	-0.4598	-0.389006	-0.325572	-0.599816	0.176587	0.188319	0.191079	0.222902	0.342436	-0.0697374	0.0833735	-0.00121554	0.352898	0.104556	0.0678452	0.0680957	0.155113	-0.00794238	0.302687	0.387186	0.152517	0.054659
ENSG00000108001	Q9H4W6	EBF3	7	0.0878419	-0.412823	0.305655	-0.235622	0.310487	0.3244	-0.361104	0.893067	-0.613732	-0.771413	0.158158	-0.61683	0.152116	0.836615	-0.857712	-0.0999881	-0.0124509	1.42171	-0.918212	0.579925	-0.423279	0.169564	-0.170593	0.254223
ENSG00000108010	O76003	GLRX3	4	0.315005	-0.0827582	0.0029535	0.0632551	0.187014	0.00989454	0.215508	0.187806	0.256936	0.314949	0.0180043	-0.37611	0.13973	0.346355	0.0230765	-0.394484	-0.229826	-0.104804	-0.00730692	-0.425183	0.021584	-0.198247	0.0583678	-0.341718
ENSG00000108021	Q5VWN6	TASOR2	2	-0.164132	-0.291126	-0.329078	-0.0260601	-0.275839	-0.231534	0.0785573	-0.122755	0.0251844	-0.011771	0.0892708	0.135347	0.0559291	-0.299172	-0.00303576	0.147152	0.233983	0.0829257	0.114702	0.269348	-0.0931068	0.0378138	0.282943	0.294454
ENSG00000108055	Q9UQE7	SMC3	2	0.216323	0.0041878	-0.210794	0.0240755	-0.0600696	-0.187624	0.0275709	-0.373472	0.0538634	-0.454824	0.134121	0.0645196	0.0595085	-0.374074	0.144695	-0.0340468	0.154487	0.0279859	0.239354	-0.0358316	0.235654	0.0905778	0.0711785	0.182634
ENSG00000108061	Q9UQ13	SHOC2	9	-0.414072	-0.655239	0.474362	-0.191474	0.176655	0.158475	0.0464308	0.120211	-0.0454003	0.153967	0.022249	0.116679	0.0168402	0.455555	-0.541142	0.13923	-0.279347	-0.0608381	0.321232	0.166676	-0.0557643	-0.0458419	-0.233579	0.154137
ENSG00000108091	Q16204	CCDC6	5	-0.0822406	-0.0739496	0.0867364	0.0350328	-0.0416069	0.00143136	-0.0578643	0.0431832	0.10185	-0.0574725	0.364999	0.19094	0.0189839	-0.0265706	-0.0456134	-0.0336287	0.265729	-0.0471966	-0.103672	-0.11177	-0.273878	-0.16658	0.0188788	-0.00572122
ENSG00000108094	Q13617	CUL2	9	0.0711017	-0.3328	0.461824	-0.0308897	0.218862	0.306704	0.00226726	0.187611	-0.0270884	0.281417	-0.0289744	0.0162331	-0.0906336	0.371115	-0.175454	-0.0234351	-0.0697103	-0.3144	-0.0408763	0.104989	-0.301245	-0.263655	-0.268001	-0.0549632
ENSG00000108106	Q16763	UBE2S	1	-0.223577	0.302413	-0.512734	-0.133562	-0.0835983	0.0416915	0.228924	0.0624611	0.169726	-0.035874	0.106495	-0.286546	0.0560537	0.0811414	0.630005	-0.121985	0.120168	-0.236878	0.455574	-0.492289	0.449613	-0.463275	0.170932	-0.28488
ENSG00000108179	P30405	PPIF	3	0.633232	0.0922167	0.0399261	0.467198	-0.345552	-0.248415	0.443397	-0.0909478	0.305512	-0.184774	-0.0459356	-0.240028	0.124703	-0.0526407	0.0753716	0.0230701	-0.00646878	0.0933915	-0.338814	-0.527105	0.0649922	-0.23864	0.00085369	-0.0445423
ENSG00000108219	Q8NG11	TSPAN14	8	-0.248766	-0.0802371	-0.153434	-0.197169	-0.216113	-0.530252	0.106332	0.429655	-0.114736	0.19509	-0.0254443	0.0800948	0.153163	0.406396	-0.733766	0.605644	-0.284219	0.289175	-0.427839	0.233595	0.0834543	0.285937	-0.044006	0.187446
ENSG00000108262	Q9Y2X7	GIT1	9	-0.0570903	-0.0924422	0.422181	-0.00768868	0.125092	0.269773	0.117624	0.365087	-0.0900487	0.188755	-0.374876	0.013974	-0.17031	-0.00209728	-0.466643	-0.0412557	-0.287963	0.473066	-0.293728	0.28248	-0.307442	-0.181526	-0.189214	0.304293
ENSG00000108309	Q59EK9	RUNDC3A	9	-0.475051	0.140652	0.302243	0.565383	0.196466	0.0989695	0.263595	-0.125889	-0.255254	0.0503643	-0.429294	0.0310324	-0.136796	0.336495	-0.0291034	-0.454231	0.226105	0.358536	-0.300769	-0.0463376	-0.252016	0.0538781	-0.143758	0.0247795
ENSG00000108349	O15234	CASC3	5	-0.269133	-0.102757	-0.32308	-0.139974	-0.152683	-0.378308	0.142074	0.032884	-0.0386897	0.0738328	0.00905994	0.0161708	0.0830459	0.197219	-0.195517	0.000114303	0.0123216	-0.138796	0.0494179	0.216593	0.0958735	0.532938	-0.00977472	0.287166
ENSG00000108387	O43236	SEPTIN4	9	0.106041	0.325145	-0.0742371	-0.828742	-0.144832	0.641199	-0.5615	0.184066	0.238353	-0.333955	-0.135923	0.217806	-0.684025	0.122662	-0.362828	0.343623	-0.0524661	-0.0525598	0.484287	0.0335914	-0.111935	0.0724045	0.234488	0.339337
ENSG00000108406	Q8IX18	DHX40	1	0.218464	-0.0838362	0.568455	0.275828	0.231429	-0.284846	0.0841407	0.0551948	0.0934391	-0.226943	0.132155	-0.000165519	0.00362481	-0.00199265	0.073406	-0.0188158	-0.19318	-0.246565	-0.354474	-0.103803	0.101746	-0.291935	0.182151	-0.213476
ENSG00000108424	Q14974	KPNB1	1	0.263402	0.190477	-0.0159941	0.249891	-0.0280571	-0.322431	0.535387	-0.355375	0.126291	-0.330894	-0.0112088	-0.0714887	0.124596	-0.158476	-0.0996585	-0.270906	0.0663397	-0.208503	0.266589	-0.074898	0.190745	0.138289	-0.121437	-0.0826799
ENSG00000108443	P23443	RPS6KB1	6	-0.102511	0.0356004	0.0281113	-0.255972	-0.115677	0.126652	0.0799982	-0.326466	-0.261484	0.306195	0.293879	0.333073	-0.039489	-0.117558	-0.29403	0.0276902	-0.00142581	0.137878	-0.0038298	-0.297274	-0.0412586	0.154324	0.148893	0.184681
ENSG00000108465	Q96JB5	CDK5RAP3	5	-0.0854311	0.0667801	-0.0327586	-0.501547	0.0211715	-0.00264983	-0.179504	-0.127971	-0.164719	0.0573551	0.141246	0.287869	-0.12482	-0.215321	-0.000689257	0.216459	-0.0367095	0.163682	-0.100333	0.00351157	0.178961	0.23665	0.0198192	0.17895
ENSG00000108518	P07737	PFN1	1	0.145627	0.887302	0.137155	0.283623	-0.389976	-0.0763681	0.13053	0.149546	0.221002	-0.124268	-0.317142	-0.153468	0.500855	0.295082	0.3614	-0.225545	-0.442563	-0.318992	-0.0991631	-0.0972066	0.167295	-0.204189	-0.309872	-0.520665
ENSG00000108561	Q07021	C1QBP	7	0.161062	-0.163541	0.38511	0.049664	-0.16853	-0.140073	-0.0503503	0.259173	-0.19939	0.245229	-0.394773	-0.145052	-0.104969	0.48105	-0.29508	-0.1953	0.0192754	0.157812	-0.0740514	-0.147146	0.0480871	-0.0153356	0.0103525	0.276776
ENSG00000108582	O75976	CPD	7	0.630957	0.733372	0.243956	0.779217	0.108903	0.128768	0.16168	0.434839	-0.0092771	0.198435	0.0791054	-0.258277	0.654823	0.173441	-0.671534	-0.471562	-0.222873	-0.810914	-0.128259	-0.266719	-0.2578	-0.225098	-0.324514	-0.680668
ENSG00000108588	Q96A33	CCDC47	1	0.152624	0.0821171	-0.295782	0.314725	-0.600434	-0.396456	0.333794	-0.123215	0.206115	-0.0753876	0.220665	-0.158262	0.373114	-0.100606	0.134154	-0.296943	0.317959	-0.0667003	0.222609	-0.175603	0.231308	-0.371768	0.194005	-0.122035
ENSG00000108592	Q8IY81	FTSJ3	5	0.0142189	0.18706	-0.0659256	0.311359	-0.214063	-0.512659	0.282441	0.187137	-0.016464	-0.178767	-0.167791	-0.00452262	0.247324	-0.114902	0.215628	-0.126863	-0.107336	0.0193624	-0.0995371	0.19163	-0.0876884	0.25644	-0.158529	-0.057552
ENSG00000108679	Q08380	LGALS3BP	1	-0.150047	0.253143	1.05021	-0.0265379	-0.109284	0.428534	-0.0787527	-0.855553	0.126407	-0.881921	-0.181751	-0.669222	-0.0839166	0.0912298	0.37767	0.0497634	-0.299753	0.734029	-0.346811	0.159431	0.564748	0.0780445	-0.2155	-0.0141564
ENSG00000108773	Q92830	KAT2A	3	0.286108	0.534581	-0.0373954	-0.0634484	0.14804	-0.26115	-0.0485185	-0.0722855	0.0870791	-0.0278361	0.127391	-0.179789	0.0802437	0.0121122	0.253316	-0.217053	0.0788637	-0.0109494	-0.413465	-0.172603	0.0595557	-0.301184	0.18495	-0.0465637
ENSG00000108819	Q96SB3	PPP1R9B	8	-0.286412	-0.165696	0.768258	-0.446337	0.0521479	-0.0147333	-0.150931	0.116673	-0.0154845	-0.145711	0.158837	-0.0508925	-0.259145	0.176774	-0.179399	-0.140309	0.102212	0.170594	-0.0997192	0.0183547	0.181166	0.516803	-0.131404	-0.175647
ENSG00000108852	Q14168	MPP2	7	-0.194808	0.0439466	0.305599	0.500399	-0.112556	0.068922	0.203525	0.330469	-0.198305	0.299743	0.00813118	-0.345823	0.487252	0.150735	0.0840527	-0.390402	-0.00734326	0.0884704	-0.209189	0.0868025	-0.603032	-0.180841	-0.108058	-0.30769
ENSG00000108861	P51452	DUSP3	7	-0.0302551	0.0600298	0.135538	0.230738	0.00320767	-0.219266	-0.398641	0.537551	-0.0591482	0.428082	-0.365531	0.345727	0.54754	0.581395	-0.142592	0.294761	-0.00315809	0.0293338	-0.552895	-0.154772	-0.496857	-0.377079	-0.242924	-0.150785
ENSG00000108946	P10644	PRKAR1A	4	-3.22e-05	-0.316701	0.493049	-0.0103764	0.498931	0.357222	-0.120322	-0.00425929	-0.0571935	0.0642154	-0.183682	0.224811	-0.103874	0.10548	-0.189786	-0.0805054	0.116424	-0.120655	-0.206787	-0.0927801	-0.149954	-0.0187516	-0.158773	-0.0456999
ENSG00000108984	P52564	MAP2K6	3	-0.219449	-0.174465	0.382936	0.270625	0.291232	0.184273	-0.442619	0.167088	-0.0676542	0.0751639	0.398705	0.115698	-0.196716	0.156542	-0.566532	0.0825829	0.487513	-0.1967	-0.372636	-0.320451	-0.322101	0.0350636	0.179169	0.0527325
ENSG00000109062	O14745	SLC9A3R1	1	0.609008	-0.407874	0.70338	1.15858	-0.0906025	0.380815	0.334846	-0.497035	-0.195923	-1.03684	-0.194806	1.44201	0.658308	-1.63666	-0.536993	-0.655425	0.0636262	0.111893	-0.136251	-0.762981	0.622835	0.101114	0.0866076	-0.121642
ENSG00000109089	Q86X02	CDR2L	8	-0.421049	-0.309077	-0.685025	-0.225966	-0.300893	0.230562	-0.13031	0.0708793	0.0965255	0.0267703	-0.119714	0.28743	-0.100256	-0.211094	0.0618822	0.415052	-0.0918134	0.348858	0.208185	0.404503	-0.144786	0.207592	0.106574	0.275169
ENSG00000109113	Q9BZG1	RAB34	2	0.332564	0.338154	-0.172169	0.198463	0.0194823	-0.161363	0.209173	-0.774577	0.11789	-0.209929	0.285444	0.128705	0.0907254	0.316106	-0.0237604	-0.15225	0.238405	-0.257247	0.0983729	-0.119953	0.232028	-0.472049	-0.0157815	-0.246437
ENSG00000109180	Q9NX40	OCIAD1	9	-0.188453	-0.294344	0.320299	-0.288732	0.415695	0.232379	-0.0560191	0.380892	-0.104783	0.424285	-0.198978	-0.0289573	-0.111931	0.355028	-0.238397	0.0634514	-0.233464	0.0277146	-0.430006	-0.00416858	-0.256934	0.0447947	-0.0311452	0.201776
ENSG00000109184	Q92564	DCUN1D4	8	0.0715877	0.12229	-0.0533307	-0.175621	-0.0915206	-0.0276308	-0.320534	-0.428895	-0.195577	0.323095	0.372089	0.118985	0.181801	-0.20824	-0.0404906	0.204928	0.276355	-0.0150378	-0.0749638	-0.0259751	0.0074404	0.151241	-0.0980727	-0.073924
ENSG00000109265	Q6ZU35	CRACD	8	-0.822387	-0.618465	-0.193243	0.153149	-0.0290081	-0.0599344	-0.531029	0.00618353	0.00560778	0.0525959	0.525605	0.633288	-0.379584	0.01533	-0.23629	-0.228148	-0.0168955	0.153517	0.172274	0.434332	0.0116864	0.188866	0.395574	0.366976
ENSG00000109381	Q15723	ELF2	5	0.112363	-0.281992	-0.00512525	0.0142045	0.0114642	-0.0141875	-0.0616538	0.00977786	-0.0556006	0.193585	-0.113123	-0.187418	-0.168445	0.134001	-0.0502664	0.413964	-0.0965934	-0.0101654	0.0695252	-0.107844	-0.0128247	0.18975	-0.0592808	0.0758841
ENSG00000109458	Q13480	GAB1	1	-0.203634	-0.503282	-0.417507	-0.182858	-0.306581	-0.470559	0.160277	0.412878	0.0959815	0.199835	-0.184976	-0.375022	0.507689	0.622461	0.0602251	0.152985	0.119976	-0.462356	0.708327	0.179377	0.226661	-0.397901	0.186816	-0.128812
ENSG00000109472	P16870	CPE	9	-0.128304	-0.128778	0.27086	0.166044	0.516252	0.0571418	-0.294705	0.64749	0.0147763	0.737536	-0.0350385	-0.280518	-0.184849	0.587838	-0.184711	-0.149192	-0.171528	-0.176056	-0.179032	-0.224551	-0.378575	-0.315313	-0.052218	-0.114572
ENSG00000109519	Q9HAV7	GRPEL1	6	-0.220622	-0.157328	0.155028	-0.297121	-0.158245	0.0200518	-0.0914468	-0.315398	-0.0684861	0.110981	0.0296112	0.163781	-0.0385609	0.133553	-0.169621	0.368987	-0.267483	0.138472	-0.116157	0.300517	-0.083368	0.336296	-0.0621667	0.288726
ENSG00000109586	Q86SF2	GALNT7	1	-0.0280149	-0.124001	-0.0504713	0.176508	-0.249674	0.172308	0.355303	-0.14751	0.352756	0.0483247	0.0598044	-0.27153	0.087041	0.187902	0.0892321	0.235689	0.142692	-0.103458	-0.295182	-0.583568	-0.391843	-0.0347476	0.257866	0.114574
ENSG00000109606	O43143	DHX15	4	0.389889	0.174132	-0.307941	0.308917	-0.224941	-0.264449	0.392529	-0.160731	0.311882	-0.247803	0.0166512	-0.236249	0.409697	-0.103069	0.166929	-0.0960224	-0.0626305	-0.288005	0.247139	-0.144589	0.312795	-0.132718	-0.106069	-0.355346
ENSG00000109654	Q9C040	TRIM2	8	-0.191538	-0.341261	0.224073	-0.235584	-0.0121725	0.0637267	-0.586376	0.205962	-0.398969	-0.153732	0.185696	0.353503	-0.321909	0.183234	-0.370965	-0.0654879	-0.141627	0.146236	-0.0561942	0.333984	0.213911	0.519017	0.0888329	0.35764
ENSG00000109685	O96028	NSD2	1	0.515744	0.878138	-0.520896	0.688953	-0.614088	-0.510537	0.326129	-0.301768	0.259822	-0.440641	0.257863	-0.310773	0.438661	-0.433741	0.0708077	-0.47011	0.478478	-0.545822	0.46444	-0.244434	0.583808	-0.302578	0.328128	-0.595583
ENSG00000109736	Q14728	MFSD10	5	0.264893	0.0886957	-0.247152	0.0398761	0.102474	-0.0531558	-0.0507376	-0.122856	-0.0346125	0.0409192	0.139561	0.0649408	-0.196547	-0.09991	0.336267	0.0292512	-0.0139445	0.0160541	-0.532774	-0.104224	0.123212	0.239767	-0.00241339	-0.0275823
ENSG00000109756	Q9Y4G8	RAPGEF2	9	0.0256065	-0.225006	0.333508	-0.0274551	-0.266306	0.0527807	-0.0894678	-0.0734677	0.0361426	0.0528348	-0.265244	0.144355	0.115985	0.30365	0.0317397	0.177906	-0.111576	0.331464	-0.14896	0.259763	-0.36891	-0.0300521	-0.355214	0.0959235
ENSG00000109775	Q9NUQ7	UFSP2	1	0.337079	0.661314	-0.0939994	0.388009	-0.328106	-0.502076	0.275394	-0.0211106	0.210683	-0.1736	0.228423	-0.236228	0.339349	-0.127572	0.180327	-0.411678	0.121252	-0.10675	-0.00982748	-0.606418	0.110186	-0.126046	0.0551731	-0.16378
ENSG00000109805	Q9BPX3	NCAPG	1	0.65535	0.793339	-0.310991	0.4897	-0.320426	0.0170847	0.334563	-1.18688	0.249993	-0.656761	0.180018	0.275047	0.571612	-0.989226	0.378744	0.0669255	0.291582	0.0690734	-0.0225003	0.162275	0.12031	-0.338239	-0.21763	-0.612965
ENSG00000109814	O60701	UGDH	1	0.339138	0.426832	-0.693347	0.628311	0.206646	-0.941752	0.337839	-1.00054	0.294547	-0.197914	0.198107	0.412036	0.0526189	-0.0237767	0.320614	0.111722	-0.0408946	-0.4433	0.257071	-0.42511	0.462308	-0.502332	0.448647	-0.227468
ENSG00000109906	Q05516	ZBTB16	4	-0.559283	-0.580135	0.213154	0.36534	0.631748	0.475883	-0.614835	0.911404	-0.072578	0.146204	0.734059	0.327261	0.155563	0.330748	-0.692375	-0.971174	0.630012	0.0387237	0.634631	-0.158395	-0.486719	-0.0648323	-0.781095	-0.613307
ENSG00000109911	Q96EB1	ELP4	1	0.700811	0.536118	0.0763998	0.711409	0.610607	0.258422	0.144673	0.290353	0.304101	0.094177	-0.472588	-0.728509	0.329373	0.832722	-0.349814	-0.549492	-0.146341	-0.535935	-0.235559	-1.08141	-0.40303	-0.654806	-0.00347036	0.27179
ENSG00000109919	Q9Y6C9	MTCH2	7	0.0400632	-0.180662	0.416441	0.0595676	0.192328	0.229705	-0.186118	0.614598	0.151432	0.812384	-0.37795	-0.185569	0.191737	1.259	-0.42036	0.131062	-0.646898	-0.201919	-0.409483	-0.447087	-0.535184	0.0956059	-0.500089	-0.102601
ENSG00000109929	O75845	SC5D	7	-0.0353547	-0.254073	0.847691	-0.67206	0.238437	0.297559	-0.527544	0.716409	0.0459285	0.896478	-0.543956	0.189975	-0.0166396	1.06178	-0.192286	-0.275774	-0.15402	-0.0745118	-0.619752	-0.125768	-0.490961	-0.157768	-0.131321	-0.0224672
ENSG00000110002	O00534	VWA5A	4	-0.0275563	0.0439061	-0.149865	0.364266	0.159245	0.0828777	0.35738	0.106612	0.425616	-0.103462	-0.0810555	0.102674	0.503611	-0.319096	-0.581857	0.0997355	0.257422	0.101887	-0.129023	-0.39122	-1.11533	-0.105883	0.24385	0.155266
ENSG00000110013	Q9HAT2	SIAE	8	-0.37002	-0.592663	0.128054	-0.251712	0.200969	0.401849	0.0547383	-0.270906	-0.296052	-0.257574	-0.100109	0.181885	-0.27041	0.109087	0.0378188	0.100225	0.265813	0.189167	0.0739218	0.421493	-0.248667	0.17359	0.312583	0.00691886
ENSG00000110025	Q9NRS6	SNX15	8	0.0465954	-0.850371	0.229102	-0.224852	0.0542977	-0.108326	-0.00313532	0.347962	0.197785	0.554188	-0.308376	-0.0268141	0.0470855	0.412831	-0.423879	0.070705	0.107587	0.455217	-0.0398691	0.109185	0.109393	0.0334997	-0.55861	-0.2312
ENSG00000110048	P22059	OSBP	6	0.0391674	-0.500534	0.0508159	0.106591	-0.115659	-0.181756	-0.138293	-0.225903	0.000422896	-0.0967846	0.237224	-0.0848137	0.296108	0.0254807	-0.0182899	-0.269819	0.386097	-0.0142213	-0.0459845	-0.0748418	0.0945469	0.194099	0.323931	0.0124142
ENSG00000110074	Q96CU9	FOXRED1	8	0.025351	0.085458	-0.231031	0.162206	0.110138	0.0188034	-0.155282	-0.131182	-0.275961	0.113834	-0.118361	-0.00927276	0.0510247	0.0913684	-0.12234	-0.297788	0.103247	0.192639	0.0256359	-0.0379867	-0.148873	0.199961	0.290702	0.0577095
ENSG00000110075	Q5H9R7	PPP6R3	1	0.358451	0.355718	-0.0682067	0.45582	-0.0565178	-0.143346	0.360715	-0.157972	0.359484	-0.399171	0.346113	-0.229357	0.419964	-0.120564	0.236353	-0.420654	0.342571	-0.6346	0.226921	-0.419395	0.158559	-0.554076	0.156198	-0.573009
ENSG00000110076	Q9P2S2	NRXN2	9	-0.455765	0.0124249	-0.235273	0.0498531	-0.128456	0.0297203	-0.0256648	0.129503	-0.179086	0.225404	-0.245156	-0.080853	-0.0121307	-0.139656	0.346393	0.366888	0.0651078	0.434091	-0.194525	0.028636	-0.28955	0.188939	0.0220998	0.0870556
ENSG00000110171	O75382	TRIM3	8	-0.27718	0.131252	-0.0267837	0.0239558	0.315765	0.298768	-0.186587	-0.169557	-0.42804	0.0437417	0.206344	-0.0598103	-0.590075	-0.362698	0.356676	-0.0840183	0.311787	0.123189	-0.0782434	0.0893366	0.0442711	0.314836	-0.153408	0.156477
ENSG00000110218	Q96RD7	PANX1	9	-0.162378	-0.398307	0.380518	-0.124173	-0.0397742	0.114553	-0.271623	0.414666	-0.17962	0.280906	-0.192636	0.465007	-0.0759973	0.398625	-0.407103	0.12917	-0.220985	0.177082	-0.271687	0.12881	-0.155692	0.118575	-0.360828	0.252892
ENSG00000110321	P78344	EIF4G2	8	-0.310536	-0.555929	0.285618	-0.359011	0.132109	0.184823	-0.202443	0.186614	-0.161777	0.112004	-0.0549387	0.246972	-0.20847	0.220656	-0.221358	0.14177	-0.0533077	0.121401	-0.0462047	0.12605	-0.0186305	0.244084	0.0517786	0.138726
ENSG00000110344	Q14139	UBE4A	2	-0.259306	-0.165021	0.0403989	-0.20148	-0.0740796	-0.0492804	-0.0324958	0.169256	0.0778859	0.107718	-0.161886	0.214041	-0.2395	0.00148136	-0.0360187	0.127476	-0.0684267	0.113123	0.0567394	0.119929	0.0423504	0.0121528	0.103881	0.101062
ENSG00000110367	P26196	DDX6	8	-0.295779	-0.432753	-0.0393242	-0.30325	-0.252795	-0.183908	0.0910627	0.247426	0.0901379	0.234597	-0.102189	0.306769	0.0660891	0.271832	-0.142503	0.219143	-0.224355	0.0481303	0.0398218	0.0684449	0.0102	0.327717	-0.243764	0.199252
ENSG00000110400	Q15223	NECTIN1	7	0.0621079	-0.478204	0.113783	-0.206314	0.398849	0.241286	-0.701254	0.335033	-0.359028	0.762486	-0.672404	0.293028	-0.19673	0.0823759	-0.196181	0.523263	0.24145	0.178617	-0.0166497	0.00199439	-0.921698	0.269084	-0.104558	0.349663
ENSG00000110429	Q9UK99	FBXO3	7	0.135692	-0.0551922	0.295863	-0.358737	0.44598	0.191676	0.164356	-0.129393	-0.181491	0.106301	-0.138915	-0.169698	0.0441205	0.284216	0.0547747	0.0902004	-0.289075	0.0936782	-0.367449	0.0655794	0.0425937	0.250697	-0.358684	-0.217094
ENSG00000110435	O00330	PDHX	9	-0.497582	0.0409259	-0.604585	-0.00382372	0.0870947	0.169626	-0.0390507	0.26251	-0.180616	0.407318	0.0819277	-0.144208	-0.20262	0.319921	0.551102	-0.589023	0.203891	0.00656336	-0.193531	-0.170361	0.301147	-0.109918	0.0570995	0.246192
ENSG00000110436	P43004	SLC1A2	8	-0.461059	-0.930859	1.08755	-0.501756	0.231053	0.488926	-0.288273	1.07513	-0.337169	0.599144	-0.185767	0.888611	-0.110026	0.807912	-0.380727	-0.0528184	-0.403972	0.110706	-0.0396239	-0.367321	-0.439075	-0.512825	-0.420306	0.142547
ENSG00000110492	P21741	MDK	2	0.89083	1.35296	-0.301862	0.399526	-0.871358	-0.0337778	0.040032	0.0202527	-0.00617071	-1.3771	0.050446	-0.983563	0.722014	0.682962	0.617598	-0.123947	-0.199675	-1.04072	0.609072	0.35665	0.240421	-0.470685	-0.16587	-0.408039
ENSG00000110514	Q8WXG6	MADD	9	-0.279988	0.120957	0.245514	0.14613	0.356037	0.440717	-0.2267	0.242723	0.0538188	0.221174	0.0828649	-0.0430178	-0.0488943	-0.0469891	-0.076842	-0.11006	-0.0316695	-0.167153	-0.181889	-0.215131	-0.215965	-0.116212	-0.0233051	-0.126119
ENSG00000110651	P60033	CD81	3	0.0131766	-0.0901189	0.012822	0.202225	-0.136944	-0.038292	0.378085	0.403162	0.366925	0.366989	-0.194026	-0.347111	0.321094	0.321861	0.258806	0.022225	-0.264086	-0.109024	-0.0917366	-0.275815	-0.0850495	-0.385247	-0.408745	-0.241177
ENSG00000110693	P35712	SOX6	1	-0.135564	-0.239207	0.852061	0.179668	-0.0876391	0.493476	0.0344937	-0.663219	-0.39571	1.12448	0.382209	-0.168189	0.240148	0.956892	-0.203877	-1.33664	0.0725524	-0.559555	0.325403	-0.803005	-0.00560285	-0.196825	0.36269	-0.22903
ENSG00000110768	P32780	GTF2H1	6	0.0145473	-0.175102	0.127164	-0.294577	-0.0632086	-0.212716	-0.172247	0.19219	-0.121555	0.165623	-0.0457642	0.322525	-0.0959374	0.0381621	0.183321	0.388924	0.0717606	0.27103	-0.384676	-0.0327667	-0.245088	0.00220066	-0.0989073	0.165097
ENSG00000110844	Q6NWY9	PRPF40B	9	-0.668241	-0.551503	-0.174339	-0.24657	0.350816	-0.00982816	-0.288823	0.176126	-0.347	0.442494	-0.178009	0.264266	-0.315406	-0.0750884	-0.217625	0.427519	-0.105029	0.305191	-0.166186	0.107825	0.247972	0.708772	-0.0757327	0.388401
ENSG00000110880	Q9ULV4	CORO1C	6	-0.10344	-0.450775	0.497135	-0.143056	0.0136539	-0.0397429	0.176383	0.0337201	0.0448809	0.193933	0.362346	-0.136654	0.247025	0.483072	0.255303	-0.206475	0.0339571	-0.143388	0.0282047	-0.395116	0.135845	-0.417348	-0.0293919	-0.440073
ENSG00000110921	Q03426	MVK	4	-0.35784	0.821718	-0.185616	0.0692583	-0.395292	-0.0514234	-0.133353	0.29717	0.214849	0.181323	-0.141651	-0.190232	0.0909204	0.446991	-0.0942328	0.445333	-0.737351	-0.0853618	-0.00621092	0.409111	-0.350787	-0.409633	0.101872	0.0604361
ENSG00000110931	Q96RR4	CAMKK2	9	0.0134698	-0.250165	-0.0119899	0.523414	0.0476054	0.152441	-0.279598	0.0683278	-0.0423146	-0.167833	-0.0964953	-0.119016	-0.114328	0.166588	-0.271496	0.150569	-0.74695	0.189611	0.111214	0.449358	0.00164588	-0.106304	0.160561	0.171685
ENSG00000110987	Q4VC05	BCL7A	7	-0.235506	-0.306209	-0.169601	-0.23898	-0.0142758	-0.0307643	-0.291458	0.287767	-0.0560045	0.453595	-0.113299	0.455523	-0.162423	0.451353	-0.435119	0.0561731	-0.0455759	0.365159	-0.334855	-0.0517919	-0.236166	0.143067	0.181799	0.327591
ENSG00000111052	O14910	LIN7A	7	0.178198	0.166707	0.380248	0.245166	0.624479	0.512842	-0.402642	0.0298342	0.194203	0.109477	0.252427	-0.274288	-0.350916	0.211468	0.0204364	-0.703624	-0.0389934	-0.378246	-0.585586	-0.370476	0.130055	-0.0348596	-0.0625149	0.146608
ENSG00000111144	P09960	LTA4H	1	0.775491	0.851921	-0.519292	0.772126	-0.600913	-0.348739	0.400507	-0.00789626	0.657943	-0.00910734	-0.350971	-0.697826	0.852784	-0.135804	0.360038	0.0369841	-0.482655	-0.358649	-0.247985	-0.170502	-0.0627905	-0.220545	-0.22386	-0.270262
ENSG00000111229	O15145	ARPC3	9	0.0894106	-0.0517777	0.140429	0.0350202	-0.0881138	0.0890847	0.14409	0.520329	0.252166	0.527387	-0.482065	-0.261601	0.173542	0.493612	0.0456052	0.178983	-0.478925	-0.00170509	-0.284953	-0.240258	-0.105095	-0.0141159	-0.449456	-0.231593
ENSG00000111237	Q9UBQ0	VPS29	9	-0.228914	-0.0540526	0.0448869	-0.213779	0.00253067	-0.0421075	0.106189	-0.0918436	-0.254962	0.0852684	0.0133986	-0.163077	0.0909458	0.107827	-0.145303	0.216769	-0.0365307	0.108411	-0.0847314	0.0911518	0.00942371	0.189371	0.0103189	0.23881
ENSG00000111249	O14529	CUX2	6	-0.162775	-0.561818	-0.0861941	0.271138	0.179253	0.0894414	-0.556269	0.0848657	0.24492	0.0777185	0.204029	0.271508	-0.27266	0.318041	-0.21307	-0.324825	-0.138079	-0.0610447	0.0911899	0.217389	-0.123916	-0.0522191	0.201619	0.301758
ENSG00000111275	P05091	ALDH2	6	-0.506253	-0.359294	-0.0254366	0.0363281	-0.555659	0.101399	0.235166	0.444231	0.366659	0.253692	0.033499	0.448488	0.293336	0.26913	-0.331542	0.0380375	0.250985	0.344696	-0.502772	-0.60525	-0.572161	0.0203546	0.0162114	0.306154
ENSG00000111276	P46527	CDKN1B	6	-0.292157	-0.387115	-0.248562	-0.534653	0.159984	-0.141654	-0.255869	-0.164115	-0.375417	-0.155527	0.192259	0.137002	-0.497134	0.0836931	-0.0695171	0.2358	0.159972	0.210005	0.153498	0.40777	0.200197	0.326507	0.479026	0.376005
ENSG00000111300	Q14CX7	NAA25	5	0.0518927	0.00049489	0.220434	0.0560689	0.0926759	0.222399	-0.346472	-0.0460487	-0.0835993	0.0806582	-0.174543	0.268571	-0.0909305	0.0222432	-0.271851	0.0551225	-0.193255	0.333263	-0.0212102	0.238553	-0.185594	-0.085317	-0.257803	0.114248
ENSG00000111328	O14519	CDK2AP1	3	-0.23104	-0.0808699	-1.05757	0.41661	-0.15888	-1.35033	-0.41116	0.342405	0.0213589	0.289027	0.472312	-0.148122	-0.346836	-0.174139	0.0426558	-0.0634518	0.351905	0.229963	0.409248	-0.0762617	0.4317	1.03932	0.0117269	0.0404293
ENSG00000111361	Q14232	EIF2B1	5	0.235662	-0.190708	-0.134079	-0.0727113	-0.328774	-0.218529	0.0605681	-0.117346	0.0883858	-0.0387919	-0.142084	0.107214	0.213388	-0.124576	0.0347354	0.113632	0.118103	0.138341	-0.191813	-0.0127742	0.000734445	0.329512	0.0105491	0.121361
ENSG00000111364	Q8NHQ9	DDX55	5	0.0995112	0.279713	-0.089845	-0.270995	-0.14795	-0.162755	-0.17693	-0.308648	-0.302282	-0.0893634	0.221844	0.141234	-0.149785	-0.203092	0.200368	0.108949	0.269588	0.305953	-0.0361863	0.0266548	-0.0954311	0.0872556	0.110231	0.181961
ENSG00000111445	P40937	RFC5	1	0.800292	0.837763	-0.538075	0.882523	-0.0392698	-0.444964	0.699177	-0.453461	0.746364	-0.633472	0.0925814	-0.385528	0.836266	-0.448133	0.380129	-0.534305	-0.127594	-0.230393	0.362311	-0.638134	0.678517	-0.59584	-0.45188	-0.794873
ENSG00000111540	P61020	RAB5B	6	-0.0765731	-0.750597	0.18512	-0.43141	-0.0652432	-0.0355503	0.0879085	0.231102	0.242138	0.115741	-0.0260352	0.0741223	-0.203877	0.315058	-0.156073	-0.0281726	0.040965	-0.179873	0.294471	-0.275808	0.26241	0.00786781	0.118731	0.253577
ENSG00000111581	P57740	NUP107	1	0.555508	0.272381	0.0604218	0.0516487	0.0547652	0.232922	-0.235937	-0.309977	-0.0148829	-0.50809	0.114175	-0.101802	0.398004	-0.266652	0.189844	0.10726	-0.140071	-0.344285	0.360218	-0.304658	-0.160446	0.217006	-0.0464067	-0.180945
ENSG00000111602	Q9UNS1	TIMELESS	1	0.259532	0.589336	0.506725	0.121929	0.332092	0.763041	-0.0972082	-0.328673	-0.00378405	-1.11228	0.387455	-0.246268	-0.372209	-0.434432	-0.171322	-0.203073	0.52231	-0.146454	-0.0680373	-0.255641	-0.0715171	0.00365898	0.644252	-0.619436
ENSG00000111615	Q13601	KRR1	5	0.00116294	-0.198651	-0.221773	-0.316674	-0.0789257	-0.481357	-0.0899029	-0.240675	-0.113637	-0.161024	-0.237985	-0.0245239	-0.143512	0.0974469	0.368591	0.468109	0.101815	-0.174243	0.224712	0.200416	0.16901	0.643808	0.00758266	0.200229
ENSG00000111640	P04406	GAPDH	4	-0.255187	0.0091016	-0.499579	0.0933746	-0.0928652	-0.33472	0.130278	0.20097	0.352357	-0.238598	0.088984	0.237287	0.375549	-0.247098	0.133714	-0.036373	-0.265238	-0.135133	0.482792	0.121594	0.184315	0.0459334	0.012939	-0.364398
ENSG00000111641	P46087	NOP2	5	-0.321624	-0.0663144	0.087769	0.148723	-0.256201	-0.272846	-0.158503	-0.249675	-0.346552	-0.230156	0.287891	0.296561	0.050926	0.173389	-0.0216592	0.0658519	0.141987	0.435808	-0.0758278	0.0628756	-0.0104277	-0.0992014	0.0931423	0.264065
ENSG00000111642	Q14839	CHD4	1	0.0203284	0.438703	0.0515748	0.556355	0.21059	0.011068	0.210521	-0.0406929	-0.00170948	-0.0201645	0.156547	-0.137396	0.066161	-0.105991	-0.10536	-0.232121	0.000173861	-0.0913623	0.0868313	-0.203325	-0.154523	-0.343971	-0.049452	-0.322786
ENSG00000111669	P60174	TPI1	4	0.500236	-0.575407	0.548732	0.813835	0.360842	0.378906	0.642237	-0.176632	0.347472	-0.402837	-0.675036	-0.336994	0.868056	0.0189269	0.46512	-0.162663	-0.609475	-0.038678	-0.416162	-0.160688	-0.00720348	-0.128682	-0.873222	-0.380686
ENSG00000111716	P07195	LDHB	3	0.286293	0.436115	0.373072	0.170019	-0.151526	0.201071	0.371853	0.190576	0.111249	0.32568	-0.427975	-0.0108449	0.349214	0.352299	0.0625144	0.0331611	-0.338493	-0.112963	-0.360676	-0.696278	0.0894014	-0.372443	-0.468952	-0.412368
ENSG00000111726	Q8NFW8	CMAS	9	-0.357212	-0.228722	0.514999	-0.495644	0.467705	0.495632	-0.203453	0.336404	-0.0698995	0.733472	-0.536096	0.254563	-0.408344	0.533693	-0.169788	0.34701	-0.160208	0.412049	-0.716462	-0.0336677	-0.296691	0.0884169	-0.432682	-0.0750757
ENSG00000111731	Q86YS7	C2CD5	8	-0.130811	0.120535	-0.182004	-0.2364	-0.0252064	0.0542511	-0.0612596	-0.197391	-0.0994929	-0.0671821	0.0819391	0.0171297	-0.0916811	-0.0360726	0.117221	0.251582	0.0471633	0.116286	-0.109762	0.0109147	-0.0420739	0.294472	0.06	0.107843
ENSG00000111737	Q15286	RAB35	8	0.156917	0.0466611	-0.271138	-0.315806	0.00447383	0.174288	-0.0871857	0.622237	0.0849677	0.0440488	-0.22448	-0.218669	-0.0164416	0.214492	-0.399248	0.144718	0.122705	-0.13822	-0.273882	0.395832	-0.0202451	-0.327256	0.178241	0.10299
ENSG00000111752	P78364	PHC1	6	0.0879509	-0.0747434	-0.294588	0.264017	0.0246424	0.0878163	-0.0366549	-0.168424	0.00394618	-0.0752765	0.073845	0.0600357	0.199037	-0.0951561	-0.154735	-0.206015	0.26182	0.00131123	-0.153065	-0.0369942	0.237373	-0.0147661	-0.0780724	0.0866948
ENSG00000111790	Q9NVK5	FGFR1OP2	3	-0.250368	0.323384	0.0345098	-0.211196	-0.227066	-0.205365	-0.25481	-0.209344	-0.215934	-0.306008	0.0707816	0.061647	-0.268154	-0.120562	0.315061	0.359875	-0.10412	-0.0362133	0.267307	-0.0137166	0.566854	-0.0949391	0.315928	0.202449
ENSG00000111832	Q9H446	RWDD1	5	0.0140271	0.0100462	0.123177	-0.0135223	-0.204162	0.157102	-0.161247	-0.0447001	-0.0439559	0.133524	-0.205783	0.0554556	-0.145683	0.280632	-0.147381	0.351015	-0.167368	0.0434462	0.00743474	-0.178169	0.0724436	-0.193316	0.114328	0.142656
ENSG00000111859	Q14511	NEDD9	3	0.314325	-0.85589	-0.154964	-0.298955	-0.635963	-0.814242	0.335079	0.3215	-0.100215	-0.0941224	0.170561	0.292305	0.202409	-0.703197	0.0161182	0.301255	0.550826	0.399348	0.358461	0.353656	-0.0852233	-0.720383	0.618677	0.228635
ENSG00000111875	Q9Y294	ASF1A	5	0.0982899	0.0956566	-0.741569	0.106611	-0.519907	-0.632067	0.213106	-0.213885	0.110909	-0.208441	-0.0848243	0.197009	0.205524	-0.195115	0.109969	0.294981	0.326605	0.0418398	0.0282596	-0.0223922	0.173896	0.20219	0.118889	0.294468
ENSG00000111880	O60942	RNGTT	8	-0.0843998	-0.471617	0.350907	-0.371154	0.273497	0.0825206	-0.186638	0.272232	0.0851572	0.263149	-0.211049	0.0807537	-0.110483	0.250636	-0.418666	0.0805715	-0.11362	0.0331586	-0.140308	0.0513323	0.109428	0.145812	-0.0926842	0.121466
ENSG00000111897	Q9NRX5	SERINC1	9	0.0147116	-0.82794	1.33043	-0.495373	0.673766	0.313982	-0.286748	0.536651	-0.570517	0.602012	-0.773376	0.133583	-0.144213	0.524092	0.104851	0.430445	-0.351596	0.50954	-0.427028	-0.202374	-0.476203	-0.122595	-0.521687	0.0255896
ENSG00000111906	Q7Z4H3	HDDC2	1	0.836953	0.422232	-0.00299809	0.44803	0.0022641	0.40445	0.291218	-0.571577	0.315185	-0.656622	0.0226089	-0.371169	0.674907	-0.497325	0.54064	-0.324231	-0.234872	-0.592565	-0.19858	-0.158733	0.137916	-0.098419	-0.127237	-0.262074
ENSG00000111911	Q9NQE9	HINT3	8	-0.363359	-0.386832	0.174279	-0.337609	-0.0314523	-0.271506	-0.0232045	0.353041	0.0953625	0.154331	0.300396	0.0904453	0.0456478	0.233044	0.0450068	-0.0600545	0.299912	0.0294782	0.0309241	-0.198402	0.0803283	0.0274274	-0.11925	-0.167955
ENSG00000112081	P84103	SRSF3	3	0.23679	-0.0339315	-0.0759622	-0.261251	-0.450039	-0.151648	-0.0875963	-0.0698249	-0.102868	-0.219412	0.081758	0.0196413	-0.0152408	0.00258746	-0.000496187	0.0330479	0.145722	0.058616	0.20511	0.00952219	0.283631	0.0857947	0.128839	0.17721
ENSG00000112118	P25205	MCM3	1	0.189659	0.306123	0.731334	0.0485654	-0.0501215	0.832527	-0.182659	-0.593146	-0.0958223	-0.374712	0.114386	0.222119	-0.101981	-0.226716	-0.00794622	-0.487865	-0.253983	-0.104955	0.14784	-0.0035793	0.0442075	-0.251152	-0.0349022	0.132779
ENSG00000112182	Q9BYV9	BACH2	7	-0.377044	-0.893014	0.91814	-0.510439	0.748756	0.763864	-0.391484	0.380855	0.171211	0.280838	0.178232	0.114678	-0.51148	0.590816	-0.394189	-0.575542	-0.0349013	-0.0430429	0.0918834	0.0391514	-0.273404	-0.172942	-0.138099	0.0371564
ENSG00000112186	P40123	CAP2	9	-0.0186129	-0.183624	0.130041	0.37267	0.408619	0.124056	-0.0852343	0.274851	0.125454	0.218573	0.164271	0.0274466	-0.0701339	0.298641	0.0197537	-0.432352	-0.0766178	-0.106453	0.0159672	-0.39011	-0.254428	-0.302672	-0.323001	0.062896
ENSG00000112208	O95816	BAG2	2	-0.2226	0.00911714	-0.0885383	0.037383	-0.387619	-0.215016	-0.0172817	0.870769	-0.162433	0.534277	-0.236603	0.189401	0.0166548	0.314843	-0.210252	0.0591975	-0.0272051	0.0422534	0.119175	-0.220114	0.239805	-0.246535	-0.178235	-0.220443
ENSG00000112232	Q5VWX1	KHDRBS2	7	-0.0231099	-0.278534	0.0151343	0.088078	0.341429	0.384096	0.494078	0.19522	0.748202	0.429329	-0.365827	-0.241714	0.373917	0.716243	0.226561	-0.461128	-0.0936372	-0.581946	-0.140546	-1.25277	-0.109043	0.577635	-0.607472	-0.434191
ENSG00000112290	Q92558	WASF1	9	0.0753979	-0.376159	0.596689	-0.0370451	0.607284	0.315328	-0.344636	0.543926	-0.304437	0.530387	-0.170498	0.101594	-0.291889	0.576405	-0.350168	-0.391525	-0.0980004	-0.0914763	-0.602264	-0.388676	-0.0260799	0.289147	-0.29824	0.134936
ENSG00000112294	P51649	ALDH5A1	7	-0.10788	0.0576011	0.602371	0.16533	0.914541	0.633529	-0.702716	0.328756	-0.302558	0.137226	0.289982	-0.244192	-0.0205851	0.662965	0.470247	-0.389536	0.127564	-0.492935	-0.52412	-0.240829	0.212395	-0.523131	-0.115668	-0.938358
ENSG00000112304	Q9NPJ3	ACOT13	7	-0.136255	-0.153362	0.322134	-0.0561585	0.11868	0.0411723	-0.0169689	0.157537	-0.121863	0.51121	-0.203041	0.226858	0.0527463	0.665075	0.0501209	0.132534	-0.201224	-0.0101622	-0.360105	-0.0321028	-0.453186	-0.0927479	-0.394763	-0.0461283
ENSG00000112305	Q8IYB5	SMAP1	9	-0.0937306	-0.0789317	0.407498	0.19245	0.384332	0.406842	-0.217499	0.549405	-0.167586	0.524802	-0.434726	0.271939	-0.112987	0.497402	-0.172741	0.0963912	-0.350268	0.117418	-0.71259	-0.196787	-0.527428	-0.0637252	-0.328897	0.00941874
ENSG00000112320	A7XYQ1	SOBP	8	-0.714279	-0.723496	0.462452	-0.700576	0.143985	0.278612	-0.06449	0.868181	0.0240348	0.564263	-0.379163	-0.110033	0.519887	1.06551	0.0630511	0.248049	-0.753193	0.0303832	-0.433796	0.31187	-0.252339	0.302563	-0.875525	0.124052
ENSG00000112333	Q9Y466	NR2E1	1	-0.278482	0.28815	0.0528267	0.130507	0.409576	-0.503907	0.310557	0.465824	0.0198704	-0.755028	0.305217	-0.378648	-0.106625	0.501556	0.161936	0.272858	0.179564	-0.0155758	-0.586741	-0.464757	-0.220385	0.249532	-0.182126	0.144301
ENSG00000112365	O43167	ZBTB24	5	0.272074	-0.26627	0.137705	-0.0381029	-0.445139	-0.155703	-0.0751073	0.0453821	-0.242408	0.239705	0.0527232	0.259528	0.130265	0.109497	-0.142196	0.398229	0.118916	0.222241	-0.309487	0.18864	-0.0917256	-0.262382	-0.259056	0.112669
ENSG00000112379	Q5TH69	ARFGEF3	9	-0.214238	-0.667484	0.189845	0.00263567	0.0468399	-0.0823043	-0.366987	0.0651353	-0.0922097	-0.200657	0.355089	-0.025356	-0.626299	-0.000456828	0.223357	-0.206858	0.200459	-0.0511211	-0.0313564	0.3376	0.0431677	0.2673	0.506109	0.327789
ENSG00000112406	Q9UBI9	HECA	8	-0.195855	-0.504391	0.225774	-0.554937	0.289184	0.159478	-0.452347	0.0937574	-0.0043995	0.320435	0.407543	0.599465	-0.325229	0.180395	-0.2853	0.356981	0.0306299	0.484712	-0.134352	-0.372257	-0.217241	-0.158195	0.0910101	-0.0348606
ENSG00000112511	O43189	PHF1	8	-0.704933	-0.493015	-0.0520197	-0.648159	0.172184	-0.0866037	-0.463914	0.217595	-0.193962	0.442702	-0.0577606	0.417719	-0.593008	-0.0893136	-0.052264	0.453607	0.319001	0.522076	-0.360079	0.209979	-0.122221	0.599854	0.103029	0.459507
ENSG00000112531	Q96PU8	QKI	1	0.0541592	0.0977798	-0.234572	-0.145668	0.267729	-0.137877	-0.513965	0.14202	-0.397409	0.184499	0.167985	-0.266711	-0.104341	0.162373	0.0267133	-0.357175	0.208164	-0.300947	0.161707	0.321731	0.316122	0.429754	-0.0190997	-0.0629728
ENSG00000112655	Q13308	PTK7	3	0.0278506	0.303562	-0.0304777	0.106756	0.130527	0.102396	0.223604	-0.0190871	-0.0631667	-0.109164	-0.012738	-0.144527	0.118948	0.135631	-0.11735	-0.0929373	-0.160384	-0.0592578	0.0411093	-0.0998945	-0.0740097	-0.0900279	-0.0831259	-0.0342358
ENSG00000112685	Q96KP1	EXOC2	9	-0.118291	-0.509334	0.123348	0.0014521	0.359907	0.144299	0.0365494	0.559018	-0.155743	0.435391	0.0693258	-0.0442082	0.033817	0.548617	-0.120607	0.0577833	-0.117403	-0.0895012	-0.363777	-0.181416	-0.389227	-0.0365393	-0.0998068	-0.143655
ENSG00000112695	P14406	COX7A2	9	-0.409671	-0.835285	0.400641	-0.831991	0.215205	0.457989	0.141292	0.812311	0.196251	1.00653	-0.765721	0.0096758	0.185319	0.729078	-0.40367	0.11279	-0.748247	0.401091	-0.167063	-0.0254446	-0.297967	0.152806	-0.515691	0.179774
ENSG00000112697	Q9NV96	TMEM30A	7	-0.129153	-0.0403113	0.454357	-0.258309	0.0702298	0.058225	0.444089	0.108212	-0.276833	0.267196	0.022304	0.10226	-0.0321956	0.328908	-0.111225	0.0779365	-0.0878199	0.153697	-0.108148	-0.359648	-0.247979	-0.271462	-0.0854334	-0.0788985
ENSG00000112699	O60547	GMDS	9	-0.346124	-0.466279	0.133874	0.50751	0.243063	0.0655003	0.3391	0.526038	0.151734	0.44368	-0.10168	-0.227775	-0.0935806	0.931663	-0.45836	-0.698525	-0.338067	-0.0186644	-0.0502655	-0.297551	-0.38007	-0.0202984	0.11028	0.0447967
ENSG00000112739	Q13523	PRPF4B	1	0.242458	-0.0282112	0.0296767	0.194858	0.0215317	-0.339915	0.256491	-0.0550614	0.143573	-0.0717748	-0.103377	-0.119262	0.20363	0.0305792	0.106306	0.0147708	-0.0886052	-0.26027	0.129368	-0.115664	0.245721	0.0631435	-0.15936	-0.340606
ENSG00000112851	Q96RT1	ERBIN	1	0.00490848	-0.239923	-0.471308	0.258031	-0.845064	-0.618187	0.0961265	0.537952	0.269315	-0.258636	0.500235	-0.194601	0.162763	-0.144671	0.243909	-0.430382	0.136481	0.186199	0.731968	0.167779	0.0227534	-0.362557	0.167278	0.07963
ENSG00000112855	P49590	HARS2	8	0.109941	-0.0939464	-0.000244108	-0.122695	0.187237	-0.11074	0.032273	-0.133045	-0.519245	0.077963	-0.119693	0.333153	0.0352967	-0.181064	0.184607	0.15688	0.163114	0.00841455	-0.406395	0.396673	-0.136537	0.120248	-0.129368	0.147173
ENSG00000112874	Q9BQG2	NUDT12	3	0.0773646	0.130754	-0.359457	-0.0332226	0.152478	-0.0269681	0.0745482	-0.239461	0.58471	-0.000313844	0.171472	-0.0272951	0.517681	0.199906	0.105843	-0.190627	0.0688179	-0.117533	-0.0970999	-0.427463	-0.0636344	-0.464393	-0.0335077	-0.0025977
ENSG00000112972	Q01581	HMGCS1	4	-0.195798	-0.264042	1.10737	-0.293796	0.605729	-0.121864	0.213883	0.740109	-0.145034	0.612123	-0.678548	-0.105485	-0.0918208	0.719464	-0.300155	0.29481	-0.314073	0.159203	-0.703657	-0.339045	0.250603	-0.274453	-0.649675	-0.225852
ENSG00000112977	P51397	DAP	3	-0.0657895	-0.106148	-0.42292	-0.0866275	-0.510647	0.0324934	0.510393	0.0967543	0.430815	0.382961	-0.118079	-0.732788	0.233523	-0.0430214	0.509094	-0.0561802	-0.112701	-0.206768	0.274543	0.354974	0.069684	-0.0935114	-0.276494	-0.0635586
ENSG00000112983	Q9H0E9	BRD8	2	0.0387631	0.388914	-0.214263	-0.0340821	0.0620294	-0.198009	0.0458193	0.212346	-0.0953217	-0.00711441	-0.191672	-0.205783	0.136536	-0.226122	0.0688393	-0.0442823	0.0988917	-0.0232499	-0.0151558	-0.0629174	0.243959	0.0383857	0.00718656	-0.0236972
ENSG00000112992	Q13423	NNT	9	0.0494909	-0.161791	0.130938	0.0936264	-0.0984617	0.123496	0.125144	0.488916	0.130945	0.577659	-0.192811	0.149172	0.145455	0.542364	-0.0546232	0.155986	-0.281041	-0.0368159	-0.303456	-0.404723	-0.199812	-0.170984	-0.491591	-0.317085
ENSG00000112996	Q9NP92	MRPS30	6	0.0551296	0.2823	-0.261249	0.0650999	-0.344758	-0.0833739	-0.0389812	-0.406306	-0.11343	-0.0916519	0.267877	0.0658714	-0.0131775	-0.239423	-0.0098974	0.063635	0.130261	-0.0324582	-0.00543473	0.140485	0.0849545	0.216526	0.129198	0.138805
ENSG00000113068	O60925	PFDN1	9	-0.0792894	-0.400152	-0.173837	-0.138545	0.0936104	-0.0230484	0.311024	0.195318	0.0765767	0.1315	-0.239701	-0.0268932	0.0853639	0.17603	-0.11744	-0.0686742	-0.267097	0.130554	0.0926178	0.0324137	0.178219	-0.0219269	-0.0638154	0.117192
ENSG00000113161	P04035	HMGCR	4	-0.321543	0.0250356	0.320964	-0.0793985	0.508514	-0.174777	0.340501	0.296054	-0.420139	0.296482	-0.575445	0.135643	0.139261	0.461322	-0.191938	0.576385	-0.338795	0.497163	-0.27133	-0.0798557	-0.114927	-0.205936	-0.475795	-0.347448
ENSG00000113163	Q9Y5P4	CERT1	5	-0.100448	0.314002	0.222212	0.120231	0.0945199	0.0806277	-0.375859	-0.125634	0.135504	-0.328449	0.129716	0.131541	-0.166256	0.191452	-0.317898	-0.157903	0.00309879	-0.195996	0.1395	-0.0711964	0.0760532	-0.33402	0.306521	0.228679
ENSG00000113384	Q9H4A6	GOLPH3	9	0.00999564	-0.39071	0.126724	-0.15943	0.0416982	-0.109489	0.0439661	-0.157539	-0.000123967	0.0470227	0.0150058	0.0262455	0.00475059	0.065658	-0.158501	0.241902	0.20031	-0.141284	0.0443088	0.122641	-0.14914	0.177884	-0.0725372	0.170641
ENSG00000113387	P53999	SUB1	6	0.232323	-0.329593	0.40637	-0.283274	0.0256963	0.0125118	-0.00671544	0.596111	-0.0453364	0.640518	-0.459913	0.0339626	-0.207659	0.835228	-0.168701	0.00319755	-0.258565	-0.00736784	0.0296227	-0.115719	-0.0378954	-0.183207	-0.55503	-0.156565
ENSG00000113441	Q9UIQ6	LNPEP	1	-0.0456879	0.430709	-0.141394	0.299527	-0.110094	0.29191	-0.0143268	-0.166841	-0.0580772	-0.531562	0.475115	0.79361	-0.373957	-0.138164	-0.276018	-0.169229	-5.37e-05	0.264377	0.479982	-0.445116	-0.286881	0.202912	-0.647321	0.166578
ENSG00000113448	Q08499	PDE4D	6	-0.982739	-0.411297	-0.654067	-0.0303413	-0.181935	-0.690309	-0.0984008	-0.0991691	0.82109	0.324242	0.451636	0.205668	0.255495	0.477677	0.803284	-0.0574002	0.0739025	-0.352531	0.420341	0.393002	0.076953	-0.157151	-0.227147	-0.360804
ENSG00000113460	Q8TDN6	BRIX1	1	0.18719	0.106894	-0.528971	0.330209	-0.697413	-0.319267	0.140451	-0.370539	0.00358512	-0.208786	0.138366	0.139739	0.156234	-0.363699	0.161938	-0.00186805	0.0624101	0.0841764	0.359706	0.0344603	0.305409	-0.118539	0.0781017	0.320212
ENSG00000113552	P46926	GNPDA1	1	0.496877	0.433558	-0.563513	0.673509	-0.526186	-0.639901	0.597198	-0.0801245	0.654605	-0.202715	0.040397	-0.386267	0.766923	-0.165014	0.602196	-0.332407	0.234169	-0.40308	0.0750281	-0.446542	0.167563	-0.0995076	-0.167171	-0.729597
ENSG00000113569	O75694	NUP155	1	0.500746	0.245346	0.118276	0.366556	-0.0616464	-0.250749	0.0865905	-0.22146	0.306114	0.0591497	0.0862518	0.0957528	0.453021	-0.078971	-0.0661079	-0.492708	-0.207208	-0.289603	0.1903	-0.232371	0.220659	-0.361103	-0.10521	-0.361625
ENSG00000113593	Q96BP3	PPWD1	2	0.48908	0.277156	-0.375893	0.0631134	-0.132967	-0.345205	0.103002	-0.331203	0.112399	0.0214968	0.144771	-0.123083	0.368139	-0.0250608	0.0193954	-0.152945	-0.0541647	-0.153139	-0.00406403	-0.0682002	0.151883	0.0316773	0.111613	-0.1278
ENSG00000113595	P36406	TRIM23	5	0.0666939	-0.0785357	0.140931	-0.288299	0.171122	0.0248478	-0.389559	-0.123682	0.0102538	-0.0477197	0.129006	0.0757278	-0.0623396	-0.00876686	0.0528053	0.0597578	0.15104	-0.388306	0.0519302	-0.233206	0.0602868	0.217825	0.151968	0.256217
ENSG00000113638	Q6PID6	TTC33	7	-0.231183	-0.00820462	0.557723	-0.0869102	0.653563	0.372261	-0.190601	0.472541	-0.0531549	0.589037	-0.300929	0.0737462	-0.100566	0.551666	-0.295633	0.133858	-0.271821	0.106294	-0.485572	-0.194916	-0.318598	-0.255678	-0.472859	-0.244063
ENSG00000113648	O75367	MACROH2A1	3	0.148451	0.693034	-0.391444	-0.0479205	-0.389922	0.0327186	0.463252	-0.0649505	0.363198	-0.161774	-0.212833	-0.239989	0.264986	-0.218196	0.379854	0.190088	-0.137617	-0.0591769	0.112933	-0.229115	0.222961	-0.155115	-0.175551	-0.387872
ENSG00000113657	Q14195	DPYSL3	8	-0.407174	-0.0563505	0.627587	-0.276778	0.0774008	0.309494	-0.210545	0.412037	-0.0255947	0.381838	-0.108751	0.317071	0.0291458	0.276283	-0.237764	0.152759	-0.453957	0.315336	-0.577412	0.113884	-0.55027	0.13767	-0.579958	0.334046
ENSG00000113658	Q99717	SMAD5	1	-0.0876666	-0.442792	-0.559928	0.153966	-0.533	-0.765115	0.759489	-0.487178	0.310901	0.0954127	0.00787671	-0.154833	0.64807	-0.421463	0.681708	0.204083	0.318313	-0.405146	0.759809	0.139225	0.159185	-0.226946	0.050541	-0.204513
ENSG00000113742	Q17RY0	CPEB4	9	-0.211658	-0.555981	0.41852	-0.202642	0.434024	-0.106143	-0.322092	-0.225314	0.484523	-0.0143172	-0.0988022	0.0561097	0.269359	-0.439421	-0.197548	-0.0778469	0.111995	0.295039	0.131836	0.0298322	-0.21939	-0.101133	0.360718	0.180333
ENSG00000113758	Q16643	DBN1	8	0.0227	0.0565017	0.14303	-0.0374013	-0.213414	0.00166646	0.165836	0.2445	0.109989	0.0550532	-0.256685	-0.103609	0.194082	0.0765911	-0.182344	-0.058288	-0.1785	-0.0445675	-0.0349137	0.0993666	-0.0830865	0.0108661	-0.00413551	0.0167612
ENSG00000113810	Q9NTJ3	SMC4	1	-0.0597164	-0.0437352	0.317246	-0.274215	-0.20373	-0.0512525	0.302053	-0.197152	-0.114172	0.203056	-0.117616	-0.0157306	0.11727	0.122391	-0.0114271	-0.469074	-0.0117668	0.308408	-0.00603865	-0.088366	0.333447	-0.0159082	0.105079	-0.129046
ENSG00000114019	Q9Y2J4	AMOTL2	6	-0.263061	-0.280888	-0.119963	-0.44167	0.014646	-0.0184368	-0.223213	-0.308035	0.0114616	-0.544623	0.142527	0.0979259	0.0187813	-0.255438	-0.389329	-0.0235985	0.250056	0.347633	0.0710547	0.370329	0.232707	0.366799	0.438121	0.506213
ENSG00000114021	Q9NQR4	NIT2	6	-0.0337063	-0.0790064	0.00582562	-0.0808791	-0.0622778	-0.222582	-0.10028	0.089181	-0.213587	-0.103792	0.428603	0.295435	-0.144788	-0.0709726	0.185878	0.0230138	-0.183459	0.0169434	-0.187391	0.0174701	0.152195	0.174653	0.0906036	0.00292056
ENSG00000114054	P05166	PCCB	1	0.436573	0.230613	-0.152538	0.233038	-0.621926	0.0622362	-0.103698	-0.497574	-0.0461874	-0.0205891	0.211288	-0.215059	0.323953	0.0810591	0.146576	-0.656191	0.456157	-0.370229	0.554823	-0.473247	0.667406	-0.181022	-0.051568	-0.0138936
ENSG00000114302	P13861	PRKAR2A	7	-0.327814	0.115904	0.650548	-0.00240204	0.513323	0.489218	-0.329187	0.0226368	0.153797	-0.0185331	-0.0343619	-0.0915338	0.240156	0.349243	-0.0308535	-0.255896	-0.391324	0.059999	-0.283748	0.0643785	-0.20341	-0.203744	-0.326428	-0.159967
ENSG00000114316	Q13107	USP4	5	-0.225901	0.198242	-0.116938	0.0762716	-0.160632	-0.487819	-0.245925	0.168305	-0.0596389	0.0821772	0.153549	0.308888	-0.0546275	0.117085	-0.0127272	-0.263439	0.309493	-0.353863	0.0581152	0.0207028	0.179258	0.270953	0.173259	-0.134788
ENSG00000114353	P04899	GNAI2	1	0.462352	0.552942	-0.620571	0.808394	-0.454103	-0.31837	0.947859	-0.220717	0.716672	-0.327794	-0.143567	-0.665613	0.88181	-0.447219	0.443609	-0.437289	0.0121581	-0.526362	0.458159	-0.326584	0.337451	-0.42713	-0.178834	-0.527255
ENSG00000114354	Q92734	TFG	1	0.3304	0.199917	0.0682566	0.195192	-0.0679752	0.225966	0.0456716	0.0994786	0.0357206	-0.185512	0.201154	-0.210135	0.358873	-0.0819321	-0.113323	-0.602803	0.269089	-0.26501	0.204622	-0.382375	0.0279125	-0.130856	0.0120372	-0.234368
ENSG00000114423	Q13191	CBLB	8	0.0368897	-0.496443	0.0677285	-0.223726	-0.0806523	0.0577111	0.112809	0.170845	0.110419	0.34597	-0.0530933	0.0774638	0.124301	0.262441	-0.156887	0.150686	-0.105102	-0.138529	0.0908589	0.123944	-0.302436	-0.0962646	-0.0264809	-0.0524534
ENSG00000114439	Q8WY36	BBX	1	0.279457	-0.355773	0.0537202	0.0695173	-0.379591	0.447751	0.405024	-1.55091	-0.141688	-0.0292383	0.953481	-0.206943	0.13872	0.935004	0.0711712	-0.191493	0.235083	-0.47862	0.913835	-0.0367997	-0.129594	-0.889028	0.0113985	-0.124485
ENSG00000114450	Q9HAV0	GNB4	2	-0.198367	-0.479046	-0.152664	-0.371855	-0.240685	-0.644577	-0.0943966	0.283328	-0.029147	0.395426	0.13879	0.284631	-0.171635	0.299769	0.463345	0.0322588	0.120751	0.410481	0.50394	-0.781708	0.65883	-0.349842	0.0541109	-0.131738
ENSG00000114480	Q04446	GBE1	2	-0.219672	0.174563	0.0341903	0.133052	-0.253347	0.214057	0.1012	0.507872	0.329965	-0.950367	-0.0574337	-0.275135	0.262309	0.749266	-0.107486	-0.459492	0.35394	-0.122319	0.229103	-0.214516	-0.108358	-0.459956	0.0507473	0.0878182
ENSG00000114520	O95219	SNX4	9	-0.00818797	-0.3639	0.53391	-0.148907	0.725309	0.256268	-0.183691	0.0316848	-0.0461899	0.000480146	-0.357449	0.268039	0.0719603	0.0903199	-0.414108	-0.0816043	-0.376967	0.0554607	-0.0833883	0.0878343	-0.337792	0.214232	0.0302285	0.0364581
ENSG00000114554	Q9UIW2	PLXNA1	7	0.031966	0.471351	-0.0648039	0.323245	0.00577596	0.265902	0.379691	0.333867	0.467278	0.392393	-0.576258	-0.339916	0.237593	-0.122938	-0.247982	0.249704	-0.21287	0.0851808	-0.550009	-0.0797021	-0.410916	-0.0829388	-0.465564	-0.0900488
ENSG00000114573	P38606	ATP6V1A	9	0.199199	-0.213356	0.336356	-0.222898	0.0780135	0.387848	-0.565457	0.149322	0.11916	0.20594	-0.352609	-0.0475376	0.309031	0.0104985	0.284697	0.447759	-0.474421	-0.199883	0.0871246	-0.246604	-0.0820035	-0.017245	-0.204361	0.0114254
ENSG00000114742	Q8TAF3	WDR48	5	-0.029466	-0.138186	-0.130403	-0.194177	-0.0521026	-0.157146	0.250588	-0.0640657	-0.0533932	0.0466818	-0.0429595	-0.07149	0.175537	-0.00389056	-0.052253	0.104726	0.0820569	0.0501247	-0.0817993	-0.0444465	-0.0638457	0.161679	0.0565063	0.251725
ENSG00000114784	O60739	EIF1B	5	-0.304664	-0.324147	-0.0895522	-0.596388	0.0357192	-0.172497	-0.141193	0.215755	-0.166109	0.195633	-0.257337	0.506227	-0.458701	0.128696	-0.206912	0.498522	-0.336121	0.245184	-0.183786	0.615486	-0.230203	0.827439	-0.163555	0.362504
ENSG00000114805	Q4KWH8	PLCH1	1	0.112255	-0.308968	0.283035	0.171519	0.507476	0.317421	-0.0791442	-0.0651402	0.117957	0.0107386	0.225679	-0.0246699	0.0228706	0.271926	-0.0774512	-0.280173	-0.285597	-0.706177	-0.23375	0.186693	-0.0155569	0.26657	-0.187844	-0.229668
ENSG00000114857	P30414	NKTR	5	-0.0363217	-0.107316	-0.205165	-0.341045	0.0511967	-0.111346	-0.144635	-0.184288	-0.254022	-0.081296	-0.00335073	0.145033	-0.111746	-0.176877	0.0357144	0.342108	0.109026	0.140347	-0.196607	0.040417	0.213484	0.474222	0.211058	0.19141
ENSG00000114867	Q04637	EIF4G1	1	0.263618	0.152085	0.090097	0.398771	-0.0374755	-0.0967374	0.252091	0.04829	0.122479	-0.115104	0.0188977	-0.0104046	0.34788	0.0578789	-0.204133	-0.201701	0.153435	-0.0883319	-0.394385	-0.226445	-0.311018	-0.302019	0.139399	-0.0571654
ENSG00000114942	P24534	EEF1B2	3	0.210219	0.452065	0.0891841	0.219812	-0.357978	-0.165924	0.0274813	0.234064	-0.0756172	0.411283	-0.408307	0.099108	0.0201829	0.250209	-0.292153	-0.0284525	-0.294118	0.414209	-0.262646	-0.307593	-0.252726	-0.031158	-0.104863	0.153718
ENSG00000114999	Q8NG68	TTL	8	-0.219654	-0.0103598	0.0581168	-0.100949	-0.209522	-0.203777	0.0257055	0.717403	-0.0166851	0.34436	-0.365252	0.219163	-0.190413	0.235464	0.17961	0.19463	0.0578152	0.0783342	-0.241505	-0.193336	-0.140884	0.152161	-0.391816	0.0213913
ENSG00000115042	Q96GK7	FAHD2A	1	-0.147572	-0.0326068	0.138344	-0.197042	0.11876	0.0411276	0.188715	-0.510036	0.00509506	-0.155674	0.0372299	-0.00201432	0.0598153	-0.372022	0.226597	0.0808102	-0.075589	-0.0113154	-0.0999043	0.342024	-0.0610561	0.192154	0.0232242	0.210935
ENSG00000115053	P19338	NCL	1	0.356809	-0.00157079	0.0645872	0.169677	-0.0279077	-0.146675	0.261334	0.0692075	0.100126	0.0209599	-0.0752093	0.0659763	0.270096	-0.0029599	-0.132236	-0.172641	-0.101447	-0.0564092	0.100462	-0.23223	-0.0277949	-0.238564	-0.175981	-0.0876092
ENSG00000115073	P42025	ACTR1B	8	-0.151288	0.0889836	0.111559	-0.129857	0.216033	0.218555	-0.0574649	0.3356	-0.105585	0.131829	-0.205699	0.206832	-0.181454	0.30998	0.167439	-0.0891022	-0.0384923	-0.0195617	-0.260689	-0.0249948	-0.391026	-0.17855	-0.227522	0.274477
ENSG00000115091	P61158	ACTR3	9	-0.396068	0.0887437	-0.151145	-0.0805225	-0.151112	-0.186333	-0.250136	0.0648944	0.0180734	0.106425	0.0174028	0.347917	-0.0183439	0.368887	0.0518701	0.0464731	-0.0318477	0.32128	-0.155695	-0.172996	0.073051	0.09506	-0.117179	0.111302
ENSG00000115109	Q9HCM4	EPB41L5	2	0.625042	0.0908998	-0.593879	0.238311	-0.37196	-0.510797	0.270121	-0.558182	0.317047	-0.383928	0.341235	-0.223739	0.469935	-0.755675	0.0582143	-0.164172	0.210742	-0.753913	0.57391	0.0230924	0.730576	0.168759	0.239261	-0.0409005
ENSG00000115145	O75886	STAM2	8	-0.30393	-0.275022	0.0781907	-0.273192	0.0565756	0.0644844	0.112737	0.437516	-0.223806	0.10769	-0.117606	0.0673242	-0.0424815	0.254478	0.300179	0.110792	0.00556278	0.208084	-0.147622	0.155912	-0.328958	-0.0629867	-0.121798	-0.0621229
ENSG00000115183	Q9C0D5	TANC1	2	-0.215788	-0.437805	-0.916136	0.354621	-1.58447	0.150795	-0.508125	-1.2769	-0.110245	-1.029	0.66547	0.609057	0.911954	-0.293666	-0.450692	0.587555	0.29025	0.943751	-0.550353	0.568359	0.0839242	1.07022	0.153475	0.983749
ENSG00000115233	O00487	PSMD14	7	0.101344	-0.0996748	0.160504	0.157004	0.0883286	-0.0829955	0.520745	-0.0196298	0.203863	0.210315	-0.276827	-0.326153	0.398022	0.125408	0.150256	0.146304	0.0293234	-0.0641726	-0.14332	-0.37911	-0.00674089	-0.328569	-0.302647	-0.261577
ENSG00000115234	Q15036	SNX17	5	-0.00684359	-0.0982962	-0.474737	0.0522108	-0.248369	-0.32738	0.431282	-0.506087	0.305372	-0.305485	0.146168	-0.259592	0.47119	-0.309729	0.255579	-0.167661	0.311072	-0.163974	0.362717	-0.0503597	0.257133	0.0281834	0.257498	0.0401105
ENSG00000115266	O95996	APC2	8	-0.599383	-0.826244	0.673303	-0.329979	0.649018	0.696885	-0.674971	0.354721	-0.0264112	0.343501	-0.0500967	0.229324	-0.231205	0.227124	-0.855079	-0.194756	-0.169984	0.100962	-0.307614	0.248936	-0.215536	0.457326	0.0665121	0.433646
ENSG00000115268	P62841	RPS15	3	0.429117	0.751304	-0.273253	0.363781	-0.926007	-0.518162	0.796751	0.172633	0.520826	0.318457	-0.216993	-0.365246	0.605718	0.164892	0.125659	-0.241356	-0.168067	-0.244182	-0.0169896	-0.477329	-0.0155979	-0.469688	0.0147696	-0.331038
ENSG00000115271	P28676	GCA	1	0.0428253	0.255587	-0.291566	0.409894	-0.036289	-0.323776	0.297791	-0.7004	0.369202	-0.172867	0.299174	-0.508895	0.336141	-0.392249	0.426774	0.323917	0.124428	0.171386	0.0847491	-0.157173	0.257255	-0.550119	-0.0484599	-0.217329
ENSG00000115286	O75251	NDUFS7	9	0.0709939	0.553478	0.0369672	0.0406061	0.28723	0.511362	0.0393479	0.422164	-0.0528231	0.0885412	-0.312843	0.0187803	-0.299106	0.117939	-0.113574	0.0693291	-0.112772	-0.159622	0.0397006	-0.447994	-0.204719	-0.21835	-0.259018	-0.115618
ENSG00000115306	Q01082	SPTBN1	7	0.239598	-0.109186	0.461266	0.424131	0.214311	0.126137	-0.413476	0.120112	0.0358215	0.033791	0.190607	0.0854159	-0.0234801	0.0324698	-0.269458	-0.320199	0.028858	-0.0262379	-0.208001	-0.178124	-0.159592	-0.20908	-0.0312522	-0.0444317
ENSG00000115310	Q9NQC3	RTN4	9	-0.501455	-0.433672	0.521544	-0.628696	0.385393	0.353567	-0.115291	0.59429	-0.108285	0.684548	-0.368842	0.27109	-0.331438	0.548363	-0.319474	0.399042	-0.412862	0.323535	-0.119595	-0.158859	-0.377635	0.228703	-0.446114	0.0121437
ENSG00000115317	O43464	HTRA2	8	-0.401347	-0.25944	0.204164	-0.244484	0.285849	0.00122555	0.0255985	0.561209	-0.0560459	-0.121089	-0.384941	0.700906	-0.278671	0.112592	-0.529174	0.13342	0.714566	0.475437	-0.0650997	-0.0761062	-0.0150754	-0.0641829	-0.617692	-0.101618
ENSG00000115355	Q3V6T2	CCDC88A	8	0.0304165	0.108006	0.155264	0.0611854	-0.0515352	0.00391482	-0.305401	-0.0115216	-0.195709	-0.181158	0.127017	0.162007	-0.170785	0.00890113	0.165058	0.100401	0.0770994	-0.10834	-0.00446623	-0.0068049	-0.069259	0.14919	-0.106245	0.0627639
ENSG00000115365	O43813	LANCL1	7	-0.134878	-0.0510254	-0.109345	-0.117695	-0.148988	-0.0350352	0.191737	0.27602	0.190648	0.467036	-0.0433797	-0.0747032	-0.00524647	0.238063	0.0356519	0.286025	0.0256825	0.0104432	-0.299908	-0.171673	-0.238856	-0.115722	-0.259829	0.0849768
ENSG00000115415	P42224	STAT1	1	0.516579	0.0411092	-0.458599	0.178378	-1.14396	0.132397	0.0835019	0.0163239	0.260368	0.326539	-0.0457296	-0.126364	0.285163	0.0376253	0.399268	-0.329599	0.111328	-0.0563927	0.0436142	-0.293945	0.294751	0.130537	0.0906572	-0.493548
ENSG00000115419	O94925	GLS	9	-0.175564	-0.210348	0.448978	-0.307867	0.140568	0.175592	-0.0264874	0.363979	-0.0973787	0.405506	-0.568237	-0.0222064	0.113763	0.425547	-0.20525	0.364406	-0.456339	0.0643079	-0.124643	-0.0179933	-0.186374	0.239833	-0.0963613	-0.247432
ENSG00000115457	P18065	IGFBP2	1	0.689703	0.236595	0.187326	0.777659	0.0163201	-0.356639	0.353707	-0.0873908	0.34777	-0.0341462	0.0870631	-0.509635	-0.11448	-0.428341	0.435519	0.259634	-0.605809	-0.585851	0.331961	0.855521	-0.528655	-0.561082	-0.439142	-0.327606
ENSG00000115461	P24593	IGFBP5	6	-0.529815	-0.857818	0.158974	-0.308921	-0.507851	0.656238	-0.0630993	0.420414	-0.318897	0.615393	-1.29019	0.367453	-1.04343	0.186971	-0.316813	0.657166	-0.751239	0.849447	0.230577	1.68581	0.207691	0.521803	-1.00057	0.4307
ENSG00000115484	P50991	CCT4	7	0.202309	0.176321	0.087522	0.283921	-0.209974	-0.0811585	0.231323	0.266159	0.078958	0.245381	-0.0670577	0.0342577	0.322416	0.357716	-0.0821748	-0.0975966	-0.123349	0.141832	-0.419537	-0.497016	-0.311835	-0.344584	-0.133902	-0.0599339
ENSG00000115504	Q8NDI1	EHBP1	9	-0.458481	-0.639833	0.661727	-0.586232	0.208723	0.556999	-0.704377	0.647912	-0.406658	0.489231	-0.0552412	0.525207	-0.500955	0.743115	-0.463287	-0.143975	-0.124701	0.227528	-0.421811	0.0109021	-0.0583415	0.277514	-0.00255464	0.217588
ENSG00000115548	Q9Y4C1	KDM3A	1	0.170495	0.195007	0.100116	0.150439	0.210886	-0.142709	0.4856	-0.0694514	0.18722	-0.00242499	-0.228413	-0.631651	0.286647	-0.343839	0.183242	0.246499	0.15439	-0.148575	-0.591207	-0.546983	0.177054	0.184684	0.189035	-0.216059
ENSG00000115561	Q9Y3E7	CHMP3	5	0.0290105	0.00228735	-0.196964	-0.0852064	-0.38245	-0.265263	-0.169082	0.0275073	-0.175549	0.224108	0.0401484	0.14386	0.133002	0.282261	-0.459552	-0.0910844	0.0984542	0.158751	-0.0480416	0.0141135	0.27209	0.19652	0.200456	0.0506234
ENSG00000115657	Q9NP58	ABCB6	5	0.262226	0.289325	-0.119843	0.57292	-0.248944	-0.0452881	-0.037655	-0.246981	-0.106058	-0.253686	0.411515	-0.103804	0.248797	-0.28786	0.101603	-0.0848892	0.165486	-0.101978	-0.155862	-0.359654	0.0207829	0.0500757	0.189792	-0.16002
ENSG00000115760	Q9NR09	BIRC6	5	-0.0358406	-0.345146	0.206466	0.00392686	0.149076	0.0315906	-0.209766	0.164038	-0.194423	-0.103061	0.0702197	0.293644	0.0749968	0.145625	-0.217072	-0.102701	-0.246706	-0.180435	0.132404	0.233787	0.0894723	0.262742	-0.248614	0.0257743
ENSG00000115761	Q9BSC4	NOL10	1	0.321542	0.269674	-0.594294	0.138422	-0.830706	-0.635191	0.0159157	-0.175058	0.121653	-0.311875	0.163231	0.160412	0.402536	-0.243026	-0.0238352	-0.0974089	0.39627	-0.192959	0.150597	-0.0513119	0.135194	0.457916	0.317785	0.104519
ENSG00000115840	O75746	SLC25A12	9	-0.339974	0.0196084	-0.0913463	-0.109699	0.0321218	0.0606549	0.219698	0.066267	0.139032	0.174491	0.0642789	-0.0175738	-0.0490147	-0.0355549	0.130891	0.371307	-0.102189	0.00469776	-0.093289	0.014649	-0.13431	0.132209	-0.416568	-0.0403861
ENSG00000115866	P14868	DARS1	1	0.0561978	0.238648	0.0365489	0.0311301	-0.144442	0.232998	0.0537838	0.3675	0.144037	-0.102855	-0.166045	-0.111189	0.123851	-0.0595827	0.0561036	-0.238562	-0.335303	0.223721	-0.0975716	-0.125218	0.0699771	-0.382088	0.17186	-0.043499
ENSG00000115904	Q07889	SOS1	6	0.0195594	-0.245755	0.102366	0.0634561	0.0214899	-0.213839	-0.344062	-0.0207948	-0.266799	-0.286494	0.076339	0.120297	0.103048	0.15763	-0.0403742	-0.164782	0.183206	-0.331123	0.0908751	0.062532	0.248386	0.418458	0.0700028	0.176377
ENSG00000115947	O43929	ORC4	5	-0.310459	-0.515295	0.292422	-0.470531	0.14246	-0.267331	0.0569179	-0.061314	0.0921623	0.248276	-0.220873	0.18342	-0.0265822	0.297899	-0.0882526	0.137256	-0.112588	0.199896	-0.0153872	0.144248	-0.000481377	0.0778751	-0.0802289	0.296491
ENSG00000115966	P15336	ATF2	8	-0.293127	-0.203269	0.386231	-0.32236	0.307837	0.173295	-0.452071	0.284568	-0.405844	-0.0250652	0.159761	0.479862	-0.290621	-0.00871661	-0.467174	0.0133392	-0.0136082	0.188607	-0.234	0.0956366	-0.016359	0.348181	0.124268	0.17063
ENSG00000115977	Q2M2I8	AAK1	9	-0.392248	-0.92379	-0.616891	0.265112	0.402882	0.432597	-0.742577	0.728034	0.0778552	0.0026133	-0.506772	0.849007	0.0225668	0.243728	-0.0644233	-0.182113	-1.13903	0.416393	0.412926	0.763691	-0.163176	-0.0958022	-0.539262	0.748684
ENSG00000116001	P31483	TIA1	5	-0.056022	-0.0377911	-0.115874	-0.323984	0.157446	0.0309571	0.00953177	-0.0389076	0.000670403	0.124032	-0.317534	-0.000801038	-0.077307	-0.140929	-0.0287402	0.261725	-0.099822	0.16344	-0.0926281	-0.0263923	0.0844379	0.36926	0.0269466	0.128287
ENSG00000116062	P52701	MSH6	1	0.382132	0.281392	-0.397794	0.385193	-0.331348	-0.365205	0.328326	-0.222641	0.240022	-0.241476	0.0632568	-0.129712	0.435223	-0.199491	0.0589228	-0.00156584	-0.0472075	-0.139619	0.0563452	-0.212231	0.102365	0.000689255	-0.0392573	-0.00631841
ENSG00000116120	Q9NSD9	FARSB	9	-0.0170648	-0.218075	0.215879	0.146116	-0.0558766	-0.0438332	0.0566332	0.286141	-0.0859811	0.264337	-0.297418	0.100278	0.253173	0.325152	0.00695525	0.0976369	-0.175414	0.079988	-0.126061	0.0265759	-0.0807975	-0.082129	-0.512102	-0.164112
ENSG00000116133	Q15392	DHCR24	4	-0.135382	0.535204	-0.179401	0.925193	-0.572462	-0.376497	0.991906	-0.00451211	0.246705	-0.25958	0.0421564	-0.654899	0.338587	-0.148011	0.568122	-0.0705573	-0.182562	-0.0751992	0.162269	-0.295697	0.733481	-0.904539	-0.740558	0.0562328
ENSG00000116141	Q9P0L2	MARK1	8	-0.0571075	0.0610402	-0.0536542	-0.279626	0.125999	0.0809253	-0.0376063	0.21962	0.171956	0.281937	-0.252368	-0.0411611	0.0018297	0.0366234	-0.133853	0.132722	-0.0204774	0.189321	-0.270638	-0.0539389	-0.180162	0.173646	-0.245103	0.150077
ENSG00000116161	Q9HB71	CACYBP	4	0.231115	0.464373	0.000690252	0.21609	-0.133658	0.181214	0.284268	0.198554	0.10102	0.167614	-0.463146	-0.00681593	0.273386	0.20424	0.0421115	0.0394263	-0.63092	-0.00712777	-0.305719	-0.460065	0.00144074	0.147515	-0.720726	0.175122
ENSG00000116171	P22307	SCP2	1	-0.311988	0.49574	-0.148174	0.370184	-0.696577	-0.920244	0.527741	0.580456	0.275835	0.831925	0.178247	-0.209592	0.0574162	0.165488	0.72284	-0.413581	-0.611181	-0.478559	0.10752	-0.25467	-0.00162034	-0.236994	-0.00744295	-0.0227682
ENSG00000116199	O75063	FAM20B	9	-0.355948	-0.615544	0.0346453	-0.278908	0.0422494	-0.0730492	-0.0859174	0.51008	0.0304364	0.499009	-0.261089	0.0112326	-0.558947	0.394936	-0.0470241	0.412391	-0.107061	0.437125	0.208852	0.100632	-0.238882	-0.165536	-0.106938	0.213255
ENSG00000116221	Q9BZE1	MRPL37	3	0.203916	0.346118	-0.228037	0.174895	-0.409195	-0.334421	0.24228	0.107847	0.244518	0.236489	-0.339935	-0.00984464	0.194263	0.499491	-0.0226633	-0.305151	-0.0580157	0.144805	0.134521	-0.599703	0.0387531	-0.350821	0.123597	-0.0337052
ENSG00000116237	O60725	ICMT	4	0.530767	0.261885	-0.176661	0.807952	-0.0736086	-0.18681	0.633052	0.0305486	0.471654	-0.0675966	-0.303791	-0.363766	0.538435	0.152777	-0.0570359	-0.15237	-0.395066	-0.0966389	0.106605	-0.414693	0.066884	-0.508213	-0.703264	-0.101045
ENSG00000116266	O00186	STXBP3	1	0.514975	0.426585	0.317945	-0.0164749	0.438207	-0.0134244	0.0306805	-0.457178	-0.202735	-0.0483319	0.146409	-0.0588056	0.04215	-0.14143	0.38913	-0.0232208	0.119109	-0.0591316	-0.462698	-0.532662	-0.182503	-0.514428	0.256218	0.0316144
ENSG00000116288	Q99497	PARK7	3	-0.0874884	-0.305854	0.15772	-0.199309	-0.272389	-0.0525537	0.43054	0.577834	0.273981	0.515348	-0.583997	-0.326215	0.249994	0.678681	0.14501	-0.104129	-0.366389	-0.232329	0.174532	-0.211233	0.132675	-0.0335573	-0.295344	-0.265527
ENSG00000116299	Q6UXG2	ELAPOR1	9	-0.168088	-0.113168	-0.384862	0.535253	-0.255941	0.00724329	0.0263618	-0.00357326	0.669595	0.372173	0.201242	0.169911	0.186399	0.0762717	0.0418824	-0.14065	-0.0818315	-0.222424	-0.625456	0.050124	-0.31197	-0.0274501	0.126429	-0.127471
ENSG00000116350	Q08170	SRSF4	3	0.0618653	0.155859	-0.0992801	-0.264832	0.00665842	-0.0829446	0.0587575	-0.0461216	-0.00355424	-0.0989386	-0.0966963	-0.151056	-0.0935795	-0.265504	-0.00403318	-0.00144784	0.303966	0.19351	-0.0097792	-0.0636917	0.203889	0.033343	0.113207	0.150403
ENSG00000116459	P24539	ATP5PB	7	-0.150745	-0.28404	0.164374	-0.272741	0.115211	0.0468043	0.0850648	0.221664	0.0931645	0.344416	-0.156338	-0.0319103	-0.088577	0.489238	-0.0505684	-0.0509182	-0.165951	0.105767	0.0307367	-0.190324	-0.0808831	-0.170038	-0.0302336	0.0268251
ENSG00000116478	Q13547	HDAC1	1	0.124856	0.528352	-0.064805	-0.0875837	-0.525407	-0.166046	-0.166166	-0.162085	-0.172533	-0.316033	0.0340936	-0.243265	-0.162428	-0.0988455	-0.0544205	-0.0553265	0.268569	0.3243	0.175022	-0.0634009	0.16191	0.087698	0.316672	0.316871
ENSG00000116584	Q92974	ARHGEF2	6	-0.435758	-0.2104	-0.370525	0.0991007	-0.450243	-0.192272	0.119309	0.244065	-0.00428696	0.0371293	-0.179605	0.123263	0.0691631	-0.0551314	0.142572	0.17859	-0.0394014	0.323572	0.0115585	0.22073	-0.0659303	0.26478	-0.0358981	0.205619
ENSG00000116604	Q14814	MEF2D	9	-0.22905	-0.259002	0.279992	0.0425418	0.311864	-0.0760189	-0.357909	0.0299655	-0.308013	-0.0253769	0.560494	0.599201	-0.312494	-0.169541	-0.098329	0.376058	0.0844457	0.032444	-0.379652	0.00234753	0.00812553	-0.0848173	-0.194078	0.166803
ENSG00000116649	P19623	SRM	9	-0.348981	-0.0942936	-0.378233	0.142202	0.310923	0.0438667	-0.587948	0.411732	-0.0889618	0.348184	-0.253273	-0.460467	0.0913171	0.28684	-0.321581	0.380245	0.0833093	-0.370039	0.0139688	0.082018	0.23639	0.529258	0.0874723	-0.143949
ENSG00000116663	Q9NRD1	FBXO6	9	-0.484928	-0.145608	0.169466	-0.0230497	-0.283836	0.0880604	-0.531553	-0.0179785	-0.504138	0.847775	0.256	0.568211	-0.242774	0.0843238	-0.263344	1.3022	0.308731	0.397393	-0.79228	0.269886	-1.02245	0.0357768	-0.0291614	0.0132765
ENSG00000116675	O75061	DNAJC6	9	0.256367	-0.496602	0.456477	-0.692759	0.160704	0.224768	-0.474909	0.138454	0.0836447	0.212881	0.48368	0.304445	-0.243163	0.0657015	0.559207	-0.391871	0.33437	0.437026	-0.108732	-0.289359	-0.305434	-0.57847	-0.170363	0.0339391
ENSG00000116679	Q9Y6Y0	IVNS1ABP	1	0.00318307	0.180453	-0.374235	-0.0880506	-0.0479491	-0.366835	0.025829	-0.260448	-0.124462	-0.191476	0.189671	0.0907271	-0.0887745	-0.293193	0.0562943	-0.0547634	0.249394	0.484721	-0.115443	-0.228042	0.208678	0.036184	0.301102	0.407433
ENSG00000116688	O95140	MFN2	8	-0.0994785	-0.321029	0.121015	-0.190561	0.0582446	0.129161	0.0112493	-0.0346938	-0.0979985	0.0707365	0.0128262	0.117552	-0.114801	0.122328	-0.218728	-0.0192215	0.243839	0.266382	0.0316285	0.103542	-0.310129	0.0210185	-0.0832571	0.180376
ENSG00000116747	P10155	RO60	1	0.194559	0.386016	-0.121903	0.260831	-0.14684	-0.360208	-0.0427323	-0.408592	-0.310005	-0.411569	0.529467	0.17911	0.191039	-0.155698	0.1303	-0.541463	0.40506	-0.574248	0.122326	0.172522	0.307695	-0.00553508	0.293453	-0.0935855
ENSG00000116754	Q05519	SRSF11	5	-0.07136	-0.12997	-0.239999	-0.338681	-0.0711255	-0.0596733	0.080719	-0.181846	-0.014228	0.0306512	-0.127626	0.0503718	0.0167236	-0.169966	0.0481671	0.319688	0.00535789	0.0966273	-0.00364498	0.118941	0.124788	0.305162	0.053974	0.15695
ENSG00000116761	P32929	CTH	3	0.80897	0.0364399	0.438856	-0.238591	-0.0126854	0.375701	0.263294	0.217629	-0.4658	0.505684	-0.0143663	-0.492552	-0.0928873	0.168638	-0.27557	0.35772	0.658749	0.500797	-0.724683	-1.57563	-0.517641	-0.534982	0.439324	0.173586
ENSG00000116809	Q13105	ZBTB17	5	-0.202661	-0.41055	-0.133233	-0.465364	-0.253073	-0.112587	-0.0497592	0.0207305	-0.066564	0.272755	-0.161935	0.19801	-0.121658	-0.0672378	-0.117918	0.170181	-0.0993915	0.392714	0.0118676	0.229148	-0.0245604	0.370135	0.091231	0.529718
ENSG00000116830	Q9UNY4	TTF2	1	-0.0374706	-0.36659	0.078692	0.0308776	-0.0676053	-0.472598	0.372337	-0.369724	-0.117682	-0.423158	-0.130771	-0.231981	0.275074	0.49315	0.181126	0.562376	-0.381716	0.113138	0.210918	-0.336009	0.284926	0.600154	0.125105	-0.392569
ENSG00000116852	O75037	KIF21B	9	-0.781045	-0.107647	0.450093	0.487308	0.29651	0.205144	0.0742372	0.449501	0.0602466	0.297828	-0.0354204	0.0822983	0.0536	0.324975	-0.176374	-0.346084	-0.378718	0.0213673	-0.00627952	0.0417511	-0.274765	-0.306963	-0.400621	-0.0309418
ENSG00000116863	Q9NX46	ADPRS	9	0.0236477	-0.0798692	-0.13762	-0.138018	0.0722647	0.167978	-0.306274	0.0932035	-0.35994	0.147606	0.166836	-0.00550198	-0.245222	-0.0603349	0.127846	0.103773	-0.0676621	0.157441	0.10356	0.0379554	-0.266044	0.115575	-0.0185304	0.367331
ENSG00000116871	Q3KQU3	MAP7D1	9	-0.398708	0.0862663	-0.190346	-0.172897	-0.251964	0.183693	0.109412	-0.00102054	-0.171273	0.195155	-0.00723275	0.087281	0.0139766	-0.0223902	0.0352565	-0.0409228	0.183427	0.166996	-0.152555	0.00127979	0.037901	-0.0197499	0.154354	0.17406
ENSG00000116874	Q9UGM6	WARS2	6	0.311601	0.0302277	0.0524444	-0.0275642	-0.327473	-0.27418	-0.574099	-0.000258129	-0.027875	0.142561	0.183405	0.370378	-0.379912	-0.0789403	-0.443145	-0.21245	0.154848	0.0657344	0.0312165	0.338696	-0.348713	0.51752	0.35007	0.145908
ENSG00000116898	P82914	MRPS15	3	0.26346	0.388335	-0.0751838	0.191052	-0.306203	-0.287056	0.316749	0.112915	0.0325387	-0.0852249	-0.569837	0.165783	0.417435	0.279509	0.0129945	0.0474739	-0.239359	-0.110631	-0.301293	-0.111911	-0.108816	-0.121295	-0.223365	0.31193
ENSG00000116954	Q9HB90	RRAGC	6	0.282456	-0.0640061	0.163326	-0.135018	-0.103352	-0.295191	-0.0118282	0.166946	-0.307128	0.003752	-0.0528761	0.263599	-0.134761	-0.116842	0.0819305	0.172136	0.295556	0.261048	0.0629693	-0.114282	-0.261053	-0.27704	-0.0365568	0.156214
ENSG00000116984	Q99707	MTR	1	0.109495	-0.0604232	-0.209945	-0.116135	-0.163155	-0.268785	0.098984	-0.221922	0.0588471	-0.206861	0.0231919	0.152175	0.0644448	-0.120178	0.166055	0.0628574	0.0920657	0.16885	0.0187426	0.0177408	0.14477	0.14393	-0.129982	0.175236
ENSG00000117000	Q13129	RLF	5	-0.000185459	-0.05775	0.0164461	-0.0214726	0.356033	0.390079	-0.632093	-0.0978767	-0.267006	0.00107262	-0.0279383	0.355651	-0.139992	0.0124281	-0.299476	0.140956	-0.162992	0.0749557	-0.186977	0.0481299	0.00969876	0.263951	-0.0369611	0.261319
ENSG00000117020	Q9Y243	AKT3	9	-0.00563022	0.238859	0.335003	-0.147309	0.0930057	0.0909556	-0.200781	-0.0356771	-0.162386	-0.0438879	0.390077	0.437968	-0.258429	-0.00328826	-0.286898	-0.276831	0.1381	0.0328017	-0.0917094	-0.00139341	-0.0940443	0.0439353	-0.207953	0.0155113
ENSG00000117054	P11310	ACADM	2	0.104175	0.24746	-0.260522	0.141871	-0.205307	-0.120779	0.281825	-0.525722	0.331474	-0.526919	0.242423	-0.104283	0.111097	-0.293706	0.3462	-0.134374	-0.0968745	-0.200161	0.0891287	-0.0480188	0.513758	0.174392	0.0295242	-0.0966628
ENSG00000117266	Q07002	CDK18	4	0.221334	0.181868	-0.0194566	0.121236	0.499447	0.277174	-0.275047	0.0703384	0.310378	0.266655	0.102189	-0.270857	-0.537621	-0.731875	0.296176	0.172114	-0.0220106	0.430836	-0.362794	-0.258982	-0.335486	-0.293672	0.23142	-0.0733609
ENSG00000117305	P35914	HMGCL	4	-0.211124	0.132814	0.386723	0.0177665	-0.0914967	-0.326352	0.203113	-0.514962	0.250184	-0.32771	-0.0202053	-0.194122	0.118814	0.0614867	0.3323	0.10313	0.17072	0.0844224	0.207838	0.0862773	0.0121975	-0.416143	-0.190494	0.124822
ENSG00000117394	P11166	SLC2A1	1	0.955234	-0.51769	0.00100463	0.559132	0.202298	-0.316437	0.0806137	-0.359114	0.167699	-0.225383	-0.259451	0.606289	0.435	-0.855807	0.352084	-0.211569	0.334276	0.0879703	-0.0911094	0.115119	-0.38052	-0.296323	0.194615	-0.57793
ENSG00000117419	O43414	ERI3	7	0.0350696	-0.159718	0.210719	0.276904	0.00958861	0.0359519	0.0473192	0.38895	-0.0261674	0.439257	-0.397271	-0.169642	0.18238	0.613848	-0.152765	-0.167874	-0.48582	-0.0426958	-0.277539	-0.0420121	-0.284444	0.134494	-0.388382	0.219849
ENSG00000117448	P14550	AKR1A1	9	-0.145942	0.195256	0.0627351	0.161618	0.0433133	-0.189517	0.00953963	0.532323	-0.0230808	0.669523	-0.0168367	0.344285	-0.00543117	0.30265	-0.0181296	0.19073	-0.418721	0.147822	-0.463989	-0.684025	-0.398298	-0.013802	-0.274462	-0.00756113
ENSG00000117480	O00519	FAAH	9	0.428338	0.204008	0.0662928	0.0547037	-0.267367	0.538195	0.0692414	-0.079048	-0.152618	0.082105	-0.225113	0.0444932	-0.000818714	-0.13185	0.380567	0.209657	-0.213474	0.169217	-0.465008	-0.0429186	-0.125908	-0.0441023	-0.370364	-0.128228
ENSG00000117519	Q15417	CNN3	1	0.326846	-0.0554894	-0.322159	0.0705503	-0.418401	-0.278023	0.114062	-0.0694828	-0.12624	0.0653725	-0.00657741	0.0562517	-0.0584364	0.25642	0.0491459	0.150019	-0.120618	0.0448149	-0.438386	0.0267146	0.152922	0.425558	-0.104801	0.259938
ENSG00000117528	P28288	ABCD3	1	0.258103	0.146913	-0.409663	0.10768	-0.119482	-0.0620331	0.100021	0.149803	0.298407	0.349096	0.00473723	-0.309112	0.383783	0.074728	0.0938088	-0.0413127	-0.424558	-0.0399724	-0.304233	-0.41116	0.10775	-0.0376026	0.0968575	-0.0125583
ENSG00000117533	O75379	VAMP4	8	-0.357845	-0.564663	-0.0377475	-0.400422	0.0139051	0.184039	0.332216	0.0870974	-0.0733109	0.461974	0.0679065	0.135698	-0.0615026	0.509157	-0.294067	0.179294	0.0709115	0.0944058	-0.0185167	-0.0279626	-0.517406	-0.0229832	-0.127614	0.367436
ENSG00000117569	Q9UKA9	PTBP2	9	0.226796	-0.0374841	0.268589	-0.1713	0.257658	0.106188	-0.162762	-0.18778	-0.0163176	-0.0907958	-0.0608898	0.0446158	-0.0212737	-0.0534858	-0.00122653	0.34381	-0.1477	0.00301688	0.0205346	0.168921	-0.1189	-0.0827848	-0.212054	-0.075376
ENSG00000117592	P30041	PRDX6	1	0.363981	-0.073717	-0.0615773	0.222071	0.387882	-0.126191	0.305261	-0.176363	0.193626	-0.166313	-0.461951	-0.407365	0.322009	-0.340401	0.0953877	0.0256001	-0.290182	-0.17383	0.0195559	-0.164462	0.44533	0.0967424	-0.237498	0.202403
ENSG00000117593	Q6PI48	DARS2	1	0.755369	0.637707	-0.283433	0.919894	-0.377994	-0.258692	0.157247	-0.353784	0.41304	-0.301143	0.0139378	-0.172733	0.6465	-0.0361277	0.416895	-0.510265	0.123436	-0.398305	0.331216	-0.31905	0.836059	-1.01417	-0.265151	-0.960458
ENSG00000117625	Q9P2K3	RCOR3	2	0.287962	0.0234544	0.369987	-0.167821	0.102048	0.106654	-0.00733155	-0.390095	-0.169365	-0.111519	0.366248	0.303318	0.0258039	-0.350319	0.0531322	-0.0192978	0.312677	-0.115826	0.0737001	0.0272828	-0.0992256	-0.338895	-0.110242	-0.172331
ENSG00000117632	P16949	STMN1	9	0.132734	0.320634	0.386659	-0.155384	0.63582	0.299702	-0.224524	-0.0482582	-0.215051	0.09751	-0.219031	0.33135	-0.267861	0.113483	0.046434	-0.102112	-0.278725	0.0204537	-0.216681	-0.155143	-0.0715976	0.109811	-0.570942	0.0307187
ENSG00000117640	Q9H019	MTFR1L	9	-0.162418	-0.0678804	0.100472	-0.205758	0.34319	0.182581	0.0807742	0.164661	0.013138	0.229348	-0.213382	-0.0452352	-0.00768803	0.239386	-0.195497	0.0899201	-0.105741	0.117084	-0.318606	-0.00545044	-0.148889	0.0463257	-0.238013	0.10768
ENSG00000117676	Q15418	RPS6KA1	4	0.359297	0.502342	-1.23189	0.983231	0.106027	-0.449071	0.332305	0.576158	0.182721	-0.159285	-0.463994	-1.01041	0.863054	0.512052	0.421135	-0.203917	0.358145	-0.156991	0.170544	-0.286241	-0.168861	-0.370692	-0.0908011	-0.774858
ENSG00000117691	Q9UMX5	NENF	3	0.276614	0.561459	0.00807272	0.135481	-0.150395	-0.513874	0.298264	0.530741	-0.503767	-0.0225735	0.100402	-0.261017	0.534889	-0.462777	-0.324864	-0.0570744	-0.454802	0.701093	0.0138977	-0.00660976	0.248917	-0.63309	0.302035	-0.32102
ENSG00000117697	Q96IY1	NSL1	1	0.17607	0.00815801	-0.613312	0.495333	-0.378066	-0.143659	0.369731	-0.46415	0.273671	-0.21144	0.027446	-0.491875	0.407998	-0.313895	0.3335	-0.102632	-0.111497	-0.337326	0.381062	-0.0105896	0.547311	0.360205	-0.0945004	-0.10754
ENSG00000117713	O14497	ARID1A	1	-0.0712739	0.0330676	0.0726006	0.0968773	0.0602103	-0.023753	0.0609919	0.156056	0.00870418	0.121419	0.00423774	-0.0811293	0.113975	0.208558	0.0246833	-0.0468117	-0.057131	-0.0673984	0.0800724	-0.119304	-0.0477279	-0.273904	-0.0796649	-0.173355
ENSG00000117724	P49454	CENPF	1	0.5647	-0.0593874	0.522462	0.3144	-1.90201	0.206122	-0.00509722	1.15469	-0.27626	-1.07066	-0.504155	0.119041	-0.0293612	-0.214104	-0.469748	0.252479	0.129077	0.22251	0.0296467	-0.221091	0.415773	0.332651	0.450724	0.0375921
ENSG00000117748	P15927	RPA2	1	0.121707	0.293423	-0.475771	0.230795	-0.0542384	0.399296	0.315382	0.0931429	0.274746	-0.144422	-0.186379	0.0266096	0.210386	0.588474	0.00174841	0.142296	-0.262761	-0.164722	0.147273	-0.169774	-0.204005	-0.193269	-0.626607	-0.36333
ENSG00000117758	Q86Y82	STX12	9	-0.62464	-0.631199	0.803704	-0.375173	0.647606	0.707305	-0.445768	0.667199	-0.0048492	0.871748	-0.603611	0.206481	-0.301828	0.618243	-0.321849	0.309295	-0.301251	0.171145	-0.126093	-0.225618	-0.210543	-0.441866	-0.139867	-0.24857
ENSG00000117791	Q969Z3	MTARC2	2	-0.289665	0.014563	-0.110102	-0.0582763	-0.0673997	0.147674	-0.144825	-0.360836	-0.0645582	0.138701	0.208319	-0.0318046	-0.458914	0.457783	0.398597	-0.219886	-0.0575354	0.0948541	0.141418	0.0786709	0.359473	-0.0050782	-0.0693729	-0.101799
ENSG00000117862	O95881	TXNDC12	1	0.199169	0.272004	-0.220126	0.28969	-0.18748	-0.506939	0.250873	-0.310863	0.214445	-0.146799	-0.0888652	0.0148491	0.321428	-0.27985	0.015795	-0.348803	0.231497	-0.0570857	0.102922	-0.252144	0.268978	-0.131207	0.255429	0.0930846
ENSG00000117868	A0FGR8	ESYT2	5	-0.231696	-0.382393	-0.398987	-0.060918	-0.368171	-0.450109	0.0251006	-0.181239	0.0375685	-0.056331	0.0417442	0.0549212	0.165023	-0.126184	0.0843558	0.419291	-0.0797647	0.0566874	0.325042	0.444956	0.101145	0.335088	-0.000184108	0.245055
ENSG00000117899	Q14696	MESD	1	0.637107	0.612713	-0.631584	0.227221	-0.366844	-0.433414	0.269911	-0.459323	0.292418	-0.100118	0.312698	-0.282971	0.484558	-0.310104	0.523098	-0.24642	0.420171	-0.281667	0.0148974	-0.344611	0.334271	-0.478522	0.140968	-0.334452
ENSG00000117906	Q14257	RCN2	4	0.333253	0.247527	-0.0745209	0.0889011	0.0241458	-0.124327	0.402416	-0.214898	0.212287	-0.322756	0.0462319	-0.309979	0.314274	-0.278675	0.174762	-0.327749	0.0303097	-0.365753	0.355918	-0.16576	0.290757	-0.254197	0.177928	-0.260094
ENSG00000118007	Q8WVM7	STAG1	2	0.150822	-0.476707	-0.0231927	-0.0924551	0.00645924	-0.127836	-0.0717995	-0.167923	-0.0723267	-0.395882	0.433808	0.230868	0.13751	-0.214668	-0.264222	-0.422849	0.219537	-0.0953358	0.191882	-0.0327243	0.40484	0.124553	0.475049	0.0825908
ENSG00000118058	Q03164	KMT2A	5	-0.195928	-0.218735	0.0826599	-0.0203929	-0.117904	-0.318037	-0.308139	-0.112034	-0.130117	-0.244656	0.217693	0.382023	0.180022	-0.117391	-0.0879196	-0.0266522	0.110072	0.0933615	-0.0391735	0.16935	0.0525253	0.436608	-0.0219739	0.234737
ENSG00000118181	P62851	RPS25	3	0.405782	0.519709	-0.380799	0.0459833	-0.391611	-0.507677	0.255097	0.202198	0.271497	0.397564	-0.055189	0.0279226	0.285213	0.15783	-0.0503622	-0.386341	-0.0903389	0.0306922	0.0834298	-0.453788	0.171044	-0.365222	0.0257296	-0.198364
ENSG00000118197	Q5T1V6	DDX59	2	0.0152359	0.196845	-0.234921	-0.0978049	-0.165391	0.000999829	-0.184814	-0.0723564	0.441306	0.0243113	0.142918	-0.449084	-0.226862	0.335753	0.178171	-0.0123205	0.306547	0.0721953	-0.216127	0.063493	-0.124721	-0.049783	0.0482986	0.00811037
ENSG00000118200	Q08AD1	CAMSAP2	9	-0.428789	-0.4155	0.464957	0.0340317	0.274406	0.141466	-0.307612	0.283714	-0.0430589	0.273419	0.0639182	0.440892	-0.0445145	0.315628	0.0852082	-0.197513	-0.308939	-0.174374	0.197823	0.110083	-0.242149	-0.311098	-0.125439	-0.0865593
ENSG00000118257	O60462	NRP2	7	-0.564548	0.403906	0.0754548	-0.0353935	-0.1087	-0.0315417	0.189079	0.0890048	0.223344	-0.726871	0.641324	0.726757	0.154123	0.221674	0.0588167	-0.673988	0.148465	0.444238	-0.0973121	0.764448	-0.454211	-0.245564	-0.717499	-0.485006
ENSG00000118298	Q9ULX7	CA14	2	1.40894	1.62457	-1.37388	1.79948	-0.00268855	-0.687293	0.882217	-1.5317	1.23285	-0.461225	0.381929	-0.82164	1.76683	-1.23957	-0.0958786	-0.599779	0.974644	-1.45345	0.645693	-0.793547	0.191944	-0.475143	-0.124437	-1.24887
ENSG00000118402	Q9GZR5	ELOVL4	9	0.0800318	-0.577196	0.255027	-0.0118232	0.136184	-0.212062	0.0125644	0.0486507	0.01402	0.100968	-0.421372	0.124089	0.837865	0.05686	-0.544614	0.159639	-0.343299	0.434843	-0.106984	-0.244705	-0.0635265	-0.0659651	0.00240552	0.328399
ENSG00000118418	Q15651	HMGN3	1	0.1245	0.114286	0.0319371	-0.191339	-0.152169	0.0771794	0.184026	-0.0193462	0.157277	-0.078552	-0.512471	-0.185515	0.213311	0.0132163	0.160402	0.202621	-0.453286	-0.152644	0.190725	0.255537	0.21114	0.429111	-0.564922	-0.0550244
ENSG00000118680	O14950	MYL12B	5	-0.660493	-0.307358	-0.0404407	-0.322901	-0.00462672	-0.153131	-0.109592	0.327453	-0.310231	0.425525	-0.621035	0.380904	-0.360266	0.323322	-0.2583	0.240902	-0.269761	0.377082	0.115325	0.272196	0.275756	0.227123	0.0912534	0.361292
ENSG00000118689	O43524	FOXO3	5	-0.806861	-0.644906	-0.408866	-0.482355	-0.199348	-0.335769	-0.0371559	0.556884	-0.163012	0.323571	-0.0013591	0.433092	-0.401375	-0.128611	-0.0141939	0.17525	-0.119965	0.450772	0.324358	0.275466	0.0691609	0.437125	0.204768	0.493329
ENSG00000118705	P04844	RPN2	1	0.114794	0.125037	0.0639589	0.239315	-0.119968	-0.0248008	0.329498	0.283447	0.182891	0.306176	0.000569587	-0.320369	0.329104	0.259692	0.118533	-0.296164	0.0450708	-0.277787	-0.147211	-0.344818	-0.0845454	-0.526949	0.113713	-0.369186
ENSG00000118939	P15374	UCHL3	7	0.195573	-0.0486813	0.286702	0.360512	0.0904276	0.22609	0.0799886	0.315321	0.115055	0.300595	-0.429518	0.328137	0.0964621	0.591415	-0.645254	0.327756	-0.517181	0.0559556	-0.41728	-0.307598	-0.348254	-0.340377	-0.0673235	-0.248526
ENSG00000118965	Q9P2L0	WDR35	1	-0.137966	-0.137098	-0.011522	-0.0551591	-0.339672	-0.474362	0.0356521	0.408612	-0.000424625	0.276278	0.0871088	0.00709071	-0.102551	0.407872	-0.033498	-0.531706	-0.123878	-0.0926707	0.397682	0.0959223	0.392294	-0.37032	0.239759	0.0625561
ENSG00000119004	Q6UW02	CYP20A1	2	-0.63193	0.219485	-0.413735	0.695943	-0.374105	0.0727093	-0.00545024	-0.317985	0.228932	-0.65814	-0.00367959	0.588694	0.047199	-0.730654	0.314655	0.469105	0.0105839	0.337811	-0.0755566	-0.577785	0.657055	0.589107	-0.0153209	-0.426937
ENSG00000119041	Q9Y5Q9	GTF3C3	1	-0.0507282	0.154311	0.076474	-0.0367659	0.222907	0.136495	0.261855	-0.240546	-0.0780359	0.100969	0.0982904	0.0507204	0.069354	0.0094061	0.136791	-0.0372758	0.15196	0.108694	-0.178051	-0.325384	-0.156977	-0.367727	0.00443387	-0.111171
ENSG00000119042	Q9UPW6	SATB2	6	0.179521	0.419857	-0.793742	-0.0519427	-0.185354	0.0570812	-0.114959	-0.372522	0.493171	-0.409121	0.177039	0.308102	0.531032	-0.715883	0.42763	0.112807	0.0915346	0.0518811	-0.0760363	-0.057764	-0.00346188	0.212706	-0.273835	-0.00774313
ENSG00000119203	Q9UKF6	CPSF3	1	0.375841	0.169469	0.441088	0.474966	-0.303277	-0.406296	0.471033	-0.112293	0.258836	-0.0193406	-0.450525	-0.200664	0.561482	0.112516	-0.223722	-0.259125	-0.160171	-0.502247	0.494835	-0.618462	0.454182	0.0362378	-0.0186399	-0.575724
ENSG00000119242	Q53HC0	CCDC92	9	-0.285842	-0.17616	-0.310023	-0.27453	-0.152226	-0.0137758	0.161648	0.180063	0.143548	0.28717	-0.221935	0.0690353	-0.159051	-0.0326725	-0.0299444	0.251766	0.0614041	0.154045	-0.0182897	0.00166712	0.0456299	0.105516	0.0030214	0.209935
ENSG00000119280	Q9H425	C1orf198	2	0.699595	0.43827	-0.655535	0.0645318	-0.183817	-0.125296	0.113545	-0.4442	0.575145	0.133565	-0.15038	0.273812	-0.10262	-0.490992	0.299271	0.00599631	0.118638	0.138967	-0.23346	-0.00549754	-0.0569631	0.0859239	-0.396933	-0.101565
ENSG00000119285	Q9H583	HEATR1	3	0.384343	0.222483	-0.0965911	0.333195	-0.339847	-0.400571	0.107642	-0.360015	0.0119704	-0.362745	0.208063	0.12833	0.22892	-0.144518	-0.0647375	-0.270803	0.0800218	-0.116358	0.164617	-0.00537038	0.0730889	-0.0607051	0.197658	0.0819291
ENSG00000119314	O95758	PTBP3	8	-0.108071	-0.31097	0.565039	0.255881	0.632556	0.187847	-0.268851	0.447203	0.0171366	0.205051	-0.0679297	0.0570237	0.464622	0.32531	-0.146051	0.0938999	-0.197829	-0.360736	0.199315	-0.311148	-0.152569	-0.778015	-0.18648	-0.562234
ENSG00000119318	P54727	RAD23B	3	0.236308	0.0709066	0.0323072	0.165711	-0.139924	-0.0731093	0.141224	0.18021	0.219544	0.212871	-0.188396	0.187903	0.195165	0.177331	0.0159035	-0.0542016	-0.33643	0.0388706	-0.246529	-0.145904	-0.262091	-0.151779	-0.287688	0.0117955
ENSG00000119396	P61106	RAB14	8	-0.35365	-0.11994	0.268572	-0.449674	0.0411582	-0.0146468	0.119305	0.406409	-0.137825	0.33475	-0.269197	-0.141827	-0.0179702	0.088762	-0.0731904	0.33956	-0.0271156	0.217403	-0.202717	-0.138669	-0.0597017	0.0638006	-0.131939	0.258345
ENSG00000119414	O00743	PPP6C	5	0.00777757	-0.440201	-0.197613	-0.24341	0.163547	-0.132115	-0.177234	-0.10477	-0.0160293	0.109064	0.206211	0.142708	-0.18939	0.131076	-0.0931614	-0.0327431	-0.0389512	-0.00560569	0.248886	0.073412	0.104437	-0.0988597	0.199857	0.383108
ENSG00000119421	P51970	NDUFA8	7	-0.556403	-0.0175051	0.584038	-0.136709	0.0455978	0.160625	0.00786316	0.212652	0.355747	0.232876	-0.143089	0.0796071	0.195546	0.581624	0.149134	0.463831	-0.586164	-0.13428	-0.0826915	-0.260479	-0.163159	-0.00706246	-0.462098	-0.519502
ENSG00000119446	Q96H35	RBM18	8	-0.355987	0.187165	0.132498	-0.364871	0.348138	0.181413	-0.161132	0.086751	-0.0129247	0.238614	0.0650592	0.287372	-0.180516	0.191394	-0.131616	0.0538265	0.259875	0.0801802	-0.251105	-0.0156595	-0.212638	-0.164549	-0.173268	-0.0880212
ENSG00000119471	Q6YN16	HSDL2	1	0.317262	0.289179	-0.556277	0.00261268	-1.4828	-1.39394	0.252651	0.948634	0.648453	1.09907	0.19052	0.206032	0.0143015	0.673322	1.02011	-0.508594	0.540816	0.470178	-0.475519	-0.987429	0.435137	-0.949384	-0.272554	-0.481781
ENSG00000119541	O75351	VPS4B	5	-0.00792714	-0.256927	-0.205991	-0.311614	-0.180424	-0.244179	0.103026	-0.126934	0.00640938	-0.159781	-0.123622	-0.0278157	0.107578	-0.0363553	0.0870523	0.219107	0.237599	-0.0760676	0.205783	0.233904	0.203616	0.15182	0.0292855	0.172456
ENSG00000119638	Q8TD19	NEK9	1	0.393716	0.388828	-0.515644	0.683807	-0.14801	-0.380311	0.478567	-0.548792	0.190243	-0.512358	0.368871	-0.205058	0.672725	-0.496098	0.361818	0.266219	0.162835	-0.59765	0.458682	-0.274	0.310297	-0.0807597	-0.186287	-0.791639
ENSG00000119655	P61916	NPC2	3	0.953882	0.989254	-0.781077	1.31093	-0.909692	-0.52023	1.20581	-0.09769	1.04216	-0.130711	-0.0313758	-0.781949	0.852613	-0.588541	0.66057	-0.204539	-0.362394	-0.577244	-0.13851	-0.641226	0.153979	-0.528277	-0.0983789	-0.777368
ENSG00000119689	P36957	DLST	6	-0.0798024	-0.0206335	-0.269124	-0.107399	-0.13418	-0.177593	-0.0409716	0.0722507	0.0391635	0.114368	-0.0396534	0.076588	-0.0138999	0.0433023	0.0828969	0.0234146	0.143647	0.213001	-0.167961	-0.0390095	0.0372716	0.090026	-0.0319194	0.186218
ENSG00000119711	Q02252	ALDH6A1	1	0.456828	0.352117	-0.711616	0.694194	-1.15332	-1.27239	1.15067	-0.0484012	0.696154	-0.333503	0.975387	-0.660724	0.541944	0.0253552	0.690904	-0.950019	1.21563	-0.702149	0.170623	-0.789263	0.159832	-0.640672	0.63619	-0.503772
ENSG00000119718	P49770	EIF2B2	9	0.185067	-0.107968	-0.0739386	-0.00329729	-0.0199795	0.0901265	-0.0562807	0.0384349	-0.439317	-0.0421261	0.0730522	0.372788	-0.0477319	0.0829283	-0.278776	0.135255	0.0567818	0.173209	-0.377666	-0.0494938	0.0182637	-0.0125272	0.125019	0.158177
ENSG00000119771	Q96CT2	KLHL29	9	-0.231751	-0.206572	-0.297581	-0.117581	-0.0617058	0.139539	0.198603	0.177226	-0.115357	0.468546	-0.0829627	0.0522375	-0.406576	0.183156	0.291109	-0.0577938	-0.0614616	0.24516	0.293525	0.16803	-0.222052	-0.266947	-0.350359	0.261569
ENSG00000119772	Q9Y6K1	DNMT3A	4	-0.0763524	-0.0390211	-0.100633	0.181436	0.111711	-0.00096055	0.0715059	0.0863062	-0.0103127	-0.112339	0.000901183	0.238956	-0.0400892	-0.132808	-0.0451557	-0.107977	0.149951	-0.00956563	0.0504456	0.126972	-0.154297	-0.13579	-0.137382	0.0844981
ENSG00000119777	Q6NUQ4	TMEM214	5	0.570792	0.548465	-0.161648	0.477029	-0.0667894	-0.0689526	-0.166764	-0.548076	0.206625	-0.301128	0.0796995	-0.39885	0.21388	-0.308057	0.0405259	-0.097406	0.434016	-0.109662	0.0349469	-0.198659	-0.0643874	-0.3324	0.322341	-0.105542
ENSG00000119801	P62699	YPEL5	8	-0.408931	-0.493116	0.0638697	-0.546105	0.213923	0.170737	-0.14654	0.371859	-0.0618219	0.359869	-0.140549	0.209631	-0.318498	0.183737	-0.165147	0.38189	-0.088537	0.270219	-0.222231	0.106696	-0.325989	0.342391	-0.0325394	0.275183
ENSG00000119866	Q9H165	BCL11A	7	-0.563436	-0.443783	0.0192451	-0.540925	0.0524951	0.123503	-0.141077	-0.0871335	0.0189862	0.0916969	0.190433	0.467713	-0.280707	0.150989	-0.247438	0.212162	-0.215973	0.0609791	-0.0314649	0.16953	0.0271882	0.639066	-0.0289308	0.356883
ENSG00000119912	P14735	IDE	2	0.532131	0.134226	-0.163635	0.479161	-0.474192	-0.320574	0.279652	-0.417356	0.396688	-0.145532	0.327177	-0.305502	0.172761	-0.398092	0.174228	-0.205279	0.501209	-0.450671	0.20913	-0.412897	0.0613321	-0.0839425	0.511024	-0.401048
ENSG00000119969	Q9NRZ9	HELLS	1	0.109492	-0.297191	-0.27761	-0.249467	0.101933	-0.0381166	0.0842172	-0.346965	0.144422	-0.262205	0.167774	0.346154	0.269824	-0.120526	-0.125665	0.394945	0.109254	-0.551796	-0.165973	0.380687	0.165525	0.300859	0.00552369	-0.145095
ENSG00000120008	Q9BZH6	WDR11	5	0.0222512	0.00556798	-0.113925	-0.114375	0.102734	0.0617786	-0.176441	0.103805	-0.0178438	0.0997683	-0.0919118	-0.0306226	-0.0448126	-0.00533822	-0.0767846	0.112776	0.0606237	0.10883	-0.0246333	-0.0191939	-0.0320305	0.00651189	0.106011	-0.0427449
ENSG00000120063	Q14344	GNA13	8	0.0947994	-0.346696	0.203825	-0.140444	-0.132371	-0.512991	-0.485923	0.444143	-0.085631	0.11635	0.465649	0.132451	0.0428364	0.179265	-0.0939556	0.16827	0.234988	-0.0899976	-0.0366421	0.351922	-0.133523	-0.0829414	0.238255	-0.531638
ENSG00000120158	Q9Y2P8	RCL1	3	0.37296	-0.225726	0.107741	-0.0312668	-0.799817	-0.51019	0.156002	0.170493	0.274352	0.159855	0.392674	0.101838	0.0429234	0.224199	-0.236268	-0.184252	-0.349747	0.0213516	-0.334197	0.0333549	0.259225	0.414754	-0.111203	0.0509456
ENSG00000120159	Q9H8G2	CAAP1	1	-0.113755	0.0541132	0.140653	-0.0482412	-0.125966	-0.150585	-0.134788	0.104653	0.239173	-0.285049	0.24248	-0.0594618	0.217214	0.0829056	0.00112838	0.0502604	0.182074	0.0327679	0.407015	-0.0186013	-0.105619	-0.26069	-0.191196	-0.260484
ENSG00000120251	P42262	GRIA2	8	-0.151345	-0.331993	-0.057624	-0.13757	0.0430864	-0.0185965	0.265794	0.047483	-0.0679572	-0.00533484	0.0139088	0.0120926	0.507118	-0.026454	-0.153403	0.0135073	-0.0196679	-0.12543	-0.0296108	-0.0259506	0.118058	0.0710024	0.0645299	-0.005643
ENSG00000120253	Q8NFH3	NUP43	1	0.0757802	0.423584	-0.400146	-0.108205	-0.107991	0.238979	0.0336131	-0.0997239	-0.0905312	0.089166	0.030163	-0.087007	0.0790737	-0.159144	0.0889388	0.0488392	0.0339157	-0.127565	-0.0852293	-0.259432	0.0892211	0.345576	-0.089612	0.0377384
ENSG00000120254	Q6UB35	MTHFD1L	3	-0.0262298	0.27394	-0.815426	-0.203015	-0.59128	-0.0834998	-0.238511	-0.163896	0.305313	0.346925	-0.0313595	0.460243	0.0259891	-0.191408	-0.323626	0.648325	0.05407	0.532571	-0.260061	-0.126108	-0.18297	-0.206219	0.107791	0.688441
ENSG00000120334	Q8N0S6	CENPL	1	0.109061	-0.158434	0.368602	0.182726	-0.280276	-0.269618	-0.0331879	-0.104551	0.0445891	0.234758	0.110685	0.347709	0.122932	0.210139	0.214809	-0.299863	-0.527618	-0.230407	0.288987	-0.254725	0.398009	-0.122267	0.117545	-0.469605
ENSG00000120437	Q9BWD1	ACAT2	7	0.103024	0.304206	0.474629	-0.144215	-0.210139	-0.275188	-0.127747	0.290561	-0.0512937	0.34239	-0.440712	-0.332261	-0.0553035	0.528855	-0.294322	0.1638	-0.536823	0.0897602	-0.35426	0.180151	0.230582	0.277262	-0.259219	0.0962645
ENSG00000120438	P17987	TCP1	9	-0.212053	-0.031363	-0.0731549	-0.374716	-0.254083	-0.0801526	-0.115328	0.236735	0.0811773	0.304205	-0.106987	0.181764	-0.0701912	0.305565	-0.115032	0.158574	-0.0622652	0.316185	-0.180437	-0.102394	-0.170483	0.0368419	0.0640994	0.263493
ENSG00000120526	Q96RS6	NUDCD1	1	0.186861	0.554633	-0.104872	0.325157	-0.36666	-0.229658	0.479666	0.0713204	0.167994	-0.42391	-0.0540687	-0.114901	0.348175	-0.236073	0.0161969	-0.514232	-0.0972088	-0.195445	-0.112337	0.0642325	0.087651	0.0781764	-0.245579	0.314882
ENSG00000120533	Q9NPA8	ENY2	3	0.146682	-0.0133273	-0.0473487	0.017298	-0.129432	-0.210863	0.182286	-0.0807229	0.384205	-0.0585062	-0.453808	0.0183269	0.36854	-0.0782756	0.0782753	0.0749133	-0.0901813	-0.0520459	0.0927823	0.165527	-0.111973	0.0856011	-0.288641	0.000690047
ENSG00000120549	Q5T5P2	KIAA1217	1	0.60506	0.252198	0.701027	0.383458	0.967833	0.346119	-0.519175	0.490073	-0.0938938	-0.700723	0.485195	-0.617193	-0.0782967	0.293397	-0.0929705	0.212956	-0.454577	-0.679416	-0.516422	-0.023083	-0.0637379	-0.154158	0.210509	-0.954179
ENSG00000120616	Q9H2F5	EPC1	8	-0.398092	-0.567392	0.123918	-0.379433	0.690846	0.274371	-0.38356	0.292648	-0.311505	0.397144	0.147338	0.541901	-0.431414	0.29643	-0.232916	0.293646	-0.265057	0.0693833	-0.120906	0.173362	-0.323091	0.0234852	-0.0396788	0.128571
ENSG00000120658	Q8TC92	ENOX1	9	-0.486959	-0.202244	0.0764247	-0.0134142	0.00764481	-0.0183165	0.0662725	0.319183	0.40947	0.152795	0.105278	0.0211186	0.0461261	0.164561	-0.220504	-0.0887894	0.0798173	-0.180384	-0.0427914	-0.148914	-0.0164746	0.00293384	0.0955202	-0.128354
ENSG00000120685	Q86XN7	PROSER1	2	-0.00533982	-0.126217	-0.188981	0.0263738	-0.363297	-0.199878	0.203277	0.00214729	0.349447	0.0100853	0.23843	-0.0304578	0.284418	0.0313813	-0.0563436	-0.0302933	0.258758	-0.0578676	0.0901572	-0.277365	0.00336826	-0.0737697	-0.0146835	-0.0733507
ENSG00000120688	O75554	WBP4	3	0.0919554	0.211616	-0.0407796	-0.080142	-0.0337928	-0.150711	-0.0178354	0.088791	0.104811	-0.149498	-0.269326	-0.123984	0.1426	0.119625	0.0396398	0.0196505	0.204697	-0.0303446	-0.153943	-0.142503	0.132263	0.195091	-0.103735	-0.0541446
ENSG00000120705	P62495	ETF1	3	0.299428	0.0106132	0.139046	-0.0525431	-0.169858	-0.332058	0.136247	-0.154142	0.132687	-0.107692	-0.059446	-0.000190326	0.0730272	0.114354	-0.0316499	-0.186636	-0.0612097	0.0402598	0.0588863	0.0145281	0.139261	-0.441779	0.190949	0.247919
ENSG00000120733	Q7LBC6	KDM3B	1	0.0253282	0.162424	-0.0809261	0.229725	-0.140663	-0.0647171	0.113883	-0.161943	0.200038	0.0342451	0.149558	0.00483197	0.0808723	0.0472531	-0.00933435	-0.205274	-0.151967	-0.392923	0.315236	0.0640604	-0.0348542	-0.0381999	-0.00475057	-0.141904
ENSG00000120800	O75691	UTP20	1	0.483416	-0.0911098	-0.0189673	0.609724	-0.630753	-0.580955	0.389637	-0.138428	-0.0338134	-0.0705947	-0.0632957	-0.131812	0.592914	0.120151	0.187681	-0.0957009	-0.308651	-0.695208	0.678811	0.0148364	0.172334	0.0449476	-0.0811981	-0.353966
ENSG00000120802	P42166	TMPO	1	0.0774089	0.513961	0.55977	0.225398	-0.0837538	0.54176	-0.203227	-0.679982	-0.0602646	-0.178152	0.0674744	-0.659995	-0.468292	-0.136033	0.0883339	-0.236955	-0.0223567	-0.06663	0.337458	-0.547174	0.107589	0.122822	0.284239	0.4166
ENSG00000120805	P40616	ARL1	1	0.156132	0.441857	0.0345188	-0.0659605	-0.401437	-0.561867	0.0832876	-0.275887	0.00990657	0.0168445	0.267831	-0.0713807	0.316208	-0.282287	0.250925	-0.296296	0.584707	-0.106848	0.0246378	-0.218871	0.0651989	-0.104732	0.12529	0.00822271
ENSG00000120837	P25208	NFYB	1	0.073932	-0.0661331	-0.197448	-0.122663	-0.198237	-0.108737	0.0485025	-0.0816663	-0.0557102	0.135331	-0.0889288	0.0680865	0.0767778	0.0388684	-0.0389712	0.0635787	-0.131607	0.0892725	-0.0786762	0.0344671	0.0747665	0.392871	-0.109592	0.181915
ENSG00000120885	P10909	CLU	1	-0.255442	-0.923594	0.502499	0.238524	-0.209977	0.0963154	0.393301	0.161951	0.182736	0.0653687	-0.252741	-0.660037	0.430514	-0.457345	0.520509	-0.228935	0.157496	-0.0741791	-0.0503775	0.230411	0.136776	0.119897	0.397824	-0.521496
ENSG00000120896	O60504	SORBS3	3	0.169035	1.02455	0.125633	0.372643	-0.736524	-0.631797	-0.0399346	-0.0863258	0.044023	-0.158041	0.137669	0.0264392	0.162332	0.441795	-0.173128	-0.149978	-0.122908	0.0449213	-0.675623	0.521011	0.0338001	-0.526675	0.0711125	0.125974
ENSG00000120948	Q13148	TARDBP	3	0.315198	-0.116907	-0.114753	0.172571	-0.0935398	-0.183572	0.291176	-0.118528	0.0764541	-0.137281	-0.084991	-0.0888424	0.249459	0.013906	0.0740644	0.0393457	-0.0897534	-0.135737	0.110827	-0.063187	0.203208	-0.14362	-0.135485	-0.0400132
ENSG00000120963	Q9Y5V0	ZNF706	5	0.042275	0.244604	-0.239615	0.0132083	0.218275	0.00219257	0.465448	-0.193307	0.147806	-0.169762	-0.279937	0.27928	0.512775	-0.257652	-0.0517593	0.13882	-0.00733822	-0.0243223	-0.348026	-0.213197	-0.162112	0.0418755	-0.21693	0.0573963
ENSG00000120992	O75608	LYPLA1	4	0.453161	0.471242	0.143111	0.462063	-0.19671	0.601914	0.604833	0.382722	0.459682	0.0128547	0.195979	-0.433766	0.651963	0.00169516	-0.066975	-0.836427	-0.264609	-0.305252	0.0636019	-0.650487	-0.414069	-0.314096	-0.263228	-0.759204
ENSG00000121022	Q92905	COPS5	9	-0.0495164	0.097076	-0.048237	-0.103814	-0.0316126	0.0696705	0.0327676	0.387774	-0.047281	0.269909	-0.247987	-0.262389	-0.0725874	0.34578	0.0866882	0.248426	-0.228453	0.058864	-0.175211	-0.173234	-0.0860382	0.0718414	-0.131229	-0.0112081
ENSG00000121039	Q8IZV5	RDH10	1	0.0561546	0.164924	0.845792	0.254728	0.0561074	-0.174276	0.586529	-0.807782	0.557845	0.148188	-0.700581	-0.936162	0.208532	-0.66302	-0.291289	0.126328	0.417329	0.171224	-0.173746	-0.24837	0.319611	-0.1994	-0.0524683	0.333803
ENSG00000121057	Q92667	AKAP1	9	0.0373058	0.253292	0.0569583	0.212177	0.0612709	0.125614	-0.0237839	-0.13901	0.0572956	-0.202592	-0.111923	0.214374	0.0558659	-0.09814	0.0902572	0.0296583	0.0611306	-0.0203448	-0.277198	-0.12928	-0.243659	0.109275	-0.328953	0.210408
ENSG00000121058	P38432	COIL	9	0.0385361	-0.0578475	0.144083	-0.0342275	0.288091	-0.0740098	-0.0494389	0.124205	-0.327581	0.0255566	-0.21181	0.0284289	-0.222911	-0.0819764	-0.21654	0.0165452	-0.0324993	0.135637	-0.113418	0.235275	-0.0314515	0.1678	0.0576702	0.191882
ENSG00000121060	Q14258	TRIM25	1	-0.117852	0.252339	-0.290105	-0.430417	-0.888658	-0.922589	0.966079	-0.241062	-0.336039	-0.635479	0.68675	-0.910489	0.989658	-0.548615	0.274188	0.0334019	0.79105	0.326593	-0.457265	-0.491934	0.728508	0.313034	0.680811	0.228095
ENSG00000121152	Q15003	NCAPH	1	-0.11418	0.531508	-0.339473	0.0805238	-0.81366	-0.0405335	-0.129953	0.230543	0.449841	-0.514299	-0.132442	0.206164	-0.286158	0.826285	-0.455152	-0.101871	0.659818	0.124333	-0.221593	-0.529372	-0.0341714	0.162719	0.702805	-0.261683
ENSG00000121210	A2VDJ0	TMEM131L	2	0.373729	-0.0936495	0.368032	0.309327	-0.0371534	0.0538054	0.24076	-0.0953209	-0.0171641	-0.452339	-0.0894641	-0.0367136	0.0928574	-0.107385	-0.0025971	-0.0793147	-0.22158	-0.0307941	-0.0711526	-0.0365096	-0.161356	0.0255784	0.0945564	-0.0261514
ENSG00000121211	Q9BWT6	MND1	1	0.302689	0.335376	0.00378399	0.0347388	0.339602	-0.79203	0.043821	0.371574	0.142575	-0.0383786	0.119793	-0.388036	-0.585265	-0.0300229	0.10788	-0.874664	-0.0921592	-0.282397	0.162372	0.0865941	0.434056	-0.313903	0.373895	0.538107
ENSG00000121579	Q9GZZ1	NAA50	1	0.175635	0.173794	-0.260719	0.249164	-0.598437	-0.478013	0.0366493	-0.298763	-0.0438479	-0.29727	0.109183	0.137641	0.145124	-0.236437	0.0416603	-0.0739215	0.18854	-0.0461962	0.265212	0.0889215	0.297435	0.131855	0.158732	0.134059
ENSG00000121653	Q9UQF2	MAPK8IP1	4	-0.115372	-0.272602	0.101473	0.382097	-0.22574	0.0495376	0.548598	0.356468	0.322045	0.194192	0.120651	-0.156961	0.2713	0.0745128	0.0320364	-0.161008	-0.270071	0.0698306	-0.382065	-0.12009	-0.0944406	-0.324854	-0.327626	-0.0719093
ENSG00000121741	Q9UBW7	ZMYM2	4	0.185899	-0.0569968	0.263983	-0.0747018	0.247626	0.134811	-0.0590191	0.0864045	-0.0822681	-0.054902	0.181062	0.06859	-0.118576	-0.0462311	-0.0865087	-0.103632	0.0407561	-0.256906	-0.117011	-0.13053	0.0282408	-0.04607	-0.109948	0.105929
ENSG00000121749	Q8TC07	TBC1D15	1	0.383545	0.0182443	0.159105	0.14741	-0.235129	-0.316321	0.116755	-0.362651	0.10281	-0.271479	0.189892	-0.0362161	0.164883	-0.185652	0.246493	-0.265659	0.211872	-0.0575922	0.252667	-0.179237	-0.0856248	-0.112294	0.175269	-0.0610919
ENSG00000121766	Q9NP64	ZCCHC17	7	0.14646	-0.000460653	0.227299	0.376373	0.0313422	0.0264978	0.366465	0.167433	0.612689	0.118922	-0.203956	-0.213007	0.21406	0.222745	-0.00479455	0.150063	-0.528454	-0.10395	-0.088138	-0.342986	-0.300165	0.0105954	-0.399461	-0.485573
ENSG00000121769	P05413	FABP3	7	-0.3221	1.06451	0.35029	-0.589052	-0.376398	0.553264	-1.03943	0.0235241	-0.660022	0.344593	-0.0931979	0.848607	-0.626315	-0.180432	-0.564713	0.802242	0.00467846	1.14358	-0.146239	-0.182994	-0.0515563	-0.46572	-0.379045	0.541922
ENSG00000121879	P42336	PIK3CA	8	-0.393963	-0.605631	-0.32473	-0.706603	0.113319	0.202601	-0.217944	0.040615	-0.389068	-0.000383131	0.0471305	0.276628	-0.19901	0.408521	-0.116138	0.212786	0.261371	0.291261	-0.170524	0.1505	0.100574	0.319053	0.263934	0.435701
ENSG00000121892	Q29RF7	PDS5A	1	0.15008	-0.169108	-0.0243029	0.0474119	-0.117272	-0.195493	0.0913245	0.12215	0.0256606	0.131705	0.00745402	0.0798443	0.0702747	0.0163094	-0.114449	-0.107119	-0.0286878	-0.190177	-0.0353694	-0.0202912	0.212491	0.0937765	0.0658183	-0.112031
ENSG00000121940	Q96S66	CLCC1	1	-0.0832189	-0.0852224	-0.0752749	0.0132115	-0.0199358	0.0924522	0.171358	0.0513055	0.0463998	-0.0269186	0.0555687	-0.318408	0.162613	0.292426	0.01103	-0.0642516	0.132281	0.0385339	-0.126143	-0.200757	0.0321395	-0.0923622	0.0842098	-0.0910364
ENSG00000121989	P27037	ACVR2A	7	0.079013	-0.0743301	0.417462	-0.0520936	0.52073	0.249369	0.0592122	-0.0624054	0.0939286	0.103138	-0.197697	-0.0322087	0.0808345	0.121603	-0.41006	0.0718754	-0.375098	0.00900887	-0.290225	-0.076954	-0.0109952	-0.0474129	-0.118345	-0.0583493
ENSG00000122034	Q92664	GTF3A	8	-0.183249	0.0466397	0.47785	-0.0277586	-0.52268	0.08364	0.266062	0.473839	0.123856	0.593987	-0.67814	0.196659	0.107144	0.546809	-0.280254	0.220445	-0.418351	0.404912	-0.630412	-0.220505	-0.198455	0.163638	-0.523982	-0.021692
ENSG00000122068	Q96QD9	FYTTD1	9	-0.192281	-0.0745992	0.237865	0.0596209	0.0324348	-0.0537522	-0.304552	-0.00137178	-0.284757	-0.0393615	0.190164	0.129759	0.365954	0.309711	-0.0687208	-0.110286	0.0214617	0.0978929	0.0535703	-0.0176857	-0.129998	-0.0950406	0.0328918	-0.158921
ENSG00000122126	Q01968	OCRL	8	-0.520833	-0.706766	-0.0577541	-0.269961	0.222215	0.0717112	-0.159848	0.0660293	-0.176654	-0.120399	0.210911	0.142238	-0.276716	0.19584	-0.0906901	-0.0346619	0.0821141	0.118368	0.171048	0.207948	0.159619	0.3395	0.268735	0.158006
ENSG00000122203	Q96A73	KIAA1191	9	-0.377372	-0.313357	0.121502	-0.173571	0.0882165	0.0150601	-0.0424272	0.405311	0.042449	0.432216	-0.328864	0.31681	-0.0098735	0.553716	-0.0186541	-0.0465927	-0.248603	0.213099	-0.277395	0.0553842	-0.178767	-0.0402413	-0.185533	-0.00251259
ENSG00000122218	P53621	COPA	6	-0.0903063	-0.012434	-0.0805159	0.190972	-0.16796	-0.280461	0.191181	0.23478	0.108735	0.0260841	0.058822	-0.203963	0.226951	0.17273	0.0468288	-0.193734	0.0927039	-0.184812	-0.0366774	-0.220125	0.0653932	0.0525448	0.0957176	-0.0924558
ENSG00000122257	Q7Z6E9	RBBP6	6	0.24411	0.282757	-0.227873	-0.127856	-0.133544	-0.0886749	0.156715	-0.248412	-0.128636	-0.287121	-0.0948621	-0.050814	0.327748	-0.126641	0.264531	0.328651	0.152588	-0.180455	0.0688162	-0.24934	0.343251	-0.0111868	-0.0365782	-0.177173
ENSG00000122299	Q8IWR0	ZC3H7A	1	-0.128911	0.202796	-0.194868	-0.07812	0.00797385	-0.088433	0.0700348	-0.133811	-0.105917	-0.0860788	0.137888	0.0735358	-0.0637531	-0.0253088	0.134023	-0.0415652	0.115099	0.0655761	-0.087019	-0.0663668	0.0544039	0.0296049	0.212918	-0.00370044
ENSG00000122378	Q9BRX8	PRXL2A	4	-0.0824204	-0.0202191	0.168183	-0.126884	-0.0786856	0.346332	0.0063336	0.196108	-0.115731	-0.075406	-0.328952	-0.0750391	-0.0205652	0.199519	0.111819	0.416396	-0.158689	0.316127	-0.0617144	-0.110311	-0.179212	-0.197247	-0.113536	-0.0162068
ENSG00000122512	P54278	PMS2	5	-0.173397	-0.425233	0.00681855	-0.0315064	0.0181493	0.299069	0.015434	-0.101373	-0.273197	0.073056	0.00927056	0.111442	0.107291	0.22078	-0.348282	0.0464332	0.0764224	0.126937	-0.123125	0.172954	-0.0890704	0.246108	0.0105074	0.0245109
ENSG00000122642	O95302	FKBP9	1	1.03599	0.576253	-0.417787	0.579859	-0.330002	-0.854137	1.06056	-0.614133	0.49597	-0.14091	0.27549	-0.936653	1.17039	-0.765158	0.476366	-0.519088	0.0878995	-0.570803	0.0363582	-0.750848	0.679242	-0.888696	0.839949	-0.526111
ENSG00000122643	Q9H0P0	NT5C3A	9	-0.0575031	-0.118204	0.486089	-0.500818	0.269093	0.267283	-0.313853	-0.160723	-0.358073	0.0847019	0.0569946	0.283875	-0.0651495	-0.0712919	-0.237866	0.0941786	-0.314871	0.264129	-0.0362065	0.069541	-0.234417	0.162225	0.129075	0.301792
ENSG00000122674	P86791	CCZ1	8	-0.331271	-0.169876	0.676135	-0.430206	-0.357594	0.173033	0.243036	0.0834605	-0.29265	0.648259	-0.182357	-0.238536	-0.0188979	0.1339	0.015595	0.402374	0.175664	0.359934	-0.265496	-0.361416	-0.177134	-0.0590711	-0.188244	0.161359
ENSG00000122705	P09496	CLTA	9	-0.249596	0.243811	0.166025	0.0601142	-0.126338	0.0813892	-0.0890913	0.301826	-0.0599374	0.022748	-0.106851	-0.0506236	-0.212727	0.188272	-0.22135	0.0588098	0.259518	-0.00355766	-0.0191029	-0.349195	-0.208209	0.064939	0.0599196	0.18921
ENSG00000122729	P21399	ACO1	1	0.322154	0.214197	0.100856	0.465907	-0.434445	-0.403145	0.405226	0.527609	0.441315	0.302845	-0.376164	-0.444933	0.636972	0.510661	0.0143453	-0.377764	-0.409043	-0.34421	0.255683	-0.444222	0.151515	-0.233117	-0.303785	-0.578457
ENSG00000122756	P26992	CNTFR	1	-0.0704141	0.708761	-0.533074	0.0776744	-0.318679	-0.0955344	0.175903	-0.0679017	0.336685	-0.036453	-0.123436	0.0605713	0.00561616	-0.316749	0.302787	0.396851	0.0234401	0.361828	-0.250817	-0.300451	-0.180004	-0.0458325	-0.0590308	-0.0517424
ENSG00000122778	Q9HCM3	KIAA1549	9	-0.21813	-0.212792	-0.0278562	0.146528	0.0116389	-0.202367	-0.0441529	-0.254596	-0.220592	-0.211591	0.332539	0.288327	0.0268327	-0.18695	-0.125236	-0.231839	0.103797	0.0699098	-0.179125	0.269069	0.061424	0.271015	0.345939	0.18821
ENSG00000122779	O15164	TRIM24	1	-0.0155632	-0.192202	0.227732	0.054842	0.038102	-0.03334	0.0078695	-0.0800443	-0.0295488	-0.235297	0.0212777	0.0560179	0.147931	0.0584288	0.0829339	0.157494	-0.0223862	-0.146318	0.10183	-0.238123	0.143415	0.110293	-0.107057	-0.108288
ENSG00000122786	Q05682	CALD1	1	0.529474	0.534812	-0.674591	0.0308752	-0.201699	0.10294	0.408692	0.32777	0.411771	-0.197348	0.104957	-0.123869	0.44451	-0.195733	0.130552	-0.289733	0.387113	-0.149611	0.25676	-0.648015	0.516821	-0.881161	-0.115077	-0.71021
ENSG00000122873	Q9NZ45	CISD1	7	0.23984	-0.197705	0.157596	-0.322978	0.333267	0.034983	0.363921	0.217999	0.189385	0.282536	-0.216314	-0.139973	-0.0933317	0.384548	0.247296	0.24543	-0.409863	0.0125093	-0.586387	-0.0544285	-0.270075	0.16055	-0.325594	-0.253213
ENSG00000122912	P16260	SLC25A16	6	-0.585446	-0.508629	-0.142727	-0.547643	0.05791	0.220279	-0.230339	-0.192573	-0.242092	0.152565	0.131958	0.392217	-0.588691	-0.203359	0.0278607	0.231465	0.17079	0.403666	0.275762	0.397888	-0.0264801	0.33692	0.152621	0.316077
ENSG00000122965	Q9Y4C8	RBM19	5	0.208999	0.0172017	-0.283008	0.144121	-0.548531	-0.480432	0.106206	-0.0621615	-0.0829818	-0.273086	0.154706	0.0421804	0.327486	-0.0556565	0.0502288	-0.38324	0.213247	-0.116978	0.0796172	-0.409247	0.26665	0.338545	0.594033	0.152098
ENSG00000122966	O14578	CIT	1	0.197272	-0.0183224	-0.0719506	-0.0504826	-0.0105459	0.233515	-0.0986603	0.617993	-0.247334	-0.266048	0.511721	-0.146359	-0.434662	0.0527883	-0.310977	-0.508733	0.426668	-0.0494058	0.440894	0.752043	-0.424719	-0.249408	0.700348	-1.04563
ENSG00000122970	Q8WYA0	IFT81	4	0.267712	0.120288	0.0544598	0.394376	0.422981	0.338504	0.259121	0.123449	0.0480628	-0.0463996	-0.135926	-0.164642	0.144674	0.0965153	-0.122587	-0.219879	-0.217527	-0.355574	-0.0110224	-0.709196	0.235656	-0.245788	-0.0291048	-0.248152
ENSG00000123064	Q8TDD1	DDX54	1	0.311335	0.438143	-0.274302	0.458103	0.0797475	0.038793	0.333452	0.189141	-0.0344699	0.0997106	0.0839894	-0.339985	0.225639	0.0763694	0.0485314	-0.133048	0.0786257	-0.234965	-0.265402	0.0328218	-0.15148	-0.425324	-0.17446	-0.460965
ENSG00000123066	Q71F56	MED13L	7	-0.152005	-0.583825	-0.0646646	-0.0789579	0.0873068	-0.270439	-0.202295	0.302719	0.296139	0.302442	0.20397	0.150382	-0.0506998	0.104198	-0.207276	-0.260837	-0.160812	-0.0287857	0.320172	0.359419	-0.226944	0.0918424	-0.0237982	0.0927508
ENSG00000123091	Q9Y3C5	RNF11	9	-0.344678	-0.673617	0.485985	-0.182688	0.591977	0.133617	-0.238484	0.469969	-0.0564461	0.611258	0.0554623	0.265779	-0.1026	0.252636	-0.0504125	0.133005	-0.284898	-0.0432558	-0.175879	-0.167297	-0.31329	0.0554787	-0.184557	-0.237066
ENSG00000123130	Q9Y305	ACOT9	3	0.223266	0.318929	-0.270462	0.2521	-0.251895	-0.130664	-0.395054	0.130716	-0.0631854	0.240388	0.13741	-0.449345	0.175296	-0.17176	0.0316976	-0.695246	0.153177	0.0551156	0.172622	-0.0412254	0.00800143	0.2526	0.131942	0.185578
ENSG00000123131	Q13162	PRDX4	1	0.415918	0.43667	0.111441	0.135436	-0.0513002	0.119566	0.153701	-0.254539	0.326792	-0.144378	-0.20918	-0.263807	0.292944	-0.0131854	-0.0420848	0.115626	-0.268244	-0.298294	-0.313697	-0.00683165	0.111851	-0.212215	-0.00963801	-0.132551
ENSG00000123144	Q9BQ61	TRIR	6	-0.0437113	0.0803309	0.0274662	-0.23602	-0.226932	-0.00507995	0.00813431	0.313538	-0.0953161	0.315232	-0.28123	-0.0371919	0.0149923	0.0792778	-0.114681	0.0385927	0.0424778	0.16425	-0.0587593	-0.0958254	-0.170151	-0.052414	0.135862	0.197156
ENSG00000123213	Q9BYT8	NLN	9	-0.132787	0.0569283	0.150233	0.17028	-0.0621532	-0.0248769	0.430312	-0.106182	0.0256372	-0.223479	-0.00199755	0.102487	0.404109	-0.0775675	0.00704881	0.138122	-0.150074	-0.0287469	-0.230828	-0.0143191	-0.388015	0.381605	-0.485182	0.0594451
ENSG00000123240	Q96CV9	OPTN	9	0.0313683	-0.271384	0.260893	-0.448352	0.191453	-0.0770969	0.813933	0.323868	0.31013	-0.0213309	0.122063	0.193463	-0.100046	0.284659	-0.150675	-0.0057177	-0.100773	-0.0421681	-0.607199	-0.015772	0.0674341	-0.113502	-0.39835	-0.246897
ENSG00000123349	Q99471	PFDN5	7	-0.0671315	0.415361	0.132223	-0.209477	0.0633893	0.0884695	0.0261306	0.231485	-0.0874274	0.405736	-0.356106	-0.132726	0.0482169	0.260941	-0.192388	-0.00312114	-0.128648	0.163932	-0.156142	-0.0917253	-0.333755	-0.011902	-0.0821787	0.0168446
ENSG00000123374	P24941	CDK2	1	0.614374	1.28755	0.0441809	0.229237	-0.17424	-0.207239	-0.151451	1.83587	-0.0395408	0.399978	-0.120747	-0.766761	-0.0168891	-0.490544	0.103238	-0.294063	0.0562175	0.0765138	-0.0880515	-0.317971	-0.0375126	-0.880993	-0.273425	-0.787729
ENSG00000123472	Q5TC12	ATPAF1	4	0.245886	0.391718	0.557232	-0.0116956	0.455159	0.331866	0.00216721	-0.47309	0.0787026	0.117966	-1.04807	-0.324476	0.320408	0.0693407	-0.448979	-0.157271	-0.55147	0.0861848	0.447621	-0.269503	0.193538	-0.0845705	0.062097	0.00924255
ENSG00000123570	Q9NP90	RAB9B	9	-0.672241	-0.139875	-0.172963	-0.654869	-0.0117767	0.64035	-0.0854475	0.211444	-0.212429	0.328761	-0.706269	0.300466	-0.328467	0.147406	-0.337427	0.783553	-0.0754873	0.418021	0.220164	0.920919	-0.0617756	-0.0851811	-0.224913	-0.201964
ENSG00000123636	Q9UIF8	BAZ2B	2	0.231238	-0.360245	0.359899	-0.171014	0.294738	0.374454	-0.258913	-0.36405	-0.188318	-0.252523	0.322191	0.275585	-0.115612	-0.343527	-0.0750845	0.0709624	-0.132298	0.000366275	0.075698	0.298283	-0.135361	0.078207	-0.0192369	0.0345623
ENSG00000123684	Q92604	LPGAT1	9	-0.219434	-0.286024	0.11112	-0.0674936	-0.114001	0.0189772	0.100589	0.206338	0.078787	0.147395	-0.296606	-0.0821269	0.199437	0.12201	0.00129357	0.195728	-0.346738	0.112473	0.0266886	0.26599	-0.00395764	-0.0709903	-0.251203	0.151748
ENSG00000123737	Q06265	EXOSC9	1	0.192362	0.118758	-0.306649	-0.128429	-0.110762	-0.0182239	-0.0138507	0.322558	-0.249509	-0.083532	-0.0508061	0.00771956	0.134307	0.0727222	0.259474	0.0403641	0.115717	-0.171974	-0.213325	-0.094275	0.0218265	0.0975657	-0.0227956	0.0807567
ENSG00000123836	O60825	PFKFB2	9	-0.770745	0.215823	-0.310501	-0.242341	-0.0622244	-0.104538	-0.562974	0.500639	0.297935	0.0694321	0.0237344	0.844513	0.159945	-0.0963995	0.398583	0.425422	-0.193329	-0.0599225	-0.536402	0.252272	-0.411803	-0.20613	0.135781	0.233229
ENSG00000123908	Q9UKV8	AGO2	3	-0.370493	0.0119723	-0.0137918	0.391777	0.172831	-0.133169	-0.207642	-0.123198	-0.272419	0.0624756	0.604916	0.198788	0.0631196	-0.0147945	0.190665	-0.523287	0.0111383	-0.71297	0.496656	0.354903	0.139908	-0.0570879	-0.362076	0.0917771
ENSG00000123975	P33552	CKS2	1	-0.150699	0.319073	-0.694988	-0.366341	-0.709689	-0.314961	0.170271	0.8598	-0.195948	0.295065	0.0828189	0.147196	0.0150692	0.302081	0.19142	0.0698729	-0.280345	0.151557	0.373353	-0.109802	0.549508	-0.50996	0.0071118	-0.201465
ENSG00000123983	O95573	ACSL3	7	0.14124	-0.167235	0.534247	0.00166483	-0.00247978	-0.0011386	-0.0249203	0.0972269	0.133175	0.146752	-0.245014	0.170651	0.102261	0.439712	-0.137754	-0.0472019	-0.166103	0.0662783	0.0118794	-0.328817	-0.114126	-0.228014	-0.328507	-0.0537759
ENSG00000123992	Q9ULA0	DNPEP	6	0.0782534	-0.0312833	0.0402964	0.240211	-0.279668	-0.560745	0.137548	0.112998	-0.136066	0.221415	0.222153	-0.24797	-0.206424	0.437136	0.217748	-0.040528	0.229034	0.034678	-0.141826	-0.363559	-0.0731763	0.0819691	0.000500142	0.0273053
ENSG00000124006	O75147	OBSL1	1	0.684019	1.01689	-0.492687	0.619706	-0.212908	0.0704658	0.0213845	-0.83394	0.053603	-0.952543	0.252348	-0.281811	0.277874	-0.874206	0.422706	-0.530488	0.500889	-0.539505	0.431722	-0.296272	0.56507	0.119377	0.271827	-0.293523
ENSG00000124120	Q9BTX7	TTPAL	5	-0.25954	-0.570828	-0.102843	-0.415434	0.0585227	-0.0585458	-0.132875	-0.143027	-0.126204	-0.209739	0.307256	0.392458	-0.176848	0.0489696	-0.0586821	0.0552368	0.00948193	-0.087054	0.235158	0.247363	0.163207	0.289648	0.239452	0.294868
ENSG00000124126	Q8TCU6	PREX1	6	0.0815573	0.361284	-0.226679	0.617204	-0.623006	0.0218968	0.263194	0.12151	0.268031	0.0864645	0.0336101	-0.270103	0.395499	-0.0393831	-0.0569422	-0.178088	-0.0359503	0.0375679	0.135454	0.0252909	-0.311369	-0.445786	-0.039526	-0.22173
ENSG00000124160	Q9HCD5	NCOA5	6	0.137229	-0.247949	-0.364704	-0.333103	-0.247793	-0.16869	0.153114	-0.175812	0.0335077	-0.0936496	-0.0912349	-0.148332	0.102078	-0.198533	0.0377316	0.191691	0.0373696	0.286667	0.229896	0.281278	0.0664695	0.0400062	0.147324	0.32544
ENSG00000124172	P56381	ATP5F1E	9	-0.229821	-0.0365085	0.441239	-0.600926	-0.235801	0.360048	0.612717	0.82803	0.0475849	0.38835	-0.12849	-0.082667	-0.0731908	0.765464	-0.181671	-0.580561	-0.4591	-0.414166	-0.0542983	-0.307074	0.124161	0.328743	-0.0085697	-0.503494
ENSG00000124181	P19174	PLCG1	6	-0.106203	0.167635	-0.117198	-0.0795093	-0.185991	-0.0684228	-0.125756	0.0666161	-0.0275739	-0.0882787	-0.0211653	0.0207169	-0.0816583	-0.0347477	0.0816337	0.0844304	0.134239	0.135558	-0.0770879	0.041699	-0.0811809	0.161322	-0.0125647	0.213488
ENSG00000124193	Q13247	SRSF6	1	0.242473	0.346023	-0.339296	-0.227022	-0.00970338	-0.0342514	-0.0595657	0.119506	-0.133277	-0.248437	-0.0599676	0.135616	0.0557347	-0.254538	0.0755015	0.172776	-0.257671	-0.002421	0.0908804	0.0752028	0.407306	-0.00337538	-0.0317303	-0.0597637
ENSG00000124194	Q96MZ0	GDAP1L1	8	-0.204652	0.33713	-0.074358	0.247498	0.333768	0.624277	-0.991957	-0.247028	-0.203505	0.116	0.26697	-0.034959	0.230034	-0.169678	-0.218475	-0.305733	0.377083	0.433417	-0.0804076	-0.175955	-0.39796	-0.278446	0.358744	0.0581942
ENSG00000124207	P55060	CSE1L	4	0.34463	0.114199	-0.00202308	0.3737	-0.213509	-0.12528	0.304665	0.282175	0.229004	0.338309	-0.396708	0.0172182	0.217637	0.3584	-0.00895607	-0.0329638	-0.481235	-0.0794964	-0.158691	-0.244232	-0.00814212	-0.146703	-0.531425	-0.150574
ENSG00000124214	O95793	STAU1	9	-0.23333	-0.284068	0.145895	-0.126729	0.0616995	-0.00280907	-0.0859364	0.238889	-0.150874	0.0255207	-0.00240144	0.232337	-0.182561	-0.032421	-0.200018	0.00701854	0.0871751	0.199205	0.143644	-0.0647366	-0.0205179	0.0606922	-0.0206333	0.204959
ENSG00000124222	O14662	STX16	6	-0.307954	0.0207421	-0.505128	-0.306661	-0.286887	-0.577951	0.0553534	-0.39024	-0.0886363	-0.411989	0.383966	-0.103542	-0.0241057	-0.413091	0.671463	0.372465	0.527357	0.152707	0.10296	-0.0725444	0.299292	0.331429	0.481389	0.0896068
ENSG00000124226	Q9Y508	RNF114	2	-0.0405644	-0.147462	-0.564831	-0.34218	-0.452817	-0.397091	0.176109	-0.174583	0.192247	-0.177938	0.325189	-0.10502	0.10215	-0.189242	0.18847	0.0680383	0.306004	0.142023	0.213147	0.0570351	0.18353	0.0295363	0.3623	0.24595
ENSG00000124228	Q96GQ7	DDX27	5	0.139481	0.0231914	-0.0956864	0.157213	-0.257694	-0.321758	0.185023	-0.221615	-0.231101	-0.123355	-0.0207145	-0.155956	0.193358	-0.146178	-0.107529	-0.0217185	0.188308	0.152752	0.168332	0.0327402	0.178638	0.275863	0.0399812	-0.0315727
ENSG00000124356	O95630	STAMBP	2	0.021326	-0.0450204	-0.0154451	-0.188867	0.0875587	0.0798648	-0.140841	-0.321562	0.0311954	-0.174098	0.212373	-0.0893576	-0.0402582	-0.135772	0.223772	0.0994119	0.0999937	-0.04387	0.345641	-0.0051937	0.105496	-0.104419	-0.056499	0.0545692
ENSG00000124383	O00566	MPHOSPH10	5	0.369269	0.0202458	-0.0085335	-0.33708	-0.285279	-0.0303892	-0.295226	-0.157931	-0.329713	-0.249868	0.17691	0.395245	-0.0485742	-0.178632	-0.0844718	0.130317	0.0191995	0.279943	0.112954	0.0888577	-0.207133	0.0603578	0.164292	0.395242
ENSG00000124406	Q9Y2Q0	ATP8A1	7	0.113156	-0.0106463	0.621498	0.168792	0.401838	0.501526	-0.0219119	0.979944	0.0101661	0.536494	-0.229648	0.0557976	0.210333	0.547539	-0.277904	-0.397882	-0.319483	-0.0129608	-0.477849	-0.52234	-0.773823	-0.495562	-0.304273	-0.302802
ENSG00000124422	Q9UPT9	USP22	8	-0.402432	-0.368294	0.284487	-0.232982	0.313617	0.0660142	-0.379379	0.415402	-0.435412	0.253159	-0.129404	0.423769	-0.144124	0.294998	-0.447374	0.0861856	-0.182036	0.192787	-0.25637	0.231057	-0.144995	0.375235	-0.039412	0.225504
ENSG00000124507	Q9BY11	PACSIN1	9	-0.868839	-0.275606	-0.134779	-0.252423	-0.233711	0.311637	-0.397839	-0.538812	0.10438	-0.354837	0.188372	1.00259	-0.202356	-0.681203	-0.358224	0.546034	-0.375282	1.27659	-0.230725	1.24143	-0.553632	0.469307	-0.642799	0.960723
ENSG00000124535	Q96S55	WRNIP1	4	-0.0909208	0.197459	0.124489	-0.409183	0.122679	0.126091	0.0918605	0.255603	-0.261142	0.510238	-0.124056	-0.0767214	-0.0592555	0.24937	-0.0401459	0.103873	0.0657871	0.0622923	-0.03283	-0.291455	-0.149496	0.135046	-0.389775	-0.119806
ENSG00000124570	P35237	SERPINB6	1	0.206872	0.167788	-0.885212	0.14775	-0.652563	-0.809211	1.00663	0.687542	0.791181	0.668296	0.0481655	-1.11592	0.416686	-0.829778	-0.0721345	-0.313702	0.0689162	0.40414	0.0509533	-0.338516	0.321261	0.0929991	-0.443905	0.381763
ENSG00000124767	Q04760	GLO1	1	0.271398	0.189122	0.401853	0.403353	0.134124	-0.122362	0.141098	0.158833	0.22807	0.932968	0.00811939	-0.723118	0.133378	0.366937	0.45368	0.372863	-0.557861	-0.492135	-0.215048	-0.612574	-0.0868565	-0.382136	-0.337653	-0.666053
ENSG00000124784	Q9BRS2	RIOK1	9	-0.212616	-0.148696	0.146994	-0.361783	0.334772	-0.123194	-0.336984	0.310963	-0.444162	0.0525798	-0.037006	0.0243217	-0.0220632	0.223207	-0.433475	-0.0447343	0.00268762	0.287846	0.0222604	0.260827	-0.309435	0.304945	0.290583	0.212162
ENSG00000124789	P49790	NUP153	1	0.239291	0.138961	-0.0548249	0.261931	-0.000768874	-0.444096	0.232154	-0.155675	0.177984	-0.210139	0.0244354	-0.0616921	0.148244	-0.107152	0.0512626	-0.175113	-0.0591562	-0.170796	0.197754	0.0284431	0.0947551	-0.0647441	-0.0902778	-0.000779366
ENSG00000124795	P35659	DEK	1	0.327227	0.160353	0.286272	0.0635232	0.131128	-0.103639	0.163396	0.152808	0.00714298	0.152405	-0.246633	-0.27211	-0.0441792	-0.213546	0.0361334	0.136282	-0.079031	-0.105965	-0.141205	-0.282976	0.138494	0.0565539	-0.214564	-0.107869
ENSG00000125166	P00505	GOT2	7	0.215012	0.497647	-0.0471708	0.442038	0.0171939	-0.136707	0.198006	0.117313	0.293411	-0.0397148	-0.29537	-0.0325097	0.211599	0.481931	-0.161168	-0.0404616	-0.118719	-0.185549	-0.00555771	-0.105773	-0.817221	-0.0326971	-0.485554	0.0300216
ENSG00000125247	Q5T4D3	TMTC4	1	-0.533233	-0.373588	0.517609	-0.22524	0.572098	0.480725	-0.0449571	-0.119502	0.0107895	-0.182806	0.168924	0.0289192	-0.353126	-0.256059	0.275658	0.191308	-0.103152	-0.0847219	-0.0686349	0.0783407	-0.0284207	0.140623	-0.095473	0.00391925
ENSG00000125249	P10114	RAP2A	5	-0.247239	-0.521443	-0.236055	-0.458775	-0.524523	-0.590734	0.260876	0.123166	0.174049	0.157036	0.401302	0.00277917	0.036506	-0.0939551	0.374056	0.332134	0.214927	0.206577	0.0197569	-0.352823	0.326139	0.277988	0.0120075	0.106249
ENSG00000125257	O15439	ABCC4	1	0.180103	-0.515195	0.28754	0.716723	0.0757416	0.128655	-0.0260272	-0.467093	0.152752	-0.254291	0.701559	-0.606463	0.0797351	0.0183329	-0.275029	0.049614	0.424271	-0.483556	0.196671	-0.901989	0.501495	0.314569	-0.113501	-0.184616
ENSG00000125354	Q14141	SEPTIN6	7	-0.0318887	-0.0501345	0.642253	-0.309489	0.944933	0.61049	-0.422024	0.52512	-0.286565	-0.131768	-0.462774	0.492753	-0.622666	-0.229186	-0.263214	0.415571	-0.774266	0.343223	-0.860015	0.207137	-0.212696	0.525174	-0.463967	0.414
ENSG00000125484	Q9UKN8	GTF3C4	2	0.0755851	-0.172217	-0.10052	0.0986126	0.0441648	0.0763871	0.156062	-0.385599	0.117141	-0.23908	0.26678	0.175911	0.0593882	-0.127674	-0.136251	-0.0150991	0.0146917	-0.107821	0.0823157	0.0628773	0.0363344	0.0208353	-0.0752558	0.0724302
ENSG00000125633	Q567U6	CCDC93	5	-0.179594	-0.135572	-0.445648	-0.252584	-0.127492	-0.0660139	0.0541397	-0.314388	0.0903761	0.163244	-0.0916475	0.0870843	-0.140736	-0.175402	0.0353674	0.448204	0.103853	0.410873	-0.128319	-0.0425721	0.134819	0.27135	0.128666	0.171991
ENSG00000125656	Q16740	CLPP	9	-0.149965	0.0186982	0.250428	-0.0929666	-0.00302811	-0.0209438	-0.020525	0.590065	0.224883	0.415139	-0.424364	-0.250292	0.130322	0.618852	-0.0745737	0.193709	-0.268073	0.0620357	-0.242096	-0.306606	-0.188712	-0.0977734	-0.186256	-0.177957
ENSG00000125686	Q15648	MED1	2	-0.0105512	-0.0358963	-0.132585	-0.0744083	-0.263035	-0.328914	-0.306054	-0.0299475	0.0155664	-0.06793	0.333346	0.202611	0.0928045	0.0719936	-0.101867	-0.0207475	0.186524	-0.146892	0.235967	0.0277636	0.135656	-0.0857759	0.237636	0.0647356
ENSG00000125691	P62829	RPL23	3	0.427665	0.616774	-0.447201	-0.108746	-0.39585	-0.315497	0.254215	0.222708	0.0525641	0.317569	-0.0178597	0.000196291	0.111403	0.0840547	-0.124962	-0.241771	0.111193	0.0496644	0.136305	-0.57131	0.205475	-0.41006	0.138349	-0.0948805
ENSG00000125703	Q96DT6	ATG4C	1	0.303053	0.0132688	-0.172436	0.234179	-0.289175	-0.54948	0.0496417	-0.101271	0.030065	-0.400347	0.230442	-0.23467	0.304322	-0.228931	0.761734	0.410961	-0.0848131	-0.104118	-0.0462764	-0.0156995	0.102063	-0.0171169	-0.010826	-0.184569
ENSG00000125772	Q9NPB8	GPCPD1	2	-0.0101012	-0.386755	-0.0340375	-0.209983	0.185506	0.102589	0.136326	-0.397467	0.117549	-0.0502398	0.049762	0.255761	-0.206714	-0.0232298	0.12661	0.291097	0.131704	0.22392	-0.0539173	-0.166607	-0.154111	-0.0094241	0.024968	0.0567948
ENSG00000125827	Q9H1E5	TMX4	8	-0.336018	-0.991486	-0.116809	0.0177164	-0.134805	-0.052873	0.163683	-0.20155	0.163745	-0.0102976	-0.151106	0.688576	0.281161	-0.108614	-0.358328	0.376631	0.126207	0.261751	0.296159	0.029752	-0.0333297	0.132983	-0.260354	0.217207
ENSG00000125844	Q9P2E9	RRBP1	1	0.129724	-0.601859	0.350189	0.376275	-0.0279418	-0.12126	-0.0592806	-0.594372	-0.129653	-0.0364919	0.009326	0.0879698	0.0116543	-0.308822	0.299814	0.320386	0.438477	-0.00378104	0.359488	0.104554	-0.211143	-0.589086	0.0181349	0.177698
ENSG00000125868	P60981	DSTN	7	0.357955	-0.227182	0.295624	-0.0218634	-0.108969	0.140926	0.141219	0.307749	0.367365	0.322693	-0.165172	0.126907	0.443125	0.3551	0.503805	-0.15713	-0.296261	0.146095	-0.205993	-0.51825	-0.472617	-0.55559	-0.394725	-0.384809
ENSG00000125871	Q9BQP7	MGME1	1	0.138022	0.365357	-0.204138	0.110636	0.234322	0.00254919	0.109771	-0.0507197	-0.35918	-0.508718	-0.17466	0.017654	-0.214308	-0.341586	0.0770952	-0.337723	0.220871	0.381287	0.368216	-0.15331	0.196545	-0.108943	-0.236179	0.467142
ENSG00000125877	Q9BY32	ITPA	9	-0.151699	-0.365286	0.0155685	-0.473128	-0.317834	0.0500959	0.0321456	0.720849	-0.118204	0.462476	-0.22718	0.125498	-0.135207	0.381753	-0.209102	0.221904	-0.242863	0.179866	-0.33351	0.0909757	-0.189112	0.108573	0.163426	0.209994
ENSG00000125944	O43390	HNRNPR	3	0.245072	-0.0496404	0.235167	0.0771312	-0.572824	0.00543545	0.671362	0.00309515	-0.0386134	0.212734	-0.0878445	-0.174458	0.548654	-0.262381	0.30593	-0.350349	-0.0363605	-0.419678	0.363734	-0.203494	0.395906	-0.117789	-0.76858	0.0177899
ENSG00000125971	Q9NP97	DYNLRB1	9	-0.528067	-0.718687	0.0790385	-0.916939	-0.0924034	0.0180715	0.0298792	0.612514	-0.0605397	0.762821	-0.664889	0.253666	0.0669162	0.540134	0.322699	0.392373	-0.270192	0.191133	0.107426	0.0325622	-0.173663	0.231873	-0.194994	-0.0207319
ENSG00000126070	Q9H9G7	AGO3	6	-0.0756441	0.208568	0.430136	0.167725	0.265629	0.219357	-0.0789285	-0.0582261	0.0547325	-0.231156	0.545407	0.198999	0.341022	-0.116587	-0.213666	-0.785891	0.0356926	-0.343712	-0.613827	-0.420548	0.196845	-0.0436508	0.273258	0.0444669
ENSG00000126088	P06132	UROD	5	0.365847	0.212131	-0.0536252	-0.0991453	-0.192551	-0.253223	0.238344	0.0882697	0.470592	-0.144844	-0.218854	-0.211815	0.370425	0.261472	0.228371	0.160477	0.021239	0.246856	-0.199322	-0.240775	-0.404386	-0.504372	-0.00366671	-0.137445
ENSG00000126107	Q5T447	HECTD3	6	0.256165	0.243196	0.108769	-0.221484	-0.401506	-0.147622	-0.103692	0.00584768	-0.0451046	-0.0274905	0.274606	-0.00534371	0.00554942	0.11272	-0.142624	0.123544	0.114353	0.487893	-0.402124	-0.0942466	-0.290368	0.040347	-0.109876	0.21849
ENSG00000126214	Q07866	KLC1	9	-0.39338	-1.11822	0.510913	-0.623477	0.364254	0.231185	0.191511	0.78362	0.135244	0.443306	-0.30951	-0.151793	0.175481	0.798185	-0.362146	-0.0512085	-0.293497	-0.0320001	-0.362434	-0.378945	0.25649	0.259046	-0.0748909	0.00226198
ENSG00000126216	Q96CW5	TUBGCP3	1	-0.053617	0.0854321	-0.272443	0.250392	0.0839947	0.00400708	0.151991	-0.167914	0.227593	-0.154657	0.30863	0.262201	-0.109501	-0.593074	0.289062	0.322944	-0.165997	-0.276923	0.468532	0.145785	-0.199721	-0.321541	-0.162194	-0.122981
ENSG00000126217	O15068	MCF2L	9	-0.42334	-0.048584	-0.0443473	0.0935454	0.203254	-0.0304544	0.06777	0.0910449	0.15913	0.158141	-0.141982	0.0702071	0.121265	0.237952	-0.146035	0.0396367	-0.129577	-0.13072	-0.047293	0.376106	-0.325882	0.0591968	-0.225517	0.0164817
ENSG00000126226	Q5JVF3	PCID2	4	0.072542	-0.0433665	-0.107254	0.15756	-0.31039	-0.0387216	0.0837262	-0.10082	-0.0440298	0.152641	-0.3389	0.0210807	0.189371	0.13305	-0.0378844	0.140686	-0.0918683	0.185867	-0.199673	-0.0589935	-0.0475316	0.232713	-0.200008	0.250203
ENSG00000126351	P10827	THRA	9	-0.0549156	-0.362095	0.146728	-0.135556	0.284875	0.369336	-0.20692	-0.325119	-0.530199	-0.262708	0.0870517	0.131654	-0.375255	-0.336524	-0.0543638	0.136868	0.101812	0.2617	-0.00866101	0.422838	-0.0734409	0.471353	-0.0592236	0.370765
ENSG00000126464	Q9ULL5	PRR12	8	-0.32013	-0.436259	0.394754	-0.151836	0.430737	0.236179	-0.183237	0.421627	-0.132886	0.360708	-0.372203	0.0570752	-0.12369	0.47341	-0.684376	0.00962458	-0.119813	0.248565	-0.294894	-0.173163	-0.227548	0.298485	0.0395669	0.249301
ENSG00000126522	P04424	ASL	1	0.273972	-0.181526	-0.032177	0.123727	0.11025	0.324976	0.0513918	0.365635	-0.133003	0.415634	-0.162985	-0.325667	0.00785753	0.214688	-0.00345407	-0.352879	-0.0235681	0.0352761	-0.15514	-0.73888	-0.0452829	-0.0214069	0.560324	-0.307762
ENSG00000126524	Q9Y3A5	SBDS	5	-0.517609	-0.457218	0.194825	-0.217281	0.0499928	0.271272	0.120017	-0.102747	-0.0574877	-0.0141959	0.122708	0.234978	-0.190188	0.238256	0.0996769	-0.0285863	0.168062	0.215227	0.0539979	0.00470425	0.117143	-0.252162	0.015122	-0.0685066
ENSG00000126653	Q9H0G5	NSRP1	1	0.0549765	-0.0501885	0.121064	-0.328834	-0.135734	-0.200642	0.240784	0.122635	-0.00858164	0.162416	0.292898	-0.264521	-0.0498323	-0.0963645	0.0213956	-0.0957264	0.0475367	0.0313262	0.390536	-0.122774	0.0613211	-0.199652	0.0998642	-0.0939034
ENSG00000126768	O60830	TIMM17B	7	0.246458	0.277529	0.301718	-0.0174811	0.59973	0.468138	-0.150517	0.358929	0.280818	0.294721	-0.44212	-0.228716	-0.14936	0.26901	-0.212995	-0.0101493	-0.624272	0.0201355	-0.412853	-0.0140457	-0.449429	0.0277442	-0.472446	0.0394544
ENSG00000126822	A1L390	PLEKHG3	5	-0.0992451	-0.339616	0.223189	-0.427789	-0.197118	0.310592	-0.189285	0.344283	-0.21618	0.392669	-0.32006	0.0673895	0.206697	0.214297	0.374955	0.105213	0.131057	0.0548798	-0.0772433	-0.45559	0.2666	0.0216414	-0.0297142	-0.361622
ENSG00000126858	Q8IXI2	RHOT1	9	-0.152924	-0.0220747	0.479545	-0.344568	0.268641	0.24747	-0.524174	0.149183	-0.141261	0.187535	-0.128197	0.263323	-0.180912	0.240621	-0.189149	-0.142688	0.00875274	0.29071	-0.0669982	0.0224946	-0.439055	0.0474136	0.0313838	0.0949284
ENSG00000126878	Q9BQI0	AIF1L	1	0.968386	1.04466	-1.13827	0.566321	-1.71142	0.292629	0.122327	-0.500725	0.590192	0.587008	0.346074	-0.583108	0.372457	1.24518	-0.295745	0.217768	-0.313404	0.45242	-0.476472	-0.244624	-0.0217685	-0.0835299	-0.690991	-0.745369
ENSG00000126883	P35658	NUP214	1	0.266488	0.103127	-0.252363	0.28966	-0.108946	-0.47615	0.29163	-0.249897	0.259157	-0.399658	0.121734	-0.12517	0.56304	-0.405209	0.0272634	0.0463249	0.0158086	-0.316466	0.137791	0.124598	0.136296	0.0585006	0.0120535	-0.119611
ENSG00000126947	Q9P291	ARMCX1	9	-0.164405	-0.481478	0.217453	-0.225073	0.595343	0.580242	-0.247744	0.347424	-0.172349	0.394996	0.0367787	0.0638603	-0.582689	-0.020696	-0.0445374	-0.0423473	-0.0630879	0.195262	-0.197158	0.266248	-0.391599	0.0754189	-0.110877	-0.0289852
ENSG00000126950	Q53FP2	TMEM35A	9	-0.856456	-0.0589905	0.0588468	-0.731631	0.373677	0.318551	0.318701	0.46406	0.0282403	0.319472	0.25514	0.371718	-1.18704	0.103518	0.719165	0.0595029	-0.352736	0.094135	0.0439355	0.169832	0.56292	-0.779524	-0.462416	0.167382
ENSG00000126970	Q9NQZ6	ZC4H2	5	0.353553	0.167057	-0.0122509	-0.0584213	0.317724	0.286494	-0.273471	0.0884003	-0.05494	0.00947359	-0.0365145	-0.0759682	-0.453574	-0.00822062	-0.13227	-0.352739	0.0803811	0.121207	-0.357443	-0.238002	-0.0922592	0.186043	0.175974	0.359766
ENSG00000127054	Q5TA45	INTS11	5	0.0686537	0.28103	-0.235698	-0.106765	-0.106703	0.00372946	0.0985962	0.0269136	0.131342	-0.291606	0.0665768	0.0109279	0.0680324	0.0100661	-0.0963822	0.167372	0.0924614	0.0525405	-0.111024	-0.203467	-0.115273	0.0586357	0.112264	0.0177756
ENSG00000127152	Q9C0K0	BCL11B	7	-1.34505	-1.09599	-0.485648	-0.38569	-0.259408	-0.0118093	-0.00276854	0.367729	0.389683	0.6683	0.425493	0.383278	-0.0859717	0.541275	0.0406226	0.0538096	0.0973153	0.0954934	0.278554	0.338862	-0.387709	0.00299602	0.26942	0.107216
ENSG00000127184	P15954	COX7C	9	-0.0996457	-0.148848	0.236336	0.087988	0.168644	0.0463851	-0.144297	0.507419	-0.149674	0.344153	-0.380062	0.297908	-0.192535	0.603573	0.15505	-0.105737	-0.098953	0.0221689	-0.499363	-0.284106	0.0961051	-0.0419322	-0.290072	-0.130505
ENSG00000127314	P61224	RAP1B	3	-0.106912	0.0379628	0.433859	0.234744	0.719213	-0.245304	0.434519	0.251924	0.4213	0.399833	-0.214588	-0.177036	0.295272	0.168871	-0.00818707	-0.652809	0.317259	-0.0171577	-0.504913	-0.020508	-0.561144	-0.398406	-0.397927	-0.409862
ENSG00000127415	P35475	IDUA	6	0.189532	0.493758	-0.0639824	-0.0653954	0.150114	-0.050543	0.0299592	-0.282452	-0.270918	-0.545345	0.0358698	0.186243	-0.263283	-0.875827	-0.228194	0.303543	0.245246	0.60564	0.139259	-0.0729573	0.044408	0.0767391	0.328979	-0.110393
ENSG00000127445	Q13526	PIN1	3	0.237906	0.393167	0.243402	0.07601	-0.288783	0.0553198	0.0444553	0.0222468	0.0897143	0.290491	-0.435547	-0.478733	0.173761	0.249964	0.148551	0.0996837	-0.0965226	-0.354842	0.150631	-0.0147172	0.383783	-0.0619811	-0.200195	-0.727764
ENSG00000127483	Q5SSJ5	HP1BP3	3	-0.0689858	0.252035	0.160845	-0.151469	0.113986	-0.166345	-0.0373753	-0.161283	0.0103483	0.331082	-0.471279	-0.072798	0.220321	0.112321	0.0433296	-0.349353	0.00758345	0.206793	0.105048	-0.281726	0.363193	0.0771809	0.0341751	-0.277628
ENSG00000127511	O75182	SIN3B	8	-0.298526	0.121831	-0.0441966	-0.266305	0.406741	0.284992	-0.251588	-0.122622	-0.223083	0.0219856	0.134812	0.312674	-0.273146	0.0493015	0.00919178	0.0183843	0.158334	0.22735	-0.26976	0.0227913	-0.252735	0.264362	-0.0744387	0.0436508
ENSG00000127603	Q9UPN3	MACF1	8	-0.0542888	-0.51302	0.313555	-0.0587553	0.231621	0.0906756	-0.290267	0.35249	-0.178269	0.0499528	0.0916197	0.335224	-0.132632	0.337328	-0.391717	-0.240055	-0.263577	-0.2165	-0.194116	0.244291	0.015036	0.443619	-0.107135	0.134919
ENSG00000127914	Q99996	AKAP9	8	0.166869	-0.235706	0.232115	-0.135857	0.162672	-0.0696043	-0.489989	-0.163804	-0.289493	-0.2672	0.324259	0.366219	-0.358136	-0.0964147	-0.158314	-0.0693897	0.137056	-0.194716	-0.0249568	0.234942	0.264036	0.346018	0.135221	0.184174
ENSG00000127946	O00291	HIP1	1	0.482232	0.349343	0.40169	0.778518	0.483291	0.0980168	-0.308972	0.189993	0.0930523	0.0723229	-0.114238	-0.341589	0.179888	0.365437	-0.374926	-0.777931	-0.168605	-0.510046	0.162446	-0.782534	0.42103	-0.0534066	-0.138218	-0.506795
ENSG00000127947	Q05209	PTPN12	1	0.0891703	0.252343	-0.406835	0.175449	-0.252981	-0.372662	0.212243	-0.234327	0.240806	-0.143588	0.202556	-0.172361	0.219148	-0.361394	0.234652	0.0735828	0.289303	-0.169073	0.147086	-0.232619	0.236495	-0.0637111	0.19032	-0.153604
ENSG00000127948	P16435	POR	7	-0.175553	-0.303793	0.296605	0.0876378	0.24797	0.373045	0.28745	0.337241	0.0353922	0.289726	-0.3144	0.00129261	0.139706	0.398208	-0.146435	0.113136	-0.215986	0.0908804	-0.441692	-0.0672247	-0.43965	-0.324606	-0.132973	-0.135976
ENSG00000127955	P63096	GNAI1	9	-0.452357	-0.755693	0.217985	-0.301862	0.489886	-0.0820844	-0.266533	-0.066817	0.0504264	-0.369671	0.493297	0.0264553	-0.249288	-0.0596789	-0.183303	0.191579	0.0287524	0.208607	0.390637	0.371682	-0.265335	-0.0376508	0.327167	0.293799
ENSG00000128050	P22234	PAICS	1	-0.11628	0.266488	0.379539	-0.257125	-0.858575	0.0978737	-0.0583181	-0.117398	0.546215	-0.327252	0.469594	0.0425918	0.38131	-0.0092508	1.06892	-0.114244	0.224107	-0.153063	0.450413	-0.402214	0.496318	-0.753056	-0.618197	-0.638398
ENSG00000128059	Q06203	PPAT	3	0.682936	0.696099	-0.549585	0.175395	-0.737888	-0.375419	0.463638	0.370406	0.26595	0.215431	0.0594819	-0.0973774	0.420149	-0.217544	0.020756	-0.33931	0.369927	0.160124	-0.203585	-0.700281	0.385132	-0.67122	0.0721897	-0.465406
ENSG00000128191	Q8WYQ5	DGCR8	2	0.227249	0.0273024	-0.0993189	0.0245299	-0.223259	-0.295354	0.209609	-0.0513068	0.0678694	0.107217	-0.259995	-0.197431	0.136364	-0.026182	-0.0549925	0.0544743	-0.0647249	0.164621	0.0683666	0.0606671	-0.0282203	0.132261	-0.0761915	0.0964441
ENSG00000128245	Q04917	YWHAH	9	0.0161565	0.0788762	0.67862	-0.21673	0.501724	0.438672	-0.180229	0.0274867	0.093238	-0.0505239	0.220385	0.322127	-0.452677	0.0143167	-0.0830711	0.0496019	-0.122862	0.119338	-0.00848867	-0.100061	-0.515304	-0.425293	-0.0641394	-0.341165
ENSG00000128266	P19086	GNAZ	9	-0.723109	-0.720697	0.285945	-0.83956	0.508995	0.37634	-0.475468	0.810545	-0.327082	0.871121	-0.675624	0.513112	-0.660439	0.732223	-0.547988	0.767103	-0.530553	0.81898	-0.684493	0.236286	-0.454814	0.484498	-0.421594	0.656272
ENSG00000128309	P25325	MPST	3	0.250594	1.2073	-0.199166	0.227692	-0.015942	-0.197249	-0.144196	-0.492045	-0.0448739	-0.161626	0.0162205	0.050227	0.0787228	-0.398901	0.101961	-0.173076	0.426604	-0.342894	-0.210695	-0.13431	-0.110457	-0.408478	0.585558	0.0890269
ENSG00000128311	Q16762	TST	1	-0.0575562	-0.00129553	-0.268254	0.335437	-0.262241	-0.174182	0.240482	-0.331735	-0.0527095	-0.211018	0.204195	-0.33653	0.109607	-1.42254	1.24772	0.240383	-0.153328	0.00691446	-0.36148	0.108101	-0.180217	0.332339	0.611385	0.376525
ENSG00000128512	Q8N1I0	DOCK4	8	-0.242191	-0.569257	0.098071	0.0300292	-0.180331	0.00918349	-0.036532	-0.0839785	0.131539	0.099912	0.486963	0.496223	0.107154	0.0426346	-0.118288	-0.0552515	0.0767802	-0.00343964	0.337222	-0.262347	-0.194115	-0.182772	-0.0444019	0.0571939
ENSG00000128563	Q9H875	PRKRIP1	8	-0.132521	-0.203893	-0.0549582	-0.249952	0.0627497	-0.196941	-0.0510747	-0.012386	-0.150218	0.123239	-0.0273994	0.0889539	-0.0633028	-0.153275	0.000649442	0.0537683	0.0463602	0.132834	0.0648008	0.177664	-0.19655	0.22891	0.146852	0.365689
ENSG00000128567	O00592	PODXL	4	-0.465164	-0.463193	-0.0225566	0.810866	0.134873	0.13332	-0.0254962	-0.341978	-0.135519	-0.250625	-0.235149	0.0731604	0.440496	-0.0197173	-0.309675	-0.497747	0.331451	0.107561	-0.169107	0.7278	-1.03436	0.318986	0.400778	0.490991
ENSG00000128595	O43852	CALU	1	0.944898	0.863777	-0.364524	0.795682	-0.850493	-0.927705	0.681308	-0.47592	0.604825	-0.290118	0.233484	-0.265361	0.604258	-0.16441	0.419403	-0.478713	0.248232	-0.625814	0.569829	-0.939012	0.500967	-0.726128	0.236487	-0.594953
ENSG00000128607	Q6PID8	KLHDC10	9	-0.065267	-0.396555	0.12873	-0.0592478	0.438101	0.192474	-0.431813	0.238045	0.069998	0.122284	0.038949	0.1206	-0.23831	0.427269	-0.133489	-0.159472	-0.0487321	-0.191081	-0.0632252	-0.143307	-0.0017169	0.115058	-0.0252795	0.0659882
ENSG00000128609	Q16718	NDUFA5	7	0.184608	0.536212	0.788834	-0.512497	0.128905	0.195734	-0.0717348	0.565483	0.228683	0.48125	-0.589578	-0.0432003	-0.46378	0.584761	-0.150487	0.330183	-0.698763	0.592282	-0.33926	-0.571644	-0.056612	0.16797	-0.91141	-0.375941
ENSG00000128641	O43795	MYO1B	1	-0.0104227	-0.223695	-0.472637	0.0180524	-0.857242	-0.623937	0.58422	-0.202805	0.33401	-0.321526	0.28709	-0.50999	0.0542928	-0.202722	0.307791	0.00877213	0.404086	0.15074	0.269866	0.351343	0.142842	-0.0674276	0.183677	0.395621
ENSG00000128654	O75431	MTX2	7	-0.128933	-0.101675	0.713587	-0.44279	0.833744	0.711637	-0.193934	0.513004	-0.241275	0.516404	-0.426277	0.105092	-0.31768	0.665513	-0.149729	0.038827	-0.345417	0.112652	-0.607865	-0.172323	-0.595953	-0.186505	-0.330573	0.0304707
ENSG00000128656	P15882	CHN1	8	-0.294524	-0.237722	0.0748048	-0.282152	0.061262	0.17497	-0.00423957	-0.0155652	0.0282383	0.234022	-0.388145	0.11385	-0.0600391	0.196895	0.429267	0.271064	-0.584902	0.195256	0.450072	-0.0702265	-0.331612	-0.128174	-0.215259	0.382861
ENSG00000128708	O14929	HAT1	1	0.546335	0.0319056	-0.186324	0.529042	-0.25719	-0.120665	0.202319	-0.372578	0.511399	0.0694766	0.264515	-0.407069	0.67364	0.677997	0.382619	-0.557509	0.322469	-0.490149	-0.290662	-0.478435	-0.327264	-0.437881	0.343677	-0.629666
ENSG00000128791	Q9GZX9	TWSG1	1	1.50801	0.76501	-0.93634	0.960208	-0.574823	-0.385249	0.622202	-0.948307	0.869344	-0.508144	0.182747	-0.674201	0.635985	-0.775318	0.650329	-0.916853	0.275399	-0.364401	0.52325	-0.467457	0.241714	-0.90826	0.465165	-0.240016
ENSG00000128829	Q9P2K8	EIF2AK4	4	0.132392	0.360806	-0.191034	0.372713	-0.428993	-0.304002	0.146554	0.13819	0.110509	0.11003	-0.104374	-0.0831203	0.289797	0.222199	-0.0209582	0.200187	-0.1858	0.03184	-0.396653	-0.011175	-0.264641	0.201438	-0.339145	0.0132397
ENSG00000128872	Q9NZR1	TMOD2	9	-0.356165	-0.236848	-0.182754	-0.285225	-0.0541826	0.30888	-0.456494	0.392479	-0.472131	-0.179748	0.970886	0.890643	-0.242812	0.300758	0.469631	0.00418317	-0.208256	-0.0623474	-0.349968	-0.590609	0.512878	0.14681	-0.362318	0.04271
ENSG00000128908	Q9ULG1	INO80	8	-0.160485	-0.450423	0.162397	0.0377682	0.0208899	0.0181683	-0.423578	-0.302585	-0.169064	0.0737945	0.1774	0.288694	0.112099	-0.0353193	-0.336868	0.223603	0.0170197	-0.0587839	0.0163732	0.257081	-0.0505551	0.0822506	0.157743	0.342379
ENSG00000128928	P26440	IVD	1	0.424311	0.408157	-0.565224	0.639348	-0.52823	0.149525	-0.0202158	-0.329937	0.356138	0.26169	0.13034	-0.469213	0.21286	0.0229759	0.411541	0.135008	0.407398	0.0677311	-0.0555366	-0.36816	-0.180455	-0.892121	-0.125698	-0.0922349
ENSG00000128951	P33316	DUT	1	0.418301	0.652633	0.289154	-0.0254746	-0.391443	-0.436109	0.119313	0.395542	-0.000917242	0.702608	-0.275872	-0.0314435	0.362629	-0.772168	-0.0390583	-0.0355535	-0.479918	-0.241393	-0.234326	-0.176136	0.164552	0.0688006	0.0682844	-0.102003
ENSG00000129003	Q709C8	VPS13C	2	0.221889	0.240488	0.395168	0.302478	0.0506307	-0.0123076	-0.430993	-0.11141	-0.433113	-0.150748	0.210148	0.413792	-0.0826177	0.0808528	-0.201179	-0.408198	0.111952	-0.324086	-0.411812	0.0935503	0.284821	0.204526	-0.291904	0.248075
ENSG00000129116	Q8WX93	PALLD	1	-0.318614	-0.197752	-0.875792	-0.196462	-1.07339	-0.779938	-0.0120823	0.41444	0.272049	-0.545883	0.648986	0.28505	-0.0787707	-0.370377	0.252843	0.209388	0.332944	-0.356803	0.534843	0.620745	0.377848	0.325657	0.431333	0.0997381
ENSG00000129187	P32321	DCTD	3	0.0854835	-0.393879	0.257878	0.28574	-0.216348	-0.495272	0.121387	0.290226	0.170202	0.0091986	-0.0304966	0.12205	-0.0692836	-0.165534	-0.00513599	0.0940439	0.0405422	0.349945	-0.00569342	-0.261842	-0.362482	0.151216	0.00482257	0.0232319
ENSG00000129245	P51116	FXR2	8	-0.515582	-0.405619	0.0434781	-0.515733	-0.181591	-0.0642341	0.0918218	0.252418	0.013001	0.159087	-0.061377	0.176607	0.0526436	0.279218	-0.287035	0.0962293	0.170864	0.140699	-0.155054	0.15637	-0.105545	0.356642	0.0353563	0.267334
ENSG00000129317	Q9H0K6	PUS7L	5	0.206789	0.286296	0.0575917	-0.0745599	0.0632232	0.200734	-0.0631952	-0.103339	0.258015	0.0398044	-0.0547827	0.250769	-0.320214	-0.180002	-0.17963	0.0296129	-0.187534	-0.448824	0.1456	-0.122774	-0.270971	0.297025	0.0676933	0.102673
ENSG00000129347	Q8N9T8	KRI1	1	0.311484	0.0198507	0.0588132	0.135384	-0.119055	-0.802703	0.0193327	-0.150424	0.03111	-0.443947	0.164061	-0.136561	0.112378	0.0985295	-0.107308	-0.411131	0.335347	0.00129972	0.0514852	0.0109146	0.216513	0.0893222	-0.148251	0.663556
ENSG00000129351	Q12906	ILF3	6	0.128554	0.0702445	-0.104572	-0.0137696	0.0219407	-0.048237	0.0482304	0.024539	0.0346197	0.0591505	-0.0336383	-0.0163519	0.0395969	0.0704938	-0.0441256	0.0411109	-0.0945038	0.027852	-0.0751405	-0.00577777	-0.0645581	0.0229901	-0.121521	0.0328725
ENSG00000129472	Q8WUD1	RAB2B	8	-0.181939	-0.415936	-0.0298446	-0.7419	0.23498	0.106538	-0.0111833	0.143463	0.00649844	0.155192	-0.0101426	-0.061446	-0.0316673	0.137861	-0.0288585	0.107468	0.118138	0.0692735	0.111877	0.0729921	0.015156	0.291062	0.0423569	-0.0999384
ENSG00000129480	Q96FN9	DTD2	3	-0.419005	-0.0394695	-0.304516	-0.38473	-0.201289	-0.177684	0.0981403	0.183423	0.192083	0.212545	0.326646	0.168193	-0.180182	0.355921	0.235509	0.0179226	0.375684	0.296779	-0.171419	-0.363183	0.0877125	-0.190075	-0.0383748	-0.0806291
ENSG00000129484	Q9UGN5	PARP2	5	-0.222799	0.173822	0.261011	-0.135233	0.137122	0.112812	-0.454004	0.129311	-0.168001	-0.00676347	-0.0518746	0.130193	-0.00602383	-0.0711912	-0.231984	0.181496	-0.114013	-0.00133462	-0.0619008	0.112124	0.170972	0.206402	-0.233335	0.143194
ENSG00000129518	Q56P03	EAPP	5	-0.102385	-0.202857	0.0115084	-0.0699253	0.27276	0.0625463	-0.0983121	0.0508691	-0.0128488	0.0439061	-0.0948856	0.137082	-0.0847967	-0.0516194	-0.44516	-0.0774389	0.107607	0.123615	-0.15122	-0.00819379	0.0139538	0.0460337	0.351703	0.178058
ENSG00000129534	Q6P0N0	MIS18BP1	1	0.102445	0.112458	0.324722	-0.285242	-0.602512	0.528937	-0.105155	-0.663878	-0.0333493	0.273331	0.0724307	-0.350476	-0.291977	-0.19609	-0.251622	-0.0189032	0.841606	0.153778	-0.0264951	0.40501	0.154279	-0.206282	0.370513	-0.307526
ENSG00000129559	Q15843	NEDD8	9	0.0643237	-0.181004	0.305732	-0.312988	0.0807561	0.290732	0.0544248	0.386727	-0.242994	0.0910266	-0.668285	0.146318	0.253426	0.305209	0.00244544	0.339623	0.294948	0.00988875	-0.377118	-0.159112	-0.185388	-0.31687	-0.423649	0.241827
ENSG00000129625	Q00765	REEP5	8	-0.678137	-0.411929	0.169469	-0.317557	0.454087	0.293128	-0.103278	0.467292	0.191732	0.786147	-0.412395	-0.00770111	-0.304711	0.409712	0.365731	0.0836716	-0.537691	0.227665	-0.181729	-0.0776625	-0.0967385	0.0679277	-0.27271	-0.114324
ENSG00000129636	Q8TB96	ITFG1	9	-0.471471	-0.88486	0.866312	-0.511262	1.07387	0.894961	-0.634698	1.33649	-0.543604	1.11138	-0.39766	0.153491	-0.720793	1.0235	-0.794742	-0.122267	-0.447109	-0.044697	-0.543825	-0.0447916	-0.501914	0.197061	-0.236294	0.242923
ENSG00000129675	Q15052	ARHGEF6	2	0.618986	-0.502681	-0.283478	0.293993	0.0821943	-0.227523	0.516505	-0.437774	0.394524	-0.433119	0.190628	0.638514	0.0337207	-0.295537	0.39625	0.06727	0.158901	0.358434	-0.483813	-0.0637652	-0.106962	-0.260861	-0.533971	-0.120437
ENSG00000129682	Q92913	FGF13	7	-0.620152	-0.584223	0.930277	-0.651311	0.450428	0.567882	-0.455233	0.94431	-0.381525	1.05359	-1.2069	0.571362	-0.397705	0.939481	-1.23496	0.382359	-1.14386	0.169328	-0.316237	0.692588	-0.402466	-0.0585349	-0.0426845	0.794177
ENSG00000130021	Q08623	PUDP	4	0.592191	0.421816	0.862949	0.484588	0.94096	0.626459	0.521111	0.131195	0.386952	0.410343	-0.0755731	-0.550388	0.292217	0.349588	-0.0269377	-0.272175	-0.389435	-0.316446	-0.646303	-0.626404	-0.693865	-0.994756	-0.705241	-0.722845
ENSG00000130024	Q8WUB8	PHF10	1	0.019622	0.0718001	0.168884	-0.0964453	0.011174	0.00311241	-0.103077	-0.195162	-0.152424	-0.218412	0.204469	0.217324	0.0471784	-0.350182	-0.0472477	0.00264718	0.262709	-0.117639	-0.013965	0.0798849	0.302691	-0.0150904	0.0925941	-0.174446
ENSG00000130147	Q9P0V3	SH3BP4	3	-0.517586	-0.390228	-0.343915	0.12922	-0.651402	-0.297882	-0.18105	0.18074	0.159784	0.28136	0.346064	0.0276777	-0.0992581	0.521089	0.214734	0.0636285	0.071583	0.312283	0.738926	-0.103735	0.301571	-0.355474	-0.17471	-0.23342
ENSG00000130175	P14314	PRKCSH	1	0.0391904	0.173748	-0.420988	0.217822	-0.213199	-0.215747	0.153155	-0.119601	0.001608	0.0434994	0.0599993	0.0206795	0.277598	-0.270629	0.0413055	-0.191027	0.211134	0.0710042	0.197961	-0.366971	0.129209	-0.209026	0.339506	0.0297704
ENSG00000130177	Q13042	CDC16	2	-0.0842695	0.0111992	-0.111298	0.0237522	-0.152699	-0.0876038	0.063511	0.0080136	0.000747664	-0.109955	-0.0518909	-0.0894549	-0.054342	0.140328	0.0981483	0.151606	0.0919376	0.18282	-0.117662	-0.0667309	-0.0682795	0.142551	0.0184532	0.0611179
ENSG00000130204	O96008	TOMM40	3	0.221113	-0.000864455	0.250457	0.368482	-0.312863	-0.114202	0.325019	0.13889	0.174895	0.0361882	-0.350632	-0.353177	0.342525	0.366988	-0.387126	0.0122415	-0.251095	0.0774225	0.024907	-0.233498	-0.0731642	0.0461422	-0.16626	-0.142388
ENSG00000130224	Q5VUJ6	LRCH2	8	0.198393	-0.303677	0.685078	-0.305748	0.380883	0.231923	-0.313499	0.0861125	0.00887121	-0.0363054	0.245442	-0.199265	-0.286049	0.0856982	-0.0846065	-0.171234	0.253979	-0.31912	-0.182579	-0.271698	0.135282	0.154259	0.150484	-0.142626
ENSG00000130226	P42658	DPP6	9	-0.0263406	-0.0375132	0.275783	0.226939	0.318151	0.367112	-0.0598807	0.458569	0.174799	0.479601	0.282037	-0.310747	-0.276059	0.324137	-0.244098	-0.447018	-0.262864	-0.601839	-0.375972	0.233404	-0.641586	0.0806838	0.0326245	0.030076
ENSG00000130304	Q6PCB7	SLC27A1	6	-0.455656	-0.123287	-0.21377	-0.135915	0.0755247	-0.114851	-0.131067	-0.272822	-0.141866	0.0291082	0.298827	-0.262735	-0.0614976	-0.576026	0.398612	0.216026	0.598675	-0.0866961	-0.192384	-0.095196	0.0528971	0.384964	0.669305	0.13983
ENSG00000130349	Q9P0P8	MTRES1	9	-0.285258	0.0442508	0.197816	-0.0612018	0.292059	-0.284063	0.150056	0.049101	-0.132831	0.0958273	-0.303152	0.017665	-0.231289	0.0463819	-0.302476	0.497727	-0.18245	0.180054	-0.493367	0.193956	0.00960718	0.148778	-0.051573	0.404381
ENSG00000130396	P55196	AFDN	7	-0.330507	-0.352448	0.0403998	-0.365213	-0.0332728	-0.0586972	0.220376	0.371437	0.143654	0.350639	-0.158121	-0.0782953	0.207971	0.139515	-0.0446929	0.396228	-0.12088	-0.0947321	-0.0240599	0.0761805	-0.162283	0.167753	-0.24269	-0.0482614
ENSG00000130414	O95299	NDUFA10	7	-0.427516	0.0296777	-0.095802	0.185423	0.37073	-0.0195574	0.234212	-0.0630589	0.112825	0.215183	-0.0803406	-0.131237	0.0823386	0.333048	0.0438744	0.11582	-0.219756	-0.0304743	-0.0126822	-0.367684	-0.0542656	0.108446	-0.160069	-0.169135
ENSG00000130508	Q92626	PXDN	4	0.0825107	0.49804	-0.233858	0.213317	-0.131748	-0.217872	0.537385	-0.490986	0.177051	-0.294702	-0.0650126	-0.419179	0.391916	-0.31552	0.446682	0.181083	0.0987156	0.0244828	-0.0243164	-0.313628	0.0519187	-0.0772754	0.0865587	-0.205563
ENSG00000130511	Q9BWG4	SSBP4	7	0.130378	0.518513	0.154486	0.00491398	0.41209	0.776174	0.094247	0.0279207	0.215764	0.0537222	-0.327259	-0.0297241	0.025595	-0.227894	-0.338265	0.389892	-0.25918	0.151007	-0.276804	0.00891873	-0.555784	-0.271847	-0.63019	-0.0466746
ENSG00000130540	Q9BR01	SULT4A1	9	-0.0862214	0.286243	-0.234545	-0.195047	0.0926876	0.418756	-0.188538	-0.161198	-0.316589	-0.0699326	-0.182686	-0.05284	-0.151634	-0.223168	0.504221	0.562389	-0.0355428	0.254678	-0.142693	0.218155	-0.0580229	-0.111609	-0.211668	0.084805
ENSG00000130559	Q5T5Y3	CAMSAP1	8	-0.240156	-0.0410982	0.0447031	-0.375118	-0.114715	0.106164	-0.16647	0.0596437	-0.24567	-0.275487	0.157558	0.242093	-0.192088	-0.0954185	-0.181673	0.105581	0.183865	0.248679	0.243019	0.0811341	-0.12564	0.131739	0.135311	0.314044
ENSG00000130638	Q9UBB4	ATXN10	7	-0.0494591	-0.403814	0.446172	-0.0517302	0.374805	0.311574	-0.158856	0.79669	0.144342	0.78273	-0.20071	-0.0283565	-0.156265	0.98235	-0.22251	-0.265393	-0.446991	-0.114128	-0.317965	-0.219953	-0.456374	-0.205597	-0.37741	-0.163152
ENSG00000130703	Q9H1P3	OSBPL2	8	-0.483833	-0.378199	0.0132377	-0.191905	-0.146992	-0.00775381	-0.063094	-0.0766736	-0.0843278	0.150878	-0.000634663	0.163538	-0.00203367	-0.0317323	-0.046069	0.134308	0.0899057	-0.0439719	0.0366357	0.264251	0.0185503	0.338529	0.176794	0.170591
ENSG00000130725	P61081	UBE2M	9	-0.304882	-0.347556	0.376454	-0.652677	0.218667	0.332838	0.187177	0.676529	0.0981309	0.554752	-0.428985	-0.0330383	-0.0986248	0.557875	-0.225799	0.293864	-0.32117	0.106914	-0.386708	-0.0785576	-0.439952	0.0541556	-0.249157	0.109751
ENSG00000130726	Q13263	TRIM28	3	0.327712	0.284859	0.0375023	0.481021	-0.246907	-0.177955	0.378674	0.0408715	0.195368	-0.116984	-0.0992925	-0.168312	0.368703	0.0666805	-0.200193	-0.168953	-0.0910159	0.00343652	-0.198892	-0.275142	-0.122962	-0.221829	0.00844259	-0.104833
ENSG00000130770	Q9UII2	ATP5IF1	7	0.15283	0.857473	0.12665	-0.111199	-0.019956	0.0883851	0.0147784	0.136283	0.0295837	-0.0609435	-0.126514	0.108896	0.0852265	-0.355788	0.056485	0.0541584	-0.302452	0.0461659	-0.222299	0.0638912	-0.0424632	0.0957572	-0.603921	-0.0710284
ENSG00000130779	P30622	CLIP1	6	-0.166615	-0.240106	0.298083	-0.252999	0.490885	0.148042	-0.152422	0.0873833	-0.0605127	0.109097	-0.086486	0.194126	-0.185406	0.187432	-0.388109	0.0398774	-0.108665	0.242327	-0.177258	-0.0234062	-0.214359	0.073194	-0.00282515	0.188724
ENSG00000130787	O75146	HIP1R	8	-0.428332	-0.216479	-0.0618664	0.162304	0.410321	0.178437	0.399902	0.0186484	0.0172068	-0.0549561	-0.272923	-0.197099	0.14466	-0.270237	-0.148984	0.147161	0.0532622	0.0620787	-0.00918172	0.202688	-0.148775	0.215925	-0.192097	-0.0116637
ENSG00000130811	O75821	EIF3G	1	0.136258	0.492893	-0.154557	0.197199	-0.0431627	-0.0517143	-0.0813754	-0.121665	0.161253	-0.11643	0.166366	-0.0918877	0.25957	0.189168	-0.100896	-0.581559	0.248708	-0.309712	-0.0737978	-0.225463	0.1201	-0.296174	0.360626	-0.0837457
ENSG00000130816	P26358	DNMT1	1	0.223346	0.329114	0.117018	0.66731	0.244568	-0.00655902	0.268675	-0.0701283	0.22095	0.113191	-0.333104	-0.161752	0.443954	0.0658647	-0.147156	-0.35788	-0.198098	-0.40523	-0.0642162	0.0300606	0.0841	-0.193165	-0.339468	-0.531395
ENSG00000130826	O60832	DKC1	1	0.319078	0.0730406	-0.615331	0.361865	-0.559637	-0.463632	0.326695	-0.281926	0.177592	-0.397878	-0.0872899	-0.0395193	0.384942	-0.185375	-0.112091	-0.0648705	0.0490905	0.200343	0.164117	-0.0189638	0.149686	0.087092	0.223774	0.309201
ENSG00000130830	Q00013	MPP1	5	-0.222944	0.42543	0.107426	0.61867	-0.0478494	-0.35935	0.139568	0.116062	-0.0942471	0.159555	-0.234174	0.0174289	0.41349	-0.0514518	-0.223056	0.188341	-0.4186	-0.0462454	-0.232288	0.087821	0.0704009	0.0322003	-0.390509	-0.0556791
ENSG00000130935	Q9H8H0	NOL11	3	0.215844	0.147927	-0.0220028	0.185509	-0.372472	-0.355679	0.265052	-0.080258	0.0621378	-0.131576	0.000342327	0.0996962	0.264716	0.00997438	0.0820469	0.0740383	-0.138871	0.0122754	-0.000215244	0.0155541	-0.0295972	-0.178735	-0.229254	0.103547
ENSG00000130956	Q5JVS0	HABP4	8	-0.0764096	0.133234	-0.0580867	-0.279924	-0.113961	0.0210525	-0.0751271	0.283497	-0.0679016	0.178893	-0.174773	-0.130518	-0.247032	0.0814562	0.0100383	0.0776639	0.00687866	0.0496243	-0.0377076	-0.00614285	0.0726595	0.164833	0.0686838	0.119068
ENSG00000130985	P22314	UBA1	7	-0.0680037	-0.105746	0.190028	-0.031441	0.220276	0.175864	0.231682	0.377392	0.0951096	0.304756	-0.288337	-0.190334	0.162419	0.291694	-0.0932024	0.171278	-0.267485	-0.137375	-0.300813	-0.243777	-0.0768391	0.0731826	-0.258048	-0.232281
ENSG00000131013	Q8WUA2	PPIL4	3	0.166981	0.141515	0.0848669	-0.16865	0.26525	0.0651583	0.0195869	-0.232471	0.0138042	0.0249869	0.0117613	-0.0763267	-0.00258506	-0.046129	-0.00398399	-0.228522	0.0423457	-0.24461	-0.161375	0.121489	0.261268	-0.217455	0.197756	-0.034663
ENSG00000131016	Q02952	AKAP12	3	-0.078804	-0.850367	0.420944	0.73854	-0.0459487	-0.435911	0.288539	0.17778	-0.0389845	0.196097	0.470257	0.0596351	0.170304	0.703597	0.230092	-0.46356	0.409712	0.175889	0.0882666	-0.78237	-0.596795	-0.592692	-0.149235	-0.0949821
ENSG00000131043	Q9Y312	AAR2	5	0.0755519	-0.391222	0.0441673	-0.0666923	-0.122605	-0.330617	-0.064664	0.422305	0.187453	-0.0875343	-0.222116	0.112528	-0.191714	0.170891	-0.108345	0.00681041	-0.215497	-0.0027387	0.0301078	0.299475	-0.263646	0.242439	0.0801359	0.395527
ENSG00000131067	Q9UJ14	GGT7	9	-0.0705474	0.364873	-0.111302	-0.594708	0.0377043	0.131122	-0.0354056	0.0486785	-0.00342708	0.108362	-0.17557	-0.053923	-0.224752	-0.0176941	0.0560499	0.337746	0.00340829	0.0930197	-0.274838	0.262959	0.00102052	0.114506	-0.0911548	0.0938721
ENSG00000131100	P36543	ATP6V1E1	9	-0.759233	-0.341304	0.399448	-0.831087	0.26373	0.263756	0.00230229	0.777886	-0.302328	0.642755	-0.400658	-0.133136	-0.271585	0.598226	-0.111438	0.129865	0.0177827	0.189848	-0.293911	0.251035	-0.285087	0.253557	-0.0749432	0.0145202
ENSG00000131116	Q96B54	ZNF428	9	-0.427181	-0.736314	0.00647901	-0.349229	0.0466377	0.315175	-0.315658	0.288691	0.17718	0.656143	-0.429985	0.37979	-0.408351	0.499574	-0.301413	0.107723	-0.285389	0.269749	-0.0826682	0.0443056	0.069355	0.539827	-0.0571261	-0.00731442
ENSG00000131153	Q9Y248	GINS2	1	1.20376	0.895517	0.108396	1.82995	-0.643198	-1.10135	-0.380417	0.255648	1.69519	-1.37271	1.84302	-0.867571	0.246543	-0.597846	0.86114	-2.90158	-0.502402	0.0410505	0.741745	-0.806409	0.962282	-0.554767	0.610187	-1.56617
ENSG00000131171	O75368	SH3BGRL	1	0.645205	0.333944	-0.392928	0.480381	-0.0622924	-0.142396	0.202575	0.246234	0.648037	0.00192549	-0.260306	-0.250279	0.2392	0.266015	0.0903691	-0.395845	-0.184888	-0.302592	-0.342943	-0.567011	0.0693497	-0.1867	-0.0998463	-0.0352081
ENSG00000131174	P24311	COX7B	9	-0.175214	-0.173415	0.0299631	-0.503725	0.0839113	0.181648	-0.2088	0.345071	-0.0251274	0.795259	-0.371105	0.272694	0.00118976	0.525623	0.262039	0.165353	-0.544709	-0.0913427	-0.0402035	-0.0445762	0.475716	-0.379316	-0.763447	0.182512
ENSG00000131323	Q13114	TRAF3	7	-0.308155	-0.134263	-0.218311	0.114138	0.442379	0.300794	-0.281127	0.833991	-0.221582	0.458269	0.134924	0.00293489	-0.162283	0.429398	-0.664017	-0.694873	0.56233	-0.360382	0.184436	0.267395	0.252466	-0.276695	-0.898814	0.237049
ENSG00000131351	Q9BT25	HAUS8	1	0.872685	-0.257757	0.169097	0.0641943	1.04481	-0.119635	0.0358396	-0.133069	0.324099	-0.110789	0.0567588	0.172704	0.0386041	-0.791185	-0.261635	-0.286778	-0.176928	-0.967652	0.184343	-0.238416	0.0637559	0.465945	-0.192733	0.043743
ENSG00000131374	Q92609	TBC1D5	1	0.146362	0.111753	0.251952	0.560576	-0.437823	-0.175614	0.0513647	-0.0946434	0.634429	-0.259881	0.463397	0.0126122	0.362621	0.155111	0.357487	-0.713843	0.0462036	-0.668909	0.684631	-0.859858	0.708472	-0.796175	0.159692	-0.699917
ENSG00000131378	Q14699	RFTN1	8	-2.02046	-1.68348	1.32399	-2.95112	1.67453	1.40783	-2.62196	-0.307768	-1.62205	1.23652	-0.615969	0.136425	-2.89448	0.328382	-0.15514	2.75358	0.268677	0.270078	0.614154	1.52382	0.575641	0.653434	1.40083	0.70452
ENSG00000131381	Q9H1K0	RBSN	8	-0.258346	-0.634112	0.258037	-0.122141	-0.0359558	-0.145189	0.119098	0.0772807	0.127429	0.0953042	-0.31869	0.243994	0.01477	0.237415	-0.0486441	0.209157	-0.0425628	0.224615	-0.228792	0.126679	-0.105318	0.0453074	-0.0503197	0.210983
ENSG00000131435	P50479	PDLIM4	2	-0.804258	0.560974	-0.160992	-0.172788	-0.223767	0.684342	0.459006	-0.141686	0.546043	0.286625	0.147229	0.0464801	-0.262378	-0.112382	0.22975	-0.233962	0.0385923	-0.38261	-0.107428	-0.26549	0.203601	-0.0962958	-0.102242	-0.136364
ENSG00000131437	Q9Y496	KIF3A	9	-0.185561	-0.242589	0.28148	-0.309945	0.296162	-0.0188782	0.30952	-0.0244059	0.0924237	0.135659	-0.400632	-0.319777	0.073961	0.106791	0.198339	0.336947	-0.114837	0.0881842	0.142257	0.114793	-0.278504	-0.125657	-0.0839497	-0.0717789
ENSG00000131469	P61353	RPL27	3	0.365205	0.520398	-0.153534	0.114278	-0.322072	-0.538343	0.234101	0.235529	-0.0591266	0.415346	-0.0990142	-0.148325	0.281996	-0.0939852	-0.370674	-0.337901	0.0547455	0.30266	-0.18839	-0.122609	-0.102814	-0.11724	0.113008	0.0167595
ENSG00000131470	Q9P2W1	PSMC3IP	1	0.516292	0.674758	-0.563316	0.350081	-0.861809	-0.849607	0.349642	-0.214113	0.470588	-0.120258	0.11205	-0.153035	0.501364	-0.233338	0.538386	-0.119134	0.079398	-0.495503	0.249312	-0.44249	0.725319	0.26584	-0.776992	-0.0034353
ENSG00000131473	P53396	ACLY	4	-0.0102596	-0.176052	0.56148	0.104221	0.695859	0.323604	0.0853957	0.288151	-0.0868777	0.339052	-0.595322	-0.18114	-0.0345125	0.565849	-0.355347	-0.134864	-0.0592226	-0.0815294	-0.297377	-0.297475	-0.173301	-0.223954	-0.0500386	-0.206339
ENSG00000131495	O43678	NDUFA2	7	0.387048	0.138955	0.13236	-0.0105402	0.0231378	0.0210687	0.654837	0.346667	0.108275	0.500015	-0.287458	-0.197365	-0.133411	0.80397	0.216886	0.130323	-0.5654	-0.24667	-0.274007	-0.351129	-0.069807	-0.37057	-0.429013	-0.528174
ENSG00000131558	Q96A65	EXOC4	9	0.0646595	0.0269905	0.0742172	0.141892	-0.0690582	-0.369123	-0.0159381	0.379759	-0.230687	-0.0410619	0.355535	0.15813	-0.0213402	0.182048	-0.20591	-0.299164	0.222968	-0.0144357	-0.225271	-0.236098	-0.1572	-0.019115	0.257558	0.0406431
ENSG00000131711	P46821	MAP1B	9	-0.276265	-0.431852	0.539443	-0.405776	0.277535	0.29849	-0.217275	0.705224	-0.205098	0.690555	-0.184353	0.590599	-0.159958	0.779284	-0.420354	0.36302	-0.373581	0.4075	-1.00705	0.138679	-0.86804	0.11387	-0.573795	0.219196
ENSG00000131725	Q5JSH3	WDR44	9	0.0729934	-0.692519	0.418877	-0.236573	0.362315	0.168244	-0.17388	0.0835649	0.230842	0.0702258	0.178325	0.0573597	-0.253657	0.0428848	-0.00879726	0.141805	-0.0822057	0.247981	-0.28903	0.0310822	0.047167	-0.421425	0.0661112	-0.0616904
ENSG00000131732	Q8N567	ZCCHC9	1	0.252285	0.892601	-0.478126	0.251013	-0.173468	0.0223465	0.367503	0.013692	0.134379	-0.560072	0.150136	0.274023	-0.0303678	-0.296294	0.159323	-0.30752	-0.328383	-0.308287	0.265785	-0.154875	0.235603	0.037071	-0.101446	-0.316921
ENSG00000131747	P11388	TOP2A	1	0.256749	0.626363	0.962203	0.431016	0.345049	0.512212	-0.31643	0.104479	-0.360089	-2.0963	-0.249337	-1.15029	0.0192767	0.121861	-0.453679	0.584681	0.265309	-0.25986	-0.324952	0.289077	0.0791688	-0.104288	0.25723	0.460556
ENSG00000131773	O75525	KHDRBS3	9	-0.30673	-0.835027	-0.0161604	0.25741	0.0187798	0.0988762	0.592007	0.546313	0.0923766	0.475877	-0.345887	-0.281214	-0.0117919	0.616136	0.392204	-0.29515	0.166217	-0.0887884	-0.505193	-0.0888409	-0.194304	0.0547282	-0.0796584	-0.262179
ENSG00000131778	Q86WJ1	CHD1L	1	0.0509489	0.537839	-0.656924	-0.378875	-0.252755	-0.180567	0.164361	-0.149444	-0.171472	0.0715521	-0.216076	0.186995	0.0610233	-0.098701	0.153122	0.221345	0.310672	0.273555	0.0327112	-0.260325	0.150633	-0.00691763	-0.11823	0.27553
ENSG00000131844	Q9HCC0	MCCC2	3	0.0158278	-0.120279	-0.227322	0.304333	-0.420881	-0.274128	0.475584	0.0699137	0.709901	-0.200491	0.0455621	-0.325898	0.679632	-0.0481299	0.473481	0.0978156	-0.141449	-0.157626	0.195504	-0.306549	-0.012561	-0.179623	-0.311886	-0.340733
ENSG00000131873	Q86X52	CHSY1	6	-0.143449	-0.0131967	-0.685515	0.0803131	-0.545971	-0.551833	0.0939882	-0.36608	0.0485352	-0.296538	0.22263	0.30902	0.0563347	-0.391248	0.00968561	0.173002	0.206827	0.233628	0.171761	0.305252	0.11681	0.193018	0.372551	0.400474
ENSG00000131899	Q15334	LLGL1	1	0.61583	0.332183	0.277516	0.884678	0.051638	0.153997	0.362739	-0.233088	0.424634	-0.0538285	0.0376201	-0.608566	0.302649	-0.171087	0.0806832	-0.0339294	-0.446558	-0.392941	0.141461	0.0515826	-0.181792	-0.386828	-0.609885	-0.598707
ENSG00000131941	Q8IUC4	RHPN2	1	0.754826	-0.500981	-0.532929	0.0802257	-0.798428	0.898073	0.102845	-0.609111	0.76583	0.17863	0.125016	-0.565987	0.506331	0.340706	0.220253	-0.797032	0.947809	-0.589066	-0.414475	-0.190769	-0.163634	0.114347	0.600224	-0.472705
ENSG00000131966	Q9NZ32	ACTR10	9	-0.443768	0.0295309	0.408362	-0.286231	0.450482	0.350035	-0.138636	0.198783	-0.0432335	0.316231	-0.186909	0.0770582	-0.208033	0.687597	-0.0235947	0.138995	-0.160344	0.257479	-0.524198	-0.18084	-0.388939	-0.0814113	-0.430252	0.181837
ENSG00000132002	P25685	DNAJB1	1	-0.100708	0.528137	-0.582987	0.157978	-0.359154	-0.267287	0.38668	0.336215	0.0441026	-0.548169	-0.0394105	0.0826025	0.453135	-0.505533	0.118055	0.315677	-0.209353	0.361629	0.0276621	-0.0515686	0.108588	-0.0626549	-0.427227	0.233593
ENSG00000132024	Q6P1N0	CC2D1A	5	-0.235431	0.204022	0.0276894	-0.0254524	0.274948	0.108757	-0.138095	0.0365801	-0.265153	0.0367554	-0.107714	-0.131386	0.0809272	-0.0530936	-0.0408204	0.0262536	0.109726	-0.0151705	-0.253412	0.0883523	0.00697746	0.307795	-0.132497	0.0894396
ENSG00000132182	Q8TEM1	NUP210	1	-0.0950789	0.803756	-0.392705	0.301322	-0.626719	0.251043	-0.170567	-0.143859	0.121293	0.19016	-0.498741	-0.376846	0.0510188	0.430148	-0.145905	0.0155052	0.324609	0.223622	-0.169445	0.0164857	0.204689	-0.445782	0.240565	-0.108566
ENSG00000132196	P56937	HSD17B7	4	-0.0643848	0.470884	0.17282	0.113552	0.343209	0.369086	-0.129656	0.3527	-0.183269	0.717475	-0.639178	0.455468	0.258803	0.634339	-0.181409	0.119007	-0.169897	0.192906	-0.77695	-0.30924	-0.81441	0.513097	-0.988398	-0.456553
ENSG00000132254	P53365	ARFIP2	9	0.379072	-0.125648	0.165493	-0.082596	-0.0792994	0.200589	-0.292301	0.0263484	-0.0493083	0.0197482	-0.432293	-0.226103	0.0547426	0.31526	-0.266553	0.175176	0.141978	0.164078	-0.396749	0.138177	-0.436473	0.238565	-0.0195488	0.387644
ENSG00000132256	Q9C035	TRIM5	1	0.24147	-0.148032	0.0407175	-0.122861	-0.398973	0.523583	0.350384	-0.50486	0.12647	0.137365	-0.27111	-0.195494	0.137861	-0.753431	0.266846	-0.248487	-0.102393	0.530955	-0.103947	1.02318	0.192683	-0.322903	-0.0315373	-0.367491
ENSG00000132382	Q9BQG0	MYBBP1A	5	0.07826	0.378094	-0.211971	0.362275	-0.0926748	-0.276753	-0.0588793	-0.250066	0.0029179	-0.0354353	0.103559	-0.013649	0.128282	-0.0401459	-0.404383	-0.279415	0.256119	0.105436	-0.189076	0.0310224	-0.0165182	0.0379481	0.31392	0.0711324
ENSG00000132383	P27694	RPA1	1	0.731338	0.600102	0.0588208	0.429744	0.0363395	0.609973	0.102795	-0.477897	0.618229	-0.327791	-0.191947	-0.475155	0.567979	0.132852	0.118856	0.149447	-0.16969	-0.446392	-0.58235	-0.353147	0.012376	-0.465159	-0.456208	-0.223114
ENSG00000132388	P62253	UBE2G1	7	-0.0804853	-0.134915	0.294439	0.0198616	0.345145	0.19006	-0.164533	0.376287	0.303168	0.322286	-0.133641	-0.0244956	0.0399111	0.472609	-0.489451	-0.102517	-0.174903	-0.0785678	-0.0708574	-0.148838	-0.273112	-0.209639	-0.253507	-0.024304
ENSG00000132405	Q9P2M4	TBC1D14	9	-0.303904	-0.0329791	0.559847	-0.211083	0.0481948	-0.0310274	-0.155031	0.361411	0.186515	0.32271	0.280436	-0.00513124	-0.0819507	0.268011	-0.092578	0.180665	-0.499104	0.0337344	0.0210985	0.142086	-0.293696	-0.219278	-0.576389	0.097442
ENSG00000132423	Q9NZJ6	COQ3	9	-0.342129	-0.326876	-0.0453169	-0.310907	0.205757	-0.1294	0.0185057	0.292068	-0.215191	0.416189	0.0180941	0.0479106	0.336649	0.867952	-0.110808	-0.096018	-0.104695	-0.141014	-0.0890213	0.269637	-0.10246	0.16639	-0.378345	-0.246971
ENSG00000132434	Q9NS86	LANCL2	7	0.057034	-0.975345	0.83693	-0.312777	0.463481	0.620514	-0.0471335	0.602301	-0.22943	0.489254	-0.476908	0.254879	-0.293517	0.460239	-0.448749	0.0778312	-0.324265	0.361555	-0.364879	0.0647221	-0.566411	-0.19194	-0.117116	0.0597322
ENSG00000132463	Q12849	GRSF1	1	-0.0529722	-0.0293877	-0.273303	0.0147706	-0.251549	-0.243589	0.0103375	0.194208	0.0523968	-0.0486944	0.0160673	-0.074251	0.203174	-0.0301696	-0.106751	0.0370958	0.0307371	-0.0580009	0.0807756	0.0124377	0.203179	0.140495	0.0363986	0.136594
ENSG00000132466	O75179	ANKRD17	9	-0.188574	-0.16976	0.234675	-0.106155	0.107624	-0.0572637	-0.124304	0.176006	-0.120961	0.0999629	0.00445797	0.122387	0.0646214	0.217698	-0.265114	0.0036862	-0.133906	-0.102979	-0.0255584	0.151436	-0.0454391	0.287418	-0.154761	0.0248014
ENSG00000132478	Q9C0B0	UNK	2	0.150659	0.207651	-0.0829001	0.0419155	-0.200946	-0.0596574	-0.0790911	0.0918201	-0.224097	0.138737	0.104833	-0.0956567	-0.12511	-0.394509	-0.384443	-0.0103118	0.236262	0.0385026	-0.0795231	-0.0172119	0.130213	0.181214	0.349607	0.0820418
ENSG00000132522	Q13227	GPS2	2	0.0527768	0.140024	-0.22572	-0.0333882	-0.235849	0.031858	-0.0457517	-0.0359984	-0.138533	-0.0279176	-0.226883	-0.0040435	0.159878	-0.109631	0.0350256	0.0238462	0.100289	-0.0397768	0.192743	-0.208086	0.284228	-0.00517128	0.171471	0.144609
ENSG00000132535	P78352	DLG4	9	-1.48693	-0.742186	0.334873	-0.125852	0.28867	1.09289	-1.18143	0.252554	0.0212377	0.469913	0.0867782	0.418525	-0.576784	0.165324	-0.508587	0.489353	-0.164868	0.673245	-0.245966	0.521019	-0.653478	0.320022	0.378894	0.172788
ENSG00000132541	P52758	RIDA	1	-0.44187	0.553376	0.0769106	0.388071	-0.413322	-0.66348	1.16693	-0.0154699	0.275736	0.388871	-0.168153	-0.237976	0.309772	-0.725421	0.44952	-0.105794	-0.0141679	-0.253074	0.206476	-1.09699	0.437821	-0.352683	-0.0381304	0.273046
ENSG00000132563	Q9BRK0	REEP2	8	-0.127635	0.369363	-0.149363	0.0355316	-0.0769746	0.178979	-0.22179	0.0179684	0.207388	0.0542542	-0.0922433	0.241784	0.0401611	0.0483718	-0.0370658	0.0701559	-0.0939173	0.311277	-0.116938	-0.131641	-0.123612	-0.0838556	-0.334137	0.0139376
ENSG00000132581	Q99470	SDF2	9	-0.235347	-0.251215	0.21741	0.0592221	-0.0689007	0.0502792	0.0834986	0.182137	-0.0415812	0.372753	-0.392946	0.0698674	0.103815	0.162354	-0.0901514	-0.00987584	-0.196292	0.137385	-0.333656	0.0894271	-0.0743437	0.287846	-0.246458	0.124774
ENSG00000132589	Q14254	FLOT2	6	0.0816323	0.00720752	-0.229635	0.262402	-0.407348	-0.302161	0.348525	0.0595921	0.420347	-0.251384	-0.0110495	-0.291132	0.239822	-0.046208	0.0760113	-0.255428	-0.0530552	0.0341644	0.034578	-0.261982	0.126456	0.149499	0.263758	0.00538701
ENSG00000132604	Q15554	TERF2	9	-0.513139	-0.471959	0.333679	-0.336463	0.367084	0.203028	-0.125105	0.461516	-0.148693	0.543585	-0.137486	0.271727	-0.163211	0.505608	-0.461264	0.214711	-0.339777	0.286537	-0.293634	0.107666	-0.326971	-0.0262752	-0.259177	0.308013
ENSG00000132639	P60880	SNAP25	9	-0.215702	0.111996	0.0100679	-0.742949	-0.38428	-0.0903631	0.223878	0.186644	-0.208416	0.124085	-1.07299	0.122822	0.0582268	0.527507	0.0221369	0.2271	-0.402767	0.687724	0.0384628	-0.533302	0.0854665	0.132954	0.263953	0.827745
ENSG00000132646	P12004	PCNA	1	0.276102	0.134755	-0.618193	-0.234387	0.0125727	-0.348075	-0.417363	0.11494	0.017154	-0.34205	0.00186263	0.464928	-0.13931	-0.0791722	0.385325	0.136988	0.263472	0.118436	0.386966	-0.148448	0.162259	-0.331984	-0.076052	0.259276
ENSG00000132688	P48681	NES	1	-0.44835	-0.317681	0.404075	-0.142514	-0.214341	0.0203571	-0.0585755	-0.851216	0.104539	-0.747781	-0.0112283	-0.823061	0.544927	-0.267327	-0.101235	0.00389847	0.375743	0.357934	-0.354247	0.535588	0.392301	0.338676	0.415713	0.843802
ENSG00000132692	Q96GW7	BCAN	2	-0.295296	-0.0090903	-0.627385	-0.136508	-0.585709	-0.297805	-0.0754202	0.668009	0.0759475	0.294461	-0.0858195	0.442387	-0.195922	-0.144176	-0.23268	-0.609722	0.119072	0.323348	0.351548	0.998908	-0.105854	0.544957	0.426937	-0.844187
ENSG00000132716	Q5TAQ9	DCAF8	1	-0.0741433	-0.105749	-0.0872908	-0.087483	0.0550484	-0.0153882	0.0866075	-0.16745	-0.0486319	-0.0368912	0.012245	0.0193483	-0.0437912	-0.25481	0.139295	0.267246	0.0902512	-0.0502941	-0.0303276	-0.0415866	0.0666631	0.18787	0.0540443	0.0652183
ENSG00000132780	P49321	NASP	1	0.259038	0.384876	-0.0456403	-0.115343	0.18058	-0.114083	0.0942256	-0.0486578	-0.000988679	0.172602	-0.422792	-0.020084	-0.0650412	-0.0965323	-0.0818612	0.0927848	-0.0427626	0.0667873	-0.115179	-0.231322	0.113673	0.0966485	-0.138151	0.0772219
ENSG00000132821	Q96N03	VSTM2L	7	-0.213182	-0.12845	-0.184481	-0.0105695	0.0879647	0.446936	-0.100361	-0.198073	0.350455	0.000974744	0.0120073	0.122065	-0.816528	-0.264089	0.298242	0.463358	-0.0242093	0.479191	-0.322181	0.519605	-0.638895	-0.426546	0.318669	0.228097
ENSG00000132842	O00203	AP3B1	1	0.358006	-0.574052	0.380649	0.353213	-0.10868	0.48878	0.190822	0.134891	-0.0280919	-0.167441	-0.0548397	-0.332383	0.518739	-0.111026	0.0505528	-0.0333962	-0.192058	-0.458102	0.0710949	-0.337111	-0.0131343	-0.151596	0.347358	-0.332194
ENSG00000132906	P55211	CASP9	2	-0.193344	0.0963129	0.0331384	-0.128904	-0.578598	0.0632396	0.230184	0.0798929	-0.0360091	-0.345661	-0.330928	-0.554468	0.450124	0.260061	0.444991	-0.118719	0.14571	-0.258363	0.230744	-0.576622	0.156972	0.0817225	0.526587	0.321938
ENSG00000132912	Q9UJW0	DCTN4	8	-0.224706	-0.53426	0.262662	-0.0836278	0.22131	-0.0376978	-0.241851	0.112934	-0.123306	0.0248428	0.193245	0.103288	0.149385	0.24148	-0.0987574	-0.14392	0.164297	0.0571769	-0.079885	0.0391525	-0.0183253	-0.021913	0.0148434	0.0236313
ENSG00000132964	P49336	CDK8	4	0.309048	0.290082	0.707356	0.176669	0.364858	0.241773	-0.0141345	0.0614577	-0.000561526	0.239393	-0.494009	-0.202813	0.133464	0.182544	-0.537523	0.0162159	-0.0831649	-0.105629	-0.338544	-0.253051	-0.282799	-0.313743	-0.17455	0.0776605
ENSG00000133026	P35580	MYH10	1	0.522742	0.408183	-0.0676295	0.550735	-0.297603	-0.435814	0.276438	-0.168919	0.264144	-0.527121	0.0348388	-0.133822	0.556016	-0.156281	0.171432	-0.237855	-0.0291215	-0.528832	0.0926266	-0.468361	0.492596	0.0682144	-0.0711434	-0.315461
ENSG00000133104	Q8N0X7	SPART	1	0.345373	0.703154	-0.195295	0.276324	-0.565374	-0.409899	0.608592	-0.887297	0.543652	-0.209102	0.0234489	-0.311774	0.255514	-0.52907	0.434481	0.0191259	-0.515522	-0.474813	0.570891	0.0498718	0.169541	0.129714	-0.0339802	0.00244233
ENSG00000133112	P13693	TPT1	3	0.215967	0.200969	-0.284042	0.160614	0.103133	-0.223831	-0.0712142	0.0701139	-0.134418	0.187536	-0.0898146	0.0484474	-0.127023	0.241779	-0.0957868	0.224163	0.0427618	0.0174747	-0.152968	-0.199923	-0.151694	-0.156712	0.146987	0.0274828
ENSG00000133119	P40938	RFC3	1	0.296051	-0.0477988	0.189985	-0.358867	-0.359468	-0.0684323	-0.117973	-0.509957	-0.095981	-0.579944	0.134407	-0.127202	-0.252052	-0.404579	0.368663	-0.0788713	0.353957	0.545813	0.388646	0.395577	0.288	-0.105121	0.356476	-0.211326
ENSG00000133216	P29323	EPHB2	2	-0.103311	-0.32809	0.002706	0.36456	0.0501798	-0.349262	0.150275	0.366627	0.22067	-0.0243387	0.0525822	-0.171013	0.00518821	0.038064	-0.186556	-0.530938	-0.0528179	-0.237745	0.446632	-0.319157	0.109572	0.107055	0.13115	0.257967
ENSG00000133226	Q8IYB3	SRRM1	2	0.188842	0.17972	-0.271999	0.066949	0.00171809	-0.137249	0.0479519	-0.15485	-0.12117	-0.155855	-0.0410282	-0.00278372	0.172972	-0.250629	0.00985874	0.219513	-0.0352385	0.0639925	-0.0412912	-0.0757855	0.02709	0.0753898	0.00040656	0.233476
ENSG00000133316	Q6RFH5	WDR74	5	-0.210398	-0.246763	0.147278	-0.0524284	0.0123937	-0.243574	0.0494866	0.137321	-0.12056	0.0603623	-0.00343181	0.0818233	0.0470496	-0.121556	-0.0980391	-0.193476	0.250795	0.3253	-0.292476	-0.0703546	0.0562781	0.258607	-0.00965166	0.236014
ENSG00000133318	O95197	RTN3	9	-0.132843	-0.00122618	-0.0713026	-0.0798031	0.277638	0.52125	0.048531	0.526192	0.290751	-0.0998568	-0.246359	0.255545	-0.506054	-0.170182	-0.569048	-0.663737	0.044549	0.147474	-0.110179	-0.0474508	-0.0802118	0.401244	0.456613	-0.191531
ENSG00000133398	Q9BTT4	MED10	7	0.137984	0.109282	0.039577	-0.266355	0.157107	-0.0376563	0.00359286	0.0484689	-0.365139	-0.188495	-0.0830345	0.111632	-0.291814	-0.135446	0.182791	0.231423	0.20148	-0.0152942	-0.168502	-0.0252282	-0.195345	0.384378	0.112591	0.052002
ENSG00000133606	Q9UHC7	MKRN1	9	0.173032	0.0217548	0.0861786	-0.0676606	0.281436	-0.0362158	-0.0976771	0.0732054	-0.120426	0.119032	0.0296091	0.104623	-0.0207653	0.107508	-0.172264	-0.0240298	-0.119862	0.00110619	0.0153042	-0.122974	-0.0676299	0.006823	-0.0763951	-0.0937125
ENSG00000133612	Q96P47	AGAP3	9	-0.202642	0.11295	0.489161	0.226986	0.319879	0.369315	-0.369731	0.306562	-0.248301	0.309142	-0.386937	0.205114	-0.191155	0.096311	-0.70888	-0.103202	0.0998976	0.303372	-0.3606	0.268521	-0.4055	-0.0687711	-0.235604	0.174112
ENSG00000133627	Q9P1U1	ACTR3B	6	0.127707	0.0889007	0.463726	-0.0985868	-0.500045	0.250898	0.606595	0.0893338	0.197742	0.512249	-0.199546	0.51662	0.140332	-0.204577	0.0194189	0.258338	-0.336739	0.149417	-0.553514	-0.298393	-0.529457	0.00325095	-0.48617	-0.217501
ENSG00000133703	P01116	KRAS	7	0.0196915	0.209454	0.583221	0.322154	0.390262	0.310354	0.057981	-0.341909	0.352855	-0.107562	-0.0700475	0.207527	0.0645732	-0.246109	-0.248531	-0.0495052	-0.144338	-0.188431	-0.421129	-0.223932	0.370321	0.235408	-0.556888	-0.52542
ENSG00000133704	O15397	IPO8	3	0.343162	0.45656	0.0128272	0.565051	-0.789774	-0.283288	0.284781	0.202587	0.282017	-0.104453	0.0373972	-0.230473	0.69157	0.447469	-0.0623206	-0.247399	0.131229	-0.385393	0.172588	-0.482394	0.133519	-0.481292	-0.182426	-0.511546
ENSG00000133789	Q9UH65	SWAP70	1	0.32107	0.512048	-0.0328885	0.510632	-0.634002	-0.277862	0.183386	-0.325051	-0.0169498	-0.614783	0.615281	-0.266314	0.536296	-0.598827	0.460825	-0.00610237	0.779432	-0.192766	0.736319	-1.0044	0.0330598	-0.404805	-0.209162	-0.10444
ENSG00000133818	P62070	RRAS2	4	-0.0536065	-0.14005	-0.307556	0.759561	-0.169072	-0.331257	-0.353472	0.706381	0.432181	0.0589764	0.24355	-0.140368	0.181616	-0.0884494	0.119006	0.116749	0.413322	-0.0441901	-0.591953	-0.472128	-0.250548	-0.300031	0.0435938	0.167746
ENSG00000133835	P51659	HSD17B4	1	0.120233	0.0728506	-0.0473481	0.272521	-0.0645837	-0.0389092	0.254315	-0.279825	0.143664	-0.207662	0.24205	-0.0956122	0.248949	0.110253	0.220969	-0.0650114	0.353668	-0.162776	-0.213571	-0.538983	0.164378	-0.215696	-0.0101548	-0.263719
ENSG00000133858	O60293	ZFC3H1	5	0.188779	0.188727	0.285944	-0.230465	0.115291	-0.121363	0.0663973	0.0994599	-0.984297	-0.323435	0.25049	0.359433	-0.122958	0.122503	-0.317192	-0.0116367	-0.193926	-0.132538	0.387989	0.229867	-0.124409	0.0637193	0.160423	0.0431966
ENSG00000133884	Q92785	DPF2	1	0.0398691	0.160958	-0.174617	0.0303958	0.00148811	-0.429067	0.294561	-0.274547	0.135855	-0.436137	0.3537	-0.215638	0.423848	-0.47453	0.00735333	-0.0926142	0.324007	-0.146502	0.0718345	-0.0203146	0.235866	-0.0381405	0.201285	0.0210867
ENSG00000133935	Q9UKR5	ERG28	7	0.661147	0.0369944	0.455515	0.452526	0.17266	0.162315	0.229223	0.50068	0.147487	0.287886	-0.656628	-0.0980813	0.517108	0.616499	-0.106989	0.191815	-0.473036	-0.0486762	-0.417577	-0.861904	-0.263243	-0.372203	-0.628609	-0.504909
ENSG00000133985	Q92623	TTC9	9	-0.564692	-0.729877	-0.49546	-0.713174	-0.731252	-0.622455	0.206958	0.21715	-0.163348	0.0711101	0.433911	0.456196	-0.46948	0.0478989	0.399948	0.342566	-0.110632	0.550801	0.22495	0.619452	0.271439	0.400593	-0.204071	0.561469
ENSG00000134030	O43310	CTIF	9	-0.299943	0.170504	0.151387	0.338474	0.166041	0.00922975	-0.254505	0.10562	0.0146717	0.31709	0.383607	0.115392	-0.445956	-0.26699	-0.119724	-0.316596	0.0680071	-0.149065	0.00871081	0.105937	-0.159206	-0.02564	0.0239336	0.0590207
ENSG00000134077	Q9BV44	THUMPD3	5	0.21359	-0.392486	0.0159524	-0.0396491	0.0361612	-0.0748439	0.0863403	-0.0564072	-0.0290636	-0.0379948	0.144733	0.10982	0.0875493	-0.0190949	-0.123126	-0.186759	0.0495096	0.149561	-0.205076	0.035692	-0.0202836	-0.0066967	0.0494748	0.213097
ENSG00000134121	O00533	CHL1	9	-0.182544	-0.272051	0.654903	-0.322684	0.267205	0.449984	0.0780982	0.745905	0.0137257	0.458524	0.0401077	-0.0546623	-0.557159	0.435556	-0.204236	-0.262264	-0.135083	-0.165698	-0.565642	-0.378242	-0.242094	0.0176658	0.097508	0.0831742
ENSG00000134243	Q99523	SORT1	8	-0.371284	-0.571406	-0.0323456	0.0504188	0.0741937	-0.131544	-0.0172117	0.357009	0.0552932	0.309267	-0.317307	0.0842348	-0.0285666	0.190008	-0.00317693	-0.0151747	-0.142029	-0.145031	0.121339	0.207736	-0.0586982	0.170126	-0.0871645	0.301313
ENSG00000134247	Q9P2B2	PTGFRN	3	-0.457541	-0.321195	-0.471359	0.365646	-1.53411	-0.382565	0.517637	-0.150854	0.406573	-0.185853	0.0882942	0.0229326	0.690213	0.123861	0.920114	0.661425	-0.197584	-0.254369	0.893314	-0.13484	0.503335	-0.226765	-0.47409	-0.402217
ENSG00000134265	Q99747	NAPG	9	-0.213295	0.0392953	-0.123541	-0.34041	0.0501498	-0.060524	-0.0354636	-0.0337954	0.312768	0.0608922	0.132382	-0.0591251	0.0556862	0.0480894	0.0232177	0.200346	0.117894	0.140751	-0.178584	-0.00146042	-0.0874859	0.0716651	0.0228882	-0.14234
ENSG00000134278	Q08AE8	SPIRE1	6	-0.255028	-0.265948	0.257921	0.0918451	0.100939	0.108364	-0.344108	0.13232	-0.353969	0.0558307	0.00337494	0.259239	-0.379287	0.033493	-0.282476	-0.407352	0.200634	0.128855	0.154257	0.138435	0.0955766	-0.0613635	0.261878	0.32657
ENSG00000134308	P27348	YWHAQ	9	-0.463273	-0.621539	0.196527	-0.47619	0.285717	0.299203	-0.0660189	0.28285	0.235879	0.295816	-0.231565	0.128109	-0.0850656	0.424845	0.0191798	0.284634	-0.473107	-0.0145103	0.0804391	0.120804	0.0507606	0.301612	-0.493243	-0.0818639
ENSG00000134313	Q9ULH0	KIDINS220	9	0.109025	-0.0721146	1.18317	-0.0504409	0.218479	0.692485	0.0332595	0.661019	-0.00969929	0.957638	-0.897545	0.208896	-0.196774	0.639263	-0.513738	0.181723	-0.855134	0.209414	-0.7016	0.170092	-0.953595	-0.378079	-0.853087	0.217344
ENSG00000134330	Q2TAA2	IAH1	9	-0.0563689	-0.0926839	0.13592	-0.432533	-0.0204225	-0.112555	-0.162738	0.474856	-0.299221	0.75575	-0.176751	0.407662	-0.337759	0.562405	0.0492221	0.276822	-0.428681	0.241969	-0.264462	-0.335547	-0.217703	0.361715	-0.589489	0.260595
ENSG00000134369	Q8NEY1	NAV1	9	-0.0651938	-0.299792	0.108405	0.161333	0.153954	0.093279	-0.517029	0.129285	-0.172691	0.185817	0.0373686	0.267889	-0.210619	0.284733	-0.530573	-0.213658	-0.0687917	-0.120082	-0.0420095	0.240781	-0.103441	0.199684	0.141503	0.339849
ENSG00000134371	Q6P1J9	CDC73	1	-0.0664929	-0.14755	-0.207194	-0.109884	-0.0612218	-0.174447	-0.163995	-0.32747	0.150248	-0.190053	0.467462	0.143631	0.0188594	-0.147023	0.187681	0.109372	0.385082	-0.102607	-0.0959798	0.186291	-0.00792556	0.186539	0.323522	-0.356846
ENSG00000134376	P82279	CRB1	1	-0.195276	0.122062	-0.454108	0.190588	-0.0619424	-0.0441394	-0.0970357	0.11114	0.104678	0.146275	-0.150231	0.0239647	-0.123947	0.141402	0.2208	-0.153504	-0.104257	0.0252472	0.218704	-0.0292841	-0.1538	0.219001	-0.0068653	0.0505272
ENSG00000134444	Q9P260	RELCH	8	0.0904612	-0.0942007	0.0525362	-0.123703	-0.0200584	0.160805	-0.13456	-0.171362	-0.0773336	-0.14447	-0.339283	0.418802	-0.334842	-0.0216963	-0.00318109	0.297605	-0.0939492	0.00433402	-0.0127289	0.131157	0.0542893	0.293171	-0.115776	0.183981
ENSG00000134453	Q96I25	RBM17	3	0.204622	0.111796	-0.0708743	-0.0543556	-0.0575939	-0.134451	0.0116194	-0.118514	0.159329	-0.101407	0.0142356	0.0234753	-0.0222083	-0.12533	-0.0359148	-0.00247682	0.0947356	-0.0338729	-0.032909	0.0506125	0.0265247	0.0723118	0.0219418	-0.00129547
ENSG00000134504	Q719H9	KCTD1	2	-0.104728	0.0668173	-0.1648	-0.287815	0.595748	-0.0212117	-0.258773	-0.101659	0.145886	0.170765	-0.158518	0.008263	-0.0200872	-0.166046	0.567224	0.305981	-0.0261442	-0.158106	0.133202	-0.0472142	-0.110294	-0.428562	-0.103382	0.163452
ENSG00000134532	P35711	SOX5	7	-0.335688	-0.498772	0.255427	-0.28373	-0.214953	0.250074	0.344819	0.308624	0.104479	0.115368	0.32249	-0.357025	0.347131	0.324189	0.374716	-0.306091	0.134119	-0.630118	0.43695	0.0658362	-0.21986	-0.29468	0.132036	-0.375341
ENSG00000134594	Q14088	RAB33A	9	-0.922579	0.0873627	-0.125235	-0.512051	0.442676	-0.181064	-0.430186	0.818496	0.11093	0.339434	-0.398537	0.611895	-0.337039	0.178817	-0.4437	0.507	-0.241643	0.512303	0.0803462	-0.139854	-0.295187	-0.126596	0.42852	0.03589
ENSG00000134686	Q8IXK0	PHC2	3	0.0644862	-0.0564926	-0.393124	0.0454175	-0.403245	-0.367364	0.568306	-0.141744	0.540079	-0.102923	-0.0257879	-0.246505	0.503604	-0.156687	0.0920791	-0.0781322	-0.0450958	-0.205123	0.170625	-0.106397	0.180893	-0.0971358	0.12022	0.140047
ENSG00000134697	Q13823	GNL2	5	-0.00383201	-0.232475	-0.0130349	-0.0119615	0.0162906	-0.358914	0.117051	0.17232	-0.0607245	-0.205118	-0.229461	-0.0389001	0.000235417	0.00794462	-0.0425274	0.227934	-0.0265418	-0.0309562	0.279601	0.0343798	0.315877	0.0227835	0.100815	-0.0407851
ENSG00000134709	Q9UJC3	HOOK1	7	-0.521619	-0.79553	-0.151037	0.46676	0.0935513	0.335043	0.0151067	-0.668887	0.714974	0.553126	-1.21889	-0.218478	0.120331	0.107419	-0.433018	0.784049	0.431319	0.874929	0.397321	-0.214487	0.0714209	-0.364264	-0.894894	0.515756
ENSG00000134744	Q5TAX3	TUT4	4	0.265419	0.183662	0.00780921	0.229541	0.2006	-0.0338136	-0.148837	-0.420055	-0.258199	-0.248067	0.301677	0.06525	0.0836463	-0.236152	0.0358111	-0.154243	0.180599	-0.0276071	-0.0166939	-0.194285	0.0418948	0.049948	0.171935	-0.0798386
ENSG00000134775	Q2V2M9	FHOD3	3	-0.252064	-0.490989	0.0673484	-0.202778	-0.019683	0.109576	-0.0723521	0.264112	0.131213	0.186331	0.358569	0.234851	-0.0952106	0.206907	-0.0716873	-0.083456	-0.00643897	0.0613055	-0.188069	0.0601404	-0.212324	-0.121214	-0.0499339	0.185847
ENSG00000134824	O95864	FADS2	4	-0.158324	0.29937	-0.0653182	0.0375342	-0.262826	0.140184	0.187509	0.0556063	0.0472385	-0.099241	-0.178768	-0.048804	-0.111036	0.194953	-0.0511125	0.156573	-0.0896187	0.204316	-0.060817	0.066123	0.0684707	-0.180121	-0.236673	0.0847829
ENSG00000134851	Q9HC07	TMEM165	1	0.226324	0.0261248	-0.114425	0.121384	-0.422773	-0.407697	0.280922	-0.0881867	0.311882	-0.0581367	-0.00052996	-0.309562	0.546203	0.137089	0.299009	0.00105633	-0.10819	-0.219054	0.170452	-0.300988	0.252419	0.0754533	-0.199845	-0.218931
ENSG00000134882	Q8NBM4	UBAC2	1	0.484001	0.219406	-0.494762	0.499126	-0.683124	-0.346832	0.617684	-0.349784	0.399292	-0.135954	0.355162	-0.0791816	0.388238	0.0866499	0.149416	-0.138658	0.112513	-0.444962	0.11671	-0.0579181	0.0436771	-0.29919	-0.170949	-0.270561
ENSG00000134900	P29144	TPP2	2	-0.228263	-0.335815	-0.166349	-0.161204	-0.288353	-0.128089	-0.0898092	-0.109999	-0.00202972	0.257013	0.177573	0.320169	0.015866	0.201701	-0.0253289	0.20429	0.125407	0.0173368	-0.144161	-0.137998	0.113966	0.124932	0.198072	0.0610718
ENSG00000134909	A7KAX9	ARHGAP32	9	-0.252902	-0.166196	0.363427	-0.16844	0.364721	0.100654	-0.466559	0.11183	-0.181255	-0.0373893	0.371132	0.433256	-0.284752	0.0239654	-0.148098	-0.415731	-0.116742	-0.0106106	-0.118202	0.0576839	0.245311	0.0288484	0.0299045	0.236144
ENSG00000134910	P46977	STT3A	1	0.21358	0.486729	-0.0161195	0.476217	-0.43471	-0.73492	0.489019	-0.216002	0.0411569	-0.0401372	0.18623	-0.355656	0.503153	-0.438678	0.259883	-0.135967	0.371543	-0.145317	0.112876	-0.418407	-0.0324673	-0.257753	0.255961	-0.170214
ENSG00000134982	P25054	APC	8	-0.381381	-0.472731	1.03454	-0.304228	0.696227	0.0509916	-0.602536	0.4686	-0.769385	0.202981	0.299296	0.52477	0.203813	0.138882	-0.441958	-0.32029	-0.37854	-0.266611	0.0896274	0.123946	0.0560268	0.201481	-0.147015	-0.00650642
ENSG00000134987	Q8NI36	WDR36	5	0.0538776	-0.249257	-0.307691	0.0320806	-0.194597	-0.199549	0.10623	-0.448574	0.180703	-0.316006	0.169762	-0.016952	0.242238	-0.25072	0.0241601	0.170048	-0.0840232	0.246556	0.0811395	-0.00627608	0.15454	0.167416	0.177524	0.267372
ENSG00000135002	Q969G6	RFK	8	-0.227283	-0.0303815	0.304441	0.193077	0.257996	0.215905	-0.43462	0.58357	-0.694237	0.596827	-0.802376	0.0630622	-0.222165	0.0189778	-0.0368103	0.137978	-0.295032	0.279304	0.0853237	0.0992586	-0.278337	-0.0834968	-0.133374	0.402391
ENSG00000135040	Q5VZE5	NAA35	8	0.0392995	-0.0897886	0.0853234	0.191992	0.0593725	-0.266398	0.0301434	-0.0200039	-0.0334861	0.174498	-0.0939598	0.0667541	-0.0710246	0.148012	-0.0717973	-0.0515925	0.0587062	-0.10795	-0.200074	0.0129341	-0.130497	0.199522	0.000797833	0.0692181
ENSG00000135049	Q9UPW5	AGTPBP1	7	-0.203511	-0.0475285	0.077367	-0.317791	0.0473751	0.0765288	-0.114094	0.25615	-0.036057	0.0964456	0.0223508	0.12743	-0.0902519	-0.00388037	0.0576434	0.0301356	0.178002	-0.000300879	-0.0547197	-0.00406827	-0.00805653	-0.0837272	0.124706	-0.130148
ENSG00000135052	Q8NBJ4	GOLM1	6	-0.0401811	-0.427799	-0.0738211	-0.0227586	-0.103778	0.0300052	-0.00752302	-0.189041	0.139042	-0.134724	0.258755	0.00744916	-0.0622153	-0.18285	0.21625	-0.459624	0.266166	0.0549592	0.129949	-0.119852	0.242822	-0.0243547	0.478086	0.0250394
ENSG00000135069	Q9Y617	PSAT1	1	0.680491	1.30876	-0.0812823	0.034839	-0.0126457	-0.065543	0.304739	-0.239054	0.317361	-0.554202	-0.122718	-1.21943	0.391362	-0.466958	1.10096	-0.623475	0.336218	-0.607944	0.812891	-0.385964	0.744298	-0.65363	-0.135147	-0.863926
ENSG00000135070	Q9BUE6	ISCA1	9	-0.111987	-0.249574	0.154471	-0.200968	0.285798	0.189842	-0.252606	0.36536	0.0554491	0.391476	-0.21317	-0.0211689	-0.191981	0.39535	-0.106403	0.180974	-0.316005	-0.108497	-0.148764	0.0416211	-0.156786	0.205449	-0.158577	-0.0293015
ENSG00000135097	O43347	MSI1	1	-0.23063	0.0636156	-0.0510473	0.0542325	-0.0636082	0.134769	0.0614974	-0.011096	0.0670258	0.0493164	-0.00914021	0.0549164	0.126686	-0.270032	0.00433175	0.187739	0.194961	0.169286	0.0162145	-0.218358	-0.0218745	0.0137378	-0.150502	-0.172043
ENSG00000135241	Q9NP80	PNPLA8	9	-0.139946	-0.269494	0.534261	-0.418033	0.189676	0.078663	-0.0031851	0.507875	-0.264916	0.428602	-0.236322	0.130373	0.126821	0.418172	-0.420442	-0.0844522	0.225147	0.111761	-0.559741	-0.178735	-0.16266	-0.109222	-0.0878061	0.183601
ENSG00000135250	P78362	SRPK2	9	-0.319628	-0.961777	0.578868	-0.113845	0.524103	0.331745	-0.153064	0.715048	-0.263035	0.332357	0.288902	0.148033	-0.162022	0.626547	-0.29397	-0.0719198	-0.17537	-0.134104	-0.152174	-0.0411138	-0.127168	-0.246636	-0.201327	-0.128451
ENSG00000135316	O60506	SYNCRIP	6	0.18734	0.0978937	-0.284096	0.158864	-0.318149	-0.334406	0.17689	-0.315614	0.143563	-0.29414	-0.0165408	-0.102106	0.248962	-0.172214	0.196706	-0.0890231	-0.096048	-0.19398	0.375206	0.0743089	0.278482	0.242255	-0.0136805	0.049526
ENSG00000135333	Q15375	EPHA7	7	-0.0671379	-0.520009	0.112772	-0.175709	0.0400064	0.0889624	0.241588	-0.0951901	0.135278	0.0955995	0.013396	-0.000505762	0.111437	-0.0555663	0.16597	0.175564	-0.168125	0.190057	-0.127349	-0.0542566	0.200671	0.119828	-0.206917	-0.220365
ENSG00000135336	Q9UBD5	ORC3	1	0.342832	0.28975	-0.185079	0.208366	0.0352841	0.00917981	0.0752234	-0.147095	0.190611	-0.36706	0.0807579	-0.408375	0.387567	-0.164944	0.168833	-0.341353	-0.0185756	-0.419024	-0.000511889	-0.034832	0.429704	0.13953	0.0436401	-0.314428
ENSG00000135365	Q96BD5	PHF21A	6	-0.155377	-0.137956	-0.145224	-0.315786	0.100032	-0.0287011	-0.309931	0.0937617	-0.115671	0.0610993	0.0740592	0.182182	-0.22396	0.0507313	-0.0243427	0.104013	0.204245	0.107247	0.0344512	0.0272842	0.0225679	0.0664877	0.141729	0.187058
ENSG00000135404	P08962	CD63	1	0.0122682	0.227347	-0.427909	0.231095	-0.149421	-0.0662609	0.676603	-0.39482	0.541334	-0.565332	0.0676955	-0.502288	0.787445	-0.438361	0.306789	-0.442455	0.587051	0.0924001	-0.3574	0.266734	0.164554	-0.490784	0.35924	-0.485526
ENSG00000135446	P11802	CDK4	1	0.690453	-0.236527	-1.06521	0.945693	-0.913699	-0.931805	1.01924	-0.0932012	0.904141	-0.331057	0.0272261	-0.394035	0.833412	-0.125695	0.462316	-0.19779	-0.0330483	-0.28008	0.483637	-0.371759	0.126895	-0.412352	0.0844971	-0.191249
ENSG00000135454	Q00973	B4GALNT1	8	-0.370602	0.148797	0.117051	-0.130763	-0.0966467	0.137857	0.0305158	-0.258572	0.128663	-0.12935	-0.0488256	0.139681	0.195991	-0.0228204	0.0517178	0.0838446	0.00691351	0.0751016	-0.355786	-0.0854677	0.227857	0.143457	0.0660342	-0.0546481
ENSG00000135457	Q12800	TFCP2	4	0.151261	0.107365	0.179434	0.0975524	0.227066	0.0113343	0.000635826	-0.0670008	-0.119084	-0.146758	0.105616	-0.17377	0.204847	-0.0712607	-0.0298482	-0.108621	0.222409	-0.387317	0.0485259	-0.198364	-0.024133	0.0951309	-0.0668008	-0.0582199
ENSG00000135486	P09651	HNRNPA1	3	0.577595	0.0553493	0.0218352	0.227245	-0.210765	-0.300754	0.055836	0.0823991	0.0266913	0.172349	0.125631	0.0160828	-0.00491274	0.220931	0.0643029	-0.0213737	-0.0571834	-0.122874	0.181911	-0.471914	0.183977	-0.552542	-0.065945	-0.203873
ENSG00000135521	Q96GA3	LTV1	5	0.0408647	0.126238	-0.156306	-0.0140218	-0.0947587	-0.22567	-0.00834941	-0.320637	-0.0513694	-0.277717	-0.0287729	0.21147	0.0517845	-0.208358	0.0198178	0.300089	0.0226577	0.0533922	0.0310703	0.260327	-0.0816906	0.259686	-0.0581965	0.148452
ENSG00000135540	Q5SYE7	NHSL1	6	0.202052	0.104184	-0.225962	0.217704	-0.412882	-0.305521	0.00136715	0.037279	-0.0578829	0.098112	0.505954	-0.0158882	-0.0362088	0.0954053	0.209992	-0.0418633	-0.038363	-0.203362	0.449162	-0.016526	-0.155623	-0.309986	0.079839	-0.180982
ENSG00000135596	Q8TDZ2	MICAL1	8	-0.0404173	0.185752	-0.137091	-0.0328996	0.176148	0.233916	-0.159852	-0.0886562	0.0214077	0.0308007	0.0200658	0.0290146	-0.090166	-0.183432	0.0429327	0.221043	-0.0681895	0.176476	-0.373307	0.119925	-0.181381	0.0897153	-0.0182537	0.0264483
ENSG00000135631	Q9BXF6	RAB11FIP5	6	-0.149242	0.297443	-0.428791	0.18462	-0.489872	-0.582837	-0.268483	0.359205	-0.121418	0.0729476	0.368326	0.140609	0.128331	-0.396873	0.212394	0.131388	0.389188	0.284949	-0.138884	0.0440767	-0.211707	0.157108	-0.0244613	0.0419814
ENSG00000135638	Q04741	EMX1	3	-0.172935	0.324397	-0.0356745	-0.277857	-0.535986	0.196424	-0.274085	0.478836	-0.072172	0.214223	-0.0782103	0.478511	-0.227067	-0.0936662	0.278008	0.443533	-0.109508	0.516038	-0.788827	-0.106329	-0.388705	0.425911	-0.251411	0.0565517
ENSG00000135655	Q9Y4E8	USP15	9	-0.193803	-0.167779	0.429329	0.0126013	0.0163337	0.0601377	-0.146321	0.0111592	-0.328277	-0.237622	-0.192042	0.375926	0.463962	-0.16705	-0.263079	-0.291552	0.0524763	0.0448682	0.317231	-0.0492449	-0.398436	0.237592	0.245104	0.168485
ENSG00000135698	Q99547	MPHOSPH6	4	0.424552	0.277756	-0.0480846	0.477151	0.0145573	-0.13839	0.208119	-0.00391104	0.173661	-0.123988	-0.470344	-0.122675	0.159707	-0.0299732	-0.125487	-0.122553	-0.284377	-0.0549778	-0.111057	-0.272295	0.133148	-0.026271	-0.0752093	0.140941
ENSG00000135709	O60268	KIAA0513	9	-0.780651	-0.519417	0.0680156	-0.360423	0.287164	-0.273834	-0.306514	-0.494525	0.204437	-0.272305	-0.164814	-0.0157593	-0.183583	0.0947414	-0.0234536	0.410428	0.214463	0.306515	-0.137284	0.501576	0.99546	0.452883	-0.0341635	0.0310444
ENSG00000135720	O43237	DYNC1LI2	6	-0.406015	-0.318887	0.0984942	-0.477988	0.310865	-0.019543	-0.281529	0.0528013	-0.432549	0.0161977	0.208429	0.278595	-0.176859	0.168123	-0.0752587	-0.0530559	0.157847	0.121146	-0.00486679	0.0161095	0.0810522	0.357469	0.0947191	0.284704
ENSG00000135763	Q14146	URB2	3	0.578754	0.422437	0.120591	0.597099	-0.527765	-0.563001	0.0858573	-0.722013	0.145824	-0.244237	0.130806	-0.154977	0.314711	-0.117196	-0.198028	-0.314234	0.0602836	0.0605263	0.0928388	0.0322618	0.305236	-0.278092	0.154008	0.0183083
ENSG00000135766	Q9GZT9	EGLN1	9	0.000873203	-0.115263	0.111992	0.0510692	0.235465	0.087034	0.00691592	0.00507831	0.0960124	0.194106	-0.0349743	-0.0746775	0.0304511	0.158182	0.191805	0.141925	-0.237021	-0.0393533	-0.231614	-0.0931925	-0.223626	0.0206041	-0.343067	0.0612747
ENSG00000135775	Q14746	COG2	6	0.128972	0.398892	-0.632803	0.266179	-0.447645	-0.313679	-0.0499956	-0.00790311	0.293673	-0.287879	0.0638197	0.147169	0.259277	-0.322714	0.0221472	0.0455539	0.48422	-0.00726524	-0.216578	0.0558658	0.295074	-0.0247495	-0.0891239	-0.0605079
ENSG00000135778	Q9BSD7	NTPCR	4	-0.0346461	0.535173	-0.127763	-0.133699	-0.0571982	-0.228076	0.444291	0.0590567	0.575865	0.445695	-0.303311	0.153613	0.585752	0.0886915	0.183847	0.362272	-0.958759	-0.156017	0.0348428	-0.410688	-0.138191	-0.180532	-0.18122	-0.559
ENSG00000135821	P15104	GLUL	1	-0.434575	-0.175639	-0.410018	-0.0335409	-0.22543	-0.0933663	0.220552	-0.182406	-0.0822133	-0.132681	0.114694	0.178888	0.232277	-0.380385	0.294539	-0.0834107	0.202017	0.0295519	0.542468	0.0987721	0.159602	-0.0557227	0.0418597	0.174167
ENSG00000135823	O43752	STX6	9	-0.339139	-0.377669	-0.573099	-0.162234	-0.657129	-0.601776	-0.070625	-0.0406433	-0.171847	-0.122843	0.0977594	0.303103	-0.201751	-0.0939098	0.258356	0.120673	0.0588797	0.417031	0.604072	0.301691	0.268898	0.331505	0.251398	0.399298
ENSG00000135924	P25686	DNAJB2	9	-0.303112	-0.0059072	0.278758	-0.68196	0.590384	0.364056	-0.438219	0.36939	0.0241405	0.476648	0.09748	0.327718	-0.542959	-0.131367	0.269859	0.246235	-0.0939981	0.349841	-0.384336	0.0985674	-0.519983	0.048274	-0.340056	-0.0994545
ENSG00000135932	Q9Y376	CAB39	9	0.130714	-0.262626	0.717264	-0.415481	0.310121	0.160764	-0.225511	0.444641	-0.112649	0.445183	-0.12	0.353439	-0.0749488	0.193365	-0.484689	0.0637174	-0.239766	-0.0786556	-0.0973012	-0.174028	-0.149507	0.0824259	-0.168712	-0.297761
ENSG00000135972	P82933	MRPS9	3	0.471826	0.639605	-0.143259	0.411074	-0.485563	-0.357572	0.156854	0.0866539	0.131165	-0.227276	-0.301946	-0.33171	0.761758	-0.415077	0.17146	0.00101132	-0.145498	-0.190722	-0.0158584	-0.142434	0.115177	0.0636089	-0.219968	-0.0333116
ENSG00000136021	Q6P3W7	SCYL2	9	-0.20898	-0.489439	0.19433	-0.0155959	-0.0207382	0.121363	0.17434	-0.148195	0.108883	0.0256173	0.157386	0.149451	-0.148477	-0.107928	-0.1228	0.0554475	0.15466	0.084572	-0.143866	-0.155886	-0.00682501	-0.00155561	0.210183	0.134053
ENSG00000136040	O60486	PLXNC1	2	-0.906281	-0.550576	1.39858	-1.07785	1.59512	1.58953	-0.597593	-1.25909	-0.280426	-1.98694	0.327711	-0.156332	-1.26794	-1.95125	0.474183	-0.0124691	0.505751	0.884503	-0.0327458	0.646408	0.145753	1.0573	0.708172	0.746504
[truncated: 1,493 more rows]
