# Supplementary material for: Integrated transcriptome and proteome analysis reveals posttranscriptional regulation of ribosomal genes in human brain organoids
Source: eLife. 2023 Mar 29;12:e85135. doi: 10.7554/eLife.85135 (PMC10059687; doi:10.7554/eLife.85135)
Supplement: Figure 5—source data 1. [file elife-85135-fig5-data1.xlsx]

## Sheet: Summary
Table	Information
DGE High.poly TSC2--.vs.TSC2++	Differential gene expression analysis of high polysome fractions in TSC2 -/- and TSC2 +/+
DEG clusters_Highpoly	Clusters of top differentially expressed genes in high polysome fractions in TSC2 -/- and TSC2 +/+
DGE Low.poly TSC2--.vs.TSC2++	Differential gene expression analysis of low polysome fractions in TSC2 -/- and TSC2 +/+
DEG clusters_lowpoly	Clusters of top differentially expressed genes in low polysome fractions in TSC2 -/- and TSC2 +/+
DGE Mono TSC2--.vs.TSC2++	Differential gene expression analysis of Monosome fractions in TSC2 -/- and TSC2 +/+
DEG clusters_Monosome	Clusters of top differentially expressed genes in monosome fractions in TSC2 -/- and TSC2 +/+
DGE TSC2++ High.poly.vsMono	Differential gene expression analysis of high polysome fractions vs Monosome in TSC2 +/+
DGE TSC2-- High.poly.vsMono	Differential gene expression analysis of high polysome fractions vs Monosome in TSC2 -/-

## Sheet: DGE High.poly TSC2--.vs.TSC2++
gene_id	baseMean	log2FoldChange	lfcSE	stat	pvalue	padj	gene_name
ENSG00000000005	4.74367	-1.28047	1.03669	-1.23515	0.216774	0.296779	TNMD
ENSG00000000419	1126.16	0.755201	0.175144	4.3119	1.6186e-05	8.81325e-05	DPM1
ENSG00000000457	94.1264	0.175021	0.27206	0.643317	0.520018	0.605519	SCYL3
ENSG00000000460	141.097	-1.14127	0.260127	-4.38736	1.14733e-05	6.59362e-05	C1orf112
ENSG00000000938	19.191	-1.58531	0.632834	-2.50509	0.012242	0.0260167	FGR
ENSG00000000971	30.6858	-2.24005	0.510209	-4.39045	1.13117e-05	6.52626e-05	CFH
ENSG00000001036	348.181	1.50786	0.168757	8.93512	4.06747e-19	8.84801e-17	FUCA2
ENSG00000001084	196.728	0.0210236	0.205736	0.102187	0.918608	0.939183	GCLC
ENSG00000001167	166.13	-0.176432	0.247766	-0.712092	0.476408	0.563225	NFYA
ENSG00000001460	52.9046	-1.08373	0.392076	-2.76409	0.00570822	0.0135296	STPG1
ENSG00000001461	131.721	-0.403324	0.22853	-1.76486	0.0775873	0.124912	NIPAL3
ENSG00000001497	211.713	0.237649	0.210128	1.13097	0.258066	0.343188	LAS1L
ENSG00000001561	22.6138	0.436035	0.502385	0.86793	0.385432	0.475549	ENPP4
ENSG00000001617	96.7089	-0.142137	0.290644	-0.48904	0.624813	0.699355	SEMA3F
ENSG00000001626	72.9546	-2.48093	0.413654	-5.99759	2.00269e-09	4.26691e-08	CFTR
ENSG00000001629	615.424	-0.215972	0.145422	-1.48514	0.137507	0.203023	ANKIB1
ENSG00000001630	752.269	0.886639	0.206511	4.29342	1.75944e-05	9.49298e-05	CYP51A1
ENSG00000001631	146.061	0.185766	0.221396	0.839067	0.401431	0.491128	KRIT1
ENSG00000002016	262.5	-0.613692	0.194109	-3.16158	0.00156914	0.00442584	RAD52
ENSG00000002330	756.721	0.975654	0.198123	4.92449	8.458e-07	7.27745e-06	BAD
ENSG00000002549	328.516	0.727339	0.19752	3.68236	0.000231084	0.00085287	LAP3
ENSG00000002586	833.343	0.279153	0.212514	1.31357	0.188991	0.264287	CD99
ENSG00000002587	103.411	0.961214	0.307312	3.12781	0.00176112	0.0048968	HS3ST1
ENSG00000002726	30.9355	-1.23823	0.446335	-2.77421	0.00553351	0.0131668	AOC1
ENSG00000002745	9.01576	-0.73868	0.787886	-0.937547	0.348477	0.438709	WNT16
ENSG00000002746	611.613	-0.696289	0.147629	-4.71649	2.39951e-06	1.76975e-05	HECW1
ENSG00000002822	436.23	-0.342344	0.173769	-1.97011	0.0488258	0.0846291	MAD1L1
ENSG00000002834	1094.81	0.892075	0.13627	6.54636	5.89553e-11	2.09857e-09	LASP1
ENSG00000002919	353.988	0.796421	0.19486	4.08714	4.36727e-05	0.000205697	SNX11
ENSG00000002933	9.16304	0.701032	0.803112	0.872894	0.382721	0.472966	TMEM176A
ENSG00000003056	502.008	1.71399	0.196094	8.74062	2.31833e-18	4.58977e-16	M6PR
ENSG00000003096	258.784	-0.357911	0.201941	-1.77235	0.076336	0.12315	KLHL13
ENSG00000003137	102.431	0.550136	0.327133	1.68169	0.0926295	0.145324	CYP26B1
ENSG00000003147	137.13	-0.238808	0.280482	-0.851422	0.394535	0.484709	ICA1
ENSG00000003249	83.4802	0.535944	0.29769	1.80034	0.0718071	0.116957	DBNDD1
ENSG00000003393	247.584	-0.120651	0.194608	-0.619971	0.535277	0.619806	ALS2
ENSG00000003400	59.0408	-1.92047	0.427435	-4.493	7.02255e-06	4.36771e-05	CASP10
ENSG00000003402	111.026	-0.0734743	0.235116	-0.312503	0.754658	0.808431	CFLAR
ENSG00000003436	117.676	0.0717077	1.21602	0.0589693	0.952977	0.965192	TFPI
ENSG00000003509	145.125	0.24227	0.239883	1.00995	0.312519	0.401911	NDUFAF7
ENSG00000003756	581.74	0.251327	0.16729	1.50234	0.13301	0.197308	RBM5
ENSG00000003987	215.044	-0.697659	0.1976	-3.53066	0.000414521	0.00140669	MTMR7
ENSG00000003989	73.8309	-1.38478	0.330764	-4.18661	2.83149e-05	0.000141775	SLC7A2
ENSG00000004059	2788.04	0.701513	0.19769	3.54854	0.000387369	0.0013252	ARF5
ENSG00000004139	297.019	0.348705	0.214497	1.62568	0.104017	0.160363	SARM1
ENSG00000004142	832.882	1.00836	0.206158	4.89121	1.00217e-06	8.40466e-06	POLDIP2
ENSG00000004399	160.33	1.24862	0.305457	4.08771	4.35658e-05	0.000205303	PLXND1
ENSG00000004455	752.048	0.731964	0.164843	4.44037	8.98037e-06	5.36205e-05	AK2
ENSG00000004468	23.8715	-1.73121	0.54623	-3.16939	0.00152762	0.00432883	CD38
ENSG00000004478	1138.66	0.934357	0.129369	7.22244	5.10616e-13	3.4604e-11	FKBP4
ENSG00000004487	779.749	0.194228	0.18279	1.06257	0.287975	0.376186	KDM1A
ENSG00000004534	1309.86	-0.357183	0.151534	-2.35712	0.0184175	0.0368939	RBM6
ENSG00000004660	138.043	0.382018	0.249866	1.52889	0.126291	0.188852	CAMKK1
ENSG00000004700	110.761	-0.652947	0.265972	-2.45495	0.0140905	0.0293643	RECQL
ENSG00000004766	183.47	-0.301353	0.207846	-1.44989	0.14709	0.214688	VPS50
ENSG00000004777	275.752	0.739001	0.200916	3.67816	0.000234925	0.000865074	ARHGAP33
ENSG00000004779	2505.46	0.600934	0.189774	3.16658	0.0015424	0.004363	NDUFAB1
ENSG00000004799	5.98595	-1.31188	0.940008	-1.39561	0.162833	0.233565	PDK4
ENSG00000004809	23.5063	-1.68312	0.604103	-2.78614	0.005334	0.0127663	SLC22A16
ENSG00000004838	14.5917	1.27534	0.648174	1.96759	0.0491157	0.0850535	ZMYND10
ENSG00000004846	170.089	-1.70768	0.24536	-6.95989	3.40535e-12	1.82934e-10	ABCB5
ENSG00000004848	630.635	0.182106	0.182608	0.997253	0.318642	0.407791	ARX
ENSG00000004864	375.622	-0.451368	0.183974	-2.45343	0.0141499	0.0294567	SLC25A13
ENSG00000004866	579.547	0.385268	0.148183	2.59994	0.00932397	0.0206496	ST7
ENSG00000004897	533.009	-0.0410781	0.156182	-0.263014	0.79254	0.839166	CDC27
ENSG00000004939	29.9489	-1.28646	0.478147	-2.69051	0.00713422	0.016402	SLC4A1
ENSG00000004948	73.3286	-1.74536	0.430132	-4.05773	4.95519e-05	0.000228621	CALCR
ENSG00000004961	233.019	1.3498	0.196528	6.86824	6.49976e-12	3.19904e-10	HCCS
ENSG00000004975	362.767	0.988645	0.191698	5.15731	2.50529e-07	2.55477e-06	DVL2
ENSG00000005001	7.22799	-0.443852	0.914258	-0.485478	0.627338	0.701599	PRSS22
ENSG00000005007	267.48	0.295953	0.207737	1.42465	0.154258	0.223141	UPF1
ENSG00000005020	327.994	-1.16296	0.195712	-5.9422	2.8122e-09	5.72843e-08	SKAP2
ENSG00000005022	2432.2	0.985634	0.190403	5.17658	2.2599e-07	2.34923e-06	SLC25A5
ENSG00000005059	249.787	-0.353626	0.196941	-1.7956	0.0725588	0.118018	MCUB
ENSG00000005075	579.715	0.625499	0.185626	3.36967	0.00075258	0.00235198	POLR2J
ENSG00000005100	252.99	0.0977127	0.189437	0.515805	0.605991	0.683189	DHX33
ENSG00000005102	55.9319	-1.50168	0.44641	-3.3639	0.0007685	0.00239367	MEOX1
ENSG00000005108	233.704	-0.448063	0.215377	-2.08037	0.037492	0.0674573	THSD7A
ENSG00000005156	171.69	0.198818	0.213885	0.929556	0.352601	0.442793	LIG3
ENSG00000005175	277.91	0.244061	0.212345	1.14936	0.250406	0.334685	RPAP3
ENSG00000005187	31.1302	-1.13907	0.560938	-2.03066	0.0422896	0.0748962	ACSM3
ENSG00000005189	46.5717	0.315476	0.376551	0.837804	0.402141	0.491889	REXO5
ENSG00000005194	1026.11	1.0822	0.170085	6.36274	1.98192e-10	5.97969e-09	CIAPIN1
ENSG00000005206	265.786	0.604824	0.202437	2.98771	0.00281076	0.00732301	SPPL2B
ENSG00000005238	140.896	1.00246	0.260527	3.8478	0.000119181	0.000482863	FAM214B
ENSG00000005243	14.2035	-0.181189	0.666343	-0.271916	0.785687	0.833462	COPZ2
ENSG00000005249	582.915	0.294984	0.181828	1.62233	0.104734	0.161255	PRKAR2B
ENSG00000005302	347.013	0.375964	0.197016	1.90829	0.0563536	0.0955219	MSL3
ENSG00000005339	1045.44	-0.239186	0.162109	-1.47547	0.140087	0.206204	CREBBP
ENSG00000005379	183.594	0.479881	0.230055	2.08594	0.0369842	0.0666867	TSPOAP1
ENSG00000005381	4.69681	1.73079	1.14263	1.51473	0.12984	0.193437	MPO
ENSG00000005421	18.6763	-1.31026	0.578409	-2.26528	0.0234957	0.0454589	PON1
ENSG00000005436	135.316	0.217287	0.23675	0.917788	0.35873	0.448985	GCFC2
ENSG00000005448	974.336	1.01057	0.174196	5.80136	6.57797e-09	1.16839e-07	WDR54
ENSG00000005469	160.168	0.0253116	0.237222	0.1067	0.915027	0.936328	CROT
ENSG00000005471	27.8659	-1.31602	0.532308	-2.4723	0.0134248	0.0281534	ABCB4
ENSG00000005483	1549.46	0.253192	0.176209	1.43689	0.150749	0.219068	KMT2E
ENSG00000005486	1301.88	1.02432	0.161474	6.34355	2.24537e-10	6.6493e-09	RHBDD2
ENSG00000005513	150.905	-0.392119	0.290334	-1.35058	0.17683	0.250149	SOX8
ENSG00000005700	284.644	-0.427873	0.176668	-2.4219	0.0154396	0.0317513	IBTK
ENSG00000005801	479.845	0.146345	0.147395	0.992876	0.32077	0.409831	ZNF195
ENSG00000005810	720.179	-0.440489	0.161625	-2.72537	0.00642288	0.0149638	MYCBP2
ENSG00000005812	106.534	0.221416	0.257449	0.860038	0.389768	0.479958	FBXL3
ENSG00000005844	168.98	-1.53879	0.276025	-5.57482	2.47781e-08	3.71882e-07	ITGAL
ENSG00000005882	258.137	1.73795	0.253094	6.8668	6.56586e-12	3.22257e-10	PDK2
ENSG00000005884	87.7847	-0.137337	0.276519	-0.496663	0.619427	0.695046	ITGA3
ENSG00000005889	558.711	-0.463533	0.177961	-2.60469	0.00919583	0.0204146	ZFX
ENSG00000005893	440.451	0.815243	0.233418	3.49263	0.000478288	0.00158768	LAMP2
ENSG00000005961	75.2988	-0.75382	0.296958	-2.53848	0.0111336	0.0240174	ITGA2B
ENSG00000005981	28.6696	-2.03023	0.537118	-3.77986	0.000156918	0.000612786	ASB4
ENSG00000006007	506.042	0.552144	0.175779	3.14112	0.00168301	0.0047056	GDE1
ENSG00000006015	832.621	0.404466	0.165825	2.43911	0.0147234	0.0304921	REX1BD
ENSG00000006016	64.5394	-0.834475	0.3144	-2.65418	0.00795004	0.0180236	CRLF1
ENSG00000006025	74.9494	1.00126	0.332608	3.01033	0.00260961	0.0068711	OSBPL7
ENSG00000006042	933.07	0.77112	0.165642	4.65534	3.23442e-06	2.26242e-05	TMEM98
ENSG00000006047	19.046	1.73343	0.601684	2.88097	0.00396454	0.00987073	YBX2
ENSG00000006062	209.545	-0.842564	0.225804	-3.73139	0.000190425	0.000723902	MAP3K14
ENSG00000006071	56.1151	-0.969684	0.329327	-2.94444	0.00323538	0.00826913	ABCC8
ENSG00000006116	134.84	-0.814424	0.26044	-3.12711	0.00176533	0.00490694	CACNG3
ENSG00000006118	707.293	1.16302	0.208066	5.58969	2.27473e-08	3.43746e-07	TMEM132A
ENSG00000006125	1020.71	0.215253	0.163402	1.31732	0.187731	0.262922	AP2B1
ENSG00000006128	1862.95	0.649679	0.759437	0.855474	0.392289	0.482516	TAC1
ENSG00000006194	166.339	0.324186	0.207436	1.56283	0.118093	0.178258	ZNF263
ENSG00000006210	131.772	0.762767	0.255884	2.98091	0.00287395	0.00746447	CX3CL1
ENSG00000006282	102.223	0.758213	0.267068	2.83903	0.00452514	0.0110571	SPATA20
ENSG00000006283	146.972	0.169628	0.26391	0.642747	0.520388	0.60583	CACNA1G
ENSG00000006327	41.1211	0.612327	0.519259	1.17923	0.238306	0.320939	TNFRSF12A
ENSG00000006377	623.031	-0.358133	0.664103	-0.539272	0.589699	0.668586	DLX6
ENSG00000006432	457.698	0.424119	0.167552	2.53126	0.0113652	0.0244243	MAP3K9
ENSG00000006451	1127.23	0.351503	0.154326	2.27766	0.0227466	0.0442622	RALA
ENSG00000006453	266.661	-1.23216	0.272586	-4.52024	6.1769e-06	3.92347e-05	BAIAP2L1
ENSG00000006459	304.481	-0.312584	0.178717	-1.74905	0.0802831	0.128728	KDM7A
ENSG00000006468	153.913	-1.25148	0.265391	-4.71561	2.40984e-06	1.77514e-05	ETV1
ENSG00000006530	328.31	0.144094	0.169249	0.851374	0.394562	0.484709	AGK
ENSG00000006534	11.1887	0.187186	0.740732	0.252704	0.800497	0.845609	ALDH3B1
ENSG00000006555	10.5076	-0.867893	0.713504	-1.21638	0.223839	0.304669	TTC22
ENSG00000006576	495.173	-0.610384	0.153189	-3.98452	6.76169e-05	0.000297036	PHTF2
ENSG00000006606	53.5288	-1.84456	0.440774	-4.18483	2.85375e-05	0.000142688	CCL26
ENSG00000006607	378.343	-0.49626	0.186478	-2.66123	0.00778555	0.0177031	FARP2
ENSG00000006611	12.5529	-2.0189	0.713425	-2.82986	0.00465677	0.0113379	USH1C
ENSG00000006625	612.053	1.10663	0.196392	5.63478	1.75281e-08	2.75018e-07	GGCT
ENSG00000006634	313.189	-0.0883717	0.192309	-0.45953	0.645854	0.717086	DBF4
ENSG00000006638	37.6154	-1.68269	0.462543	-3.63792	0.000274845	0.000991354	TBXA2R
ENSG00000006652	467.262	0.696607	0.167176	4.16692	3.08749e-05	0.0001529	IFRD1
ENSG00000006695	213.859	-0.361477	0.187313	-1.9298	0.0536315	0.091604	COX10
ENSG00000006704	1010.29	-0.353945	0.183242	-1.93157	0.053412	0.0912873	GTF2IRD1
ENSG00000006712	812.135	0.709471	0.15451	4.59174	4.39565e-06	2.93043e-05	PAF1
ENSG00000006715	540.945	0.32209	0.171525	1.87781	0.0604077	0.101168	VPS41
ENSG00000006740	295.153	-0.57776	0.198804	-2.90618	0.00365877	0.00920307	ARHGAP44
ENSG00000006744	281.952	0.71877	0.172924	4.15657	3.23063e-05	0.000158758	ELAC2
ENSG00000006747	43.9319	-1.76992	0.502045	-3.52542	0.000422817	0.00143077	SCIN
ENSG00000006756	203.825	-0.038268	0.227011	-0.168573	0.866132	0.896929	ARSD
ENSG00000006757	61.0425	0.19776	0.314447	0.628912	0.529406	0.613936	PNPLA4
ENSG00000006788	49.9267	-1.78836	0.578421	-3.0918	0.00198949	0.00543738	MYH13
ENSG00000006831	435.751	-0.102604	0.17468	-0.587385	0.556945	0.639266	ADIPOR2
ENSG00000006837	36.5696	-0.147146	0.421949	-0.348729	0.727292	0.786226	CDKL3
ENSG00000007001	210.911	-1.37562	0.243624	-5.64649	1.63754e-08	2.59473e-07	UPP2
ENSG00000007047	476.585	0.0425285	0.164507	0.258521	0.796005	0.842126	MARK4
ENSG00000007062	160.41	-1.04901	0.275703	-3.80487	0.000141879	0.00055864	PROM1
ENSG00000007080	1630.07	0.949985	0.184005	5.16281	2.4327e-07	2.49645e-06	CCDC124
ENSG00000007129	16.7506	-2.01887	0.646125	-3.12458	0.00178058	0.00494387	CEACAM21
ENSG00000007168	2015.16	0.259767	0.125665	2.06714	0.0387212	0.069432	PAFAH1B1
ENSG00000007171	28.4342	-1.61406	0.548047	-2.9451	0.00322848	0.00825509	NOS2
ENSG00000007174	449.246	-1.31522	0.243105	-5.41008	6.2996e-08	8.10211e-07	DNAH9
ENSG00000007202	306.241	0.18095	0.178665	1.01279	0.311162	0.400663	KIAA0100
ENSG00000007237	743.888	-0.692225	0.175346	-3.94777	7.88813e-05	0.000339743	GAS7
ENSG00000007255	676.839	1.12299	0.16558	6.78215	1.18397e-11	5.33543e-10	TRAPPC6A
ENSG00000007264	59.9821	-1.34825	0.357108	-3.77546	0.000159715	0.000621369	MATK
ENSG00000007306	34.082	-1.53447	0.455252	-3.3706	0.000750045	0.00234489	CEACAM7
ENSG00000007312	3.44965	-0.644721	1.16296	-0.554378	0.57932	0.659322	CD79B
ENSG00000007314	24.328	-1.06492	0.491542	-2.16649	0.030274	0.0562332	SCN4A
ENSG00000007341	413.388	-0.374469	0.1721	-2.17588	0.0295641	0.0551062	ST7L
ENSG00000007350	155.04	-0.113557	0.245736	-0.46211	0.644003	0.715801	TKTL1
ENSG00000007372	1703.2	1.00599	0.176524	5.69889	1.2059e-08	1.99324e-07	PAX6
ENSG00000007376	181.783	1.14434	0.216577	5.28375	1.26566e-07	1.45093e-06	RPUSD1
ENSG00000007384	24.9713	0.801461	0.555813	1.44196	0.149313	0.217447	RHBDF1
ENSG00000007392	1089.78	0.0917464	0.155806	0.588849	0.555963	0.638471	LUC7L
ENSG00000007402	205.884	-0.24541	0.233193	-1.05239	0.29262	0.381245	CACNA2D2
ENSG00000007516	72.636	0.584048	0.300245	1.94524	0.0517464	0.0888666	BAIAP3
ENSG00000007520	412.23	1.09401	0.246409	4.4398	9.00416e-06	5.37443e-05	TSR3
ENSG00000007541	378.3	1.02175	0.208552	4.89926	9.61966e-07	8.11774e-06	PIGQ
ENSG00000007545	264.31	0.373772	0.204058	1.83169	0.0669973	0.11045	CRAMP1
ENSG00000007866	122.592	0.158568	0.233842	0.678101	0.497708	0.584251	TEAD3
ENSG00000007923	384.02	0.105071	0.185351	0.566875	0.570799	0.652279	DNAJC11
ENSG00000007933	13.6391	-2.61509	0.784898	-3.33175	0.000863006	0.00263996	FMO3
ENSG00000007944	129.221	1.00555	0.364294	2.76026	0.00577554	0.0136689	MYLIP
ENSG00000007952	52.1406	-1.41553	0.347516	-4.07329	4.63537e-05	0.000216244	NOX1
ENSG00000007968	293.038	-0.165624	0.251906	-0.657483	0.510871	0.596919	E2F2
ENSG00000008018	3774.62	0.705309	0.153185	4.60431	4.13841e-06	2.78955e-05	PSMB1
ENSG00000008056	136.807	0.322482	0.225344	1.43106	0.152413	0.220957	SYN1
ENSG00000008083	1049.51	-0.302931	0.127472	-2.37645	0.0174801	0.0352765	JARID2
ENSG00000008086	592.993	-0.484983	0.16386	-2.95975	0.00307891	0.0079267	CDKL5
ENSG00000008118	51.7371	1.10518	0.348086	3.17502	0.00149824	0.00425791	CAMK1G
ENSG00000008128	200.394	0.428814	0.215248	1.99219	0.0463505	0.0809813	CDK11A
ENSG00000008130	237.273	0.0717885	0.184177	0.389779	0.6967	0.760586	NADK
ENSG00000008196	37.7142	0.448258	0.512725	0.874265	0.381974	0.47234	TFAP2B
ENSG00000008197	20.6313	-1.06141	0.535468	-1.98221	0.0474562	0.0826099	TFAP2D
ENSG00000008226	39.672	-1.70356	0.462952	-3.67977	0.000233446	0.000860285	DLEC1
ENSG00000008256	541.331	-0.478229	0.162564	-2.94179	0.00326316	0.00833076	CYTH3
ENSG00000008277	349.275	-0.441849	0.163669	-2.69965	0.00694128	0.016019	ADAM22
ENSG00000008282	249.467	0.575927	0.27215	2.11621	0.0343268	0.062645	SYPL1
ENSG00000008283	90.0836	1.15769	0.30797	3.75912	0.000170514	0.000658114	CYB561
ENSG00000008294	1511.96	-0.00804678	0.141382	-0.0569152	0.954613	0.966294	SPAG9
ENSG00000008300	263.672	0.106235	0.214434	0.495419	0.620305	0.695765	CELSR3
ENSG00000008311	152.684	-0.208667	0.22472	-0.928568	0.353113	0.443215	AASS
ENSG00000008323	21.6899	-1.06543	0.519561	-2.05063	0.0403031	0.0719203	PLEKHG6
ENSG00000008324	401.313	0.779404	0.223934	3.48051	0.000500464	0.00165134	SS18L2
ENSG00000008382	223.729	0.916438	0.26131	3.50709	0.000453033	0.00151671	MPND
ENSG00000008394	336.529	0.693935	0.277563	2.5001	0.0124158	0.0263257	MGST1
ENSG00000008405	497.683	0.219207	0.154132	1.4222	0.154967	0.22396	CRY1
ENSG00000008441	92.9623	-0.932332	0.378	-2.46649	0.0136446	0.028561	NFIX
ENSG00000008513	292.734	-0.313608	0.235854	-1.32967	0.183628	0.25816	ST3GAL1
ENSG00000008516	7.41072	-0.0514687	0.868046	-0.0592926	0.952719	0.965098	MMP25
ENSG00000008517	18.855	-0.190707	0.545532	-0.34958	0.726654	0.785644	IL32
ENSG00000008710	284.054	0.173312	0.219882	0.788202	0.430579	0.520107	PKD1
ENSG00000008735	550.356	0.998114	0.199155	5.01175	5.39381e-07	4.93709e-06	MAPK8IP2
ENSG00000008838	593.07	0.473194	0.152269	3.10763	0.00188596	0.00520366	MED24
ENSG00000008853	445.609	0.830562	0.202688	4.09773	4.17225e-05	0.000197409	RHOBTB2
ENSG00000008869	269.507	-0.839582	0.225916	-3.71635	0.000202121	0.000760651	HEATR5B
ENSG00000008952	2746.3	0.760512	0.12516	6.07631	1.22976e-09	2.81339e-08	SEC62
ENSG00000008988	3246.45	0.238835	0.150255	1.58953	0.111941	0.170357	RPS20
ENSG00000009307	2037.42	0.482091	0.155644	3.0974	0.00195226	0.00535391	CSDE1
ENSG00000009335	657.965	-0.203384	0.142289	-1.42937	0.152898	0.221515	UBE3C
ENSG00000009413	611.934	-0.559834	0.169595	-3.30101	0.000963385	0.0029002	REV3L
ENSG00000009694	226.974	-1.17547	0.262815	-4.47262	7.72671e-06	4.74537e-05	TENM1
ENSG00000009709	68.4996	-1.78303	0.353169	-5.04865	4.44948e-07	4.16577e-06	PAX7
ENSG00000009724	72.465	-1.35312	0.350655	-3.85883	0.000113931	0.000465122	MASP2
ENSG00000009765	19.4608	-1.63065	0.612392	-2.66276	0.00775038	0.0176345	IYD
ENSG00000009780	227.038	-0.0239187	0.181074	-0.132093	0.89491	0.919811	FAM76A
ENSG00000009790	5.40162	-1.80711	1.04605	-1.72755	0.0840683	0.133618	TRAF3IP3
ENSG00000009830	148.367	0.438641	0.27448	1.59808	0.110026	0.167922	POMT2
ENSG00000009844	939.216	0.85927	0.169188	5.07879	3.79856e-07	3.64546e-06	VTA1
ENSG00000009950	89.6419	-1.33993	0.322968	-4.14881	3.34214e-05	0.000163534	MLXIPL
ENSG00000009954	808.085	-0.519459	0.150449	-3.45273	0.000554947	0.00180376	BAZ1B
ENSG00000010017	618.863	0.282965	0.148721	1.90266	0.0570846	0.0965566	RANBP9
ENSG00000010030	31.9052	-1.51613	0.543852	-2.78777	0.00530721	0.0127138	ETV7
ENSG00000010072	179.88	0.356497	0.205172	1.73755	0.0822906	0.131301	SPRTN
ENSG00000010165	272.382	0.691249	0.174543	3.96035	7.484e-05	0.000324479	METTL13
ENSG00000010219	300.026	1.22294	0.186301	6.56432	5.22712e-11	1.92279e-09	DYRK4
ENSG00000010244	902.419	0.48631	0.161984	3.00221	0.00268027	0.00702983	ZNF207
ENSG00000010256	2471.72	0.945261	0.14628	6.46201	1.03319e-10	3.44789e-09	UQCRC1
ENSG00000010270	502.194	0.956522	0.193595	4.94085	7.77847e-07	6.7802e-06	STARD3NL
ENSG00000010278	199.789	0.345541	0.404982	0.853224	0.393535	0.483785	CD9
ENSG00000010292	325.102	-0.494312	0.179686	-2.75097	0.00594187	0.014008	NCAPD2
ENSG00000010295	146.829	0.575708	0.243764	2.36175	0.0181891	0.0364859	IFFO1
ENSG00000010310	53.1169	-0.640353	0.398426	-1.60721	0.108008	0.165344	GIPR
ENSG00000010318	67.1304	0.155504	0.303791	0.511877	0.608737	0.685495	PHF7
ENSG00000010322	430.376	0.551361	0.162825	3.38623	0.000708608	0.00223517	NISCH
ENSG00000010327	13.052	-1.14768	0.703694	-1.63094	0.102903	0.158951	STAB1
ENSG00000010361	300.98	0.78015	0.185687	4.20144	2.65226e-05	0.000134463	FUZ
ENSG00000010379	31.3935	-1.49608	0.453695	-3.29754	0.000975363	0.00293104	SLC6A13
ENSG00000010404	311.168	0.72891	0.202824	3.5938	0.000325892	0.00114684	IDS
ENSG00000010438	104.082	-1.84056	0.262253	-7.01828	2.24611e-12	1.2927e-10	PRSS3
ENSG00000010539	160.908	0.265005	0.242136	1.09445	0.273758	0.360537	ZNF200
ENSG00000010610	106.515	-1.04535	0.26679	-3.91823	8.92012e-05	0.000377728	CD4
ENSG00000010626	145.415	-0.0377445	0.229065	-0.164776	0.86912	0.899548	LRRC23
ENSG00000010671	61.2196	-1.07341	0.436748	-2.45773	0.0139818	0.0291697	BTK
ENSG00000010704	16.8266	-0.88498	0.640062	-1.38265	0.166773	0.23821	HFE
ENSG00000010803	508.368	-0.52738	0.164828	-3.19958	0.00137628	0.00395144	SCMH1
ENSG00000010810	1611.7	0.0269209	0.157059	0.171406	0.863905	0.89499	FYN
ENSG00000010818	219.257	-0.759771	0.188932	-4.02139	5.78548e-05	0.00026105	HIVEP2
ENSG00000010932	262.024	-0.155627	0.194907	-0.798467	0.424599	0.513977	FMO1
ENSG00000011007	298.733	-0.485714	0.193229	-2.51367	0.0119482	0.0254906	ELOA
ENSG00000011009	831.498	1.22166	0.199071	6.1368	8.41988e-10	2.05482e-08	LYPLA2
ENSG00000011021	217.459	0.269391	0.184756	1.45809	0.144816	0.211914	CLCN6
ENSG00000011028	515.926	-0.0404217	0.192124	-0.210394	0.83336	0.871288	MRC2
ENSG00000011052	831.536	1.5044	0.217982	6.9015	5.14568e-12	2.60537e-10	NME1-NME2
ENSG00000011083	23.1819	0.642425	0.497811	1.2905	0.196877	0.273578	SLC6A7
ENSG00000011105	493.404	-0.754791	0.184902	-4.08211	4.46284e-05	0.000209582	TSPAN9
ENSG00000011114	506.245	-0.338065	0.154736	-2.18478	0.0289049	0.0540834	BTBD7
ENSG00000011132	105.068	0.702061	0.259636	2.70402	0.00685069	0.0158307	APBA3
ENSG00000011143	210.526	0.816142	0.204674	3.98752	6.67665e-05	0.000293959	MKS1
ENSG00000011198	297.954	0.57564	0.181013	3.18011	0.00147222	0.00419477	ABHD5
ENSG00000011201	375.576	-0.0738792	0.200329	-0.36879	0.712285	0.773644	ANOS1
ENSG00000011243	414.024	0.261485	0.210976	1.23941	0.215194	0.295052	AKAP8L
ENSG00000011258	457.029	-0.685343	0.15926	-4.30331	1.68268e-05	9.12499e-05	MBTD1
ENSG00000011260	561.442	0.575732	0.158216	3.6389	0.00027381	0.000988173	UTP18
ENSG00000011275	906.4	-0.186288	0.143291	-1.30007	0.193578	0.269505	RNF216
ENSG00000011295	565.435	0.13921	0.15501	0.898074	0.369146	0.459185	TTC19
ENSG00000011304	732.081	0.256006	0.193754	1.32129	0.186404	0.261417	PTBP1
ENSG00000011332	597.792	0.468096	0.232914	2.00974	0.0444592	0.0781808	DPF1
ENSG00000011347	150.198	0.447666	0.269198	1.66296	0.096321	0.150073	SYT7
ENSG00000011376	276.114	-0.569304	0.179559	-3.17058	0.00152136	0.00431525	LARS2
ENSG00000011405	541.383	-0.306997	0.159779	-1.92139	0.0546827	0.0931647	PIK3C2A
ENSG00000011422	161.129	-0.344037	0.21321	-1.61361	0.106613	0.163576	PLAUR
ENSG00000011426	187.9	-0.465043	0.207298	-2.24335	0.024874	0.0476651	ANLN
ENSG00000011451	331.303	0.469667	0.203658	2.30616	0.0211017	0.0415664	WIZ
ENSG00000011454	834.33	-0.105199	0.153127	-0.687002	0.492081	0.578649	RABGAP1
ENSG00000011465	544.498	1.85244	1.50123	1.23394	0.217224	0.29735	DCN
ENSG00000011478	70.4523	-0.50792	0.294268	-1.72605	0.084339	0.133927	QPCTL
ENSG00000011485	991.148	0.864432	0.164896	5.24229	1.58597e-07	1.74378e-06	PPP5C
ENSG00000011523	423.391	0.0933078	0.176514	0.528614	0.597073	0.675079	CEP68
ENSG00000011566	630.965	-0.410243	0.160712	-2.55266	0.0106905	0.0231893	MAP4K3
ENSG00000011590	52.9236	-0.833521	0.371315	-2.24478	0.0247822	0.0475201	ZBTB32
ENSG00000011600	8.44706	-2.14884	0.857489	-2.50597	0.0122117	0.0259743	TYROBP
ENSG00000011638	153.399	0.151048	0.231238	0.653216	0.513617	0.599549	TMEM159
ENSG00000011677	255.672	-0.617275	0.198343	-3.11215	0.00185729	0.00513581	GABRA3
ENSG00000012048	366.812	-1.06179	0.174154	-6.09687	1.08166e-09	2.51768e-08	BRCA1
ENSG00000012061	1086	0.406349	0.154979	2.62197	0.00874239	0.0195558	ERCC1
ENSG00000012124	47.7027	-1.37771	0.395871	-3.4802	0.000501047	0.00165296	CD22
ENSG00000012171	60.8599	1.03967	0.378598	2.74612	0.00603055	0.0141867	SEMA3B
ENSG00000012174	206.429	0.237865	0.23235	1.02373	0.305961	0.395209	MBTPS2
ENSG00000012211	20.1039	-0.9867	0.628619	-1.56963	0.116501	0.176232	PRICKLE3
ENSG00000012223	11.8885	-2.79543	0.794514	-3.51841	0.000434142	0.00146291	LTF
ENSG00000012232	866.558	-0.544419	0.14686	-3.70706	0.000209679	0.000785573	EXTL3
ENSG00000012504	50.0941	-2.35693	0.440412	-5.35165	8.71559e-08	1.06423e-06	NR1H4
ENSG00000012660	739.77	0.938574	0.168648	5.5653	2.61708e-08	3.89751e-07	ELOVL5
ENSG00000012779	25.7433	-1.22421	0.545594	-2.24382	0.0248443	0.0476236	ALOX5
ENSG00000012817	3.09408	-1.39298	1.27736	-1.09051	0.275488	0.36257	KDM5D
ENSG00000012822	116.207	0.679372	0.265213	2.5616	0.010419	0.0226897	CALCOCO1
ENSG00000012963	436.175	0.475767	0.193145	2.46327	0.0137677	0.0287801	UBR7
ENSG00000012983	503.248	-0.130922	0.14586	-0.897588	0.369405	0.459443	MAP4K5
ENSG00000013016	149.945	0.835224	0.227185	3.67641	0.000236536	0.000869915	EHD3
ENSG00000013275	1472.3	0.90659	0.152202	5.95651	2.57685e-09	5.30422e-08	PSMC4
ENSG00000013288	187.642	0.70376	0.200911	3.50285	0.000460314	0.00153583	MAN2B2
ENSG00000013293	22.8546	0.854612	0.520378	1.64229	0.10053	0.15579	SLC7A14
ENSG00000013297	43.681	0.806987	0.541066	1.49148	0.135837	0.200961	CLDN11
ENSG00000013306	263.305	1.05514	0.180018	5.8613	4.59256e-09	8.59946e-08	SLC25A39
ENSG00000013364	66.3116	-0.674206	0.34134	-1.97518	0.0482482	0.0837487	MVP
ENSG00000013374	465.133	0.11791	0.158536	0.743744	0.457031	0.545848	NUB1
ENSG00000013375	208.133	0.626353	0.232639	2.69238	0.00709438	0.0163147	PGM3
ENSG00000013392	123.462	1.16279	0.237213	4.90186	9.49327e-07	8.03031e-06	RWDD2A
ENSG00000013441	572.923	0.0867472	0.1669	0.519755	0.603234	0.68056	CLK1
ENSG00000013503	181.95	-0.56214	0.212022	-2.65132	0.00801777	0.0181515	POLR3B
ENSG00000013523	125.137	-0.693353	0.228251	-3.03767	0.00238413	0.00636201	ANGEL1
ENSG00000013561	163.614	1.10918	0.222478	4.98557	6.1778e-07	5.57077e-06	RNF14
ENSG00000013563	41.6799	0.534974	0.363354	1.47232	0.140934	0.207162	DNASE1L1
ENSG00000013573	101.956	0.021435	0.270321	0.0792944	0.936798	0.95319	DDX11
ENSG00000013583	211.907	1.04713	0.208488	5.0225	5.10038e-07	4.70763e-06	HEBP1
ENSG00000013588	52.4318	-1.37257	0.372261	-3.68712	0.000226809	0.000839045	GPRC5A
ENSG00000013619	230.658	0.136483	0.18995	0.718522	0.472435	0.559467	MAMLD1
ENSG00000013725	38.2931	-1.45032	0.497184	-2.91708	0.00353331	0.00893597	CD6
ENSG00000013810	544.963	0.0384312	0.157094	0.244638	0.806737	0.850518	TACC3
ENSG00000014123	108.017	-0.391215	0.280359	-1.39541	0.162893	0.233595	UFL1
ENSG00000014138	122.826	0.20138	0.243383	0.82742	0.407999	0.498125	POLA2
ENSG00000014164	191.413	-0.019239	0.203855	-0.0943761	0.92481	0.943389	ZC3H3
ENSG00000014216	475.87	0.869401	0.185157	4.69548	2.65978e-06	1.92782e-05	CAPN1
ENSG00000014257	46.1313	-1.66809	0.468523	-3.56031	0.000370414	0.00127824	ACPP
ENSG00000014641	2152.47	0.80732	0.192865	4.18594	2.83994e-05	0.000142078	MDH1
ENSG00000014824	710.178	-0.0106217	0.160555	-0.0661563	0.947253	0.960997	SLC30A9
ENSG00000014914	10.7152	0.425498	0.731922	0.581343	0.56101	0.642828	MTMR11
ENSG00000014919	207.325	0.312172	0.191616	1.62916	0.10328	0.159435	COX15
ENSG00000015133	274.142	-0.454448	0.177231	-2.56416	0.0103425	0.0225398	CCDC88C
ENSG00000015153	592.535	-0.025062	0.156831	-0.159803	0.873037	0.902806	YAF2
ENSG00000015171	396.453	-0.162295	0.164692	-0.985445	0.324405	0.413725	ZMYND11
ENSG00000015285	18.9475	-0.260487	0.530463	-0.491055	0.623387	0.698333	WAS
ENSG00000015413	33.3717	-0.758561	0.452155	-1.67766	0.0934137	0.146294	DPEP1
ENSG00000015475	451.371	-0.116377	0.188624	-0.616977	0.53725	0.621559	BID
ENSG00000015479	734.024	0.477746	0.193701	2.46641	0.0136475	0.0285628	MATR3
ENSG00000015520	26.5995	-1.5868	0.523387	-3.0318	0.00243104	0.00647249	NPC1L1
ENSG00000015532	130.721	0.405647	0.237563	1.70753	0.0877228	0.138464	XYLT2
ENSG00000015568	329.019	-0.862338	0.185331	-4.65297	3.2719e-06	2.2832e-05	RGPD5
ENSG00000015592	5895.89	1.23637	0.176783	6.99372	2.67682e-12	1.4832e-10	STMN4
ENSG00000015676	863.36	0.237238	0.151303	1.56797	0.116889	0.176667	NUDCD3
ENSG00000016082	166.102	2.43495	0.403526	6.0342	1.59755e-09	3.53184e-08	ISL1
ENSG00000016391	41.9267	-0.285815	0.380559	-0.751041	0.452628	0.541654	CHDH
ENSG00000016402	26.5586	-1.99953	0.593915	-3.3667	0.000760736	0.00237326	IL20RA
ENSG00000016490	9.86485	-1.88519	0.825553	-2.28355	0.0223978	0.0437139	CLCA1
ENSG00000016602	10.4038	-2.0377	0.794287	-2.56545	0.0103042	0.0224675	CLCA4
ENSG00000016864	388.802	0.715545	0.174164	4.10846	3.98314e-05	0.00018994	GLT8D1
ENSG00000017260	630.492	0.23162	0.143739	1.61139	0.107095	0.164145	ATP2C1
ENSG00000017427	13.8333	-0.929861	0.647311	-1.4365	0.15086	0.219193	IGF1
ENSG00000017483	27.1543	0.228097	0.469036	0.486311	0.626747	0.70116	SLC38A5
ENSG00000017797	413.168	0.383162	0.170152	2.25188	0.0243298	0.0467849	RALBP1
ENSG00000018189	1619.4	0.348667	0.139621	2.49724	0.0125163	0.0265197	RUFY3
ENSG00000018236	338.104	-0.837384	0.182049	-4.59976	4.22982e-06	2.84355e-05	CNTN1
ENSG00000018280	27.3618	-1.91266	0.5632	-3.39606	0.000683638	0.00216571	SLC11A1
ENSG00000018408	269.9	-1.46497	0.249905	-5.86209	4.57089e-09	8.57121e-08	WWTR1
ENSG00000018510	346.239	-0.197478	0.162106	-1.21821	0.223146	0.30392	AGPS
ENSG00000018610	363.692	0.285432	0.208641	1.36806	0.171294	0.243717	CXorf56
ENSG00000018625	35.6401	-1.46589	0.436407	-3.35899	0.000782285	0.00243016	ATP1A2
ENSG00000018699	348.667	-1.01423	0.246008	-4.12276	3.74362e-05	0.000180176	TTC27
ENSG00000018869	71.7686	0.265631	0.284341	0.934198	0.350202	0.440439	ZNF582
ENSG00000019102	26.4487	-1.68589	0.484083	-3.48265	0.000496478	0.00164126	VSIG2
ENSG00000019144	254.462	0.542203	0.245671	2.20703	0.027312	0.051563	PHLDB1
ENSG00000019169	16.4875	-1.06909	0.621826	-1.71927	0.0855651	0.135544	MARCO
ENSG00000019186	14.4223	-1.78965	0.662631	-2.70083	0.00691672	0.0159686	CYP24A1
ENSG00000019485	122.551	-0.948189	0.241848	-3.9206	8.83277e-05	0.000374659	PRDM11
ENSG00000019505	464.549	1.61619	0.24123	6.69977	2.08754e-11	8.57402e-10	SYT13
ENSG00000019549	64.2368	0.564901	1.56179	0.361701	0.717575	0.777929	SNAI2
ENSG00000019582	62.0891	1.56047	0.413866	3.77046	0.000162945	0.000631702	CD74
ENSG00000019991	31.2917	-1.24821	0.628652	-1.98553	0.0470858	0.0820544	HGF
ENSG00000019995	280.129	-0.258702	0.178161	-1.45207	0.146483	0.213947	ZRANB1
ENSG00000020129	380.254	0.942389	0.193549	4.86899	1.12169e-06	9.2442e-06	NCDN
ENSG00000020181	75.8674	-1.03014	0.364914	-2.82298	0.00475797	0.0115603	ADGRA2
ENSG00000020256	650.277	-0.734923	0.150973	-4.86791	1.12786e-06	9.27967e-06	ZFP64
ENSG00000020426	688.283	0.230607	0.169396	1.36134	0.173405	0.246224	MNAT1
ENSG00000020577	286.461	-1.27786	0.18753	-6.81415	9.48203e-12	4.44344e-10	SAMD4A
ENSG00000020633	24.3879	-1.45853	0.619281	-2.3552	0.0185128	0.0370562	RUNX3
ENSG00000020922	119.132	-0.899528	0.263048	-3.41963	0.000627065	0.0020067	MRE11
ENSG00000021300	67.2277	0.95712	0.318989	3.00048	0.00269551	0.00706664	PLEKHB1
ENSG00000021355	15.8143	0.101029	0.56836	0.177755	0.858916	0.891027	SERPINB1
ENSG00000021461	30.5063	-2.00239	0.513953	-3.89606	9.77693e-05	0.000407545	CYP3A43
ENSG00000021488	61.6039	-1.49564	0.422374	-3.54104	0.00039855	0.00135936	SLC7A9
ENSG00000021574	867.852	-0.251624	0.140814	-1.78692	0.0739502	0.119927	SPAST
ENSG00000021645	2079.67	-1.01856	0.18656	-5.45972	4.76888e-08	6.39967e-07	NRXN3
ENSG00000021762	225.493	0.137662	0.217449	0.633076	0.526684	0.611665	OSBPL5
ENSG00000021776	290.114	-0.773708	0.194583	-3.97624	7.00135e-05	0.000305962	AQR
ENSG00000021826	101.795	-1.06504	0.343831	-3.09757	0.00195117	0.00535232	CPS1
ENSG00000021852	13.4081	-2.61336	0.773469	-3.37876	0.000728146	0.00228738	C8B
ENSG00000022267	1820.05	0.488754	0.157065	3.1118	0.0018595	0.00513951	FHL1
ENSG00000022277	1748.6	1.02709	0.169907	6.045	1.49413e-09	3.34518e-08	RTF2
ENSG00000022355	16.2777	-1.96747	0.628043	-3.1327	0.00173205	0.00482206	GABRA1
ENSG00000022556	104.474	-1.95314	0.370413	-5.27288	1.34296e-07	1.52468e-06	NLRP2
ENSG00000022567	134.096	-0.219156	0.23169	-0.945901	0.344199	0.43421	SLC45A4
ENSG00000022840	1133.65	0.659902	0.176873	3.73094	0.000190766	0.000724728	RNF10
ENSG00000022976	112.897	-0.520899	0.243957	-2.13521	0.0327442	0.0601117	ZNF839
ENSG00000023041	208.693	0.344518	0.234091	1.47173	0.141094	0.207346	ZDHHC6
ENSG00000023171	357.242	-0.921651	0.206918	-4.45418	8.42156e-06	5.09137e-05	GRAMD1B
ENSG00000023191	949.759	1.0644	0.186384	5.71076	1.12471e-08	1.88199e-07	RNH1
ENSG00000023228	402.274	-0.171044	0.172059	-0.994103	0.320173	0.409216	NDUFS1
ENSG00000023287	682.706	-0.400205	0.159188	-2.51404	0.0119358	0.0254703	RB1CC1
ENSG00000023318	440.112	0.242543	0.162751	1.49026	0.136155	0.201356	ERP44
ENSG00000023330	280.152	0.692413	0.172491	4.01419	5.96493e-05	0.000267571	ALAS1
ENSG00000023445	12.9177	-1.94204	0.705151	-2.75408	0.00588581	0.0138982	BIRC3
ENSG00000023516	237.246	-0.191203	0.223263	-0.856401	0.391776	0.481958	AKAP11
ENSG00000023572	497.647	0.42983	0.198268	2.16792	0.0301647	0.0560775	GLRX2
ENSG00000023608	223.961	0.514972	0.204454	2.51877	0.0117767	0.0251704	SNAPC1
ENSG00000023697	334.344	0.255651	0.193311	1.32249	0.186005	0.261044	DERA
ENSG00000023734	2279.66	0.671088	0.171812	3.90594	9.38587e-05	0.000394323	STRAP
ENSG00000023839	35.3075	-1.86978	0.468939	-3.98725	6.68436e-05	0.000294078	ABCC2
ENSG00000023892	32.1566	-0.098493	0.428485	-0.229863	0.818198	0.859208	DEF6
ENSG00000023902	817.074	0.471778	0.224338	2.10298	0.0354677	0.0643805	PLEKHO1
ENSG00000023909	175.577	0.339911	0.213458	1.5924	0.111295	0.16955	GCLM
ENSG00000024048	390.189	-0.786282	0.165015	-4.76492	1.88924e-06	1.44544e-05	UBR2
ENSG00000024422	65.5543	-0.3556	0.443707	-0.80143	0.422883	0.512303	EHD2
ENSG00000024526	78.1729	-0.291461	0.354925	-0.821191	0.411538	0.501437	DEPDC1
ENSG00000024862	125.976	-0.299744	0.238829	-1.25506	0.209458	0.288333	CCDC28A
ENSG00000025039	307.736	0.699285	0.205498	3.40288	0.000666786	0.00211842	RRAGD
ENSG00000025156	383.273	0.405895	0.164387	2.46915	0.0135435	0.0283787	HSF2
ENSG00000025293	1305.23	-0.295786	0.125458	-2.35765	0.0183909	0.0368487	PHF20
ENSG00000025423	89.5703	-1.46654	0.393598	-3.72599	0.000194548	0.0007364	HSD17B6
ENSG00000025434	131.478	-0.173249	0.247954	-0.698715	0.48473	0.571492	NR1H3
ENSG00000025708	49.8022	0.214298	0.348359	0.615164	0.538447	0.622576	TYMP
ENSG00000025770	474.867	0.390402	0.227606	1.71525	0.0862991	0.136488	NCAPH2
ENSG00000025772	233.147	1.14279	0.236361	4.83491	1.33206e-06	1.06831e-05	TOMM34
ENSG00000025796	973.047	0.111918	0.133494	0.838381	0.401817	0.491565	SEC63
ENSG00000025800	1497.69	0.64147	0.147423	4.35123	1.35374e-05	7.56336e-05	KPNA6
ENSG00000026025	6113.09	0.207706	0.126651	1.63999	0.101008	0.156421	VIM
ENSG00000026036	5.81423	1.19299	0.945337	1.26197	0.20696	0.285406	RTEL1-TNFRSF6B
ENSG00000026103	17.5297	-0.646125	0.630997	-1.02397	0.305848	0.395131	FAS
ENSG00000026297	361.634	1.68014	0.248403	6.76377	1.34443e-11	5.89277e-10	RNASET2
ENSG00000026508	56.3894	-1.41718	0.39257	-3.61001	0.000306191	0.00108882	CD44
ENSG00000026559	71.6706	0.465095	0.299757	1.55157	0.120765	0.181792	KCNG1
ENSG00000026652	723.978	0.0317523	0.14105	0.225114	0.82189	0.862417	AGPAT4
ENSG00000026950	40.3591	0.61805	0.411522	1.50186	0.133133	0.197413	BTN3A1
ENSG00000027001	192.393	-0.229623	0.216533	-1.06045	0.288939	0.377252	MIPEP
ENSG00000027075	234.069	-1.96716	0.360543	-5.45609	4.86728e-08	6.51682e-07	PRKCH
ENSG00000027644	2.54969	0.371181	1.37344	0.270256	0.786963		INSRR
ENSG00000027697	190.516	0.65281	0.202676	3.22096	0.00127762	0.00369832	IFNGR1
ENSG00000027847	156.248	0.879473	0.273528	3.21529	0.00130313	0.00376536	B4GALT7
ENSG00000027869	5.68038	-1.22531	0.95068	-1.28888	0.19744	0.274275	SH2D2A
ENSG00000028116	103.77	-0.855405	0.352545	-2.42637	0.0152506	0.0314213	VRK2
ENSG00000028137	54.7179	-1.2675	0.340646	-3.72087	0.000198539	0.000748771	TNFRSF1B
ENSG00000028203	954.588	-0.0039676	0.146638	-0.0270572	0.978414	0.984786	VEZT
ENSG00000028277	900.044	0.958734	0.19553	4.90327	9.42563e-07	7.97692e-06	POU2F2
ENSG00000028310	475.438	0.679733	0.228581	2.97371	0.00294227	0.00761945	BRD9
ENSG00000028528	807.581	0.0468846	0.150312	0.311915	0.755105	0.808762	SNX1
ENSG00000028839	406.538	0.683652	0.170616	4.00697	6.15039e-05	0.000274911	TBPL1
ENSG00000029153	62.6977	-0.79402	0.30898	-2.56981	0.0101755	0.0222171	ARNTL2
ENSG00000029363	577.035	-0.415274	0.169701	-2.44709	0.0144015	0.0299015	BCLAF1
ENSG00000029364	429.947	-0.242639	0.180715	-1.34266	0.179382	0.253262	SLC39A9
ENSG00000029534	224.53	-0.987244	0.227458	-4.34033	1.42269e-05	7.89785e-05	ANK1
ENSG00000029559	3.09769	-1.34517	1.3597	-0.989313	0.32251	0.411635	IBSP
ENSG00000029639	150.828	0.3042	0.220013	1.38264	0.166774	0.23821	TFB1M
ENSG00000029725	1062.95	0.0597508	0.141016	0.423717	0.671772	0.739743	RABEP1
ENSG00000029993	3771.32	0.284073	0.169072	1.68019	0.0929202	0.145728	HMGB3
ENSG00000030066	432.513	-0.404504	0.158898	-2.54569	0.0109063	0.0236091	NUP160
ENSG00000030110	121.5	1.02095	0.244712	4.17204	3.01888e-05	0.00015005	BAK1
ENSG00000030304	73.871	-1.50514	0.401716	-3.74677	0.000179127	0.000687593	MUSK
ENSG00000030419	105.861	-1.04867	0.252691	-4.15001	3.32468e-05	0.000162815	IKZF2
ENSG00000030582	586.38	1.69881	0.246933	6.87964	6.00036e-12	2.98662e-10	GRN
ENSG00000031003	643.541	-0.240116	0.153062	-1.56874	0.116708	0.176424	FAM13B
ENSG00000031081	103.34	-1.06096	0.278097	-3.81509	0.000136134	0.000540245	ARHGAP31
ENSG00000031691	181.326	-0.136094	0.204432	-0.665717	0.505592	0.592059	CENPQ
ENSG00000031698	1547.39	0.876798	0.135041	6.49281	8.42483e-11	2.89367e-09	SARS
ENSG00000031823	682.146	0.762624	0.16594	4.5958	4.311e-06	2.88931e-05	RANBP3
ENSG00000032219	750.253	0.0981561	0.141021	0.696041	0.486403	0.57316	ARID4A
ENSG00000032389	495.965	0.184273	0.206797	0.891081	0.372886	0.463085	EIPR1
ENSG00000032444	189.665	0.531218	0.227321	2.33686	0.0194464	0.0386689	PNPLA6
ENSG00000032742	279.003	-0.444308	0.183075	-2.42692	0.0152277	0.0313852	IFT88
ENSG00000033011	154.798	1.01414	0.22474	4.51253	6.40584e-06	4.0499e-05	ALG1
ENSG00000033030	193.1	-0.392219	0.209034	-1.87634	0.0606085	0.101427	ZCCHC8
ENSG00000033050	235.562	0.523831	0.192912	2.71539	0.00661979	0.0153697	ABCF2
ENSG00000033100	187.898	1.25076	0.240073	5.20991	1.88928e-07	2.0212e-06	CHPF2
ENSG00000033122	755.159	-0.908554	0.224657	-4.04418	5.25059e-05	0.000239988	LRRC7
ENSG00000033170	948.329	-0.405456	0.137641	-2.94575	0.00322176	0.0082427	FUT8
ENSG00000033178	307.187	-0.58015	0.212394	-2.73148	0.00630501	0.0147262	UBA6
ENSG00000033327	437.309	-0.0519594	0.163874	-0.317068	0.751192	0.806139	GAB2
ENSG00000033627	369.727	-0.101217	0.164891	-0.61384	0.539321	0.623546	ATP6V0A1
ENSG00000033800	605.589	-0.141217	0.150438	-0.938704	0.347882	0.438148	PIAS1
ENSG00000033867	574.938	-0.284899	0.197739	-1.44079	0.149645	0.217767	SLC4A7
ENSG00000034053	1062.27	0.322812	0.152155	2.1216	0.0338711	0.0618968	APBA2
ENSG00000034152	165.802	1.0699	0.220806	4.84543	1.26341e-06	1.02304e-05	MAP2K3
ENSG00000034239	20.2554	0.471746	0.516146	0.913978	0.360728	0.450975	EFCAB1
ENSG00000034510	12513.3	0.587701	0.189235	3.10567	0.00189849	0.00523353	TMSB10
ENSG00000034533	61.8768	0.85021	0.305482	2.78317	0.005383	0.0128678	ASTE1
ENSG00000034677	226.554	-0.0682243	0.189339	-0.36033	0.718601	0.778705	RNF19A
ENSG00000034693	212.67	0.869649	0.209224	4.15654	3.23102e-05	0.000158758	PEX3
ENSG00000034713	1411.74	0.574138	0.192144	2.98806	0.00280751	0.00731672	GABARAPL2
ENSG00000034971	17.5632	-1.55631	0.720728	-2.15936	0.0308225	0.0570894	MYOC
ENSG00000035115	174.783	0.318228	0.239788	1.32712	0.184468	0.259135	SH3YL1
ENSG00000035141	408.176	0.585287	0.188164	3.11051	0.00186764	0.00516039	FAM136A
ENSG00000035403	492.074	-0.720707	0.16862	-4.27415	1.91871e-05	0.000102138	VCL
ENSG00000035499	218.305	-0.401071	0.188999	-2.12208	0.0338312	0.0618367	DEPDC1B
ENSG00000035664	380.693	-1.73409	0.181585	-9.54976	1.29992e-21	4.40473e-19	DAPK2
ENSG00000035681	205.217	-0.251981	0.190115	-1.32541	0.185034	0.259909	NSMAF
ENSG00000035687	429.984	0.274115	0.185329	1.47908	0.13912	0.205043	ADSS
ENSG00000035720	43.4656	-1.93937	0.4566	-4.24741	2.16256e-05	0.000112735	STAP1
ENSG00000035862	1133.13	0.611696	0.150589	4.06201	4.86515e-05	0.000225234	TIMP2
ENSG00000035928	520.562	-0.41332	0.172915	-2.39031	0.016834	0.0341881	RFC1
ENSG00000036054	280.764	-0.41276	0.174666	-2.36313	0.0181212	0.0363662	TBC1D23
ENSG00000036257	752.995	-0.303904	0.150714	-2.01642	0.0437559	0.0771674	CUL3
ENSG00000036448	135.657	-0.150929	0.250206	-0.60322	0.546363	0.629745	MYOM2
ENSG00000036530	115.425	0.535403	0.263943	2.02848	0.0425111	0.0752357	CYP46A1
ENSG00000036549	542.633	-0.269944	0.15061	-1.79234	0.0730785	0.118753	AC118549.1
ENSG00000036565	22.2557	-0.425621	0.535971	-0.794112	0.42713	0.516685	SLC18A1
ENSG00000036672	83.2455	0.262607	0.370174	0.709414	0.478067	0.564922	USP2
ENSG00000036828	53.7505	-1.93712	0.433887	-4.46457	8.02301e-06	4.89358e-05	CASR
ENSG00000037042	154.168	1.04947	0.227898	4.60497	4.12521e-06	2.78171e-05	TUBG2
ENSG00000037241	829.438	0.718412	0.201827	3.55955	0.000371494	0.00128096	RPL26L1
ENSG00000037280	43.2781	-0.746127	0.381617	-1.95517	0.0505631	0.0871317	FLT4
ENSG00000037474	266.878	0.363602	0.179358	2.02724	0.042638	0.0754525	NSUN2
ENSG00000037637	983.431	-0.0483156	0.148489	-0.325381	0.744893	0.80073	FBXO42
ENSG00000037749	343.793	-0.141214	0.180182	-0.783731	0.433198	0.522415	MFAP3
ENSG00000037757	106.688	0.461555	0.258421	1.78606	0.0740897	0.120109	MRI1
ENSG00000037897	126.12	0.704551	0.286295	2.46093	0.0138579	0.0289308	METTL1
ENSG00000037965	11.8382	1.1932	2.55253	0.467458	0.640172	0.712658	HOXC8
ENSG00000038002	118.527	0.996438	0.271899	3.66474	0.000247593	0.000903788	AGA
ENSG00000038210	30.0194	-0.0990469	0.466523	-0.212309	0.831866	0.870294	PI4K2B
ENSG00000038219	217.485	-0.78205	0.204305	-3.82785	0.000129266	0.000517183	BOD1L1
ENSG00000038274	774.74	0.539506	0.176259	3.06088	0.0022069	0.00595151	MAT2B
ENSG00000038295	107.249	-1.80398	0.397213	-4.54158	5.58331e-06	3.60227e-05	TLL1
ENSG00000038358	64.2208	0.943483	0.341408	2.76351	0.00571837	0.0135478	EDC4
ENSG00000038382	1378.49	-0.286046	0.145902	-1.96054	0.0499329	0.0861806	TRIO
ENSG00000038427	1203.65	-0.606762	0.247921	-2.4474	0.014389	0.0298804	VCAN
ENSG00000038532	631.716	-0.218384	0.160216	-1.36305	0.172866	0.245557	CLEC16A
ENSG00000038945	188.06	-2.15412	0.363157	-5.93166	2.99886e-09	6.04717e-08	MSR1
ENSG00000039068	214.84	-1.39691	0.256346	-5.4493	5.05692e-08	6.76559e-07	CDH1
ENSG00000039123	317.814	-0.574253	0.18555	-3.09487	0.00196898	0.0053897	MTREX
ENSG00000039139	98.8226	-1.67854	0.273069	-6.14696	7.89828e-10	1.9546e-08	DNAH5
ENSG00000039319	247.561	-0.43158	0.203439	-2.12142	0.0338864	0.0619182	ZFYVE16
ENSG00000039523	409.222	0.680845	0.195695	3.47911	0.000503081	0.00165879	RIPOR1
ENSG00000039537	79.8415	-1.98317	0.402952	-4.92161	8.58338e-07	7.36315e-06	C6
ENSG00000039560	529.03	-0.743478	0.158904	-4.67877	2.88594e-06	2.0637e-05	RAI14
ENSG00000039600	35.8361	-1.62131	0.459353	-3.52956	0.000416257	0.00141156	SOX30
ENSG00000039650	256.11	1.36467	0.236739	5.76444	8.19271e-09	1.42503e-07	PNKP
ENSG00000039987	10.3105	-1.34936	0.746548	-1.80746	0.0706902	0.115458	BEST2
ENSG00000040199	263.97	-0.715047	0.191409	-3.7357	0.00018719	0.000713608	PHLPP2
ENSG00000040275	299.096	0.269326	0.209186	1.28749	0.197923	0.27488	SPDL1
ENSG00000040341	1016.49	0.0173054	0.13846	0.124985	0.900536	0.923922	STAU2
ENSG00000040487	260.273	1.15325	0.197238	5.847	5.00518e-09	9.21538e-08	PQLC2
ENSG00000040531	168.704	0.674515	0.203868	3.30859	0.000937663	0.00283673	CTNS
ENSG00000040608	115.336	0.514578	0.265305	1.93957	0.0524324	0.0898346	RTN4R
ENSG00000040633	456.406	1.02481	0.217826	4.70471	2.54223e-06	1.86177e-05	PHF23
ENSG00000040731	143.767	-0.119888	0.25172	-0.476276	0.633878	0.707317	CDH10
ENSG00000040933	505.991	0.00186704	0.154679	0.0120704	0.990369	0.993414	INPP4A
ENSG00000041353	156.854	-0.912336	0.220924	-4.12964	3.63331e-05	0.000175635	RAB27B
ENSG00000041357	2858.55	0.806052	0.164742	4.89282	9.93998e-07	8.35172e-06	PSMA4
ENSG00000041515	320.965	-1.08154	0.213746	-5.05994	4.19379e-07	3.96217e-06	MYO16
ENSG00000041802	295.077	0.458979	0.19313	2.37652	0.0174767	0.0352738	LSG1
ENSG00000041880	18.3798	1.4344	0.581591	2.46635	0.0136499	0.0285643	PARP3
ENSG00000041982	54.5775	0.066758	0.339872	0.196421	0.84428	0.879833	TNC
ENSG00000041988	394.718	0.718916	0.196666	3.65552	0.000256662	0.000932948	THAP3
ENSG00000042062	230.064	-0.920362	0.227985	-4.03695	5.41512e-05	0.00024674	RIPOR3
ENSG00000042088	298.596	0.253183	0.17563	1.44157	0.149425	0.217574	TDP1
ENSG00000042286	39.5276	-0.0834305	0.374547	-0.22275	0.82373	0.864039	AIFM2
ENSG00000042304	25.9937	-1.47854	0.500753	-2.95264	0.00315071	0.00808556	C2orf83
ENSG00000042317	349.962	0.0596537	0.168844	0.353306	0.723859	0.783247	SPATA7
ENSG00000042429	258.336	0.371836	0.19227	1.93393	0.0531213	0.0908648	MED17
ENSG00000042445	99.9657	1.01259	0.276323	3.66451	0.000247816	0.000904376	RETSAT
ENSG00000042493	193.325	0.196119	0.218423	0.897887	0.369246	0.459276	CAPG
ENSG00000042753	1784.19	0.648719	0.158101	4.10319	4.0749e-05	0.000193687	AP2S1
ENSG00000042781	283.289	-1.93266	0.29079	-6.64625	3.00662e-11	1.19317e-09	USH2A
ENSG00000042813	52.4785	-2.494	0.479696	-5.19913	2.00222e-07	2.12014e-06	ZPBP
ENSG00000042832	68.4974	-2.39776	0.402631	-5.95523	2.59704e-09	5.33331e-08	TG
ENSG00000042980	7.76548	-0.821972	0.927184	-0.886525	0.375334	0.465666	ADAM28
ENSG00000043039	57.157	-2.83418	0.465932	-6.08282	1.18085e-09	2.71627e-08	BARX2
ENSG00000043093	409.408	0.17767	0.172294	1.0312	0.302445	0.391499	DCUN1D1
ENSG00000043143	78.249	-0.963854	0.337093	-2.85931	0.00424564	0.0104554	JADE2
ENSG00000043355	364.552	0.484038	0.263901	1.83417	0.0666293	0.109998	ZIC2
ENSG00000043462	19.0133	-1.71485	0.637563	-2.6897	0.00715166	0.0164314	LCP2
ENSG00000043514	449.673	0.00416376	0.1796	0.0231835	0.981504	0.986818	TRIT1
ENSG00000043591	5.54799	-1.71026	1.01897	-1.67843	0.0932636	0.146129	ADRB1
ENSG00000044090	130.541	0.356118	0.224627	1.58537	0.112882	0.171567	CUL7
ENSG00000044115	1020.16	-0.385554	0.142585	-2.70403	0.0068504	0.0158307	CTNNA1
ENSG00000044446	164.128	-0.370454	0.209847	-1.76535	0.077505	0.12483	PHKA2
ENSG00000044459	414.033	-0.879003	0.153902	-5.71144	1.12024e-08	1.8763e-07	CNTLN
ENSG00000044524	1230.73	-0.360596	0.149349	-2.41445	0.015759	0.032344	EPHA3
ENSG00000044574	1288.32	0.82173	0.176914	4.64479	3.40428e-06	2.36435e-05	HSPA5
ENSG00000046604	111.681	-0.81035	0.757582	-1.06965	0.284776	0.372873	DSG2
ENSG00000046647	296.103	0.728947	0.182079	4.00345	6.24243e-05	0.00027846	GEMIN8
ENSG00000046651	288.416	0.0691968	0.174622	0.396267	0.691908	0.756863	OFD1
ENSG00000046653	4601.05	1.29312	0.138034	9.36817	7.37987e-21	2.16722e-18	GPM6B
ENSG00000046889	240.533	-0.162511	0.232762	-0.698186	0.485061	0.571844	PREX2
ENSG00000047056	436.469	-0.178386	0.173685	-1.02706	0.30439	0.393583	WDR37
ENSG00000047188	188.246	-0.536222	0.207178	-2.58822	0.00964739	0.021259	YTHDC2
ENSG00000047230	576.933	-0.576127	0.148575	-3.87768	0.000105456	0.000434752	CTPS2
ENSG00000047249	854.656	0.603215	0.15624	3.86082	0.000113008	0.000461888	ATP6V1H
ENSG00000047315	410.215	-0.177454	0.1667	-1.06451	0.287097	0.375331	POLR2B
ENSG00000047346	446.12	0.130252	0.182985	0.711817	0.476578	0.563389	FAM214A
ENSG00000047365	138.718	-1.78504	0.277704	-6.42785	1.29425e-10	4.19205e-09	ARAP2
ENSG00000047410	363.601	-0.424376	0.168844	-2.51342	0.0119567	0.0255058	TPR
ENSG00000047457	40.0217	-2.05361	0.413335	-4.96839	6.75116e-07	6.01697e-06	CP
ENSG00000047578	453.835	-0.856412	0.168092	-5.09491	3.4891e-07	3.39844e-06	KIAA0556
ENSG00000047579	511.546	0.953256	0.155222	6.14125	8.1875e-10	2.01486e-08	DTNBP1
ENSG00000047597	14.8768	1.18602	0.63169	1.87753	0.0604453	0.101211	XK
ENSG00000047617	171.633	-1.57911	0.297916	-5.30053	1.15464e-07	1.34467e-06	ANO2
ENSG00000047621	163.71	-0.00953579	0.21514	-0.0443236	0.964646	0.973877	C12orf4
ENSG00000047634	129.287	0.354662	0.224235	1.58165	0.113729	0.172674	SCML1
ENSG00000047644	295.192	-0.484057	0.168132	-2.87903	0.00398894	0.00992411	WWC3
ENSG00000047648	165.187	-1.31932	0.302882	-4.3559	1.32521e-05	7.44111e-05	ARHGAP6
ENSG00000047662	275.937	-0.833149	0.213488	-3.90255	9.51841e-05	0.000398371	FAM184B
ENSG00000047849	1660.45	0.166883	0.119725	1.39389	0.163352	0.234148	MAP4
ENSG00000047932	586.388	0.310368	0.166664	1.86225	0.0625686	0.104153	GOPC
ENSG00000047936	14.5971	-3.01885	0.815883	-3.7001	0.000215511	0.000802981	ROS1
ENSG00000048028	221.808	-0.507897	0.227912	-2.22847	0.025849	0.0492282	USP28
ENSG00000048052	835.963	-0.765199	0.148638	-5.14806	2.63191e-07	2.65907e-06	HDAC9
ENSG00000048140	218.229	1.64549	0.212428	7.74609	9.47684e-15	9.43401e-13	TSPAN17
ENSG00000048162	354.73	0.451338	0.207594	2.17414	0.0296948	0.0553017	NOP16
ENSG00000048342	287.181	-0.155667	0.179536	-0.867057	0.385911	0.47604	CC2D2A
ENSG00000048392	159.495	0.618146	0.240863	2.56638	0.0102765	0.0224155	RRM2B
ENSG00000048405	139.16	-0.244947	0.239611	-1.02227	0.306654	0.3959	ZNF800
ENSG00000048471	877.342	-1.02551	0.17493	-5.86239	4.56245e-09	8.5704e-08	SNX29
ENSG00000048540	369.11	1.40072	0.252233	5.55325	2.80408e-08	4.10365e-07	LMO3
ENSG00000048544	568.584	0.761208	0.176536	4.3119	1.61854e-05	8.81325e-05	MRPS10
ENSG00000048545	109.021	1.07205	0.285469	3.7554	0.000173066	0.000666686	GUCA1A
ENSG00000048649	1189.23	-0.202228	0.136235	-1.4844	0.137702	0.203259	RSF1
ENSG00000048707	526.701	-0.874066	0.167208	-5.22742	1.71891e-07	1.87305e-06	VPS13D
ENSG00000048740	1819.2	0.0744341	0.12425	0.599066	0.549129	0.632437	CELF2
ENSG00000048828	209.555	-0.124687	0.189473	-0.658072	0.510492	0.596516	FAM120A
ENSG00000048991	758.495	-0.285466	0.157315	-1.81462	0.0695831	0.113956	R3HDM1
ENSG00000049089	70.5133	0.35234	0.438822	0.802922	0.42202	0.511544	COL9A2
ENSG00000049130	82.5941	-0.635747	0.290679	-2.18711	0.0287343	0.0538014	KITLG
ENSG00000049167	196.048	-0.0629771	0.214309	-0.293861	0.768864	0.819861	ERCC8
ENSG00000049192	327.333	-1.27778	0.22815	-5.60061	2.13601e-08	3.2614e-07	ADAMTS6
ENSG00000049239	166.925	0.00748453	0.206244	0.0362898	0.971051	0.978717	H6PD
ENSG00000049245	131.985	0.238886	0.257243	0.928638	0.353077	0.443215	VAMP3
ENSG00000049246	79.9716	-0.472941	0.348211	-1.3582	0.174399	0.247476	PER3
ENSG00000049247	21.1852	-0.854896	0.565453	-1.51188	0.130565	0.1943	UTS2
ENSG00000049249	35.3833	-1.67181	0.464268	-3.60096	0.000317046	0.00111996	TNFRSF9
ENSG00000049283	3.9329	-0.0151352	1.15721	-0.013079	0.989565	0.992889	EPN3
ENSG00000049323	619.869	-0.205075	0.203313	-1.00867	0.313134	0.402644	LTBP1
ENSG00000049449	1302.86	0.722662	0.147561	4.89737	9.71278e-07	8.18848e-06	RCN1
ENSG00000049540	84.9473	-0.325588	0.350345	-0.929334	0.352716	0.442874	ELN
ENSG00000049541	793.063	0.469199	0.148047	3.16927	0.00152824	0.0043292	RFC2
ENSG00000049618	1342.94	-0.382594	0.158138	-2.41936	0.0155477	0.0319588	ARID1B
ENSG00000049656	240.914	0.488678	0.216202	2.26028	0.0238037	0.0459792	CLPTM1L
ENSG00000049759	1977.1	-0.412043	0.17514	-2.35265	0.0186401	0.0372844	NEDD4L
ENSG00000049768	12.2298	-0.537331	0.659347	-0.814945	0.415104	0.504736	FOXP3
ENSG00000049769	176.906	0.374613	0.224829	1.66621	0.0956708	0.149271	PPP1R3F
ENSG00000049860	437.65	0.824306	0.21159	3.89577	9.78879e-05	0.000407927	HEXB
ENSG00000049883	128.619	-0.231047	0.23275	-0.992684	0.320864	0.40992	PTCD2
ENSG00000050030	125.662	-0.519135	0.248504	-2.08904	0.0367043	0.0662702	NEXMIF
ENSG00000050130	418.346	1.19955	0.224104	5.35264	8.66822e-08	1.05918e-06	JKAMP
ENSG00000050165	795.952	1.63237	0.215189	7.58573	3.30628e-14	3.01848e-12	DKK3
ENSG00000050327	11.9696	-1.19736	0.745867	-1.60532	0.108423	0.165848	ARHGEF5
ENSG00000050344	56.0683	-0.79763	0.377351	-2.11376	0.0345358	0.0629483	NFE2L3
ENSG00000050393	253.17	0.586728	0.177552	3.30455	0.000951301	0.00287167	MCUR1
ENSG00000050405	450.946	-1.00919	0.171932	-5.8697	4.36584e-09	8.29838e-08	LIMA1
ENSG00000050426	321.231	0.707958	0.176887	4.00233	6.27225e-05	0.000279436	LETMD1
ENSG00000050438	550.963	0.270398	0.144162	1.87566	0.0607024	0.101509	SLC4A8
ENSG00000050555	127.146	-1.75382	0.342011	-5.12798	2.92871e-07	2.91712e-06	LAMC3
ENSG00000050628	79.9109	-1.48208	0.382709	-3.87259	0.000107686	0.000442497	PTGER3
ENSG00000050730	41.5082	-2.05088	0.422733	-4.85147	1.22549e-06	9.96452e-06	TNIP3
ENSG00000050748	233.825	-0.0769034	0.183915	-0.418145	0.675841	0.743081	MAPK9
ENSG00000050767	269.312	-1.41976	0.314148	-4.51942	6.201e-06	3.93594e-05	COL23A1
ENSG00000050820	335.93	0.451399	0.193748	2.32983	0.019815	0.0393177	BCAR1
ENSG00000051009	121.153	1.02255	0.297215	3.44042	0.000580813	0.00187813	FAM160A2
ENSG00000051108	781.821	1.76879	0.164705	10.7392	6.66211e-27	4.69545e-24	HERPUD1
ENSG00000051128	405.091	0.938733	0.240357	3.90557	9.40032e-05	0.000394554	HOMER3
ENSG00000051180	29.5033	0.487296	0.426451	1.14268	0.253173	0.337769	RAD51
ENSG00000051341	205.825	-0.927419	0.210279	-4.41042	1.03169e-05	6.03808e-05	POLQ
ENSG00000051382	505.415	-0.756617	0.186509	-4.05673	4.97654e-05	0.000229366	PIK3CB
ENSG00000051523	100.196	0.344129	0.475829	0.723219	0.469545	0.55678	CYBA
ENSG00000051596	897.037	0.706307	0.170191	4.1501	3.32336e-05	0.000162795	THOC3
ENSG00000051620	196.075	0.50334	0.23854	2.11008	0.0348512	0.0634379	HEBP2
ENSG00000051825	357.235	-0.744528	0.175507	-4.24215	2.21391e-05	0.000114969	MPHOSPH9
ENSG00000052126	1061.61	-0.556352	0.150477	-3.69726	0.000217935	0.000810644	PLEKHA5
ENSG00000052344	41.6032	0.292882	0.577069	0.507534	0.611781	0.688263	PRSS8
ENSG00000052723	365.018	0.446907	0.199862	2.23608	0.0253467	0.0484235	SIKE1
ENSG00000052749	182.185	-0.424759	0.215302	-1.97286	0.0485121	0.0841404	RRP12
ENSG00000052795	878.514	0.321967	0.154533	2.08348	0.0372078	0.066996	FNIP2
ENSG00000052802	1552.32	1.16931	0.149408	7.82628	5.02532e-15	5.30216e-13	MSMO1
ENSG00000052841	866.24	0.117355	0.149581	0.784555	0.432714	0.521971	TTC17
ENSG00000052850	48.6389	-0.972945	0.369571	-2.63263	0.00847256	0.0190538	ALX4
ENSG00000053108	94.3768	-1.76113	0.282888	-6.22552	4.79971e-10	1.27558e-08	FSTL4
ENSG00000053254	962.789	-0.11514	0.164607	-0.699483	0.484251	0.571011	FOXN3
ENSG00000053328	82.9192	-1.33924	0.293764	-4.5589	5.14212e-06	3.35199e-05	METTL24
ENSG00000053371	1014.35	0.776047	0.197326	3.93283	8.39532e-05	0.000358521	AKR7A2
ENSG00000053372	586.612	0.702225	0.164312	4.27374	1.92224e-05	0.00010226	MRTO4
ENSG00000053438	7.8535	1.1902	1.19258	0.998005	0.318277	0.407354	NNAT
ENSG00000053501	383.222	0.560696	0.232266	2.41403	0.0157772	0.0323701	USE1
ENSG00000053524	263.327	-1.12464	0.233437	-4.81773	1.45202e-06	1.14936e-05	MCF2L2
ENSG00000053702	9.56941	0.22615	0.714631	0.316457	0.751656	0.806383	NRIP2
ENSG00000053747	173.999	-1.74065	0.333835	-5.21409	1.84727e-07	1.99197e-06	LAMA3
ENSG00000053770	342.677	0.534527	0.193097	2.76817	0.00563716	0.0133808	AP5M1
ENSG00000053900	161.132	0.264366	0.203454	1.29939	0.19381	0.269742	ANAPC4
ENSG00000053918	92.7912	-1.18188	0.316255	-3.73711	0.00018615	0.000710258	KCNQ1
ENSG00000054116	1262.77	0.767928	0.177941	4.31563	1.59146e-05	8.69388e-05	TRAPPC3
ENSG00000054118	967.64	-0.237729	0.15372	-1.54651	0.121982	0.183405	THRAP3
ENSG00000054148	2367.76	0.772587	0.166344	4.64452	3.4087e-06	2.36555e-05	PHPT1
ENSG00000054267	1575.77	-0.316823	0.164383	-1.92734	0.0539369	0.0920632	ARID4B
ENSG00000054277	61.4813	-0.507118	0.307399	-1.64971	0.0990027	0.153667	OPN3
ENSG00000054282	607.244	-0.0111272	0.145084	-0.0766954	0.938866	0.954963	SDCCAG8
ENSG00000054356	347.248	2.26065	0.222056	10.1806	2.4215e-24	1.09402e-21	PTPRN
ENSG00000054392	318.177	-1.33236	0.226137	-5.89183	3.81947e-09	7.4415e-08	HHAT
ENSG00000054523	1499.45	-0.289664	0.130848	-2.21375	0.0268457	0.0508079	KIF1B
ENSG00000054598	14.9926	-0.762985	0.773435	-0.986489	0.323893	0.413162	FOXC1
ENSG00000054611	440.926	-0.492955	0.179947	-2.73944	0.00615431	0.0144278	TBC1D22A
ENSG00000054654	1064.37	-1.06566	0.13664	-7.79903	6.23838e-15	6.35378e-13	SYNE2
ENSG00000054690	124.981	-0.208247	0.298943	-0.696611	0.486046	0.572813	PLEKHH1
ENSG00000054793	1836.77	0.22397	0.14248	1.57194	0.115965	0.175524	ATP9A
ENSG00000054938	25.5955	-1.62798	0.640167	-2.54306	0.0109886	0.0237599	CHRDL2
ENSG00000054965	1045.29	-0.538364	0.162863	-3.30563	0.000947616	0.00286251	FAM168A
ENSG00000054967	77.8434	0.812581	0.292654	2.77659	0.0054932	0.0130904	RELT
ENSG00000054983	171.278	-0.00956277	0.228514	-0.0418476	0.96662	0.975199	GALC
ENSG00000055044	837.038	-0.058893	0.141384	-0.416546	0.67701	0.743837	NOP58
ENSG00000055070	510.956	0.22528	0.167554	1.34452	0.17878	0.252554	SZRD1
ENSG00000055118	199.373	0.867891	0.283345	3.06302	0.00219115	0.00591424	KCNH2
ENSG00000055130	734.738	-0.0428055	0.154659	-0.276773	0.781954	0.830402	CUL1
ENSG00000055147	209.72	0.567518	0.200862	2.82542	0.0047219	0.0114806	FAM114A2
ENSG00000055163	683.908	0.43711	0.170847	2.55848	0.010513	0.0228747	CYFIP2
ENSG00000055208	465.147	-0.342358	0.161536	-2.11939	0.0340572	0.0622111	TAB2
ENSG00000055211	186.662	0.387565	0.212913	1.8203	0.0687135	0.112815	GINM1
ENSG00000055332	434.752	-0.0298361	0.168875	-0.176675	0.859763	0.891801	EIF2AK2
ENSG00000055483	299.919	-0.00420219	0.177961	-0.023613	0.981161	0.98667	USP36
ENSG00000055609	1714.54	-0.677362	0.149189	-4.5403	5.61743e-06	3.62163e-05	KMT2C
ENSG00000055732	13.9208	-0.438665	0.770413	-0.569389	0.569092	0.650539	MCOLN3
ENSG00000055813	15.4722	1.32596	0.653248	2.02979	0.0423774	0.07503	CCDC85A
ENSG00000055917	1035.05	-0.193583	0.148337	-1.30502	0.191886	0.26755	PUM2
ENSG00000055950	1322.23	0.648328	0.200629	3.23148	0.00123152	0.00358136	MRPL43
ENSG00000055955	9.71879	0.170272	0.724925	0.234882	0.8143	0.856518	ITIH4
ENSG00000055957	4.54343	-1.29283	1.0615	-1.21793	0.223251	0.304018	ITIH1
ENSG00000056050	1466.93	0.55059	0.15299	3.59886	0.00031962	0.00112792	HPF1
ENSG00000056097	770.829	-0.3542	0.143376	-2.47043	0.0134951	0.0282844	ZFR
ENSG00000056277	274.989	-0.409943	0.176899	-2.31738	0.0204832	0.040502	ZNF280C
ENSG00000056291	32.7316	-1.87651	0.488037	-3.84501	0.000120546	0.000487383	NPFFR2
ENSG00000056487	859.624	-0.0796964	0.201801	-0.394925	0.692898	0.757421	PHF21B
ENSG00000056558	15.8832	-0.87618	0.595218	-1.47203	0.141012	0.20726	TRAF1
ENSG00000056586	453.211	-0.353671	0.160313	-2.20614	0.0273744	0.0516421	RC3H2
ENSG00000056736	60.7682	-0.0328506	0.349143	-0.0940893	0.925038	0.943512	IL17RB
ENSG00000056972	157.644	0.043555	0.23372	0.186355	0.852166	0.885694	TRAF3IP2
ENSG00000056998	274.744	0.234363	0.213806	1.09615	0.273015	0.359692	GYG2
ENSG00000057019	790.016	-0.0119393	0.188931	-0.063194	0.949612	0.962614	DCBLD2
ENSG00000057252	341.943	-0.132896	0.171128	-0.776587	0.437403	0.526581	SOAT1
ENSG00000057294	841.342	-1.7233	0.206926	-8.32808	8.21652e-17	1.19649e-14	PKP2
ENSG00000057468	83.5133	-1.76209	0.343378	-5.13162	2.87258e-07	2.87095e-06	MSH4
ENSG00000057593	4.39766	0.509138	1.3593	0.37456	0.707987	0.770236	F7
ENSG00000057608	1870.64	0.468162	0.153806	3.04386	0.00233568	0.00625165	GDI2
ENSG00000057657	8.45598	-1.66091	0.878648	-1.8903	0.0587178	0.0988353	PRDM1
ENSG00000057663	444.103	-0.366849	0.180686	-2.03031	0.0423249	0.0749512	ATG5
ENSG00000057704	212.24	0.0172713	0.213181	0.0810169	0.935429	0.952197	TMCC3
ENSG00000057757	879.954	0.795999	0.167301	4.7579	1.95616e-06	1.48503e-05	PITHD1
ENSG00000057935	874.888	-0.538353	0.167463	-3.21476	0.00130554	0.00377169	MTA3
ENSG00000058056	427.843	-0.236961	0.161079	-1.47108	0.141268	0.207567	USP13
ENSG00000058063	234.096	-0.908815	0.195927	-4.63853	3.50896e-06	2.42748e-05	ATP11B
ENSG00000058085	67.1877	-1.59892	0.360997	-4.42918	9.45903e-06	5.61172e-05	LAMC2
ENSG00000058091	717.713	-0.83848	0.135867	-6.17135	6.77107e-10	1.72657e-08	CDK14
ENSG00000058262	819.121	0.966592	0.147429	6.55632	5.51533e-11	2.00785e-09	SEC61A1
ENSG00000058272	639.302	-0.351977	0.178497	-1.97189	0.0486216	0.0843055	PPP1R12A
ENSG00000058335	263.521	0.204694	0.186075	1.10007	0.271303	0.357865	RASGRF1
ENSG00000058404	372.284	1.0709	0.233912	4.57823	4.68916e-06	3.09565e-05	CAMK2B
ENSG00000058453	329.135	-0.479366	0.197286	-2.4298	0.015107	0.0311693	CROCC
ENSG00000058600	217.493	0.282971	0.206561	1.36991	0.170714	0.243049	POLR3E
ENSG00000058668	749.351	-0.0895619	0.144	-0.621956	0.533971	0.618415	ATP2B4
ENSG00000058673	34.8251	-0.39825	0.46978	-0.847738	0.396584	0.486627	ZC3H11A
ENSG00000058729	171.065	0.570415	0.278259	2.04994	0.04037	0.0720104	RIOK2
ENSG00000058799	340.95	0.766497	0.175162	4.37592	1.20919e-05	6.87953e-05	YIPF1
ENSG00000058804	257.142	-0.466377	0.215431	-2.16485	0.0303992	0.0564359	NDC1
ENSG00000058866	241.563	-1.72422	0.292228	-5.90027	3.62908e-09	7.12075e-08	DGKG
ENSG00000059122	333.589	0.737196	0.227256	3.2439	0.00117907	0.00345676	FLYWCH1
ENSG00000059145	493.031	-1.11434	0.179412	-6.21104	5.2636e-10	1.37399e-08	UNKL
ENSG00000059377	220.763	-1.48743	0.28609	-5.19916	2.00187e-07	2.12014e-06	TBXAS1
ENSG00000059378	16.0939	-1.69398	0.63223	-2.67937	0.00737612	0.0168832	PARP12
ENSG00000059573	331.261	0.0795833	0.172831	0.460468	0.64518	0.716486	ALDH18A1
ENSG00000059588	179.331	-0.324605	0.216013	-1.50271	0.132913	0.197182	TARBP1
ENSG00000059691	365.627	0.622091	0.18364	3.38757	0.000705157	0.00222548	GATB
ENSG00000059728	769.628	0.54562	0.176048	3.09927	0.00193995	0.00532845	MXD1
ENSG00000059758	657.575	-0.280664	0.147439	-1.9036	0.0569629	0.096397	CDK17
ENSG00000059769	46.7129	0.54256	0.416583	1.30241	0.192777	0.268559	DNAJC25
ENSG00000059804	434.882	0.760637	0.691134	1.10056	0.271086	0.357659	SLC2A3
ENSG00000059915	654.983	1.20996	0.221343	5.46644	4.59156e-08	6.20425e-07	PSD
ENSG00000060069	153.209	0.632831	0.24508	2.58214	0.00981905	0.0215564	CTDP1
ENSG00000060138	148.695	0.87419	0.303955	2.87605	0.00402691	0.00999777	YBX3
ENSG00000060140	76.1156	-1.22374	0.284036	-4.3084	1.64437e-05	8.93699e-05	STYK1
ENSG00000060237	1023.49	-0.191543	0.139205	-1.37598	0.168829	0.240696	WNK1
ENSG00000060339	660.158	-0.310014	0.151407	-2.04755	0.0406042	0.0723522	CCAR1
ENSG00000060491	298.848	1.10512	0.263071	4.20083	2.65938e-05	0.000134562	OGFR
ENSG00000060558	30.6667	-1.57654	0.523367	-3.01229	0.00259281	0.006834	GNA15
ENSG00000060566	69.2156	-1.79221	0.426615	-4.201	2.6574e-05	0.000134562	CREB3L3
ENSG00000060642	80.8799	0.198132	0.267745	0.740003	0.459298	0.547886	PIGV
ENSG00000060656	238.987	-0.0340278	0.252768	-0.134621	0.892912	0.918292	PTPRU
ENSG00000060688	1059.9	0.802187	0.164129	4.88754	1.02103e-06	8.53047e-06	SNRNP40
ENSG00000060709	172.209	-0.449059	0.219255	-2.04811	0.0405488	0.0722782	RIMBP2
ENSG00000060718	343.008	-0.165431	0.172484	-0.95911	0.337503	0.427275	COL11A1
ENSG00000060749	415.373	-0.471981	0.160723	-2.93661	0.00331825	0.00844907	QSER1
ENSG00000060762	687.596	0.971591	0.232106	4.18598	2.83932e-05	0.000142078	MPC1
ENSG00000060971	463.389	1.05736	0.195797	5.40028	6.65354e-08	8.50148e-07	ACAA1
ENSG00000060982	1095.14	0.369449	0.161528	2.28721	0.0221835	0.0433677	BCAT1
ENSG00000061273	301.138	0.308247	0.218842	1.40854	0.158972	0.228876	HDAC7
ENSG00000061337	494.689	-0.0137657	0.190314	-0.0723315	0.942338	0.957555	LZTS1
ENSG00000061455	50.3182	-1.52049	0.487047	-3.12185	0.0017972	0.0049853	PRDM6
ENSG00000061492	25.5355	-1.25821	0.536066	-2.34712	0.0189193	0.0377572	WNT8A
ENSG00000061656	17.9421	1.11673	0.548361	2.03649	0.0417009	0.0739949	SPAG4
ENSG00000061676	929.744	0.180935	0.157664	1.1476	0.251134	0.335428	NCKAP1
ENSG00000061794	723.051	0.641161	0.165478	3.87459	0.000106805	0.000439593	MRPS35
ENSG00000061918	166.352	0.501867	0.22403	2.24018	0.0250791	0.0480059	GUCY1B1
ENSG00000061936	476.453	0.0759893	0.164839	0.460992	0.644804	0.716224	SFSWAP
ENSG00000061938	186.567	0.304505	0.20886	1.45794	0.144858	0.211937	TNK2
ENSG00000061987	289.494	-0.76214	0.172729	-4.41234	1.02258e-05	5.99995e-05	MON2
ENSG00000062038	259.004	-1.22598	0.246511	-4.97332	6.5815e-07	5.87467e-06	CDH3
ENSG00000062096	60.0617	-1.80933	0.399597	-4.52789	5.95766e-06	3.79927e-05	ARSF
ENSG00000062194	1013.56	-0.191734	0.147489	-1.29999	0.193606	0.269506	GPBP1
ENSG00000062282	57.199	0.565164	0.363871	1.5532	0.120376	0.181314	DGAT2
ENSG00000062370	54.9991	0.100646	0.327769	0.307063	0.758795	0.811728	ZNF112
ENSG00000062485	573.32	0.538471	0.170149	3.16471	0.00155239	0.00438633	CS
ENSG00000062524	6.65011	-1.16367	0.956095	-1.21711	0.223563	0.304372	LTK
ENSG00000062582	1052.49	0.844583	0.199549	4.23246	2.31145e-05	0.000119226	MRPS24
ENSG00000062598	209.037	0.547655	0.195483	2.80155	0.00508581	0.0122555	ELMO2
ENSG00000062650	594.668	-0.331892	0.1487	-2.23195	0.0256179	0.0488515	WAPL
ENSG00000062716	994.835	-0.0841068	0.14387	-0.584602	0.558815	0.640993	VMP1
ENSG00000062725	615.141	-0.0516064	0.142623	-0.361838	0.717473	0.777913	APPBP2
ENSG00000062822	298.413	-0.14915	0.191788	-0.777678	0.436759	0.525878	POLD1
ENSG00000063015	204.212	0.0151497	0.257777	0.0587704	0.953135	0.965297	SEZ6
ENSG00000063046	643.426	0.0960341	0.164644	0.583283	0.559703	0.641637	EIF4B
ENSG00000063127	204.692	-0.185533	0.201524	-0.920649	0.357234	0.447367	SLC6A16
ENSG00000063169	127.885	0.187074	0.234551	0.797585	0.425111	0.514454	BICRA
ENSG00000063176	290.335	1.29259	0.248319	5.20534	1.93643e-07	2.06287e-06	SPHK2
ENSG00000063177	5040.34	0.385885	0.157752	2.44615	0.0144391	0.0299666	RPL18
ENSG00000063180	362.933	1.36834	0.223665	6.11781	9.48687e-10	2.25281e-08	CA11
ENSG00000063241	404.223	0.96287	0.171968	5.59913	2.15428e-08	3.2836e-07	ISOC2
ENSG00000063244	893.441	0.827262	0.157649	5.24749	1.54182e-07	1.70325e-06	U2AF2
ENSG00000063245	471.091	0.883297	0.213429	4.1386	3.49431e-05	0.000169895	EPN1
ENSG00000063322	468.132	0.536144	0.186804	2.87009	0.00410353	0.0101579	MED29
ENSG00000063438	37.6524	-0.552008	0.479949	-1.15014	0.250087	0.33436	AHRR
ENSG00000063587	169.294	0.466066	0.22513	2.07021	0.0384328	0.0689599	ZNF275
ENSG00000063601	273.393	0.18024	0.198675	0.907208	0.364297	0.454448	MTMR1
ENSG00000063660	1053.85	0.228632	0.188641	1.212	0.225514	0.306507	GPC1
ENSG00000063761	317.87	-0.263744	0.18508	-1.42503	0.15415	0.223117	ADCK1
ENSG00000063854	1033.14	1.04991	0.198794	5.28139	1.28209e-07	1.46691e-06	HAGH
ENSG00000063978	600.082	-0.044311	0.141669	-0.312779	0.754449	0.808307	RNF4
ENSG00000064012	64.6666	-1.39181	0.364649	-3.81685	0.000135165	0.000537001	CASP8
ENSG00000064042	820.041	-0.209924	0.13348	-1.5727	0.115787	0.175348	LIMCH1
ENSG00000064102	137.467	0.522853	0.233573	2.2385	0.0251882	0.0481884	INTS13
ENSG00000064115	282.598	0.323909	0.219058	1.47864	0.139236	0.205145	TM7SF3
ENSG00000064195	4.1527	-0.536772	1.17772	-0.455773	0.648553	0.71948	DLX3
ENSG00000064199	217.044	0.93971	0.235381	3.9923	6.54355e-05	0.000289111	SPA17
ENSG00000064201	14.1269	-0.57515	0.650446	-0.884239	0.376567	0.466998	TSPAN32
ENSG00000064205	8.67891	-0.572711	0.817107	-0.700901	0.483365	0.570263	WISP2
ENSG00000064218	46.4274	-0.484141	0.516892	-0.93664	0.348944	0.439171	DMRT3
ENSG00000064225	225.666	0.0763118	0.206433	0.369669	0.711629	0.773195	ST3GAL6
ENSG00000064270	147.27	-0.931018	0.271173	-3.4333	0.000596277	0.00192055	ATP2C2
ENSG00000064300	42.4275	0.627077	0.438289	1.43074	0.152505	0.221036	NGFR
ENSG00000064309	272.617	-1.11265	0.187758	-5.92599	3.10419e-09	6.22251e-08	CDON
ENSG00000064313	323.977	-0.449921	0.172898	-2.60224	0.00926174	0.0205333	TAF2
ENSG00000064393	1665.14	0.0173231	0.148133	0.116943	0.906905	0.92935	HIPK2
ENSG00000064419	687.287	-0.0757981	0.152132	-0.498239	0.618315	0.694019	TNPO3
ENSG00000064489	43.3137	-0.246662	0.393487	-0.626861	0.53075	0.615292	BORCS8-MEF2B
ENSG00000064490	648.119	0.808739	0.150837	5.36168	8.24521e-08	1.01311e-06	RFXANK
ENSG00000064545	195.498	0.618414	0.202204	3.05837	0.00222542	0.0059957	TMEM161A
ENSG00000064547	246.157	0.4761	0.224379	2.12186	0.0338495	0.0618637	LPAR2
ENSG00000064601	559.047	1.92266	0.200277	9.60002	7.99253e-22	2.87405e-19	CTSA
ENSG00000064607	669.496	0.300697	0.159047	1.89061	0.0586764	0.098775	SUGP2
ENSG00000064651	217.439	-0.46199	0.220465	-2.09552	0.0361246	0.0653707	SLC12A2
ENSG00000064652	290.214	-0.395209	0.181468	-2.17784	0.0294178	0.0548569	SNX24
ENSG00000064655	432.932	-0.213297	0.220658	-0.966641	0.333724	0.423311	EYA2
ENSG00000064666	670.894	0.591201	0.153718	3.846	0.00012006	0.000485866	CNN2
ENSG00000064687	146.483	0.515638	0.254035	2.02979	0.0423779	0.07503	ABCA7
ENSG00000064692	454.217	0.0182143	0.185001	0.0984555	0.921571	0.940956	SNCAIP
ENSG00000064703	142.124	-0.221381	0.222863	-0.99335	0.320539	0.409625	DDX20
ENSG00000064726	132.872	0.317925	0.261873	1.21404	0.224732	0.305609	BTBD1
ENSG00000064763	152.751	-0.886529	0.232116	-3.81934	0.00013381	0.000532702	FAR2
ENSG00000064787	83.0662	-2.00967	0.421733	-4.76527	1.88598e-06	1.44357e-05	BCAS1
ENSG00000064886	29.468	-1.94297	0.577413	-3.36495	0.000765565	0.00238664	CHI3L2
ENSG00000064932	164.618	-0.396814	0.256461	-1.54727	0.121798	0.183175	SBNO2
ENSG00000064933	319.834	-0.428267	0.189776	-2.2567	0.0240271	0.046309	PMS1
ENSG00000064961	386.147	1.05981	0.201354	5.26344	1.41388e-07	1.5878e-06	HMG20B
ENSG00000064989	10.0399	0.331914	0.799515	0.415145	0.678036	0.744639	CALCRL
ENSG00000064995	555.257	0.561548	0.203852	2.75468	0.00587494	0.0138762	TAF11
ENSG00000064999	706.825	0.152556	0.138779	1.09927	0.271649	0.358241	ANKS1A
ENSG00000065000	1174.63	0.484355	0.145111	3.33782	0.000844386	0.00259517	AP3D1
ENSG00000065029	244.161	0.214769	0.184668	1.163	0.244829	0.328302	ZNF76
ENSG00000065054	32.1476	1.08697	0.437588	2.484	0.0129917	0.027382	SLC9A3R2
ENSG00000065057	647.523	0.886208	0.174195	5.08744	3.62922e-07	3.51164e-06	NTHL1
ENSG00000065060	308.737	-0.503962	0.169541	-2.97251	0.00295375	0.00764581	UHRF1BP1
ENSG00000065135	1240.58	0.658924	0.146566	4.49574	6.93271e-06	4.32864e-05	GNAI3
ENSG00000065150	602.373	-0.131766	0.181369	-0.726508	0.467527	0.55539	IPO5
ENSG00000065154	406.219	0.926191	0.240349	3.85353	0.000116428	0.000473559	OAT
ENSG00000065183	108.239	-0.18028	0.275229	-0.655018	0.512456	0.598427	WDR3
ENSG00000065243	495.333	-0.616844	0.174391	-3.53714	0.00040449	0.00137669	PKN2
ENSG00000065268	909.839	0.922004	0.157038	5.87121	4.32635e-09	8.25002e-08	WDR18
ENSG00000065308	107.297	-0.366956	0.262137	-1.39987	0.161553	0.232013	TRAM2
ENSG00000065320	294.013	-0.121579	0.203201	-0.598317	0.549629	0.632818	NTN1
ENSG00000065325	75.9108	-1.75936	0.427205	-4.1183	3.81674e-05	0.000183095	GLP2R
ENSG00000065328	131.462	-0.960694	0.239312	-4.0144	5.95968e-05	0.000267404	MCM10
ENSG00000065357	43.7326	0.0217394	0.359693	0.0604388	0.951806	0.964228	DGKA
ENSG00000065361	74.1735	-1.05676	0.336993	-3.13586	0.00171349	0.00477793	ERBB3
ENSG00000065371	6.82421	-2.26723	0.975808	-2.32344	0.0201554	0.0399167	ROPN1
ENSG00000065413	383.612	-0.505395	0.180494	-2.80007	0.0051091	0.0123065	ANKRD44
ENSG00000065427	981.757	0.434566	0.143984	3.01816	0.00254319	0.00672938	KARS
ENSG00000065457	1057.18	-1.25868	0.15953	-7.88993	3.02347e-15	3.28849e-13	ADAT1
ENSG00000065485	224.782	0.0212308	0.223402	0.095034	0.924288	0.942965	PDIA5
ENSG00000065491	214.48	-0.0646205	0.204246	-0.316386	0.751709	0.806383	TBC1D22B
ENSG00000065518	1644.02	0.536433	0.180702	2.9686	0.00299158	0.00773238	NDUFB4
ENSG00000065526	708.897	-0.676124	0.163399	-4.13786	3.50555e-05	0.000170394	SPEN
ENSG00000065534	193.968	-0.91199	0.229171	-3.97952	6.90557e-05	0.000302301	MYLK
ENSG00000065548	1415.21	0.483535	0.163327	2.96053	0.00307114	0.00791133	ZC3H15
ENSG00000065559	488.184	0.290716	0.178664	1.62717	0.103702	0.159918	MAP2K4
ENSG00000065600	465.525	0.88273	0.170015	5.19207	2.07967e-07	2.18919e-06	TMEM206
ENSG00000065609	422.538	-0.0501584	0.165072	-0.303859	0.761235	0.813499	SNAP91
ENSG00000065613	231.65	-0.311777	0.207628	-1.50161	0.133197	0.197487	SLK
ENSG00000065615	158.397	-0.352305	0.232306	-1.51655	0.12938	0.1928	CYB5R4
ENSG00000065618	22.0542	-1.78392	0.610557	-2.92179	0.00348027	0.00881829	COL17A1
ENSG00000065621	114.467	-0.431757	0.259231	-1.66553	0.095807	0.149444	GSTO2
ENSG00000065665	364.54	0.218444	0.171548	1.27337	0.202885	0.2806	SEC61A2
ENSG00000065675	130.478	-1.58351	0.342405	-4.62466	3.7522e-06	2.56653e-05	PRKCQ
ENSG00000065717	205.968	-0.337249	0.223675	-1.50777	0.131614	0.195617	TLE2
ENSG00000065802	267.546	0.516712	0.195677	2.64064	0.00827492	0.0186617	ASB1
ENSG00000065809	655.011	-0.520036	0.160501	-3.24008	0.00119495	0.00349461	FAM107B
ENSG00000065833	142.396	-1.46469	0.295611	-4.95481	7.24028e-07	6.39788e-06	ME1
ENSG00000065882	508.419	-1.15394	0.174927	-6.59672	4.20358e-11	1.58942e-09	TBC1D1
ENSG00000065883	681.036	-0.656657	0.141166	-4.65166	3.2927e-06	2.2959e-05	CDK13
ENSG00000065911	445.901	1.00988	0.214503	4.70799	2.50169e-06	1.83513e-05	MTHFD2
ENSG00000065923	360.078	0.0919188	0.170303	0.539738	0.589378	0.668351	SLC9A7
ENSG00000065970	169.754	0.187073	0.206757	0.904797	0.365573	0.455383	FOXJ2
ENSG00000065978	2105.57	0.48376	0.161895	2.98811	0.00280704	0.00731658	YBX1
ENSG00000065989	304.599	-0.414993	0.182032	-2.27978	0.0226207	0.044061	PDE4A
ENSG00000066027	92.6498	-0.482259	0.265588	-1.81582	0.0693984	0.113738	PPP2R5A
ENSG00000066032	1228.37	-0.249493	0.133387	-1.87045	0.061422	0.102535	CTNNA2
ENSG00000066044	980.813	0.649929	0.146312	4.44206	8.91015e-06	5.32735e-05	ELAVL1
ENSG00000066056	15.3871	-1.22075	0.666121	-1.83262	0.0668593	0.110305	TIE1
ENSG00000066084	646.707	-0.358154	0.140823	-2.54329	0.0109814	0.0237501	DIP2B
ENSG00000066117	931.213	0.491097	0.160088	3.06767	0.00215732	0.00583363	SMARCD1
ENSG00000066135	388.906	0.92219	0.192692	4.78582	1.70287e-06	1.31842e-05	KDM4A
ENSG00000066136	817.084	0.315715	0.165485	1.90781	0.0564155	0.0956084	NFYC
ENSG00000066185	37.5448	-1.26181	0.437823	-2.882	0.00395159	0.00984265	ZMYND12
ENSG00000066230	22.475	-0.153333	0.498602	-0.307527	0.758442	0.811449	SLC9A3
ENSG00000066248	115.273	-1.67116	0.315973	-5.28893	1.23034e-07	1.41598e-06	NGEF
ENSG00000066279	227.452	-0.367262	0.203976	-1.80052	0.0717785	0.116921	ASPM
ENSG00000066294	10.4716	-2.72635	0.840514	-3.24367	0.00117999	0.00345778	CD84
ENSG00000066322	127.446	1.31566	0.257317	5.11298	3.1711e-07	3.12673e-06	ELOVL1
ENSG00000066336	33.7438	-1.53549	0.538099	-2.85354	0.00432347	0.0106203	SPI1
ENSG00000066379	339.41	0.514486	0.211981	2.42704	0.0152225	0.0313782	ZNRD1
ENSG00000066382	1006.84	-1.98772	0.22696	-8.75803	1.98696e-18	3.97845e-16	MPPED2
ENSG00000066405	18.2203	-1.25143	0.654861	-1.91099	0.0560057	0.0949912	CLDN18
ENSG00000066422	97.3837	-0.581649	0.254926	-2.28164	0.0225108	0.043881	ZBTB11
ENSG00000066427	375.746	-0.382023	0.179716	-2.12571	0.0335277	0.0613775	ATXN3
ENSG00000066455	208.291	0.0356752	0.207175	0.172198	0.863282	0.894398	GOLGA5
ENSG00000066468	531.815	-0.787701	0.173201	-4.5479	5.41846e-06	3.50747e-05	FGFR2
ENSG00000066557	277.52	0.154453	0.176109	0.877034	0.380468	0.470936	LRRC40
ENSG00000066583	292.182	0.809568	0.219326	3.69116	0.000223236	0.000827738	ISOC1
ENSG00000066629	465.778	-0.182738	0.162549	-1.1242	0.260928	0.346384	EML1
ENSG00000066651	354.773	-0.0632957	0.207376	-0.305222	0.760197	0.812833	TRMT11
ENSG00000066654	499.581	0.265149	0.188899	1.40365	0.160422	0.230648	THUMPD1
ENSG00000066697	309.92	0.378154	0.196952	1.92003	0.0548543	0.0934209	MSANTD3
ENSG00000066735	401.001	0.201919	0.188975	1.0685	0.285297	0.373416	KIF26A
ENSG00000066739	163.967	-0.588765	0.205349	-2.86714	0.00414203	0.0102345	ATG2B
ENSG00000066777	595.225	-0.513989	0.149588	-3.43602	0.000590319	0.00190398	ARFGEF1
ENSG00000066813	15.7134	-2.51778	0.652344	-3.85959	0.000113579	0.00046379	ACSM2B
ENSG00000066827	160.813	-1.02756	0.227055	-4.52561	6.02203e-06	3.83567e-05	ZFAT
ENSG00000066855	273.083	-0.070286	0.180863	-0.388615	0.697561	0.761054	MTFR1
ENSG00000066923	526.698	0.385236	0.168903	2.28082	0.0225594	0.0439708	STAG3
ENSG00000066926	100.687	0.0119598	0.260794	0.0458592	0.963422	0.972864	FECH
ENSG00000066933	639.831	-0.458125	0.139216	-3.29075	0.000999222	0.00299478	MYO9A
ENSG00000067057	484.655	1.23152	0.28135	4.37717	1.20232e-05	6.85427e-05	PFKP
ENSG00000067064	2184.25	0.948731	0.191351	4.95807	7.11987e-07	6.31365e-06	IDI1
ENSG00000067066	316.103	-0.230999	0.228723	-1.00995	0.312518	0.401911	SP100
ENSG00000067082	1053.49	1.00469	0.143077	7.02205	2.18641e-12	1.26725e-10	KLF6
ENSG00000067113	483.573	-0.258942	0.168714	-1.5348	0.124833	0.186998	PLPP1
ENSG00000067141	907.478	-0.067475	0.139122	-0.485005	0.627673	0.701929	NEO1
ENSG00000067167	309.65	0.609568	0.204167	2.98563	0.00282999	0.00736551	TRAM1
ENSG00000067177	92.5349	-0.811798	0.269606	-3.01105	0.00260343	0.00685788	PHKA1
ENSG00000067182	123.695	0.0940711	0.243573	0.386214	0.699338	0.762616	TNFRSF1A
ENSG00000067191	290.218	0.855545	0.222946	3.83746	0.000124313	0.000499748	CACNB1
ENSG00000067208	559.648	-0.659222	0.150782	-4.37202	1.23102e-05	6.98624e-05	EVI5
ENSG00000067221	311.715	0.916627	0.241074	3.80226	0.000143384	0.000563935	STOML1
ENSG00000067225	2780.91	0.892839	0.131805	6.77394	1.25321e-11	5.59027e-10	PKM
ENSG00000067248	351.611	0.132847	0.197984	0.670998	0.502222	0.588805	DHX29
ENSG00000067334	396.167	0.292966	0.180838	1.62005	0.105222	0.161824	DNTTIP2
ENSG00000067365	182.761	0.270457	0.211228	1.2804	0.200404	0.277844	METTL22
ENSG00000067369	474.581	-0.168661	0.15551	-1.08457	0.278112	0.365615	TP53BP1
ENSG00000067445	375.927	0.881085	0.193469	4.55415	5.25989e-06	3.42116e-05	TRO
ENSG00000067533	454.415	0.245443	0.177311	1.38425	0.166282	0.237777	RRP15
ENSG00000067560	2774.32	0.559914	0.156399	3.58004	0.000343539	0.00120102	RHOA
ENSG00000067596	329.855	-0.68428	0.185268	-3.69346	0.000221222	0.00082131	DHX8
ENSG00000067606	325.573	0.205266	0.192606	1.06573	0.286546	0.374829	PRKCZ
ENSG00000067646	19.1191	-2.05837	0.607621	-3.38759	0.000705107	0.00222548	ZFY
ENSG00000067704	630.893	0.163633	0.166724	0.981457	0.326367	0.415775	IARS2
ENSG00000067715	1930.63	0.441263	0.134078	3.29109	0.000997997	0.00299212	SYT1
ENSG00000067798	456.213	-1.02467	0.168663	-6.07523	1.23807e-09	2.82575e-08	NAV3
ENSG00000067829	1135.57	1.06842	0.155738	6.86035	6.86911e-12	3.35274e-10	IDH3G
ENSG00000067836	401.343	1.17753	0.267274	4.40571	1.05436e-05	6.14751e-05	ROGDI
ENSG00000067840	769.427	0.672413	0.234105	2.87228	0.00407526	0.0100936	PDZD4
ENSG00000067842	58.5796	-0.0773525	0.356351	-0.217068	0.828155	0.867521	ATP2B3
ENSG00000067900	781.832	-0.29988	0.14516	-2.06586	0.0388416	0.0696084	ROCK1
ENSG00000067955	458.708	-0.259213	0.16434	-1.5773	0.114726	0.173904	CBFB
ENSG00000067992	724.156	0.985382	0.153542	6.41768	1.38362e-10	4.41657e-09	PDK3
ENSG00000068001	295.125	1.0691	0.27082	3.94764	7.89248e-05	0.000339847	HYAL2
ENSG00000068024	435.725	-0.141817	0.162498	-0.872727	0.382812	0.473045	HDAC4
ENSG00000068028	337.378	0.58061	0.195161	2.97503	0.00292963	0.00759008	RASSF1
ENSG00000068078	626.093	1.46375	0.230647	6.34628	2.20584e-10	6.55428e-09	FGFR3
ENSG00000068079	46.6214	0.166317	0.433653	0.383526	0.70133	0.764267	IFI35
ENSG00000068097	96.7959	-0.290155	0.259885	-1.11648	0.264219	0.350014	HEATR6
ENSG00000068120	332.779	1.17377	0.193755	6.058	1.37826e-09	3.11745e-08	COASY
ENSG00000068137	121.053	1.07016	0.280749	3.8118	0.000137956	0.000545876	PLEKHH3
ENSG00000068305	492.141	-0.577273	0.151207	-3.81776	0.00013467	0.000535278	MEF2A
ENSG00000068308	654.565	0.708127	0.15656	4.52303	6.09617e-06	3.87778e-05	OTUD5
ENSG00000068323	312.619	1.14548	0.171773	6.66855	2.5834e-11	1.03926e-09	TFE3
ENSG00000068354	235.16	0.1796	0.196685	0.913138	0.36117	0.451335	TBC1D25
ENSG00000068366	421.54	-0.0679128	0.159752	-0.425115	0.670753	0.739036	ACSL4
ENSG00000068383	115.988	-0.627478	0.254836	-2.46228	0.0138057	0.028839	INPP5A
ENSG00000068394	352.424	1.08185	0.175147	6.1768	6.54137e-10	1.67771e-08	GPKOW
ENSG00000068400	715.617	0.743886	0.150254	4.95086	7.38869e-07	6.49321e-06	GRIPAP1
ENSG00000068438	319.411	1.06649	0.228369	4.67004	3.01135e-06	2.14038e-05	FTSJ1
ENSG00000068489	421.851	0.0350331	0.170636	0.205309	0.837331	0.874142	PRR11
ENSG00000068615	808.749	0.339349	0.181133	1.87349	0.0610014	0.101902	REEP1
ENSG00000068650	321.307	-0.28618	0.180016	-1.58975	0.111892	0.170312	ATP11A
ENSG00000068654	179.135	-0.292991	0.222908	-1.31441	0.18871	0.263999	POLR1A
ENSG00000068697	2036.86	1.20508	0.188901	6.37945	1.77724e-10	5.44609e-09	LAPTM4A
ENSG00000068724	132.41	-0.58567	0.253463	-2.31068	0.0208508	0.0411457	TTC7A
ENSG00000068745	1719.42	0.53059	0.147484	3.59761	0.000321153	0.00113242	IP6K2
ENSG00000068781	32.779	-0.894813	0.453305	-1.97397	0.0483846	0.0839441	STON1-GTF2A1L
ENSG00000068784	295.642	-0.5176	0.213199	-2.42778	0.0151915	0.0313325	SRBD1
ENSG00000068796	756.738	-0.271627	0.156725	-1.73314	0.0830708	0.132322	KIF2A
ENSG00000068831	50.3361	-0.832055	0.349496	-2.38073	0.0172786	0.0349298	RASGRP2
ENSG00000068878	517.65	-0.52484	0.156301	-3.35789	0.000785405	0.00243856	PSME4
ENSG00000068885	134.782	0.535495	0.228754	2.34092	0.0192365	0.0382991	IFT80
ENSG00000068903	643.856	1.11477	0.196646	5.66895	1.43679e-08	2.32901e-07	SIRT2
ENSG00000068912	465.653	0.431777	0.182644	2.36404	0.0180771	0.0362943	ERLEC1
ENSG00000068971	369.474	0.959881	0.278351	3.44846	0.000563798	0.00182982	PPP2R5B
ENSG00000068976	21.1975	-0.0911518	0.525019	-0.173616	0.862167	0.893453	PYGM
ENSG00000068985	7.51985	-2.17624	0.963053	-2.25973	0.0238381	0.0460354	PAGE1
ENSG00000069011	50.7103	0.925374	1.62404	0.569797	0.568815	0.650264	PITX1
ENSG00000069018	35.4729	-1.74838	0.48897	-3.57563	0.000349383	0.00121809	TRPC7
ENSG00000069020	334.707	-0.947971	0.214047	-4.42879	9.47629e-06	5.62007e-05	MAST4
ENSG00000069122	36.2518	-2.15994	0.483384	-4.46837	7.88178e-06	4.82715e-05	ADGRF5
ENSG00000069188	683.892	-0.127892	0.170503	-0.750087	0.453202	0.542046	SDK2
ENSG00000069248	261.022	-0.514213	0.220779	-2.32909	0.0198543	0.0393778	NUP133
ENSG00000069275	4152.47	0.00548433	0.168697	0.0325101	0.974065	0.981249	NUCKS1
ENSG00000069329	930.595	0.399897	0.158433	2.52408	0.0116003	0.0248446	VPS35
ENSG00000069345	551.986	0.5613	0.172815	3.24798	0.00116227	0.00341264	DNAJA2
ENSG00000069399	23.2166	0.214214	0.527838	0.405833	0.684866	0.750783	BCL3
ENSG00000069424	255.073	0.174051	0.193258	0.900614	0.367794	0.457793	KCNAB2
ENSG00000069431	49.7119	-1.50099	0.408513	-3.67429	0.000238511	0.000876081	ABCC9
ENSG00000069482	39.4642	1.57079	0.630209	2.49249	0.0126853	0.0268292	GAL
ENSG00000069493	402.721	0.693332	0.238476	2.90735	0.00364509	0.0091781	CLEC2D
ENSG00000069509	716.191	0.913094	0.177067	5.15678	2.51226e-07	2.55873e-06	FUNDC1
ENSG00000069535	111.229	0.849294	0.279237	3.04148	0.0023542	0.00629455	MAOB
ENSG00000069667	276.91	-1.12153	0.220544	-5.0853	3.6704e-07	3.54369e-06	RORA
ENSG00000069696	13.9173	0.414367	0.609345	0.68002	0.496492	0.583096	DRD4
ENSG00000069702	294.678	-1.27679	0.310112	-4.11718	3.83532e-05	0.000183837	TGFBR3
ENSG00000069764	90.899	-0.852707	0.283729	-3.00536	0.00265266	0.00696985	PLA2G10
ENSG00000069812	27.2718	-0.979946	0.526688	-1.86058	0.0628032	0.104484	HES2
ENSG00000069849	2377.02	1.12758	0.159244	7.08087	1.43251e-12	8.5853e-11	ATP1B3
ENSG00000069869	203.268	-1.28303	0.28294	-4.53464	5.77028e-06	3.70121e-05	NEDD4
ENSG00000069943	67.9631	0.229142	0.293906	0.779641	0.435602	0.5247	PIGB
ENSG00000069956	1070.4	-0.0723541	0.140995	-0.513167	0.607834	0.684698	MAPK6
ENSG00000069966	670.923	0.328627	0.161925	2.0295	0.0424076	0.075075	GNB5
ENSG00000069974	258.513	-0.874913	0.217579	-4.02113	5.79197e-05	0.000261276	RAB27A
ENSG00000069998	761.187	1.16005	0.16303	7.11556	1.1146e-12	6.79364e-11	HDHD5
ENSG00000070010	1109.39	1.00473	0.149877	6.70373	2.03166e-11	8.40323e-10	UFD1
ENSG00000070018	511.607	-0.851547	0.155897	-5.46225	4.70126e-08	6.3327e-07	LRP6
ENSG00000070019	40.6958	-2.31282	0.505072	-4.57918	4.66797e-06	3.08629e-05	GUCY2C
ENSG00000070031	1.80927	3.21525	1.9724	1.63012	0.103075		SCT
ENSG00000070047	266.282	0.0353332	0.228137	0.154877	0.876918	0.905916	PHRF1
ENSG00000070061	218.18	-0.106022	0.188766	-0.561659	0.574348	0.655017	ELP1
ENSG00000070081	1173.39	0.263086	0.132678	1.98289	0.04738	0.0824937	NUCB2
ENSG00000070087	2890.48	0.556999	0.20519	2.71455	0.0066366	0.0154047	PFN2
ENSG00000070159	94.4096	-1.62478	0.341963	-4.75134	2.02072e-06	1.52549e-05	PTPN3
ENSG00000070182	86.9318	-1.09765	0.314616	-3.48884	0.000485118	0.00160818	SPTB
ENSG00000070190	29.7652	-1.50505	0.541669	-2.77854	0.00546031	0.0130243	DAPP1
ENSG00000070193	23.5846	-1.29573	0.590075	-2.19588	0.0281007	0.0527524	FGF10
ENSG00000070214	496.978	-0.300714	0.185787	-1.6186	0.105534	0.162147	SLC44A1
ENSG00000070269	203.401	-0.490547	0.20684	-2.37162	0.0177102	0.0356836	TMEM260
ENSG00000070366	824.046	-0.666053	0.173725	-3.83396	0.000126098	0.000506167	SMG6
ENSG00000070367	645.797	0.143809	0.158565	0.906943	0.364437	0.454515	EXOC5
ENSG00000070371	239.901	-0.880779	0.229202	-3.84282	0.000121631	0.000490468	CLTCL1
ENSG00000070388	30.7798	-0.788452	0.444848	-1.77241	0.0763266	0.123146	FGF22
ENSG00000070404	65.2357	1.09635	0.299676	3.65845	0.000253745	0.000923948	FSTL3
ENSG00000070413	982.016	0.45377	0.164075	2.76563	0.00568129	0.0134712	DGCR2
ENSG00000070423	263.878	0.95288	0.224192	4.25029	2.13491e-05	0.000111491	RNF126
ENSG00000070444	443.526	0.247764	0.182572	1.35707	0.174758	0.247846	MNT
ENSG00000070476	481.811	0.0946787	0.191708	0.49387	0.621398	0.696497	ZXDC
ENSG00000070495	542.619	0.739233	0.152632	4.84324	1.27737e-06	1.0315e-05	JMJD6
ENSG00000070501	654.236	0.38263	0.178399	2.1448	0.0319687	0.0589276	POLB
ENSG00000070526	27.6867	-1.73894	0.482003	-3.60773	0.000308886	0.00109774	ST6GALNAC1
ENSG00000070540	66.93	1.75141	0.309702	5.65514	1.55718e-08	2.48527e-07	WIPI1
ENSG00000070601	16.0229	-0.999208	0.636025	-1.57102	0.116178	0.175788	FRMPD1
ENSG00000070610	326.539	0.877342	0.21861	4.01329	5.98794e-05	0.000268424	GBA2
ENSG00000070614	497.278	0.210339	0.182952	1.14969	0.250272	0.334551	NDST1
ENSG00000070669	107.135	1.02342	0.264163	3.87419	0.000106982	0.00044022	ASNS
ENSG00000070718	222.544	0.55727	0.202696	2.74929	0.0059724	0.0140659	AP3M2
ENSG00000070729	191.359	0.265193	0.222963	1.1894	0.23428	0.316687	CNGB1
ENSG00000070731	37.6184	-1.43108	0.452781	-3.16064	0.00157426	0.00443743	ST6GALNAC2
ENSG00000070748	10.5198	-3.02441	0.882265	-3.42801	0.000608028	0.00195358	CHAT
ENSG00000070756	1408.86	0.20174	0.167977	1.201	0.22975	0.3114	PABPC1
ENSG00000070759	383.934	-1.7445	0.23781	-7.33568	2.20595e-13	1.654e-11	TESK2
ENSG00000070761	1490.91	0.667046	0.169514	3.93505	8.31808e-05	0.000355653	CFAP20
ENSG00000070770	817.665	0.459019	0.155768	2.94682	0.00321062	0.00821896	CSNK2A2
ENSG00000070778	297.883	-0.56141	0.167172	-3.35828	0.000784283	0.00243551	PTPN21
ENSG00000070785	785.554	0.0537698	0.151673	0.354511	0.722956	0.782462	EIF2B3
ENSG00000070808	196.502	-0.211469	0.242561	-0.871818	0.383308	0.473525	CAMK2A
ENSG00000070814	332.648	0.346865	0.222899	1.55615	0.119672	0.180393	TCOF1
ENSG00000070831	2096.85	1.31876	0.243048	5.42594	5.76505e-08	7.54121e-07	CDC42
ENSG00000070882	148.169	-0.902352	0.264106	-3.41663	0.000634007	0.00202507	OSBPL3
ENSG00000070886	16.2825	-0.36047	0.661246	-0.545138	0.585658	0.664897	EPHA8
ENSG00000070915	58.4587	-1.84019	0.550456	-3.34302	0.000828728	0.00255551	SLC12A3
ENSG00000070950	238.269	-0.584733	0.193905	-3.01557	0.00256497	0.00677582	RAD18
ENSG00000070961	720.882	-0.0122927	0.217401	-0.0565437	0.954909	0.966538	ATP2B1
ENSG00000070985	4.56685	0.345091	1.24204	0.277841	0.781134	0.829782	TRPM5
ENSG00000071051	615.249	-0.14525	0.158939	-0.913875	0.360782	0.450978	NCK2
ENSG00000071054	2566.06	0.169308	0.146855	1.15289	0.248955	0.3331	MAP4K4
ENSG00000071073	208.885	-0.710588	0.205152	-3.46372	0.000532758	0.00174483	MGAT4A
ENSG00000071082	6066.05	0.297337	0.183513	1.62025	0.105179	0.161772	RPL31
ENSG00000071127	842.785	0.812121	0.154539	5.25513	1.47919e-07	1.64749e-06	WDR1
ENSG00000071189	295.231	-0.274016	0.182103	-1.50473	0.132394	0.196511	SNX13
ENSG00000071203	13.008	-2.70333	0.820592	-3.29437	0.000986441	0.002961	MS4A12
ENSG00000071205	309.702	-1.5766	0.275698	-5.71857	1.07423e-08	1.80956e-07	ARHGAP10
ENSG00000071242	747.347	-0.0680442	0.172124	-0.39532	0.692606	0.757245	RPS6KA2
ENSG00000071243	270.765	0.212357	0.187397	1.13319	0.257135	0.342173	ING3
ENSG00000071246	318.483	0.615221	0.23102	2.66307	0.00774317	0.0176227	VASH1
ENSG00000071282	80.0297	1.35785	0.526627	2.57839	0.0099262	0.0217564	LMCD1
ENSG00000071462	1442.9	1.02464	0.151854	6.74755	1.50358e-11	6.49341e-10	BUD23
ENSG00000071537	270.45	-0.423744	0.19352	-2.18967	0.0285484	0.0534961	SEL1L
ENSG00000071539	197.887	0.537092	0.276359	1.94346	0.0519609	0.0891567	TRIP13
ENSG00000071553	1901.95	1.40416	0.152009	9.23735	2.52688e-20	6.5476e-18	ATP6AP1
ENSG00000071564	711.404	0.303461	0.185365	1.6371	0.10161	0.157243	TCF3
ENSG00000071575	965.101	0.110029	0.174588	0.630219	0.528551	0.613226	TRIB2
ENSG00000071626	807.384	0.496768	0.150324	3.30466	0.000950928	0.00287103	DAZAP1
ENSG00000071655	759.561	0.358062	0.196778	1.81963	0.0688156	0.112951	MBD3
ENSG00000071794	372.806	-0.230916	0.167701	-1.37695	0.168528	0.240306	HLTF
ENSG00000071859	990.207	1.20646	0.177847	6.78371	1.17126e-11	5.29167e-10	FAM50A
ENSG00000071889	233.702	0.970905	0.218508	4.44334	8.85747e-06	5.30124e-05	FAM3A
ENSG00000071894	469.44	0.679241	0.216505	3.1373	0.00170513	0.00476063	CPSF1
ENSG00000071909	364.059	-1.44015	0.195437	-7.36889	1.72058e-13	1.3474e-11	MYO3B
ENSG00000071967	103.211	-0.571815	0.313503	-1.82395	0.0681593	0.112031	CYBRD1
ENSG00000071991	31.712	-2.56621	0.505492	-5.07665	3.84141e-07	3.67457e-06	CDH19
ENSG00000071994	405.775	0.601385	0.203159	2.96017	0.00307468	0.00791697	PDCD2
ENSG00000072041	287.626	1.4706	0.22932	6.41288	1.42801e-10	4.54178e-09	SLC6A15
ENSG00000072042	1255.48	1.04994	0.130436	8.04948	8.31492e-16	9.96659e-14	RDH11
ENSG00000072062	574.332	0.230959	0.172499	1.3389	0.180603	0.254578	PRKACA
ENSG00000072071	1108.26	0.38345	0.179252	2.13916	0.0324226	0.0596436	ADGRL1
ENSG00000072080	18.7359	-1.88756	0.597976	-3.15659	0.00159626	0.00449157	SPP2
ENSG00000072110	408.052	0.429647	0.214211	2.00572	0.0448864	0.0788491	ACTN1
ENSG00000072121	227.661	-0.0916041	0.187693	-0.488054	0.625512	0.699912	ZFYVE26
ENSG00000072133	136.772	-0.476409	0.220285	-2.16269	0.030565	0.0566841	RPS6KA6
ENSG00000072134	807.344	-0.14389	0.172886	-0.83228	0.405251	0.495213	EPN2
ENSG00000072135	118.363	0.324999	0.251969	1.28984	0.197107	0.273858	PTPN18
ENSG00000072163	18.252	-1.03665	0.565736	-1.8324	0.066892	0.110339	LIMS2
ENSG00000072182	99.1037	1.42474	0.381089	3.73861	0.000185042	0.000706795	ASIC4
ENSG00000072195	243.394	-0.0747128	0.184905	-0.404061	0.686168	0.751883	SPEG
ENSG00000072201	22.3703	0.660687	0.562415	1.17473	0.240102	0.322896	LNX1
ENSG00000072210	578.231	0.451984	0.154516	2.92516	0.00344274	0.00873576	ALDH3A2
ENSG00000072274	280.301	-0.326427	0.216836	-1.50541	0.132219	0.1963	TFRC
ENSG00000072310	180.49	0.230468	0.267461	0.86169	0.388858	0.479019	SREBF1
ENSG00000072315	84.1337	-1.66881	0.40921	-4.07812	4.54005e-05	0.000212521	TRPC5
ENSG00000072364	873.358	0.0841269	0.13359	0.629738	0.528866	0.613551	AFF4
ENSG00000072401	725.154	0.680223	0.194568	3.49606	0.000472175	0.00157124	UBE2D1
ENSG00000072415	331.944	-0.306004	0.17059	-1.7938	0.0728457	0.118441	MPP5
ENSG00000072422	178.742	0.165873	0.214464	0.773433	0.439266	0.528427	RHOBTB1
ENSG00000072501	429.778	-0.517597	0.156662	-3.30392	0.000953446	0.00287765	SMC1A
ENSG00000072506	1629.99	0.875313	0.187816	4.66047	3.15491e-06	2.22092e-05	HSD17B10
ENSG00000072518	678.612	0.142399	0.193674	0.735253	0.462185	0.550623	MARK2
ENSG00000072571	125.386	-0.545135	0.308992	-1.76424	0.0776922	0.125029	HMMR
ENSG00000072609	420.894	-0.126015	0.169268	-0.74447	0.456592	0.545372	CHFR
ENSG00000072657	175.637	-0.837027	0.237551	-3.52356	0.000425788	0.00143862	TRHDE
ENSG00000072682	111.317	0.0215863	0.353002	0.0611508	0.951239	0.963765	P4HA2
ENSG00000072694	4.65545	-1.4237	1.1972	-1.18919	0.234363	0.316751	FCGR2B
ENSG00000072736	526.657	-0.737181	0.157779	-4.67224	2.97927e-06	2.11929e-05	NFATC3
ENSG00000072756	237.447	0.556379	0.197344	2.81934	0.00481222	0.011676	TRNT1
ENSG00000072778	562.121	1.57142	0.169356	9.2788	1.71399e-20	4.79373e-18	ACADVL
ENSG00000072786	334.873	-1.02695	0.221775	-4.6306	3.64614e-06	2.50625e-05	STK10
ENSG00000072803	857.115	0.063291	0.137181	0.461369	0.644534	0.716087	FBXW11
ENSG00000072818	71.4043	-0.186825	0.302645	-0.617307	0.537033	0.621389	ACAP1
ENSG00000072832	4924.97	0.892	0.184478	4.83526	1.32971e-06	1.06789e-05	CRMP1
ENSG00000072840	89.9875	-0.334096	0.285288	-1.17108	0.241566	0.324519	EVC
ENSG00000072849	428.262	0.845641	0.168192	5.02784	4.96035e-07	4.59766e-06	DERL2
ENSG00000072858	70.2677	-1.46759	0.466873	-3.14344	0.00166974	0.00467517	SIDT1
ENSG00000072864	275.263	-0.574415	0.182797	-3.14237	0.00167585	0.00468855	NDE1
ENSG00000072952	69.1211	-0.598026	0.321717	-1.85886	0.063047	0.10485	MRVI1
ENSG00000072954	235.85	-0.0251383	0.238197	-0.105535	0.915951	0.936893	TMEM38A
ENSG00000072958	1040.2	0.943073	0.156383	6.03052	1.63431e-09	3.59507e-08	AP1M1
ENSG00000073008	186.017	0.863199	0.248297	3.47647	0.000508053	0.00167294	PVR
ENSG00000073050	334.774	0.634197	0.186826	3.39459	0.000687325	0.0021758	XRCC1
ENSG00000073060	256.126	-0.0219129	0.218093	-0.100475	0.919967	0.940081	SCARB1
ENSG00000073067	5.12289	-0.954166	1.05598	-0.903583	0.366217	0.456088	CYP2W1
ENSG00000073111	147.408	0.104982	0.217533	0.482602	0.629378	0.703345	MCM2
ENSG00000073146	126.104	-1.91489	0.325738	-5.87862	4.13713e-09	7.993e-08	MOV10L1
ENSG00000073150	33.4105	0.466713	0.426757	1.09363	0.274119	0.36093	PANX2
ENSG00000073169	121.858	0.400079	0.278671	1.43567	0.151097	0.219451	SELENOO
ENSG00000073282	127.227	-1.96293	0.387422	-5.06664	4.04904e-07	3.84688e-06	TP63
ENSG00000073331	138.399	-0.585723	0.3	-1.95241	0.0508896	0.0876172	ALPK1
ENSG00000073350	116.628	-1.56315	0.308899	-5.06039	4.18401e-07	3.95505e-06	LLGL2
ENSG00000073417	236.663	-0.580259	0.184671	-3.14213	0.00167724	0.00469095	PDE8A
ENSG00000073464	445.608	0.72537	0.159477	4.54843	5.40484e-06	3.50251e-05	CLCN4
ENSG00000073536	125.005	0.58216	0.231855	2.51089	0.0120428	0.0256646	NLE1
ENSG00000073578	507.94	0.359455	0.15073	2.38476	0.0170904	0.0346288	SDHA
ENSG00000073584	692.478	0.544162	0.194817	2.79319	0.00521904	0.0125251	SMARCE1
ENSG00000073598	22.4159	-1.20188	0.531203	-2.26256	0.0236629	0.0457472	FNDC8
ENSG00000073605	63.0512	-0.352919	0.325591	-1.08394	0.278394	0.365924	GSDMB
ENSG00000073614	544.497	-0.385761	0.18061	-2.13587	0.0326899	0.0600246	KDM5A
ENSG00000073670	67.1521	0.35208	0.333623	1.05532	0.291277	0.379636	ADAM11
ENSG00000073711	629.413	-0.262935	0.143359	-1.8341	0.0666399	0.110005	PPP2R3A
ENSG00000073712	263.243	-0.330416	0.234676	-1.40797	0.159141	0.229052	FERMT2
ENSG00000073734	48.8361	-2.31888	0.424171	-5.46685	4.58096e-08	6.1952e-07	ABCB11
ENSG00000073737	8.57235	-2.0164	0.858373	-2.34909	0.0188194	0.0375961	DHRS9
ENSG00000073754	29.0255	-1.94169	0.546179	-3.55504	0.000377917	0.0012993	CD5L
ENSG00000073792	1393.71	-0.317311	0.167629	-1.89293	0.058367	0.098367	IGF2BP2
ENSG00000073803	1373.66	0.0520223	0.133091	0.390879	0.695887	0.75996	MAP3K13
ENSG00000073849	460.162	-0.916712	0.164813	-5.56214	2.66482e-08	3.95237e-07	ST6GAL1
ENSG00000073861	13.7697	-2.47911	0.730571	-3.39339	0.000690326	0.00218376	TBX21
ENSG00000073910	731.835	-0.545291	0.151369	-3.6024	0.000315294	0.00111593	FRY
ENSG00000073921	1294.87	0.268877	0.131236	2.0488	0.0404813	0.0721797	PICALM
ENSG00000073969	560.577	-0.520638	0.164704	-3.16105	0.00157201	0.00443253	NSF
ENSG00000074047	418.591	-0.437721	0.169322	-2.58514	0.00973384	0.0214093	GLI2
ENSG00000074054	1173.92	-0.276745	0.143431	-1.92947	0.0536729	0.0916659	CLASP1
ENSG00000074071	1541.39	0.697388	0.186888	3.73159	0.000190275	0.00072349	MRPS34
ENSG00000074181	375.901	-0.509983	0.194316	-2.6245	0.00867761	0.0194306	NOTCH3
ENSG00000074201	1749.77	0.252104	0.157309	1.6026	0.109022	0.16662	CLNS1A
ENSG00000074211	183.604	-0.76581	0.217511	-3.52079	0.000430266	0.00145235	PPP2R2C
ENSG00000074219	265.386	0.416638	0.188895	2.20566	0.0274077	0.0516938	TEAD2
ENSG00000074266	385.079	0.619431	0.162236	3.81808	0.000134492	0.00053481	EED
ENSG00000074276	157.879	-0.383051	0.240691	-1.59146	0.111506	0.169842	CDHR2
ENSG00000074317	212.122	2.2702	0.217144	10.4548	1.39285e-25	7.91676e-23	SNCB
ENSG00000074319	1593.07	0.9054	0.17246	5.24993	1.52161e-07	1.68834e-06	TSG101
ENSG00000074356	515.235	0.258864	0.16085	1.60935	0.10754	0.164727	NCBP3
ENSG00000074370	66.0106	-0.934246	0.370265	-2.52318	0.0116298	0.0249018	ATP2A3
ENSG00000074410	331.655	0.164839	0.217688	0.757224	0.448915	0.538161	CA12
ENSG00000074416	270.753	-1.09854	0.22837	-4.81036	1.50657e-06	1.18498e-05	MGLL
ENSG00000074527	249.165	-1.13104	0.191245	-5.91409	3.3372e-09	6.63674e-08	NTN4
ENSG00000074582	431.523	1.04911	0.195526	5.3656	8.06825e-08	9.95537e-07	BCS1L
ENSG00000074590	204.995	-0.0876885	0.224282	-0.390975	0.695816	0.75995	NUAK1
ENSG00000074603	431.808	-0.238336	0.175196	-1.3604	0.173705	0.246531	DPP8
ENSG00000074621	65.8561	-0.929006	0.333593	-2.78485	0.0053553	0.0128085	SLC24A1
ENSG00000074657	845.242	-0.288945	0.17553	-1.64613	0.0997368	0.154684	ZNF532
ENSG00000074660	27.6661	-1.66297	0.519042	-3.20391	0.00135574	0.00389946	SCARF1
ENSG00000074695	202.585	-0.035324	0.265951	-0.132822	0.894334	0.919515	LMAN1
ENSG00000074696	1926.86	0.623078	0.143586	4.3394	1.42872e-05	7.92635e-05	HACD3
ENSG00000074706	142.115	-1.47398	0.29685	-4.96542	6.85529e-07	6.09744e-06	IPCEF1
ENSG00000074755	303.987	-0.685793	0.196335	-3.49297	0.000477679	0.00158626	ZZEF1
ENSG00000074771	26.1773	-1.86869	0.552691	-3.38108	0.000722022	0.00227179	NOX3
ENSG00000074800	5860.3	1.29047	0.211503	6.10144	1.05116e-09	2.46296e-08	ENO1
ENSG00000074803	56.5231	-1.59205	0.373508	-4.26242	2.02226e-05	0.000106556	SLC12A1
ENSG00000074842	1059.78	0.869866	0.163461	5.32156	1.02881e-07	1.22411e-06	MYDGF
ENSG00000074855	106.298	0.409378	0.260532	1.57131	0.11611	0.1757	ANO8
ENSG00000074935	99.8727	0.6732	0.258341	2.60586	0.00916441	0.0203576	TUBE1
ENSG00000074964	386.247	-0.000427562	0.18346	-0.00233055	0.99814	0.998934	ARHGEF10L
ENSG00000074966	35.6279	-2.52312	0.572637	-4.40615	1.05226e-05	6.13932e-05	TXK
ENSG00000075035	162.073	-0.72702	0.233871	-3.10864	0.00187951	0.00518832	WSCD2
ENSG00000075043	1043.47	0.953161	0.202811	4.69975	2.60476e-06	1.89652e-05	KCNQ2
ENSG00000075073	8.76144	0.180851	0.738015	0.24505	0.806418	0.850301	TACR2
ENSG00000075089	437.223	0.728462	0.20203	3.60572	0.000311292	0.00110361	ACTR6
ENSG00000075131	327.164	-0.348957	0.212312	-1.64361	0.100258	0.155396	TIPIN
ENSG00000075142	1397.07	0.732974	0.1791	4.09255	4.26664e-05	0.000201442	SRI
ENSG00000075151	1775.41	-0.382729	0.15625	-2.44946	0.0143069	0.0297308	EIF4G3
ENSG00000075188	291.363	0.585541	0.258009	2.26946	0.0232402	0.0450437	NUP37
ENSG00000075213	426.963	-0.957749	0.173936	-5.50633	3.66385e-08	5.14978e-07	SEMA3A
ENSG00000075218	314.364	-0.345947	0.187501	-1.84504	0.0650312	0.107703	GTSE1
ENSG00000075223	313.381	-0.807692	0.22066	-3.66035	0.000251868	0.000918061	SEMA3C
ENSG00000075234	109.307	0.407145	0.270362	1.50593	0.132086	0.196169	TTC38
ENSG00000075239	883.962	0.926287	0.175086	5.29047	1.22002e-07	1.40748e-06	ACAT1
ENSG00000075240	273.092	0.10514	0.198562	0.529508	0.596453	0.674536	GRAMD4
ENSG00000075275	310.32	-0.799428	0.243423	-3.28411	0.00102306	0.00305118	CELSR1
ENSG00000075290	28.3738	-0.585556	0.471047	-1.24309	0.213833	0.293575	WNT8B
ENSG00000075292	780.707	-0.52122	0.154909	-3.36469	0.000766311	0.00238854	ZNF638
ENSG00000075303	108.061	-0.0766382	0.257942	-0.297114	0.766379	0.817904	SLC25A40
ENSG00000075336	300.521	0.516928	0.197685	2.61492	0.00892493	0.019906	TIMM21
ENSG00000075340	1439.86	0.695114	0.153994	4.51391	6.36433e-06	4.02742e-05	ADD2
ENSG00000075391	879.35	-0.441064	0.168559	-2.61667	0.00887921	0.0198266	RASAL2
ENSG00000075399	195.553	1.00744	0.258202	3.90175	9.55004e-05	0.000399506	VPS9D1
ENSG00000075407	154.198	-0.0266354	0.214836	-0.12398	0.901331	0.924631	ZNF37A
ENSG00000075413	1372.16	0.216222	0.151735	1.425	0.154158	0.223117	MARK3
ENSG00000075415	4141.2	0.801346	0.161086	4.97464	6.53685e-07	5.8458e-06	SLC25A3
ENSG00000075420	744.913	-1.17658	0.183637	-6.40706	1.4835e-10	4.68445e-09	FNDC3B
ENSG00000075426	80.7894	0.53214	0.441399	1.20557	0.227982	0.309312	FOSL2
ENSG00000075429	40.449	-1.69603	0.473551	-3.58151	0.00034161	0.00119523	CACNG5
ENSG00000075461	605.989	-0.13044	0.182055	-0.716488	0.47369	0.560689	CACNG4
ENSG00000075539	677.528	-0.490622	0.151663	-3.23495	0.00121664	0.00354494	FRYL
ENSG00000075568	681.284	-0.646108	0.143427	-4.5048	6.64369e-06	4.17184e-05	TMEM131
ENSG00000075618	2954.26	0.625846	0.126979	4.92873	8.27661e-07	7.16628e-06	FSCN1
ENSG00000075624	42145.2	0.826553	0.178752	4.62402	3.76365e-06	2.57336e-05	ACTB
ENSG00000075643	109.628	-1.29195	0.347238	-3.72065	0.000198708	0.000749247	MOCOS
ENSG00000075651	154.896	-1.92998	0.328629	-5.87281	4.28461e-09	8.18815e-08	PLD1
ENSG00000075673	32.774	-1.23802	0.447568	-2.7661	0.00567316	0.0134573	ATP12A
ENSG00000075702	151.805	-0.273975	0.240997	-1.13684	0.255606	0.34055	WDR62
ENSG00000075711	645.699	-0.763128	0.164675	-4.63414	3.58421e-06	2.47213e-05	DLG1
ENSG00000075785	2262.48	1.05974	0.150903	7.02267	2.17663e-12	1.26575e-10	RAB7A
ENSG00000075790	250.082	0.159683	0.201717	0.791615	0.428585	0.518089	BCAP29
ENSG00000075826	61.8931	-0.0997132	0.297453	-0.335223	0.737457	0.794302	SEC31B
ENSG00000075856	319.948	-0.0376832	0.185319	-0.203342	0.838867	0.875331	SART3
ENSG00000075884	93.3415	-1.66273	0.412491	-4.03095	5.55523e-05	0.000252601	ARHGAP15
ENSG00000075886	2.81156	-0.163112	1.29359	-0.126093	0.899658		TUBA3D
ENSG00000075891	61.2667	-0.587953	0.373981	-1.57215	0.115916	0.175513	PAX2
ENSG00000075914	898.343	0.825153	0.144642	5.70481	1.1647e-08	1.93604e-07	EXOSC7
ENSG00000075945	488.934	0.112635	0.200257	0.562453	0.573807	0.65457	KIFAP3
ENSG00000075975	335	0.569795	0.173666	3.28098	0.00103446	0.00308153	MKRN2
ENSG00000076003	393.495	-0.230584	0.183346	-1.25764	0.20852	0.287198	MCM6
ENSG00000076043	627.513	0.911877	0.190765	4.78011	1.75198e-06	1.35324e-05	REXO2
ENSG00000076053	267.881	0.709798	0.186111	3.81385	0.000136821	0.000542358	RBM7
ENSG00000076067	346.685	-0.64949	0.187612	-3.46188	0.000536408	0.00175516	RBMS2
ENSG00000076108	412.312	0.101311	0.176369	0.574426	0.56568	0.64731	BAZ2A
ENSG00000076201	246.345	0.0483259	0.205835	0.234779	0.81438	0.856526	PTPN23
ENSG00000076242	256.147	-0.0274523	0.176332	-0.155685	0.876281	0.90547	MLH1
ENSG00000076248	672.561	0.359164	0.1451	2.47528	0.0133132	0.0279444	UNG
ENSG00000076258	49.1775	-0.157261	0.383614	-0.409947	0.681845	0.74817	FMO4
ENSG00000076321	341.788	-0.0964465	0.17025	-0.5665	0.571054	0.652443	KLHL20
ENSG00000076344	4.63063	-1.0224	1.02397	-0.998468	0.318053	0.407115	RGS11
ENSG00000076351	61.8419	0.999963	0.319648	3.12833	0.00175805	0.00488978	SLC46A1
ENSG00000076356	630.017	-0.428681	0.183765	-2.33276	0.0196605	0.0390375	PLXNA2
ENSG00000076382	167.12	-0.0455753	0.228864	-0.199137	0.842156	0.878035	SPAG5
ENSG00000076513	218.13	0.0806609	0.187523	0.43014	0.667094	0.735879	ANKRD13A
ENSG00000076554	490.515	-1.10639	0.182845	-6.05096	1.43985e-09	3.23598e-08	TPD52
ENSG00000076555	262.131	-1.18436	0.2602	-4.55174	5.32043e-06	3.45416e-05	ACACB
ENSG00000076604	435.141	0.819209	0.25149	3.25742	0.00112431	0.00331608	TRAF4
ENSG00000076641	481.801	0.14258	0.190029	0.750304	0.453072	0.541927	PAG1
ENSG00000076650	238.633	-0.665917	0.194795	-3.41856	0.000629532	0.0020135	GPATCH1
ENSG00000076662	17.8054	-1.36723	0.620929	-2.20191	0.0276718	0.0520812	ICAM3
ENSG00000076685	595.303	-0.728051	0.161429	-4.51004	6.48141e-06	4.08742e-05	NT5C2
ENSG00000076706	154.781	0.354779	0.219093	1.61931	0.10538	0.161967	MCAM
ENSG00000076716	985.988	-0.20551	0.151414	-1.35727	0.174694	0.247775	GPC4
ENSG00000076770	90.4768	-0.724808	0.264542	-2.73986	0.00614656	0.0144115	MBNL3
ENSG00000076826	230.958	0.683636	0.24809	2.7556	0.00585851	0.013843	CAMSAP3
ENSG00000076864	226.604	-0.0991485	0.200526	-0.494443	0.620994	0.696272	RAP1GAP
ENSG00000076924	209.428	0.400572	0.208069	1.92519	0.0542058	0.0924684	XAB2
ENSG00000076928	61.6154	0.136815	0.30864	0.443282	0.657562	0.727779	ARHGEF1
ENSG00000076944	42.1427	1.05631	0.531783	1.98635	0.0469943	0.0819111	STXBP2
ENSG00000076984	472.127	0.797744	0.264333	3.01795	0.00254494	0.00673222	MAP2K7
ENSG00000077009	49.706	-0.732684	0.405	-1.8091	0.0704359	0.115095	NMRK2
ENSG00000077044	350.582	-0.152372	0.163296	-0.933106	0.350765	0.440865	DGKD
ENSG00000077063	264.68	-1.00492	0.196859	-5.10479	3.31168e-07	3.24718e-06	CTTNBP2
ENSG00000077080	1279.89	0.90996	0.211396	4.30452	1.67347e-05	9.08115e-05	ACTL6B
ENSG00000077092	194.125	-1.53469	0.213601	-7.18485	6.72798e-13	4.34238e-11	RARB
ENSG00000077097	1265.74	-0.19147	0.176079	-1.08741	0.276857	0.364264	TOP2B
ENSG00000077147	810.963	-0.086557	0.171391	-0.505027	0.61354	0.68967	TM9SF3
ENSG00000077150	35.0671	0.312499	0.431423	0.724346	0.468853	0.556235	NFKB2
ENSG00000077152	1449.2	0.470168	0.193091	2.43495	0.0148938	0.0307621	UBE2T
ENSG00000077157	528.197	-0.490072	0.15272	-3.20896	0.00133215	0.00383662	PPP1R12B
ENSG00000077232	394.415	0.314282	0.197863	1.58838	0.112201	0.170636	DNAJC10
ENSG00000077235	262.931	-0.267279	0.180489	-1.48086	0.138645	0.204428	GTF3C1
ENSG00000077238	75.8959	-1.75614	0.409161	-4.29205	1.77028e-05	9.53602e-05	IL4R
ENSG00000077254	516.778	-0.140284	0.151568	-0.925551	0.354679	0.444832	USP33
ENSG00000077264	3409.92	0.363063	0.180605	2.01026	0.044404	0.0781149	PAK3
ENSG00000077274	47.3525	-1.23597	0.453992	-2.72244	0.00648023	0.0150795	CAPN6
ENSG00000077279	6716.89	0.221507	0.181149	1.22279	0.22141	0.301883	DCX
ENSG00000077312	1143.8	0.700249	0.149224	4.69261	2.69735e-06	1.94986e-05	SNRPA
ENSG00000077327	162.958	0.513015	0.274768	1.86708	0.0618901	0.103209	SPAG6
ENSG00000077348	288.653	0.107635	0.205225	0.524474	0.599949	0.677461	EXOSC5
ENSG00000077380	2361.73	0.404226	0.145469	2.77877	0.00545654	0.0130171	DYNC1I2
ENSG00000077420	135.766	-2.03852	0.380452	-5.35816	8.40741e-08	1.03232e-06	APBB1IP
ENSG00000077454	23.6952	1.4848	0.649751	2.28518	0.022302	0.0435511	LRCH4
ENSG00000077458	180.48	0.201996	0.221195	0.913205	0.361135	0.451322	FAM76B
ENSG00000077463	415.173	1.29591	0.192793	6.7218	1.79499e-11	7.53039e-10	SIRT6
ENSG00000077498	37.4589	-0.984862	0.422757	-2.32962	0.0198264	0.0393357	TYR
ENSG00000077514	466.018	-0.44881	0.168111	-2.66973	0.00759131	0.0173128	POLD3
ENSG00000077522	88.1224	-1.09504	0.29434	-3.72032	0.000198971	0.000750079	ACTN2
ENSG00000077549	2686.18	0.739792	0.197655	3.74285	0.000181942	0.000697069	CAPZB
ENSG00000077585	192.4	-0.389636	0.195094	-1.99717	0.0458068	0.0801505	GPR137B
ENSG00000077616	150.548	-0.331779	0.23279	-1.42523	0.154091	0.223061	NAALAD2
ENSG00000077684	481.826	-0.152005	0.174772	-0.869735	0.384445	0.474664	JADE1
ENSG00000077713	127.16	-1.26379	0.236388	-5.34628	8.97827e-08	1.09101e-06	SLC25A43
ENSG00000077721	670.779	0.810747	0.210012	3.86048	0.000113166	0.000462322	UBE2A
ENSG00000077782	979.905	0.260083	0.157125	1.65526	0.0978713	0.152192	FGFR1
ENSG00000077800	51.9943	-1.83764	0.395036	-4.65183	3.29004e-06	2.29495e-05	FKBP6
ENSG00000077935	93.7419	-1.68157	0.412302	-4.0785	4.53266e-05	0.000212352	SMC1B
ENSG00000077942	1378.74	0.976723	0.215695	4.52826	5.94711e-06	3.7946e-05	FBLN1
ENSG00000077943	183.69	-1.72327	0.280497	-6.14364	8.06505e-10	1.9875e-08	ITGA8
ENSG00000077984	6.26918	-0.74629	0.900124	-0.829096	0.40705	0.497173	CST7
ENSG00000078018	3097.47	-0.0704838	0.131815	-0.534718	0.592845	0.671292	MAP2
ENSG00000078043	536.266	0.0682781	0.150992	0.452198	0.651126	0.721926	PIAS2
ENSG00000078053	324.549	-0.416758	0.177472	-2.3483	0.0188595	0.0376548	AMPH
ENSG00000078061	121.52	1.15316	0.251642	4.58256	4.59311e-06	3.04251e-05	ARAF
ENSG00000078070	468.58	0.115158	0.149799	0.768745	0.442045	0.531334	MCCC1
ENSG00000078081	64.7528	-1.09267	0.378315	-2.88824	0.00387402	0.00967819	LAMP3
ENSG00000078098	27.2816	-1.85562	0.501382	-3.70101	0.000214741	0.000800621	FAP
ENSG00000078114	590.778	-0.783816	0.185542	-4.22447	2.39508e-05	0.000122964	NEBL
ENSG00000078124	352.951	-0.32248	0.184395	-1.74886	0.0803158	0.12875	ACER3
ENSG00000078140	1600.09	-0.0312758	0.159516	-0.196067	0.844558	0.880071	UBE2K
ENSG00000078142	295.465	-0.307896	0.182181	-1.69005	0.0910178	0.143152	PIK3C3
ENSG00000078177	768.971	-0.349452	0.145065	-2.40893	0.0159992	0.0327418	N4BP2
ENSG00000078237	210.217	1.87268	0.261758	7.15425	8.41289e-13	5.31309e-11	TIGAR
ENSG00000078246	644.017	-1.05982	0.147448	-7.18773	6.5878e-13	4.26754e-11	TULP3
ENSG00000078269	154.968	-1.52167	0.239419	-6.35568	2.07513e-10	6.20776e-09	SYNJ2
ENSG00000078295	430.699	-0.209243	0.213803	-0.978675	0.327741	0.417224	ADCY2
ENSG00000078304	1035.44	0.145914	0.13705	1.06467	0.287023	0.375331	PPP2R5C
ENSG00000078328	2299.81	-1.31878	0.199502	-6.61038	3.83327e-11	1.4718e-09	RBFOX1
ENSG00000078369	3046.48	0.178401	0.160867	1.109	0.267432	0.353579	GNB1
ENSG00000078399	2.52497	2.82595	1.84101	1.535	0.124784		HOXA9
ENSG00000078401	9.68545	0.0524599	0.723876	0.0724709	0.942227	0.957497	EDN1
ENSG00000078403	1247.34	-0.408029	0.147875	-2.75928	0.00579293	0.0137082	MLLT10
ENSG00000078487	67.84	-0.789836	0.299786	-2.63466	0.00842206	0.0189451	ZCWPW1
ENSG00000078549	136.48	-0.0114892	0.261927	-0.0438643	0.965013	0.974191	ADCYAP1R1
ENSG00000078579	2.38546	-0.806183	1.43972	-0.559958	0.575508		FGF20
ENSG00000078596	34.7845	-0.177295	0.508623	-0.348578	0.727406	0.786226	ITM2A
ENSG00000078618	901.903	0.202781	0.150026	1.35164	0.176491	0.249741	NRDC
ENSG00000078668	2915.02	0.962583	0.174346	5.5211	3.36883e-08	4.787e-07	VDAC3
ENSG00000078674	833.741	-0.425154	0.143447	-2.96383	0.00303833	0.00783826	PCM1
ENSG00000078687	1001.63	-0.214527	0.151856	-1.4127	0.157745	0.227508	TNRC6C
ENSG00000078699	892.659	-0.0564011	0.144004	-0.391663	0.695307	0.759536	CBFA2T2
ENSG00000078725	475.123	0.117565	0.209636	0.560804	0.574931	0.655248	BRINP1
ENSG00000078747	4448.45	-1.37937	0.187514	-7.35609	1.89375e-13	1.45078e-11	ITCH
ENSG00000078795	125.423	-1.34917	0.314195	-4.29406	1.75436e-05	9.47052e-05	PKD2L2
ENSG00000078804	247.657	0.9131	0.248258	3.67804	0.000235037	0.000865306	TP53INP2
ENSG00000078808	365.062	1.09633	0.255356	4.29331	1.76025e-05	9.49363e-05	SDF4
ENSG00000078814	36.9122	-0.315041	0.405533	-0.776855	0.437244	0.526426	MYH7B
ENSG00000078900	19.3095	-0.151679	0.507787	-0.298706	0.765164	0.816855	TP73
ENSG00000078902	789.267	1.37898	0.197325	6.98838	2.78079e-12	1.5221e-10	TOLLIP
ENSG00000078967	125.584	0.405322	0.236091	1.7168	0.0860153	0.136078	UBE2D4
ENSG00000079101	86.3865	-0.874186	0.290341	-3.0109	0.00260478	0.00686042	CLUL1
ENSG00000079102	1358.18	-1.11879	0.199833	-5.59863	2.16053e-08	3.28864e-07	RUNX1T1
ENSG00000079112	55.4383	-1.82095	0.402393	-4.52531	6.03075e-06	3.83894e-05	CDH17
ENSG00000079134	282.097	-0.240797	0.182522	-1.31928	0.187077	0.262152	THOC1
ENSG00000079150	226.965	0.628842	0.193373	3.25196	0.00114611	0.0033708	FKBP7
ENSG00000079156	403.98	-0.373356	0.155608	-2.39934	0.0164247	0.0334609	OSBPL6
ENSG00000079215	331.801	-1.6054	0.195752	-8.20117	2.38056e-16	3.17769e-14	SLC1A3
ENSG00000079246	1380.82	-0.182735	0.174984	-1.0443	0.296347	0.385133	XRCC5
ENSG00000079257	26.6656	0.800474	0.496303	1.61287	0.106772	0.163765	LXN
ENSG00000079263	24.5818	-1.77192	0.531024	-3.33681	0.000847472	0.00260283	SP140
ENSG00000079277	162.437	-0.100799	0.217809	-0.462783	0.64352	0.715427	MKNK1
ENSG00000079308	118.494	0.130247	0.258636	0.503591	0.614549	0.690431	TNS1
ENSG00000079313	176.55	-0.0120206	0.20694	-0.0580875	0.953679	0.965626	REXO1
ENSG00000079332	1237.65	0.709244	0.163716	4.33217	1.47646e-05	8.16289e-05	SAR1A
ENSG00000079335	167.749	-0.991593	0.245018	-4.04702	5.18737e-05	0.000237406	CDC14A
ENSG00000079337	9.69236	0.962878	0.754681	1.27587	0.202	0.279669	RAPGEF3
ENSG00000079385	13.2817	-0.22134	0.6761	-0.327377	0.743382	0.799463	CEACAM1
ENSG00000079387	163.398	-0.7083	0.213726	-3.31406	0.000919528	0.00279058	SENP1
ENSG00000079393	5.03721	-0.776759	0.997464	-0.778734	0.436136	0.525236	DUSP13
ENSG00000079432	431.898	0.581775	0.188265	3.09019	0.00200028	0.00546264	CIC
ENSG00000079435	77.4508	0.571198	0.367013	1.55634	0.119627	0.180372	LIPE
ENSG00000079459	3927.47	1.18525	0.161006	7.36154	1.81796e-13	1.40493e-11	FDFT1
ENSG00000079462	4240.3	0.887627	0.20641	4.30032	1.70554e-05	9.2381e-05	PAFAH1B3
ENSG00000079482	501.061	-1.27044	0.17673	-7.18862	6.54511e-13	4.25553e-11	OPHN1
ENSG00000079616	596.013	0.313239	0.15244	2.05484	0.0398945	0.0712778	KIF22
ENSG00000079689	689.909	0.888603	0.272334	3.26292	0.0011027	0.00325891	SCGN
ENSG00000079691	288.52	-1.04514	0.18259	-5.72398	1.0406e-08	1.76132e-07	CARMIL1
ENSG00000079739	313.813	0.484683	0.203242	2.38476	0.0170903	0.0346288	PGM1
ENSG00000079785	637.342	0.0434174	0.189789	0.228767	0.81905	0.86	DDX1
ENSG00000079805	790.709	-0.0303617	0.146349	-0.207461	0.83565	0.873111	DNM2
ENSG00000079819	292.994	-0.984508	0.232836	-4.22833	2.35432e-05	0.000121154	EPB41L2
ENSG00000079841	288.012	-0.642168	0.175461	-3.6599	0.000252316	0.000919125	RIMS1
ENSG00000079931	378.307	-1.55319	0.251857	-6.16695	6.96208e-10	1.76e-08	MOXD1
ENSG00000079950	852.197	0.81173	0.172794	4.69767	2.63143e-06	1.91278e-05	STX7
ENSG00000079974	325.818	0.749691	0.223343	3.35669	0.000788828	0.00244832	RABL2B
ENSG00000079999	666.22	0.350479	0.152817	2.29346	0.0218217	0.0427648	KEAP1
ENSG00000080007	35.9458	-1.74826	0.507787	-3.44291	0.000575497	0.0018633	DDX43
ENSG00000080031	45.9015	-0.921587	0.36461	-2.52759	0.0114847	0.024645	PTPRH
ENSG00000080166	46.0761	-0.324716	0.363929	-0.89225	0.372259	0.462437	DCT
ENSG00000080189	257.808	0.763299	0.202501	3.76937	0.00016366	0.000634056	SLC35C2
ENSG00000080200	47.9805	-1.01399	0.382791	-2.64893	0.00807479	0.0182642	CRYBG3
ENSG00000080224	198.009	-2.32528	0.341124	-6.81652	9.32734e-12	4.41329e-10	EPHA6
ENSG00000080293	55.9396	-1.73873	0.403983	-4.30397	1.67763e-05	9.10093e-05	SCTR
ENSG00000080298	715.335	-0.468247	0.156328	-2.99529	0.0027418	0.00716985	RFX3
ENSG00000080345	381.572	-0.708538	0.163378	-4.3368	1.44575e-05	8.01325e-05	RIF1
ENSG00000080371	812.262	0.205329	0.17527	1.1715	0.241396	0.324365	RAB21
ENSG00000080493	292.174	-1.67833	0.229305	-7.31921	2.49438e-13	1.83895e-11	SLC4A4
ENSG00000080503	363.313	-0.698964	0.178746	-3.91036	9.21579e-05	0.000388567	SMARCA2
ENSG00000080511	11.1935	-1.42829	0.727802	-1.96248	0.0497071	0.0858582	RDH8
ENSG00000080546	311.157	0.0762676	0.192618	0.395952	0.69214	0.757015	SESN1
ENSG00000080561	45.2214	-0.813132	0.369289	-2.20189	0.0276734	0.0520812	MID2
ENSG00000080572	11.4897	-1.40982	0.723497	-1.94861	0.0513417	0.088249	PIH1D3
ENSG00000080573	118.574	-1.34592	0.255455	-5.26873	1.37375e-07	1.55163e-06	COL5A3
ENSG00000080603	57.7021	-0.332519	0.318872	-1.0428	0.297042	0.385843	SRCAP
ENSG00000080608	374.687	-0.287946	0.161141	-1.78692	0.0739499	0.119927	PUM3
ENSG00000080644	189.807	2.33244	0.257604	9.05434	1.374e-19	3.31641e-17	CHRNA3
ENSG00000080709	125.674	-0.677952	0.335124	-2.02299	0.0430742	0.0761098	KCNN2
ENSG00000080802	649.921	-0.367191	0.139875	-2.62514	0.00866126	0.0194113	CNOT4
ENSG00000080815	587.781	-0.0983488	0.145331	-0.676724	0.498581	0.585128	PSEN1
ENSG00000080819	137.546	0.905322	0.26109	3.46747	0.000525391	0.00172359	CPOX
ENSG00000080822	318.328	1.12966	0.200372	5.63783	1.72207e-08	2.70918e-07	CLDND1
ENSG00000080823	336.335	-0.795926	0.182719	-4.35601	1.32457e-05	7.43988e-05	MOK
ENSG00000080824	4912.14	0.383497	0.150636	2.54585	0.0109011	0.0236026	HSP90AA1
ENSG00000080839	488.335	-1.03131	0.172764	-5.96945	2.38052e-09	4.94049e-08	RBL1
ENSG00000080845	1718.72	0.00451379	0.169984	0.0265543	0.978815	0.985028	DLGAP4
ENSG00000080854	60.426	-0.437666	0.373665	-1.17128	0.241486	0.324462	IGSF9B
ENSG00000080910	4.9987	-2.30208	1.21111	-1.9008	0.0573276	0.0969304	CFHR2
ENSG00000080986	348.619	-0.247756	0.194194	-1.27582	0.20202	0.279669	NDC80
ENSG00000081014	249.025	-0.601697	0.203478	-2.95706	0.00310585	0.00798789	AP4E1
ENSG00000081019	758.013	0.392101	0.161587	2.42656	0.0152428	0.0314127	RSBN1
ENSG00000081026	606.991	-0.354098	0.1569	-2.25684	0.0240182	0.0462977	MAGI3
ENSG00000081051	315.396	-2.2654	1.71079	-1.32418	0.185444	0.260422	AFP
ENSG00000081052	107.687	-2.06522	0.324616	-6.36203	1.99102e-10	5.99689e-09	COL4A4
ENSG00000081059	75.8461	0.379573	0.283296	1.33984	0.180296	0.254227	TCF7
ENSG00000081087	371.598	0.362405	0.161394	2.24547	0.0247383	0.0474514	OSTM1
ENSG00000081138	328.295	0.468253	0.212966	2.19872	0.0278978	0.0524385	CDH7
ENSG00000081148	41.0799	-1.83201	0.397285	-4.61133	4.00103e-06	2.70834e-05	IMPG2
ENSG00000081154	759.411	0.411296	0.17533	2.34584	0.0189843	0.0378784	PCNP
ENSG00000081177	310.485	0.361044	0.168054	2.14839	0.0316832	0.0584562	EXD2
ENSG00000081181	811.761	0.829506	0.18372	4.51505	6.33005e-06	4.00775e-05	ARG2
ENSG00000081189	353.816	-0.274495	0.171999	-1.59591	0.110508	0.168541	MEF2C
ENSG00000081237	28.8898	-1.35691	0.452009	-3.00195	0.00268254	0.00703474	PTPRC
ENSG00000081248	24.4628	-2.11977	0.55264	-3.83571	0.000125203	0.000503096	CACNA1S
ENSG00000081277	7.85921	-1.3293	0.812952	-1.63515	0.102018	0.157818	PKP1
ENSG00000081307	280.395	0.634143	0.203459	3.11681	0.00182819	0.00506092	UBA5
ENSG00000081320	158.065	-0.232282	0.243806	-0.952733	0.340725	0.430611	STK17B
ENSG00000081377	434.368	-0.386564	0.16237	-2.38076	0.0172771	0.0349298	CDC14B
ENSG00000081386	135.068	-0.452077	0.231956	-1.94897	0.0512985	0.0881833	ZNF510
ENSG00000081479	240.234	-0.566911	0.217006	-2.61242	0.00899034	0.020029	LRP2
ENSG00000081665	173.807	-0.079045	0.199438	-0.396339	0.691855	0.756863	ZNF506
ENSG00000081692	173.368	0.78716	0.24518	3.21054	0.00132488	0.00381944	JMJD4
ENSG00000081721	507.721	0.844772	0.189747	4.45211	8.5031e-06	5.12922e-05	DUSP12
ENSG00000081760	356.077	-0.0118628	0.164509	-0.0721106	0.942514	0.957596	AACS
ENSG00000081791	327.143	0.875794	0.177549	4.9327	8.11001e-07	7.04627e-06	DELE1
ENSG00000081800	24.9186	-2.18591	0.584708	-3.73847	0.000185144	0.00070703	SLC13A1
ENSG00000081803	360.148	0.120406	0.22272	0.540616	0.588772	0.667879	CADPS2
ENSG00000081818	8.81243	-0.450828	0.760114	-0.593106	0.553111	0.635795	PCDHB4
ENSG00000081842	23.2648	-3.16056	0.668602	-4.72712	2.27732e-06	1.69309e-05	PCDHA6
ENSG00000081870	619.806	0.29131	0.158869	1.83365	0.0667065	0.110105	HSPB11
ENSG00000081913	773.38	-0.825228	0.163851	-5.03646	4.74215e-07	4.42333e-06	PHLPP1
ENSG00000081923	156.95	-1.49387	0.268764	-5.55829	2.7243e-08	4.01355e-07	ATP8B1
ENSG00000081985	118.142	-1.61268	0.308605	-5.22572	1.73482e-07	1.88922e-06	IL12RB2
ENSG00000082014	336.028	0.695755	0.203891	3.41239	0.000643969	0.00205334	SMARCD3
ENSG00000082068	811.329	-0.649936	0.146241	-4.44429	8.81823e-06	5.28135e-05	WDR70
ENSG00000082074	98.9673	-1.82181	0.336971	-5.40645	6.42871e-08	8.2381e-07	FYB1
ENSG00000082126	38.4266	-1.62082	0.504333	-3.21378	0.00131001	0.00378275	MPP4
ENSG00000082146	185.428	0.279037	0.215386	1.29552	0.195142	0.271402	STRADB
ENSG00000082153	2116.4	0.588183	0.144983	4.0569	4.97292e-05	0.000229319	BZW1
ENSG00000082175	71.6974	-1.95262	0.405261	-4.81817	1.44882e-06	1.14785e-05	PGR
ENSG00000082196	39.7746	1.62768	0.437143	3.72346	0.000196514	0.000742247	C1QTNF3
ENSG00000082212	519.999	0.064815	0.153322	0.422739	0.672486	0.740298	ME2
ENSG00000082213	151.6	0.379408	0.250089	1.51709	0.129244	0.192614	C5orf22
ENSG00000082258	348.576	-0.277193	0.181077	-1.5308	0.125819	0.188195	CCNT2
ENSG00000082269	350.844	-0.715201	0.165894	-4.31119	1.62376e-05	8.83865e-05	FAM135A
ENSG00000082293	184.628	-1.85956	0.293644	-6.3327	2.40913e-10	7.0396e-09	COL19A1
ENSG00000082397	420.072	0.177797	0.16924	1.05056	0.293462	0.382144	EPB41L3
ENSG00000082438	119.264	-1.37215	0.367401	-3.73475	0.000187901	0.000715697	COBLL1
ENSG00000082458	391.681	-0.0595416	0.178816	-0.332977	0.739152	0.795885	DLG3
ENSG00000082482	143.653	-1.75092	0.235403	-7.43796	1.02253e-13	8.45869e-12	KCNK2
ENSG00000082497	330.288	-1.48555	0.230653	-6.44062	1.18987e-10	3.90421e-09	SERTAD4
ENSG00000082512	55.1255	-1.07228	0.378876	-2.83017	0.0046524	0.0113288	TRAF5
ENSG00000082515	1038.9	1.00929	0.168128	6.00308	1.93606e-09	4.145e-08	MRPL22
ENSG00000082516	111.554	-1.1107	0.272456	-4.07662	4.56959e-05	0.000213605	GEMIN5
ENSG00000082556	26.1346	0.233225	0.456245	0.511184	0.609222	0.685954	OPRK1
ENSG00000082641	715.769	0.833227	0.154436	5.39529	6.84133e-08	8.68896e-07	NFE2L1
ENSG00000082684	696	0.220238	0.186421	1.1814	0.237443	0.319956	SEMA5B
ENSG00000082701	1249.71	-0.123039	0.163118	-0.754296	0.450672	0.539752	GSK3B
ENSG00000082781	235.15	-0.51404	0.241477	-2.12873	0.0332764	0.0609491	ITGB5
ENSG00000082805	1220.74	-0.580122	0.167752	-3.45822	0.000543753	0.00177293	ERC1
ENSG00000082898	1032.95	-0.228703	0.153858	-1.48645	0.137159	0.202594	XPO1
ENSG00000082996	336.062	0.808167	0.200693	4.02688	5.65222e-05	0.000256021	RNF13
ENSG00000083067	379.513	-0.209907	0.253867	-0.826838	0.408329	0.498493	TRPM3
ENSG00000083093	89.6712	-0.369038	0.258207	-1.42923	0.152938	0.221554	PALB2
ENSG00000083097	183.092	-0.635539	0.21664	-2.93361	0.00335041	0.00852111	DOP1A
ENSG00000083099	591.52	0.898264	0.174226	5.15574	2.52631e-07	2.56858e-06	LYRM2
ENSG00000083123	323.148	-0.0179266	0.187191	-0.0957666	0.923706	0.942754	BCKDHB
ENSG00000083168	890.376	-0.177987	0.137837	-1.29128	0.196605	0.273244	KAT6A
ENSG00000083223	184.377	-0.396628	0.202218	-1.96139	0.0498341	0.086044	TUT7
ENSG00000083290	535.303	-0.256717	0.175859	-1.45979	0.144348	0.211387	ULK2
ENSG00000083307	149.554	-1.69586	0.278772	-6.08333	1.17715e-09	2.71484e-08	GRHL2
ENSG00000083312	937.839	-0.0226269	0.174825	-0.129426	0.897021	0.92155	TNPO1
ENSG00000083444	200.386	-0.109378	0.239435	-0.456815	0.647804	0.71883	PLOD1
ENSG00000083454	10.5562	0.0633029	0.731079	0.0865884	0.930999	0.948329	P2RX5
ENSG00000083457	536.78	-0.142878	0.18752	-0.761935	0.446099	0.535404	ITGAE
ENSG00000083520	210.602	-0.121506	0.201083	-0.60426	0.545671	0.629029	DIS3
ENSG00000083535	623.365	-0.62309	0.166674	-3.73837	0.000185219	0.000707162	PIBF1
ENSG00000083544	314.304	-0.506566	0.16991	-2.98138	0.00286953	0.00745469	TDRD3
ENSG00000083635	254.549	0.275743	0.178999	1.54047	0.123446	0.185243	NUFIP1
ENSG00000083642	619.829	-0.858858	0.153078	-5.61059	2.01633e-08	3.10558e-07	PDS5B
ENSG00000083720	316.339	-0.265914	0.174151	-1.52691	0.126783	0.189539	OXCT1
ENSG00000083750	402.016	0.905589	0.222681	4.06675	4.76737e-05	0.00022158	RRAGB
ENSG00000083782	7.32814	-1.66918	1.00493	-1.661	0.0967136	0.150631	EPYC
ENSG00000083799	203.796	0.371429	0.190488	1.94988	0.0511901	0.0880313	CYLD
ENSG00000083807	258.642	0.0733252	0.180521	0.406186	0.684606	0.750592	SLC27A5
ENSG00000083812	189.757	0.720601	0.23155	3.11207	0.00185778	0.00513638	ZNF324
ENSG00000083814	64.92	0.717918	0.314276	2.28435	0.0223508	0.0436318	ZNF671
ENSG00000083817	39.8903	0.386575	0.37339	1.03531	0.300523	0.389555	ZNF416
ENSG00000083828	440.996	-0.401294	0.178689	-2.24577	0.0247189	0.0474246	ZNF586
ENSG00000083838	122.419	0.722498	0.26643	2.71177	0.00669245	0.0155152	ZNF446
ENSG00000083844	290.697	0.144128	0.170377	0.845938	0.397588	0.48761	ZNF264
ENSG00000083845	5275.15	0.584357	0.141302	4.1355	3.54179e-05	0.000171871	RPS5
ENSG00000083857	202.611	-0.831382	0.21003	-3.95839	7.54553e-05	0.000326905	FAT1
ENSG00000083896	899.439	-0.0683676	0.135436	-0.504798	0.613701	0.689781	YTHDC1
ENSG00000083937	597.474	0.649283	0.194195	3.34346	0.000827415	0.0025528	CHMP2B
ENSG00000084070	575.018	0.248196	0.155118	1.60004	0.109589	0.167411	SMAP2
ENSG00000084072	825.69	0.908117	0.15897	5.71251	1.11319e-08	1.86803e-07	PPIE
ENSG00000084073	324.625	0.146674	0.207743	0.706037	0.480165	0.566982	ZMPSTE24
ENSG00000084090	810.235	0.0069003	0.162976	0.0423394	0.966228	0.975082	STARD7
ENSG00000084092	196.844	0.286165	0.20866	1.37144	0.170237	0.242449	NOA1
ENSG00000084093	338.577	-0.811296	0.199643	-4.06373	4.8295e-05	0.000223995	REST
ENSG00000084110	16.0524	-1.963	0.636466	-3.08422	0.00204085	0.00555963	HAL
ENSG00000084112	216.866	-0.334701	0.201254	-1.66308	0.0962967	0.150057	SSH1
ENSG00000084207	7574.74	0.964821	0.167556	5.75819	8.50198e-09	1.47446e-07	GSTP1
ENSG00000084234	1275.96	0.185195	0.180529	1.02584	0.304965	0.394271	APLP2
ENSG00000084444	264.808	-0.323235	0.198484	-1.62852	0.103414	0.159601	FAM234B
ENSG00000084453	72.017	-0.773628	0.334608	-2.31204	0.0207754	0.0410247	SLCO1A2
ENSG00000084463	587.035	0.327615	0.179786	1.82225	0.0684175	0.112423	WBP11
ENSG00000084623	2309.32	0.908992	0.147239	6.17357	6.67652e-10	1.70741e-08	EIF3I
ENSG00000084628	671.665	-0.0493383	0.172576	-0.285893	0.77496	0.825063	NKAIN1
ENSG00000084636	25.2539	-0.63	0.467251	-1.34831	0.177558	0.251048	COL16A1
ENSG00000084652	586.99	0.517248	0.147777	3.50019	0.000464927	0.00154976	TXLNA
ENSG00000084674	45.6867	-2.00302	1.07928	-1.85588	0.0634712	0.105486	APOB
ENSG00000084676	1231.57	0.0630329	0.139742	0.451068	0.651941	0.722783	NCOA1
ENSG00000084693	271.688	0.426175	0.195954	2.17487	0.0296397	0.0552239	AGBL5
ENSG00000084710	1197.91	0.242062	0.136034	1.77943	0.0751698	0.121535	EFR3B
ENSG00000084731	1619.37	0.714917	0.170499	4.19308	2.75189e-05	0.000138736	KIF3C
ENSG00000084733	1503.35	0.198758	0.141041	1.40923	0.158768	0.228647	RAB10
ENSG00000084734	55.1124	-1.54293	0.450614	-3.42406	0.000616941	0.00197897	GCKR
ENSG00000084754	668.422	0.160838	0.149085	1.07884	0.280661	0.368306	HADHA
ENSG00000084764	1422.08	1.07692	0.19022	5.66146	1.50087e-08	2.41731e-07	MAPRE3
ENSG00000084774	139.726	-0.383407	0.246857	-1.55316	0.120386	0.181314	CAD
ENSG00000085063	1141.43	0.844431	0.194054	4.35153	1.35189e-05	7.55958e-05	CD59
ENSG00000085117	690.026	2.27863	0.167645	13.592	4.46533e-42	1.12399e-38	CD82
ENSG00000085185	388.815	-0.0185124	0.191381	-0.0967306	0.92294	0.942136	BCORL1
ENSG00000085224	1250.72	-0.531761	0.138336	-3.84397	0.000121058	0.000488893	ATRX
ENSG00000085231	624.621	0.60411	0.176742	3.41803	0.00063076	0.00201641	AK6
ENSG00000085274	152.404	0.395344	0.248426	1.5914	0.11152	0.169848	MYNN
ENSG00000085276	221.507	-1.51781	0.235869	-6.43496	1.23508e-10	4.03001e-09	MECOM
ENSG00000085365	708.843	0.0460302	0.155373	0.296256	0.767034	0.818405	SCAMP1
ENSG00000085377	273.069	-0.188135	0.172604	-1.08998	0.275722	0.36285	PREP
ENSG00000085382	284.818	-0.448406	0.171877	-2.60888	0.00908394	0.0202044	HACE1
ENSG00000085415	409.337	0.124933	0.154912	0.806476	0.419968	0.509386	SEH1L
ENSG00000085433	485.737	0.0522609	0.155279	0.336562	0.736447	0.793554	WDR47
ENSG00000085449	552.448	0.487917	0.149493	3.2638	0.00109928	0.00325042	WDFY1
ENSG00000085465	8.71889	-0.271427	0.90956	-0.298416	0.765385	0.817042	OVGP1
ENSG00000085491	150.124	-0.240144	0.229815	-1.04495	0.296047	0.3848	SLC25A24
ENSG00000085511	258.851	-0.544869	0.188993	-2.883	0.00393901	0.00981689	MAP3K4
ENSG00000085514	161.753	-0.72564	0.264542	-2.74301	0.0060879	0.0142911	PILRA
ENSG00000085552	134.004	0.439899	0.244474	1.79937	0.0719609	0.117164	IGSF9
ENSG00000085563	65.6502	-1.65063	0.427551	-3.86067	0.000113075	0.000462056	ABCB1
ENSG00000085644	93.1339	0.43325	0.315611	1.37274	0.169834	0.241953	ZNF213
ENSG00000085662	1943.04	0.766612	0.156802	4.88906	1.01321e-06	8.47709e-06	AKR1B1
ENSG00000085719	366.326	0.0159064	0.21725	0.0732169	0.941634	0.957046	CPNE3
ENSG00000085721	198.225	0.496534	0.23046	2.15454	0.0311981	0.0576822	RRN3
ENSG00000085733	946.728	0.67225	0.141502	4.75081	2.02603e-06	1.52885e-05	CTTN
ENSG00000085741	14.2071	-0.0507295	1.03768	-0.0488875	0.961009	0.97115	WNT11
ENSG00000085760	221.726	-0.0590388	0.195189	-0.30247	0.762294	0.814383	MTIF2
ENSG00000085788	276.995	0.0338326	0.177502	0.190603	0.848836	0.883372	DDHD2
ENSG00000085831	44.1287	-0.846154	0.404024	-2.09432	0.0362318	0.0655447	TTC39A
ENSG00000085832	525.234	-0.0242521	0.174288	-0.139149	0.889332	0.915306	EPS15
ENSG00000085840	155.073	-0.979176	0.224722	-4.35728	1.31688e-05	7.40025e-05	ORC1
ENSG00000085871	1978.51	-0.466258	0.188807	-2.4695	0.0135302	0.0283541	MGST2
ENSG00000085872	116.974	0.449793	0.239786	1.87581	0.060681	0.101509	CHERP
ENSG00000085978	294.076	-0.0065144	0.216049	-0.0301524	0.975946	0.982806	ATG16L1
ENSG00000085982	191.069	-0.38095	0.20392	-1.86814	0.0617431	0.103012	USP40
ENSG00000085998	188.036	0.486913	0.225675	2.15758	0.0309601	0.0572962	POMGNT1
ENSG00000085999	118.18	0.166823	0.247237	0.67475	0.499835	0.586435	RAD54L
ENSG00000086015	866.816	-0.315352	0.156254	-2.01821	0.0435697	0.0768851	MAST2
ENSG00000086061	3784.45	0.797217	0.154455	5.16149	2.44992e-07	2.50974e-06	DNAJA1
ENSG00000086062	142.19	-0.253477	0.301824	-0.839816	0.401011	0.490682	B4GALT1
ENSG00000086065	1714.98	0.808541	0.18859	4.2873	1.80861e-05	9.71282e-05	CHMP5
ENSG00000086102	411.147	-0.227931	0.15738	-1.44828	0.147538	0.215236	NFX1
ENSG00000086159	5.93564	-0.615135	1.01034	-0.608842	0.542629	0.626507	AQP6
ENSG00000086189	441.952	0.547831	0.193211	2.8354	0.00457677	0.0111671	DIMT1
ENSG00000086200	204.042	-0.805378	0.266411	-3.02306	0.00250231	0.00663416	IPO11
ENSG00000086205	28.915	-2.43546	0.574138	-4.24195	2.21586e-05	0.000115003	FOLH1
ENSG00000086232	496.121	0.135478	0.155463	0.871451	0.383508	0.473673	EIF2AK1
ENSG00000086289	49.2422	-0.105738	0.365869	-0.289004	0.772578	0.822975	EPDR1
ENSG00000086300	247.496	0.0736567	0.186337	0.395288	0.69263	0.757245	SNX10
ENSG00000086475	670.234	0.257005	0.154918	1.65898	0.0971205	0.151198	SEPHS1
ENSG00000086504	1703.19	1.1999	0.158313	7.5793	3.47418e-14	3.15541e-12	MRPL28
ENSG00000086506	11.737	0.472018	0.681784	0.692328	0.488731	0.575496	HBQ1
ENSG00000086544	203.69	0.517904	0.214964	2.40926	0.0159847	0.0327159	ITPKC
ENSG00000086570	33.8039	-0.540631	0.403755	-1.33901	0.180569	0.254565	FAT2
ENSG00000086589	393.203	0.62047	0.172066	3.60599	0.000310961	0.00110288	RBM22
ENSG00000086598	834.772	0.554336	0.198211	2.7967	0.00516272	0.0124052	TMED2
ENSG00000086619	178.965	-0.210849	0.212746	-0.991082	0.321645	0.4108	ERO1B
ENSG00000086666	1207.84	0.695427	0.164102	4.23777	2.25753e-05	0.000116787	ZFAND6
ENSG00000086696	24.3621	-0.646991	0.467505	-1.38392	0.166382	0.237837	HSD17B2
ENSG00000086712	486.17	-0.272514	0.151008	-1.80464	0.0711313	0.116017	TXLNG
ENSG00000086717	210.95	-0.969011	0.290261	-3.33842	0.000842572	0.00259049	PPEF1
ENSG00000086730	182.27	-0.514827	0.251854	-2.04415	0.0409389	0.0728188	LAT2
ENSG00000086758	524.541	-0.169967	0.15447	-1.10032	0.271191	0.357756	HUWE1
ENSG00000086827	175.147	-0.263355	0.24608	-1.0702	0.28453	0.37269	ZW10
ENSG00000086848	152.668	0.642006	0.209275	3.06777	0.00215664	0.00583269	ALG9
ENSG00000086967	59.5416	-1.64947	0.384057	-4.29484	1.74816e-05	9.44575e-05	MYBPC2
ENSG00000086991	132.395	-1.08048	0.26439	-4.08668	4.37588e-05	0.000205959	NOX4
ENSG00000087008	197.745	0.249856	0.210728	1.18568	0.235749	0.318257	ACOX3
ENSG00000087053	354.195	0.227848	0.177063	1.28682	0.198156	0.275183	MTMR2
ENSG00000087074	508.473	1.26215	0.209034	6.03801	1.56026e-09	3.45808e-08	PPP1R15A
ENSG00000087076	389.019	1.93982	0.234343	8.2777	1.25573e-16	1.72859e-14	HSD17B14
ENSG00000087077	199.004	0.965931	0.287868	3.35546	0.000792325	0.00245702	TRIP6
ENSG00000087085	81.3553	1.48372	0.295031	5.02902	4.92997e-07	4.57431e-06	ACHE
ENSG00000087086	4132.06	1.48019	0.13108	11.2922	1.4333e-29	1.3292e-26	FTL
ENSG00000087087	490.979	0.439276	0.167048	2.62964	0.00854754	0.0192004	SRRT
ENSG00000087088	816.596	1.4601	0.171432	8.51711	1.6359e-17	2.82594e-15	BAX
ENSG00000087095	503.58	-0.399399	0.160257	-2.49224	0.0126939	0.0268411	NLK
ENSG00000087111	396.314	1.15275	0.164285	7.01679	2.27024e-12	1.29455e-10	PIGS
ENSG00000087116	171.276	-1.05865	0.299192	-3.53837	0.000402609	0.00137161	ADAMTS2
ENSG00000087128	24.1438	-1.74996	0.608546	-2.87565	0.00403196	0.0100089	TMPRSS11E
ENSG00000087152	325.706	0.397114	0.18309	2.16895	0.0300863	0.0559435	ATXN7L3
ENSG00000087157	426.498	0.477432	0.190577	2.50519	0.0122385	0.0260124	PGS1
ENSG00000087191	2384.68	0.793755	0.15314	5.18322	2.18093e-07	2.27385e-06	PSMC5
ENSG00000087206	744.754	-0.321565	0.163696	-1.96441	0.0494829	0.0855213	UIMC1
ENSG00000087237	17.5873	-2.85425	0.658816	-4.3324	1.47493e-05	8.15945e-05	CETP
ENSG00000087245	191.95	0.614956	0.971782	0.632813	0.526856	0.611764	MMP2
ENSG00000087250	91.0911	1.7473	0.387261	4.51194	6.42361e-06	4.05823e-05	MT3
ENSG00000087253	52.3762	-0.629255	0.447683	-1.40558	0.159849	0.229921	LPCAT2
ENSG00000087258	1307.02	0.385672	0.171519	2.24857	0.02454	0.0471355	GNAO1
ENSG00000087263	310.042	0.501732	0.193844	2.58833	0.00964421	0.0212546	OGFOD1
ENSG00000087266	182.412	-0.0343676	0.283294	-0.121314	0.903442	0.926451	SH3BP2
ENSG00000087269	78.6733	0.407928	0.307243	1.32771	0.184276	0.258968	NOP14
ENSG00000087274	1067.81	0.256447	0.141493	1.81244	0.0699188	0.114426	ADD1
ENSG00000087299	260.299	-0.277595	0.199103	-1.39423	0.163248	0.234047	L2HGDH
ENSG00000087301	404.387	0.0203027	0.158638	0.127982	0.898164	0.922303	TXNDC16
ENSG00000087302	2204.59	0.473202	0.172796	2.7385	0.00617201	0.0144599	RTRAF
ENSG00000087303	50.5502	-0.695818	0.519776	-1.33869	0.180673	0.254635	NID2
ENSG00000087338	223.592	-0.582446	0.18859	-3.08843	0.00201214	0.00548737	GMCL1
ENSG00000087365	850.361	0.131201	0.163752	0.801218	0.423006	0.512399	SF3B2
ENSG00000087448	445.179	0.49252	0.175356	2.80868	0.00497451	0.0120185	KLHL42
ENSG00000087460	5927.23	0.319476	0.177408	1.8008	0.0717346	0.116871	GNAS
ENSG00000087470	801.225	-0.320019	0.145634	-2.19742	0.0279903	0.0525787	DNM1L
ENSG00000087494	6.91926	0.163643	0.848078	0.192957	0.846992	0.881825	PTHLH
ENSG00000087495	340.045	-0.276985	0.182298	-1.5194	0.128661	0.19201	PHACTR3
ENSG00000087502	514.721	0.450244	0.166831	2.69881	0.00695871	0.0160551	ERGIC2
ENSG00000087510	162.847	-0.0209326	0.277118	-0.0755369	0.939788	0.955569	TFAP2C
ENSG00000087586	423.076	0.437797	0.202018	2.16713	0.0302252	0.0561597	AURKA
ENSG00000087589	57.0471	-1.59211	0.427504	-3.72419	0.000195944	0.000740635	CASS4
ENSG00000087842	201.171	1.24	0.232457	5.33433	9.59003e-08	1.15107e-06	PIR
ENSG00000087884	486.089	0.57005	0.174927	3.25879	0.0011189	0.00330345	AAMDC
ENSG00000087903	385.844	-0.651542	0.164955	-3.94981	7.82142e-05	0.000337365	RFX2
ENSG00000087995	447.675	0.141297	0.163552	0.863932	0.387626	0.477887	METTL2A
ENSG00000088002	162.694	-1.42229	0.364333	-3.90383	9.46836e-05	0.000396937	SULT2B1
ENSG00000088035	183.459	-0.317955	0.20941	-1.51834	0.128928	0.192258	ALG6
ENSG00000088038	181.788	0.637401	0.24597	2.59138	0.0095592	0.0210963	CNOT3
ENSG00000088053	4.70922	-1.03004	1.07088	-0.961864	0.336118	0.425827	GP6
ENSG00000088179	447.501	-0.637038	0.170277	-3.74119	0.000183151	0.00070119	PTPN4
ENSG00000088205	816.102	0.68698	0.181499	3.78504	0.000153682	0.00060095	DDX18
ENSG00000088247	907.913	0.520822	0.263343	1.97773	0.0479592	0.0833292	KHSRP
ENSG00000088256	627.538	0.390235	0.20291	1.92319	0.054456	0.0928273	GNA11
ENSG00000088280	289.981	-0.674594	0.169921	-3.97004	7.186e-05	0.000313099	ASAP3
ENSG00000088298	247.474	0.856211	0.18945	4.51945	6.20019e-06	3.93594e-05	EDEM2
ENSG00000088305	285.77	-0.485929	0.231959	-2.09489	0.0361808	0.0654658	DNMT3B
ENSG00000088320	14.1656	-1.92558	0.674778	-2.85365	0.00432199	0.0106182	REM1
ENSG00000088325	1235.44	-0.443114	0.138062	-3.20954	0.00132949	0.00383023	TPX2
ENSG00000088356	1234.37	0.727533	0.203537	3.57445	0.00035096	0.0012226	PDRG1
ENSG00000088367	659.983	0.254436	0.157774	1.61266	0.106819	0.163808	EPB41L1
ENSG00000088386	85.8233	-1.74422	0.364381	-4.78679	1.69469e-06	1.31428e-05	SLC15A1
ENSG00000088387	294.02	-0.631888	0.210219	-3.00586	0.0026483	0.0069615	DOCK9
ENSG00000088448	754.092	0.225555	0.148988	1.51391	0.130048	0.193698	ANKRD10
ENSG00000088451	72.4623	-0.351986	0.358554	-0.981682	0.326257	0.415665	TGDS
ENSG00000088538	1044.66	-1.02452	0.148164	-6.91482	4.68462e-12	2.39951e-10	DOCK3
ENSG00000088543	108.29	0.754105	0.291934	2.58314	0.00979066	0.0215021	C3orf18
ENSG00000088682	546.783	0.884446	0.181308	4.87815	1.07085e-06	8.86546e-06	COQ9
ENSG00000088726	63.8517	-1.62581	0.399563	-4.06896	4.7223e-05	0.000219775	TMEM40
ENSG00000088727	138.284	-0.132873	0.265896	-0.499716	0.617275	0.693073	KIF9
ENSG00000088756	222.262	-1.35795	0.279974	-4.85029	1.23281e-06	1.00102e-05	ARHGAP28
ENSG00000088766	218.635	-0.167182	0.200163	-0.835227	0.40359	0.493529	CRLS1
ENSG00000088808	415.473	-0.877065	0.176733	-4.96266	6.95351e-07	6.17544e-06	PPP1R13B
ENSG00000088812	450.387	-0.432528	0.169907	-2.54567	0.0109068	0.0236091	ATRN
ENSG00000088826	374.957	0.793352	0.199166	3.98337	6.79451e-05	0.000298106	SMOX
ENSG00000088827	11.6178	-1.93888	0.873184	-2.22047	0.0263869	0.0500687	SIGLEC1
ENSG00000088832	1174.37	0.974444	0.193605	5.03314	4.82505e-07	4.49114e-06	FKBP1A
ENSG00000088833	1437.89	1.1693	0.16887	6.92427	4.38244e-12	2.25786e-10	NSFL1C
ENSG00000088836	5.91075	-0.457299	0.976518	-0.468296	0.639573	0.712164	SLC4A11
ENSG00000088854	795.468	-0.344146	0.168722	-2.03973	0.0413777	0.0735325	C20orf194
ENSG00000088876	123.996	0.300709	0.239817	1.25391	0.209875	0.288838	ZNF343
ENSG00000088881	220.624	-0.248568	0.238747	-1.04114	0.297812	0.386638	EBF4
ENSG00000088882	224.108	0.588451	0.223867	2.62857	0.0085744	0.0192509	CPXM1
ENSG00000088888	593.102	0.231429	0.144088	1.60617	0.108237	0.165608	MAVS
ENSG00000088899	334.446	0.886542	0.217313	4.07956	4.51208e-05	0.000211612	LZTS3
ENSG00000088926	11.1992	-2.42051	0.847749	-2.85522	0.00430065	0.0105775	F11
ENSG00000088930	706.149	0.0143033	0.149682	0.095558	0.923872	0.942777	XRN2
ENSG00000088970	108.857	-0.0162206	0.244639	-0.0663043	0.947136	0.96096	KIZ
ENSG00000088986	3665.88	0.707764	0.1589	4.45414	8.42301e-06	5.09137e-05	DYNLL1
ENSG00000088992	92.2239	-0.514199	0.291157	-1.76605	0.0773869	0.124651	TESC
ENSG00000089006	453.721	0.823709	0.192982	4.26832	1.96952e-05	0.000104244	SNX5
ENSG00000089009	5604.85	0.577745	0.163122	3.5418	0.000397411	0.001356	RPL6
ENSG00000089022	587.971	0.0836447	0.173413	0.482344	0.629562	0.703506	MAPKAPK5
ENSG00000089041	131.309	-1.44679	0.314559	-4.59944	4.23635e-06	2.84577e-05	P2RX7
ENSG00000089048	412.469	-0.0454411	0.153973	-0.295123	0.7679	0.81913	ESF1
ENSG00000089050	135.559	0.796019	0.24541	3.24362	0.0011802	0.00345778	RBBP9
ENSG00000089053	866.47	0.0372329	0.144309	0.258008	0.796401	0.842494	ANAPC5
ENSG00000089057	648.477	-0.595213	0.150142	-3.96434	7.35994e-05	0.000319572	SLC23A2
ENSG00000089060	113.7	-0.912521	0.296981	-3.07266	0.00212163	0.00575213	SLC8B1
ENSG00000089063	540.879	-0.0778781	0.155241	-0.501658	0.615908	0.691626	TMEM230
ENSG00000089091	178.459	-0.526812	0.209748	-2.51164	0.0120171	0.0256252	DZANK1
ENSG00000089094	739.48	-0.610297	0.175432	-3.47882	0.000503635	0.00166013	KDM2B
ENSG00000089101	140.084	-1.41321	0.323167	-4.373	1.22548e-05	6.96325e-05	CFAP61
ENSG00000089116	290.765	2.89323	0.284023	10.1866	2.27647e-24	1.05556e-21	LHX5
ENSG00000089123	364.331	-0.738529	0.185247	-3.98673	6.69896e-05	0.000294647	TASP1
ENSG00000089154	268.055	-0.560111	0.185987	-3.01155	0.00259915	0.00684968	GCN1
ENSG00000089157	5951.39	0.676655	0.121759	5.55731	2.73961e-08	4.03274e-07	RPLP0
ENSG00000089159	309.22	0.197806	0.187289	1.05615	0.290899	0.379199	PXN
ENSG00000089163	137.546	0.191592	0.253796	0.754907	0.450305	0.53946	SIRT4
ENSG00000089169	272.94	-1.62552	0.240257	-6.76575	1.32623e-11	5.85669e-10	RPH3A
ENSG00000089177	215.963	-0.888556	0.25001	-3.55408	0.000379297	0.00130277	KIF16B
ENSG00000089195	436.997	0.946529	0.166716	5.6775	1.36676e-08	2.22367e-07	TRMT6
ENSG00000089199	503.536	0.889991	0.201379	4.41947	9.89422e-06	5.82869e-05	CHGB
ENSG00000089220	7077.8	0.903802	0.192418	4.69707	2.63924e-06	1.91688e-05	PEBP1
ENSG00000089225	38.7219	-1.96617	0.49654	-3.95973	7.50335e-05	0.000325238	TBX5
ENSG00000089234	441.837	0.0523592	0.156485	0.334596	0.73793	0.794763	BRAP
ENSG00000089248	2037.36	1.3429	0.123768	10.8501	1.99215e-27	1.52616e-24	ERP29
ENSG00000089250	229.689	-1.83995	0.341323	-5.39063	7.02096e-08	8.8617e-07	NOS1
ENSG00000089280	2999.72	0.32123	0.149597	2.14731	0.0317688	0.0585958	FUS
ENSG00000089289	773.925	0.586885	0.140025	4.1913	2.77363e-05	0.000139445	IGBP1
ENSG00000089327	43.9341	-0.0272209	1.22376	-0.0222437	0.982254	0.987296	FXYD5
ENSG00000089335	482.746	0.357302	0.210956	1.69373	0.0903161	0.14215	ZNF302
ENSG00000089351	382.767	0.728341	0.215531	3.37928	0.000726753	0.00228382	GRAMD1A
ENSG00000089356	5.58837	-1.16285	0.977648	-1.18944	0.234266	0.316687	FXYD3
ENSG00000089472	359.065	-0.62964	0.229298	-2.74594	0.00603377	0.0141905	HEPH
ENSG00000089486	594.427	0.727429	0.166855	4.35965	1.30271e-05	7.34052e-05	CDIP1
ENSG00000089505	2.13543	1.03763	1.58613	0.654186	0.512992		CMTM1
ENSG00000089558	55.4173	-1.10259	0.388748	-2.83627	0.00456445	0.0111424	KCNH4
ENSG00000089597	367.783	0.217432	0.177194	1.22709	0.219789	0.30012	GANAB
ENSG00000089639	183.044	0.857245	0.202678	4.2296	2.34111e-05	0.000120545	GMIP
ENSG00000089682	363.586	0.0729604	0.171544	0.425315	0.670607	0.738921	RBM41
ENSG00000089685	894.503	0.54497	0.171932	3.16968	0.00152605	0.00432507	BIRC5
ENSG00000089692	16.7833	0.89543	0.578532	1.54776	0.121679	0.183012	LAG3
ENSG00000089693	1990.21	0.972339	0.202535	4.80084	1.57999e-06	1.23676e-05	MLF2
ENSG00000089723	101.251	0.998165	0.290607	3.43475	0.000593092	0.00191187	OTUB2
ENSG00000089737	756.166	0.308041	0.149491	2.06059	0.0393417	0.0704114	DDX24
ENSG00000089775	196.026	-0.153847	0.200019	-0.76916	0.441798	0.531147	ZBTB25
ENSG00000089818	524.106	1.15252	0.171551	6.71826	1.8391e-11	7.66073e-10	NECAP1
ENSG00000089820	31.4314	-0.483775	0.440196	-1.099	0.271768	0.358318	ARHGAP4
ENSG00000089847	112.448	-1.12789	0.301595	-3.73975	0.000184202	0.000704056	ANKRD24
ENSG00000089876	277.471	0.460542	0.183833	2.50522	0.0122376	0.0260124	DHX32
ENSG00000089902	649.728	-0.631599	0.155453	-4.06297	4.84524e-05	0.000224489	RCOR1
ENSG00000089916	571.928	-0.105977	0.156122	-0.67881	0.497258	0.58384	GPATCH2L
ENSG00000090006	294.773	-0.240585	0.174997	-1.3748	0.169195	0.241139	LTBP4
ENSG00000090013	414.671	1.61191	0.229756	7.01575	2.2872e-12	1.29583e-10	BLVRB
ENSG00000090020	247.484	-0.231808	0.219303	-1.05702	0.290501	0.378878	SLC9A1
ENSG00000090054	434.159	-0.0961887	0.183744	-0.523493	0.600631	0.678095	SPTLC1
ENSG00000090060	1010.79	0.349703	0.149762	2.33506	0.0195402	0.0388292	PAPOLA
ENSG00000090061	79.9436	-0.0453415	0.397444	-0.114083	0.909172	0.931373	CCNK
ENSG00000090097	1174.8	1.30353	0.219219	5.94622	2.74398e-09	5.60893e-08	PCBP4
ENSG00000090104	3.73942	0.252071	1.76641	0.142702	0.886525	0.913217	RGS1
ENSG00000090238	298.992	1.04005	0.210923	4.93094	8.18332e-07	7.10296e-06	YPEL3
ENSG00000090263	451.724	0.546818	0.190764	2.86647	0.00415075	0.0102503	MRPS33
ENSG00000090266	3150.45	0.632827	0.182849	3.46094	0.000538302	0.00175907	NDUFB2
ENSG00000090273	2668.67	0.790951	0.126223	6.26628	3.69778e-10	1.02606e-08	NUDC
ENSG00000090316	672.263	0.695517	0.140646	4.94516	7.60801e-07	6.66203e-06	MAEA
ENSG00000090339	7.86736	-0.670016	0.786421	-0.851982	0.394224	0.484497	ICAM1
ENSG00000090372	556.235	0.592711	0.168582	3.51586	0.000438332	0.00147372	STRN4
ENSG00000090376	60.4104	-1.71019	0.366385	-4.66775	3.04517e-06	2.16093e-05	IRAK3
ENSG00000090382	5.57581	-1.91065	0.99929	-1.91201	0.0558746	0.0948287	LYZ
ENSG00000090402	38.6031	-1.81755	0.433574	-4.19201	2.76496e-05	0.000139159	SI
ENSG00000090432	345.196	1.06256	0.178879	5.9401	2.84854e-09	5.79575e-08	MUL1
ENSG00000090447	162.439	0.0482692	0.206055	0.234255	0.814787	0.856801	TFAP4
ENSG00000090470	276.868	0.281532	0.200673	1.40294	0.160634	0.230919	PDCD7
ENSG00000090487	635.854	1.06153	0.154391	6.87557	6.17444e-12	3.056e-10	SPG21
ENSG00000090512	4.42498	-0.179094	1.25139	-0.143116	0.886199	0.912987	FETUB
ENSG00000090520	885.892	1.08272	0.176906	6.12033	9.33841e-10	2.22355e-08	DNAJB11
ENSG00000090530	57.2994	-1.37517	0.516416	-2.66291	0.00774691	0.0176289	P3H2
ENSG00000090534	5.08658	-1.04991	1.01565	-1.03373	0.301264	0.390257	THPO
ENSG00000090539	21.3848	-0.359279	0.501952	-0.715764	0.474137	0.56103	CHRD
ENSG00000090565	620.707	-0.323294	0.172582	-1.87328	0.0610299	0.101938	RAB11FIP3
ENSG00000090581	419.668	0.988251	0.171374	5.76663	8.08724e-09	1.41086e-07	GNPTG
ENSG00000090612	350.023	0.0371667	0.171566	0.216632	0.828495	0.867694	ZNF268
ENSG00000090615	402.737	0.057663	0.164556	0.350416	0.726027	0.785014	GOLGA3
ENSG00000090621	576.194	0.268957	0.191341	1.40564	0.15983	0.229913	PABPC4
ENSG00000090659	13.1717	0.255209	0.684096	0.37306	0.709104	0.77107	CD209
ENSG00000090661	515.096	0.462244	0.178697	2.58675	0.00968864	0.0213235	CERS4
ENSG00000090674	312.802	1.53365	0.189811	8.07989	6.48263e-16	7.87752e-14	MCOLN1
ENSG00000090686	901.724	-0.0576315	0.142824	-0.403515	0.686569	0.75219	USP48
ENSG00000090776	714.51	0.209805	0.236431	0.887384	0.374872	0.465232	EFNB1
ENSG00000090857	411.908	-0.893157	0.187421	-4.76551	1.88379e-06	1.44315e-05	PDPR
ENSG00000090861	499.496	0.356312	0.16343	2.18021	0.0292419	0.0545808	AARS
ENSG00000090863	1229.45	-0.244263	0.13268	-1.84099	0.0656229	0.108578	GLG1
ENSG00000090889	266.456	-0.842768	0.174646	-4.82557	1.39605e-06	1.11104e-05	KIF4A
ENSG00000090905	1683.22	0.0457336	0.148317	0.308351	0.757815	0.810926	TNRC6A
ENSG00000090924	278.999	0.371479	0.199548	1.8616	0.0626588	0.104283	PLEKHG2
ENSG00000090932	521.12	0.777992	0.190709	4.07946	4.51396e-05	0.000211644	DLL3
ENSG00000090971	495.666	1.06477	0.20392	5.22153	1.77451e-07	1.92649e-06	NAT14
ENSG00000090975	185.803	-0.84757	0.234971	-3.60712	0.000309609	0.00109942	PITPNM2
ENSG00000090989	237.521	0.0312225	0.197044	0.158454	0.874099	0.903586	EXOC1
ENSG00000091009	116.223	-0.239712	0.273948	-0.875027	0.381559	0.471993	RBM27
ENSG00000091039	886.301	-0.199589	0.151019	-1.32161	0.186298	0.261309	OSBPL8
ENSG00000091073	167.392	-0.386131	0.216601	-1.78268	0.074638	0.120809	DTX2
ENSG00000091106	90.9676	-1.09327	0.313241	-3.49018	0.000482698	0.00160052	NLRC4
ENSG00000091127	311.937	-0.730735	0.210104	-3.47797	0.000505224	0.00166456	PUS7
ENSG00000091128	123.81	-1.81778	0.381141	-4.76932	1.84848e-06	1.42042e-05	LAMB4
ENSG00000091129	660.305	0.194049	0.156743	1.23801	0.215714	0.29565	NRCAM
ENSG00000091136	120.217	-0.73032	0.334553	-2.18297	0.0290378	0.0542867	LAMB1
ENSG00000091137	49.1671	-1.90021	0.460051	-4.13043	3.62079e-05	0.000175078	SLC26A4
ENSG00000091138	66.2085	-1.85288	0.366751	-5.05216	4.36852e-07	4.10305e-06	SLC26A3
ENSG00000091140	709.842	0.750092	0.168076	4.4628	8.08946e-06	4.92353e-05	DLD
ENSG00000091157	404.918	-0.708347	0.182467	-3.88205	0.000103579	0.000428217	WDR7
ENSG00000091164	1771.82	0.614921	0.164372	3.74103	0.000183267	0.000701384	TXNL1
ENSG00000091181	64.0784	-1.82494	0.332224	-5.49309	3.9495e-08	5.47523e-07	IL5RA
ENSG00000091262	150.51	-0.850267	0.274089	-3.10216	0.00192114	0.00528417	ABCC6
ENSG00000091317	372.764	0.715362	0.175272	4.08145	4.47552e-05	0.000210076	CMTM6
ENSG00000091409	235.653	-0.13477	0.197039	-0.683975	0.493991	0.580507	ITGA6
ENSG00000091428	231.766	-1.2782	0.218018	-5.86281	4.5509e-09	8.56217e-08	RAPGEF4
ENSG00000091436	381.315	-0.26704	0.169877	-1.57196	0.11596	0.175524	MAP3K20
ENSG00000091482	8.62376	-2.89912	0.96812	-2.99459	0.00274813	0.00718322	SMPX
ENSG00000091483	660.146	0.728788	0.20367	3.57828	0.00034586	0.0012077	FH
ENSG00000091490	202.022	-0.803746	0.274111	-2.9322	0.00336574	0.00855269	SEL1L3
ENSG00000091513	45.783	-1.66739	0.426434	-3.91008	9.22643e-05	0.00038883	TF
ENSG00000091527	666.889	0.0630039	0.193262	0.326002	0.744423	0.800337	CDV3
ENSG00000091536	63.0031	-0.911092	0.32138	-2.83493	0.0045835	0.0111765	MYO15A
ENSG00000091542	420.015	0.475927	0.188385	2.52635	0.0115256	0.0247177	ALKBH5
ENSG00000091583	81.2182	-1.63785	0.417787	-3.92029	8.84429e-05	0.000374967	APOH
ENSG00000091592	1334.95	1.034	0.229216	4.51103	6.45146e-06	4.07145e-05	NLRP1
ENSG00000091622	112.377	-0.857625	0.278498	-3.07946	0.00207375	0.00563794	PITPNM3
ENSG00000091640	1388.99	0.929984	0.178511	5.20967	1.89178e-07	2.02264e-06	SPAG7
ENSG00000091651	445.492	0.165945	0.186562	0.889489	0.37374	0.464048	ORC6
ENSG00000091656	1120.5	-0.651359	0.188376	-3.45777	0.000544665	0.00177525	ZFHX4
ENSG00000091664	277.84	2.38024	0.219823	10.828	2.53683e-27	1.86245e-24	SLC17A6
ENSG00000091704	9.14961	0.0979444	0.774021	0.12654	0.899305	0.923294	CPA1
ENSG00000091732	415.568	0.429935	0.157652	2.72712	0.00638903	0.0148967	ZC3HC1
ENSG00000091831	197.415	-2.00279	0.351032	-5.70542	1.16059e-08	1.93102e-07	ESR1
ENSG00000091844	354.765	0.21622	0.183608	1.17762	0.238948	0.321582	RGS17
ENSG00000091879	44.7109	-0.614829	0.443239	-1.38713	0.165403	0.236616	ANGPT2
ENSG00000091947	333.322	0.917854	0.174337	5.26484	1.40312e-07	1.57874e-06	TMEM101
ENSG00000091972	1268.76	0.884272	0.1496	5.91091	3.40219e-09	6.73556e-08	CD200
ENSG00000091986	74.8453	-0.446601	0.426078	-1.04817	0.294562	0.383266	CCDC80
ENSG00000092010	1413.44	0.909227	0.201893	4.50352	6.68384e-06	4.19406e-05	PSME1
ENSG00000092020	430.686	0.639101	0.182876	3.49473	0.00047455	0.00157825	PPP2R3C
ENSG00000092036	184.193	0.336338	0.227958	1.47544	0.140095	0.206204	HAUS4
ENSG00000092051	445.709	0.535819	0.211469	2.5338	0.0112833	0.0242986	JPH4
ENSG00000092054	55.4818	0.712105	0.362242	1.96583	0.0493188	0.0853297	MYH7
ENSG00000092068	131.14	0.0720273	0.331159	0.217501	0.827818	0.867243	SLC7A8
ENSG00000092094	445.424	0.900207	0.175208	5.13793	2.77778e-07	2.79205e-06	OSGEP
ENSG00000092096	1043.32	1.00291	0.168927	5.93694	2.90385e-09	5.8879e-08	SLC22A17
ENSG00000092098	31.6063	1.0464	0.476826	2.19452	0.0281984	0.0528907	RNF31
ENSG00000092108	492.449	-0.0601268	0.164814	-0.364815	0.715249	0.776267	SCFD1
ENSG00000092140	274.476	-0.398982	0.192322	-2.07455	0.0380283	0.0682968	G2E3
ENSG00000092148	515.743	-0.621015	0.150754	-4.1194	3.79864e-05	0.000182376	HECTD1
ENSG00000092199	6207.28	0.437033	0.134149	3.25782	0.00112273	0.00331198	HNRNPC
ENSG00000092200	183.71	-1.74344	0.328283	-5.31079	1.09149e-07	1.28043e-06	RPGRIP1
ENSG00000092201	415.793	-0.515686	0.207887	-2.48061	0.0131157	0.0276038	SUPT16H
ENSG00000092203	646.225	0.579646	0.159752	3.62842	0.000285161	0.00102312	TOX4
ENSG00000092208	451.993	0.585218	0.183523	3.1888	0.00142866	0.00408256	GEMIN2
ENSG00000092295	3.96805	0.553006	1.2477	0.44322	0.657606	0.727782	TGM1
ENSG00000092330	580.724	0.927767	0.242225	3.83018	0.000128049	0.000513266	TINF2
ENSG00000092345	31.1872	-2.30937	0.60003	-3.84876	0.000118716	0.0004812	DAZL
ENSG00000092377	15.603	-1.35879	0.617035	-2.20212	0.0276568	0.0520634	TBL1Y
ENSG00000092421	589.941	1.26077	0.199447	6.32134	2.5931e-10	7.52724e-09	SEMA6A
ENSG00000092439	522.253	-0.523004	0.164596	-3.1775	0.0014855	0.00422785	TRPM7
ENSG00000092445	365.679	0.376057	0.164364	2.28796	0.0221399	0.0432921	TYRO3
ENSG00000092470	260.1	-0.578265	0.22384	-2.58339	0.00978354	0.0214918	WDR76
ENSG00000092529	22.4739	2.69278	0.632129	4.25986	2.04557e-05	0.000107559	CAPN3
ENSG00000092531	127.304	0.350906	0.314237	1.11669	0.264127	0.349971	SNAP23
ENSG00000092607	22.6228	-2.26106	0.572019	-3.95277	7.72509e-05	0.000333781	TBX15
ENSG00000092621	1075.79	0.595109	0.146032	4.07521	4.59733e-05	0.000214696	PHGDH
ENSG00000092758	48.8314	-0.850358	0.479996	-1.77159	0.076462	0.123319	COL9A3
ENSG00000092820	709.958	0.184229	0.185019	0.99573	0.319381	0.408411	EZR
ENSG00000092841	8411.93	1.12446	0.166635	6.74802	1.49872e-11	6.48833e-10	MYL6
ENSG00000092847	888.943	0.110754	0.166015	0.667129	0.50469	0.591305	AGO1
ENSG00000092850	91.2535	1.24295	0.273804	4.53955	5.63738e-06	3.63051e-05	TEKT2
ENSG00000092853	405.171	-0.299333	0.210271	-1.42356	0.154574	0.223446	CLSPN
ENSG00000092871	106.702	0.233961	0.289527	0.808081	0.419044	0.508615	RFFL
ENSG00000092929	26.7197	-0.250981	0.466961	-0.537478	0.590937	0.669642	UNC13D
ENSG00000092931	391.964	0.0313173	0.160864	0.194682	0.845642	0.880939	MFSD11
ENSG00000092964	3754.21	0.173559	0.15392	1.1276	0.25949	0.344812	DPYSL2
ENSG00000092969	149.883	-0.346973	0.262239	-1.32311	0.185797	0.260815	TGFB2
ENSG00000092978	463.771	-0.10968	0.1672	-0.655983	0.511835	0.597769	GPATCH2
ENSG00000093000	415.555	0.150688	0.179264	0.840595	0.400575	0.490216	NUP50
ENSG00000093009	246.494	0.0526996	0.214417	0.24578	0.805852	0.84989	CDC45
ENSG00000093010	437.605	-0.224504	0.185307	-1.21152	0.225695	0.306683	COMT
ENSG00000093072	363.353	-0.263106	0.205748	-1.27878	0.200975	0.278504	ADA2
ENSG00000093144	920.18	0.798661	0.177437	4.5011	6.76037e-06	4.23756e-05	ECHDC1
ENSG00000093167	758.82	-0.00142033	0.151265	-0.00938966	0.992508	0.99488	LRRFIP2
ENSG00000093183	309.703	0.167324	0.170298	0.982535	0.325836	0.415267	SEC22C
ENSG00000093217	114.584	-0.617275	0.237294	-2.60131	0.00928694	0.020578	XYLB
ENSG00000094631	347.567	1.01538	0.200856	5.05527	4.29786e-07	4.04748e-06	HDAC6
ENSG00000094661	21.3034	-1.64148	0.582878	-2.81615	0.00486024	0.01178	OR1I1
ENSG00000094755	20.4705	-0.156641	0.821013	-0.19079	0.84869	0.883279	GABRP
ENSG00000094804	232.11	0.0133824	0.196096	0.0682444	0.945591	0.960068	CDC6
ENSG00000094841	209.06	1.09427	0.224337	4.87778	1.07285e-06	8.87494e-06	UPRT
ENSG00000094880	295.296	0.248952	0.194446	1.28031	0.200434	0.277864	CDC23
ENSG00000094914	455.1	0.672741	0.151007	4.45504	8.38783e-06	5.07533e-05	AAAS
ENSG00000094916	4338.95	0.420822	0.171972	2.44704	0.0144036	0.0299015	CBX5
ENSG00000094963	22.2169	-1.53536	0.569131	-2.69773	0.00698146	0.0161007	FMO2
ENSG00000094975	475.08	0.113103	0.16428	0.688478	0.491152	0.577826	SUCO
ENSG00000095002	557.637	-0.763814	0.16241	-4.70299	2.56381e-06	1.87135e-05	MSH2
ENSG00000095015	122.864	-0.83887	0.270248	-3.10407	0.00190877	0.00525754	MAP3K1
ENSG00000095059	1378.91	0.875139	0.224421	3.89955	9.6373e-05	0.000402392	DHPS
ENSG00000095066	377.383	0.185473	0.174456	1.06315	0.287714	0.37591	HOOK2
ENSG00000095110	12.8269	-2.11668	0.688871	-3.07268	0.00212148	0.00575213	NXPE1
ENSG00000095139	490.797	0.0714903	0.192742	0.370912	0.710703	0.772379	ARCN1
ENSG00000095203	214.335	-0.834989	0.249805	-3.34256	0.00083009	0.00255881	EPB41L4B
ENSG00000095209	236.593	0.636233	0.205321	3.09872	0.00194361	0.005336	TMEM38B
ENSG00000095261	154.408	0.488135	0.244215	1.99879	0.045631	0.0798826	PSMD5
ENSG00000095303	15.0326	-2.02869	0.768997	-2.6381	0.00833714	0.0187828	PTGS1
ENSG00000095319	287.516	-0.491035	0.196814	-2.49491	0.0125988	0.0266751	NUP188
ENSG00000095321	288.161	1.27839	0.186943	6.83838	8.00915e-12	3.84527e-10	CRAT
ENSG00000095370	253.022	0.489058	0.213865	2.28676	0.0222099	0.0434048	SH2D3C
ENSG00000095380	825.712	1.36988	0.163444	8.38139	5.23055e-17	8.15596e-15	NANS
ENSG00000095383	89.5184	0.00343807	0.309095	0.011123	0.991125	0.993946	TBC1D2
ENSG00000095397	108.485	0.0701479	0.261731	0.268015	0.788688	0.835991	WHRN
ENSG00000095464	35.8033	-1.26653	0.460857	-2.74821	0.00599212	0.0141057	PDE6C
ENSG00000095485	221.981	-0.197225	0.196682	-1.00276	0.315978	0.405246	CWF19L1
ENSG00000095539	41.6651	1.95702	0.417497	4.6875	2.76565e-06	1.98901e-05	SEMA4G
ENSG00000095564	304.194	-0.513578	0.18211	-2.82016	0.00479999	0.0116512	BTAF1
ENSG00000095574	49.451	-0.305382	0.365491	-0.835537	0.403415	0.493384	IKZF5
ENSG00000095585	40.8567	-1.88731	0.536541	-3.51755	0.000435555	0.00146655	BLNK
ENSG00000095587	145.666	-0.83674	0.237112	-3.52888	0.000417325	0.0014144	TLL2
ENSG00000095596	34.0974	0.0141347	1.3333	0.0106013	0.991542	0.994137	CYP26A1
ENSG00000095627	64.1467	-2.20173	0.378015	-5.82445	5.73006e-09	1.03872e-07	TDRD1
ENSG00000095637	683.953	-0.6045	0.169418	-3.56809	0.00035959	0.00124528	SORBS1
ENSG00000095713	151.627	-0.180807	0.283394	-0.638005	0.523471	0.608695	CRTAC1
ENSG00000095739	153.674	-0.00107762	1.23714	-0.000871055	0.999305	0.999577	BAMBI
ENSG00000095752	11.0292	-0.556603	0.679922	-0.818629	0.412998	0.502731	IL11
ENSG00000095777	196.877	-1.56274	0.245408	-6.36794	1.91584e-10	5.8002e-09	MYO3A
ENSG00000095787	1230.01	0.0271026	0.147874	0.183282	0.854577	0.887781	WAC
ENSG00000095794	390.931	-0.254524	0.161048	-1.58043	0.11401	0.173057	CREM
ENSG00000095906	932.73	0.71516	0.200302	3.57041	0.000356422	0.00123689	NUBP2
ENSG00000095932	18.7536	1.15806	0.555402	2.08509	0.0370613	0.0667983	SMIM24
ENSG00000095951	205.902	-0.674956	0.201323	-3.3526	0.000800571	0.0024791	HIVEP1
ENSG00000096006	7.84864	-2.67963	1.05207	-2.54701	0.010865	0.0235331	CRISP3
ENSG00000096060	308.07	-0.708516	0.210073	-3.37272	0.000744304	0.00232984	FKBP5
ENSG00000096063	744.044	-0.13653	0.150738	-0.905743	0.365072	0.454942	SRPK1
ENSG00000096070	219.668	-0.0311143	0.20808	-0.149531	0.881135	0.909153	BRPF3
ENSG00000096080	586.54	1.20009	0.186662	6.42924	1.2824e-10	4.1613e-09	MRPS18A
ENSG00000096088	16.4214	-1.65776	0.688043	-2.40939	0.0159793	0.0327086	PGC
ENSG00000096092	755.126	0.964119	0.219861	4.38513	1.15915e-05	6.65282e-05	TMEM14A
ENSG00000096093	197.45	-0.0729253	0.1953	-0.373402	0.708849	0.77084	EFHC1
ENSG00000096384	2437.19	0.157621	0.13993	1.12643	0.259983	0.345364	HSP90AB1
ENSG00000096395	12.9298	0.35514	0.648665	0.547494	0.584039	0.663536	MLN
[truncated: 16,333 more rows]

## Sheet: DEG clusters_Highpoly
	row	gene_id	TSC2_HighPolysome.196463	TSC2_HighPolysome.196455	TSC2_HighPolysome.196447	WT_HighPolysome.196459	WT_HighPolysome.196451	WT_HighPolysome.196443	ct	rank	cluster
1	1	ENSG00000167916|KRT24	-1.16434	1.38673	1.07313	-0.349796	-0.46555	-0.480186	1	1	1
2	2	ENSG00000158710|TAGLN2	-0.265441	0.152996	1.76748	-0.741358	-1.09525	0.181577	1	2	1
3	3	ENSG00000071282|LMCD1	-0.209157	0.0731845	1.77508	-0.656751	-1.15682	0.174457	1	3	1
4	4	ENSG00000243989|ACY1	-0.175889	0.136536	1.75976	-0.681656	-1.17111	0.132367	1	4	1
5	5	ENSG00000176014|TUBB6	-0.162993	0.239963	1.52726	-0.760501	-1.32989	0.486157	1	5	1
6	6	ENSG00000244187|TMEM141	-0.188706	0.373819	1.55002	-0.892427	-1.21841	0.375701	1	6	1
7	7	ENSG00000120913|PDLIM2	-0.212791	0.505085	1.57947	-0.550054	-1.37809	0.0563822	1	7	1
8	8	ENSG00000099860|GADD45B	0.0211464	0.303695	1.51877	-0.731908	-1.40644	0.294738	1	8	1
9	9	ENSG00000147255|IGSF1	0.163838	0.422421	1.44636	-0.786015	-1.43199	0.185387	1	9	1
10	10	ENSG00000170498|KISS1	-0.378541	-0.155245	1.89308	-0.347514	-1.06098	0.0492027	1	10	1
11	11	ENSG00000172889|EGFL7	-0.505287	0.0758418	1.97306	-0.383287	-0.693895	-0.466434	1	11	1
12	12	ENSG00000102265|TIMP1	-0.413825	0.0486592	1.95612	-0.606062	-0.764162	-0.220731	1	12	1
13	13	ENSG00000164120|HPGD	-0.494505	0.0906914	1.93844	-0.517778	-0.828263	-0.188588	1	13	1
14	14	ENSG00000181284|TMEM102	0.149075	0.766269	1.53843	-0.910657	-0.815934	-0.727184	1	14	1
15	15	ENSG00000185909|KLHDC8B	0.210863	0.789857	1.4978	-0.81999	-0.899074	-0.779454	1	15	1
16	16	ENSG00000179256|SMCO3	-0.15649	0.837904	1.59543	-0.75895	-0.75895	-0.75895	1	16	1
17	17	ENSG00000268606|MAGEA2	-0.0464265	0.727605	1.61687	-0.516739	-0.907988	-0.873325	1	17	1
18	18	ENSG00000162576|MXRA8	-0.294847	1.2619	1.24287	-0.621815	-1.04727	-0.540841	1	18	1
19	19	ENSG00000077942|FBLN1	-0.107436	1.1831	1.255	-0.844932	-1.05601	-0.429714	1	19	1
20	20	ENSG00000169692|AGPAT2	-0.20305	1.07379	1.32725	-0.696099	-1.21558	-0.286309	1	20	1
21	21	ENSG00000188603|CLN3	0.0394808	1.02664	1.34408	-0.524175	-1.14868	-0.73735	1	21	1
22	22	ENSG00000126522|ASL	0.265198	0.911963	1.32972	-0.561821	-1.2201	-0.724961	1	22	1
23	23	ENSG00000137522|RNF121	0.269839	1.0182	1.24754	-0.525075	-1.1419	-0.868602	1	23	1
24	24	ENSG00000198715|GLMP	0.198052	0.923642	1.37739	-0.870677	-1.06571	-0.562701	1	24	1
25	25	ENSG00000165548|TMEM63C	0.246207	0.961082	1.31824	-0.773364	-1.14516	-0.607012	1	25	1
26	26	ENSG00000214063|TSPAN4	0.257669	1.02137	1.24576	-0.786805	-1.19235	-0.54565	1	26	1
27	27	ENSG00000174791|RIN1	0.0543017	1.14948	1.17844	-0.640576	-1.29509	-0.446565	1	27	1
28	28	ENSG00000183386|FHL3	0.077304	1.19311	1.19766	-0.728995	-1.08457	-0.654518	1	28	1
29	29	ENSG00000162998|FRZB	-0.520175	0.671402	1.74487	-0.657797	-0.750842	-0.487456	1	29	1
30	30	ENSG00000159674|SPON2	-0.216699	0.601513	1.73442	-0.804101	-0.846829	-0.468304	1	30	1
31	31	ENSG00000196839|ADA	-0.318593	0.487672	1.80534	-0.553543	-0.917303	-0.503569	1	31	1
32	32	ENSG00000105825|TFPI2	-0.479482	0.299643	1.87301	-0.819429	-0.680763	-0.192979	1	32	1
33	33	ENSG00000235169|SMIM1	-0.496948	0.520667	1.7544	-0.642611	-0.983919	-0.151589	1	33	1
34	34	ENSG00000128016|ZFP36	-0.384134	0.279554	1.90744	-0.753274	-0.430648	-0.618937	1	34	1
35	35	ENSG00000102871|TRADD	-0.05545	0.176397	1.89389	-0.670082	-0.785969	-0.558785	1	35	1
36	36	ENSG00000127920|GNG11	-0.034993	0.575516	1.71967	-0.778937	-0.797484	-0.683777	1	36	1
37	37	ENSG00000198832|SELENOM	-0.0289233	0.382198	1.80959	-0.628548	-0.823417	-0.710901	1	37	1
38	38	ENSG00000130429|ARPC1B	-0.608736	0.756751	1.59993	-0.90842	-0.819365	-0.0201592	1	38	1
39	39	ENSG00000133048|CHI3L1	-0.332832	0.901446	1.56879	-0.909617	-0.745034	-0.482749	1	39	1
40	40	ENSG00000189409|MMP23B	-0.42072	1.12079	1.40073	-0.932315	-0.746833	-0.421658	1	40	1
41	41	ENSG00000182612|TSPAN10	-0.529101	0.91673	1.5844	-0.455241	-0.681691	-0.835098	1	41	1
42	42	ENSG00000188257|PLA2G2A	-0.751187	0.44444	1.82815	-0.232478	-0.719828	-0.569095	1	42	1
43	43	ENSG00000076944|STXBP2	-0.947476	0.746721	1.63261	-0.508728	-0.773317	-0.149814	1	43	1
44	44	ENSG00000103811|CTSH	-0.75511	0.614083	1.6846	-0.325495	-1.03742	-0.18066	1	44	1
45	45	ENSG00000138385|SSB	0.865816	0.748597	0.572318	-1.69246	-0.680645	0.18637	1	45	1
46	46	ENSG00000189184|PCDH18	0.82972	0.395836	0.771185	-1.67048	-0.761633	0.435376	1	46	1
47	47	ENSG00000164484|TMEM200A	0.52232	0.481994	1.09065	-1.46457	-1.00862	0.378227	1	47	1
48	48	ENSG00000178538|CA8	0.47165	0.404187	1.2163	-1.5819	-0.756231	0.245994	1	48	1
49	49	ENSG00000142192|APP	0.23962	0.775617	1.16023	-1.51491	-0.821067	0.160509	1	49	1
50	50	ENSG00000146242|TPBG	0.333441	0.785567	0.905044	-1.68704	-0.692769	0.355758	1	50	1
51	51	ENSG00000184640|SEPT9	0.555479	1.28482	0.32365	-1.19514	-1.20492	0.236105	1	51	1
52	52	ENSG00000187634|SAMD11	0.721248	1.23894	0.21457	-1.29546	-1.0854	0.206102	1	52	1
53	53	ENSG00000203952|CCDC160	0.797309	0.870871	0.394173	-1.37297	-1.15951	0.470122	1	53	1
54	54	ENSG00000106263|EIF3B	0.649134	1.08495	0.41028	-1.53448	-0.893408	0.283521	1	54	1
55	55	ENSG00000167641|PPP1R14A	0.873893	0.965135	0.415219	-1.48407	-0.947835	0.177658	1	55	1
56	56	ENSG00000072110|ACTN1	0.245663	1.27857	0.37592	-1.19068	-1.21909	0.509613	1	56	1
57	57	ENSG00000150093|ITGB1	0.201898	1.05754	0.65186	-1.66009	-0.686165	0.434963	1	57	1
58	58	ENSG00000143320|CRABP2	0.691877	0.926988	0.714048	-1.14684	-1.34587	0.159794	1	58	1
59	59	ENSG00000164961|WASHC5	0.795395	0.958311	0.736665	-1.06494	-1.32765	-0.0977821	1	59	1
60	60	ENSG00000136160|EDNRB	0.503407	1.0096	0.884055	-1.3305	-1.08407	0.0175005	1	60	1
61	61	ENSG00000184185|KCNJ12	0.478273	1.09859	0.830466	-1.09898	-1.29098	-0.0173705	1	61	1
62	62	ENSG00000160446|ZDHHC12	0.732554	1.01718	0.865703	-1.026	-1.221	-0.368437	1	62	1
63	63	ENSG00000177468|OLIG3	0.686465	1.02142	0.848613	-0.993893	-1.30886	-0.253749	1	63	1
64	64	ENSG00000129187|DCTD	0.917607	0.796128	0.923953	-1.05974	-1.17787	-0.400078	1	64	1
65	65	ENSG00000100867|DHRS2	0.708914	0.802349	1.0766	-1.12228	-1.15772	-0.307866	1	65	1
66	66	ENSG00000151065|DCP1B	0.763343	0.862408	0.990815	-1.04424	-1.21354	-0.358785	1	66	1
67	67	ENSG00000117318|ID3	0.71584	0.76109	0.959201	-1.19898	-1.24524	0.00809203	1	67	1
68	68	ENSG00000124333|VAMP7	0.724928	0.755726	0.964915	-1.15628	-1.27875	-0.0105397	1	68	1
69	69	ENSG00000155660|PDIA4	0.736379	0.735099	1.04637	-1.11405	-1.24782	-0.155991	1	69	1
70	70	ENSG00000198727|MT-CYB	0.756544	0.792543	0.948808	-1.13933	-1.26167	-0.0968907	1	70	1
71	71	ENSG00000167004|PDIA3	0.695096	0.775227	1.00669	-1.398	-0.967237	-0.111771	1	71	1
72	72	ENSG00000175040|CHST2	0.778323	0.806084	0.927105	-1.38982	-0.96347	-0.158219	1	72	1
73	73	ENSG00000156925|ZIC3	0.735988	0.926404	0.837866	-1.26448	-1.13538	-0.100399	1	73	1
74	74	ENSG00000166426|CRABP1	0.822624	0.9353	0.771177	-1.31846	-1.04271	-0.167928	1	74	1
75	75	ENSG00000110092|CCND1	0.630638	1.09735	0.706721	-1.49794	-0.797074	-0.139705	1	75	1
76	76	ENSG00000133104|SPART	0.90316	0.897408	0.650809	-1.53141	-0.765775	-0.15419	1	76	1
77	77	ENSG00000044574|HSPA5	0.974295	0.596608	0.937673	-1.38941	-0.919345	-0.199824	1	77	1
78	78	ENSG00000181789|COPG1	0.987887	0.583648	0.888949	-1.37941	-0.99113	-0.0899429	1	78	1
79	79	ENSG00000170915|PAQR8	0.875981	0.786331	0.876042	-1.46223	-0.792771	-0.283351	1	79	1
80	80	ENSG00000073578|SDHA	0.966527	0.721297	0.905649	-1.3871	-0.795083	-0.411293	1	80	1
81	81	ENSG00000215251|FASTKD5	0.859211	0.701354	1.01846	-1.3908	-0.808986	-0.379241	1	81	1
82	82	ENSG00000170854|RIOX2	0.702948	0.372832	1.36039	-1.37796	-0.698711	-0.359503	1	82	1
83	83	ENSG00000141101|NOB1	0.599842	0.415544	1.44584	-1.2339	-0.838831	-0.388495	1	83	1
84	84	ENSG00000143153|ATP1B1	0.699378	0.259146	1.461	-1.16599	-0.913127	-0.340402	1	84	1
85	85	ENSG00000153714|LURAP1L	0.863517	0.490596	1.16676	-1.23517	-1.03025	-0.255453	1	85	1
86	86	ENSG00000128272|ATF4	0.756524	0.507417	1.21677	-1.20221	-1.10134	-0.17716	1	86	1
87	87	ENSG00000128595|CALU	0.825604	0.563534	1.1072	-1.23187	-1.11076	-0.153708	1	87	1
88	88	ENSG00000065911|MTHFD2	0.613644	0.646928	1.23398	-1.34898	-0.893943	-0.25163	1	88	1
89	89	ENSG00000072756|TRNT1	0.747516	0.573741	1.1709	-1.39525	-0.858857	-0.238049	1	89	1
90	90	ENSG00000169218|RSPO1	0.751794	0.6512	1.11644	-1.36651	-0.917298	-0.23563	1	90	1
91	91	ENSG00000145216|FIP1L1	0.68952	0.465359	1.1848	-1.54631	-0.711689	-0.0816753	1	91	1
92	92	ENSG00000157224|CLDN12	0.861321	0.257784	1.2062	-1.47662	-0.737571	-0.111116	1	92	1
93	93	ENSG00000064102|INTS13	0.953208	0.359249	1.09629	-1.34031	-0.977648	-0.0907899	1	93	1
94	94	ENSG00000197872|FAM49A	0.954111	0.201182	1.25396	-1.24828	-0.930229	-0.230748	1	94	1
95	95	ENSG00000137880|GCHFR	0.802868	0.550227	1.11663	-1.06958	-1.28384	-0.116296	1	95	1
96	96	ENSG00000181019|NQO1	0.779075	0.400451	1.22401	-1.03507	-1.28704	-0.0814267	1	96	1
97	97	ENSG00000122694|GLIPR2	0.892751	0.545837	1.16404	-1.07822	-1.09807	-0.426331	1	97	1
98	98	ENSG00000156709|AIFM1	0.882313	0.452978	1.26455	-0.962982	-1.09253	-0.544329	1	98	1
99	99	ENSG00000164111|ANXA5	0.868447	0.355386	1.28324	-1.10352	-1.06924	-0.334315	1	99	1
100	100	ENSG00000198786|MT-ND5	0.81217	0.487156	1.2767	-1.10056	-1.03215	-0.443324	1	100	1
101	101	ENSG00000239282|CASTOR1	0.783505	0.522592	1.27072	-1.17646	-0.958772	-0.441587	1	101	1
102	102	ENSG00000174405|LIG4	1.14479	0.39601	0.915071	-1.28134	-1.0137	-0.160825	1	102	1
103	103	ENSG00000174740|PABPC5	1.17648	0.323493	0.927559	-1.24103	-1.04428	-0.142223	1	103	1
104	104	ENSG00000123095|BHLHE41	1.19026	0.346733	0.967344	-1.10457	-1.10457	-0.295198	1	104	1
105	105	ENSG00000136026|CKAP4	1.25807	0.425185	0.831782	-1.15807	-1.05453	-0.302442	1	105	1
106	106	ENSG00000087842|PIR	1.16362	0.489024	0.945658	-1.18629	-0.938826	-0.473186	1	106	1
107	107	ENSG00000109929|SC5D	1.03981	0.483412	1.06744	-1.21898	-0.929774	-0.441911	1	107	1
108	108	ENSG00000011260|UTP18	1.15992	0.381632	1.03838	-1.03545	-1.0602	-0.484285	1	108	1
109	109	ENSG00000135821|GLUL	1.18057	0.38635	0.99756	-1.13535	-0.989929	-0.439196	1	109	1
110	110	ENSG00000176623|RMDN1	1.23374	0.32209	0.986365	-1.15457	-0.923414	-0.464209	1	110	1
111	111	ENSG00000114200|BCHE	1.00844	0.533519	0.958371	-0.915457	-1.37808	-0.206799	1	111	1
112	112	ENSG00000145349|CAMK2D	1.14243	0.380868	0.917798	-0.884165	-1.37583	-0.181097	1	112	1
113	113	ENSG00000136448|NMT1	0.974514	0.755054	0.801936	-1.13525	-1.23365	-0.162608	1	113	1
114	114	ENSG00000092621|PHGDH	1.05373	0.657071	0.883345	-1.09417	-1.17156	-0.32841	1	114	1
115	115	ENSG00000203965|EFCAB7	1.03884	0.567831	0.947888	-1.08421	-1.20604	-0.264314	1	115	1
116	116	ENSG00000119401|TRIM32	1.03322	1.01479	0.312822	-0.99452	-1.34736	-0.0189542	1	116	1
117	117	ENSG00000123689|G0S2	0.928716	0.994529	0.373472	-1.09366	-1.33948	0.136427	1	117	1
118	118	ENSG00000109501|WFS1	1.09468	0.815276	0.560324	-0.987145	-1.35342	-0.129713	1	118	1
119	119	ENSG00000172216|CEBPB	1.05982	0.84845	0.433639	-0.841875	-1.50337	0.00333364	1	119	1
120	120	ENSG00000273274|ZBTB8B	1.00648	0.927345	0.422168	-0.944398	-1.43402	0.0224171	1	120	1
121	121	ENSG00000008394|MGST1	0.933363	0.666816	0.382211	-0.986001	-1.51542	0.519035	1	121	1
122	122	ENSG00000198899|MT-ATP6	0.946831	0.460129	0.644063	-1.27984	-1.26355	0.492367	1	122	1
123	123	ENSG00000132383|RPA1	1.30945	0.478986	0.268261	-1.44712	-0.89808	0.288505	1	123	1
124	124	ENSG00000153885|KCTD15	1.06862	0.940888	0.136222	-1.4697	-0.869852	0.193825	1	124	1
125	125	ENSG00000163938|GNL3	1.20911	0.106243	0.592635	-1.56467	-0.749775	0.406455	1	125	1
126	126	ENSG00000164040|PGRMC2	1.28209	0.317397	0.610604	-1.49353	-0.802861	0.0863037	1	126	1
127	127	ENSG00000221823|PPP3R1	1.29486	0.196681	0.714323	-1.42841	-0.853399	0.0759431	1	127	1
128	128	ENSG00000113141|IK	1.35758	0.539394	0.415246	-1.35738	-0.921971	-0.0328734	1	128	1
129	129	ENSG00000089737|DDX24	1.39859	0.445438	0.486921	-1.43747	-0.71411	-0.179365	1	129	1
130	130	ENSG00000069329|VPS35	1.25974	0.511314	0.52924	-1.51585	-0.756954	-0.0274917	1	130	1
131	131	ENSG00000080824|HSP90AA1	1.28431	0.444932	0.487657	-1.56002	-0.692692	0.035807	1	131	1
132	132	ENSG00000117475|BLZF1	1.07152	0.599866	0.675125	-1.61314	-0.653971	-0.0793974	1	132	1
133	133	ENSG00000165572|KBTBD6	1.11985	0.52902	0.626353	-1.60367	-0.707596	0.036043	1	133	1
134	134	ENSG00000139719|VPS33A	1.18603	0.517525	0.713422	-1.48911	-0.7543	-0.173565	1	134	1
135	135	ENSG00000156261|CCT8	1.17148	0.326832	0.830767	-1.50997	-0.737551	-0.0815586	1	135	1
136	136	ENSG00000049860|HEXB	0.282684	0.377917	1.69554	-0.748339	-0.961822	-0.645982	1	136	1
137	137	ENSG00000101955|SRPX	0.316421	0.409033	1.66487	-0.892574	-0.894571	-0.603181	1	137	1
138	138	ENSG00000132386|SERPINF1	0.252779	0.544828	1.5839	-0.725984	-1.16916	-0.486362	1	138	1
139	139	ENSG00000183696|UPP1	0.15541	0.412733	1.66521	-0.89048	-1.0825	-0.260373	1	139	1
140	140	ENSG00000120889|TNFRSF10B	0.637074	0.166641	1.57291	-0.91211	-1.03884	-0.425672	1	140	1
141	141	ENSG00000121578|B4GALT4	0.684807	0.320314	1.43432	-1.00804	-1.12225	-0.309152	1	141	1
142	142	ENSG00000128335|APOL2	0.626291	0.317059	1.45481	-0.920073	-1.21437	-0.263719	1	142	1
143	143	ENSG00000134996|OSTF1	0.584708	0.289477	1.56098	-0.638762	-1.13916	-0.657241	1	143	1
144	144	ENSG00000100439|ABHD4	0.470313	0.436025	1.52769	-0.813362	-1.1845	-0.436172	1	144	1
145	145	ENSG00000204592|HLA-E	0.576509	0.498327	1.43125	-0.833798	-1.20851	-0.463778	1	145	1
146	146	ENSG00000067167|TRAM1	0.461321	0.428312	1.44917	-1.00885	-1.21337	-0.116578	1	146	1
147	147	ENSG00000100979|PLTP	0.298568	0.351836	1.5556	-0.844769	-1.28356	-0.0776733	1	147	1
148	148	ENSG00000143819|EPHX1	0.19336	0.571155	1.47942	-0.660524	-1.40727	-0.176144	1	148	1
149	149	ENSG00000172409|CLP1	0.509846	0.535029	1.27229	-0.718766	-1.52066	-0.0777391	1	149	1
150	150	ENSG00000004399|PLXND1	0.51058	0.468602	1.38773	-0.755903	-1.40752	-0.203485	1	150	1
151	151	ENSG00000137331|IER3	0.39867	0.491406	1.38672	-0.796994	-1.42782	-0.0519819	1	151	1
152	152	ENSG00000105355|PLIN3	0.75242	0.699203	1.14742	-0.883976	-1.29127	-0.423804	1	152	1
153	153	ENSG00000103876|FAH	0.557369	0.792526	1.17712	-0.875234	-1.3481	-0.303684	1	153	1
154	154	ENSG00000204525|HLA-C	0.555436	0.764536	1.20516	-0.852327	-1.35068	-0.322134	1	154	1
155	155	ENSG00000234745|HLA-B	0.63307	0.580571	1.22665	-0.82482	-1.42914	-0.186337	1	155	1
156	156	ENSG00000140382|HMG20A	0.611132	0.574851	1.31185	-0.986711	-1.23502	-0.276098	1	156	1
157	157	ENSG00000185745|IFIT1	0.717774	0.579796	1.20967	-1.03479	-1.25124	-0.221207	1	157	1
158	158	ENSG00000246705|H2AFJ	0.544752	0.676089	1.35992	-0.977113	-1.08126	-0.522383	1	158	1
159	159	ENSG00000030582|GRN	0.380519	0.749428	1.40787	-0.805782	-1.15081	-0.58123	1	159	1
160	160	ENSG00000140043|PTGR2	0.428356	0.583248	1.49591	-0.878403	-1.07911	-0.55001	1	160	1
161	161	ENSG00000177674|AGTRAP	0.556855	0.794899	1.22335	-1.16284	-1.03174	-0.380525	1	161	1
162	162	ENSG00000186834|HEXIM1	0.396323	0.90331	1.2576	-1.0517	-1.07372	-0.431805	1	162	1
163	163	ENSG00000169439|SDC2	0.411437	0.711244	1.36308	-1.01734	-1.15477	-0.313653	1	163	1
164	164	ENSG00000179071|CCDC89	0.587908	0.572285	1.34543	-1.10103	-1.10103	-0.303559	1	164	1
165	165	ENSG00000135047|CTSL	0.293758	0.174631	1.66181	-1.03591	-1.02135	-0.0729313	1	165	1
166	166	ENSG00000188313|PLSCR1	0.339059	0.000197938	1.7267	-1.11196	-0.802593	-0.151405	1	166	1
167	167	ENSG00000106049|HIBADH	-0.141965	0.198056	1.8218	-0.93628	-0.859211	-0.0824022	1	167	1
168	168	ENSG00000113140|SPARC	-0.154298	0.150251	1.79683	-0.950267	-0.904519	0.0619992	1	168	1
169	169	ENSG00000135535|CD164	0.0409095	0.407251	1.62237	-1.19248	-0.882247	0.00420261	1	169	1
170	170	ENSG00000176046|NUPR1	-0.0135037	0.254753	1.7419	-1.09619	-0.834452	-0.0525085	1	170	1
171	171	ENSG00000182224|CYB5D1	0.17555	0.454964	1.67442	-1.09767	-0.715152	-0.49211	1	171	1
172	172	ENSG00000143545|RAB13	0.297168	0.551863	1.56048	-1.1914	-0.535819	-0.682286	1	172	1
173	173	ENSG00000155366|RHOC	0.235666	0.666781	1.51752	-1.20809	-0.565873	-0.645997	1	173	1
174	174	ENSG00000073008|PVR	0.239204	0.673454	1.45701	-1.27875	-0.806344	-0.284571	1	174	1
175	175	ENSG00000157557|ETS2	0.417468	0.458711	1.46378	-1.17515	-1.037	-0.127811	1	175	1
176	176	ENSG00000164088|PPM1M	0.479267	0.288	1.51038	-1.22482	-0.945752	-0.107072	1	176	1
177	177	ENSG00000119777|TMEM214	0.434606	0.848757	0.755297	-1.05806	-1.47009	0.48949	1	177	1
178	178	ENSG00000148803|FUOM	0.446343	0.913416	0.965014	-0.914867	-1.48094	0.0710297	1	178	1
179	179	ENSG00000198695|MT-ND6	0.472799	0.806643	1.01194	-1.15574	-1.31655	0.180913	1	179	1
180	180	ENSG00000012171|SEMA3B	0.32132	1.13124	0.815571	-0.49643	-1.63951	-0.132191	1	180	1
181	181	ENSG00000036530|CYP46A1	0.259142	0.97769	0.955311	-0.414225	-1.69898	-0.0789366	1	181	1
182	182	ENSG00000126005|MMP24OS	0.673196	0.935415	0.671076	-0.516927	-1.71822	-0.0445446	1	182	1
183	183	ENSG00000130829|DUSP9	0.431423	1.09504	0.609323	-0.653538	-1.6679	0.18565	1	183	1
184	184	ENSG00000110108|TMEM109	-0.0768836	1.14385	1.27424	-1.10637	-0.81175	-0.423085	1	184	1
185	185	ENSG00000269028|MTRNR2L12	0.00358376	0.913441	1.45152	-1.05058	-0.866898	-0.451065	1	185	1
186	186	ENSG00000108639|SYNGR2	0.214162	0.912604	1.3383	-1.19428	-0.855025	-0.415764	1	186	1
187	187	ENSG00000112759|SLC29A1	0.161838	0.872628	1.38949	-1.17651	-0.868058	-0.379387	1	187	1
188	188	ENSG00000155367|PPM1J	0.146493	1.1346	1.08267	-1.26073	-0.952312	-0.150723	1	188	1
189	189	ENSG00000060138|YBX3	-0.077441	1.10997	1.08962	-1.14777	-1.11273	0.13835	1	189	1
190	190	ENSG00000169515|CCDC8	-0.0080109	1.02656	1.23629	-1.13422	-1.06199	-0.0586321	1	190	1
191	191	ENSG00000141756|FKBP10	0.17874	0.892724	1.23788	-1.04625	-1.24245	-0.0206458	1	191	1
192	192	ENSG00000140545|MFGE8	0.131892	0.718821	1.44632	-0.999722	-1.16494	-0.132374	1	192	1
193	193	ENSG00000196341|OR8D1	0.337242	0.668872	1.34663	-0.938992	-1.31697	-0.0967834	1	193	1
194	194	ENSG00000167941|SOST	0.454936	0.77809	1.20017	-1.03109	-1.29313	-0.108979	1	194	1
195	195	ENSG00000214706|IFRD2	0.492726	0.856634	1.11668	-1.08515	-1.25853	-0.122364	1	195	1
196	196	ENSG00000100889|PCK2	0.330849	1.08079	1.03775	-0.937204	-1.31457	-0.197627	1	196	1
197	197	ENSG00000162396|PARS2	0.374928	1.00209	1.08205	-1.03465	-1.25967	-0.164739	1	197	1
198	198	ENSG00000197043|ANXA6	-0.354948	1.09512	1.05507	-0.94222	-1.23582	0.382796	1	198	1
199	199	ENSG00000116661|FBXO2	-0.39741	1.31833	1.04786	-0.873605	-1.11467	0.0195002	1	199	1
200	200	ENSG00000007944|MYLIP	-0.421696	1.22398	1.10775	-1.00891	-1.03066	0.129538	1	200	1
201	201	ENSG00000142871|CYR61	-0.365889	1.17897	1.09104	-0.961543	-1.14841	0.205832	1	201	1
202	202	ENSG00000244509|APOBEC3C	-0.483008	0.789535	1.3379	-1.00992	-1.06963	0.435117	1	202	1
203	203	ENSG00000160932|LY6E	-0.487892	0.772717	1.49282	-0.87598	-1.06829	0.166629	1	203	1
204	204	ENSG00000173762|CD7	-0.461773	0.733575	1.45652	-0.797593	-1.19266	0.261933	1	204	1
205	205	ENSG00000119630|PGF	-0.213894	0.852082	1.30434	-0.797239	-1.35861	0.213319	1	205	1
206	206	ENSG00000172260|NEGR1	-0.303494	0.988361	1.34843	-0.925144	-1.12103	0.0128709	1	206	1
207	207	ENSG00000087077|TRIP6	-0.134901	1.31859	0.995757	-0.98203	-1.1327	-0.0647193	1	207	1
208	208	ENSG00000161618|ALDH16A1	0.112674	1.33269	0.867181	-0.897267	-1.27889	-0.136392	1	208	1
209	209	ENSG00000256045|MTRNR2L10	-0.0427573	1.44845	0.733232	-0.816423	-1.30215	-0.020352	1	209	1
210	210	ENSG00000165912|PACSIN3	0.110815	1.07528	0.792157	-0.730503	-1.59648	0.348725	1	210	1
211	211	ENSG00000172366|MCRIP2	-0.0223042	1.30023	0.753028	-0.808133	-1.43029	0.207471	1	211	1
212	212	ENSG00000125733|TRIP10	0.0828785	1.02427	0.976992	-0.982021	-1.39302	0.290898	1	212	1
213	213	ENSG00000152669|CCNO	0.247484	1.18909	0.853553	-0.893551	-1.41335	0.0167797	1	213	1
214	214	ENSG00000105722|ERF	-0.0939071	1.81622	0.331682	-0.954454	-0.732861	-0.366678	1	214	1
215	215	ENSG00000152977|ZIC1	-0.0286626	1.66041	0.61041	-1.09292	-0.660571	-0.488669	1	215	1
216	216	ENSG00000072182|ASIC4	-0.169442	1.80923	0.458228	-0.60097	-0.692575	-0.804472	1	216	1
217	217	ENSG00000168884|TNIP2	-0.102674	1.73539	0.581436	-0.713123	-0.701887	-0.799142	1	217	1
218	218	ENSG00000113719|ERGIC1	0.286125	1.79561	0.155939	-0.763649	-0.743256	-0.730767	1	218	1
219	219	ENSG00000211445|GPX3	0.176578	1.78467	0.287804	-0.651795	-0.782756	-0.814499	1	219	1
220	220	ENSG00000119973|PRLHR	0.0597844	1.7466	0.468316	-0.746637	-0.791934	-0.736125	1	220	1
221	221	ENSG00000149476|TKFC	0.120367	1.71384	0.471228	-0.900699	-0.821311	-0.583428	1	221	1
222	222	ENSG00000177352|CCDC71	0.0505651	1.76479	0.423552	-0.889209	-0.706875	-0.642819	1	222	1
223	223	ENSG00000131503|ANKHD1	-0.475421	1.83385	0.284532	-0.922199	-0.0288618	-0.6919	1	223	1
224	224	ENSG00000167702|KIFC2	-0.214446	1.83888	0.269245	-0.848544	-0.180616	-0.864519	1	224	1
225	225	ENSG00000161999|JMJD8	-0.00184677	1.8712	0.193961	-0.636533	-0.5756	-0.851179	1	225	1
226	226	ENSG00000099364|FBXL19	-0.236037	1.92131	0.157821	-0.641564	-0.383408	-0.818125	1	226	1
227	227	ENSG00000163870|TPRA1	-0.188818	1.92561	0.136392	-0.497729	-0.539254	-0.836202	1	227	1
228	228	ENSG00000163528|CHCHD4	0.0419036	1.79428	0.259298	-0.92078	-0.292606	-0.8821	1	228	1
229	229	ENSG00000164897|TMUB1	0.112302	1.84305	0.126166	-0.860483	-0.399849	-0.821181	1	229	1
230	230	ENSG00000160211|G6PD	0.0231379	1.75049	0.442333	-0.807739	-0.485459	-0.92276	1	230	1
231	231	ENSG00000172009|THOP1	0.0939059	1.78004	0.281436	-0.771675	-0.383123	-1.00058	1	231	1
232	232	ENSG00000058404|CAMK2B	0.330086	1.37629	0.729545	-0.820584	-0.314399	-1.30094	1	232	1
233	233	ENSG00000185236|RAB11B	0.376704	1.40975	0.629077	-0.898769	-0.250005	-1.26676	1	233	1
234	234	ENSG00000168040|FADD	0.267949	1.31052	0.808571	-0.831912	-0.204995	-1.35013	1	234	1
235	235	ENSG00000239857|GET4	0.119321	1.44155	0.723442	-0.783106	-0.183042	-1.31817	1	235	1
236	236	ENSG00000130733|YIPF2	-0.128275	1.52016	0.802926	-0.785557	-0.24754	-1.16172	1	236	1
237	237	ENSG00000129990|SYT5	0.0371761	1.63169	0.57301	-0.823497	-0.306826	-1.11156	1	237	1
238	238	ENSG00000174939|ASPHD1	0.0565123	1.6027	0.530719	-0.933866	-0.135322	-1.12075	1	238	1
239	239	ENSG00000124104|SNX21	-0.107657	1.30219	1.01361	-1.15091	-0.0916739	-0.965558	1	239	1
240	240	ENSG00000272325|NUDT3	0.112702	1.38072	0.798916	-1.04079	-0.0890074	-1.16254	1	240	1
241	241	ENSG00000160401|CFAP157	0.0546943	1.36058	0.897526	-1.18863	-0.177649	-0.946521	1	241	1
242	242	ENSG00000213626|LBH	0.154769	1.39451	0.804905	-1.21403	-0.209741	-0.930414	1	242	1
243	243	ENSG00000139624|CERS5	0.288176	1.32097	0.93832	-0.981193	-0.557101	-1.00918	1	243	1
244	244	ENSG00000141933|TPGS1	0.177084	1.40058	0.888397	-0.93903	-0.47188	-1.05515	1	244	1
245	245	ENSG00000168118|RAB4A	0.319963	1.34064	0.836198	-1.09233	-0.369362	-1.03511	1	245	1
246	246	ENSG00000126062|TMEM115	0.366618	1.32579	0.85946	-1.05689	-0.487946	-1.00702	1	246	1
247	247	ENSG00000131446|MGAT1	0.370713	1.32483	0.849591	-1.0689	-0.461152	-1.01508	1	247	1
248	248	ENSG00000130826|DKC1	0.195594	1.41864	0.833184	-1.10451	-0.41322	-0.929686	1	248	1
249	249	ENSG00000181873|IBA57	0.180727	1.31018	0.983959	-1.09	-0.432095	-0.952778	1	249	1
250	250	ENSG00000163485|ADORA1	-0.0252808	1.35752	1.05401	-0.933362	-0.482526	-0.970354	1	250	1
251	251	ENSG00000100321|SYNGR1	0.070327	1.37563	0.999481	-0.860928	-0.560738	-1.02377	1	251	1
252	252	ENSG00000184672|RALYL	0.0545305	1.31902	1.05566	-0.88581	-0.482636	-1.06076	1	252	1
253	253	ENSG00000147036|LANCL3	-0.0859855	1.29717	1.08775	-0.973465	-0.275003	-1.05047	1	253	1
254	254	ENSG00000166246|C16orf71	0.11689	1.27229	1.02575	-0.945947	-0.321167	-1.14782	1	254	1
255	255	ENSG00000116273|PHF13	0.203271	1.49519	0.732701	-1.18954	-0.606391	-0.635237	1	255	1
256	256	ENSG00000144118|RALB	0.333964	1.52267	0.618592	-1.13235	-0.630167	-0.712716	1	256	1
257	257	ENSG00000115274|INO80B	0.0282755	1.61406	0.638243	-1.08175	-0.378207	-0.820626	1	257	1
258	258	ENSG00000138080|EMILIN1	-0.00202563	1.61192	0.702524	-0.89535	-0.482201	-0.934872	1	258	1
259	259	ENSG00000169682|SPNS1	0.145424	1.61089	0.605314	-0.94886	-0.46228	-0.950491	1	259	1
260	260	ENSG00000204536|CCHCR1	0.229018	1.59249	0.625414	-0.877386	-0.687672	-0.881864	1	260	1
261	261	ENSG00000179922|ZNF784	0.275289	1.59161	0.575463	-0.943895	-0.597257	-0.90121	1	261	1
262	262	ENSG00000182173|TSEN54	0.269842	1.58969	0.576198	-0.966344	-0.569343	-0.900047	1	262	1
263	263	ENSG00000183020|AP2A2	0.417895	1.47064	0.635417	-1.03423	-0.545413	-0.944312	1	263	1
264	264	ENSG00000129932|DOHH	0.344981	1.45195	0.738171	-0.937482	-0.607929	-0.98969	1	264	1
265	265	ENSG00000033100|CHPF2	0.433558	1.377	0.760254	-1.01603	-0.557253	-0.997532	1	265	1
266	266	ENSG00000100395|L3MBTL2	0.43278	1.41685	0.719994	-0.971762	-0.617371	-0.980494	1	266	1
267	267	ENSG00000006282|SPATA20	0.271032	1.51185	0.672811	-0.86672	-0.499066	-1.08991	1	267	1
268	268	ENSG00000154545|MAGED4	0.466533	1.43416	0.660679	-0.79021	-0.66639	-1.10477	1	268	1
269	269	ENSG00000204859|ZBTB48	0.420171	1.44092	0.699642	-0.815648	-0.685757	-1.05933	1	269	1
270	270	ENSG00000158828|PINK1	0.47983	1.59929	0.346609	-0.852407	-0.534063	-1.03926	1	270	1
271	271	ENSG00000162650|ATXN7L2	0.472722	1.60873	0.343872	-0.796166	-0.580816	-1.04835	1	271	1
272	272	ENSG00000198517|MAFK	0.342268	1.64996	0.345711	-0.787106	-0.444576	-1.10625	1	272	1
273	273	ENSG00000169696|ASPSCR1	0.356922	1.65064	0.374013	-0.731104	-0.589025	-1.06144	1	273	1
274	274	ENSG00000213638|ADAT3	0.319526	1.68569	0.34413	-0.778122	-0.564151	-1.00707	1	274	1
275	275	ENSG00000145022|TCTA	0.4718	1.49946	0.570193	-0.848551	-0.686931	-1.00597	1	275	1
276	276	ENSG00000177646|ACAD9	0.530424	1.52804	0.467072	-0.850367	-0.697271	-0.977896	1	276	1
277	277	ENSG00000167778|SPRYD3	0.39077	1.52046	0.575002	-0.79611	-0.57784	-1.11228	1	277	1
278	278	ENSG00000028277|POU2F2	0.46178	1.52641	0.485207	-0.722726	-0.586688	-1.16399	1	278	1
279	279	ENSG00000122390|NAA60	0.472175	1.50085	0.512439	-0.784446	-0.534412	-1.1666	1	279	1
280	280	ENSG00000157870|PRXL2B	0.424526	1.43838	0.597587	-0.937009	-0.340281	-1.1832	1	280	1
281	281	ENSG00000162706|CADM3	0.453906	1.47628	0.522753	-0.986839	-0.350492	-1.11561	1	281	1
282	282	ENSG00000213462|ERV3-1	0.369097	1.55568	0.44326	-0.846319	-0.328972	-1.19275	1	282	1
283	283	ENSG00000105619|TFPT	0.439308	1.45951	0.53521	-0.844701	-0.339752	-1.24958	1	283	1
284	284	ENSG00000167578|RAB4B	0.434913	1.50669	0.479724	-0.787533	-0.395158	-1.23864	1	284	1
285	285	ENSG00000173653|RCE1	0.458303	1.51402	0.502303	-0.973554	-0.458152	-1.04292	1	285	1
286	286	ENSG00000100263|RHBDD3	0.326714	1.59338	0.49847	-0.945758	-0.484538	-0.988272	1	286	1
287	287	ENSG00000108551|RASD1	0.379365	1.60181	0.449298	-0.855585	-0.54637	-1.02852	1	287	1
288	288	ENSG00000162959|MEMO1	0.314609	1.52859	0.560342	-1.0451	-0.336064	-1.02238	1	288	1
289	289	ENSG00000129951|PLPPR3	0.420478	1.57316	0.39316	-1.04867	-0.35381	-0.984318	1	289	1
290	290	ENSG00000179918|SEPHS2	0.393265	1.59254	0.370364	-1.06938	-0.326759	-0.96003	1	290	1
291	291	ENSG00000146063|TRIM41	-0.0429857	1.40949	1.03309	-0.694081	-0.916305	-0.789208	1	291	1
292	292	ENSG00000129925|TMEM8A	-0.0415162	1.47326	0.945659	-0.711316	-0.69231	-0.973778	1	292	1
293	293	ENSG00000250644|AC068580.4	0.0102145	1.41149	0.997718	-0.688454	-0.723934	-1.00703	1	293	1
294	294	ENSG00000119574|ZBTB45	0.194876	1.55775	0.712064	-0.7954	-0.869729	-0.799565	1	294	1
295	295	ENSG00000154222|CC2D1B	0.125413	1.51215	0.78312	-0.513009	-0.925308	-0.982363	1	295	1
296	296	ENSG00000160741|CRTC2	0.0726917	1.55544	0.760058	-0.585708	-0.778519	-1.02396	1	296	1
297	297	ENSG00000105650|PDE4C	0.0716468	1.37126	0.912905	-0.441813	-0.600473	-1.31353	1	297	1
298	298	ENSG00000112640|PPP2R5D	-0.0861282	1.40867	0.97705	-0.573714	-0.520045	-1.20583	1	298	1
299	299	ENSG00000131067|GGT7	-0.0711893	1.48957	0.864048	-0.378244	-0.760379	-1.1438	1	299	1
300	300	ENSG00000170037|CNTROB	0.11149	1.45144	0.780967	-0.276067	-0.865412	-1.20242	1	300	1
301	301	ENSG00000090661|CERS4	-0.0881107	1.38426	0.966416	-0.246715	-1.16507	-0.850785	1	301	1
302	302	ENSG00000177548|RABEP2	-0.0394189	1.1935	1.17556	-0.297184	-1.15466	-0.877797	1	302	1
303	303	ENSG00000086544|ITPKC	0.233411	1.552	0.532606	-0.222101	-1.10865	-0.987266	1	303	1
304	304	ENSG00000088882|CPXM1	0.0872568	1.51852	0.647581	-0.13331	-1.09188	-1.02817	1	304	1
305	305	ENSG00000099840|IZUMO4	-0.0280181	1.56726	0.615599	-0.0784935	-1.07122	-1.00513	1	305	1
306	306	ENSG00000278195|SSTR3	0.231698	1.35987	0.850017	-0.329669	-1.18966	-0.92226	1	306	1
307	307	ENSG00000005206|SPPL2B	0.227328	1.45347	0.731895	-0.320652	-0.979095	-1.11294	1	307	1
308	308	ENSG00000249115|HAUS5	0.251085	1.43097	0.790555	-0.436214	-1.00121	-1.03519	1	308	1
309	309	ENSG00000132330|SCLY	0.706499	1.3242	0.55103	-0.546079	-0.826031	-1.20962	1	309	1
310	310	ENSG00000161036|LRWD1	0.673456	1.3472	0.533986	-0.56448	-0.723645	-1.26652	1	310	1
311	311	ENSG00000031823|RANBP3	0.519082	1.36792	0.688615	-0.643814	-0.737058	-1.19474	1	311	1
312	312	ENSG00000107816|LZTS2	0.51117	1.376	0.644	-0.556312	-0.69496	-1.2799	1	312	1
313	313	ENSG00000088826|SMOX	0.547596	1.43393	0.492011	-0.450175	-0.735776	-1.28759	1	313	1
314	314	ENSG00000100890|KIAA0391	0.528309	1.41386	0.525313	-0.526776	-0.592677	-1.34803	1	314	1
315	315	ENSG00000100124|ANKRD54	0.626587	1.45978	0.411209	-0.66363	-0.612634	-1.22131	1	315	1
316	316	ENSG00000165175|MID1IP1	0.640842	1.47574	0.387266	-0.677583	-0.653505	-1.17276	1	316	1
317	317	ENSG00000126767|ELK1	0.63028	1.48346	0.34211	-0.621341	-0.588407	-1.2461	1	317	1
318	318	ENSG00000128596|CCDC136	0.635748	1.48502	0.332247	-0.563117	-0.647299	-1.2426	1	318	1
319	319	ENSG00000205593|DENND6B	0.48303	1.54025	0.432097	-0.641485	-0.632175	-1.18172	1	319	1
320	320	ENSG00000137815|RTF1	0.568848	1.4153	0.543978	-0.687202	-0.595902	-1.24502	1	320	1
321	321	ENSG00000105701|FKBP8	0.574853	1.43167	0.490411	-0.684734	-0.539716	-1.27248	1	321	1
322	322	ENSG00000163517|HDAC11	0.595621	1.4332	0.463831	-0.651388	-0.562428	-1.27883	1	322	1
323	323	ENSG00000162426|SLC45A1	0.338743	1.47685	0.58971	-0.357107	-0.767863	-1.28034	1	323	1
324	324	ENSG00000116260|QSOX1	0.362761	1.41449	0.707659	-0.41831	-0.865283	-1.20131	1	324	1
325	325	ENSG00000176454|LPCAT4	0.455396	1.4324	0.60602	-0.451475	-0.816008	-1.22633	1	325	1
326	326	ENSG00000124574|ABCC10	0.429699	1.40313	0.504596	-0.222044	-0.667024	-1.44836	1	326	1
327	327	ENSG00000186862|PDZD7	0.594806	1.37469	0.489843	-0.341218	-0.77903	-1.33909	1	327	1
328	328	ENSG00000215440|NPEPL1	0.655687	1.31544	0.475247	-0.297396	-0.745611	-1.40337	1	328	1
329	329	ENSG00000014216|CAPN1	0.330125	1.45801	0.755942	-0.7592	-0.7818	-1.00308	1	329	1
330	330	ENSG00000180448|ARHGAP45	0.332312	1.47123	0.72917	-0.754891	-0.741988	-1.03583	1	330	1
331	331	ENSG00000135723|FHOD1	0.208181	1.49861	0.770609	-0.711133	-0.722775	-1.04349	1	331	1
332	332	ENSG00000163719|MTMR14	0.280939	1.41535	0.83907	-0.710794	-0.76385	-1.06072	1	332	1
333	333	ENSG00000167703|SLC43A2	0.5079	1.40657	0.66838	-0.641057	-0.869386	-1.07241	1	333	1
334	334	ENSG00000183751|TBL3	0.347438	1.49609	0.671409	-0.606086	-0.931858	-0.976992	1	334	1
335	335	ENSG00000105137|SYDE1	0.393997	1.49165	0.622958	-0.554471	-0.890688	-1.06344	1	335	1
336	336	ENSG00000166887|VPS39	0.390948	1.53795	0.554634	-0.565001	-0.873753	-1.04478	1	336	1
337	337	ENSG00000007541|PIGQ	0.451514	1.44622	0.621568	-0.860673	-0.511567	-1.14707	1	337	1
338	338	ENSG00000148158|SNX30	0.44892	1.38449	0.727237	-0.873414	-0.555049	-1.13219	1	338	1
339	339	ENSG00000100416|TRMU	0.541369	1.361	0.640324	-0.839566	-0.471172	-1.23195	1	339	1
340	340	ENSG00000119431|HDHD3	0.451031	1.40096	0.667389	-0.904922	-0.442279	-1.17217	1	340	1
341	341	ENSG00000152969|JAKMIP1	0.493841	1.35126	0.685603	-0.877874	-0.424184	-1.22865	1	341	1
342	342	ENSG00000204439|C6orf47	0.502777	1.38471	0.631918	-0.904485	-0.414778	-1.20014	1	342	1
343	343	ENSG00000039650|PNKP	0.483936	1.37084	0.708395	-0.744877	-0.611809	-1.20649	1	343	1
344	344	ENSG00000204498|NFKBIL1	0.51369	1.3352	0.740744	-0.773603	-0.62765	-1.18838	1	344	1
345	345	ENSG00000130717|UCK1	0.560573	1.33232	0.682899	-0.781658	-0.562484	-1.23165	1	345	1
346	346	ENSG00000213859|KCTD11	0.536588	1.29727	0.746373	-0.73588	-0.58323	-1.26112	1	346	1
347	347	ENSG00000111737|RAB35	0.349243	1.40985	0.70309	-0.670487	-0.48272	-1.30898	1	347	1
348	348	ENSG00000151117|TMEM86A	0.421175	1.40659	0.644363	-0.700979	-0.456001	-1.31515	1	348	1
349	349	ENSG00000177733|HNRNPA0	0.400124	1.412	0.650236	-0.669415	-0.467577	-1.32537	1	349	1
350	350	ENSG00000221978|CCNL2	0.4444	1.34197	0.761483	-0.727111	-0.567199	-1.25354	1	350	1
351	351	ENSG00000103549|RNF40	0.365435	1.366	0.755602	-0.742727	-0.449887	-1.29442	1	351	1
352	352	ENSG00000225110|PNMA6F	0.413832	1.34955	0.75804	-0.767892	-0.485764	-1.26776	1	352	1
353	353	ENSG00000089723|OTUB2	0.408725	1.49	0.526537	-0.58207	-0.535509	-1.30768	1	353	1
354	354	ENSG00000100604|CHGA	0.364234	1.44501	0.620329	-0.59512	-0.494311	-1.34014	1	354	1
355	355	ENSG00000132522|GPS2	0.507003	1.42982	0.545665	-0.748281	-0.456527	-1.27768	1	355	1
356	356	ENSG00000067191|CACNB1	0.445991	1.49202	0.46757	-0.686958	-0.407869	-1.31075	1	356	1
357	357	ENSG00000197785|ATAD3A	0.4795	1.50017	0.467189	-0.683309	-0.508062	-1.25549	1	357	1
358	358	ENSG00000007516|BAIAP3	0.267891	1.59359	0.436963	-0.494519	-0.498146	-1.30578	1	358	1
359	359	ENSG00000122490|PQLC1	0.234349	1.62375	0.452826	-0.551162	-0.52542	-1.23435	1	359	1
360	360	ENSG00000178761|FAM219B	0.365481	1.57462	0.406693	-0.641014	-0.431081	-1.2747	1	360	1
361	361	ENSG00000163462|TRIM46	0.430325	1.55513	0.350747	-0.598766	-0.418439	-1.319	1	361	1
362	362	ENSG00000166169|POLL	0.409365	1.5434	0.414642	-0.577093	-0.481192	-1.30913	1	362	1
363	363	ENSG00000172346|CSDC2	0.478261	1.56599	0.296599	-0.455895	-0.591353	-1.29361	1	363	1
364	364	ENSG00000128011|LRFN1	0.527988	1.62325	0.149039	-0.472006	-0.622585	-1.20569	1	364	1
365	365	ENSG00000272333|KMT2B	0.528733	1.60678	0.144501	-0.507162	-0.506237	-1.26662	1	365	1
366	366	ENSG00000103150|MLYCD	0.494801	1.61928	0.182098	-0.512482	-0.54078	-1.24292	1	366	1
367	367	ENSG00000161904|LEMD2	0.505237	1.63072	0.173476	-0.559647	-0.549832	-1.19995	1	367	1
368	368	ENSG00000182872|RBM10	0.441449	1.63237	0.309875	-0.651677	-0.621195	-1.11082	1	368	1
369	369	ENSG00000205927|OLIG2	0.545726	1.60044	0.253017	-0.595133	-0.683743	-1.1203	1	369	1
370	370	ENSG00000166848|TERF2IP	0.601301	1.54618	0.278194	-0.68986	-0.561352	-1.17446	1	370	1
371	371	ENSG00000099889|ARVCF	0.498492	1.61679	0.234714	-0.702831	-0.483107	-1.16406	1	371	1
372	372	ENSG00000105516|DBP	0.452028	1.61329	0.288913	-0.620742	-0.533811	-1.19968	1	372	1
373	373	ENSG00000167363|FN3K	0.588763	1.52254	0.346655	-0.495344	-0.833413	-1.1292	1	373	1
374	374	ENSG00000196878|LAMB3	0.52889	1.58563	0.331171	-0.59338	-0.806252	-1.04606	1	374	1
375	375	ENSG00000139182|CLSTN3	0.309445	1.61638	0.48067	-0.631363	-0.679784	-1.09535	1	375	1
376	376	ENSG00000180834|MAP6D1	0.312746	1.66989	0.319782	-0.437483	-0.731189	-1.13374	1	376	1
377	377	ENSG00000060491|OGFR	0.249486	1.68704	0.364792	-0.505592	-0.684975	-1.11075	1	377	1
378	378	ENSG00000142409|ZNF787	0.306351	1.66741	0.373213	-0.587859	-0.663008	-1.09611	1	378	1
379	379	ENSG00000117411|B4GALT2	0.684817	1.41999	0.243531	-0.213762	-0.810939	-1.32364	1	379	1
380	380	ENSG00000140323|DISP2	0.697731	1.48656	0.119745	-0.376292	-0.583549	-1.34419	1	380	1
381	381	ENSG00000185133|INPP5J	0.691255	1.54007	0.0128146	-0.294431	-0.68953	-1.26018	1	381	1
382	382	ENSG00000128482|RNF112	0.246448	1.75827	0.133243	-0.365184	-0.636123	-1.13665	1	382	1
383	383	ENSG00000109066|TMEM104	0.432513	1.71273	0.0107566	-0.349503	-0.652751	-1.15375	1	383	1
384	384	ENSG00000136699|SMPD4	0.409115	1.72208	0.0069177	-0.430823	-0.518998	-1.18829	1	384	1
385	385	ENSG00000141577|CEP131	0.414517	1.62731	0.055847	-0.190096	-0.552928	-1.35465	1	385	1
386	386	ENSG00000010295|IFFO1	0.362243	1.61142	0.28091	-0.271272	-0.715207	-1.2681	1	386	1
387	387	ENSG00000095370|SH2D3C	0.339937	1.68566	0.113638	-0.218818	-0.697357	-1.22306	1	387	1
388	388	ENSG00000160072|ATAD3B	0.274605	1.71554	0.163303	-0.256134	-0.737308	-1.16001	1	388	1
389	389	ENSG00000075043|KCNQ2	0.536942	1.38614	0.516139	-0.615742	-0.420706	-1.40277	1	389	1
390	390	ENSG00000171574|ZNF584	0.467908	1.38432	0.583728	-0.635581	-0.400503	-1.39987	1	390	1
391	391	ENSG00000111671|SPSB2	0.45599	1.35508	0.567402	-0.588314	-0.309656	-1.4805	1	391	1
392	392	ENSG00000168282|MGAT2	0.547881	1.26976	0.628836	-0.563462	-0.392999	-1.49002	1	392	1
393	393	ENSG00000176248|ANAPC2	0.551814	1.32259	0.574798	-0.605828	-0.397357	-1.44601	1	393	1
394	394	ENSG00000145916|RMND5B	0.549703	1.28453	0.543033	-0.721134	-0.171744	-1.48439	1	394	1
395	395	ENSG00000141698|NT5C3B	0.454198	1.36173	0.601904	-0.729396	-0.287575	-1.40086	1	395	1
396	396	ENSG00000160226|CFAP410	0.482217	1.29668	0.67035	-0.724967	-0.303324	-1.42096	1	396	1
397	397	ENSG00000162073|PAQR4	0.659361	1.34199	0.362924	-0.46708	-0.394192	-1.50301	1	397	1
398	398	ENSG00000067836|ROGDI	0.589653	1.32329	0.447083	-0.571127	-0.271933	-1.51697	1	398	1
399	399	ENSG00000099899|TRMT2A	0.550226	1.38849	0.3915	-0.553175	-0.28391	-1.49314	1	399	1
400	400	ENSG00000088543|C3orf18	0.376604	1.45165	0.384252	-0.379878	-0.291945	-1.54068	1	400	1
401	401	ENSG00000100982|PCIF1	0.529989	1.3851	0.32069	-0.460751	-0.212942	-1.56209	1	401	1
402	402	ENSG00000164077|MON1A	0.500632	1.36151	0.415221	-0.437025	-0.272533	-1.5678	1	402	1
403	403	ENSG00000103056|SMPD3	0.272711	1.56515	0.347915	-0.541851	-0.22613	-1.4178	1	403	1
404	404	ENSG00000114631|PODXL2	0.270627	1.60711	0.273524	-0.58745	-0.189739	-1.37407	1	404	1
405	405	ENSG00000131584|ACAP3	0.444527	1.50759	0.316224	-0.565649	-0.276879	-1.42581	1	405	1
406	406	ENSG00000160190|SLC37A1	0.389441	1.52852	0.302176	-0.626272	-0.181215	-1.41265	1	406	1
407	407	ENSG00000102178|UBL4A	0.404657	1.56255	0.311426	-0.705751	-0.256054	-1.31683	1	407	1
408	408	ENSG00000275074|NUDT18	0.410308	1.59641	0.306208	-0.674289	-0.376537	-1.2621	1	408	1
409	409	ENSG00000100997|ABHD12	0.213196	1.66167	0.28953	-0.582661	-0.281394	-1.30034	1	409	1
410	410	ENSG00000161914|ZNF653	0.283508	1.67558	0.170708	-0.528292	-0.290165	-1.31134	1	410	1
411	411	ENSG00000167619|TMEM145	0.172631	1.69394	0.403873	-0.659558	-0.485141	-1.12574	1	411	1
412	412	ENSG00000042429|MED17	0.0839026	1.61966	0.550035	-0.615915	-0.402449	-1.23523	1	412	1
413	413	ENSG00000038358|EDC4	0.178006	1.60176	0.536545	-0.591942	-0.489559	-1.23481	1	413	1
414	414	ENSG00000235194|PPP1R3E	0.210418	1.59307	0.553472	-0.637132	-0.523235	-1.19659	1	414	1
415	415	ENSG00000100034|PPM1F	0.196635	1.58189	0.466063	-0.676992	-0.257139	-1.31046	1	415	1
416	416	ENSG00000154096|THY1	0.188417	1.51055	0.56101	-0.714741	-0.196742	-1.3485	1	416	1
417	417	ENSG00000092098|RNF31	0.0760766	1.62468	0.402411	-0.504344	-0.224871	-1.37396	1	417	1
418	418	ENSG00000196199|MPHOSPH8	0.157657	1.57164	0.537532	-0.52785	-0.408231	-1.33074	1	418	1
419	419	ENSG00000241978|AKAP2	0.0749237	1.59105	0.508018	-0.47696	-0.330133	-1.36689	1	419	1
420	420	ENSG00000167394|ZNF668	-0.445937	1.55679	0.630287	-0.192838	-0.164046	-1.38426	1	420	1
421	421	ENSG00000125533|BHLHE23	-0.13861	1.65003	0.596243	-0.506921	-0.373455	-1.22729	1	421	1
422	422	ENSG00000131370|SH3BP5	-0.38809	1.69842	0.600651	-0.492847	-0.287453	-1.13068	1	422	1
423	423	ENSG00000099910|KLHL22	-0.0980524	1.66573	0.518084	-0.26463	-0.579657	-1.24148	1	423	1
424	424	ENSG00000143171|RXRG	-0.329443	1.69621	0.605139	-0.286973	-0.571985	-1.11294	1	424	1
425	425	ENSG00000185669|SNAI3	-0.245852	1.76255	0.509051	-0.396598	-0.603061	-1.02609	1	425	1
426	426	ENSG00000087157|PGS1	0.19765	1.33494	0.68692	-0.172851	-0.483553	-1.56311	1	426	1
427	427	ENSG00000100325|ASCC2	0.202118	1.30943	0.756771	-0.119356	-0.65702	-1.49195	1	427	1
428	428	ENSG00000100324|TAB1	0.429177	1.34366	0.456462	0.0839229	-0.912189	-1.40103	1	428	1
429	429	ENSG00000145901|TNIP1	0.321513	1.36842	0.319145	0.214861	-0.663023	-1.56091	1	429	1
430	430	ENSG00000101489|CELF4	0.281933	1.51565	0.325125	-0.00690807	-0.684243	-1.43156	1	430	1
431	431	ENSG00000160888|IER2	0.393197	1.39125	0.382934	0.0361952	-0.693136	-1.51044	1	431	1
432	432	ENSG00000161653|NAGS	0.233174	1.60113	0.270084	0.0307362	-0.947717	-1.18741	1	432	1
433	433	ENSG00000214756|CSKMT	0.30426	1.67298	0.251302	-0.237308	-0.938187	-1.05305	1	433	1
434	434	ENSG00000100038|TOP3B	-0.119764	1.54859	0.598064	0.0122512	-0.745135	-1.29401	1	434	1
435	435	ENSG00000160613|PCSK7	-0.231441	1.74427	0.346081	0.00675246	-0.784886	-1.08078	1	435	1
436	436	ENSG00000253309|SERPINE3	-0.431272	2.00228	-0.188067	-0.194589	-0.707188	-0.481166	1	436	1
437	437	ENSG00000169856|ONECUT1	-0.180741	1.96151	-0.130229	-0.291694	-0.896836	-0.462009	1	437	1
438	438	ENSG00000177192|PUS1	-2.40628e-05	1.94144	-0.264024	-0.303168	-0.93704	-0.437188	1	438	1
439	439	ENSG00000183048|SLC25A10	-0.0386014	1.94423	-0.0624076	-0.820771	-0.606628	-0.415825	1	439	1
440	440	ENSG00000069482|GAL	-0.130321	1.96087	-0.378795	-0.717155	-0.691639	-0.0429599	1	440	1
441	441	ENSG00000250479|CHCHD10	-0.316137	1.97736	-0.265869	-0.686004	-0.668719	-0.0406259	1	441	1
442	442	ENSG00000125520|SLC2A4RG	0.0205112	1.60678	0.357256	-0.90372	-1.20727	0.126437	1	442	1
443	443	ENSG00000164442|CITED2	-0.0551561	1.76856	0.302058	-0.830404	-1.03195	-0.153106	1	443	1
444	444	ENSG00000125753|VASP	0.192467	1.83211	-0.225429	-0.303678	-1.16311	-0.332361	1	444	1
445	445	ENSG00000115138|POMC	0.339308	1.76139	-0.279908	-0.650453	-1.1311	-0.0392381	1	445	1
446	446	ENSG00000198400|NTRK1	0.124783	1.87416	-0.294291	-0.638839	-0.985265	-0.0805476	1	446	1
447	447	ENSG00000101438|SLC32A1	-0.104355	1.85139	-0.270365	-0.297049	0.00365547	-1.18327	1	447	1
448	448	ENSG00000122386|ZNF205	0.00753571	1.92475	-0.325101	-0.366505	-0.242421	-0.998254	1	448	1
449	449	ENSG00000130244|FAM98C	-0.0776113	1.95014	-0.447383	-0.409715	-0.115706	-0.899728	1	449	1
450	450	ENSG00000077454|LRCH4	-0.362591	1.99691	-0.0559795	-0.385524	-0.502334	-0.690484	1	450	1
451	451	ENSG00000196408|NOXO1	-0.250724	2.00031	-0.217928	-0.477476	-0.298186	-0.755992	1	451	1
452	452	ENSG00000076984|MAP2K7	0.0831696	1.80679	0.0648717	-0.482515	-0.28466	-1.18766	1	452	1
453	453	ENSG00000153443|UBALD1	-0.0471916	1.76941	0.269045	-0.508064	-0.274427	-1.20877	1	453	1
454	454	ENSG00000109851|DBX1	0.155494	1.86098	-0.152498	-0.447883	-0.329873	-1.08623	1	454	1
455	455	ENSG00000105204|DYRK1B	0.0575876	1.80292	-0.0396538	-0.265684	-0.295531	-1.25963	1	455	1
456	456	ENSG00000117480|FAAH	0.0380383	1.83983	-0.187647	-0.241561	-0.239213	-1.20945	1	456	1
457	457	ENSG00000145248|SLC10A4	-0.138903	1.9309	-0.509636	-0.785987	0.106516	-0.602892	1	457	1
458	458	ENSG00000088247|KHSRP	-0.0532898	1.91176	-0.473264	-1.01973	-0.106182	-0.259287	1	458	1
459	459	ENSG00000176170|SPHK1	0.0812042	1.9005	-0.228127	-1.00777	-0.239228	-0.506583	1	459	1
460	460	ENSG00000147601|TERF1	-0.0300511	1.66262	0.108727	-1.4132	0.129236	-0.457332	1	460	1
461	461	ENSG00000230626|AC011005.1	-0.0149085	1.69034	0.0391694	-1.37321	0.143169	-0.484553	1	461	1
462	462	ENSG00000138136|LBX1	0.0410883	1.79069	0.056278	-1.25668	-0.386476	-0.244902	1	462	1
463	463	ENSG00000147274|RBMX	0.207538	1.824	-0.191541	-1.16773	-0.379173	-0.293091	1	463	1
464	464	ENSG00000160113|NR2F6	0.280683	1.77189	0.00271084	-1.1834	-0.412743	-0.459143	1	464	1
465	465	ENSG00000154134|ROBO3	0.931269	1.4633	-0.0999164	-0.924077	-0.992159	-0.378419	1	465	1
466	466	ENSG00000126012|KDM5C	1.0136	1.40083	-0.280505	-0.927161	-1.01801	-0.188762	1	466	1
467	467	ENSG00000239306|RBM14	1.00946	1.47746	-0.40495	-0.891612	-0.850764	-0.339601	1	467	1
468	468	ENSG00000089280|FUS	1.03265	1.34672	-0.306008	-0.746245	-1.20617	-0.120947	1	468	1
469	469	ENSG00000133895|MEN1	0.774593	1.49201	-0.0969645	-0.856203	-1.19005	-0.123387	1	469	1
470	470	ENSG00000139697|SBNO1	0.713286	1.55268	-0.183496	-0.83697	-1.15687	-0.0886323	1	470	1
471	471	ENSG00000105723|GSK3A	0.677115	1.67602	-0.559734	-1.07874	-0.365391	-0.349273	1	471	1
472	472	ENSG00000107404|DVL1	0.950701	1.522	-0.626812	-1.00941	-0.513245	-0.323231	1	472	1
473	473	ENSG00000172139|SLC9C1	0.713793	1.70041	-0.680149	-0.745853	-0.708485	-0.27972	1	473	1
474	474	ENSG00000181449|SOX2	0.653277	1.75916	-0.673793	-0.487446	-0.579529	-0.671667	1	474	1
475	475	ENSG00000103044|HAS3	0.662858	1.48677	-0.012059	-1.4536	-0.381443	-0.302528	1	475	1
476	476	ENSG00000118946|PCDH17	0.696293	1.37895	0.132059	-1.52649	-0.471362	-0.209454	1	476	1
477	477	ENSG00000196504|PRPF40A	0.680303	1.45879	0.0371947	-1.41978	-0.608248	-0.148266	1	477	1
478	478	ENSG00000108424|KPNB1	0.792758	1.38657	-0.237677	-1.43926	-0.563289	0.0609028	1	478	1
479	479	ENSG00000146278|PNRC1	0.98466	1.3016	-0.293443	-1.44862	-0.314634	-0.229562	1	479	1
480	480	ENSG00000185115|NSMCE3	1.15559	1.13667	0.0500281	-1.37841	-0.534628	-0.429252	1	480	1
481	481	ENSG00000144136|SLC20A1	1.16214	1.00131	0.246126	-1.45503	-0.559598	-0.39495	1	481	1
482	482	ENSG00000174780|SRP72	1.07083	1.04783	0.350474	-1.45374	-0.46483	-0.550558	1	482	1
483	483	ENSG00000105576|TNPO2	1.15497	1.18936	0.120039	-1.14352	-0.491438	-0.829405	1	483	1
484	484	ENSG00000130821|SLC6A8	1.19035	1.19612	0.0915451	-1.0764	-0.661324	-0.740278	1	484	1
485	485	ENSG00000066135|KDM4A	1.11057	1.13677	0.307902	-1.21823	-0.639312	-0.697697	1	485	1
486	486	ENSG00000204599|TRIM39	1.10904	1.21436	0.135853	-1.2254	-0.700869	-0.532986	1	486	1
487	487	ENSG00000105327|BBC3	0.965171	1.35016	0.0720021	-1.13221	-0.919742	-0.335382	1	487	1
488	488	ENSG00000170549|IRX1	1.01512	1.2618	0.161964	-1.2104	-0.87067	-0.357806	1	488	1
489	489	ENSG00000073536|NLE1	0.999229	1.24081	0.340072	-0.988249	-1.02248	-0.569383	1	489	1
490	490	ENSG00000101811|CSTF2	1.06285	1.2742	0.171459	-0.899921	-1.04273	-0.56587	1	490	1
491	491	ENSG00000110651|CD81	1.25163	1.17984	-0.0926271	-1.14303	-0.673166	-0.522646	1	491	1
492	492	ENSG00000169710|FASN	1.31078	1.12058	-0.0272446	-0.953982	-0.903769	-0.54637	1	492	1
493	493	ENSG00000041802|LSG1	1.31586	0.995199	-0.03153	-1.26182	-0.797841	-0.219871	1	493	1
494	494	ENSG00000160767|FAM189B	1.20001	1.15943	-0.0776866	-1.09706	-0.982456	-0.202231	1	494	1
495	495	ENSG00000173013|CCDC96	1.22911	1.17666	-0.128849	-1.09896	-0.894445	-0.28352	1	495	1
496	496	ENSG00000049656|CLPTM1L	1.73885	0.182833	0.201147	-1.13005	-0.2388	-0.753977	1	496	1
497	497	ENSG00000197921|HES5	1.68573	0.232621	0.0262304	-1.2376	0.0477124	-0.754695	1	497	1
498	498	ENSG00000197451|HNRNPAB	1.49644	0.527153	-0.0626126	-1.12118	0.239331	-1.07913	1	498	1
499	499	ENSG00000148604|RGR	1.6255	0.448904	-0.262055	-0.832344	0.186215	-1.16622	1	499	1
500	500	ENSG00000164105|SAP30	1.65162	0.282918	-0.021273	-0.956511	0.161559	-1.11832	1	500	1
501	501	ENSG00000125285|SOX21	1.7034	0.595294	-0.627154	-1.01686	-0.101056	-0.553627	1	501	1
502	502	ENSG00000106003|LFNG	1.78864	0.496579	-0.202116	-0.779723	-0.818931	-0.484453	1	502	1
503	503	ENSG00000198417|MT1F	1.83952	0.320914	-0.0876523	-0.837636	-0.760887	-0.474257	1	503	1
504	504	ENSG00000040608|RTN4R	1.82472	0.418354	-0.203651	-0.879564	-0.518119	-0.641738	1	504	1
505	505	ENSG00000113532|ST8SIA4	1.86034	0.311629	-0.299947	-0.961732	-0.535242	-0.375044	1	505	1
506	506	ENSG00000101189|MRGBP	1.45322	1.03098	-0.236947	-0.750172	-0.955527	-0.54156	1	506	1
507	507	ENSG00000166173|LARP6	1.43316	1.09325	-0.404672	-0.647515	-0.93857	-0.535648	1	507	1
508	508	ENSG00000011451|WIZ	1.5064	0.994411	-0.4429	-0.565627	-0.509127	-0.983157	1	508	1
509	509	ENSG00000142949|PTPRF	1.4826	0.983417	-0.272665	-0.526971	-0.61599	-1.05039	1	509	1
510	510	ENSG00000050820|BCAR1	1.34159	1.21533	-0.405277	-0.616122	-0.780581	-0.754943	1	510	1
511	511	ENSG00000140320|BAHD1	1.37316	1.18543	-0.616831	-0.633438	-0.46493	-0.84339	1	511	1
512	512	ENSG00000118900|UBN1	0.85764	1.55457	-0.107845	-0.890084	-0.559151	-0.855129	1	512	1
513	513	ENSG00000175264|CHST1	0.986372	1.44618	-0.0908417	-0.810237	-0.544162	-0.987312	1	513	1
514	514	ENSG00000261236|BOP1	0.91975	1.51079	-0.130659	-0.807698	-0.535354	-0.956829	1	514	1
515	515	ENSG00000136444|RSAD1	0.952784	1.5171	-0.230733	-0.852067	-0.536483	-0.850605	1	515	1
516	516	ENSG00000152154|TMEM178A	1.00716	1.49693	-0.303323	-0.83147	-0.575068	-0.794224	1	516	1
517	517	ENSG00000103260|METRN	1.04677	1.40971	-0.0862187	-0.830315	-0.638767	-0.901176	1	517	1
518	518	ENSG00000197380|DACT3	1.136	1.37504	-0.210869	-0.831448	-0.687245	-0.781475	1	518	1
519	519	ENSG00000125744|RTN2	1.1087	1.31862	-0.0123805	-1.04147	-0.642034	-0.731439	1	519	1
520	520	ENSG00000170468|RIOX1	0.999509	1.36827	0.0974018	-1.07151	-0.692871	-0.700798	1	520	1
521	521	ENSG00000171302|CANT1	0.978575	1.3917	0.093929	-0.991271	-0.615273	-0.857655	1	521	1
522	522	ENSG00000238227|TMEM250	1.02167	1.38128	0.067535	-0.875778	-0.746542	-0.848164	1	522	1
523	523	ENSG00000225968|ELFN1	0.992559	1.39784	0.025277	-0.879173	-0.537098	-0.999406	1	523	1
524	524	ENSG00000153253|SCN3A	0.949124	1.39895	0.11905	-0.955141	-0.565474	-0.946509	1	524	1
525	525	ENSG00000171551|ECEL1	0.901447	1.41216	0.141161	-0.979582	-0.486995	-0.988192	1	525	1
526	526	ENSG00000166337|TAF10	1.09696	1.26118	0.132903	-0.885689	-0.562455	-1.0429	1	526	1
527	527	ENSG00000243910|TUBA4B	1.06315	1.25217	0.162567	-1.02534	-0.4355	-1.01704	1	527	1
528	528	ENSG00000140406|TLNRD1	1.14068	1.4076	-0.599746	-0.882935	-0.460427	-0.605176	1	528	1
529	529	ENSG00000108773|KAT2A	1.01378	1.50555	-0.40909	-0.892209	-0.622982	-0.595047	1	529	1
530	530	ENSG00000145191|EIF2B5	1.19172	1.33989	-0.325325	-0.924903	-0.607213	-0.67417	1	530	1
531	531	ENSG00000164292|RHOBTB3	0.965646	1.47924	-0.512345	-1.05177	-0.192628	-0.688148	1	531	1
532	532	ENSG00000100014|SPECC1L	1.00341	1.34062	-0.323937	-1.23234	-0.0318999	-0.755848	1	532	1
533	533	ENSG00000143319|ISG20L2	1.06948	1.35872	-0.358309	-1.00712	-0.142359	-0.920408	1	533	1
534	534	ENSG00000172239|PAIP1	1.45592	0.752385	0.0663501	-1.23882	-0.172467	-0.86336	1	534	1
535	535	ENSG00000106689|LHX2	1.48733	0.584642	0.192892	-1.28957	-0.12006	-0.855237	1	535	1
536	536	ENSG00000180346|TIGD2	1.48474	0.642372	0.176624	-1.18847	-0.159284	-0.955975	1	536	1
537	537	ENSG00000184486|POU3F2	1.40585	0.821125	-0.111911	-1.40578	-0.121133	-0.588153	1	537	1
538	538	ENSG00000174136|RGMB	1.25886	0.827927	-0.0486384	-1.47525	0.161637	-0.72453	1	538	1
539	539	ENSG00000116747|TROVE2	1.35124	0.704598	0.119631	-1.42437	0.0442481	-0.795351	1	539	1
540	540	ENSG00000160221|GATD3A	1.39	0.711573	0.128035	-1.39263	-0.0610903	-0.77589	1	540	1
541	541	ENSG00000177613|CSTF2T	1.48428	0.808215	0.0356023	-1.23187	-0.65779	-0.438443	1	541	1
542	542	ENSG00000188021|UBQLN2	1.38389	0.938011	0.0545426	-1.24511	-0.642319	-0.489019	1	542	1
543	543	ENSG00000179195|ZNF664	1.41291	0.811087	0.233465	-1.21465	-0.473665	-0.769152	1	543	1
544	544	ENSG00000187189|TSPYL4	1.57063	0.720247	0.091919	-1.06628	-0.624029	-0.692489	1	544	1
545	545	ENSG00000116685|KIAA2013	1.47768	0.965756	-0.178063	-1.01732	-0.485608	-0.762448	1	545	1
546	546	ENSG00000124098|FAM210B	1.54161	0.936848	-0.388933	-1.00086	-0.534973	-0.553693	1	546	1
547	547	ENSG00000165821|SALL2	1.67858	0.639858	-0.309475	-1.13891	-0.462966	-0.407094	1	547	1
548	548	ENSG00000063587|ZNF275	1.56912	0.678426	-0.0356717	-1.28093	-0.432219	-0.498726	1	548	1
549	549	ENSG00000100105|PATZ1	1.61773	0.58477	0.0128319	-1.23912	-0.608342	-0.367865	1	549	1
550	550	ENSG00000196642|RABL6	1.28034	0.931135	0.202468	-0.958829	-0.24037	-1.21474	1	550	1
551	551	ENSG00000113369|ARRDC3	1.41252	0.78993	0.142399	-0.931324	-0.209709	-1.20382	1	551	1
552	552	ENSG00000160803|UBQLN4	1.35281	0.858466	0.162421	-1.06569	-0.198257	-1.10975	1	552	1
553	553	ENSG00000018189|RUFY3	1.50968	0.656574	0.217139	-0.889158	-0.337461	-1.15678	1	553	1
554	554	ENSG00000164938|TP53INP1	1.55261	0.623641	0.15571	-1.08045	-0.289799	-0.961706	1	554	1
555	555	ENSG00000077380|DYNC1I2	1.47739	0.610342	0.260915	-1.10141	-0.184397	-1.06283	1	555	1
556	556	ENSG00000087448|KLHL42	1.42428	0.717443	0.2516	-1.10016	-0.23009	-1.06306	1	556	1
557	557	ENSG00000125249|RAP2A	1.52814	0.887723	-0.296416	-0.802476	-0.285861	-1.03111	1	557	1
558	558	ENSG00000150401|DCUN1D2	1.54594	0.847774	-0.135322	-0.87506	-0.417355	-0.965979	1	558	1
559	559	ENSG00000065978|YBX1	1.38941	0.914342	-0.0342664	-0.855716	-0.206535	-1.20724	1	559	1
560	560	ENSG00000183908|LRRC55	1.31115	1.0866	-0.104628	-0.757675	-0.357641	-1.17781	1	560	1
561	561	ENSG00000122741|DCAF10	1.33987	1.06222	-0.120552	-0.881474	-0.309626	-1.09043	1	561	1
562	562	ENSG00000139372|TDG	1.29412	1.05297	0.0107341	-0.863772	-0.326199	-1.16785	1	562	1
563	563	ENSG00000189410|SH2D5	1.08563	1.187	0.137216	-1.04345	-0.252307	-1.11408	1	563	1
564	564	ENSG00000135045|C9orf40	1.22498	1.04674	0.0945492	-1.06439	-0.195709	-1.10617	1	564	1
565	565	ENSG00000170653|ATF7	1.16801	1.02916	0.214402	-1.07003	-0.177924	-1.16362	1	565	1
566	566	ENSG00000188938|FAM120AOS	1.18515	1.15481	0.00869006	-1.12646	-0.260411	-0.96178	1	566	1
567	567	ENSG00000242732|RTL5	1.23493	1.17148	-0.0289262	-1.05123	-0.42108	-0.905175	1	567	1
568	568	ENSG00000186792|HYAL3	1.33957	1.02205	0.0414304	-1.12563	-0.443344	-0.83407	1	568	1
569	569	ENSG00000120685|PROSER1	1.29409	0.965184	0.139366	-1.14929	-0.255196	-0.994152	1	569	1
570	570	ENSG00000157259|GATAD1	1.30706	1.02685	-0.0530701	-1.19767	-0.214997	-0.868176	1	570	1
571	571	ENSG00000163661|PTX3	1.37206	0.976222	-0.035585	-1.13447	-0.287421	-0.890808	1	571	1
572	572	ENSG00000108947|EFNB3	1.58175	0.618068	0.233744	-0.862966	-0.581214	-0.989387	1	572	1
573	573	ENSG00000116014|KISS1R	1.45796	0.801365	0.255421	-0.801375	-0.688014	-1.02536	1	573	1
574	574	ENSG00000183741|CBX6	1.40316	0.750952	0.39588	-0.861087	-0.577229	-1.11168	1	574	1
575	575	ENSG00000127328|RAB3IP	1.39965	0.690439	0.501617	-1.07658	-0.703677	-0.811453	1	575	1
576	576	ENSG00000251493|FOXD1	1.35466	0.82056	0.423279	-1.05048	-0.700857	-0.84717	1	576	1
577	577	ENSG00000068078|FGFR3	1.49402	0.741718	0.276576	-0.977304	-0.704191	-0.830818	1	577	1
578	578	ENSG00000107105|ELAVL2	1.5409	0.652678	0.315773	-0.859174	-0.83502	-0.815159	1	578	1
579	579	ENSG00000172432|GTPBP2	1.45776	0.719999	0.391054	-0.814727	-0.850362	-0.903724	1	579	1
580	580	ENSG00000164929|BAALC	1.36729	0.823075	0.41435	-0.880993	-0.762752	-0.960964	1	580	1
581	581	ENSG00000166971|AKTIP	1.43151	0.801449	0.329813	-0.878295	-0.77311	-0.911365	1	581	1
582	582	ENSG00000008838|MED24	1.35375	0.913327	0.300299	-0.705104	-0.854314	-1.00796	1	582	1
583	583	ENSG00000131899|LLGL1	1.38583	0.886126	0.276666	-0.762027	-0.749975	-1.03662	1	583	1
584	584	ENSG00000165802|NSMF	1.35341	0.984016	0.1861	-0.840428	-0.695558	-0.987541	1	584	1
585	585	ENSG00000115902|SLC1A4	1.31158	0.998084	0.228136	-0.995787	-0.611235	-0.930777	1	585	1
586	586	ENSG00000213380|COG8	1.32435	1.0197	0.189505	-0.928238	-0.702072	-0.903248	1	586	1
587	587	ENSG00000130479|MAP1S	1.25163	0.982547	0.396784	-0.923465	-0.850891	-0.856608	1	587	1
588	588	ENSG00000119782|FKBP1B	1.18596	1.11407	0.290046	-0.948173	-0.717803	-0.924097	1	588	1
589	589	ENSG00000138606|SHF	1.18109	1.03758	0.42008	-0.859594	-0.766292	-1.01286	1	589	1
590	590	ENSG00000174238|PITPNA	1.17008	1.0669	0.387338	-0.891211	-0.714009	-1.01909	1	590	1
591	591	ENSG00000135116|HRK	1.41614	0.975166	0.0802082	-0.797714	-0.833055	-0.840742	1	591	1
592	592	ENSG00000172667|ZMAT3	1.34741	0.994999	0.199916	-0.847566	-0.8518	-0.842955	1	592	1
593	593	ENSG00000124535|WRNIP1	1.32125	1.06838	0.101162	-0.884562	-0.680241	-0.925988	1	593	1
594	594	ENSG00000168066|SF1	1.27945	1.14135	0.052325	-0.847198	-0.718063	-0.907868	1	594	1
595	595	ENSG00000099949|LZTR1	1.29463	1.15061	-0.00258554	-0.899968	-0.780082	-0.762602	1	595	1
596	596	ENSG00000270885|RASL10B	1.42568	1.00061	-0.00708243	-0.906148	-0.743238	-0.76983	1	596	1
597	597	ENSG00000104833|TUBB4A	1.26216	1.07698	0.126263	-0.767955	-0.531913	-1.16553	1	597	1
598	598	ENSG00000197111|PCBP2	1.21537	1.16432	0.0582421	-0.874305	-0.484342	-1.07928	1	598	1
599	599	ENSG00000154265|ABCA5	1.26894	1.05524	0.188321	-0.650614	-0.725766	-1.13612	1	599	1
600	600	ENSG00000105063|PPP6R1	1.1947	1.10935	0.238861	-0.796847	-0.622366	-1.12369	1	600	1
601	601	ENSG00000175467|SART1	1.19448	1.17882	0.120348	-0.773571	-0.646266	-1.07381	1	601	1
602	602	ENSG00000167685|ZNF444	0.298503	1.84132	-0.112625	-0.6599	-0.421411	-0.945887	1	602	1
603	603	ENSG00000204227|RING1	0.279016	1.83915	-0.135164	-0.678675	-0.328009	-0.976321	1	603	1
604	604	ENSG00000188011|RTP5	0.284126	1.88768	-0.227178	-0.574763	-0.551271	-0.81859	1	604	1
605	605	ENSG00000133247|KMT5C	0.121263	1.9267	-0.229734	-0.505897	-0.428903	-0.883431	1	605	1
606	606	ENSG00000258429|PDF	0.102207	1.9331	-0.137702	-0.611065	-0.515381	-0.771161	1	606	1
607	607	ENSG00000173825|TIGD3	0.010501	1.95895	-0.303282	-0.653389	-0.250792	-0.761985	1	607	1
608	608	ENSG00000276345|AC004556.1	0.0622715	1.90071	-0.114947	-0.798988	-0.223221	-0.825828	1	608	1
609	609	ENSG00000104723|TUSC3	0.400917	1.82388	-0.335169	-0.853992	-0.258171	-0.777462	1	609	1
610	610	ENSG00000153574|RPIA	0.318751	1.86079	-0.435237	-0.695684	-0.198235	-0.850385	1	610	1
611	611	ENSG00000185347|TEDC1	0.331214	1.8177	-0.35232	-0.697749	-0.11842	-0.980429	1	611	1
612	612	ENSG00000164576|SAP30L	0.798778	1.64043	-0.347447	-0.797446	-0.451324	-0.842986	1	612	1
613	613	ENSG00000162980|ARL5A	0.626147	1.71228	-0.237536	-0.865713	-0.385937	-0.849241	1	613	1
614	614	ENSG00000237412|PRSS56	0.596759	1.73654	-0.263067	-0.885683	-0.401103	-0.783445	1	614	1
615	615	ENSG00000099804|CDC34	0.648464	1.57964	0.0391947	-1.0359	-0.261127	-0.970266	1	615	1
616	616	ENSG00000137714|FDX1	0.662998	1.56452	0.0273508	-0.95526	-0.228522	-1.07109	1	616	1
617	617	ENSG00000027847|B4GALT7	0.518931	1.67616	0.0325949	-0.830685	-0.341921	-1.05508	1	617	1
618	618	ENSG00000101084|RAB5IF	0.484643	1.67947	-0.0264309	-0.860268	-0.198339	-1.07908	1	618	1
619	619	ENSG00000130511|SSBP4	0.56826	1.6411	0.0832704	-0.801148	-0.411947	-1.07954	1	619	1
620	620	ENSG00000159840|ZYX	0.608457	1.63595	0.0746502	-0.800265	-0.481847	-1.03695	1	620	1
621	621	ENSG00000154370|TRIM11	0.493452	1.68429	0.108124	-0.847601	-0.440515	-0.997749	1	621	1
622	622	ENSG00000101457|DNTTIP1	0.596902	1.64305	0.0671726	-0.899058	-0.439488	-0.968575	1	622	1
623	623	ENSG00000091592|NLRP1	0.53754	1.67884	0.0888932	-0.847898	-0.500938	-0.956437	1	623	1
624	624	ENSG00000103254|FAM173A	0.588553	1.63407	0.132827	-0.858708	-0.515675	-0.981064	1	624	1
625	625	ENSG00000165724|ZMYND19	0.599447	1.67037	-0.0717076	-0.975893	-0.340821	-0.881396	1	625	1
626	626	ENSG00000099960|SLC7A4	0.520324	1.68266	0.085968	-0.922676	-0.453089	-0.913187	1	626	1
627	627	ENSG00000104853|CLPTM1	0.561517	1.67138	0.0697932	-0.964054	-0.494745	-0.843889	1	627	1
628	628	ENSG00000116754|SRSF11	0.321961	1.79973	-0.0669285	-1.05801	-0.362967	-0.633785	1	628	1
629	629	ENSG00000163362|INAVA	0.231801	1.82563	-0.0118563	-0.989232	-0.332342	-0.723999	1	629	1
630	630	ENSG00000076924|XAB2	0.327628	1.76404	0.0873958	-1.08007	-0.512501	-0.586495	1	630	1
631	631	ENSG00000124608|AARS2	0.287013	1.80278	0.0997666	-0.928067	-0.612244	-0.649245	1	631	1
632	632	ENSG00000148300|REXO4	0.423236	1.81136	-0.179218	-0.822288	-0.427695	-0.805392	1	632	1
633	633	ENSG00000214026|MRPL23	0.376134	1.80243	-0.10139	-0.832044	-0.365647	-0.879484	1	633	1
634	634	ENSG00000071894|CPSF1	0.419688	1.7867	-0.0487413	-0.806326	-0.49404	-0.857285	1	634	1
635	635	ENSG00000177383|MAGEF1	0.541597	1.72892	-0.0669623	-0.863854	-0.483616	-0.856087	1	635	1
636	636	ENSG00000008128|CDK11A	0.229231	1.8362	0.0751096	-0.73645	-0.556955	-0.847132	1	636	1
637	637	ENSG00000213015|ZNF580	0.265703	1.83649	-0.00620821	-0.895587	-0.469605	-0.730794	1	637	1
638	638	ENSG00000116473|RAP1A	0.380622	1.61521	0.251077	-1.15966	-0.191986	-0.895272	1	638	1
639	639	ENSG00000160256|FAM207A	0.339191	1.70986	0.202561	-1.01315	-0.367321	-0.871144	1	639	1
640	640	ENSG00000254402|LRRC24	0.217095	1.72236	0.241767	-1.02647	-0.255263	-0.899489	1	640	1
641	641	ENSG00000129968|ABHD17A	0.277958	1.73527	0.015621	-0.980308	-0.0767118	-0.971828	1	641	1
642	642	ENSG00000169840|GSX1	0.197312	1.7552	0.0970057	-1.00708	-0.125374	-0.917062	1	642	1
643	643	ENSG00000100836|PABPN1	0.37162	1.78549	-0.154823	-0.943713	-0.213795	-0.844779	1	643	1
644	644	ENSG00000130204|TOMM40	0.287716	1.79607	-0.0253581	-0.90019	-0.255392	-0.902848	1	644	1
645	645	ENSG00000129245|FXR2	0.516289	1.80431	-0.364704	-0.867495	-0.540324	-0.54808	1	645	1
646	646	ENSG00000081138|CDH7	0.342991	1.87871	-0.27918	-0.75295	-0.581188	-0.608387	1	646	1
647	647	ENSG00000116035|VAX2	0.507991	1.79567	-0.237065	-0.797391	-0.534501	-0.734704	1	647	1
648	648	ENSG00000114019|AMOTL2	0.352282	1.8385	-0.300185	-0.995366	-0.531914	-0.363322	1	648	1
649	649	ENSG00000260691|ANKRD20A1	0.428606	1.81248	-0.256848	-0.854459	-0.785043	-0.344737	1	649	1
650	650	ENSG00000214562|NUTM2D	0.278212	1.73568	0.14896	-1.04666	-0.849124	-0.267071	1	650	1
651	651	ENSG00000163273|NPPC	0.288219	1.73907	0.144889	-1.15569	-0.606551	-0.409941	1	651	1
652	652	ENSG00000166823|MESP1	0.270666	1.74645	0.161849	-1.09789	-0.714828	-0.366246	1	652	1
653	653	ENSG00000143373|ZNF687	0.627036	1.65269	-0.117016	-1.09861	-0.742575	-0.321534	1	653	1
654	654	ENSG00000006047|YBX2	0.626779	1.60203	0.0918807	-1.01063	-0.931353	-0.378701	1	654	1
655	655	ENSG00000108592|FTSJ3	0.602183	1.55454	0.216323	-1.15731	-0.826495	-0.389245	1	655	1
656	656	ENSG00000105409|ATP1A3	0.889448	1.44496	0.0310581	-1.19427	-0.648353	-0.522843	1	656	1
657	657	ENSG00000130177|CDC16	0.843118	1.5716	-0.169282	-1.01541	-0.576031	-0.653997	1	657	1
658	658	ENSG00000016082|ISL1	0.650627	1.55044	0.189278	-1.15499	-0.47632	-0.759035	1	658	1
659	659	ENSG00000171055|FEZ2	0.733542	1.50798	0.0856283	-1.24362	-0.388521	-0.695008	1	659	1
660	660	ENSG00000278535|DHRS11	0.725702	1.45848	0.213644	-1.26839	-0.400499	-0.728939	1	660	1
661	661	ENSG00000111667|USP5	0.609773	1.64635	-0.0323723	-1.16181	-0.492349	-0.569598	1	661	1
662	662	ENSG00000137203|TFAP2A	0.670802	1.54251	0.0324351	-1.31026	-0.555108	-0.380384	1	662	1
663	663	ENSG00000149577|SIDT2	0.538055	1.61786	0.0678706	-1.28069	-0.513574	-0.429524	1	663	1
664	664	ENSG00000174721|FGFBP3	0.748158	1.47589	0.248644	-1.1487	-0.61619	-0.707803	1	664	1
665	665	ENSG00000103202|NME4	0.703864	1.43152	0.398607	-1.1384	-0.5824	-0.813189	1	665	1
666	666	ENSG00000165152|TMEM246	0.73405	1.45387	0.329691	-1.08632	-0.584612	-0.846676	1	666	1
667	667	ENSG00000140988|RPS2	0.536939	1.61507	0.259608	-1.05845	-0.67668	-0.676483	1	667	1
668	668	ENSG00000241697|TMEFF1	0.55796	1.6337	0.209986	-0.943569	-0.623482	-0.834597	1	668	1
669	669	ENSG00000100280|AP1B1	0.608135	1.62458	0.141425	-1.00689	-0.577764	-0.789483	1	669	1
670	670	ENSG00000204673|AKT1S1	0.60388	1.61805	0.141736	-1.05478	-0.536141	-0.772746	1	670	1
671	671	ENSG00000104852|SNRNP70	0.522384	1.68391	0.150559	-0.737534	-0.726458	-0.89286	1	671	1
672	672	ENSG00000178467|P4HTM	0.61232	1.6323	0.162561	-0.76894	-0.795976	-0.84226	1	672	1
673	673	ENSG00000149527|PLCH2	0.706436	1.62006	0.0445817	-0.7766	-0.790975	-0.803503	1	673	1
674	674	ENSG00000181045|SLC26A11	0.626079	1.60981	0.191755	-0.708263	-0.859632	-0.859749	1	674	1
675	675	ENSG00000187961|KLHL17	0.676351	1.5581	0.239377	-0.716251	-0.88081	-0.876769	1	675	1
676	676	ENSG00000161013|MGAT4B	0.388041	1.69452	0.291648	-0.82795	-0.850681	-0.695574	1	676	1
677	677	ENSG00000141232|TOB1	0.517356	1.5998	0.351312	-0.90732	-0.718445	-0.842707	1	677	1
678	678	ENSG00000205929|C21orf62	0.535553	1.5686	0.397022	-0.83367	-0.763814	-0.903686	1	678	1
679	679	ENSG00000235961|PNMA6A	1.04411	1.39925	-0.319011	-0.661742	-0.317391	-1.14522	1	679	1
680	680	ENSG00000166924|NYAP1	0.970901	1.45106	-0.357924	-0.767422	-0.204384	-1.09223	1	680	1
681	681	ENSG00000186222|BLOC1S4	0.951404	1.50044	-0.342177	-0.734046	-0.340349	-1.03527	1	681	1
682	682	ENSG00000198355|PIM3	0.95131	1.49442	-0.338178	-0.73549	-0.32192	-1.05014	1	682	1
683	683	ENSG00000110900|TSPAN11	1.07178	1.3075	-0.312268	-0.760484	-0.0999308	-1.2066	1	683	1
684	684	ENSG00000168286|THAP11	0.918699	1.37431	-0.271479	-0.744701	0.00339691	-1.28022	1	684	1
685	685	ENSG00000135097|MSI1	0.843155	1.45965	-0.224745	-0.832019	-0.0575797	-1.18846	1	685	1
686	686	ENSG00000167535|CACNB3	0.89739	1.39019	-0.114835	-0.819286	-0.101515	-1.25194	1	686	1
687	687	ENSG00000126934|MAP2K2	0.992192	1.3863	-0.0855982	-1.04896	-0.296081	-0.947846	1	687	1
688	688	ENSG00000170604|IRF2BP1	0.860225	1.45938	-0.0619462	-1.08033	-0.223822	-0.953507	1	688	1
689	689	ENSG00000168772|CXXC4	0.703872	1.61436	-0.280861	-0.88789	-0.144318	-1.00516	1	689	1
690	690	ENSG00000108312|UBTF	0.852327	1.50792	-0.321648	-1.03782	-0.101374	-0.899397	1	690	1
691	691	ENSG00000214309|MBLAC1	0.745469	1.53412	-0.315698	-0.98806	0.0310787	-1.00691	1	691	1
692	692	ENSG00000119048|UBE2B	0.521486	1.50907	0.145149	-0.852208	-0.0184747	-1.30502	1	692	1
693	693	ENSG00000197444|OGDHL	0.497127	1.47187	0.0954818	-0.750234	0.10146	-1.4157	1	693	1
694	694	ENSG00000122756|CNTFR	0.684852	1.4327	-0.126236	-0.707893	0.112515	-1.39594	1	694	1
695	695	ENSG00000160959|LRRC14	0.65213	1.46023	0.00999072	-0.638195	-0.0588206	-1.42534	1	695	1
696	696	ENSG00000176894|PXMP2	0.639225	1.46603	-0.0321398	-0.670054	0.00834835	-1.41141	1	696	1
697	697	ENSG00000094916|CBX5	0.891359	1.32926	-0.198795	-1.0887	0.157304	-1.09042	1	697	1
698	698	ENSG00000168522|FNTA	0.733645	1.45189	-0.108633	-1.02252	0.0813296	-1.1357	1	698	1
699	699	ENSG00000215012|RTL10	0.747003	1.43328	-0.180794	-0.891892	0.134003	-1.2416	1	699	1
700	700	ENSG00000100379|KCTD17	0.732364	1.39991	0.0440462	-1.16802	0.0568084	-1.06511	1	700	1
701	701	ENSG00000123080|CDKN2C	0.819997	1.37688	-0.037039	-1.07607	0.0434401	-1.12721	1	701	1
702	702	ENSG00000138668|HNRNPD	0.805429	1.44263	-0.0649303	-1.08177	-0.056125	-1.04523	1	702	1
703	703	ENSG00000145860|RNF145	0.644196	1.4651	0.209763	-1.00621	-0.146393	-1.16646	1	703	1
704	704	ENSG00000138111|MFSD13A	0.698184	1.42493	0.17275	-0.938956	-0.108357	-1.24855	1	704	1
705	705	ENSG00000175416|CLTB	0.691943	1.44687	0.0849592	-0.896387	-0.0570282	-1.27036	1	705	1
706	706	ENSG00000100813|ACIN1	0.420603	1.6865	0.140823	-0.738801	-0.384139	-1.12498	1	706	1
707	707	ENSG00000175137|SH3BP5L	0.468067	1.68248	0.0949326	-0.7031	-0.412476	-1.1299	1	707	1
708	708	ENSG00000100151|PICK1	0.362348	1.71508	0.170249	-0.697781	-0.450745	-1.09915	1	708	1
709	709	ENSG00000240857|RDH14	0.374063	1.73979	0.124083	-0.693919	-0.503423	-1.0406	1	709	1
710	710	ENSG00000172247|C1QTNF4	0.396017	1.75317	0.103733	-0.721444	-0.584618	-0.946858	1	710	1
711	711	ENSG00000148290|SURF1	0.510156	1.71785	-0.00496339	-0.70527	-0.494777	-1.02299	1	711	1
712	712	ENSG00000175602|CCDC85B	0.444095	1.74122	0.013905	-0.629096	-0.518278	-1.05184	1	712	1
713	713	ENSG00000131591|C1orf159	0.361559	1.77836	-0.0838223	-0.748486	-0.276614	-1.03099	1	713	1
714	714	ENSG00000134072|CAMK1	0.382212	1.74131	-0.108863	-0.678057	-0.190359	-1.14625	1	714	1
715	715	ENSG00000068971|PPP2R5B	0.511155	1.7566	-0.227262	-0.770896	-0.317621	-0.951978	1	715	1
716	716	ENSG00000107262|BAG1	0.571299	1.70072	-0.206767	-0.703332	-0.283251	-1.07867	1	716	1
717	717	ENSG00000105767|CADM4	0.483048	1.59941	0.143233	-0.686036	-0.254015	-1.28564	1	717	1
718	718	ENSG00000162585|FAAP20	0.457329	1.62056	0.175324	-0.706034	-0.305341	-1.24184	1	718	1
719	719	ENSG00000116786|PLEKHM2	0.488564	1.64567	0.117005	-0.608084	-0.421816	-1.22134	1	719	1
720	720	ENSG00000158806|NPM2	0.489254	1.64562	0.0287405	-0.590954	-0.303703	-1.26896	1	720	1
721	721	ENSG00000130222|GADD45G	0.577948	1.59343	0.154031	-0.756802	-0.396878	-1.17173	1	721	1
722	722	ENSG00000159210|SNF8	0.605244	1.58923	0.111058	-0.750267	-0.375529	-1.17973	1	722	1
723	723	ENSG00000105325|FZR1	0.665188	1.5185	0.0648297	-0.650625	-0.27572	-1.32217	1	723	1
724	724	ENSG00000262919|CCNQ	0.686704	1.52929	0.0362218	-0.718197	-0.269015	-1.265	1	724	1
725	725	ENSG00000142444|TIMM29	0.594233	1.58163	0.0267	-0.603388	-0.298653	-1.30052	1	725	1
726	726	ENSG00000197183|NOL4L	0.653007	1.58045	-0.0139732	-0.649091	-0.326308	-1.24409	1	726	1
727	727	ENSG00000127554|GFER	0.382398	1.64257	0.243131	-0.746727	-0.323795	-1.19758	1	727	1
728	728	ENSG00000167977|KCTD5	0.413601	1.63889	0.245508	-0.764787	-0.365106	-1.16811	1	728	1
729	729	ENSG00000078808|SDF4	0.46643	1.64216	0.204294	-0.832006	-0.383155	-1.09772	1	729	1
730	730	ENSG00000130748|TMEM160	0.477719	1.60717	0.238681	-0.816993	-0.347415	-1.15916	1	730	1
731	731	ENSG00000250571|GLI4	0.44733	1.59041	0.268828	-0.972484	-0.241252	-1.09283	1	731	1
732	732	ENSG00000184207|PGP	0.502967	1.57799	0.182794	-0.885854	-0.194208	-1.18369	1	732	1
733	733	ENSG00000188130|MAPK12	0.497682	1.50736	0.303057	-0.903851	-0.161102	-1.24315	1	733	1
734	734	ENSG00000040633|PHF23	0.633277	1.53012	0.280581	-1.06046	-0.471133	-0.912383	1	734	1
735	735	ENSG00000115310|RTN4	0.720966	1.47504	0.285783	-0.98657	-0.491038	-1.00418	1	735	1
736	736	ENSG00000143889|HNRNPLL	0.703196	1.54191	0.119483	-1.03309	-0.382864	-0.948635	1	736	1
737	737	ENSG00000168061|SAC3D1	0.645372	1.59473	0.134995	-0.930554	-0.484776	-0.95977	1	737	1
738	738	ENSG00000149923|PPP4C	0.658101	1.46046	0.326597	-0.923452	-0.362893	-1.15881	1	738	1
739	739	ENSG00000167553|TUBA1C	0.64849	1.46805	0.348063	-0.903432	-0.414294	-1.14687	1	739	1
740	740	ENSG00000022840|RNF10	0.538601	1.53159	0.315693	-0.952188	-0.310606	-1.12309	1	740	1
741	741	ENSG00000105771|SMG9	0.530866	1.53843	0.325844	-0.895922	-0.350383	-1.14883	1	741	1
742	742	ENSG00000148334|PTGES2	0.53117	1.51716	0.445404	-0.932375	-0.526263	-1.0351	1	742	1
743	743	ENSG00000168237|GLYCTK	0.603871	1.5101	0.393582	-0.939299	-0.574313	-0.993939	1	743	1
744	744	ENSG00000135632|SMYD5	0.51382	1.60847	0.264186	-0.868901	-0.465083	-1.05249	1	744	1
745	745	ENSG00000137409|MTCH1	0.582465	1.54573	0.292884	-0.81133	-0.464468	-1.14528	1	745	1
746	746	ENSG00000094631|HDAC6	0.909606	1.32589	0.322925	-0.935906	-0.568181	-1.05433	1	746	1
747	747	ENSG00000116954|RRAGC	0.870407	1.38909	0.267571	-0.957507	-0.569562	-1	1	747	1
748	748	ENSG00000006118|TMEM132A	0.886463	1.4065	0.208287	-0.849525	-0.594824	-1.0569	1	748	1
749	749	ENSG00000130558|OLFM1	0.967782	1.31224	0.273509	-0.833478	-0.644824	-1.07523	1	749	1
750	750	ENSG00000123159|GIPC1	0.813609	1.48198	0.177278	-0.81995	-0.636772	-1.01615	1	750	1
751	751	ENSG00000185813|PCYT2	0.737982	1.49741	0.254486	-0.843532	-0.621193	-1.02516	1	751	1
752	752	ENSG00000153902|LGI4	0.809341	1.41341	0.331034	-0.960083	-0.645233	-0.948464	1	752	1
753	753	ENSG00000181830|SLC35C1	0.766878	1.43154	0.33459	-0.844094	-0.607881	-1.08103	1	753	1
754	754	ENSG00000182944|EWSR1	0.856411	1.374	0.330248	-0.867096	-0.642227	-1.05134	1	754	1
755	755	ENSG00000110917|MLEC	0.791405	1.35183	0.370451	-0.975507	-0.398692	-1.13949	1	755	1
756	756	ENSG00000135469|COQ10A	0.773361	1.36554	0.381875	-0.947622	-0.428819	-1.14434	1	756	1
757	757	ENSG00000106636|YKT6	0.706481	1.42086	0.327896	-0.97177	-0.335632	-1.14784	1	757	1
758	758	ENSG00000147164|SNX12	0.685414	1.3824	0.419847	-0.963079	-0.342054	-1.18253	1	758	1
759	759	ENSG00000099821|POLRMT	0.827858	1.41276	0.197251	-0.872419	-0.399711	-1.16574	1	759	1
760	760	ENSG00000102225|CDK16	0.818563	1.34035	0.340528	-0.892715	-0.397339	-1.20939	1	760	1
761	761	ENSG00000159363|ATP13A2	0.82655	1.36857	0.263145	-0.843313	-0.383576	-1.23138	1	761	1
762	762	ENSG00000100075|SLC25A1	0.641254	1.46436	0.37148	-0.809141	-0.472923	-1.19503	1	762	1
763	763	ENSG00000269403|AC008750.8	0.677492	1.45732	0.370472	-0.840417	-0.526028	-1.13884	1	763	1
764	764	ENSG00000104866|PPP1R37	0.733556	1.43234	0.289916	-0.720454	-0.47945	-1.25591	1	764	1
765	765	ENSG00000161204|ABCF3	0.732131	1.40494	0.321728	-0.785235	-0.406891	-1.26667	1	765	1
766	766	ENSG00000068001|HYAL2	0.728569	1.57005	-0.0626073	-0.826486	-0.302431	-1.1071	1	766	1
767	767	ENSG00000155287|SLC25A28	0.652762	1.56119	0.00546963	-0.791003	-0.218901	-1.20952	1	767	1
768	768	ENSG00000188042|ARL4C	0.765617	1.53142	-0.16436	-0.877449	-0.13576	-1.11947	1	768	1
769	769	ENSG00000172354|GNB2	0.786365	1.50005	-0.0744509	-0.821814	-0.202985	-1.18716	1	769	1
770	770	ENSG00000224109|CENPVL3	0.756191	1.49179	-0.0869771	-0.776131	-0.129466	-1.2554	1	770	1
771	771	ENSG00000101945|SUV39H1	0.816117	1.44883	0.0932291	-0.768477	-0.363555	-1.22614	1	771	1
772	772	ENSG00000160813|PPP1R35	0.815419	1.42598	0.116673	-0.82135	-0.30323	-1.23349	1	772	1
773	773	ENSG00000162755|KLHDC9	0.813457	1.44634	0.0340534	-0.826675	-0.240878	-1.2263	1	773	1
774	774	ENSG00000166188|ZNF319	0.875024	1.38479	0.0630331	-0.757505	-0.275834	-1.28951	1	774	1
775	775	ENSG00000051009|FAM160A2	0.792098	1.52865	-0.0400061	-0.677713	-0.420698	-1.18234	1	775	1
776	776	ENSG00000165804|ZNF219	0.800902	1.52092	-0.146251	-0.662271	-0.287448	-1.22586	1	776	1
777	777	ENSG00000051128|HOMER3	0.835906	1.57272	-0.162435	-0.642842	-0.574914	-1.02843	1	777	1
778	778	ENSG00000111364|DDX55	0.722467	1.61108	-0.109392	-0.54193	-0.556639	-1.12559	1	778	1
779	779	ENSG00000100422|CERK	0.706397	1.66033	-0.12958	-0.751564	-0.570768	-0.914816	1	779	1
780	780	ENSG00000103510|KAT8	0.693138	1.64515	-0.156687	-0.692246	-0.42828	-1.06107	1	780	1
781	781	ENSG00000187531|SIRT7	0.581779	1.70872	-0.13614	-0.628672	-0.476324	-1.04936	1	781	1
782	782	ENSG00000165782|PIP4P1	0.65869	1.61441	0.0204004	-0.675635	-0.497367	-1.1205	1	782	1
783	783	ENSG00000063245|EPN1	0.704531	1.54611	0.128482	-0.612998	-0.599048	-1.16707	1	783	1
784	784	ENSG00000141582|CBX4	0.764363	1.53057	0.0667242	-0.63047	-0.5718	-1.15939	1	784	1
785	785	ENSG00000187866|FAM122A	0.857972	1.49119	0.0572964	-0.78421	-0.580759	-1.04149	1	785	1
786	786	ENSG00000240771|ARHGEF25	0.775831	1.51593	0.0810916	-0.849845	-0.436361	-1.08665	1	786	1
787	787	ENSG00000171533|MAP6	0.752181	1.22526	0.0690595	-1.41379	0.287481	-0.920193	1	787	1
788	788	ENSG00000185920|PTCH1	0.990199	1.17942	-0.276179	-1.27769	0.296336	-0.912078	1	788	1
789	789	ENSG00000133703|KRAS	0.698246	1.44513	-0.183208	-1.38973	0.0997825	-0.670213	1	789	1
790	790	ENSG00000168876|ANKRD49	0.832439	1.47492	-0.159032	-1.26008	-0.195072	-0.693174	1	790	1
791	791	ENSG00000169718|DUS1L	0.587654	1.58395	-0.0477999	-1.23723	-0.111834	-0.774739	1	791	1
792	792	ENSG00000168913|ENHO	0.413507	1.59665	-0.218434	-1.17881	0.265643	-0.878549	1	792	1
793	793	ENSG00000187796|CARD9	0.538055	1.68885	-0.395675	-1.08056	-0.0201166	-0.730557	1	793	1
794	794	ENSG00000174307|PHLDA3	0.248288	1.56007	0.368021	-1.41561	-0.185766	-0.57501	1	794	1
795	795	ENSG00000205250|E2F4	0.394823	1.59108	0.189594	-1.33228	-0.151273	-0.691937	1	795	1
796	796	ENSG00000170515|PA2G4	0.328325	1.56752	0.463904	-1.23252	-0.382716	-0.744511	1	796	1
797	797	ENSG00000213213|CCDC183	0.225928	1.52784	0.534618	-1.2386	-0.175829	-0.873962	1	797	1
798	798	ENSG00000205726|ITSN1	0.530878	1.43647	0.357213	-1.47051	-0.424287	-0.429765	1	798	1
799	799	ENSG00000142875|PRKACB	0.695939	1.22136	0.492034	-1.49726	-0.206906	-0.70517	1	799	1
800	800	ENSG00000079616|KIF22	0.562567	1.3118	0.522902	-1.43231	-0.189078	-0.775886	1	800	1
801	801	ENSG00000109881|CCDC34	0.517932	1.36356	0.537715	-1.42193	-0.319568	-0.67771	1	801	1
802	802	ENSG00000115884|SDC1	0.0706033	1.51716	0.32815	-1.34276	0.269446	-0.842594	1	802	1
803	803	ENSG00000055813|CCDC85A	0.0469688	1.64665	0.40866	-1.09698	-0.0495311	-0.955773	1	803	1
804	804	ENSG00000161939|RNASEK-C17orf49	0.106144	1.65869	0.294193	-1.02556	0.0148454	-1.04831	1	804	1
805	805	ENSG00000106477|CEP41	0.548687	1.43919	0.235885	-1.13125	0.0434523	-1.13597	1	805	1
806	806	ENSG00000205060|SLC35B4	0.665319	1.30323	0.270911	-1.15642	0.114896	-1.19793	1	806	1
807	807	ENSG00000071994|PDCD2	0.771504	1.3162	0.184319	-1.31861	-0.00489953	-0.948512	1	807	1
808	808	ENSG00000175573|C11orf68	0.651918	1.2868	0.375538	-1.34943	0.0134301	-0.978255	1	808	1
809	809	ENSG00000017797|RALBP1	0.568556	1.55756	0.224215	-1.17699	-0.334854	-0.838489	1	809	1
810	810	ENSG00000178719|GRINA	0.555201	1.48452	0.379743	-1.20175	-0.327651	-0.89006	1	810	1
811	811	ENSG00000101204|CHRNA4	0.724869	1.40263	0.279052	-1.13384	-0.227787	-1.04492	1	811	1
812	812	ENSG00000182512|GLRX5	0.604285	1.51296	0.194836	-1.15582	-0.188617	-0.967639	1	812	1
813	813	ENSG00000159579|RSPRY1	0.503525	1.38006	0.433446	-1.26966	-0.0269457	-1.02042	1	813	1
814	814	ENSG00000215375|MYL5	0.474303	1.41814	0.418708	-1.2182	-0.0428213	-1.05012	1	814	1
815	815	ENSG00000052795|FNIP2	0.425859	1.54908	0.22995	-1.24306	-0.0576267	-0.904209	1	815	1
816	816	ENSG00000104695|PPP2CB	0.514824	1.50749	0.141771	-1.27199	0.0157107	-0.907808	1	816	1
817	817	ENSG00000102984|ZNF821	0.0350438	1.59379	0.368056	-0.651115	0.0319678	-1.37774	1	817	1
818	818	ENSG00000176095|IP6K1	0.0358927	1.64543	0.220268	-0.564638	0.049225	-1.38618	1	818	1
819	819	ENSG00000158669|GPAT4	0.0795281	1.71827	0.311311	-0.785945	-0.18661	-1.13656	1	819	1
820	820	ENSG00000161671|EMC10	0.267951	1.60021	0.334678	-0.798266	-0.140207	-1.26437	1	820	1
821	821	ENSG00000128564|VGF	0.0561382	1.76314	0.00318817	-0.854373	0.103154	-1.07125	1	821	1
822	822	ENSG00000197006|METTL9	0.0714104	1.81665	-0.00367637	-0.67029	-0.102893	-1.11121	1	822	1
823	823	ENSG00000108106|UBE2S	0.325982	1.71683	-0.197305	-0.573741	-0.0156185	-1.25614	1	823	1
824	824	ENSG00000131116|ZNF428	0.155914	1.7145	-0.187957	-0.662589	0.211778	-1.23165	1	824	1
825	825	ENSG00000102125|TAZ	0.404501	1.57689	0.0224881	-0.300335	-0.216145	-1.4874	1	825	1
826	826	ENSG00000198324|PHETA1	0.371956	1.6227	-0.132309	-0.250913	-0.153919	-1.45751	1	826	1
827	827	ENSG00000144583|MARCH4	0.395956	1.4647	0.102944	-0.38578	0.0153535	-1.59318	1	827	1
828	828	ENSG00000196361|ELAVL3	0.525716	1.4189	0.0161694	-0.379683	0.0206165	-1.60172	1	828	1
829	829	ENSG00000172932|ANKRD13D	0.38642	1.48839	0.204964	-0.462691	-0.0764926	-1.54059	1	829	1
830	830	ENSG00000182979|MTA1	0.453208	1.4964	0.104722	-0.585522	0.0148989	-1.4837	1	830	1
831	831	ENSG00000023902|PLEKHO1	0.410584	1.61656	-0.330514	-0.463285	0.13622	-1.36957	1	831	1
832	832	ENSG00000167100|SAMD14	0.344722	1.59204	-0.104597	-0.429984	0.0630069	-1.46519	1	832	1
833	833	ENSG00000110076|NRXN2	0.336182	1.62996	-0.368566	-0.157335	-0.00162674	-1.43861	1	833	1
834	834	ENSG00000168461|RAB31	0.329558	1.73239	-0.279222	-0.315266	-0.169745	-1.29771	1	834	1
835	835	ENSG00000197119|SLC25A29	0.326445	1.70786	-0.249562	-0.313847	-0.129601	-1.34129	1	835	1
836	836	ENSG00000011332|DPF1	0.19727	1.50464	0.00150609	-0.369359	0.246997	-1.58105	1	836	1
837	837	ENSG00000258986|TMEM179	-0.000593897	1.70122	-0.226605	-0.41262	0.281994	-1.3434	1	837	1
838	838	ENSG00000169660|HEXDC	0.490184	1.73614	-0.14365	-0.285375	-1.0177	-0.779596	1	838	1
839	839	ENSG00000274180|NATD1	0.612194	1.65801	-0.121073	-0.286213	-1.08044	-0.782478	1	839	1
840	840	ENSG00000100109|TFIP11	0.69905	1.62614	-0.094298	-0.392399	-1.00318	-0.835315	1	840	1
841	841	ENSG00000151176|PLBD2	0.697918	1.5851	-0.094306	-0.286811	-1.17523	-0.726672	1	841	1
842	842	ENSG00000127220|ABHD8	0.546361	1.77362	-0.343287	-0.386447	-0.685324	-0.904927	1	842	1
843	843	ENSG00000185418|TARSL2	0.481798	1.8064	-0.277036	-0.45847	-0.697611	-0.855085	1	843	1
844	844	ENSG00000180176|TH	0.676114	1.69529	-0.260337	-0.599482	-0.532993	-0.978588	1	844	1
845	845	ENSG00000198858|R3HDM4	0.610032	1.73511	-0.295504	-0.464809	-0.622047	-0.96278	1	845	1
846	846	ENSG00000006025|OSBPL7	0.510065	1.68824	0.078839	-0.504315	-0.71659	-1.05624	1	846	1
847	847	ENSG00000285641|AL358472.6	0.52398	1.71943	-0.032276	-0.46967	-0.746168	-0.995294	1	847	1
848	848	ENSG00000177666|PNPLA2	0.39361	1.69784	0.235279	-0.516724	-0.873657	-0.936354	1	848	1
849	849	ENSG00000060069|CTDP1	0.442596	1.71422	0.0942295	-0.421188	-0.965397	-0.86446	1	849	1
850	850	ENSG00000274897|PANO1	0.476541	1.71015	0.123978	-0.598521	-0.923085	-0.78906	1	850	1
851	851	ENSG00000105373|NOP53	0.133416	1.85623	0.0262529	-0.331176	-0.782676	-0.902042	1	851	1
852	852	ENSG00000197530|MIB2	0.268282	1.86915	-0.0874295	-0.60987	-0.814173	-0.625962	1	852	1
853	853	ENSG00000134086|VHL	0.414267	1.81563	-0.714594	-0.355635	-0.246435	-0.913237	1	853	1
854	854	ENSG00000261678|SCRT1	0.639527	1.63606	-0.652221	-0.301002	-0.149318	-1.17304	1	854	1
855	855	ENSG00000114353|GNAI2	0.587706	1.63546	-0.347432	-0.642922	-0.0307772	-1.20203	1	855	1
856	856	ENSG00000028310|BRD9	0.695691	1.56629	-0.18286	-0.625087	-0.187818	-1.26622	1	856	1
857	857	ENSG00000142208|AKT1	0.613089	1.59675	-0.253238	-0.545621	-0.106639	-1.30434	1	857	1
858	858	ENSG00000149926|FAM57B	0.547802	1.67306	-0.266677	-0.410023	-0.287644	-1.25651	1	858	1
859	859	ENSG00000167395|ZNF646	0.419362	1.76165	-0.14104	-0.529769	-0.381039	-1.12916	1	859	1
860	860	ENSG00000204371|EHMT2	0.44304	1.73536	-0.150202	-0.458055	-0.380595	-1.18955	1	860	1
861	861	ENSG00000105698|USF2	0.504892	1.74389	-0.294251	-0.499168	-0.334522	-1.12084	1	861	1
862	862	ENSG00000176428|VPS37D	0.512798	1.77226	-0.272334	-0.549079	-0.458531	-1.00511	1	862	1
863	863	ENSG00000008382|MPND	0.973471	1.47329	-0.235093	-0.501161	-0.618173	-1.09234	1	863	1
864	864	ENSG00000180900|SCRIB	1.03605	1.43465	-0.23758	-0.62451	-0.55121	-1.0574	1	864	1
865	865	ENSG00000105298|CACTIN	1.11975	1.40445	-0.434988	-0.586097	-0.515704	-0.987416	1	865	1
866	866	ENSG00000185800|DMWD	0.929167	1.52762	-0.46335	-0.462855	-0.446889	-1.08369	1	866	1
867	867	ENSG00000074219|TEAD2	0.846151	1.53007	-0.0253557	-0.647463	-0.661637	-1.04177	1	867	1
868	868	ENSG00000133639|BTG1	0.881878	1.51112	-0.0770188	-0.527852	-0.727395	-1.06073	1	868	1
869	869	ENSG00000025039|RRAGD	0.976247	1.4494	-0.0554169	-0.68785	-0.67573	-1.00665	1	869	1
870	870	ENSG00000152518|ZFP36L2	0.90351	1.52373	-0.0887977	-0.696188	-0.719024	-0.923231	1	870	1
871	871	ENSG00000204052|LRRC73	0.852299	1.54626	-0.0405403	-0.708213	-0.728597	-0.921204	1	871	1
872	872	ENSG00000059122|FLYWCH1	0.720347	1.60449	-0.109424	-0.346006	-0.817086	-1.05232	1	872	1
873	873	ENSG00000126243|LRFN3	0.823142	1.56917	-0.236021	-0.400696	-0.651059	-1.10454	1	873	1
874	874	ENSG00000133250|ZNF414	0.777405	1.42685	-0.0591018	-0.165033	-0.560776	-1.41935	1	874	1
875	875	ENSG00000140474|ULK3	0.812604	1.502	-0.185997	-0.243104	-0.616848	-1.26865	1	875	1
876	876	ENSG00000065802|ASB1	0.889051	1.41733	0.0691635	-0.5218	-0.606316	-1.24743	1	876	1
877	877	ENSG00000148832|PAOX	0.839167	1.44751	0.0493162	-0.407848	-0.67007	-1.25807	1	877	1
878	878	ENSG00000163795|ZNF513	0.707239	1.59031	-0.13992	-0.524109	-0.403062	-1.23045	1	878	1
879	879	ENSG00000112511|PHF1	0.703609	1.52871	-0.0078646	-0.474928	-0.420938	-1.32859	1	879	1
880	880	ENSG00000156983|BRPF1	0.635025	1.57649	0.00189439	-0.477791	-0.433655	-1.30196	1	880	1
881	881	ENSG00000100605|ITPK1	0.998229	1.30444	-0.0270267	-0.239278	-0.726116	-1.31025	1	881	1
882	882	ENSG00000178026|LRRC75B	0.995856	1.32169	-0.0711928	-0.230762	-0.714742	-1.30085	1	882	1
883	883	ENSG00000142330|CAPN10	1.15468	1.21527	-0.17762	-0.275761	-0.607838	-1.30873	1	883	1
884	884	ENSG00000081019|RSBN1	1.11877	1.28994	-0.155805	-0.389561	-0.6381	-1.22524	1	884	1
885	885	ENSG00000167566|NCKAP5L	1.02973	1.36938	-0.18036	-0.331737	-0.677586	-1.20944	1	885	1
886	886	ENSG00000076826|CAMSAP3	1.00356	1.31456	-0.209532	-0.271634	-0.438956	-1.398	1	886	1
887	887	ENSG00000224051|CPTP	0.997784	1.29345	-0.211213	-0.339374	-0.297306	-1.44334	1	887	1
888	888	ENSG00000181790|ADGRB1	1.03184	1.29854	-0.0559379	-0.505596	-0.422942	-1.34591	1	888	1
889	889	ENSG00000188986|NELFB	1.0724	1.31932	-0.188332	-0.553371	-0.374243	-1.27578	1	889	1
890	890	ENSG00000160097|FNDC5	0.902757	1.44975	-0.138592	-0.426748	-0.516136	-1.27103	1	890	1
891	891	ENSG00000179886|TIGD5	0.978515	1.41251	-0.258753	-0.464974	-0.401071	-1.26622	1	891	1
892	892	ENSG00000110107|PRPF19	0.940245	0.871269	0.903721	-0.822518	-0.756104	-1.13661	1	892	1
893	893	ENSG00000103034|NDRG4	0.973126	0.826808	0.908206	-0.767046	-0.780424	-1.16067	1	893	1
894	894	ENSG00000104714|ERICH1	0.96838	0.835138	0.914077	-0.790016	-0.80993	-1.11765	1	894	1
895	895	ENSG00000013306|SLC25A39	1.00022	0.780035	0.936435	-0.847548	-0.778019	-1.09112	1	895	1
896	896	ENSG00000183207|RUVBL2	0.996776	0.841837	0.8876	-0.867438	-0.807029	-1.05175	1	896	1
897	897	ENSG00000004478|FKBP4	0.907718	0.872916	0.945866	-0.851883	-0.802021	-1.0726	1	897	1
898	898	ENSG00000181929|PRKAG1	0.854058	0.866258	1.00446	-0.907995	-0.773394	-1.04339	1	898	1
899	899	ENSG00000132275|RRP8	0.953666	0.842205	0.910195	-0.894701	-0.669307	-1.14206	1	899	1
900	900	ENSG00000168765|GSTM4	0.935898	0.882647	0.896406	-0.891121	-0.70672	-1.11711	1	900	1
901	901	ENSG00000105568|PPP2R1A	0.927686	0.815257	0.974686	-0.926969	-0.718926	-1.07173	1	901	1
902	902	ENSG00000106077|ABHD11	0.915261	0.80985	0.979642	-0.917092	-0.661645	-1.12602	1	902	1
903	903	ENSG00000159720|ATP6V0D1	0.918271	0.741027	1.0347	-0.855225	-0.679486	-1.15929	1	903	1
904	904	ENSG00000168389|MFSD2A	0.951873	0.748334	0.977945	-0.849736	-0.610934	-1.21748	1	904	1
905	905	ENSG00000167136|ENDOG	0.849276	0.916951	0.915456	-0.887661	-0.578676	-1.21534	1	905	1
906	906	ENSG00000169972|PUSL1	0.863056	0.889389	0.947104	-0.920293	-0.627616	-1.15164	1	906	1
907	907	ENSG00000165916|PSMC3	0.924992	0.909283	0.862841	-0.8214	-0.673998	-1.20172	1	907	1
908	908	ENSG00000051108|HERPUD1	0.881595	0.925979	0.901966	-0.871617	-0.691899	-1.14602	1	908	1
909	909	ENSG00000110906|KCTD10	0.896597	0.946155	0.869103	-0.89623	-0.690919	-1.12471	1	909	1
910	910	ENSG00000115649|CNPPD1	0.949058	1.02158	0.691256	-0.860613	-0.572863	-1.22842	1	910	1
911	911	ENSG00000204463|BAG6	0.885607	1.08045	0.686714	-0.862443	-0.555815	-1.23451	1	911	1
912	912	ENSG00000132128|LRRC41	0.99183	0.963498	0.707355	-0.967379	-0.519977	-1.17533	1	912	1
913	913	ENSG00000125351|UPF3B	0.973889	1.00196	0.710411	-0.947544	-0.610971	-1.12775	1	913	1
914	914	ENSG00000054356|PTPRN	0.959579	0.974141	0.758386	-0.916807	-0.624275	-1.15102	1	914	1
915	915	ENSG00000178301|AQP11	0.92537	0.992425	0.774921	-0.938328	-0.613679	-1.14071	1	915	1
916	916	ENSG00000102103|PQBP1	0.809179	1.02022	0.830868	-0.92825	-0.510725	-1.22129	1	916	1
917	917	ENSG00000126457|PRMT1	0.75305	1.06139	0.859531	-0.924785	-0.572501	-1.17669	1	917	1
918	918	ENSG00000105341|DMAC2	0.797314	1.04198	0.835698	-0.899017	-0.57581	-1.20016	1	918	1
919	919	ENSG00000168802|CHTF8	0.77961	1.01695	0.878027	-0.902458	-0.567907	-1.20422	1	919	1
920	920	ENSG00000133101|CCNA1	0.89376	0.918273	0.862768	-1.02526	-0.507005	-1.14253	1	920	1
921	921	ENSG00000073464|CLCN4	0.883493	0.978902	0.814206	-1.05804	-0.518642	-1.09992	1	921	1
922	922	ENSG00000136270|TBRG4	0.888452	1.00307	0.788432	-1.02588	-0.542031	-1.11205	1	922	1
923	923	ENSG00000090432|MUL1	0.765671	0.976714	0.935264	-0.844385	-0.607081	-1.22618	1	923	1
924	924	ENSG00000132471|WBP2	0.741872	0.926263	0.996673	-0.804152	-0.598195	-1.26246	1	924	1
925	925	ENSG00000123240|OPTN	0.83269	0.907376	0.950517	-0.748123	-0.712823	-1.22964	1	925	1
926	926	ENSG00000071553|ATP6AP1	0.787469	1.01722	0.8871	-0.80979	-0.684607	-1.19739	1	926	1
927	927	ENSG00000105135|ILVBL	0.826251	0.952598	0.928968	-0.840386	-0.713506	-1.15393	1	927	1
928	928	ENSG00000005486|RHBDD2	0.782999	1.00115	0.849085	-0.784067	-0.512765	-1.3364	1	928	1
929	929	ENSG00000108523|RNF167	0.776691	0.9822	0.875744	-0.741317	-0.544647	-1.34867	1	929	1
930	930	ENSG00000183155|RABIF	0.838798	0.95676	0.863271	-0.751611	-0.59855	-1.30867	1	930	1
931	931	ENSG00000143390|RFX5	0.816129	0.943827	0.905254	-0.793512	-0.587744	-1.28395	1	931	1
932	932	ENSG00000203879|GDI1	0.834644	0.959112	0.876697	-0.805561	-0.595523	-1.26937	1	932	1
933	933	ENSG00000173540|GMPPB	0.805456	1.07665	0.792798	-0.787222	-0.659107	-1.22857	1	933	1
934	934	ENSG00000197858|GPAA1	0.727187	1.02803	0.901326	-0.783983	-0.594173	-1.27839	1	934	1
935	935	ENSG00000258311|BLOC1S1-RDH5	0.7207	1.06135	0.871971	-0.75945	-0.613859	-1.28071	1	935	1
936	936	ENSG00000130640|TUBGCP2	0.744214	1.08858	0.815434	-0.851533	-0.539841	-1.25685	1	936	1
937	937	ENSG00000169217|CD2BP2	0.775079	1.06794	0.809175	-0.814347	-0.563952	-1.27389	1	937	1
938	938	ENSG00000167508|MVD	0.777777	1.018	0.868715	-0.823073	-0.580714	-1.26071	1	938	1
939	939	ENSG00000178028|DMAP1	0.744915	1.06738	0.854603	-0.845264	-0.593164	-1.22847	1	939	1
940	940	ENSG00000104973|MED25	0.943566	0.741734	1.03764	-0.866609	-0.861749	-0.994582	1	940	1
941	941	ENSG00000152684|PELO	0.851545	0.792241	1.07633	-0.92097	-0.794453	-1.00469	1	941	1
942	942	ENSG00000159228|CBR1	0.85347	0.837969	1.03956	-0.869497	-0.92402	-0.937483	1	942	1
943	943	ENSG00000179344|HLA-DQB1	0.915907	0.832677	0.984917	-0.974856	-0.857616	-0.901029	1	943	1
944	944	ENSG00000244486|SCARF2	0.708768	1.00259	1.00989	-0.959564	-0.887024	-0.874655	1	944	1
945	945	ENSG00000115661|STK16	0.744498	0.925759	1.05413	-0.868781	-0.951022	-0.904586	1	945	1
946	946	ENSG00000114767|RRP9	0.750419	0.926651	1.04848	-0.932755	-0.926198	-0.866601	1	946	1
947	947	ENSG00000164062|APEH	0.786008	0.919352	1.02331	-0.932913	-0.957538	-0.83822	1	947	1
948	948	ENSG00000094914|AAAS	0.770879	0.991877	0.958363	-0.766285	-0.924592	-1.03024	1	948	1
949	949	ENSG00000100029|PES1	0.686111	0.968985	1.05918	-0.814256	-0.935794	-0.964227	1	949	1
950	950	ENSG00000128965|CHAC1	0.915934	1.03701	0.772591	-0.836546	-0.895407	-0.993584	1	950	1
951	951	ENSG00000133884|DPF2	1.0086	0.946562	0.769978	-0.798183	-0.95316	-0.973795	1	951	1
952	952	ENSG00000118960|HS1BP3	0.90226	0.95688	0.876212	-0.910457	-0.97766	-0.847236	1	952	1
953	953	ENSG00000141433|ADCYAP1	0.928422	0.930639	0.878674	-0.884704	-0.938961	-0.91407	1	953	1
954	954	ENSG00000100462|PRMT5	0.963794	0.9518	0.818765	-0.935736	-0.870355	-0.928268	1	954	1
955	955	ENSG00000117280|RAB29	0.962206	0.923029	0.847535	-0.920267	-0.821446	-0.991058	1	955	1
956	956	ENSG00000100302|RASD2	0.961425	0.914545	0.854753	-0.793102	-0.933667	-1.00395	1	956	1
957	957	ENSG00000174684|B4GAT1	0.92895	0.875442	0.929873	-0.830568	-0.906497	-0.997201	1	957	1
958	958	ENSG00000154803|FLCN	0.984691	1.02441	0.712673	-0.927867	-0.936283	-0.85762	1	958	1
959	959	ENSG00000164889|SLC4A2	0.832219	1.11046	0.776333	-0.959706	-0.918228	-0.84108	1	959	1
960	960	ENSG00000171540|OTP	0.836614	1.09004	0.798122	-0.901946	-0.907589	-0.915241	1	960	1
961	961	ENSG00000001036|FUCA2	0.871875	0.981127	0.876614	-1.0391	-0.853082	-0.837439	1	961	1
962	962	ENSG00000172270|BSG	0.830243	0.93259	0.965846	-1.03605	-0.879603	-0.813025	1	962	1
963	963	ENSG00000116133|DHCR24	0.970031	0.932959	0.821754	-1.05169	-0.774315	-0.898738	1	963	1
964	964	ENSG00000130312|MRPL34	0.887721	1.0287	0.792509	-1.10973	-0.711712	-0.887482	1	964	1
965	965	ENSG00000153395|LPCAT1	0.934853	1.0165	0.760013	-1.10872	-0.772373	-0.830272	1	965	1
966	966	ENSG00000134824|FADS2	0.980227	0.949713	0.758186	-0.746578	-0.72565	-1.2159	1	966	1
967	967	ENSG00000272031|ANKRD34A	0.950131	1.01298	0.721064	-0.715144	-0.759541	-1.20949	1	967	1
968	968	ENSG00000172663|TMEM134	0.891251	0.995627	0.830876	-0.777066	-0.834186	-1.1065	1	968	1
969	969	ENSG00000118162|KPTN	0.948612	0.910732	0.847567	-0.760901	-0.773141	-1.17287	1	969	1
970	970	ENSG00000164877|MICALL2	0.908027	0.925353	0.861054	-0.684404	-0.793735	-1.21629	1	970	1
971	971	ENSG00000278817|AC007325.4	0.886959	0.946385	0.864121	-0.72978	-0.757478	-1.21021	1	971	1
972	972	ENSG00000159713|TPPP3	0.968189	1.03882	0.692958	-0.789362	-0.789521	-1.12109	1	972	1
973	973	ENSG00000160410|SHKBP1	0.959654	1.09107	0.63944	-0.762935	-0.821182	-1.10605	1	973	1
974	974	ENSG00000172893|DHCR7	1.04725	0.934121	0.726509	-0.888614	-0.73881	-1.08046	1	974	1
975	975	ENSG00000170445|HARS	0.974668	1.01528	0.70981	-0.866417	-0.71154	-1.1218	1	975	1
976	976	ENSG00000123989|CHPF	0.939934	1.07109	0.696965	-0.87983	-0.775622	-1.05254	1	976	1
977	977	ENSG00000141551|CSNK1D	0.920296	1.05513	0.731776	-0.843627	-0.764284	-1.09929	1	977	1
978	978	ENSG00000171453|POLR1C	0.991461	0.748188	0.984958	-0.816644	-0.955723	-0.95224	1	978	1
979	979	ENSG00000241878|PISD	1.01512	0.782428	0.924494	-0.770707	-0.926732	-1.02461	1	979	1
980	980	ENSG00000068323|TFE3	1.10087	0.764283	0.855289	-0.849541	-0.952766	-0.91813	1	980	1
981	981	ENSG00000123560|PLP1	1.07724	0.818628	0.829802	-0.862401	-0.907077	-0.956192	1	981	1
982	982	ENSG00000120306|CYSTM1	1.06346	0.730606	0.927946	-0.865543	-0.898277	-0.958188	1	982	1
983	983	ENSG00000120885|CLU	1.09266	0.733049	0.895037	-0.917381	-0.904232	-0.899128	1	983	1
984	984	ENSG00000144199|FAHD2B	1.1295	0.823905	0.763043	-0.869717	-0.895432	-0.951298	1	984	1
985	985	ENSG00000155252|PI4K2A	1.18419	0.78694	0.731092	-0.841473	-0.882032	-0.978712	1	985	1
986	986	ENSG00000109046|WSB1	1.02934	0.880696	0.818154	-0.853849	-0.867059	-1.00728	1	986	1
987	987	ENSG00000147383|NSDHL	1.07687	0.85099	0.789327	-0.873607	-0.798162	-1.04541	1	987	1
988	988	ENSG00000257529|RPL36A-HNRNPH2	1.13315	0.724211	0.845693	-0.79203	-0.848379	-1.06265	1	988	1
989	989	ENSG00000124508|BTN2A2	1.06396	0.789287	0.861977	-0.832708	-0.805841	-1.07668	1	989	1
990	990	ENSG00000169085|VXN	1.05003	0.762768	0.89411	-0.760282	-0.825889	-1.12074	1	990	1
991	991	ENSG00000198951|NAGA	1.06801	0.750541	0.901388	-0.935021	-0.802212	-0.982712	1	991	1
992	992	ENSG00000110880|CORO1C	1.06849	0.805193	0.836331	-0.892003	-0.73253	-1.08548	1	992	1
993	993	ENSG00000133316|WDR74	1.10766	0.769843	0.821474	-0.925418	-0.691234	-1.08232	1	993	1
994	994	ENSG00000136717|BIN1	0.498702	1.36617	0.76081	-0.812063	-0.875232	-0.938386	1	994	1
995	995	ENSG00000167657|DAPK3	0.414035	1.38952	0.786411	-0.755894	-0.802834	-1.03124	1	995	1
996	996	ENSG00000233276|GPX1	0.460856	1.40702	0.726765	-0.849621	-0.739667	-1.00536	1	996	1
997	997	ENSG00000068120|COASY	0.564499	1.26955	0.805498	-0.870804	-0.662729	-1.10601	1	997	1
998	998	ENSG00000167130|DOLPP1	0.515838	1.31544	0.798641	-0.952213	-0.678161	-0.999544	1	998	1
999	999	ENSG00000101150|TPD52L2	0.531946	1.25489	0.875152	-0.883355	-0.804677	-0.973952	1	999	1
1000	1000	ENSG00000135587|SMPD2	0.560456	1.18189	0.924965	-0.874908	-0.720639	-1.07177	1	1000	1
1001	1001	ENSG00000007376|RPUSD1	0.644004	1.21635	0.800172	-1.03696	-0.621802	-1.00177	1	1001	1
1002	1002	ENSG00000082641|NFE2L1	0.670381	1.22976	0.754213	-1.02466	-0.600876	-1.02881	1	1002	1
1003	1003	ENSG00000141522|ARHGDIA	0.576088	1.286	0.746026	-1.04687	-0.513119	-1.04812	1	1003	1
1004	1004	ENSG00000196544|BORCS6	0.601426	1.22035	0.8072	-0.99978	-0.522397	-1.1068	1	1004	1
1005	1005	ENSG00000112335|SNX3	0.723181	1.20945	0.728847	-1.01174	-0.602848	-1.04689	1	1005	1
1006	1006	ENSG00000145214|DGKQ	0.739557	1.21722	0.704153	-0.929788	-0.628224	-1.10292	1	1006	1
1007	1007	ENSG00000129473|BCL2L2	0.761149	1.15466	0.775434	-0.885215	-0.71374	-1.09229	1	1007	1
1008	1008	ENSG00000196976|LAGE3	0.738223	1.15114	0.78134	-0.939395	-0.602757	-1.12855	1	1008	1
1009	1009	ENSG00000131165|CHMP1A	0.767642	1.15927	0.718597	-0.922144	-0.533744	-1.18962	1	1009	1
1010	1010	ENSG00000149547|EI24	0.849814	1.14819	0.657855	-0.931029	-0.568829	-1.156	1	1010	1
1011	1011	ENSG00000103187|COTL1	0.716037	1.24443	0.656288	-1.03396	-0.486207	-1.09658	1	1011	1
1012	1012	ENSG00000163449|TMEM169	0.727145	1.26126	0.622754	-0.935322	-0.51111	-1.16473	1	1012	1
1013	1013	ENSG00000110721|CHKA	0.723731	1.3992	0.462219	-0.848394	-0.672314	-1.06444	1	1013	1
1014	1014	ENSG00000163093|BBS5	0.641036	1.43522	0.482376	-0.947611	-0.580922	-1.0301	1	1014	1
1015	1015	ENSG00000217128|FNIP1	0.684315	1.41888	0.460815	-1.00764	-0.578604	-0.97776	1	1015	1
1016	1016	ENSG00000100243|CYB5R3	0.718429	1.2418	0.720984	-0.919188	-0.769903	-0.992125	1	1016	1
1017	1017	ENSG00000204590|GNL1	0.639145	1.30468	0.707197	-0.940494	-0.710864	-0.999663	1	1017	1
1018	1018	ENSG00000132589|FLOT2	0.645869	1.35021	0.617752	-0.83085	-0.669754	-1.11323	1	1018	1
1019	1019	ENSG00000166484|MAPK7	0.637286	1.35149	0.644744	-0.797033	-0.795701	-1.04079	1	1019	1
1020	1020	ENSG00000040487|PQLC2	0.69935	1.27353	0.686148	-0.82333	-0.751322	-1.08438	1	1020	1
1021	1021	ENSG00000131653|TRAF7	0.670152	1.2859	0.698215	-0.848265	-0.730534	-1.07547	1	1021	1
1022	1022	ENSG00000103249|CLCN7	0.671649	1.29144	0.665775	-0.57815	-1.04616	-1.00455	1	1022	1
1023	1023	ENSG00000185453|ZSWIM9	0.745521	1.3122	0.586572	-0.706796	-0.99845	-0.939045	1	1023	1
1024	1024	ENSG00000165233|CARD19	0.72116	1.24583	0.699916	-0.685607	-0.940054	-1.04125	1	1024	1
1025	1025	ENSG00000168875|SOX14	0.720401	1.24761	0.710513	-0.756287	-0.970614	-0.951626	1	1025	1
1026	1026	ENSG00000108963|DPH1	0.806366	1.26102	0.562774	-0.576027	-1.00129	-1.05284	1	1026	1
1027	1027	ENSG00000133027|PEMT	0.876686	1.25343	0.509586	-0.662764	-0.928239	-1.0487	1	1027	1
1028	1028	ENSG00000166965|RCCD1	0.837204	1.2449	0.574528	-0.680087	-0.947452	-1.0291	1	1028	1
1029	1029	ENSG00000173267|SNCG	0.882969	1.20881	0.560808	-0.63264	-0.963427	-1.05652	1	1029	1
1030	1030	ENSG00000228672|PROB1	0.870355	1.31208	0.416676	-0.653344	-0.855687	-1.09008	1	1030	1
1031	1031	ENSG00000092096|SLC22A17	0.899602	1.31432	0.385089	-0.666323	-0.925506	-1.00719	1	1031	1
1032	1032	ENSG00000110697|PITPNM1	0.899111	1.30588	0.40597	-0.705886	-0.887236	-1.01784	1	1032	1
1033	1033	ENSG00000126107|HECTD3	0.809066	1.32514	0.493432	-0.717814	-0.895807	-1.01401	1	1033	1
1034	1034	ENSG00000180104|EXOC3	0.779463	1.33368	0.498483	-0.684766	-0.82214	-1.10472	1	1034	1
1035	1035	ENSG00000227057|WDR46	0.863522	1.11553	0.725207	-0.791363	-1.0751	-0.837798	1	1035	1
1036	1036	ENSG00000099992|TBC1D10A	0.764474	1.11235	0.839654	-0.857027	-1.00036	-0.859084	1	1036	1
1037	1037	ENSG00000143641|GALNT2	0.714102	1.21082	0.763561	-0.85192	-1.03805	-0.798514	1	1037	1
1038	1038	ENSG00000101986|ABCD1	0.944437	1.0935	0.650725	-0.850022	-1.11427	-0.724372	1	1038	1
1039	1039	ENSG00000266524|GDF10	0.93387	1.13767	0.604992	-0.944388	-1.06042	-0.671724	1	1039	1
1040	1040	ENSG00000100726|TELO2	0.97035	1.13471	0.586405	-0.882246	-0.98203	-0.827188	1	1040	1
1041	1041	ENSG00000173511|VEGFB	0.938716	1.15913	0.589908	-0.809535	-1.00257	-0.875644	1	1041	1
1042	1042	ENSG00000160570|DEDD2	0.953658	1.05755	0.704379	-0.83251	-1.01198	-0.871094	1	1042	1
1043	1043	ENSG00000173805|HAP1	1.02177	1.04721	0.629363	-0.775015	-1.04225	-0.881084	1	1043	1
1044	1044	ENSG00000130309|COLGALT1	1.02178	1.07696	0.577862	-0.672758	-1.03263	-0.971213	1	1044	1
1045	1045	ENSG00000068394|GPKOW	0.904421	1.06001	0.727569	-0.623197	-1.05295	-1.01586	1	1045	1
1046	1046	ENSG00000173545|ZNF622	0.889501	1.05334	0.77229	-0.73305	-1.01478	-0.967304	1	1046	1
1047	1047	ENSG00000047579|DTNBP1	0.838598	1.12144	0.743035	-0.715722	-0.995281	-0.992066	1	1047	1
1048	1048	ENSG00000136877|FPGS	0.854202	1.12365	0.71777	-0.683599	-1.02964	-0.982384	1	1048	1
1049	1049	ENSG00000166986|MARS	1.13542	0.947832	0.60855	-0.853098	-1.02867	-0.810041	1	1049	1
1050	1050	ENSG00000196365|LONP1	1.06845	0.984025	0.658253	-0.855423	-0.972262	-0.883044	1	1050	1
1051	1051	ENSG00000105607|GCDH	1.12101	0.891576	0.690329	-0.751671	-0.935691	-1.01555	1	1051	1
1052	1052	ENSG00000128928|IVD	1.09157	0.928174	0.690067	-0.809875	-0.879208	-1.02072	1	1052	1
1053	1053	ENSG00000100227|POLDIP3	1.07303	1.00555	0.617142	-0.762707	-0.908929	-1.02408	1	1053	1
1054	1054	ENSG00000215305|VPS16	1.12231	0.955743	0.612208	-0.736554	-1.00101	-0.952701	1	1054	1
1055	1055	ENSG00000128245|YWHAH	0.989323	1.18481	0.36739	-1.14073	-0.384077	-1.01671	1	1055	1
1056	1056	ENSG00000159346|ADIPOR1	0.98131	1.13343	0.473817	-1.11048	-0.420971	-1.05711	1	1056	1
1057	1057	ENSG00000189319|FAM53B	0.881734	1.21124	0.448561	-1.08748	-0.330503	-1.12355	1	1057	1
1058	1058	ENSG00000204851|PNMA8B	0.851441	1.26226	0.411043	-1.18046	-0.343698	-1.00059	1	1058	1
1059	1059	ENSG00000048540|LMO3	0.916115	1.12923	0.475335	-1.30767	-0.279451	-0.933557	1	1059	1
1060	1060	ENSG00000103502|CDIPT	0.856204	1.28263	0.317266	-1.26583	-0.270765	-0.919504	1	1060	1
1061	1061	ENSG00000186469|GNG2	0.889474	1.19454	0.370438	-1.26877	-0.185426	-1.00026	1	1061	1
1062	1062	ENSG00000071626|DAZAP1	1.06002	1.10502	0.368682	-1.2883	-0.417664	-0.827761	1	1062	1
1063	1063	ENSG00000147118|ZNF182	1.05541	1.10253	0.316558	-1.38586	-0.375234	-0.713394	1	1063	1
1064	1064	ENSG00000169957|ZNF768	0.911835	1.28116	0.337227	-1.26011	-0.537636	-0.732479	1	1064	1
1065	1065	ENSG00000206053|JPT2	0.880721	1.23939	0.406986	-1.30299	-0.417645	-0.80647	1	1065	1
1066	1066	ENSG00000170364|SETMAR	0.957444	1.33276	0.135757	-1.2206	-0.412523	-0.792832	1	1066	1
1067	1067	ENSG00000121989|ACVR2A	0.843503	1.33709	0.31411	-1.24552	-0.436899	-0.812285	1	1067	1
1068	1068	ENSG00000215193|PEX26	0.799498	1.36254	0.268668	-1.30662	-0.346335	-0.777755	1	1068	1
1069	1069	ENSG00000170855|TRIAP1	0.943754	1.16189	0.532713	-1.19434	-0.664941	-0.779076	1	1069	1
1070	1070	ENSG00000175166|PSMD2	0.847873	1.20999	0.581082	-1.17018	-0.609073	-0.85969	1	1070	1
1071	1071	ENSG00000198833|UBE2J1	0.778825	1.35104	0.47722	-1.06538	-0.67887	-0.862832	1	1071	1
1072	1072	ENSG00000104825|NFKBIB	0.769851	1.2626	0.638877	-1.01236	-0.784562	-0.874407	1	1072	1
1073	1073	ENSG00000185339|TCN2	0.791811	1.23145	0.640564	-1.1144	-0.729974	-0.819448	1	1073	1
1074	1074	ENSG00000127561|SYNGR3	0.829776	1.32608	0.390767	-1.08461	-0.452471	-1.00954	1	1074	1
1075	1075	ENSG00000147912|FBXO10	0.824089	1.38072	0.335656	-1.04669	-0.534072	-0.9597	1	1075	1
1076	1076	ENSG00000131037|EPS8L1	0.9328	1.32947	0.313421	-1.03799	-0.721553	-0.81615	1	1076	1
1077	1077	ENSG00000100304|TTLL12	1.03305	1.22943	0.283065	-1.16153	-0.561112	-0.822905	1	1077	1
1078	1078	ENSG00000102967|DHODH	1.06591	1.17986	0.336021	-1.08074	-0.571246	-0.929805	1	1078	1
1079	1079	ENSG00000142538|PTH2	0.943195	1.24075	0.461727	-0.917843	-0.970207	-0.757622	1	1079	1
1080	1080	ENSG00000084652|TXLNA	1.05141	1.17486	0.419761	-0.913599	-0.829447	-0.902989	1	1080	1
1081	1081	ENSG00000162757|C1orf74	1.00321	1.2148	0.417749	-1.01412	-0.810793	-0.810856	1	1081	1
1082	1082	ENSG00000112246|SIM1	0.869577	1.30657	0.463216	-0.886076	-0.878989	-0.874297	1	1082	1
1083	1083	ENSG00000180902|D2HGDH	0.810534	1.35077	0.46365	-0.860677	-0.825659	-0.938619	1	1083	1
1084	1084	ENSG00000157184|CPT2	0.915731	1.36633	0.29149	-0.847032	-0.892424	-0.834098	1	1084	1
1085	1085	ENSG00000171604|CXXC5	0.841935	1.37018	0.382671	-0.945292	-0.90636	-0.743135	1	1085	1
1086	1086	ENSG00000171298|GAA	0.95513	1.27038	0.389052	-0.929493	-0.703241	-0.98183	1	1086	1
1087	1087	ENSG00000066044|ELAVL1	0.901863	1.26387	0.450331	-0.963642	-0.611036	-1.04139	1	1087	1
1088	1088	ENSG00000174938|SEZ6L2	0.933179	1.2558	0.417434	-0.930468	-0.605894	-1.07005	1	1088	1
1089	1089	ENSG00000121769|FABP3	0.813808	1.26804	0.569627	-0.816135	-0.751855	-1.08349	1	1089	1
1090	1090	ENSG00000173846|PLK3	0.869309	1.3019	0.449385	-0.818202	-0.737392	-1.065	1	1090	1
1091	1091	ENSG00000083799|CYLD	0.84284	1.30397	0.464761	-0.877008	-0.643894	-1.09066	1	1091	1
1092	1092	ENSG00000175029|CTBP2	0.826765	1.31336	0.458924	-0.793795	-0.656296	-1.14896	1	1092	1
1093	1093	ENSG00000126456|IRF3	0.845335	1.19587	0.643001	-0.894227	-0.753244	-1.03674	1	1093	1
1094	1094	ENSG00000173456|RNF26	0.78063	1.21134	0.688906	-0.909015	-0.723723	-1.04814	1	1094	1
1095	1095	ENSG00000100401|RANGAP1	0.781729	1.28655	0.563382	-0.98617	-0.610683	-1.03481	1	1095	1
1096	1096	ENSG00000197063|MAFG	0.851006	1.27639	0.506019	-0.968824	-0.649913	-1.01467	1	1096	1
1097	1097	ENSG00000168488|ATXN2L	0.896196	1.23833	0.51699	-0.918245	-0.707234	-1.02603	1	1097	1
1098	1098	ENSG00000204922|UQCC3	0.899413	1.2142	0.546471	-0.92117	-0.699637	-1.03928	1	1098	1
1099	1099	ENSG00000007255|TRAPPC6A	0.835174	1.27998	0.543264	-0.906006	-0.796572	-0.955839	1	1099	1
1100	1100	ENSG00000129911|KLF16	0.91603	1.21616	0.54026	-0.873117	-0.833252	-0.966083	1	1100	1
1101	1101	ENSG00000137216|TMEM63B	0.889759	1.19646	0.598578	-0.870685	-0.820733	-0.993384	1	1101	1
1102	1102	ENSG00000089639|GMIP	0.935237	1.12601	0.6254	-1.04386	-0.704546	-0.938234	1	1102	1
1103	1103	ENSG00000108861|DUSP3	0.912427	1.14683	0.610191	-1.03663	-0.626329	-1.00649	1	1103	1
1104	1104	ENSG00000135052|GOLM1	0.939672	1.18166	0.52365	-1.03562	-0.60599	-1.00337	1	1104	1
1105	1105	ENSG00000278619|MRM1	1.19921	1.07501	0.273989	-1.02501	-0.516155	-1.00703	1	1105	1
1106	1106	ENSG00000128829|EIF2AK4	1.09137	1.08006	0.413789	-1.18148	-0.489703	-0.914032	1	1106	1
1107	1107	ENSG00000136274|NACAD	1.16782	1.00469	0.419856	-1.1414	-0.507481	-0.943495	1	1107	1
1108	1108	ENSG00000148798|INA	1.02361	1.03441	0.611137	-1.0857	-0.596424	-0.987037	1	1108	1
1109	1109	ENSG00000101363|MANBAL	1.06405	1.00455	0.596615	-1.02071	-0.589141	-1.05537	1	1109	1
1110	1110	ENSG00000171368|TPPP	1.03848	0.997851	0.649012	-1.02884	-0.63573	-1.02077	1	1110	1
1111	1111	ENSG00000158109|TPRG1L	1.08149	1.01632	0.58235	-1.07904	-0.722401	-0.878724	1	1111	1
1112	1112	ENSG00000109472|CPE	1.05537	0.925268	0.716266	-1.10053	-0.672373	-0.923999	1	1112	1
1113	1113	ENSG00000128886|ELL3	1.03438	0.9772	0.693994	-1.0495	-0.726157	-0.929916	1	1113	1
1114	1114	ENSG00000180828|BHLHE22	1.20099	0.973653	0.463562	-1.04506	-0.667133	-0.926019	1	1114	1
1115	1115	ENSG00000147130|ZMYM3	1.15099	0.923215	0.600719	-0.969112	-0.668581	-1.03723	1	1115	1
1116	1116	ENSG00000152556|PFKM	1.14897	0.950523	0.550703	-0.952741	-0.599003	-1.09845	1	1116	1
1117	1117	ENSG00000104722|NEFM	0.949369	1.01535	0.681284	-1.20201	-0.480922	-0.963066	1	1117	1
1118	1118	ENSG00000175279|CENPS	0.9788	0.980326	0.677117	-1.23418	-0.459855	-0.94221	1	1118	1
1119	1119	ENSG00000116717|GADD45A	1.05325	1.03515	0.537505	-1.23158	-0.553317	-0.840996	1	1119	1
1120	1120	ENSG00000165280|VCP	0.976137	1.09393	0.540715	-1.25973	-0.504465	-0.84658	1	1120	1
1121	1121	ENSG00000167114|SLC27A4	1.15605	0.925481	0.503795	-1.09584	-0.396136	-1.09336	1	1121	1
1122	1122	ENSG00000213699|SLC35F6	1.052	1.05684	0.513193	-1.11296	-0.494082	-1.015	1	1122	1
1123	1123	ENSG00000113119|TMCO6	1.08546	0.979282	0.580347	-1.09999	-0.525218	-1.01988	1	1123	1
1124	1124	ENSG00000182810|DDX28	1.14881	0.958855	0.518377	-1.052	-0.516262	-1.05778	1	1124	1
1125	1125	ENSG00000133983|COX16	0.914651	1.09973	0.594793	-1.13632	-0.401509	-1.07135	1	1125	1
1126	1126	ENSG00000170893|TRH	0.956851	1.05047	0.569409	-1.1629	-0.316441	-1.09739	1	1126	1
1127	1127	ENSG00000241360|PDXP	1.00426	1.08394	0.505579	-0.982532	-0.419946	-1.1913	1	1127	1
1128	1128	ENSG00000138085|ATRAID	0.971042	1.04499	0.622162	-1.06058	-0.465752	-1.11186	1	1128	1
1129	1129	ENSG00000163069|SGCB	1.03065	1.01812	0.584217	-1.04894	-0.471867	-1.11218	1	1129	1
1130	1130	ENSG00000175376|EIF1AD	1.06264	0.937602	0.607567	-1.0747	-0.384214	-1.1489	1	1130	1
1131	1131	ENSG00000188706|ZDHHC9	0.98865	0.978546	0.625945	-1.08359	-0.330704	-1.17884	1	1131	1
1132	1132	ENSG00000095539|SEMA4G	1.02914	0.996649	0.598451	-0.874098	-0.491744	-1.2584	1	1132	1
1133	1133	ENSG00000127526|SLC35E1	1.09848	0.961088	0.522914	-0.801187	-0.461817	-1.31948	1	1133	1
1134	1134	ENSG00000074582|BCS1L	1.03511	0.960204	0.590185	-0.750273	-0.464133	-1.3711	1	1134	1
1135	1135	ENSG00000146826|C7orf43	1.0471	0.931771	0.630794	-0.792963	-0.484968	-1.33173	1	1135	1
1136	1136	ENSG00000160285|LSS	1.02076	0.996343	0.628083	-0.719737	-0.647152	-1.2783	1	1136	1
1137	1137	ENSG00000099940|SNAP29	1.00534	1.03746	0.564077	-0.702731	-0.572558	-1.33159	1	1137	1
1138	1138	ENSG00000277531|PNMA8C	0.998936	1.00714	0.584831	-0.70941	-0.509188	-1.37231	1	1138	1
1139	1139	ENSG00000148814|LRRC27	0.936775	1.1301	0.586457	-0.83529	-0.634214	-1.18383	1	1139	1
1140	1140	ENSG00000100897|DCAF11	0.852884	1.18196	0.578507	-0.787909	-0.556373	-1.26907	1	1140	1
1141	1141	ENSG00000173210|ABLIM3	0.852052	1.13195	0.654656	-0.8064	-0.573163	-1.2591	1	1141	1
1142	1142	ENSG00000105255|FSD1	0.863528	1.09653	0.645286	-0.853921	-0.444077	-1.30735	1	1142	1
1143	1143	ENSG00000177370|TIMM22	0.862055	1.06933	0.685349	-0.889651	-0.438808	-1.28828	1	1143	1
1144	1144	ENSG00000013016|EHD3	0.909281	1.11203	0.580234	-0.876477	-0.447951	-1.27712	1	1144	1
1145	1145	ENSG00000101198|NKAIN4	0.985921	1.04774	0.552723	-0.895388	-0.402076	-1.28892	1	1145	1
1146	1146	ENSG00000143333|RGS16	1.05068	0.867207	0.722969	-0.720868	-0.60046	-1.31952	1	1146	1
1147	1147	ENSG00000151498|ACAD8	1.05226	0.864475	0.756221	-0.756809	-0.670861	-1.24529	1	1147	1
1148	1148	ENSG00000064490|RFXANK	1.08966	0.864565	0.723763	-0.926746	-0.602614	-1.14862	1	1148	1
1149	1149	ENSG00000111981|ULBP1	1.08391	0.923464	0.647355	-0.896107	-0.560004	-1.19862	1	1149	1
1150	1150	ENSG00000189114|BLOC1S3	1.17556	0.80997	0.681801	-0.841676	-0.665594	-1.16006	1	1150	1
1151	1151	ENSG00000085733|CTTN	1.15117	0.910818	0.597942	-0.800983	-0.686303	-1.17265	1	1151	1
1152	1152	ENSG00000089195|TRMT6	1.10579	0.92635	0.642048	-0.828098	-0.681083	-1.16501	1	1152	1
1153	1153	ENSG00000130165|ELOF1	1.08556	0.917046	0.683587	-0.808595	-0.718825	-1.15877	1	1153	1
1154	1154	ENSG00000115350|POLE4	1.02357	1.11489	0.50047	-0.875423	-0.619544	-1.14396	1	1154	1
1155	1155	ENSG00000154781|CCDC174	1.0511	1.07305	0.537242	-0.927829	-0.652715	-1.08084	1	1155	1
1156	1156	ENSG00000249242|TMEM150C	1.03982	1.06524	0.560093	-0.938772	-0.64088	-1.0855	1	1156	1
1157	1157	ENSG00000149243|KLHL35	1.23875	0.921298	0.439543	-0.886263	-0.564855	-1.14847	1	1157	1
1158	1158	ENSG00000205336|ADGRG1	1.24727	0.899618	0.467785	-0.866381	-0.612137	-1.13616	1	1158	1
1159	1159	ENSG00000135924|DNAJB2	1.126	1.03845	0.472949	-0.805528	-0.688667	-1.14321	1	1159	1
1160	1160	ENSG00000135447|PPP1R1A	1.15575	1.03288	0.422502	-0.849028	-0.611299	-1.15081	1	1160	1
1161	1161	ENSG00000141854|MISP3	1.16501	1.03533	0.411999	-0.811772	-0.654211	-1.14636	1	1161	1
1162	1162	ENSG00000092841|MYL6	1.00872	0.848224	0.756187	-0.992803	-0.367001	-1.25333	1	1162	1
1163	1163	ENSG00000133935|ERG28	1.01378	0.85056	0.730584	-1.03616	-0.317567	-1.2412	1	1163	1
1164	1164	ENSG00000006625|GGCT	1.06106	0.720291	0.796974	-1.03023	-0.294211	-1.25389	1	1164	1
1165	1165	ENSG00000107959|PITRM1	1.08491	0.760318	0.728656	-0.997735	-0.300041	-1.27611	1	1165	1
1166	1166	ENSG00000153130|SCOC	1.05831	0.779607	0.757317	-0.986133	-0.340007	-1.26909	1	1166	1
1167	1167	ENSG00000118518|RNF146	0.913225	0.783222	0.871469	-1.08293	-0.23367	-1.25131	1	1167	1
1168	1168	ENSG00000213523|SRA1	0.919785	0.742791	0.938232	-1.05123	-0.318555	-1.23102	1	1168	1
1169	1169	ENSG00000123374|CDK2	0.963221	0.843213	0.758315	-0.991192	-0.254966	-1.31859	1	1169	1
1170	1170	ENSG00000157514|TSC22D3	0.964394	0.797396	0.786042	-0.998104	-0.218446	-1.33128	1	1170	1
1171	1171	ENSG00000186010|NDUFA13	0.884954	0.876945	0.806376	-1.00698	-0.249257	-1.31204	1	1171	1
1172	1172	ENSG00000123136|DDX39A	0.917435	0.837479	0.834664	-0.973798	-0.304589	-1.31119	1	1172	1
1173	1173	ENSG00000166452|AKIP1	0.932158	0.869251	0.780738	-0.947056	-0.301668	-1.33342	1	1173	1
1174	1174	ENSG00000119760|SUPT7L	0.866632	1.01434	0.65138	-1.09148	-0.188278	-1.2526	1	1174	1
1175	1175	ENSG00000272398|CD24	0.927516	0.936513	0.680195	-1.12558	-0.196104	-1.22254	1	1175	1
1176	1176	ENSG00000167272|POP5	1.00644	0.864668	0.635044	-1.09569	-0.139136	-1.27132	1	1176	1
1177	1177	ENSG00000198668|CALM1	0.993654	0.891453	0.681344	-1.08735	-0.250913	-1.22819	1	1177	1
1178	1178	ENSG00000198843|SELENOT	1.02197	0.915154	0.611735	-1.05825	-0.238844	-1.25176	1	1178	1
1179	1179	ENSG00000005194|CIAPIN1	0.92258	0.874418	0.835331	-1.14931	-0.376907	-1.10611	1	1179	1
1180	1180	ENSG00000112514|CUTA	0.987139	0.834975	0.800393	-1.07951	-0.364077	-1.17891	1	1180	1
1181	1181	ENSG00000278615|C11orf98	0.971764	0.873334	0.775889	-1.13006	-0.356561	-1.13436	1	1181	1
1182	1182	ENSG00000130770|ATP5IF1	0.943364	0.915555	0.797193	-1.01439	-0.460515	-1.1812	1	1182	1
1183	1183	ENSG00000166133|RPUSD2	0.911393	0.922274	0.800618	-1.04954	-0.392033	-1.19271	1	1183	1
1184	1184	ENSG00000028839|TBPL1	0.918839	0.857713	0.834792	-1.03081	-0.336629	-1.2439	1	1184	1
1185	1185	ENSG00000180992|MRPL14	0.864318	0.918879	0.852404	-1.01238	-0.399491	-1.22373	1	1185	1
1186	1186	ENSG00000053372|MRTO4	0.862401	0.995074	0.735146	-1.10766	-0.297404	-1.18756	1	1186	1
1187	1187	ENSG00000111726|CMAS	0.805831	1.0199	0.778138	-1.09479	-0.325758	-1.18332	1	1187	1
1188	1188	ENSG00000107282|APBA1	0.868332	0.948224	0.794729	-1.13091	-0.327535	-1.15284	1	1188	1
1189	1189	ENSG00000143155|TIPRL	0.912765	0.974583	0.741649	-1.0812	-0.386488	-1.16131	1	1189	1
1190	1190	ENSG00000101473|ACOT8	0.805477	0.910173	0.887367	-1.05215	-0.314047	-1.23682	1	1190	1
1191	1191	ENSG00000103018|CYB5B	0.789665	0.942042	0.845497	-1.03749	-0.263706	-1.276	1	1191	1
1192	1192	ENSG00000171160|MORN4	0.881513	0.889848	0.817745	-1.09809	-0.273794	-1.21723	1	1192	1
1193	1193	ENSG00000100216|TOMM22	0.892354	0.928261	0.782558	-1.08809	-0.311469	-1.20362	1	1193	1
1194	1194	ENSG00000181704|YIPF6	0.883093	0.944279	0.775984	-1.06178	-0.317616	-1.22396	1	1194	1
1195	1195	ENSG00000131475|VPS25	0.66273	1.04794	0.820514	-1.17668	-0.183558	-1.17094	1	1195	1
1196	1196	ENSG00000145545|SRD5A1	0.742563	1.01026	0.784243	-1.20576	-0.179401	-1.15191	1	1196	1
1197	1197	ENSG00000110442|COMMD9	0.697523	0.943232	0.928755	-1.13019	-0.246352	-1.19296	1	1197	1
1198	1198	ENSG00000134287|ARF3	0.744808	0.949466	0.86129	-1.1317	-0.208189	-1.21568	1	1198	1
1199	1199	ENSG00000160679|CHTOP	0.781837	0.931133	0.866045	-1.093	-0.256737	-1.22928	1	1199	1
1200	1200	ENSG00000167740|CYB5D2	0.823825	0.983057	0.699434	-1.03566	-0.138797	-1.33186	1	1200	1
1201	1201	ENSG00000117410|ATP6V0B	0.805467	0.945812	0.776542	-1.0303	-0.169607	-1.32792	1	1201	1
1202	1202	ENSG00000171224|FAM241B	0.828379	0.952573	0.741201	-0.986417	-0.174254	-1.36148	1	1202	1
1203	1203	ENSG00000147471|PLPBP	0.751437	0.95918	0.799845	-1.04958	-0.135943	-1.32494	1	1203	1
1204	1204	ENSG00000164885|CDK5	0.739085	0.964084	0.813686	-1.02112	-0.155874	-1.33986	1	1204	1
1205	1205	ENSG00000160014|CALM3	0.722231	1.02652	0.796505	-1.05037	-0.213787	-1.28111	1	1205	1
1206	1206	ENSG00000256537|SMIM10L1	0.749921	0.999386	0.773633	-1.06961	-0.160896	-1.29243	1	1206	1
1207	1207	ENSG00000158604|TMED4	0.797298	1.03261	0.784429	-1.02188	-0.365823	-1.22664	1	1207	1
1208	1208	ENSG00000087074|PPP1R15A	0.684945	1.10175	0.801474	-0.991107	-0.341898	-1.25517	1	1208	1
1209	1209	ENSG00000011009|LYPLA2	0.752286	1.12508	0.703394	-1.00144	-0.329493	-1.24982	1	1209	1
1210	1210	ENSG00000089486|CDIP1	0.757162	1.08543	0.740209	-1.00849	-0.315793	-1.25852	1	1210	1
1211	1211	ENSG00000106484|MEST	0.69911	1.08593	0.75857	-1.06098	-0.225663	-1.25697	1	1211	1
1212	1212	ENSG00000108774|RAB5C	0.67229	1.10236	0.774551	-1.00668	-0.256563	-1.28595	1	1212	1
1213	1213	ENSG00000135720|DYNC1LI2	0.676511	1.10453	0.756207	-0.996537	-0.236251	-1.30446	1	1213	1
1214	1214	ENSG00000099817|POLR2E	0.711826	1.01336	0.84974	-1.02383	-0.278973	-1.27212	1	1214	1
1215	1215	ENSG00000168090|COPS6	0.6963	1.03046	0.841668	-1.08986	-0.257609	-1.22096	1	1215	1
1216	1216	ENSG00000158526|TSR2	0.710474	0.976111	0.920004	-1.05783	-0.339814	-1.20895	1	1216	1
1217	1217	ENSG00000015592|STMN4	0.658534	1.01368	0.9359	-0.986163	-0.377972	-1.24398	1	1217	1
1218	1218	ENSG00000103415|HMOX2	0.686033	0.985221	0.909354	-0.976668	-0.306196	-1.29774	1	1218	1
1219	1219	ENSG00000130489|SCO2	0.782938	0.904879	0.952824	-1.00175	-0.423313	-1.21558	1	1219	1
1220	1220	ENSG00000167191|GPRC5B	0.745365	0.918989	0.956516	-1.01421	-0.37574	-1.23092	1	1220	1
1221	1221	ENSG00000111652|COPS7A	0.79323	0.930461	0.935887	-0.978452	-0.480922	-1.2002	1	1221	1
1222	1222	ENSG00000167645|YIF1B	0.7911	0.952533	0.903672	-0.925229	-0.466452	-1.25562	1	1222	1
1223	1223	ENSG00000156587|UBE2L6	0.864713	0.984534	0.780241	-0.921269	-0.426062	-1.28216	1	1223	1
1224	1224	ENSG00000156873|PHKG2	0.84427	1.00401	0.775033	-0.960578	-0.399258	-1.26348	1	1224	1
1225	1225	ENSG00000104976|SNAPC2	0.80425	0.972589	0.820939	-0.946397	-0.338806	-1.31258	1	1225	1
1226	1226	ENSG00000105649|RAB3A	0.844324	0.912592	0.861363	-0.940136	-0.380592	-1.29755	1	1226	1
1227	1227	ENSG00000126768|TIMM17B	0.86036	0.966158	0.751617	-0.875809	-0.328958	-1.37337	1	1227	1
1228	1228	ENSG00000148331|ASB6	0.874445	0.934687	0.762006	-0.925922	-0.28859	-1.35663	1	1228	1
1229	1229	ENSG00000179562|GCC1	0.903065	0.936651	0.733409	-0.891758	-0.311277	-1.37009	1	1229	1
1230	1230	ENSG00000135472|FAIM2	0.868512	0.996014	0.705857	-1.00972	-0.271391	-1.28927	1	1230	1
1231	1231	ENSG00000144021|CIAO1	0.893143	0.940701	0.758067	-0.975357	-0.315953	-1.3006	1	1231	1
1232	1232	ENSG00000105364|MRPL4	0.709756	1.08261	0.765827	-0.931964	-0.290213	-1.33601	1	1232	1
1233	1233	ENSG00000243279|PRAF2	0.730549	1.07528	0.777413	-0.952182	-0.331349	-1.29971	1	1233	1
1234	1234	ENSG00000166140|ZFYVE19	0.706475	1.12182	0.761988	-0.899579	-0.385302	-1.3054	1	1234	1
1235	1235	ENSG00000198356|ASNA1	0.688812	1.13293	0.754088	-0.950569	-0.338792	-1.28647	1	1235	1
1236	1236	ENSG00000064961|HMG20B	0.751522	1.06829	0.763419	-0.856591	-0.369971	-1.35667	1	1236	1
1237	1237	ENSG00000178952|TUFM	0.734878	1.0702	0.752488	-0.880769	-0.306037	-1.37076	1	1237	1
1238	1238	ENSG00000106992|AK1	0.808203	1.04925	0.713078	-0.897895	-0.320408	-1.35223	1	1238	1
1239	1239	ENSG00000183283|DAZAP2	0.82794	1.04207	0.724631	-0.952157	-0.347944	-1.29454	1	1239	1
1240	1240	ENSG00000197062|ZSCAN26	0.783016	0.981746	0.868704	-0.864853	-0.462142	-1.30647	1	1240	1
1241	1241	ENSG00000214530|STARD10	0.752775	1.0452	0.832954	-0.872243	-0.467156	-1.29153	1	1241	1
1242	1242	ENSG00000115234|SNX17	0.643848	1.06964	0.879254	-0.916615	-0.377986	-1.29814	1	1242	1
1243	1243	ENSG00000078902|TOLLIP	0.7252	1.0577	0.836994	-0.939102	-0.415935	-1.26486	1	1243	1
1244	1244	ENSG00000159348|CYB5R1	0.735947	1.06515	0.831338	-0.943126	-0.446935	-1.24237	1	1244	1
1245	1245	ENSG00000122644|ARL4A	0.951718	1.02864	0.688462	-1.11609	-0.540759	-1.01197	1	1245	1
1246	1246	ENSG00000131236|CAP1	0.920983	1.0379	0.717086	-1.10206	-0.555416	-1.01849	1	1246	1
1247	1247	ENSG00000141580|WDR45B	0.992816	0.920681	0.770474	-1.07583	-0.556523	-1.05162	1	1247	1
1248	1248	ENSG00000172269|DPAGT1	0.973848	0.924519	0.794494	-1.13489	-0.600028	-0.957938	1	1248	1
1249	1249	ENSG00000129472|RAB2B	0.939004	0.887395	0.820979	-1.30697	-0.511651	-0.828759	1	1249	1
1250	1250	ENSG00000102805|CLN5	0.912861	0.91241	0.815157	-1.26617	-0.439916	-0.934344	1	1250	1
1251	1251	ENSG00000123353|ORMDL2	0.91393	0.941758	0.80542	-1.23634	-0.505494	-0.919276	1	1251	1
1252	1252	ENSG00000130985|UBA1	0.887952	0.865631	0.896937	-1.22278	-0.44618	-0.981559	1	1252	1
1253	1253	ENSG00000181965|NEUROG1	0.886617	0.868537	0.90384	-1.25245	-0.49734	-0.909209	1	1253	1
1254	1254	ENSG00000120314|WDR55	0.990176	0.795759	0.875499	-1.23089	-0.5134	-0.917141	1	1254	1
1255	1255	ENSG00000141219|C17orf80	0.956294	0.828725	0.894863	-1.16852	-0.543092	-0.968268	1	1255	1
1256	1256	ENSG00000277586|NEFL	0.685571	1.01199	0.964887	-1.14309	-0.520944	-0.998415	1	1256	1
1257	1257	ENSG00000131652|THOC6	0.7754	0.906279	0.982338	-1.11732	-0.483618	-1.06308	1	1257	1
1258	1258	ENSG00000165443|PHYHIPL	0.753291	0.915299	0.992719	-1.14603	-0.485732	-1.02955	1	1258	1
1259	1259	ENSG00000267673|FDX2	0.709782	1.08497	0.87485	-0.993264	-0.553512	-1.12283	1	1259	1
1260	1260	ENSG00000275778|PRH1-PRR4	0.71495	1.12405	0.829074	-1.01234	-0.561012	-1.09473	1	1260	1
1261	1261	ENSG00000161544|CYGB	0.651756	1.10195	0.904363	-1.01392	-0.536246	-1.1079	1	1261	1
1262	1262	ENSG00000177427|MIEF2	0.692087	1.04703	0.929424	-1.0359	-0.537876	-1.09477	1	1262	1
1263	1263	ENSG00000112578|BYSL	0.69466	1.13288	0.828373	-1.10265	-0.525946	-1.02731	1	1263	1
1264	1264	ENSG00000204438|GPANK1	0.593285	1.12121	0.93693	-1.07628	-0.548693	-1.02646	1	1264	1
1265	1265	ENSG00000105784|RUNDC3B	0.657855	1.10539	0.910526	-1.10709	-0.605284	-0.96139	1	1265	1
1266	1266	ENSG00000154639|CXADR	0.675332	1.06547	0.948024	-1.10074	-0.657474	-0.930615	1	1266	1
1267	1267	ENSG00000089157|RPLP0	0.667388	1.00826	1.0102	-1.02767	-0.620992	-1.03719	1	1267	1
1268	1268	ENSG00000174460|ZCCHC12	0.65381	1.06067	0.968272	-0.956753	-0.633834	-1.09217	1	1268	1
1269	1269	ENSG00000004961|HCCS	0.833926	0.926308	0.946224	-1.01843	-0.632751	-1.05528	1	1269	1
1270	1270	ENSG00000143811|PYCR2	0.794149	0.931361	0.980775	-1.02115	-0.645864	-1.03928	1	1270	1
1271	1271	ENSG00000144848|ATG3	0.779681	0.916789	1.00221	-1.02763	-0.617664	-1.05339	1	1271	1
1272	1272	ENSG00000165507|DEPP1	0.842523	0.959598	0.925372	-0.959258	-0.762646	-1.00559	1	1272	1
1273	1273	ENSG00000166260|COX11	0.866386	0.958975	0.900597	-0.969787	-0.743716	-1.01246	1	1273	1
1274	1274	ENSG00000204568|MRPS18B	0.848062	0.887923	0.978693	-1.05207	-0.680368	-0.98224	1	1274	1
1275	1275	ENSG00000100577|GSTZ1	0.835553	0.958896	0.919292	-1.0468	-0.672015	-0.994922	1	1275	1
1276	1276	ENSG00000116983|HPCAL4	0.858339	0.929135	0.928915	-1.06683	-0.686161	-0.963396	1	1276	1
1277	1277	ENSG00000095321|CRAT	0.880345	1.06552	0.750287	-0.954463	-0.648366	-1.09332	1	1277	1
1278	1278	ENSG00000136856|SLC2A8	0.934897	1.017	0.749578	-0.982471	-0.650829	-1.06817	1	1278	1
1279	1279	ENSG00000263465|SRSF8	0.928393	1.04662	0.722934	-0.98982	-0.652249	-1.05588	1	1279	1
1280	1280	ENSG00000139197|PEX5	0.886069	0.966436	0.861539	-0.960798	-0.678424	-1.07482	1	1280	1
1281	1281	ENSG00000133313|CNDP2	0.844048	1.03208	0.835704	-0.94764	-0.695276	-1.06891	1	1281	1
1282	1282	ENSG00000204347|BTBD17	0.870869	1.01794	0.81719	-0.947748	-0.662763	-1.09549	1	1282	1
1283	1283	ENSG00000072778|ACADVL	0.74302	1.11557	0.843938	-0.994184	-0.706548	-1.00179	1	1283	1
1284	1284	ENSG00000169016|E2F6	0.777862	1.07594	0.860155	-0.963234	-0.739181	-1.01154	1	1284	1
1285	1285	ENSG00000067082|KLF6	0.810247	1.07865	0.806974	-1.05008	-0.633382	-1.01241	1	1285	1
1286	1286	ENSG00000108828|VAT1	0.803099	1.06489	0.836775	-1.03205	-0.667949	-1.00477	1	1286	1
1287	1287	ENSG00000090487|SPG21	0.837765	1.06847	0.790543	-1.1005	-0.645777	-0.950495	1	1287	1
1288	1288	ENSG00000160908|ZNF394	0.75986	1.07416	0.856269	-1.1092	-0.624215	-0.956881	1	1288	1
1289	1289	ENSG00000115307|AUP1	0.729247	1.22745	0.528072	-0.84125	-0.263006	-1.38052	1	1289	1
1290	1290	ENSG00000063176|SPHK2	0.752214	1.24361	0.515899	-0.8653	-0.314594	-1.33182	1	1290	1
1291	1291	ENSG00000166199|ALKBH3	0.788237	1.24261	0.482747	-0.857486	-0.330584	-1.32552	1	1291	1
1292	1292	ENSG00000177542|SLC25A22	0.809419	1.20659	0.503102	-0.819323	-0.340016	-1.35977	1	1292	1
1293	1293	ENSG00000186501|TMEM222	0.776855	1.20222	0.562459	-0.848813	-0.355618	-1.33711	1	1293	1
1294	1294	ENSG00000196972|SMIM10L2B	0.796184	1.2146	0.562974	-0.870904	-0.4239	-1.27896	1	1294	1
1295	1295	ENSG00000204619|PPP1R11	0.821165	1.19695	0.562266	-0.821711	-0.457912	-1.30076	1	1295	1
1296	1296	ENSG00000100908|EMC9	0.777449	1.1182	0.679762	-0.827266	-0.388914	-1.35923	1	1296	1
1297	1297	ENSG00000105520|PLPPR2	0.81141	1.12701	0.610357	-0.876727	-0.320086	-1.35197	1	1297	1
1298	1298	ENSG00000174775|HRAS	0.781801	1.16589	0.580056	-0.803721	-0.332438	-1.39159	1	1298	1
1299	1299	ENSG00000174996|KLC2	0.59283	1.31838	0.608973	-0.946708	-0.336514	-1.23696	1	1299	1
1300	1300	ENSG00000103550|KNOP1	0.580759	1.37576	0.537947	-0.895754	-0.351971	-1.24674	1	1300	1
1301	1301	ENSG00000204576|PRR3	0.556076	1.36152	0.563006	-0.878277	-0.318994	-1.28333	1	1301	1
1302	1302	ENSG00000139531|SUOX	0.655622	1.32192	0.581591	-0.767648	-0.514665	-1.27682	1	1302	1
1303	1303	ENSG00000059915|PSD	0.613327	1.33797	0.549673	-0.775843	-0.392688	-1.33244	1	1303	1
1304	1304	ENSG00000102882|MAPK3	0.606875	1.32015	0.58405	-0.752925	-0.412523	-1.34563	1	1304	1
1305	1305	ENSG00000070423|RNF126	0.630072	1.40232	0.444062	-0.785721	-0.40226	-1.28847	1	1305	1
1306	1306	ENSG00000071889|FAM3A	0.61324	1.38441	0.543004	-0.865513	-0.47678	-1.19836	1	1306	1
1307	1307	ENSG00000163794|UCN	0.589731	1.39894	0.518216	-0.880671	-0.407658	-1.21856	1	1307	1
1308	1308	ENSG00000110921|MVK	0.601815	1.26079	0.703408	-0.833544	-0.443201	-1.28927	1	1308	1
1309	1309	ENSG00000198892|SHISA4	0.615856	1.24786	0.73282	-0.813347	-0.520713	-1.26248	1	1309	1
1310	1310	ENSG00000123154|WDR83	0.679758	1.20553	0.688699	-0.802043	-0.44036	-1.33159	1	1310	1
1311	1311	ENSG00000133878|DUSP26	0.668422	1.23986	0.649608	-0.898317	-0.377082	-1.2825	1	1311	1
1312	1312	ENSG00000135617|PRADC1	0.694624	1.24935	0.557374	-0.676822	-0.400694	-1.42383	1	1312	1
1313	1313	ENSG00000167733|HSD11B1L	0.753452	1.22104	0.60542	-0.751948	-0.502462	-1.3255	1	1313	1
1314	1314	ENSG00000161682|FAM171A2	0.787014	1.28773	0.482436	-0.757644	-0.514799	-1.28474	1	1314	1
1315	1315	ENSG00000213023|SYT3	0.722958	1.29416	0.53525	-0.729222	-0.510142	-1.313	1	1315	1
1316	1316	ENSG00000204580|DDR1	0.982779	1.11199	0.41328	-0.73702	-0.377886	-1.39314	1	1316	1
1317	1317	ENSG00000187954|CYHR1	0.978966	1.05536	0.516752	-0.776661	-0.395627	-1.37879	1	1317	1
1318	1318	ENSG00000196363|WDR5	0.933459	1.08294	0.512813	-0.715918	-0.388778	-1.42451	1	1318	1
1319	1319	ENSG00000007372|PAX6	1.01177	1.14092	0.404036	-0.782177	-0.484113	-1.29043	1	1319	1
1320	1320	ENSG00000198837|DENND4B	1.05589	1.12737	0.394158	-0.827637	-0.526365	-1.22341	1	1320	1
1321	1321	ENSG00000105290|APLP1	1.00179	1.12831	0.409633	-0.874556	-0.383003	-1.28218	1	1321	1
1322	1322	ENSG00000103855|CD276	0.950873	1.19471	0.341954	-0.816491	-0.341183	-1.32986	1	1322	1
1323	1323	ENSG00000090097|PCBP4	0.90775	1.19916	0.406864	-0.8346	-0.356836	-1.32234	1	1323	1
1324	1324	ENSG00000162512|SDC3	0.895748	1.2252	0.408525	-0.854421	-0.392161	-1.28289	1	1324	1
1325	1325	ENSG00000026297|RNASET2	0.834731	1.34729	0.374918	-0.74829	-0.628723	-1.17993	1	1325	1
1326	1326	ENSG00000113758|DBN1	0.866696	1.29576	0.396467	-0.720103	-0.600459	-1.23837	1	1326	1
1327	1327	ENSG00000159069|FBXW5	0.818505	1.33538	0.373787	-0.717877	-0.548481	-1.26131	1	1327	1
1328	1328	ENSG00000090971|NAT14	0.795983	1.33904	0.393569	-0.837065	-0.466833	-1.22469	1	1328	1
1329	1329	ENSG00000090238|YPEL3	0.725368	1.34655	0.481185	-0.788128	-0.528663	-1.23631	1	1329	1
1330	1330	ENSG00000170892|TSEN34	0.741127	1.36741	0.416476	-0.763055	-0.511539	-1.25042	1	1330	1
1331	1331	ENSG00000100099|HPS4	0.827912	1.27366	0.468495	-0.681085	-0.609202	-1.27979	1	1331	1
1332	1332	ENSG00000143590|EFNA3	0.808419	1.24972	0.519824	-0.651079	-0.621314	-1.30557	1	1332	1
1333	1333	ENSG00000169231|THBS3	0.851792	1.21832	0.505496	-0.693583	-0.565152	-1.31688	1	1333	1
1334	1334	ENSG00000250510|GPR162	0.873518	1.22251	0.467096	-0.63804	-0.599106	-1.32598	1	1334	1
1335	1335	ENSG00000004777|ARHGAP33	0.875598	1.30083	0.322013	-0.695313	-0.496348	-1.30678	1	1335	1
1336	1336	ENSG00000109103|UNC119	0.888145	1.24913	0.411176	-0.779758	-0.490864	-1.27783	1	1336	1
1337	1337	ENSG00000100083|GGA1	0.955292	1.18775	0.388497	-0.668614	-0.517062	-1.34586	1	1337	1
1338	1338	ENSG00000161642|ZNF385A	0.947678	1.2416	0.369358	-0.707381	-0.601633	-1.24962	1	1338	1
1339	1339	ENSG00000125826|RBCK1	0.750049	1.16687	0.443694	-0.260374	-0.49982	-1.60042	1	1339	1
1340	1340	ENSG00000104915|STX10	0.644484	1.16155	0.611604	-0.278274	-0.571945	-1.56742	1	1340	1
1341	1341	ENSG00000148399|DPH7	0.642516	1.11102	0.670094	-0.273787	-0.566053	-1.58379	1	1341	1
1342	1342	ENSG00000143393|PI4KB	0.966756	1.03408	0.49717	-0.437318	-0.564272	-1.49641	1	1342	1
1343	1343	ENSG00000205356|TECPR1	0.856316	1.185	0.40858	-0.426594	-0.528589	-1.49471	1	1343	1
1344	1344	ENSG00000123143|PKN1	0.877847	1.14487	0.404101	-0.311895	-0.598303	-1.51662	1	1344	1
1345	1345	ENSG00000185019|UBOX5	0.935088	1.11861	0.428038	-0.387777	-0.62961	-1.46435	1	1345	1
1346	1346	ENSG00000067445|TRO	0.802895	1.17422	0.581145	-0.485296	-0.67959	-1.39337	1	1346	1
1347	1347	ENSG00000127419|TMEM175	0.728791	1.16217	0.595343	-0.48606	-0.486774	-1.51347	1	1347	1
1348	1348	ENSG00000133619|KRBA1	0.684848	1.19444	0.621755	-0.434241	-0.589945	-1.47686	1	1348	1
1349	1349	ENSG00000148341|SH3GLB2	0.732454	1.35247	0.426896	-0.526491	-0.673197	-1.31214	1	1349	1
1350	1350	ENSG00000197122|SRC	0.762358	1.3693	0.310539	-0.429015	-0.66244	-1.35074	1	1350	1
1351	1351	ENSG00000171703|TCEA2	0.770872	1.35225	0.363328	-0.662205	-0.49818	-1.32607	1	1351	1
1352	1352	ENSG00000177169|ULK1	0.771496	1.36825	0.303042	-0.575482	-0.505705	-1.3616	1	1352	1
1353	1353	ENSG00000162971|TYW5	0.651219	1.39224	0.384172	-0.566926	-0.462665	-1.39804	1	1353	1
1354	1354	ENSG00000179526|SHARPIN	0.650356	1.40614	0.371087	-0.491388	-0.55204	-1.38416	1	1354	1
1355	1355	ENSG00000105676|ARMC6	0.711801	1.3363	0.468717	-0.621267	-0.556996	-1.33855	1	1355	1
1356	1356	ENSG00000160058|BSDC1	0.68516	1.30868	0.490856	-0.526137	-0.542152	-1.41641	1	1356	1
1357	1357	ENSG00000186868|MAPT	0.723796	1.3176	0.446139	-0.49149	-0.605998	-1.39004	1	1357	1
1358	1358	ENSG00000130881|LRP3	0.826294	1.20276	0.331447	-0.407759	-0.389902	-1.56284	1	1358	1
1359	1359	ENSG00000132153|DHX30	0.806383	1.19555	0.349874	-0.337916	-0.434261	-1.57963	1	1359	1
1360	1360	ENSG00000165716|FAM69B	0.814479	1.26052	0.339506	-0.495824	-0.436866	-1.48181	1	1360	1
1361	1361	ENSG00000178605|GTPBP6	0.890159	1.22816	0.260053	-0.478134	-0.403515	-1.49672	1	1361	1
1362	1362	ENSG00000174943|KCTD13	0.908966	1.16147	0.411013	-0.608975	-0.420533	-1.45194	1	1362	1
1363	1363	ENSG00000088899|LZTS3	0.728451	1.22671	0.49603	-0.548649	-0.400059	-1.50248	1	1363	1
1364	1364	ENSG00000188760|TMEM198	0.770127	1.18846	0.458244	-0.45601	-0.408517	-1.5523	1	1364	1
1365	1365	ENSG00000184281|TSSC4	0.471716	1.3956	0.517536	-0.723965	-0.256619	-1.40427	1	1365	1
1366	1366	ENSG00000127445|PIN1	0.473063	1.40753	0.464418	-0.74599	-0.189413	-1.40961	1	1366	1
1367	1367	ENSG00000143294|PRCC	0.470943	1.40558	0.483278	-0.753521	-0.206855	-1.39943	1	1367	1
1368	1368	ENSG00000123933|MXD4	0.527288	1.45968	0.386317	-0.729196	-0.293454	-1.35064	1	1368	1
1369	1369	ENSG00000162728|KCNJ9	0.44557	1.47489	0.421317	-0.725197	-0.253271	-1.36331	1	1369	1
1370	1370	ENSG00000102870|ZNF629	0.515496	1.51017	0.249732	-0.673941	-0.228557	-1.3729	1	1370	1
1371	1371	ENSG00000168256|NKIRAS2	0.606796	1.46034	0.298412	-0.731782	-0.297243	-1.33652	1	1371	1
1372	1372	ENSG00000132563|REEP2	0.626391	1.39465	0.354833	-0.619502	-0.325693	-1.43068	1	1372	1
1373	1373	ENSG00000205643|CDPF1	0.640287	1.39315	0.377698	-0.670596	-0.349649	-1.39089	1	1373	1
1374	1374	ENSG00000130787|HIP1R	0.573206	1.44336	0.317142	-0.549951	-0.346807	-1.43695	1	1374	1
1375	1375	ENSG00000167987|VPS37C	0.523599	1.50903	0.304886	-0.607428	-0.36999	-1.3601	1	1375	1
1376	1376	ENSG00000173272|MZT2A	0.651804	1.39887	0.402415	-0.877488	-0.316025	-1.25957	1	1376	1
1377	1377	ENSG00000102109|PCSK1N	0.647505	1.39151	0.369468	-0.834428	-0.251838	-1.32221	1	1377	1
1378	1378	ENSG00000160087|UBE2J2	0.650047	1.36553	0.420156	-0.826516	-0.27626	-1.33296	1	1378	1
1379	1379	ENSG00000159409|CELF3	0.696228	1.38783	0.264395	-0.871039	-0.160267	-1.31715	1	1379	1
1380	1380	ENSG00000197982|C1orf122	0.673105	1.37664	0.317437	-0.77142	-0.213622	-1.38214	1	1380	1
1381	1381	ENSG00000115129|TP53I3	0.709027	1.28988	0.287006	-0.754487	-0.0553549	-1.47607	1	1381	1
1382	1382	ENSG00000146112|PPP1R18	0.779159	1.30873	0.284183	-0.685503	-0.248636	-1.43793	1	1382	1
1383	1383	ENSG00000167614|TTYH1	0.817154	1.40916	0.151021	-0.511666	-0.531859	-1.33381	1	1383	1
1384	1384	ENSG00000106330|MOSPD3	0.777174	1.34646	0.246107	-0.503176	-0.419844	-1.44672	1	1384	1
1385	1385	ENSG00000166886|NAB2	0.740418	1.41154	0.174333	-0.497875	-0.40946	-1.41895	1	1385	1
1386	1386	ENSG00000039523|RIPOR1	0.715486	1.47633	0.197194	-0.599444	-0.501711	-1.28786	1	1386	1
1387	1387	ENSG00000108309|RUNDC3A	0.665196	1.50978	0.165233	-0.594706	-0.440481	-1.30502	1	1387	1
1388	1388	ENSG00000204366|ZBTB12	0.78128	1.45069	0.20387	-0.7101	-0.509173	-1.21657	1	1388	1
1389	1389	ENSG00000121653|MAPK8IP1	0.804861	1.4202	0.172413	-0.68584	-0.425537	-1.2861	1	1389	1
1390	1390	ENSG00000204428|LY6G5C	0.818948	1.4172	0.153573	-0.690096	-0.415811	-1.28381	1	1390	1
1391	1391	ENSG00000134905|CARS2	0.666716	1.41431	0.0962861	-0.561543	-0.127708	-1.48806	1	1391	1
1392	1392	ENSG00000257704|INAFM1	0.758191	1.31555	0.165823	-0.535485	-0.170764	-1.53332	1	1392	1
1393	1393	ENSG00000275023|MLLT6	0.689645	1.38461	0.123431	-0.45847	-0.210305	-1.52891	1	1393	1
1394	1394	ENSG00000070413|DGCR2	0.700778	1.44983	0.134478	-0.613105	-0.281383	-1.39059	1	1394	1
1395	1395	ENSG00000123144|TRIR	0.7011	1.45614	0.057812	-0.704027	-0.144157	-1.36687	1	1395	1
1396	1396	ENSG00000183186|C2CD4C	0.526989	1.54504	0.109323	-0.536141	-0.238503	-1.40671	1	1396	1
1397	1397	ENSG00000103266|STUB1	0.638148	1.50064	0.0138803	-0.453117	-0.261932	-1.43762	1	1397	1
1398	1398	ENSG00000135439|AGAP2	0.668296	1.44995	0.125792	-0.49109	-0.303064	-1.44989	1	1398	1
1399	1399	ENSG00000204231|RXRB	0.874405	1.42416	0.151694	-0.735025	-0.563608	-1.15163	1	1399	1
1400	1400	ENSG00000213420|GPC2	0.908288	1.41346	0.133864	-0.674599	-0.647483	-1.13353	1	1400	1
1401	1401	ENSG00000236609|ZNF853	1.0696	1.20106	0.214813	-0.666625	-0.542835	-1.27601	1	1401	1
1402	1402	ENSG00000123815|COQ8B	1.03502	1.21584	0.30277	-0.787353	-0.58396	-1.18232	1	1402	1
1403	1403	ENSG00000168936|TMEM129	0.98515	1.26165	0.292325	-0.753182	-0.584598	-1.20134	1	1403	1
1404	1404	ENSG00000151640|DPYSL4	1.04591	1.21304	0.116991	-0.496107	-0.48829	-1.39154	1	1404	1
1405	1405	ENSG00000156381|ANKRD9	0.999571	1.26339	0.0722165	-0.454848	-0.479293	-1.40103	1	1405	1
1406	1406	ENSG00000139200|PIANP	1.05999	1.27981	0.0356614	-0.579154	-0.518369	-1.27794	1	1406	1
1407	1407	ENSG00000167291|TBC1D16	1.08083	1.24258	0.0592109	-0.532727	-0.544512	-1.30538	1	1407	1
1408	1408	ENSG00000082014|SMARCD3	0.990029	1.2798	0.112916	-0.55298	-0.473641	-1.35613	1	1408	1
1409	1409	ENSG00000285901|AC008012.1	0.954393	1.33184	0.0659135	-0.498828	-0.511455	-1.34186	1	1409	1
1410	1410	ENSG00000157881|PANK4	1.0977	1.21454	0.16994	-0.571867	-0.691168	-1.21915	1	1410	1
1411	1411	ENSG00000011132|APBA3	0.881554	1.35131	0.241048	-0.566587	-0.638404	-1.26892	1	1411	1
1412	1412	ENSG00000188763|FZD9	1.00068	1.24984	0.228293	-0.567532	-0.612232	-1.29904	1	1412	1
1413	1413	ENSG00000247315|ZCCHC3	0.972034	1.31751	0.141489	-0.506933	-0.652839	-1.27126	1	1413	1
1414	1414	ENSG00000104967|NOVA2	0.923998	1.32871	0.151955	-0.933627	-0.286055	-1.18498	1	1414	1
1415	1415	ENSG00000118816|CCNI	0.896405	1.29914	0.20576	-0.867996	-0.248273	-1.28503	1	1415	1
1416	1416	ENSG00000142634|EFHD2	0.867167	1.32209	0.220183	-0.899572	-0.253657	-1.25621	1	1416	1
1417	1417	ENSG00000066117|SMARCD1	0.860035	1.27523	0.262355	-1.02776	-0.150721	-1.21914	1	1417	1
1418	1418	ENSG00000160753|RUSC1	0.817773	1.30081	0.355381	-0.94461	-0.289751	-1.2396	1	1418	1
1419	1419	ENSG00000111218|PRMT8	0.786241	1.36088	0.285759	-0.9443	-0.270735	-1.21785	1	1419	1
1420	1420	ENSG00000147853|AK3	0.798227	1.34043	0.28182	-0.899951	-0.249998	-1.27053	1	1420	1
1421	1421	ENSG00000107185|RGP1	0.786786	1.289	0.357845	-0.849726	-0.237428	-1.34647	1	1421	1
1422	1422	ENSG00000108830|RND2	0.82734	1.28598	0.318176	-0.862158	-0.243472	-1.32587	1	1422	1
1423	1423	ENSG00000115073|ACTR1B	0.794746	1.25756	0.35492	-0.8386	-0.181234	-1.38739	1	1423	1
1424	1424	ENSG00000130294|KIF1A	0.851317	1.23991	0.314568	-0.86214	-0.178442	-1.36521	1	1424	1
1425	1425	ENSG00000111786|SRSF9	0.840826	1.31149	0.16672	-0.84658	-0.126134	-1.34633	1	1425	1
1426	1426	ENSG00000137842|TMEM62	0.877014	1.28253	0.190085	-0.906172	-0.135676	-1.30778	1	1426	1
1427	1427	ENSG00000146006|LRRTM2	0.875031	1.31489	0.138531	-0.919983	-0.135044	-1.27342	1	1427	1
1428	1428	ENSG00000204237|OXLD1	0.893955	1.29188	0.158579	-0.910536	-0.147008	-1.28687	1	1428	1
1429	1429	ENSG00000088038|CNOT3	0.99516	1.2716	-0.0972708	-0.714395	-0.0894982	-1.3656	1	1429	1
1430	1430	ENSG00000167671|UBXN6	0.941837	1.349	-0.0721398	-0.665681	-0.211329	-1.34169	1	1430	1
1431	1431	ENSG00000277258|PCGF2	1.0217	1.18674	0.0490519	-0.653369	-0.157132	-1.44699	1	1431	1
1432	1432	ENSG00000174672|BRSK2	0.854871	1.25476	0.149082	-0.725934	-0.0696607	-1.46312	1	1432	1
1433	1433	ENSG00000186395|KRT10	0.872622	1.28309	0.0870647	-0.662692	-0.12029	-1.45979	1	1433	1
1434	1434	ENSG00000159784|FAM131B	0.852621	1.27355	0.194752	-0.511708	-0.306818	-1.5024	1	1434	1
1435	1435	ENSG00000007520|TSR3	0.90579	1.31225	0.150797	-0.541819	-0.427598	-1.39942	1	1435	1
1436	1436	ENSG00000204228|HSD17B8	0.89363	1.29962	0.161972	-0.546269	-0.379294	-1.42966	1	1436	1
1437	1437	ENSG00000144485|HES6	1.05204	1.14372	0.106804	-0.486966	-0.321121	-1.49448	1	1437	1
1438	1438	ENSG00000157014|TATDN2	1.03526	1.16846	0.222825	-0.59148	-0.427775	-1.40729	1	1438	1
1439	1439	ENSG00000168528|SERINC2	1.04007	1.15874	0.176658	-0.621825	-0.320003	-1.43363	1	1439	1
1440	1440	ENSG00000185507|IRF7	1.03144	1.18048	0.159388	-0.614277	-0.332496	-1.42454	1	1440	1
1441	1441	ENSG00000100364|KIAA0930	1.07318	1.16041	0.203142	-0.812995	-0.321332	-1.3024	1	1441	1
1442	1442	ENSG00000135506|OS9	1.04156	1.17668	0.199653	-0.816977	-0.279981	-1.32094	1	1442	1
1443	1443	ENSG00000125898|FAM110A	1.02154	1.22741	0.134817	-0.844625	-0.252929	-1.28622	1	1443	1
1444	1444	ENSG00000150403|TMCO3	1.01836	1.2453	0.155919	-0.852877	-0.317951	-1.24875	1	1444	1
1445	1445	ENSG00000068137|PLEKHH3	1.01422	1.30935	0.0979794	-0.809112	-0.423658	-1.18878	1	1445	1
1446	1446	ENSG00000117408|IPO13	0.937359	1.33215	0.18901	-0.777783	-0.45721	-1.22353	1	1446	1
1447	1447	ENSG00000178531|CTXN1	0.987337	1.30996	0.157344	-0.711329	-0.511906	-1.23141	1	1447	1
1448	1448	ENSG00000115694|STK25	0.871245	1.35019	0.202223	-0.784828	-0.362156	-1.27668	1	1448	1
1449	1449	ENSG00000187713|TMEM203	0.922748	1.30805	0.191899	-0.665486	-0.423651	-1.33356	1	1449	1
1450	1450	ENSG00000150433|TMEM218	0.79968	1.1767	0.237862	-1.06173	0.174714	-1.32723	1	1450	1
1451	1451	ENSG00000165506|DNAAF2	0.748118	1.24594	0.233459	-0.968842	0.113173	-1.37185	1	1451	1
1452	1452	ENSG00000101224|CDC25B	0.813147	1.15662	0.28677	-0.778955	0.0423656	-1.51994	1	1452	1
1453	1453	ENSG00000134453|RBM17	0.850196	1.13469	0.245901	-0.770637	0.0665678	-1.52672	1	1453	1
1454	1454	ENSG00000142039|CCDC97	0.870941	1.13993	0.232454	-0.761299	0.0368796	-1.5189	1	1454	1
1455	1455	ENSG00000071246|VASH1	0.814531	1.21258	0.0937351	-0.876071	0.188521	-1.4333	1	1455	1
1456	1456	ENSG00000144306|SCRN3	0.77837	1.1663	0.178272	-0.813861	0.206537	-1.51561	1	1456	1
1457	1457	ENSG00000144597|EAF1	1.05771	0.888682	0.359568	-1.15357	0.119311	-1.27171	1	1457	1
1458	1458	ENSG00000102898|NUTF2	1.04001	0.94226	0.272213	-1.05602	0.150128	-1.3486	1	1458	1
1459	1459	ENSG00000107643|MAPK8	0.968884	0.943592	0.330417	-1.11294	0.204663	-1.33462	1	1459	1
1460	1460	ENSG00000059728|MXD1	1.06755	0.86906	0.408802	-0.9813	0.0406503	-1.40476	1	1460	1
1461	1461	ENSG00000103111|MON1B	1.1056	0.843203	0.397469	-0.931573	0.0138125	-1.42851	1	1461	1
1462	1462	ENSG00000022267|FHL1	0.974903	0.948857	0.444701	-0.995466	0.0269329	-1.39993	1	1462	1
1463	1463	ENSG00000137692|DCUN1D5	1.03732	0.947655	0.457653	-1.05536	-0.0851826	-1.30208	1	1463	1
1464	1464	ENSG00000148053|NTRK2	0.954165	0.988297	0.489709	-1.0369	-0.0555808	-1.33969	1	1464	1
1465	1465	ENSG00000103653|CSK	1.02997	1.11022	0.177736	-0.931882	-0.0426335	-1.34341	1	1465	1
1466	1466	ENSG00000164221|CCDC112	0.938932	1.14291	0.214014	-0.882302	-0.00363244	-1.40992	1	1466	1
1467	1467	ENSG00000135414|GDF11	1.11374	0.975176	0.116359	-1.0206	0.132829	-1.3175	1	1467	1
1468	1468	ENSG00000087152|ATXN7L3	1.16421	0.974468	0.15844	-0.949298	-0.0179889	-1.32983	1	1468	1
1469	1469	ENSG00000111266|DUSP16	1.12748	0.937043	0.247749	-1.05328	0.0366238	-1.29561	1	1469	1
1470	1470	ENSG00000125817|CENPB	0.903104	1.14984	0.0754009	-0.523237	0.00200792	-1.60711	1	1470	1
1471	1471	ENSG00000174521|TTC9B	0.913976	1.09979	0.194055	-0.498834	-0.0772225	-1.63176	1	1471	1
1472	1472	ENSG00000188290|HES4	0.878076	1.1205	0.200904	-0.533013	-0.0393722	-1.6271	1	1472	1
1473	1473	ENSG00000092051|JPH4	0.820022	1.0764	0.203001	-0.431977	0.046878	-1.71433	1	1473	1
1474	1474	ENSG00000131943|C19orf12	0.737794	1.18779	0.228313	-0.495174	-0.00117469	-1.65755	1	1474	1
1475	1475	ENSG00000136490|LIMD2	0.826574	1.20087	0.222216	-0.580194	-0.0947619	-1.57471	1	1475	1
1476	1476	ENSG00000227051|C14orf132	0.760832	1.24918	0.229959	-0.521473	-0.131498	-1.587	1	1476	1
1477	1477	ENSG00000140854|KATNB1	0.824214	1.11804	0.297746	-0.437457	-0.137708	-1.66483	1	1477	1
1478	1478	ENSG00000170619|COMMD5	0.816922	1.11036	0.371066	-0.564542	-0.111829	-1.62198	1	1478	1
1479	1479	ENSG00000274523|RCC1L	0.818291	1.13669	0.312417	-0.531884	-0.108861	-1.62665	1	1479	1
1480	1480	ENSG00000102900|NUP93	0.737083	1.1569	0.4368	-0.639626	-0.107884	-1.58327	1	1480	1
1481	1481	ENSG00000169750|RAC3	0.778711	1.08059	0.464239	-0.575143	-0.115516	-1.63288	1	1481	1
1482	1482	ENSG00000148297|MED22	0.771016	1.07107	0.406355	-0.633173	0.025363	-1.64063	1	1482	1
1483	1483	ENSG00000101098|RIMS4	0.796977	1.14328	0.344714	-0.714602	-0.0121353	-1.55824	1	1483	1
1484	1484	ENSG00000116670|MAD2L2	0.722913	1.17877	0.333729	-0.63611	0.00440939	-1.60371	1	1484	1
1485	1485	ENSG00000124541|RRP36	1.13925	0.850846	0.195194	-0.652308	0.0519004	-1.58489	1	1485	1
1486	1486	ENSG00000162910|MRPL55	1.04615	0.895903	0.294806	-0.621818	0.00647752	-1.62152	1	1486	1
1487	1487	ENSG00000124444|ZNF576	1.10878	0.946008	0.245587	-0.652781	-0.105482	-1.54211	1	1487	1
1488	1488	ENSG00000185189|NRBP2	1.15666	0.817483	0.28614	-0.587041	-0.0725944	-1.60065	1	1488	1
1489	1489	ENSG00000110881|ASIC1	1.06272	0.921934	0.127925	-0.535173	0.0697141	-1.64712	1	1489	1
1490	1490	ENSG00000152102|FAM168B	1.15315	0.761393	0.168312	-0.665357	0.189818	-1.60732	1	1490	1
1491	1491	ENSG00000162076|FLYWCH2	1.00652	0.932457	0.191682	-0.816182	0.223278	-1.53776	1	1491	1
1492	1492	ENSG00000124422|USP22	1.00536	1.0634	0.074626	-0.782673	0.130357	-1.49107	1	1492	1
1493	1493	ENSG00000184162|NR2C2AP	1.04666	1.00312	0.146005	-0.681737	0.0385807	-1.55263	1	1493	1
1494	1494	ENSG00000168564|CDKN2AIP	1.16789	0.969392	0.130954	-0.765973	-0.0568596	-1.44541	1	1494	1
1495	1495	ENSG00000100167|SEPT3	1.21694	0.924911	0.0582194	-0.678988	-0.0386265	-1.48246	1	1495	1
1496	1496	ENSG00000141759|TXNL4A	1.24341	0.904378	-0.00550626	-0.710167	0.0276476	-1.45976	1	1496	1
1497	1497	ENSG00000135686|KLHL36	1.20484	1.03943	-0.0796031	-0.790141	-0.0192014	-1.35533	1	1497	1
1498	1498	ENSG00000151502|VPS26B	1.09381	1.0745	-0.113629	-0.791516	0.146824	-1.40999	1	1498	1
1499	1499	ENSG00000168081|PNOC	1.19018	0.916901	0.437766	-0.644203	-0.544171	-1.35647	1	1499	1
1500	1500	ENSG00000104960|PTOV1	1.17167	0.905757	0.505689	-0.695789	-0.565536	-1.32179	1	1500	1
1501	1501	ENSG00000165948|IFI27L1	1.16501	0.872881	0.531275	-0.681582	-0.523933	-1.36365	1	1501	1
1502	1502	ENSG00000235173|HGH1	1.23868	0.830027	0.395432	-0.613885	-0.409484	-1.44077	1	1502	1
1503	1503	ENSG00000122085|MTERF4	1.0979	0.916986	0.468615	-0.565206	-0.423073	-1.49522	1	1503	1
1504	1504	ENSG00000197021|CXorf40B	1.04895	0.984487	0.446386	-0.618535	-0.375473	-1.48582	1	1504	1
1505	1505	ENSG00000169733|RFNG	1.15202	0.99094	0.321262	-0.535908	-0.494437	-1.43388	1	1505	1
1506	1506	ENSG00000126351|THRA	1.16435	0.989048	0.286385	-0.448098	-0.548703	-1.44298	1	1506	1
1507	1507	ENSG00000185163|DDX51	1.16233	1.02576	0.244853	-0.459629	-0.551541	-1.42176	1	1507	1
1508	1508	ENSG00000148337|CIZ1	1.30609	0.881186	0.142778	-0.496023	-0.383451	-1.45058	1	1508	1
1509	1509	ENSG00000165566|AMER2	1.30254	0.971535	0.089234	-0.586976	-0.424839	-1.35149	1	1509	1
1510	1510	ENSG00000166123|GPT2	1.32815	0.943975	0.122805	-0.487326	-0.584427	-1.32318	1	1510	1
1511	1511	ENSG00000158863|FAM160B2	1.24545	0.949896	0.184904	-0.45384	-0.488396	-1.43801	1	1511	1
1512	1512	ENSG00000169992|NLGN2	1.29617	0.892769	0.192885	-0.430807	-0.530046	-1.42097	1	1512	1
1513	1513	ENSG00000198598|MMP17	1.29778	0.911989	0.1232	-0.385063	-0.513822	-1.43408	1	1513	1
1514	1514	ENSG00000139266|MARCH9	1.29872	0.826785	0.214712	-0.669083	-0.227437	-1.4437	1	1514	1
1515	1515	ENSG00000099875|MKNK2	1.30879	0.857352	0.274358	-0.791739	-0.329047	-1.31971	1	1515	1
1516	1516	ENSG00000070610|GBA2	1.24892	0.896691	0.284899	-0.774883	-0.287445	-1.36818	1	1516	1
1517	1517	ENSG00000162374|ELAVL4	1.22768	0.877645	0.305537	-0.754592	-0.241543	-1.41472	1	1517	1
1518	1518	ENSG00000176022|B3GALT6	1.19256	1.05792	0.0985079	-0.635492	-0.319607	-1.39388	1	1518	1
1519	1519	ENSG00000156860|FBRS	1.24079	0.995015	0.0477248	-0.704159	-0.187589	-1.39179	1	1519	1
1520	1520	ENSG00000259956|RBM15B	1.31557	0.993749	-0.0304489	-0.717527	-0.257654	-1.30368	1	1520	1
1521	1521	ENSG00000008735|MAPK8IP2	1.19745	1.03528	0.278587	-0.728876	-0.505943	-1.2765	1	1521	1
1522	1522	ENSG00000213024|NUP62	1.19469	0.971955	0.379884	-0.730346	-0.520122	-1.29606	1	1522	1
1523	1523	ENSG00000133216|EPHB2	1.13729	1.06355	0.304886	-0.869794	-0.377638	-1.2583	1	1523	1
1524	1524	ENSG00000116871|MAP7D1	1.21766	1.06951	0.14706	-0.799812	-0.383358	-1.25106	1	1524	1
1525	1525	ENSG00000130713|EXOSC2	1.21473	0.988914	0.233818	-0.751686	-0.339978	-1.3458	1	1525	1
1526	1526	ENSG00000137142|IGFBPL1	1.34304	0.850296	0.344632	-0.995945	-0.476346	-1.06568	1	1526	1
1527	1527	ENSG00000144567|RETREG2	1.27587	0.935628	0.371697	-0.953095	-0.568485	-1.06162	1	1527	1
1528	1528	ENSG00000151689|INPP1	1.31822	0.825741	0.362185	-0.76358	-0.454189	-1.28838	1	1528	1
1529	1529	ENSG00000187243|MAGED4B	1.35655	0.757451	0.406221	-0.760307	-0.496346	-1.26357	1	1529	1
1530	1530	ENSG00000090372|STRN4	1.34095	0.885899	0.264005	-0.714603	-0.52816	-1.24809	1	1530	1
1531	1531	ENSG00000175895|PLEKHF2	1.38619	0.851277	0.283543	-0.748441	-0.619617	-1.15296	1	1531	1
1532	1532	ENSG00000185594|SPATA8	1.17097	0.693263	0.598801	-0.695375	-0.273999	-1.49366	1	1532	1
1533	1533	ENSG00000168958|MFF	1.0767	0.675735	0.712938	-0.648854	-0.273866	-1.54266	1	1533	1
1534	1534	ENSG00000214140|PRCD	1.09211	0.686506	0.729629	-0.719474	-0.308665	-1.48011	1	1534	1
1535	1535	ENSG00000128524|ATP6V1F	1.09266	0.575781	0.794481	-0.698376	-0.250285	-1.51426	1	1535	1
1536	1536	ENSG00000173141|MRPL57	1.0983	0.588085	0.791469	-0.75431	-0.242428	-1.48112	1	1536	1
1537	1537	ENSG00000130311|DDA1	1.13876	0.605936	0.741457	-0.755883	-0.265944	-1.46432	1	1537	1
1538	1538	ENSG00000164106|SCRG1	1.16437	0.641699	0.700782	-0.80262	-0.28423	-1.42	1	1538	1
1539	1539	ENSG00000113838|TBCCD1	1.07728	0.761805	0.61829	-0.615804	-0.287569	-1.554	1	1539	1
1540	1540	ENSG00000221821|C6orf226	1.07347	0.679416	0.678272	-0.516521	-0.314559	-1.60008	1	1540	1
1541	1541	ENSG00000119185|ITGB1BP1	1.04893	0.584634	0.715042	-0.586205	-0.12292	-1.63949	1	1541	1
1542	1542	ENSG00000107874|CUEDC2	0.959304	0.70696	0.727089	-0.646449	-0.129289	-1.61761	1	1542	1
1543	1543	ENSG00000141562|NARF	0.995428	0.618656	0.807587	-0.689354	-0.159575	-1.57274	1	1543	1
1544	1544	ENSG00000163882|POLR2H	1.06268	0.818791	0.667364	-0.916451	-0.276421	-1.35596	1	1544	1
1545	1545	ENSG00000182154|MRPL41	1.06688	0.782512	0.695426	-0.910365	-0.268899	-1.36556	1	1545	1
1546	1546	ENSG00000126432|PRDX5	1.00344	0.777359	0.697047	-0.910208	-0.13354	-1.4341	1	1546	1
1547	1547	ENSG00000214087|ARL16	1.00979	0.792355	0.684331	-0.857572	-0.173317	-1.45558	1	1547	1
1548	1548	ENSG00000057757|PITHD1	0.996864	0.864502	0.705461	-0.866745	-0.31861	-1.38147	1	1548	1
1549	1549	ENSG00000116586|LAMTOR2	1.01196	0.797645	0.754369	-0.877579	-0.305368	-1.38103	1	1549	1
1550	1550	ENSG00000141504|SAT2	0.971719	0.794714	0.801765	-0.855846	-0.316355	-1.396	1	1550	1
1551	1551	ENSG00000158793|NIT1	1.004	0.796567	0.775851	-0.832982	-0.351201	-1.39224	1	1551	1
1552	1552	ENSG00000161091|MFSD12	0.912016	0.78559	0.851282	-0.767034	-0.320597	-1.46126	1	1552	1
1553	1553	ENSG00000167700|MFSD3	0.979919	0.771513	0.805777	-0.80894	-0.320671	-1.4276	1	1553	1
1554	1554	ENSG00000103248|MTHFSD	1.00545	0.777368	0.785622	-0.777434	-0.366671	-1.42433	1	1554	1
1555	1555	ENSG00000140995|DEF8	0.977531	0.802104	0.801228	-0.757629	-0.400245	-1.42299	1	1555	1
1556	1556	ENSG00000232838|PET117	0.953073	0.806807	0.839469	-0.854863	-0.380512	-1.36397	1	1556	1
1557	1557	ENSG00000137106|GRHPR	0.996431	0.751174	0.851424	-0.833113	-0.400966	-1.36495	1	1557	1
1558	1558	ENSG00000153048|CARHSP1	0.967874	0.772317	0.852734	-0.808818	-0.395119	-1.38899	1	1558	1
1559	1559	ENSG00000129559|NEDD8	1.17783	0.628786	0.736119	-0.821035	-0.35132	-1.37038	1	1559	1
1560	1560	ENSG00000134291|TMEM106C	1.18692	0.664158	0.684953	-0.827864	-0.336077	-1.37209	1	1560	1
1561	1561	ENSG00000010270|STARD3NL	1.12514	0.73412	0.69354	-0.906718	-0.304768	-1.34131	1	1561	1
1562	1562	ENSG00000198937|CCDC167	1.09137	0.675582	0.772674	-0.899593	-0.271674	-1.36836	1	1562	1
1563	1563	ENSG00000141741|MIEN1	1.08716	0.783395	0.733104	-0.755966	-0.483124	-1.36457	1	1563	1
1564	1564	ENSG00000182636|NDN	1.05836	0.838204	0.703375	-0.727928	-0.48853	-1.38348	1	1564	1
1565	1565	ENSG00000104863|LIN7B	1.16767	0.753118	0.620148	-0.781364	-0.366853	-1.39272	1	1565	1
1566	1566	ENSG00000182087|TMEM259	1.132	0.807241	0.663442	-0.827706	-0.459463	-1.31551	1	1566	1
1567	1567	ENSG00000168591|TMUB2	1.21869	0.816636	0.504273	-0.985372	-0.321678	-1.23255	1	1567	1
1568	1568	ENSG00000033050|ABCF2	1.1406	0.912938	0.466997	-0.965796	-0.274322	-1.28042	1	1568	1
1569	1569	ENSG00000146232|NFKBIE	1.19311	0.842284	0.453749	-0.935291	-0.238806	-1.31505	1	1569	1
1570	1570	ENSG00000010322|NISCH	1.20654	0.88294	0.510718	-0.881041	-0.506106	-1.21305	1	1570	1
1571	1571	ENSG00000185917|SETD4	1.20066	0.843794	0.549108	-0.936454	-0.444514	-1.21259	1	1571	1
1572	1572	ENSG00000140067|FAM181A	1.1062	0.864275	0.623184	-0.96961	-0.374949	-1.2491	1	1572	1
1573	1573	ENSG00000083099|LYRM2	1.14648	0.855575	0.598661	-1.05376	-0.393861	-1.1531	1	1573	1
1574	1574	ENSG00000128626|MRPS12	1.16712	0.800183	0.630278	-1.01471	-0.392747	-1.19013	1	1574	1
1575	1575	ENSG00000105928|GSDME	1.25053	0.719908	0.476969	-0.931456	-0.177578	-1.33838	1	1575	1
1576	1576	ENSG00000130332|LSM7	1.17974	0.746617	0.508451	-0.913014	-0.128155	-1.39364	1	1576	1
1577	1577	ENSG00000186665|C17orf58	1.20268	0.714747	0.503578	-0.898289	-0.119928	-1.40279	1	1577	1
1578	1578	ENSG00000197620|CXorf40A	1.16326	0.7792	0.440898	-0.894989	-0.0598456	-1.42853	1	1578	1
1579	1579	ENSG00000198563|DDX39B	1.2405	0.754871	0.398998	-0.939648	-0.0984464	-1.35628	1	1579	1
1580	1580	ENSG00000128872|TMOD2	1.32068	0.702556	0.397368	-0.727861	-0.279859	-1.41288	1	1580	1
1581	1581	ENSG00000137185|ZSCAN9	1.28081	0.717118	0.493169	-0.852361	-0.303221	-1.33551	1	1581	1
1582	1582	ENSG00000169976|SF3B5	1.21507	0.701281	0.557602	-0.829371	-0.23889	-1.40569	1	1582	1
1583	1583	ENSG00000128581|IFT22	1.08574	0.95603	0.442543	-0.927706	-0.212987	-1.34362	1	1583	1
1584	1584	ENSG00000151327|FAM177A1	1.03785	0.96214	0.414464	-0.783503	-0.15159	-1.47936	1	1584	1
1585	1585	ENSG00000159692|CTBP1	1.13462	0.876691	0.385547	-0.843065	-0.114505	-1.43929	1	1585	1
1586	1586	ENSG00000157851|DPYSL5	1.07977	1.02933	0.317932	-0.771097	-0.233061	-1.42288	1	1586	1
1587	1587	ENSG00000196700|ZNF512B	1.04833	1.00288	0.327344	-0.68871	-0.179342	-1.5105	1	1587	1
1588	1588	ENSG00000143862|ARL8A	0.971887	1.1074	0.355237	-0.79402	-0.217414	-1.42309	1	1588	1
1589	1589	ENSG00000146574|CCZ1B	0.921994	1.16051	0.325461	-0.743154	-0.216315	-1.4485	1	1589	1
1590	1590	ENSG00000101152|DNAJC5	0.883038	1.13181	0.335814	-0.749043	-0.0998024	-1.50182	1	1590	1
1591	1591	ENSG00000137094|DNAJB5	0.890212	1.0919	0.439893	-0.813973	-0.145862	-1.46217	1	1591	1
1592	1592	ENSG00000100241|SBF1	0.950119	1.01982	0.546312	-0.584698	-0.440679	-1.49088	1	1592	1
1593	1593	ENSG00000127838|PNKD	0.900653	1.02199	0.630235	-0.581142	-0.503393	-1.46834	1	1593	1
1594	1594	ENSG00000177042|TMEM80	0.908908	1.04892	0.60713	-0.628616	-0.501719	-1.43463	1	1594	1
1595	1595	ENSG00000107175|CREB3	0.965774	0.868778	0.722331	-0.733129	-0.368633	-1.45512	1	1595	1
1596	1596	ENSG00000205220|PSMB10	1.01036	0.846994	0.684651	-0.724115	-0.353815	-1.46407	1	1596	1
1597	1597	ENSG00000183628|DGCR6	0.867532	0.910943	0.787144	-0.688589	-0.408326	-1.4687	1	1597	1
1598	1598	ENSG00000124357|NAGK	0.917572	0.891615	0.786662	-0.680433	-0.485029	-1.43039	1	1598	1
1599	1599	ENSG00000171135|JAGN1	0.917819	0.87963	0.787252	-0.671965	-0.464801	-1.44793	1	1599	1
1600	1600	ENSG00000118894|EEF2KMT	0.916032	0.930835	0.7397	-0.754537	-0.416126	-1.41591	1	1600	1
1601	1601	ENSG00000135709|KIAA0513	0.923261	0.89003	0.762097	-0.727672	-0.405152	-1.44256	1	1601	1
1602	1602	ENSG00000154710|RABGEF1	0.954334	0.907774	0.709904	-0.666687	-0.451848	-1.45348	1	1602	1
1603	1603	ENSG00000166311|SMPD1	0.956512	0.92025	0.729717	-0.726656	-0.486678	-1.39314	1	1603	1
1604	1604	ENSG00000160688|FLAD1	1.02606	0.976409	0.552905	-0.879512	-0.332796	-1.34307	1	1604	1
1605	1605	ENSG00000114735|HEMK1	0.917154	0.996343	0.640945	-0.822473	-0.327933	-1.40404	1	1605	1
1606	1606	ENSG00000134986|NREP	0.966657	0.983128	0.628389	-0.862603	-0.363577	-1.35199	1	1606	1
1607	1607	ENSG00000130921|C12orf65	0.962967	0.956447	0.569878	-0.876912	-0.188014	-1.42437	1	1607	1
1608	1608	ENSG00000130772|MED18	0.961216	1.0423	0.508344	-0.892221	-0.251434	-1.36821	1	1608	1
1609	1609	ENSG00000176101|SSNA1	0.959084	1.07616	0.467138	-0.821021	-0.285591	-1.39577	1	1609	1
1610	1610	ENSG00000006432|MAP3K9	1.08663	0.863968	0.46305	-0.628147	-0.23329	-1.55222	1	1610	1
1611	1611	ENSG00000169689|CENPX	1.08139	0.855723	0.531027	-0.723247	-0.251582	-1.49331	1	1611	1
1612	1612	ENSG00000196510|ANAPC7	1.0906	0.831168	0.521411	-0.753205	-0.19208	-1.49789	1	1612	1
1613	1613	ENSG00000149182|ARFGAP2	0.955549	0.870315	0.573801	-0.630963	-0.163948	-1.60475	1	1613	1
1614	1614	ENSG00000162373|BEND5	0.989134	0.888568	0.530148	-0.644212	-0.181538	-1.5821	1	1614	1
1615	1615	ENSG00000124733|MEA1	0.977602	0.911366	0.586195	-0.721842	-0.239495	-1.51383	1	1615	1
1616	1616	ENSG00000220205|VAMP2	0.935421	1.0026	0.520634	-0.686859	-0.250559	-1.52124	1	1616	1
1617	1617	ENSG00000132510|KDM6B	1.11906	0.910373	-0.239337	-0.30677	0.171404	-1.65473	1	1617	1
1618	1618	ENSG00000173621|LRFN4	1.12751	1.02835	-0.0821117	-0.323169	-0.158417	-1.59216	1	1618	1
1619	1619	ENSG00000213923|CSNK1E	1.1207	1.03542	-0.0934742	-0.475124	-0.0265113	-1.56101	1	1619	1
1620	1620	ENSG00000213563|C8orf82	0.960647	1.20647	-0.440844	-0.396366	0.167453	-1.49736	1	1620	1
1621	1621	ENSG00000137817|PARP6	1.0954	1.19391	-0.371009	-0.445672	-0.045637	-1.427	1	1621	1
1622	1622	ENSG00000188573|FBLL1	1.12379	1.15222	-0.187267	-0.573567	-0.0876803	-1.4275	1	1622	1
1623	1623	ENSG00000169683|LRRC45	0.651774	1.47439	-0.491008	-0.172796	-0.00276778	-1.45959	1	1623	1
1624	1624	ENSG00000067840|PDZD4	0.777476	1.45791	-0.259642	-0.355725	-0.192018	-1.428	1	1624	1
1625	1625	ENSG00000132017|DCAF15	0.849739	1.43133	-0.280654	-0.423744	-0.185026	-1.39164	1	1625	1
1626	1626	ENSG00000099864|PALM	0.881348	1.42135	-0.329325	-0.233585	-0.356806	-1.38299	1	1626	1
1627	1627	ENSG00000158717|RNF166	0.808441	1.4276	-0.371333	-0.113093	-0.317393	-1.43422	1	1627	1
1628	1628	ENSG00000100350|FOXRED2	0.687899	1.33747	-0.085882	-0.346901	0.0228731	-1.61546	1	1628	1
1629	1629	ENSG00000108819|PPP1R9B	0.75791	1.39211	-0.0754804	-0.525561	-0.0652634	-1.48372	1	1629	1
1630	1630	ENSG00000141622|RNF165	0.766614	1.39991	-0.233289	-0.406706	-0.0326501	-1.49388	1	1630	1
1631	1631	ENSG00000163013|FBXO41	1.00103	1.09946	-0.185102	-0.205	-0.0645867	-1.6458	1	1631	1
1632	1632	ENSG00000177706|FAM20C	0.814722	1.26822	-0.245402	-0.128451	-0.0829705	-1.62612	1	1632	1
1633	1633	ENSG00000175130|MARCKSL1	1.17233	1.1403	-0.602307	-0.783135	0.214433	-1.14162	1	1633	1
1634	1634	ENSG00000128989|ARPP19	1.23623	1.05454	-0.240799	-0.96995	0.0835495	-1.16357	1	1634	1
1635	1635	ENSG00000159335|PTMS	1.23091	0.906758	-0.349539	-0.976311	0.387117	-1.19893	1	1635	1
1636	1636	ENSG00000184545|DUSP8	1.22928	1.04775	-0.464856	-0.589947	0.123743	-1.34597	1	1636	1
1637	1637	ENSG00000182175|RGMA	1.23163	0.992015	-0.311664	-0.837702	0.212222	-1.2865	1	1637	1
1638	1638	ENSG00000198720|ANKRD13B	1.22244	0.997055	-0.274219	-0.694027	0.139838	-1.39108	1	1638	1
1639	1639	ENSG00000155755|TMEM237	1.42112	0.739108	-0.285769	-0.775379	0.207852	-1.30693	1	1639	1
1640	1640	ENSG00000204469|PRRC2A	1.51034	0.855292	-0.401419	-0.788185	-0.0813437	-1.09469	1	1640	1
1641	1641	ENSG00000184986|TMEM121	1.36113	1.06322	-0.742735	-0.338221	-0.198152	-1.14524	1	1641	1
1642	1642	ENSG00000115266|APC2	1.20533	1.21817	-0.555554	-0.575482	-0.103933	-1.18853	1	1642	1
1643	1643	ENSG00000167771|RCOR2	1.25516	1.1665	-0.421544	-0.39203	-0.335275	-1.27281	1	1643	1
1644	1644	ENSG00000197177|ADGRA1	1.11679	1.30119	-0.508714	-0.307318	-0.340915	-1.26104	1	1644	1
1645	1645	ENSG00000180035|ZNF48	1.25583	1.16055	-0.359864	-0.652121	-0.184963	-1.21944	1	1645	1
1646	1646	ENSG00000174871|CNIH2	1.36503	1.07801	-0.290284	-0.674298	-0.32526	-1.15319	1	1646	1
1647	1647	ENSG00000204256|BRD2	1.31076	1.14345	-0.362495	-0.780957	-0.222894	-1.08786	1	1647	1
1648	1648	ENSG00000100335|MIEF1	1.12796	1.2564	-0.174861	-0.779388	-0.220827	-1.20929	1	1648	1
1649	1649	ENSG00000124120|TTPAL	1.12975	1.22956	-0.136371	-0.690744	-0.245357	-1.28683	1	1649	1
1650	1650	ENSG00000133606|MKRN1	1.09352	1.29354	-0.032513	-0.746011	-0.430283	-1.17824	1	1650	1
1651	1651	ENSG00000214022|REPIN1	1.09059	1.32257	-0.157124	-0.785562	-0.323863	-1.14662	1	1651	1
1652	1652	ENSG00000089351|GRAMD1A	1.21889	1.12714	-0.0642275	-0.443085	-0.499238	-1.33947	1	1652	1
1653	1653	ENSG00000120049|KCNIP2	1.15878	1.18608	0.0578783	-0.623016	-0.518881	-1.26084	1	1653	1
1654	1654	ENSG00000124074|ENKD1	1.12967	1.24249	-0.038029	-0.616314	-0.456839	-1.26098	1	1654	1
1655	1655	ENSG00000169221|TBC1D10B	1.16644	1.09061	-0.0776519	-0.414668	-0.284509	-1.48022	1	1655	1
1656	1656	ENSG00000186648|CARMIL3	1.14251	1.1488	-0.0541511	-0.430234	-0.376976	-1.42996	1	1656	1
1657	1657	ENSG00000055118|KCNH2	1.19734	1.08322	-0.161677	-0.458981	-0.206031	-1.45388	1	1657	1
1658	1658	ENSG00000184009|ACTG1	1.28438	1.05437	-0.244163	-0.422634	-0.287032	-1.38493	1	1658	1
1659	1659	ENSG00000162032|SPSB3	0.413172	1.04322	0.613333	-0.025528	-0.223729	-1.82047	1	1659	1
1660	1660	ENSG00000116809|ZBTB17	0.208427	1.11214	0.697797	-0.164111	-0.0649397	-1.78931	1	1660	1
1661	1661	ENSG00000131748|STARD3	0.227478	1.22167	0.489807	-0.0426804	-0.106677	-1.7896	1	1661	1
1662	1662	ENSG00000135596|MICAL1	0.27475	1.5352	0.350458	-0.202628	-0.485258	-1.47252	1	1662	1
1663	1663	ENSG00000262660|AC139530.2	0.467048	1.51961	0.24322	-0.446517	-0.333136	-1.45022	1	1663	1
1664	1664	ENSG00000140400|MAN2C1	0.321802	1.53502	0.292935	-0.302749	-0.350365	-1.49664	1	1664	1
1665	1665	ENSG00000177380|PPFIA3	0.245547	1.58254	0.242692	-0.355884	-0.233234	-1.48166	1	1665	1
1666	1666	ENSG00000283496|ZNF511-PRAP1	0.275494	1.57917	0.2622	-0.380762	-0.272405	-1.46369	1	1666	1
1667	1667	ENSG00000103168|TAF1C	0.309789	1.3495	0.442684	-0.090033	-0.352197	-1.65975	1	1667	1
1668	1668	ENSG00000139636|LMBR1L	0.375182	1.28135	0.524859	-0.226058	-0.277975	-1.67736	1	1668	1
1669	1669	ENSG00000019144|PHLDB1	0.20334	1.4979	0.228894	-0.160997	-0.152536	-1.6166	1	1669	1
1670	1670	ENSG00000051620|HEBP2	0.416726	1.36586	0.2615	-0.36418	-0.0187654	-1.66114	1	1670	1
1671	1671	ENSG00000179292|TMEM151A	0.310684	1.44523	0.207984	-0.269659	-0.05226	-1.64198	1	1671	1
1672	1672	ENSG00000125966|MMP24	0.380856	1.26033	0.241329	0.194256	-0.326317	-1.75045	1	1672	1
1673	1673	ENSG00000234465|PINLYP	0.810627	1.28799	-0.0624625	0.00709932	-0.477296	-1.56595	1	1673	1
1674	1674	ENSG00000131408|NR1H2	0.682965	1.15614	0.333228	-0.0114024	-0.467716	-1.69321	1	1674	1
1675	1675	ENSG00000159761|C16orf86	0.730866	1.22562	0.244974	0.0351164	-0.670344	-1.56623	1	1675	1
1676	1676	ENSG00000172350|ABCG4	0.713784	1.1836	0.240119	0.11942	-0.643273	-1.61365	1	1676	1
1677	1677	ENSG00000133315|MACROD1	0.848478	0.88686	0.344908	-0.232255	-0.0259067	-1.82208	1	1677	1
1678	1678	ENSG00000174151|CYB561D1	0.85302	0.95163	0.410399	-0.262901	-0.193843	-1.75831	1	1678	1
1679	1679	ENSG00000162490|DRAXIN	0.916506	0.920129	0.107334	-0.152178	0.0188292	-1.81062	1	1679	1
1680	1680	ENSG00000162734|PEA15	0.996473	0.859999	0.158914	-0.0646885	-0.158222	-1.79248	1	1680	1
1681	1681	ENSG00000185504|FAAP100	0.839287	1.17287	0.197711	-0.279177	-0.280083	-1.65061	1	1681	1
1682	1682	ENSG00000064607|SUGP2	0.889941	1.21667	0.0503454	-0.303485	-0.2502	-1.60327	1	1682	1
1683	1683	ENSG00000178233|TMEM151B	0.885039	1.22283	0.0421775	-0.2682	-0.278732	-1.60312	1	1683	1
1684	1684	ENSG00000005379|TSPOAP1	0.805834	1.34614	-0.0354811	-0.328199	-0.249722	-1.53857	1	1684	1
1685	1685	ENSG00000105085|MED26	0.845754	1.28549	0.0465199	-0.220734	-0.401294	-1.55573	1	1685	1
1686	1686	ENSG00000110925|CSRNP2	0.947408	1.0799	0.289182	-0.283861	-0.422078	-1.61055	1	1686	1
1687	1687	ENSG00000148384|INPP5E	0.997341	1.00457	0.194052	-0.226881	-0.288697	-1.68038	1	1687	1
1688	1688	ENSG00000160233|LRRC3	0.929254	1.04652	0.172489	-0.0878164	-0.366474	-1.69397	1	1688	1
1689	1689	ENSG00000100413|POLR3H	0.716564	1.28589	0.222591	-0.338867	-0.27607	-1.61011	1	1689	1
1690	1690	ENSG00000034053|APBA2	0.701563	1.21373	0.292113	-0.25896	-0.27278	-1.67567	1	1690	1
1691	1691	ENSG00000125503|PPP1R12C	0.68533	1.24137	0.28543	-0.300446	-0.252163	-1.65952	1	1691	1
1692	1692	ENSG00000164080|RAD54L2	0.705016	1.14024	0.27605	-0.145235	-0.228727	-1.74734	1	1692	1
1693	1693	ENSG00000171813|PWWP2B	0.723488	1.19439	0.0975247	-0.000381422	-0.296769	-1.71826	1	1693	1
1694	1694	ENSG00000167654|ATCAY	0.871409	1.02806	-0.0537074	0.200458	-0.299522	-1.7467	1	1694	1
1695	1695	ENSG00000105419|MEIS3	1.09581	0.993717	-0.14729	0.0824506	-0.406721	-1.61797	1	1695	1
1696	1696	ENSG00000179364|PACS2	1.07716	0.879034	-0.112507	0.143382	-0.265656	-1.72141	1	1696	1
1697	1697	ENSG00000198680|TUSC1	1.09888	0.924029	-0.158242	0.0767618	-0.25547	-1.68596	1	1697	1
1698	1698	ENSG00000166165|CKB	1.27222	0.725178	0.10215	-0.227214	-0.214824	-1.65751	1	1698	1
1699	1699	ENSG00000177000|MTHFR	1.32265	0.641321	0.122481	-0.0827703	-0.365414	-1.63827	1	1699	1
1700	1700	ENSG00000107140|TESK1	1.19233	0.938128	0.131085	-0.372321	-0.329036	-1.56019	1	1700	1
1701	1701	ENSG00000125650|PSPN	1.21364	0.817277	0.229355	-0.361391	-0.288731	-1.61015	1	1701	1
1702	1702	ENSG00000182272|B4GALNT4	1.1054	0.900975	0.115007	-0.234234	-0.196054	-1.6911	1	1702	1
1703	1703	ENSG00000186193|SAPCD2	1.11499	1.00513	0.0653345	-0.246284	-0.336589	-1.60259	1	1703	1
1704	1704	ENSG00000142459|EVI5L	0.6925	1.31058	0.29109	-0.00619801	-0.919635	-1.36833	1	1704	1
1705	1705	ENSG00000243444|PALM2	0.834262	1.19352	0.297003	0.0124369	-0.995631	-1.34159	1	1705	1
1706	1706	ENSG00000108840|HDAC5	0.747706	1.13975	0.203649	0.282641	-0.868127	-1.50562	1	1706	1
1707	1707	ENSG00000197696|NMB	0.871821	1.26653	-0.0327176	0.124098	-0.856482	-1.37325	1	1707	1
1708	1708	ENSG00000079689|SCGN	1.05832	0.736452	0.324566	0.0912997	-0.480641	-1.73	1	1708	1
1709	1709	ENSG00000164638|SLC29A4	1.20521	0.82374	0.133075	-0.0111853	-0.556747	-1.59409	1	1709	1
1710	1710	ENSG00000176619|LMNB2	1.29792	0.750388	0.153402	-0.126067	-0.509254	-1.56639	1	1710	1
1711	1711	ENSG00000221838|AP4M1	0.93862	1.06539	0.25167	-0.00898784	-0.677981	-1.56871	1	1711	1
1712	1712	ENSG00000171798|KNDC1	1.07952	0.992817	0.213089	-0.125152	-0.603433	-1.55684	1	1712	1
1713	1713	ENSG00000272636|DOC2B	1.01777	1.11397	0.184382	-0.217435	-0.580464	-1.51822	1	1713	1
1714	1714	ENSG00000100060|MFNG	0.980806	0.880602	0.546134	-0.126197	-0.724678	-1.55667	1	1714	1
1715	1715	ENSG00000148339|SLC25A25	1.14944	0.880515	0.370817	-0.201493	-0.707877	-1.4914	1	1715	1
1716	1716	ENSG00000158106|RHPN1	1.11133	0.916298	0.261318	-0.0201334	-0.758319	-1.5105	1	1716	1
1717	1717	ENSG00000141258|SGSM2	1.22497	0.879016	0.0655229	0.135372	-0.997654	-1.30723	1	1717	1
1718	1718	ENSG00000064547|LPAR2	1.13885	0.821803	0.106117	0.241116	-0.769825	-1.53806	1	1718	1
1719	1719	ENSG00000173020|GRK2	1.07352	0.915632	0.0708758	0.215808	-0.709055	-1.56678	1	1719	1
1720	1720	ENSG00000188157|AGRN	1.20419	1.0657	-0.225657	-0.147891	-0.426927	-1.46941	1	1720	1
1721	1721	ENSG00000103043|VAC14	1.05742	1.21097	-0.047307	-0.233408	-0.556083	-1.43159	1	1721	1
1722	1722	ENSG00000214655|ZSWIM8	0.992995	1.22536	-0.00194477	-0.201201	-0.53779	-1.47742	1	1722	1
1723	1723	ENSG00000105429|MEGF8	1.11661	1.04391	0.273193	-0.348958	-0.65903	-1.42573	1	1723	1
1724	1724	ENSG00000162873|KLHDC8A	0.995677	1.20635	0.185046	-0.315216	-0.666161	-1.40569	1	1724	1
1725	1725	ENSG00000178947|SMIM10L2A	1.13153	1.11649	0.125885	-0.269876	-0.759623	-1.3444	1	1725	1
1726	1726	ENSG00000133612|AGAP3	1.2595	1.0387	-0.0523349	-0.250197	-0.624969	-1.3707	1	1726	1
1727	1727	ENSG00000100226|GTPBP1	1.20744	0.965254	0.168138	-0.256497	-0.627398	-1.45694	1	1727	1
1728	1728	ENSG00000176871|WSB2	1.22496	0.934101	0.135716	-0.139058	-0.713452	-1.44227	1	1728	1
1729	1729	ENSG00000151743|AMN1	0.534107	0.250207	1.60401	-0.797127	-0.497363	-1.09384	1	1729	1
1730	1730	ENSG00000101294|HM13	0.399334	0.234454	1.70871	-0.924463	-0.655058	-0.762979	1	1730	1
1731	1731	ENSG00000188674|C2orf80	0.474568	0.15847	1.67982	-0.976386	-0.466416	-0.870057	1	1731	1
1732	1732	ENSG00000231389|HLA-DPA1	0.426474	-0.0953015	1.77601	-0.963522	-0.381488	-0.762176	1	1732	1
1733	1733	ENSG00000117262|GPR89A	0.52854	-0.119409	1.76339	-0.707958	-0.624636	-0.839925	1	1733	1
1734	1734	ENSG00000166741|NNMT	0.587676	0.0531229	1.68399	-0.73314	-0.718885	-0.872762	1	1734	1
1735	1735	ENSG00000162493|PDPN	-0.0850191	0.00896774	1.82272	-1.06365	0.0495079	-0.732527	1	1735	1
1736	1736	ENSG00000048162|NOP16	0.0493096	0.2684	1.68218	-1.34149	-0.129849	-0.528546	1	1736	1
1737	1737	ENSG00000167642|SPINT2	0.231744	0.323569	1.5632	-1.32568	0.00749961	-0.800327	1	1737	1
1738	1738	ENSG00000236444|UBE2L5	0.292197	0.209862	1.50271	-1.47135	0.124013	-0.657431	1	1738	1
1739	1739	ENSG00000161542|PRPSAP1	0.158077	0.656586	1.27651	-0.526247	0.0580624	-1.62299	1	1739	1
1740	1740	ENSG00000164068|RNF123	0.191056	0.872844	1.20399	-0.583887	-0.137305	-1.5467	1	1740	1
1741	1741	ENSG00000147439|BIN3	0.3122	0.787579	1.19712	-0.307713	-0.371679	-1.61751	1	1741	1
1742	1742	ENSG00000224712|NPIPA3	0.385	0.463757	1.34197	-0.405259	-0.158701	-1.62677	1	1742	1
1743	1743	ENSG00000285762|AC253536.7	0.567696	0.44845	1.38011	-0.58339	-0.364057	-1.44881	1	1743	1
1744	1744	ENSG00000166411|IDH3A	0.663485	0.289987	1.3946	-0.475532	-0.411177	-1.46136	1	1744	1
1745	1745	ENSG00000240682|ISY1	0.622049	0.338003	1.39584	-0.480049	-0.408481	-1.46736	1	1745	1
1746	1746	ENSG00000114520|SNX4	0.582315	0.45081	1.33591	-0.698915	-0.206612	-1.46351	1	1746	1
1747	1747	ENSG00000148481|MINDY3	0.632107	0.460864	1.30921	-0.731522	-0.225675	-1.44498	1	1747	1
1748	1748	ENSG00000140987|ZSCAN32	0.619919	0.521548	1.35002	-0.81118	-0.365082	-1.31523	1	1748	1
1749	1749	ENSG00000051596|THOC3	0.785862	0.420795	1.28783	-0.821669	-0.350316	-1.3225	1	1749	1
1750	1750	ENSG00000132768|DPH2	0.705381	0.38619	1.35681	-0.78371	-0.32608	-1.33859	1	1750	1
1751	1751	ENSG00000109083|IFT20	0.666032	0.392915	1.37759	-0.880043	-0.269113	-1.28738	1	1751	1
1752	1752	ENSG00000158773|USF1	0.730151	0.420384	1.29067	-0.86051	-0.227071	-1.35362	1	1752	1
1753	1753	ENSG00000126756|UXT	0.736093	0.467234	1.31488	-0.970154	-0.343031	-1.20502	1	1753	1
1754	1754	ENSG00000237651|C2orf74	0.755994	0.551957	1.25823	-0.989972	-0.389109	-1.1871	1	1754	1
1755	1755	ENSG00000136156|ITM2B	0.681228	0.342831	1.44444	-0.95542	-0.386089	-1.12699	1	1755	1
1756	1756	ENSG00000130150|MOSPD2	0.595634	0.478011	1.44488	-0.919043	-0.479397	-1.12008	1	1756	1
1757	1757	ENSG00000166788|SAAL1	0.630822	0.509523	1.39749	-0.834169	-0.503702	-1.19996	1	1757	1
1758	1758	ENSG00000101439|CST3	0.364087	0.603777	1.42862	-0.791502	-0.279291	-1.32569	1	1758	1
1759	1759	ENSG00000197713|RPE	0.516736	0.608586	1.31651	-0.940693	-0.194777	-1.30636	1	1759	1
1760	1760	ENSG00000112130|RNF8	0.513074	0.443464	1.36881	-0.953327	-0.0471082	-1.32491	1	1760	1
1761	1761	ENSG00000145882|PCYOX1L	0.483267	0.454741	1.427	-1.01501	-0.13564	-1.21436	1	1761	1
1762	1762	ENSG00000168303|MPLKIP	0.670614	0.723833	1.0265	-1.10999	0.0083201	-1.31927	1	1762	1
1763	1763	ENSG00000168374|ARF4	0.762966	0.626762	1.03068	-1.09735	0.00305154	-1.32611	1	1763	1
1764	1764	ENSG00000133872|SARAF	0.72296	0.586567	1.13583	-1.01399	-0.0869679	-1.3444	1	1764	1
1765	1765	ENSG00000116455|WDR77	0.722884	0.555093	1.13015	-1.11685	-0.00883491	-1.28244	1	1765	1
1766	1766	ENSG00000143727|ACP1	0.755524	0.527792	1.10911	-1.11282	0.017248	-1.29686	1	1766	1
1767	1767	ENSG00000147121|KRBOX4	0.495924	0.67782	1.13817	-1.08102	0.117028	-1.34793	1	1767	1
1768	1768	ENSG00000244045|TMEM199	0.593278	0.674568	1.07614	-1.11994	0.106126	-1.33018	1	1768	1
1769	1769	ENSG00000099624|ATP5F1D	0.536689	0.650723	1.11666	-0.92722	0.09706	-1.47392	1	1769	1
1770	1770	ENSG00000119865|CNRIP1	0.551363	0.653657	1.06328	-1.0146	0.186435	-1.44014	1	1770	1
1771	1771	ENSG00000132581|SDF2	0.701334	0.327584	1.24632	-1.00967	0.0838886	-1.34946	1	1771	1
1772	1772	ENSG00000141428|C18orf21	0.713092	0.431825	1.20251	-0.944651	-0.000413322	-1.40236	1	1772	1
1773	1773	ENSG00000113621|TXNDC15	0.756819	0.366091	1.12418	-0.858126	0.120516	-1.50948	1	1773	1
1774	1774	ENSG00000156239|N6AMT1	0.733443	0.390693	1.12722	-0.918262	0.141853	-1.47495	1	1774	1
1775	1775	ENSG00000055950|MRPL43	0.816347	0.296425	1.11444	-1.02206	0.18257	-1.38772	1	1775	1
1776	1776	ENSG00000136261|BZW2	0.848641	0.30542	1.08448	-0.95574	0.156781	-1.43958	1	1776	1
1777	1777	ENSG00000118680|MYL12B	0.761886	0.342846	1.10625	-1.13072	0.239675	-1.31994	1	1777	1
1778	1778	ENSG00000155959|VBP1	0.704815	0.344527	1.16441	-1.16896	0.224741	-1.26954	1	1778	1
1779	1779	ENSG00000067560|RHOA	0.783377	0.439491	1.2021	-1.12169	-0.0856551	-1.21762	1	1779	1
1780	1780	ENSG00000285932|AL133353.2	0.688396	0.40883	1.26393	-1.13657	-0.0123464	-1.21223	1	1780	1
1781	1781	ENSG00000111911|HINT3	0.752542	0.398332	1.21825	-1.08774	-0.0135052	-1.26787	1	1781	1
1782	1782	ENSG00000125812|GZF1	0.727218	0.371848	1.22916	-1.10728	0.0416821	-1.26263	1	1782	1
1783	1783	ENSG00000113712|CSNK1A1	0.379865	0.61469	1.02126	-1.12164	0.495529	-1.3897	1	1783	1
1784	1784	ENSG00000163644|PPM1K	0.457856	0.688706	0.994295	-1.15295	0.374999	-1.3629	1	1784	1
1785	1785	ENSG00000120727|PAIP2	0.570534	0.541013	0.957041	-1.13096	0.465857	-1.40349	1	1785	1
1786	1786	ENSG00000102804|TSC22D1	0.606709	0.429082	0.934313	-1.21072	0.574425	-1.33381	1	1786	1
1787	1787	ENSG00000169714|CNBP	0.555799	0.382597	1.04587	-1.11897	0.522447	-1.38774	1	1787	1
1788	1788	ENSG00000140905|GCSH	0.603282	0.431076	1.20566	-1.22525	0.192787	-1.20756	1	1788	1
1789	1789	ENSG00000173409|ARV1	0.539019	0.613689	1.19026	-1.28368	0.0650098	-1.12431	1	1789	1
1790	1790	ENSG00000104671|DCTN6	0.550989	0.380946	1.16639	-1.3751	0.358935	-1.08216	1	1790	1
1791	1791	ENSG00000147571|CRH	0.44083	0.340285	1.21624	-1.2118	0.453874	-1.23943	1	1791	1
1792	1792	ENSG00000136003|ISCU	0.69195	0.288226	1.10091	-1.01802	0.369769	-1.43284	1	1792	1
1793	1793	ENSG00000143742|SRP9	0.827812	0.0672694	1.10153	-1.01109	0.398563	-1.38409	1	1793	1
1794	1794	ENSG00000071539|TRIP13	0.500366	0.0232233	1.2709	-0.788054	0.498389	-1.50482	1	1794	1
1795	1795	ENSG00000162642|C1orf52	0.614767	0.0271044	1.36737	-1.02607	0.288004	-1.27117	1	1795	1
1796	1796	ENSG00000015479|MATR3	0.203459	0.365026	1.49343	-0.911045	0.167111	-1.31798	1	1796	1
1797	1797	ENSG00000198912|C1orf174	0.350811	0.331278	1.47539	-1.10771	0.112455	-1.16222	1	1797	1
1798	1798	ENSG00000066136|NFYC	0.514108	-0.00749771	1.50786	-0.660389	0.0676453	-1.42173	1	1798	1
1799	1799	ENSG00000132207|SLX1A	0.31251	0.0963204	1.59781	-0.838743	0.106919	-1.27481	1	1799	1
1800	1800	ENSG00000120837|NFYB	0.665305	-0.0927727	1.42289	-1.49564	0.0349982	-0.534772	1	1800	1
1801	1801	ENSG00000115541|HSPE1	0.809536	-0.0192566	1.2986	-1.5157	0.0267164	-0.599891	1	1801	1
1802	1802	ENSG00000131469|RPL27	0.75832	-0.10186	1.28172	-1.59557	0.117844	-0.460456	1	1802	1
1803	1803	ENSG00000145425|RPS3A	0.822356	-0.195894	1.43153	-1.3487	-0.0669666	-0.642326	1	1803	1
1804	1804	ENSG00000170312|CDK1	0.764658	-0.21445	1.47558	-1.30949	-0.0259882	-0.690307	1	1804	1
1805	1805	ENSG00000205323|SARNP	0.834751	-0.11983	1.2939	-1.34557	0.208822	-0.872067	1	1805	1
1806	1806	ENSG00000124614|RPS10	0.667399	-0.216969	1.39828	-1.39894	0.272169	-0.721945	1	1806	1
1807	1807	ENSG00000189050|RNFT1	0.668335	-0.0850582	1.43925	-1.39171	0.096182	-0.727006	1	1807	1
1808	1808	ENSG00000116750|UCHL5	0.725865	-0.0642727	1.44523	-1.12604	0.0714769	-1.05226	1	1808	1
1809	1809	ENSG00000185272|RBM11	0.67188	-0.104767	1.58357	-1.0705	-0.152448	-0.927736	1	1809	1
1810	1810	ENSG00000116251|RPL22	0.717359	0.0203533	1.51774	-1.29113	-0.324874	-0.639445	1	1810	1
1811	1811	ENSG00000242616|GNG10	0.464764	-0.0580775	1.66461	-1.2317	-0.155076	-0.68452	1	1811	1
1812	1812	ENSG00000115486|GGCX	1.04853	0.122603	1.11285	-1.49072	-0.161862	-0.6314	1	1812	1
1813	1813	ENSG00000136159|NUDT15	0.997126	0.268812	1.031	-1.61378	-0.213376	-0.469781	1	1813	1
1814	1814	ENSG00000153140|CETN3	0.902083	0.207638	1.00886	-1.70833	0.0426684	-0.452914	1	1814	1
1815	1815	ENSG00000170144|HNRNPA3	0.957535	-0.014899	1.1065	-1.64579	-0.0165133	-0.386832	1	1815	1
1816	1816	ENSG00000197045|GMFB	1.02493	0.0269431	1.04802	-1.65881	-0.192889	-0.248194	1	1816	1
1817	1817	ENSG00000123545|NDUFAF4	0.837051	0.323455	1.15097	-1.56679	-0.109797	-0.634891	1	1817	1
1818	1818	ENSG00000138459|SLC35A5	0.817166	0.458115	1.10368	-1.53448	-0.11155	-0.73293	1	1818	1
1819	1819	ENSG00000180964|TCEAL8	0.868521	0.536913	1.02298	-1.52191	-0.150087	-0.756422	1	1819	1
1820	1820	ENSG00000102054|RBBP7	0.747423	0.442819	1.29081	-1.34206	-0.315228	-0.823767	1	1820	1
1821	1821	ENSG00000101132|PFDN4	0.83299	0.434382	1.20576	-1.40033	-0.284214	-0.788588	1	1821	1
1822	1822	ENSG00000185515|BRCC3	0.868263	0.340244	1.22217	-1.40263	-0.248644	-0.779407	1	1822	1
1823	1823	ENSG00000134049|IER3IP1	0.923975	0.451545	1.13104	-1.31034	-0.25851	-0.937715	1	1823	1
1824	1824	ENSG00000152932|RAB3C	0.954097	0.368916	1.13203	-1.33675	-0.198651	-0.919637	1	1824	1
1825	1825	ENSG00000100528|CNIH1	0.896655	0.407618	1.16178	-1.35055	-0.215715	-0.899787	1	1825	1
1826	1826	ENSG00000241127|YAE1	0.928013	0.424652	1.11637	-1.35818	-0.201505	-0.909354	1	1826	1
1827	1827	ENSG00000114209|PDCD10	0.770834	0.517958	1.16083	-1.40556	-0.155021	-0.889036	1	1827	1
1828	1828	ENSG00000133065|SLC41A1	0.799871	0.425798	1.2201	-1.35408	-0.184698	-0.90699	1	1828	1
1829	1829	ENSG00000105640|RPL18A	0.843179	0.284926	1.17037	-1.36326	0.0531193	-0.988338	1	1829	1
1830	1830	ENSG00000167863|ATP5PD	0.880917	0.324737	1.14851	-1.32855	-0.00858228	-1.01702	1	1830	1
1831	1831	ENSG00000111196|MAGOHB	0.812749	0.374858	1.09821	-1.49081	0.0791029	-0.874112	1	1831	1
1832	1832	ENSG00000137364|TPMT	0.738723	0.48964	1.14775	-1.43803	-0.0278538	-0.910221	1	1832	1
1833	1833	ENSG00000109180|OCIAD1	0.812061	0.422425	1.14961	-1.3994	-0.0465914	-0.938104	1	1833	1
1834	1834	ENSG00000183726|TMEM50A	0.843466	0.410191	1.09705	-1.43689	0.00925184	-0.923074	1	1834	1
1835	1835	ENSG00000171497|PPID	1.03669	0.346941	1.00972	-1.46163	-0.13801	-0.793703	1	1835	1
1836	1836	ENSG00000117477|CCDC181	1.017	0.371318	1.02094	-1.4075	-0.111836	-0.889918	1	1836	1
1837	1837	ENSG00000177700|POLR2L	1.01635	0.442038	0.979963	-1.42051	-0.137798	-0.880041	1	1837	1
1838	1838	ENSG00000154518|ATP5MC3	1.00893	0.210349	1.13172	-1.29974	-0.0700423	-0.981214	1	1838	1
1839	1839	ENSG00000157456|CCNB2	0.999737	0.20468	1.12883	-1.34145	-0.0525755	-0.939218	1	1839	1
1840	1840	ENSG00000096746|HNRNPH3	0.983763	0.268692	1.18273	-1.22752	-0.200651	-1.00701	1	1840	1
1841	1841	ENSG00000183291|SELENOF	1.01931	0.288091	1.13098	-1.31722	-0.217568	-0.90359	1	1841	1
1842	1842	ENSG00000110700|RPS13	0.821367	0.00739144	1.3493	-1.38344	-0.0264333	-0.768181	1	1842	1
1843	1843	ENSG00000102471|NDFIP2	0.85342	0.062511	1.26872	-1.35431	0.0743402	-0.904683	1	1843	1
1844	1844	ENSG00000114686|MRPL3	0.823587	0.218406	1.26504	-1.3665	-0.0436319	-0.896907	1	1844	1
1845	1845	ENSG00000146066|HIGD2A	0.78306	0.17519	1.29259	-1.3855	0.00967694	-0.875017	1	1845	1
1846	1846	ENSG00000115446|UNC50	1.07664	0.203771	0.975807	-1.45328	0.0528126	-0.855748	1	1846	1
1847	1847	ENSG00000162385|MAGOH	1.14978	0.10229	0.982542	-1.4465	-0.00725692	-0.780856	1	1847	1
1848	1848	ENSG00000112096|SOD2	0.962526	0.188302	1.0332	-1.48701	0.159656	-0.856673	1	1848	1
1849	1849	ENSG00000177879|AP3S1	0.950797	0.27638	0.97933	-1.45922	0.197309	-0.944601	1	1849	1
1850	1850	ENSG00000065548|ZC3H15	0.991939	0.349347	0.977651	-1.46029	0.0381857	-0.896832	1	1850	1
1851	1851	ENSG00000090060|PAPOLA	0.994875	0.307338	1.02276	-1.3971	0.0296987	-0.957571	1	1851	1
1852	1852	ENSG00000158050|DUSP2	0.938791	0.268412	1.10106	-1.39606	0.0282899	-0.940487	1	1852	1
1853	1853	ENSG00000111229|ARPC3	0.960868	0.160728	1.15499	-1.19496	0.0524939	-1.13412	1	1853	1
1854	1854	ENSG00000213619|NDUFS3	1.0223	0.0772549	1.17456	-1.08417	-0.0093314	-1.18061	1	1854	1
1855	1855	ENSG00000125863|MKKS	0.980522	0.153338	1.19272	-1.14301	-0.0506813	-1.13289	1	1855	1
1856	1856	ENSG00000137563|GGH	0.976448	0.168649	1.19133	-1.12724	-0.0581944	-1.151	1	1856	1
1857	1857	ENSG00000137876|RSL24D1	0.887618	0.200278	1.24611	-1.20192	-0.04942	-1.08267	1	1857	1
1858	1858	ENSG00000198898|CAPZA2	0.859045	0.212329	1.28432	-1.17796	-0.0957222	-1.08201	1	1858	1
1859	1859	ENSG00000105185|PDCD5	0.933197	0.30331	1.13025	-1.19363	-0.01787	-1.15526	1	1859	1
1860	1860	ENSG00000178982|EIF3K	1.00809	0.24957	1.14438	-1.13484	-0.123166	-1.14404	1	1860	1
1861	1861	ENSG00000243927|MRPS6	0.957162	0.235979	1.15584	-1.0834	-0.0337942	-1.23179	1	1861	1
1862	1862	ENSG00000175581|MRPL48	0.880559	0.107104	1.21444	-0.962083	0.102427	-1.34245	1	1862	1
1863	1863	ENSG00000273611|ZNHIT3	0.968735	0.149643	1.13778	-0.939128	0.046961	-1.36399	1	1863	1
1864	1864	ENSG00000175606|TMEM70	0.982328	0.212591	1.05385	-1.1159	0.137954	-1.27082	1	1864	1
1865	1865	ENSG00000113558|SKP1	0.923139	0.0476348	1.14321	-1.12737	0.241869	-1.22848	1	1865	1
1866	1866	ENSG00000138069|RAB1A	0.887254	0.0842216	1.19838	-1.07442	0.164739	-1.26018	1	1866	1
1867	1867	ENSG00000197223|C1D	0.774291	0.103428	1.40542	-0.931402	-0.113074	-1.23866	1	1867	1
1868	1868	ENSG00000117118|SDHB	0.930901	0.204183	1.26477	-1.03823	-0.187283	-1.17434	1	1868	1
1869	1869	ENSG00000115947|ORC4	0.935776	0.0474617	1.34116	-0.920346	-0.206726	-1.19733	1	1869	1
1870	1870	ENSG00000129484|PARP2	1.02054	0.0243067	1.26314	-1.01981	-0.147772	-1.14041	1	1870	1
1871	1871	ENSG00000180817|PPA1	1.01692	-0.121171	1.27154	-0.987202	-0.0140716	-1.16602	1	1871	1
1872	1872	ENSG00000186106|ANKRD46	1.00164	-0.160921	1.24089	-0.946549	0.0998837	-1.23494	1	1872	1
1873	1873	ENSG00000164919|COX6C	1.08745	0.0682215	1.14288	-1.02322	-0.0691578	-1.20617	1	1873	1
1874	1874	ENSG00000168385|SEPT2	1.06896	0.147214	1.14793	-1.00165	-0.139709	-1.22274	1	1874	1
1875	1875	ENSG00000179841|AKAP5	1.07672	-0.0544735	1.22545	-0.856469	-0.13228	-1.25895	1	1875	1
1876	1876	ENSG00000151470|C4orf33	1.0303	-0.00592084	1.19799	-0.893751	-0.0232694	-1.30535	1	1876	1
1877	1877	ENSG00000178999|AURKB	1.04534	0.0366549	1.17885	-0.829299	-0.0818004	-1.34974	1	1877	1
1878	1878	ENSG00000196531|NACA	1.12345	0.0174152	1.17464	-1.17551	-0.166169	-0.973829	1	1878	1
1879	1879	ENSG00000114391|RPL24	1.19881	0.0294874	1.08194	-1.17675	-0.139984	-0.993507	1	1879	1
1880	1880	ENSG00000142168|SOD1	1.1413	0.0659413	1.12569	-1.12967	-0.140189	-1.06307	1	1880	1
1881	1881	ENSG00000125356|NDUFA1	1.17274	-0.0062998	1.14172	-1.02738	-0.168469	-1.11231	1	1881	1
1882	1882	ENSG00000174748|RPL15	1.14951	0.0510328	1.18693	-1.02225	-0.301598	-1.06362	1	1882	1
1883	1883	ENSG00000041357|PSMA4	1.19763	0.304423	1.01735	-1.10297	-0.377816	-1.03862	1	1883	1
1884	1884	ENSG00000172586|CHCHD1	1.21192	0.343977	0.957621	-1.14861	-0.332382	-1.03252	1	1884	1
1885	1885	ENSG00000136942|RPL35	1.302	0.35706	0.853054	-1.11557	-0.359216	-1.03733	1	1885	1
1886	1886	ENSG00000164167|LSM6	1.23326	0.362033	0.888827	-1.21528	-0.262867	-1.00598	1	1886	1
1887	1887	ENSG00000115268|RPS15	1.29461	0.114971	1.04227	-1.13494	-0.47237	-0.844529	1	1887	1
1888	1888	ENSG00000174695|TMEM167A	1.24277	0.0869948	1.08914	-1.1462	-0.373631	-0.89908	1	1888	1
1889	1889	ENSG00000162244|RPL29	1.20406	0.151346	1.1044	-1.11541	-0.389544	-0.954851	1	1889	1
1890	1890	ENSG00000185787|MORF4L1	1.21652	0.146364	1.11113	-1.10651	-0.45503	-0.912476	1	1890	1
1891	1891	ENSG00000162961|DPY30	1.33675	0.115036	0.937175	-1.04663	-0.267936	-1.0744	1	1891	1
1892	1892	ENSG00000151665|PIGF	1.20175	0.203453	1.02856	-1.12255	-0.245277	-1.06593	1	1892	1
1893	1893	ENSG00000221983|UBA52	1.24232	0.0722365	1.06386	-1.12688	-0.260659	-0.990869	1	1893	1
1894	1894	ENSG00000135900|MRPL44	1.20194	0.140235	1.04201	-0.974921	-0.201438	-1.20783	1	1894	1
1895	1895	ENSG00000205531|NAP1L4	1.20172	0.210517	1.00912	-0.929317	-0.237834	-1.25421	1	1895	1
1896	1896	ENSG00000166902|MRPL16	1.21674	0.332416	0.93809	-1.04606	-0.275465	-1.16572	1	1896	1
1897	1897	ENSG00000186666|BCDIN3D	1.2317	0.2456	0.950967	-1.01085	-0.212764	-1.20465	1	1897	1
1898	1898	ENSG00000038274|MAT2B	1.24764	0.151147	0.920969	-1.07101	-0.0562126	-1.19254	1	1898	1
1899	1899	ENSG00000075336|TIMM21	1.2403	0.134384	0.940479	-1.09565	-0.055217	-1.1643	1	1899	1
1900	1900	ENSG00000182952|HMGN4	1.2273	0.282133	0.862694	-0.971213	-0.0899878	-1.31093	1	1900	1
1901	1901	ENSG00000126267|COX6B1	1.23365	0.249635	0.921729	-0.965618	-0.17295	-1.26644	1	1901	1
1902	1902	ENSG00000188010|MORN2	1.25111	0.246367	0.909979	-0.921916	-0.198434	-1.28711	1	1902	1
1903	1903	ENSG00000168078|PBK	1.3645	0.173533	0.829368	-1.02893	-0.18667	-1.1518	1	1903	1
1904	1904	ENSG00000135390|ATP5MC2	1.30841	0.193982	0.871433	-0.980365	-0.168031	-1.22543	1	1904	1
1905	1905	ENSG00000160194|NDUFV3	1.31581	0.283723	0.817588	-0.984184	-0.204405	-1.22853	1	1905	1
1906	1906	ENSG00000134056|MRPS36	1.06782	0.322388	0.981812	-1.14154	-0.0103816	-1.2201	1	1906	1
1907	1907	ENSG00000180879|SSR4	1.06988	0.375313	0.948018	-1.13167	-0.0227577	-1.23878	1	1907	1
1908	1908	ENSG00000151500|THYN1	1.09746	0.36216	0.963839	-1.02392	-0.104935	-1.29461	1	1908	1
1909	1909	ENSG00000183161|FANCF	1.15212	0.350979	0.948454	-1.04246	-0.170509	-1.23858	1	1909	1
1910	1910	ENSG00000109270|LAMTOR3	1.20657	0.231256	0.922618	-1.05384	-0.0722212	-1.23438	1	1910	1
1911	1911	ENSG00000160563|MED27	1.14807	0.308783	0.931294	-1.09565	-0.0616396	-1.23086	1	1911	1
1912	1912	ENSG00000146425|DYNLT1	1.14848	0.286558	0.938474	-0.813006	-0.132337	-1.42817	1	1912	1
1913	1913	ENSG00000163155|LYSMD1	1.06636	0.240092	1.05115	-0.956931	-0.066435	-1.33424	1	1913	1
1914	1914	ENSG00000198860|TSEN15	1.18352	0.162356	0.961353	-0.917591	-0.0462798	-1.34336	1	1914	1
1915	1915	ENSG00000114956|DGUOK	1.17331	0.221727	0.992582	-0.937406	-0.151236	-1.29898	1	1915	1
1916	1916	ENSG00000204435|CSNK2B	1.15959	0.249424	0.975819	-0.892261	-0.141771	-1.35081	1	1916	1
1917	1917	ENSG00000149806|FAU	1.26515	-0.000425488	0.912983	-0.934681	0.056595	-1.29962	1	1917	1
1918	1918	ENSG00000169567|HINT1	1.26368	-0.0531652	0.991342	-0.972929	-0.0162131	-1.21271	1	1918	1
1919	1919	ENSG00000012963|UBR7	1.20398	-0.0965214	1.05147	-0.834399	-0.00572306	-1.31881	1	1919	1
1920	1920	ENSG00000147996|CBWD5	1.34794	-0.122088	0.898673	-0.821598	-0.00465228	-1.29827	1	1920	1
1921	1921	ENSG00000177225|GATD1	1.19258	-0.0402476	1.12285	-0.791377	-0.199601	-1.28421	1	1921	1
1922	1922	ENSG00000156411|ATP5MPL	1.11084	0.0856831	1.15739	-0.772993	-0.255673	-1.32524	1	1922	1
1923	1923	ENSG00000189376|C8orf76	1.18607	0.01755	1.1028	-0.688878	-0.263803	-1.35374	1	1923	1
1924	1924	ENSG00000131495|NDUFA2	1.18401	0.223878	1.0418	-0.805253	-0.341525	-1.30291	1	1924	1
1925	1925	ENSG00000163608|NEPRO	1.18338	0.230715	1.01446	-0.851023	-0.264974	-1.31256	1	1925	1
1926	1926	ENSG00000147403|RPL10	1.21586	0.142363	0.965785	-0.782089	-0.151186	-1.39074	1	1926	1
1927	1927	ENSG00000232388|SMIM26	1.19387	0.156748	1.03494	-0.748749	-0.280445	-1.35637	1	1927	1
1928	1928	ENSG00000136161|RCBTB2	1.22164	0.118381	1.02365	-0.731481	-0.278199	-1.35399	1	1928	1
1929	1929	ENSG00000145912|NHP2	1.21983	0.140742	1.00831	-0.729508	-0.272168	-1.36721	1	1929	1
1930	1930	ENSG00000142937|RPS8	1.49337	-0.403914	0.940161	-1.0024	-0.205074	-0.822145	1	1930	1
1931	1931	ENSG00000143977|SNRPG	1.54166	-0.264391	0.811151	-1.07985	-0.172062	-0.836508	1	1931	1
1932	1932	ENSG00000177600|RPLP2	1.38461	-0.172162	0.983263	-0.954487	-0.17058	-1.07064	1	1932	1
1933	1933	ENSG00000196290|NIF3L1	1.26037	-0.201846	1.13129	-1.03185	-0.15722	-1.00074	1	1933	1
1934	1934	ENSG00000108107|RPL28	1.36125	-0.359436	1.09803	-0.919321	-0.222725	-0.957798	1	1934	1
1935	1935	ENSG00000240344|PPIL3	1.44043	-0.397719	0.991202	-0.905863	-0.159258	-0.96879	1	1935	1
1936	1936	ENSG00000123975|CKS2	1.47874	-0.289093	0.96851	-0.951627	-0.321927	-0.884601	1	1936	1
1937	1937	ENSG00000104613|INTS10	1.41668	-0.233127	0.981494	-1.03271	-0.200267	-0.932063	1	1937	1
1938	1938	ENSG00000142676|RPL11	1.39718	-0.241586	1.02498	-0.946546	-0.241795	-0.992234	1	1938	1
1939	1939	ENSG00000173207|CKS1B	1.18777	-0.475264	1.17675	-1.23057	0.0223446	-0.681031	1	1939	1
1940	1940	ENSG00000183474|GTF2H2C	1.23191	-0.332661	1.05315	-1.29052	0.103859	-0.76574	1	1940	1
1941	1941	ENSG00000143947|RPS27A	1.16726	-0.584516	1.28592	-0.979811	-0.0654945	-0.823363	1	1941	1
1942	1942	ENSG00000182774|RPS17	1.26836	-0.650597	1.19974	-1.06838	-0.14371	-0.605413	1	1942	1
1943	1943	ENSG00000099977|DDT	1.00493	-0.259286	1.35389	-1.01693	-0.0566916	-1.02591	1	1943	1
1944	1944	ENSG00000148303|RPL7A	1.12602	-0.269464	1.24883	-1.03418	-0.0577999	-1.01341	1	1944	1
1945	1945	ENSG00000175063|UBE2C	1.02646	-0.335615	1.33822	-1.11688	-0.0205226	-0.891666	1	1945	1
1946	1946	ENSG00000196262|PPIA	1.03238	-0.34743	1.27139	-1.14472	0.122059	-0.933684	1	1946	1
1947	1947	ENSG00000137720|C11orf1	1.31792	-0.161286	0.977873	-1.13644	-0.00340891	-0.99465	1	1947	1
1948	1948	ENSG00000144713|RPL32	1.17076	-0.197278	1.11025	-1.20206	0.0710714	-0.952756	1	1948	1
1949	1949	ENSG00000196776|CD47	1.24451	-0.184433	1.01266	-1.18315	0.101171	-0.990766	1	1949	1
1950	1950	ENSG00000105829|BET1	1.24434	-0.162341	1.09247	-1.23715	-0.106738	-0.830575	1	1950	1
1951	1951	ENSG00000138495|COX17	1.11783	-0.144937	1.21434	-1.23376	-0.103837	-0.849638	1	1951	1
1952	1952	ENSG00000133641|C12orf29	1.13106	-0.226102	1.25617	-1.13074	-0.139566	-0.890827	1	1952	1
1953	1953	ENSG00000137154|RPS6	1.16703	-0.12982	1.21068	-1.14164	-0.206573	-0.899674	1	1953	1
1954	1954	ENSG00000256525|POLG2	0.789571	-0.217834	1.57102	-0.830591	-0.262214	-1.04995	1	1954	1
1955	1955	ENSG00000137965|IFI44	1.00498	-0.378402	1.41188	-0.653546	-0.209073	-1.17584	1	1955	1
1956	1956	ENSG00000142541|RPL13A	1.02235	-0.273705	1.34149	-0.744544	-0.115734	-1.22986	1	1956	1
1957	1957	ENSG00000204899|MZT1	1.21145	-0.0572692	1.19375	-1.03962	-0.364832	-0.943483	1	1957	1
1958	1958	ENSG00000130414|NDUFA10	1.19618	-0.0574214	1.2489	-1.0164	-0.557408	-0.813843	1	1958	1
1959	1959	ENSG00000119013|NDUFB3	1.21504	-0.0869049	1.21625	-1.07831	-0.442483	-0.823595	1	1959	1
1960	1960	ENSG00000134419|RPS15A	1.20264	-0.105582	1.24832	-1.04831	-0.500151	-0.796923	1	1960	1
1961	1961	ENSG00000106588|PSMA2	1.23479	-0.042097	1.17093	-1.13147	-0.43841	-0.793742	1	1961	1
1962	1962	ENSG00000130638|ATXN10	1.14693	0.0326123	1.24733	-1.10444	-0.531903	-0.790533	1	1962	1
1963	1963	ENSG00000134480|CCNH	1.1812	-0.203746	1.27825	-0.843498	-0.373944	-1.03827	1	1963	1
1964	1964	ENSG00000144827|ABHD10	1.18976	-0.245234	1.25893	-0.981895	-0.272243	-0.949315	1	1964	1
1965	1965	ENSG00000156976|EIF4A2	1.14215	-0.27884	1.33016	-0.926126	-0.327389	-0.939956	1	1965	1
1966	1966	ENSG00000106524|ANKMY2	1.02178	-0.102341	1.41638	-0.951719	-0.497499	-0.886607	1	1966	1
1967	1967	ENSG00000156469|MTERF3	0.965633	-0.0968026	1.43019	-0.972409	-0.35735	-0.969261	1	1967	1
1968	1968	ENSG00000163682|RPL9	1.06854	-0.201181	1.35872	-1.04877	-0.289781	-0.887536	1	1968	1
1969	1969	ENSG00000152904|GGPS1	1.07539	-0.106563	1.33901	-0.956993	-0.350604	-1.00024	1	1969	1
1970	1970	ENSG00000165629|ATP5F1C	1.11583	-0.103477	1.31781	-1.00591	-0.418278	-0.905968	1	1970	1
1971	1971	ENSG00000133997|MED6	0.842124	-0.318517	1.51313	-1.22511	-0.219325	-0.592303	1	1971	1
1972	1972	ENSG00000143106|PSMA5	0.919496	-0.409469	1.51645	-1.05393	-0.258713	-0.713827	1	1972	1
1973	1973	ENSG00000265681|RPL17	1.08277	-0.211816	1.23506	-1.34578	-0.0996994	-0.660532	1	1973	1
1974	1974	ENSG00000149313|AASDHPPT	0.986996	-0.362959	1.35401	-1.23062	-0.00834377	-0.739082	1	1974	1
1975	1975	ENSG00000155438|NIFK	0.959237	-0.191596	1.39908	-1.21779	-0.198356	-0.750581	1	1975	1
1976	1976	ENSG00000143753|DEGS1	1.00419	0.131152	1.33664	-0.547205	-0.828224	-1.09655	1	1976	1
1977	1977	ENSG00000204314|PRRT1	0.922291	0.250163	1.32637	-0.443119	-0.932398	-1.12331	1	1977	1
1978	1978	ENSG00000161010|MRNIP	1.02523	0.225155	1.19249	-0.345508	-0.76822	-1.32915	1	1978	1
1979	1979	ENSG00000105755|ETHE1	1.0359	-0.00356663	1.30055	-0.41804	-0.62022	-1.29462	1	1979	1
1980	1980	ENSG00000152700|SAR1B	1.06951	0.112585	1.26006	-0.60193	-0.603739	-1.23649	1	1980	1
1981	1981	ENSG00000166228|PCBD1	0.86358	0.498967	1.16344	-0.422509	-0.690583	-1.41289	1	1981	1
1982	1982	ENSG00000100129|EIF3L	0.691052	0.540831	1.32131	-0.628097	-0.618607	-1.30649	1	1982	1
1983	1983	ENSG00000115762|PLEKHB2	0.784715	0.510813	1.27114	-0.679004	-0.579971	-1.3077	1	1983	1
1984	1984	ENSG00000011143|MKS1	1.17102	0.468509	0.967211	-0.624728	-0.746839	-1.23517	1	1984	1
1985	1985	ENSG00000125629|INSIG2	1.11708	0.374126	1.10644	-0.632667	-0.8135	-1.15148	1	1985	1
1986	1986	ENSG00000182372|CLN8	1.14129	0.421925	1.05649	-0.640055	-0.859338	-1.12032	1	1986	1
1987	1987	ENSG00000120697|ALG5	0.96976	0.487214	1.13515	-0.701923	-0.588371	-1.30183	1	1987	1
1988	1988	ENSG00000124688|MAD2L1BP	0.925481	0.375974	1.23594	-0.629494	-0.594604	-1.3133	1	1988	1
1989	1989	ENSG00000100316|RPL3	0.961315	0.308787	1.27314	-0.616602	-0.714863	-1.21178	1	1989	1
1990	1990	ENSG00000084072|PPIE	1.00772	0.45917	1.16692	-0.721201	-0.779141	-1.13347	1	1990	1
1991	1991	ENSG00000005448|WDR54	1.07165	0.412637	1.10414	-0.59467	-0.750935	-1.24283	1	1991	1
1992	1992	ENSG00000165792|METTL17	1.07968	0.374575	1.1145	-0.636592	-0.666097	-1.26607	1	1992	1
1993	1993	ENSG00000175482|POLD4	0.762753	0.360562	1.37647	-0.71423	-0.512443	-1.27311	1	1993	1
1994	1994	ENSG00000197885|NKIRAS1	0.81803	0.292747	1.35948	-0.778075	-0.421931	-1.27025	1	1994	1
1995	1995	ENSG00000106211|HSPB1	0.722383	0.271949	1.47812	-0.727441	-0.58298	-1.16203	1	1995	1
1996	1996	ENSG00000108591|DRG2	0.714036	0.42145	1.40082	-0.618628	-0.705091	-1.21259	1	1996	1
1997	1997	ENSG00000119979|FAM45A	0.792796	0.408761	1.36523	-0.672043	-0.730704	-1.16404	1	1997	1
1998	1998	ENSG00000163933|RFT1	0.911215	0.214795	1.39931	-0.946854	-0.68157	-0.896893	1	1998	1
1999	1999	ENSG00000079150|FKBP7	0.89499	0.386824	1.31005	-1.00394	-0.614386	-0.973539	1	1999	1
[truncated: 8,492 more rows]

## Sheet: DGE Low.poly TSC2--.vs.TSC2++
gene_id	baseMean	log2FoldChange	lfcSE	stat	pvalue	padj	gene_name
ENSG00000000005	4.7307	-1.45841	1.03065	-1.41504	0.157057		TNMD
ENSG00000000419	426.722	0.408426	0.193113	2.11496	0.0344337	0.152718	DPM1
ENSG00000000457	67.5076	-0.223576	0.306942	-0.728399	0.466369	0.661415	SCYL3
ENSG00000000460	97.4414	-0.209338	0.290245	-0.721247	0.470757	0.664591	C1orf112
ENSG00000000938	10.598	-0.132726	0.712235	-0.186351	0.85217		FGR
ENSG00000000971	33.348	-0.669265	0.513623	-1.30303	0.192565	0.396707	CFH
ENSG00000001036	95.1543	1.04406	0.270838	3.85491	0.000115772	0.00409276	FUCA2
ENSG00000001084	78.1933	0.341806	0.279649	1.22227	0.221607	0.429331	GCLC
ENSG00000001167	66.7654	0.0137495	0.309829	0.0443777	0.964603	0.983052	NFYA
ENSG00000001460	48.3705	-0.09064	0.388296	-0.23343	0.815427	0.900807	STPG1
ENSG00000001461	79.579	0.664045	0.355181	1.8696	0.0615398	0.210109	NIPAL3
ENSG00000001497	76.3089	-0.265119	0.282974	-0.936904	0.348808	0.559983	LAS1L
ENSG00000001561	12.9816	-0.12798	0.589865	-0.216965	0.828236		ENPP4
ENSG00000001617	61.1674	-0.651516	0.293107	-2.22279	0.0262299	0.13088	SEMA3F
ENSG00000001626	77.6436	-0.608461	0.39631	-1.53531	0.124707	0.31182	CFTR
ENSG00000001629	361.657	0.0951755	0.187885	0.506562	0.612462	0.770273	ANKIB1
ENSG00000001630	138.414	0.793841	0.248481	3.19478	0.00139938	0.0240542	CYP51A1
ENSG00000001631	72.2327	0.274484	0.301989	0.908922	0.363391	0.572132	KRIT1
ENSG00000002016	187.572	-0.409714	0.231167	-1.77238	0.0763321	0.237104	RAD52
ENSG00000002330	902.447	0.639508	0.233388	2.74011	0.0061419	0.0602808	BAD
ENSG00000002549	85.1089	0.094672	0.298905	0.316729	0.751449	0.864318	LAP3
ENSG00000002586	703.035	0.28393	0.237773	1.19413	0.232429	0.44143	CD99
ENSG00000002587	96.4998	0.98793	0.363555	2.71742	0.00657938	0.0623074	HS3ST1
ENSG00000002726	22.4959	-0.0207608	0.452829	-0.0458469	0.963432	0.982997	AOC1
ENSG00000002745	9.03098	-0.648025	0.7101	-0.912582	0.361462		WNT16
ENSG00000002746	348.947	-0.554683	0.200999	-2.75963	0.00578673	0.0581668	HECW1
ENSG00000002822	207.411	-0.419532	0.210018	-1.9976	0.04576	0.178064	MAD1L1
ENSG00000002834	259.666	0.299831	0.223733	1.34013	0.180203	0.382101	LASP1
ENSG00000002919	246.71	0.737927	0.286693	2.57393	0.0100552	0.0787093	SNX11
ENSG00000002933	6.96239	0.267137	0.90714	0.294483	0.768389		TMEM176A
ENSG00000003056	188.605	1.20547	0.25436	4.73923	2.14528e-06	0.000179575	M6PR
ENSG00000003096	130.994	-0.272654	0.246883	-1.10438	0.269428	0.479551	KLHL13
ENSG00000003137	21.8871	0.24701	0.462861	0.533659	0.593578	0.756714	CYP26B1
ENSG00000003147	92.2734	-0.110083	0.310436	-0.354609	0.722883	0.845104	ICA1
ENSG00000003249	71.3904	-0.220449	0.343319	-0.642111	0.520801	0.704175	DBNDD1
ENSG00000003393	144.188	0.179739	0.228857	0.785376	0.432233	0.632203	ALS2
ENSG00000003400	42.8542	-1.01554	0.383722	-2.64657	0.00813139	0.0698606	CASP10
ENSG00000003402	55.4893	0.0509538	0.308142	0.165358	0.868662	0.932532	CFLAR
ENSG00000003436	45.3657	-0.0407281	0.570631	-0.0713738	0.9431	0.974064	TFPI
ENSG00000003509	68.8823	-0.188197	0.275834	-0.682285	0.495059	0.682945	NDUFAF7
ENSG00000003756	373.922	-0.0434639	0.19508	-0.222801	0.823691	0.906107	RBM5
ENSG00000003987	120.79	-0.220954	0.242285	-0.911956	0.361792	0.571219	MTMR7
ENSG00000003989	64.5275	-0.870988	0.419352	-2.07698	0.0378029	0.16071	SLC7A2
ENSG00000004059	1239.08	0.60982	0.250532	2.4341	0.0149287	0.0972347	ARF5
ENSG00000004139	119.363	-0.119061	0.268548	-0.44335	0.657512	0.800926	SARM1
ENSG00000004142	290.462	0.0924596	0.225635	0.409775	0.681971	0.818036	POLDIP2
ENSG00000004399	48.6321	1.33586	0.490224	2.72499	0.00643034	0.0615765	PLXND1
ENSG00000004455	401.248	0.465267	0.196555	2.36711	0.0179274	0.107176	AK2
ENSG00000004468	20.3418	-0.296881	0.506386	-0.586274	0.557691	0.73086	CD38
ENSG00000004478	228.1	0.333252	0.285939	1.16547	0.243831	0.453222	FKBP4
ENSG00000004487	255.12	0.0299658	0.218695	0.137021	0.891014	0.945753	KDM1A
ENSG00000004534	814.074	-0.138865	0.185418	-0.748928	0.4539	0.650631	RBM6
ENSG00000004660	66.7874	-0.0865947	0.296411	-0.292144	0.770176	0.875078	CAMKK1
ENSG00000004700	44.7451	0.0265698	0.349145	0.0760995	0.93934	0.971904	RECQL
ENSG00000004766	123.045	-0.225478	0.230379	-0.978726	0.327716	0.539159	VPS50
ENSG00000004777	122.235	0.0124038	0.32505	0.0381596	0.96956	0.985082	ARHGAP33
ENSG00000004779	1386.35	0.550892	0.152821	3.60483	0.000312358	0.00858396	NDUFAB1
ENSG00000004799	4.79542	-1.53581	1.16271	-1.3209	0.186536		PDK4
ENSG00000004809	20.3939	-0.200881	0.472906	-0.42478	0.670997	0.810862	SLC22A16
ENSG00000004838	6.43778	0.820726	0.801486	1.02401	0.305832		ZMYND10
ENSG00000004846	144.489	-0.854804	0.298904	-2.85979	0.00423916	0.0479747	ABCB5
ENSG00000004848	232.228	-0.101707	0.296003	-0.343603	0.731145	0.852271	ARX
ENSG00000004864	205.804	-0.344482	0.205906	-1.673	0.0943265	0.266822	SLC25A13
ENSG00000004866	254.426	0.350664	0.197782	1.77298	0.0762316	0.237104	ST7
ENSG00000004897	287.139	-0.0231387	0.184023	-0.125739	0.899939	0.950729	CDC27
ENSG00000004939	21.4276	-0.484191	0.528009	-0.917013	0.359136	0.568814	SLC4A1
ENSG00000004948	52.4112	-0.718992	0.335644	-2.14212	0.0321835	0.146331	CALCR
ENSG00000004961	113.86	0.623049	0.243713	2.55648	0.0105736	0.0807574	HCCS
ENSG00000004975	130.108	0.295708	0.27363	1.08069	0.279836	0.490884	DVL2
ENSG00000005001	2.95364	0.0785441	1.16262	0.0675578	0.946138		PRSS22
ENSG00000005007	99.2843	-0.129707	0.284322	-0.456196	0.648249	0.794478	UPF1
ENSG00000005020	222.136	-0.413994	0.232299	-1.78216	0.0747234	0.234355	SKAP2
ENSG00000005022	727.084	0.620398	0.224541	2.76296	0.00572794	0.0576953	SLC25A5
ENSG00000005059	195.974	0.0103485	0.231614	0.0446799	0.964362	0.982997	MCUB
ENSG00000005075	861.118	0.369463	0.279856	1.32019	0.186772	0.389938	POLR2J
ENSG00000005100	105.286	-0.180327	0.259709	-0.694343	0.487467	0.677024	DHX33
ENSG00000005102	37.4707	-0.300862	0.405603	-0.741765	0.45823	0.654903	MEOX1
ENSG00000005108	123.096	-0.279895	0.244988	-1.14248	0.253254	0.463498	THSD7A
ENSG00000005156	64.6178	-0.152883	0.323961	-0.471917	0.636986	0.787897	LIG3
ENSG00000005175	138.986	0.243358	0.233384	1.04274	0.297071	0.50868	RPAP3
ENSG00000005187	23.9771	-1.05081	0.540561	-1.94393	0.0519043	0.1895	ACSM3
ENSG00000005189	24.6702	0.346148	0.467275	0.740782	0.458826	0.655433	REXO5
ENSG00000005194	210.829	0.58978	0.274693	2.14705	0.0317895	0.145602	CIAPIN1
ENSG00000005206	89.524	-0.0521472	0.400776	-0.130116	0.896475	0.948577	SPPL2B
ENSG00000005238	117.994	0.66211	0.33939	1.95088	0.0510711	0.187936	FAM214B
ENSG00000005243	14.0409	0.204104	0.632794	0.322544	0.74704		COPZ2
ENSG00000005249	331.353	0.222241	0.221912	1.00148	0.316595	0.527478	PRKAR2B
ENSG00000005302	192.376	0.321615	0.235192	1.36746	0.171482	0.372227	MSL3
ENSG00000005339	453.255	-0.153793	0.199241	-0.771898	0.440175	0.638962	CREBBP
ENSG00000005379	100.096	0.457754	0.268211	1.70669	0.0878796	0.256352	TSPOAP1
ENSG00000005381	4.49336	-1.24777	0.995047	-1.25398	0.20985		MPO
ENSG00000005421	14.711	-0.202466	0.588546	-0.34401	0.730839		PON1
ENSG00000005436	78.9802	-0.18718	0.26461	-0.707379	0.479331	0.670713	GCFC2
ENSG00000005448	556.782	0.598942	0.246169	2.43305	0.0149721	0.0973089	WDR54
ENSG00000005469	144.32	0.118574	0.237912	0.498396	0.618205	0.774479	CROT
ENSG00000005471	27.4986	-0.666035	0.478898	-1.39077	0.164296	0.363682	ABCB4
ENSG00000005483	593.634	0.178387	0.186341	0.957313	0.338409	0.549629	KMT2E
ENSG00000005486	665.14	0.375398	0.2435	1.54168	0.123152	0.309597	RHBDD2
ENSG00000005513	73.9319	-0.705136	0.411979	-1.71158	0.0869736	0.254832	SOX8
ENSG00000005700	175.237	-0.0715487	0.229837	-0.311303	0.755571	0.866595	IBTK
ENSG00000005801	258.136	0.0282644	0.210171	0.134483	0.89302	0.946397	ZNF195
ENSG00000005810	391.926	-0.222234	0.183363	-1.21199	0.225515	0.433781	MYCBP2
ENSG00000005812	58.3421	0.188468	0.379456	0.49668	0.619415	0.774972	FBXL3
ENSG00000005844	152.109	-0.651154	0.310502	-2.0971	0.0359847	0.156687	ITGAL
ENSG00000005882	85.6548	0.616276	0.273328	2.25472	0.0241512	0.123795	PDK2
ENSG00000005884	44.7043	-0.730869	0.344465	-2.12175	0.0338587	0.151088	ITGA3
ENSG00000005889	330.15	-0.158966	0.195262	-0.814116	0.415579	0.617769	ZFX
ENSG00000005893	111.464	0.39728	0.250401	1.58657	0.11261	0.293985	LAMP2
ENSG00000005961	54.5245	-0.224986	0.335541	-0.670517	0.502528	0.688489	ITGA2B
ENSG00000005981	20.4219	0.246504	0.591369	0.416835	0.676799	0.815215	ASB4
ENSG00000006007	492.069	0.461045	0.234319	1.9676	0.0491143	0.184368	GDE1
ENSG00000006015	868.206	0.336246	0.212321	1.58367	0.113269	0.295023	REX1BD
ENSG00000006016	47.1143	-0.199636	0.341313	-0.584906	0.558611	0.731473	CRLF1
ENSG00000006025	28.8442	0.33702	0.433813	0.776877	0.437231	0.636446	OSBPL7
ENSG00000006042	841.496	0.415942	0.226941	1.83283	0.0668286	0.219639	TMEM98
ENSG00000006047	10.3381	1.10779	0.663813	1.66882	0.0951524		YBX2
ENSG00000006062	152.326	-0.361423	0.222743	-1.6226	0.104675	0.282175	MAP3K14
ENSG00000006071	40.6745	-0.523632	0.400722	-1.30672	0.191308	0.395603	ABCC8
ENSG00000006116	95.4638	-0.348604	0.315696	-1.10424	0.26949	0.479551	CACNG3
ENSG00000006118	137.373	-0.173433	0.285861	-0.606702	0.544049	0.721407	TMEM132A
ENSG00000006125	525.514	0.316522	0.183624	1.72376	0.0847521	0.250388	AP2B1
ENSG00000006128	666.433	0.830228	0.666219	1.24618	0.212699	0.420006	TAC1
ENSG00000006194	119.473	0.203571	0.236611	0.86036	0.389591	0.595299	ZNF263
ENSG00000006210	39.1655	-0.0437906	0.45183	-0.0969183	0.922791	0.963128	CX3CL1
ENSG00000006282	49.2704	0.370081	0.440299	0.840522	0.400616	0.604597	SPATA20
ENSG00000006283	80.0343	-0.274731	0.292591	-0.938957	0.347753	0.559177	CACNA1G
ENSG00000006327	32.8546	0.910333	0.511487	1.77978	0.0751128	0.235107	TNFRSF12A
ENSG00000006377	192.32	-0.609096	0.426852	-1.42695	0.153595	0.350535	DLX6
ENSG00000006432	171.545	0.0601465	0.248466	0.242072	0.808724	0.897711	MAP3K9
ENSG00000006451	590.39	0.488672	0.175621	2.78255	0.00539343	0.0554675	RALA
ENSG00000006453	242.432	-0.691151	0.313747	-2.20289	0.0276024	0.134844	BAIAP2L1
ENSG00000006459	166.963	-0.102731	0.215144	-0.477497	0.633008	0.785419	KDM7A
ENSG00000006468	79.6038	-0.91066	0.281488	-3.23516	0.00121574	0.0217534	ETV1
ENSG00000006530	151.06	-0.2965	0.224373	-1.32146	0.186348	0.389295	AGK
ENSG00000006534	6.45679	-0.147612	0.829921	-0.177862	0.858831		ALDH3B1
ENSG00000006555	9.92418	-1.01722	0.707518	-1.43773	0.15051		TTC22
ENSG00000006576	298.791	-0.324769	0.195542	-1.66086	0.0967406	0.270223	PHTF2
ENSG00000006606	45.599	-0.520995	0.355849	-1.46409	0.14317	0.336967	CCL26
ENSG00000006607	233.7	-0.299862	0.228267	-1.31365	0.188965	0.392846	FARP2
ENSG00000006611	8.61734	-0.304851	0.73289	-0.415957	0.677441		USH1C
ENSG00000006625	446.492	0.89989	0.234641	3.83517	0.000125476	0.0043617	GGCT
ENSG00000006634	197.846	0.192863	0.208102	0.926769	0.354046	0.56388	DBF4
ENSG00000006638	26.7075	-0.65821	0.439307	-1.49829	0.134057	0.324474	TBXA2R
ENSG00000006652	416.855	0.772077	0.223593	3.45304	0.00055431	0.0127343	IFRD1
ENSG00000006695	155.979	-0.0456662	0.23099	-0.197698	0.843281	0.918245	COX10
ENSG00000006704	577.49	-0.336429	0.203836	-1.65049	0.098842	0.273383	GTF2IRD1
ENSG00000006712	149.075	0.392631	0.33042	1.18828	0.234723	0.443588	PAF1
ENSG00000006715	200.986	0.160012	0.263954	0.606211	0.544374	0.721407	VPS41
ENSG00000006740	202.818	-0.207419	0.233896	-0.886802	0.375186	0.582367	ARHGAP44
ENSG00000006744	87.0236	0.238669	0.29153	0.818678	0.41297	0.61584	ELAC2
ENSG00000006747	36.1981	-0.475375	0.423703	-1.12195	0.261882	0.471893	SCIN
ENSG00000006756	85.4135	-0.239043	0.257625	-0.927872	0.353474	0.563595	ARSD
ENSG00000006757	77.351	0.739804	0.275294	2.68732	0.00720276	0.0656086	PNPLA4
ENSG00000006788	34.4762	-0.825141	0.392276	-2.10347	0.0354248	0.155317	MYH13
ENSG00000006831	255.797	0.472026	0.201459	2.34303	0.0191278	0.110726	ADIPOR2
ENSG00000006837	28.3898	0.723534	0.496189	1.45818	0.14479	0.339118	CDKL3
ENSG00000007001	171.908	-0.755617	0.270577	-2.79262	0.00522831	0.0544709	UPP2
ENSG00000007047	377.159	0.0476226	0.18304	0.260175	0.794729	0.889575	MARK4
ENSG00000007062	92.7141	-0.0796788	0.268446	-0.296815	0.766608	0.872998	PROM1
ENSG00000007080	922.167	0.717613	0.255287	2.81101	0.00493866	0.0527765	CCDC124
ENSG00000007129	18.7902	-1.24887	0.613402	-2.03597	0.0417533	0.169776	CEACAM21
ENSG00000007168	711.601	-0.0192245	0.178529	-0.107683	0.914247	0.958676	PAFAH1B1
ENSG00000007171	19.7612	-0.449421	0.518595	-0.866613	0.386154	0.591911	NOS2
ENSG00000007174	342.883	-0.531815	0.235824	-2.25513	0.024125	0.123795	DNAH9
ENSG00000007202	171.759	0.36683	0.225494	1.62678	0.103783	0.280909	KIAA0100
ENSG00000007237	416.134	-0.350915	0.179948	-1.95009	0.0511658	0.188094	GAS7
ENSG00000007255	342.768	0.52058	0.26513	1.96349	0.0495889	0.185243	TRAPPC6A
ENSG00000007264	54.7816	-0.805518	0.391375	-2.05818	0.0395733	0.164635	MATK
ENSG00000007306	62.4962	-1.19404	0.590835	-2.02093	0.0432866	0.173016	CEACAM7
ENSG00000007312	1.95639	0.445391	1.81096	0.245941	0.805728		CD79B
ENSG00000007314	19.8962	-1.00486	0.531136	-1.8919	0.0585037	0.203616	SCN4A
ENSG00000007341	282.273	-0.000248243	0.202691	-0.00122474	0.999023	0.999369	ST7L
ENSG00000007350	110.822	-0.0150949	0.312939	-0.0482359	0.961528	0.982507	TKTL1
ENSG00000007372	638.46	0.028135	0.277036	0.101557	0.919108	0.961075	PAX6
ENSG00000007376	84.507	0.564057	0.346144	1.62954	0.103198	0.279954	RPUSD1
ENSG00000007384	7.52211	1.36222	0.820895	1.65944	0.097028		RHBDF1
ENSG00000007392	558.293	0.251672	0.232159	1.08405	0.278343	0.489267	LUC7L
ENSG00000007402	77.1815	-0.383711	0.308249	-1.24481	0.213202	0.420656	CACNA2D2
ENSG00000007516	32.3661	0.309831	0.382526	0.809963	0.417962	0.619478	BAIAP3
ENSG00000007520	282.785	0.146519	0.228162	0.642173	0.520761	0.704175	TSR3
ENSG00000007541	151.153	0.16418	0.279007	0.588443	0.556235	0.729601	PIGQ
ENSG00000007545	103.191	-0.00982574	0.303869	-0.0323354	0.974205	0.98777	CRAMP1
ENSG00000007866	63.5952	-0.317451	0.33764	-0.940204	0.347113	0.558396	TEAD3
ENSG00000007923	176.526	-0.242018	0.210956	-1.14724	0.251281	0.461817	DNAJC11
ENSG00000007933	16.307	-1.02838	0.675544	-1.52229	0.127936		FMO3
ENSG00000007944	56.7409	0.691143	0.472307	1.46333	0.143376	0.33709	MYLIP
ENSG00000007952	44.2843	-0.732606	0.367625	-1.99281	0.0462823	0.178997	NOX1
ENSG00000007968	111.873	-0.211212	0.267343	-0.790038	0.429505	0.629815	E2F2
ENSG00000008018	1055.45	0.554516	0.198538	2.793	0.00522225	0.0544467	PSMB1
ENSG00000008056	65.6847	-0.484371	0.356001	-1.36059	0.173643	0.374905	SYN1
ENSG00000008083	489.72	-0.227311	0.173426	-1.31071	0.189955	0.39408	JARID2
ENSG00000008086	342.266	-0.159191	0.203302	-0.783027	0.433611	0.633392	CDKL5
ENSG00000008118	28.7102	0.715996	0.43393	1.65003	0.0989377	0.273595	CAMK1G
ENSG00000008128	64.5914	0.58214	0.374143	1.55593	0.119726	0.304382	CDK11A
ENSG00000008130	200.32	0.337501	0.205106	1.6455	0.0998678	0.274917	NADK
ENSG00000008196	16.9454	0.410714	0.692398	0.593175	0.553064		TFAP2B
ENSG00000008197	13.4625	-0.274577	0.595452	-0.461125	0.644709		TFAP2D
ENSG00000008226	27.8185	-0.581284	0.419565	-1.38545	0.165916	0.365661	DLEC1
ENSG00000008256	364.768	-0.480931	0.213612	-2.25142	0.0243589	0.124706	CYTH3
ENSG00000008277	207.829	-0.207399	0.20343	-1.01951	0.307961	0.518645	ADAM22
ENSG00000008282	105.99	0.310687	0.251014	1.23773	0.215817	0.422946	SYPL1
ENSG00000008283	46.1892	0.778997	0.421888	1.84645	0.0648262	0.215734	CYB561
ENSG00000008294	805.434	0.207346	0.169807	1.22107	0.222061	0.429752	SPAG9
ENSG00000008300	124.918	-0.176628	0.268079	-0.658867	0.509981	0.695625	CELSR3
ENSG00000008311	98.0048	-0.220713	0.269946	-0.81762	0.413574	0.616019	AASS
ENSG00000008323	10.7204	-0.286933	0.63155	-0.454332	0.64959		PLEKHG6
ENSG00000008324	651.539	0.603461	0.240677	2.50735	0.0121641	0.0862562	SS18L2
ENSG00000008382	146.394	0.428862	0.255713	1.67712	0.0935187	0.265629	MPND
ENSG00000008394	254.202	0.819019	0.337151	2.42924	0.0151307	0.0980767	MGST1
ENSG00000008405	255.364	0.374733	0.193758	1.93403	0.0531094	0.192183	CRY1
ENSG00000008441	62.3702	-0.600217	0.362908	-1.65391	0.0981461	0.272182	NFIX
ENSG00000008513	164.644	-0.0619422	0.239774	-0.258336	0.796148	0.890212	ST3GAL1
ENSG00000008516	4.37522	0.0758553	1.12245	0.06758	0.94612		MMP25
ENSG00000008517	15.8993	-0.384147	0.563815	-0.681335	0.49566		IL32
ENSG00000008710	176.078	0.0418003	0.288982	0.144647	0.88499	0.942036	PKD1
ENSG00000008735	135.292	0.333935	0.341865	0.976805	0.328665	0.53999	MAPK8IP2
ENSG00000008838	209.831	0.0727719	0.273384	0.266189	0.790094	0.886928	MED24
ENSG00000008853	249.62	0.64529	0.311491	2.07162	0.0383011	0.16151	RHOBTB2
ENSG00000008869	211.304	-0.176103	0.229583	-0.767055	0.443049	0.641452	HEATR5B
ENSG00000008952	752.551	0.116746	0.192177	0.607492	0.543524	0.721249	SEC62
ENSG00000008988	4639.11	0.334449	0.212673	1.5726	0.115811	0.299342	RPS20
ENSG00000009307	805.662	0.254715	0.158958	1.60241	0.109065	0.287935	CSDE1
ENSG00000009335	480.765	-0.260314	0.224483	-1.15961	0.246206	0.456349	UBE3C
ENSG00000009413	359.32	-0.365055	0.210008	-1.73829	0.0821593	0.246377	REV3L
ENSG00000009694	197.446	-0.613029	0.335098	-1.8294	0.0673395	0.220702	TENM1
ENSG00000009709	53.2397	-0.71669	0.373297	-1.91989	0.0548714	0.196224	PAX7
ENSG00000009724	54.7258	-0.729174	0.328546	-2.2194	0.0264598	0.131387	MASP2
ENSG00000009765	19.8823	-1.07024	0.519335	-2.06079	0.0393235	0.164059	IYD
ENSG00000009780	142.877	0.0150134	0.228614	0.0656712	0.94764	0.976053	FAM76A
ENSG00000009790	3.7155	0.745125	1.03647	0.718909	0.472197		TRAF3IP3
ENSG00000009830	84.1806	0.169276	0.276413	0.612404	0.540271	0.719028	POMT2
ENSG00000009844	223.214	0.0666736	0.209838	0.317738	0.750684	0.863847	VTA1
ENSG00000009950	60.1291	-0.106225	0.346596	-0.306481	0.759238	0.868954	MLXIPL
ENSG00000009954	426.657	-0.259578	0.199072	-1.30394	0.192255	0.396649	BAZ1B
ENSG00000010017	275.644	-0.0702991	0.210827	-0.333445	0.738798	0.856531	RANBP9
ENSG00000010030	18.7561	-0.640251	0.561428	-1.1404	0.25412	0.46437	ETV7
ENSG00000010072	73.7677	0.398116	0.290829	1.3689	0.17103	0.371845	SPRTN
ENSG00000010165	60.7299	0.137307	0.336162	0.408455	0.68294	0.818787	METTL13
ENSG00000010219	238.324	0.931838	0.224609	4.14872	3.34339e-05	0.00163411	DYRK4
ENSG00000010244	326.215	0.00484146	0.192693	0.0251252	0.979955	0.990569	ZNF207
ENSG00000010256	542.271	0.376972	0.275751	1.36707	0.171602	0.372418	UQCRC1
ENSG00000010270	607.983	0.795299	0.293276	2.71177	0.00669242	0.0630906	STARD3NL
ENSG00000010278	62.5334	0.0324887	0.380233	0.0854442	0.931908	0.96867	CD9
ENSG00000010292	187.112	-0.282066	0.219975	-1.28227	0.199749	0.404976	NCAPD2
ENSG00000010295	58.6192	0.204253	0.361756	0.564616	0.572335	0.741774	IFFO1
ENSG00000010310	47.4656	-0.386295	0.352015	-1.09738	0.272474	0.482541	GIPR
ENSG00000010318	61.3891	0.519111	0.315308	1.64636	0.0996896	0.274655	PHF7
ENSG00000010322	202.038	0.393817	0.252941	1.55695	0.119483	0.304204	NISCH
ENSG00000010327	5.78235	-0.308917	1.00425	-0.307609	0.75838		STAB1
ENSG00000010361	235.09	0.311554	0.30074	1.03596	0.300222	0.51179	FUZ
ENSG00000010379	23.4022	-0.387321	0.503643	-0.769039	0.44187	0.64019	SLC6A13
ENSG00000010404	294.263	0.709358	0.297545	2.38404	0.0171239	0.104618	IDS
ENSG00000010438	77.2656	-0.483208	0.292495	-1.65202	0.09853	0.272727	PRSS3
ENSG00000010539	70.355	0.653744	0.31172	2.09721	0.0359746	0.156687	ZNF200
ENSG00000010610	76.8617	-0.160005	0.279648	-0.572168	0.567208	0.737899	CD4
ENSG00000010626	140.036	0.434581	0.238108	1.82514	0.0679799	0.221803	LRRC23
ENSG00000010671	49.5884	-0.516947	0.319537	-1.6178	0.105706	0.283656	BTK
ENSG00000010704	14.4193	-0.756411	0.649755	-1.16415	0.244364		HFE
ENSG00000010803	342.123	-0.191838	0.209619	-0.915173	0.360101	0.569723	SCMH1
ENSG00000010810	718.389	-0.252704	0.188511	-1.34053	0.180074	0.38201	FYN
ENSG00000010818	132.725	-0.297554	0.263717	-1.12831	0.25919	0.46951	HIVEP2
ENSG00000010932	78.5994	-0.728478	0.315792	-2.30683	0.0210642	0.115686	FMO1
ENSG00000011007	168.283	0.0757307	0.229224	0.330379	0.741114	0.857871	ELOA
ENSG00000011009	406.164	0.689065	0.329387	2.09196	0.036442	0.157722	LYPLA2
ENSG00000011021	147.114	0.0194164	0.246449	0.0787846	0.937204	0.970808	CLCN6
ENSG00000011028	269.087	-0.297837	0.21071	-1.41349	0.15751	0.355676	MRC2
ENSG00000011052	136.36	0.540277	0.245551	2.20027	0.0277879	0.134997	NME1-NME2
ENSG00000011083	10.7471	0.598228	0.668987	0.89423	0.371199		SLC6A7
ENSG00000011105	242.062	-0.676413	0.227433	-2.97413	0.00293824	0.0383128	TSPAN9
ENSG00000011114	302.683	0.0719223	0.227677	0.315897	0.752081	0.864487	BTBD7
ENSG00000011132	61.3729	0.475365	0.334138	1.42266	0.154834	0.351984	APBA3
ENSG00000011143	51.7889	0.352875	0.358142	0.985292	0.324481	0.535802	MKS1
ENSG00000011198	138.449	0.498949	0.236404	2.11058	0.0348084	0.153632	ABHD5
ENSG00000011201	257.245	-0.291859	0.295892	-0.98637	0.323952	0.535325	ANOS1
ENSG00000011243	215.308	-0.0098382	0.214948	-0.0457702	0.963493	0.982997	AKAP8L
ENSG00000011258	243.038	-0.308344	0.208298	-1.4803	0.138792	0.330366	MBTD1
ENSG00000011260	179.94	0.208538	0.234777	0.888237	0.374413	0.581626	UTP18
ENSG00000011275	482.972	-0.307707	0.187071	-1.64487	0.0999974	0.275016	RNF216
ENSG00000011295	260.018	0.0190204	0.206385	0.0921596	0.926571	0.965508	TTC19
ENSG00000011304	275.537	-0.277431	0.204966	-1.35354	0.175882	0.376946	PTBP1
ENSG00000011332	452.972	-0.0616983	0.248667	-0.248116	0.804045	0.894782	DPF1
ENSG00000011347	80.0744	0.491352	0.278478	1.76442	0.0776617	0.239193	SYT7
ENSG00000011376	149.386	-0.498517	0.235877	-2.11346	0.0345614	0.153051	LARS2
ENSG00000011405	364.26	-0.208977	0.218692	-0.955577	0.339286	0.550423	PIK3C2A
ENSG00000011422	125.151	-0.25668	0.234313	-1.09546	0.273315	0.483113	PLAUR
ENSG00000011426	112.458	-0.294798	0.242758	-1.21437	0.224606	0.432823	ANLN
ENSG00000011451	167.055	0.121286	0.271242	0.447151	0.654766	0.798691	WIZ
ENSG00000011454	430.201	-0.114057	0.190348	-0.599205	0.549036	0.724602	RABGAP1
ENSG00000011465	121.608	1.59626	0.936315	1.70484	0.0882248	0.256999	DCN
ENSG00000011478	50.7264	-0.677235	0.32978	-2.0536	0.0400149	0.165856	QPCTL
ENSG00000011485	242.911	-0.175322	0.248744	-0.704832	0.480915	0.671961	PPP5C
ENSG00000011523	204.426	0.20118	0.245102	0.820801	0.41176	0.61479	CEP68
ENSG00000011566	318.461	-0.360155	0.196055	-1.83702	0.0662077	0.218467	MAP4K3
ENSG00000011590	31.4056	-0.740667	0.496317	-1.49233	0.135614	0.326589	ZBTB32
ENSG00000011600	7.90879	0.0320176	0.77255	0.041444	0.966942		TYROBP
ENSG00000011638	167.811	0.377905	0.307224	1.23006	0.218673	0.425515	TMEM159
ENSG00000011677	144.671	-0.719066	0.290097	-2.47871	0.0131858	0.0903787	GABRA3
ENSG00000012048	236.365	-0.544098	0.215401	-2.52598	0.0115377	0.0839816	BRCA1
ENSG00000012061	708.129	0.252093	0.184254	1.36818	0.171257	0.372014	ERCC1
ENSG00000012124	39.7818	-1.33197	0.436334	-3.05264	0.0022684	0.0328304	CD22
ENSG00000012171	29.6887	0.870811	0.432313	2.01431	0.0439772	0.174324	SEMA3B
ENSG00000012174	69.1122	-0.015319	0.313859	-0.0488085	0.961072	0.982351	MBTPS2
ENSG00000012211	8.55004	0.200914	0.728649	0.275735	0.782751		PRICKLE3
ENSG00000012223	12.8038	-0.932453	0.613261	-1.52048	0.12839		LTF
ENSG00000012232	520.11	-0.278132	0.186767	-1.48919	0.136436	0.327583	EXTL3
ENSG00000012504	48.5192	-0.641335	0.387867	-1.65349	0.0982307	0.272261	NR1H4
ENSG00000012660	252.943	0.422317	0.234539	1.80062	0.0717626	0.229684	ELOVL5
ENSG00000012779	17.8479	-0.544244	0.534356	-1.0185	0.308439		ALOX5
ENSG00000012817	2.48118	-0.105036	1.24044	-0.0846766	0.932518		KDM5D
ENSG00000012822	47.9895	-0.0291251	0.381256	-0.0763925	0.939107	0.97175	CALCOCO1
ENSG00000012963	114.819	0.101166	0.248081	0.407793	0.683425	0.818789	UBR7
ENSG00000012983	315.544	-0.174181	0.218575	-0.796894	0.425512	0.626525	MAP4K5
ENSG00000013016	55.6283	0.672042	0.337018	1.99408	0.0461429	0.178866	EHD3
ENSG00000013275	223.972	0.117069	0.213482	0.548378	0.583433	0.749501	PSMC4
ENSG00000013288	56.2028	0.0629811	0.341058	0.184664	0.853493	0.922727	MAN2B2
ENSG00000013293	9.41613	0.46149	0.702436	0.656985	0.511191		SLC7A14
ENSG00000013297	25.4807	1.54498	0.55654	2.77605	0.00550236	0.056133	CLDN11
ENSG00000013306	355.862	0.447904	0.373905	1.19791	0.230953	0.439754	SLC25A39
ENSG00000013364	47.1424	-0.297171	0.387746	-0.766407	0.443434	0.641946	MVP
ENSG00000013374	148.873	-0.164266	0.22965	-0.715291	0.474429	0.666916	NUB1
ENSG00000013375	88.958	0.137932	0.301237	0.457886	0.647034	0.79386	PGM3
ENSG00000013392	49.8892	1.19511	0.34683	3.4458	0.000569378	0.0129528	RWDD2A
ENSG00000013441	748.857	0.238347	0.199745	1.19326	0.232768	0.441718	CLK1
ENSG00000013503	135.257	-0.14672	0.24835	-0.590778	0.554669	0.728538	POLR3B
ENSG00000013523	71.075	-0.53334	0.28904	-1.84521	0.0650065	0.21607	ANGEL1
ENSG00000013561	133.366	0.872012	0.259103	3.3655	0.000764059	0.0159206	RNF14
ENSG00000013563	42.6656	1.1071	0.383804	2.88455	0.00391974	0.0457826	DNASE1L1
ENSG00000013573	59.3059	-0.519054	0.312401	-1.6615	0.0966137	0.27004	DDX11
ENSG00000013583	123.604	0.43177	0.25234	1.71106	0.0870694	0.255061	HEBP1
ENSG00000013588	35.2663	-0.501823	0.367999	-1.36365	0.172676	0.37363	GPRC5A
ENSG00000013619	96.5497	-0.406544	0.270313	-1.50398	0.132588	0.323072	MAMLD1
ENSG00000013725	30.354	-0.176572	0.439277	-0.401962	0.687712	0.822105	CD6
ENSG00000013810	185.912	0.0178258	0.287434	0.062017	0.950549	0.977806	TACC3
ENSG00000014123	58.0069	-0.0699235	0.337566	-0.20714	0.8359	0.913756	UFL1
ENSG00000014138	23.9279	0.00528579	0.437215	0.0120897	0.990354	0.99548	POLA2
ENSG00000014164	94.1116	-0.448861	0.250901	-1.789	0.0736154	0.232735	ZC3H3
ENSG00000014216	169.386	0.237125	0.218504	1.08522	0.277824	0.48859	CAPN1
ENSG00000014257	37.827	-0.421984	0.402226	-1.04912	0.294123	0.505295	ACPP
ENSG00000014641	393.914	0.39775	0.179946	2.21038	0.0270789	0.133373	MDH1
ENSG00000014824	595.065	0.330516	0.165798	1.99348	0.0462088	0.178902	SLC30A9
ENSG00000014914	6.49379	1.51117	0.932731	1.62015	0.105199		MTMR11
ENSG00000014919	51.1957	-0.0682938	0.324008	-0.210778	0.83306	0.912442	COX15
ENSG00000015133	153.65	-0.520322	0.230011	-2.26216	0.0236877	0.122544	CCDC88C
ENSG00000015153	434.599	-0.0305132	0.19715	-0.154771	0.877002	0.937576	YAF2
ENSG00000015171	250.189	-0.162433	0.210209	-0.772724	0.439686	0.63855	ZMYND11
ENSG00000015285	11.6469	0.0212942	0.596008	0.035728	0.971499		WAS
ENSG00000015413	21.78	-0.118019	0.480263	-0.245739	0.805885	0.89594	DPEP1
ENSG00000015475	307.552	-0.108947	0.227898	-0.478052	0.632613	0.78524	BID
ENSG00000015479	289.742	0.22653	0.281405	0.804999	0.42082	0.621943	MATR3
ENSG00000015520	25.5662	-0.662169	0.462482	-1.43177	0.152209	0.349286	NPC1L1
ENSG00000015532	60.3985	-0.0355393	0.348172	-0.102074	0.918698	0.960922	XYLT2
ENSG00000015568	246.089	-0.246895	0.254098	-0.971653	0.331223	0.54254	RGPD5
ENSG00000015592	1977.52	0.85055	0.283075	3.00468	0.00265858	0.0362527	STMN4
ENSG00000015676	350.067	-0.240709	0.1842	-1.30678	0.191289	0.395603	NUDCD3
ENSG00000016082	46.3229	1.57701	0.555002	2.84144	0.00449099	0.0498942	ISL1
ENSG00000016391	21.0369	0.129378	0.466507	0.277333	0.781524	0.881985	CHDH
ENSG00000016402	25.1713	-0.635861	0.426051	-1.49245	0.135581	0.326589	IL20RA
ENSG00000016490	8.1652	-0.995558	0.808288	-1.23169	0.218066		CLCA1
ENSG00000016602	14.3143	-1.6347	0.753776	-2.16868	0.0301066		CLCA4
ENSG00000016864	164.486	0.424431	0.220575	1.9242	0.0543296	0.194904	GLT8D1
ENSG00000017260	287.778	0.130573	0.189697	0.688323	0.491249	0.679685	ATP2C1
ENSG00000017427	10.6568	-0.167546	0.64859	-0.258323	0.796158		IGF1
ENSG00000017483	12.8248	-0.325857	0.58625	-0.555833	0.578325		SLC38A5
ENSG00000017797	231.889	0.055905	0.203103	0.275254	0.783121	0.882926	RALBP1
ENSG00000018189	757.737	0.38554	0.16469	2.34101	0.0192319	0.111033	RUFY3
ENSG00000018236	199.354	-0.424132	0.206812	-2.05082	0.0402849	0.166487	CNTN1
ENSG00000018280	28.5558	-1.16769	0.487571	-2.3949	0.0166247	0.102949	SLC11A1
ENSG00000018408	200.389	-0.587256	0.23676	-2.48039	0.0131239	0.0902498	WWTR1
ENSG00000018510	176.562	-0.412415	0.235901	-1.74826	0.0804196	0.244074	AGPS
ENSG00000018610	167.779	0.129162	0.246218	0.524586	0.599871	0.760874	CXorf56
ENSG00000018625	23.889	-1.31097	0.491836	-2.66547	0.00768811	0.0677302	ATP1A2
ENSG00000018699	248.162	-0.29473	0.252064	-1.16927	0.242297	0.451516	TTC27
ENSG00000018869	53.6873	0.174771	0.314137	0.556353	0.57797	0.745429	ZNF582
ENSG00000019102	12.9677	-2.48098	0.640899	-3.87109	0.000108349		VSIG2
ENSG00000019144	106.02	0.0563358	0.250952	0.224488	0.822377	0.905279	PHLDB1
ENSG00000019169	15.7662	-0.327126	0.570329	-0.573575	0.566255		MARCO
ENSG00000019186	15.8352	-0.591614	0.552317	-1.07115	0.284102		CYP24A1
ENSG00000019485	87.4641	-0.601428	0.273073	-2.20244	0.027634	0.134844	PRDM11
ENSG00000019505	220.116	1.78552	0.276025	6.46868	9.88613e-11	2.52617e-08	SYT13
ENSG00000019549	45.0771	0.60251	1.59358	0.378086	0.705367	0.833251	SNAI2
ENSG00000019582	19.1699	0.951109	0.633836	1.50056	0.133469	0.323943	CD74
ENSG00000019991	19.5839	-1.00002	0.511718	-1.95423	0.0506736	0.187278	HGF
ENSG00000019995	164.628	0.0284814	0.266998	0.106673	0.915049	0.959171	ZRANB1
ENSG00000020129	94.5427	0.193815	0.33304	0.581956	0.560596	0.733215	NCDN
ENSG00000020181	53.3133	-0.656798	0.352742	-1.86198	0.0626066	0.212074	ADGRA2
ENSG00000020256	437.988	-0.472073	0.210303	-2.24473	0.0247855	0.12597	ZFP64
ENSG00000020426	343.116	0.0011623	0.192479	0.00603861	0.995182	0.997966	MNAT1
ENSG00000020577	171.903	-0.904215	0.225962	-4.00162	6.29111e-05	0.00270295	SAMD4A
ENSG00000020633	26.6852	-0.69918	0.533408	-1.31078	0.189933	0.39408	RUNX3
ENSG00000020922	69.7166	-0.386515	0.307337	-1.25763	0.208527	0.415319	MRE11
ENSG00000021300	29.3666	0.827088	0.465297	1.77755	0.075478	0.235606	PLEKHB1
ENSG00000021355	10.0822	-0.649784	0.691041	-0.940298	0.347065		SERPINB1
ENSG00000021461	27.7875	-0.625978	0.413365	-1.51435	0.129938	0.319109	CYP3A43
ENSG00000021488	48.5996	-0.403439	0.349561	-1.15413	0.248447	0.459159	SLC7A9
ENSG00000021574	504.022	0.000999744	0.174646	0.00572441	0.995433	0.997988	SPAST
ENSG00000021645	897.35	-0.838445	0.18711	-4.48101	7.42891e-06	0.000480898	NRXN3
ENSG00000021762	94.0959	0.102479	0.301321	0.3401	0.733781	0.854045	OSBPL5
ENSG00000021776	219.291	-0.440005	0.231815	-1.89808	0.057685	0.202064	AQR
ENSG00000021826	77.6432	-0.189716	0.297768	-0.637125	0.524043	0.706423	CPS1
ENSG00000021852	10.7989	-0.896446	0.666871	-1.34426	0.178865		C8B
ENSG00000022267	883.183	0.278938	0.22499	1.23978	0.215057	0.422257	FHL1
ENSG00000022277	419.834	0.566332	0.289465	1.95648	0.0504088	0.186951	RTF2
ENSG00000022355	14.5772	0.239573	0.547401	0.437655	0.661636		GABRA1
ENSG00000022556	68.6947	-0.307161	0.319374	-0.96176	0.33617	0.54738	NLRP2
ENSG00000022567	78.651	-0.224191	0.263219	-0.851729	0.394364	0.599691	SLC45A4
ENSG00000022840	707.942	0.439213	0.172458	2.54678	0.0108721	0.0815085	RNF10
ENSG00000022976	83.836	-0.433498	0.266146	-1.6288	0.103355	0.280225	ZNF839
ENSG00000023041	217.416	0.387596	0.2775	1.39674	0.162491	0.362211	ZDHHC6
ENSG00000023171	241.849	-0.469382	0.220284	-2.1308	0.0331054	0.148821	GRAMD1B
ENSG00000023191	236.455	0.694692	0.301869	2.3013	0.0213746	0.116659	RNH1
ENSG00000023228	214.708	-0.273606	0.2018	-1.35583	0.175153	0.376332	NDUFS1
ENSG00000023287	371.65	0.0574342	0.188967	0.303938	0.761175	0.870349	RB1CC1
ENSG00000023318	179.959	0.0586215	0.222296	0.26371	0.792004	0.888168	ERP44
ENSG00000023330	161.532	0.705861	0.218211	3.23476	0.00121744	0.0217572	ALAS1
ENSG00000023445	11.1495	0.45554	0.618127	0.736968	0.461142		BIRC3
ENSG00000023516	121.079	-0.0337965	0.240431	-0.140566	0.888213	0.943746	AKAP11
ENSG00000023572	224.844	0.859376	0.229602	3.7429	0.000181911	0.00571022	GLRX2
ENSG00000023608	78.2649	0.339882	0.315929	1.07582	0.282008	0.493151	SNAPC1
ENSG00000023697	182.445	0.130176	0.203755	0.638885	0.522898	0.705774	DERA
ENSG00000023734	857.128	0.749722	0.208791	3.59077	0.000329701	0.00893886	STRAP
ENSG00000023839	34.3785	-0.630703	0.47798	-1.31952	0.186996	0.390144	ABCC2
ENSG00000023892	28.3836	-1.11797	0.541037	-2.06634	0.0387961	0.162937	DEF6
ENSG00000023902	620.831	-0.0689843	0.20769	-0.33215	0.739776	0.856846	PLEKHO1
ENSG00000023909	66.4693	0.342798	0.345293	0.992775	0.320819	0.53202	GCLM
ENSG00000024048	284.765	-0.170131	0.193196	-0.880616	0.378525	0.585579	UBR2
ENSG00000024422	33.2502	0.00347616	0.388968	0.00893689	0.992869	0.996908	EHD2
ENSG00000024526	51.6705	-0.414916	0.424284	-0.977922	0.328113	0.539447	DEPDC1
ENSG00000024862	86.4647	0.0119455	0.261069	0.045756	0.963505	0.982997	CCDC28A
ENSG00000025039	216.85	1.02838	0.214283	4.79917	1.59328e-06	0.000139796	RRAGD
ENSG00000025156	167.021	0.0589761	0.220025	0.268043	0.788666	0.886268	HSF2
ENSG00000025293	812.199	-0.0549604	0.163791	-0.335553	0.737208	0.855913	PHF20
ENSG00000025423	72.8673	-0.627361	0.339237	-1.84933	0.0644105	0.21512	HSD17B6
ENSG00000025434	91.659	0.0110379	0.267639	0.0412417	0.967103	0.98413	NR1H3
ENSG00000025708	42.8398	-0.497462	0.390501	-1.27391	0.202697	0.408688	TYMP
ENSG00000025770	227.781	0.0613323	0.366299	0.167438	0.867026	0.93156	NCAPH2
ENSG00000025772	95.8214	0.516102	0.269882	1.91232	0.0558346	0.198216	TOMM34
ENSG00000025796	385.334	0.159785	0.187812	0.850772	0.394896	0.600007	SEC63
ENSG00000025800	409.236	-0.0586726	0.197845	-0.296558	0.766804	0.873085	KPNA6
ENSG00000026025	2973.43	-0.221198	0.186323	-1.18717	0.235161	0.44407	VIM
ENSG00000026036	3.38633	-0.222828	1.02938	-0.216468	0.828623		RTEL1-TNFRSF6B
ENSG00000026103	10.0256	0.0648719	0.645604	0.100482	0.919961		FAS
ENSG00000026297	138.362	0.378882	0.243658	1.55497	0.119953	0.304799	RNASET2
ENSG00000026508	35.3495	-0.217475	0.394527	-0.551229	0.581477	0.747964	CD44
ENSG00000026559	46.3777	-0.0367759	0.381181	-0.0964791	0.92314	0.963354	KCNG1
ENSG00000026652	327.945	-0.223389	0.183746	-1.21575	0.22408	0.432225	AGPAT4
ENSG00000026950	20.4823	0.658658	0.470729	1.39923	0.161744	0.360933	BTN3A1
ENSG00000027001	143.195	-0.409328	0.332185	-1.23223	0.217864	0.424669	MIPEP
ENSG00000027075	193.895	-0.730159	0.290346	-2.51479	0.0119103	0.0852866	PRKCH
ENSG00000027644	1.63298	1.33539	1.70358	0.783872	0.433115		INSRR
ENSG00000027697	72.5432	0.00845445	0.284562	0.0297104	0.976298	0.988766	IFNGR1
ENSG00000027847	147.982	0.329971	0.332831	0.991407	0.321487	0.532777	B4GALT7
ENSG00000027869	3.34271	2.36083	1.35525	1.742	0.0815092		SH2D2A
ENSG00000028116	67.8477	-0.129219	0.316566	-0.408192	0.683133	0.818787	VRK2
ENSG00000028137	35.6991	-0.379336	0.386658	-0.981064	0.326561	0.53799	TNFRSF1B
ENSG00000028203	589.594	0.149991	0.198101	0.757142	0.448965	0.646967	VEZT
ENSG00000028277	478.34	0.737077	0.199274	3.69882	0.000216608	0.00645172	POU2F2
ENSG00000028310	132.899	0.234201	0.324004	0.722834	0.469782	0.663728	BRD9
ENSG00000028528	361.015	-0.43835	0.215997	-2.02943	0.0424148	0.170986	SNX1
ENSG00000028839	423.578	0.705402	0.227108	3.10602	0.00189626	0.0293491	TBPL1
ENSG00000029153	51.231	-0.119615	0.346703	-0.345007	0.730089	0.851307	ARNTL2
ENSG00000029363	286.061	-0.294614	0.224822	-1.31043	0.19005	0.394142	BCLAF1
ENSG00000029364	285.917	0.407859	0.202302	2.01608	0.0437911	0.173916	SLC39A9
ENSG00000029534	142.406	-0.563519	0.229079	-2.45993	0.0138962	0.0930569	ANK1
ENSG00000029559	3.20813	-0.620047	1.18515	-0.52318	0.600849		IBSP
ENSG00000029639	60.9734	0.0915619	0.289369	0.316419	0.751684	0.864426	TFB1M
ENSG00000029725	602.303	0.478849	0.179064	2.67418	0.00749115	0.0669789	RABEP1
ENSG00000029993	1289.87	-0.0852664	0.183557	-0.464523	0.642273	0.791897	HMGB3
ENSG00000030066	291.499	-0.495956	0.194314	-2.55235	0.0107	0.081085	NUP160
ENSG00000030110	121.546	0.894237	0.347938	2.57011	0.0101667	0.0793137	BAK1
ENSG00000030304	64.916	-0.626721	0.424941	-1.47484	0.140255	0.332488	MUSK
ENSG00000030419	90.6502	-0.568856	0.33819	-1.68206	0.0925573	0.264022	IKZF2
ENSG00000030582	119.84	0.883797	0.333941	2.64657	0.00813138	0.0698606	GRN
ENSG00000031003	322.146	-0.284708	0.193487	-1.47146	0.141166	0.333887	FAM13B
ENSG00000031081	68.2836	-0.265835	0.313592	-0.84771	0.396599	0.601402	ARHGAP31
ENSG00000031691	77.1463	-0.28163	0.269839	-1.0437	0.296626	0.508351	CENPQ
ENSG00000031698	486.87	0.499382	0.222319	2.24624	0.0246889	0.125732	SARS
ENSG00000031823	198.972	-0.100084	0.230997	-0.433268	0.66482	0.806638	RANBP3
ENSG00000032219	356.833	0.218849	0.183012	1.19582	0.231767	0.440748	ARID4A
ENSG00000032389	310.626	0.208907	0.274629	0.760687	0.446844	0.645151	EIPR1
ENSG00000032444	107.944	-0.395261	0.25779	-1.53326	0.125211	0.312597	PNPLA6
ENSG00000032742	186.416	-0.378107	0.251482	-1.50351	0.132707	0.323072	IFT88
ENSG00000033011	45.0005	0.23394	0.351101	0.666304	0.505217	0.691197	ALG1
ENSG00000033030	147.089	-0.159502	0.223696	-0.713029	0.475828	0.667736	ZCCHC8
ENSG00000033050	97.3845	0.190988	0.28708	0.665279	0.505872	0.691829	ABCF2
ENSG00000033100	57.8423	0.699923	0.36578	1.91351	0.055683	0.198004	CHPF2
ENSG00000033122	390.966	-0.680465	0.198265	-3.4321	0.000598927	0.0132978	LRRC7
ENSG00000033170	562.034	-0.297227	0.187338	-1.58658	0.112607	0.293985	FUT8
ENSG00000033178	247.915	-0.476287	0.304661	-1.56333	0.117974	0.302197	UBA6
ENSG00000033327	217.27	0.199677	0.244028	0.818255	0.413211	0.616019	GAB2
ENSG00000033627	227.606	0.141244	0.194023	0.727975	0.466629	0.661415	ATP6V0A1
ENSG00000033800	296.016	0.0116971	0.201249	0.0581225	0.953651	0.978922	PIAS1
ENSG00000033867	359.772	-0.26686	0.19724	-1.35297	0.176065	0.377169	SLC4A7
ENSG00000034053	500.13	-0.105856	0.197732	-0.53535	0.592408	0.755991	APBA2
ENSG00000034152	116.823	0.974151	0.239106	4.07415	4.61833e-05	0.00212195	MAP2K3
ENSG00000034239	16.3313	0.20329	0.630731	0.322308	0.747219		EFCAB1
ENSG00000034510	27201.4	0.567061	0.273488	2.07344	0.0381314	0.161261	TMSB10
ENSG00000034533	27.2614	0.250928	0.454513	0.552082	0.580892	0.747807	ASTE1
ENSG00000034677	128.624	-0.168704	0.283911	-0.594216	0.552368	0.727171	RNF19A
ENSG00000034693	73.3579	0.139337	0.293553	0.474657	0.635032	0.786851	PEX3
ENSG00000034713	1514.98	0.524889	0.182421	2.87735	0.00401036	0.0462843	GABARAPL2
ENSG00000034971	22.1212	-1.47216	0.575435	-2.55835	0.010517	0.0806391	MYOC
ENSG00000035115	129.981	0.139881	0.233162	0.59993	0.548553	0.724284	SH3YL1
ENSG00000035141	357.777	0.355955	0.21292	1.67178	0.0945676	0.267244	FAM136A
ENSG00000035403	270.208	-0.174232	0.187485	-0.92931	0.352728	0.56312	VCL
ENSG00000035499	124.125	-0.214862	0.263655	-0.814934	0.41511	0.617325	DEPDC1B
ENSG00000035664	364.571	-0.93265	0.294679	-3.16497	0.00155101	0.0257001	DAPK2
ENSG00000035681	133.891	-0.0421504	0.259299	-0.162555	0.870869	0.933349	NSMAF
ENSG00000035687	169.399	-0.0538001	0.282219	-0.190633	0.848813	0.920137	ADSS
ENSG00000035720	31.3962	-0.63346	0.466118	-1.35901	0.174143	0.375483	STAP1
ENSG00000035862	470.61	0.727779	0.207218	3.51214	0.000444522	0.0109551	TIMP2
ENSG00000035928	222.44	-0.331957	0.237233	-1.39929	0.161727	0.360933	RFC1
ENSG00000036054	161.395	-0.203762	0.266091	-0.765759	0.44382	0.642313	TBC1D23
ENSG00000036257	344.8	-0.307329	0.187893	-1.63566	0.101911	0.277912	CUL3
ENSG00000036448	80.8008	-0.124172	0.320946	-0.386894	0.698835	0.829553	MYOM2
ENSG00000036530	68.888	0.736018	0.381289	1.93034	0.0535646	0.193446	CYP46A1
ENSG00000036549	308.366	-0.280438	0.217826	-1.28744	0.197941	0.402779	AC118549.1
ENSG00000036565	12.2463	-0.0732697	0.602077	-0.121695	0.903141		SLC18A1
ENSG00000036672	33.929	0.550378	0.45125	1.21967	0.222588	0.430316	USP2
ENSG00000036828	39.9568	-0.790408	0.351227	-2.25042	0.0244222	0.124898	CASR
ENSG00000037042	86.4516	0.39885	0.317554	1.25601	0.209113	0.416044	TUBG2
ENSG00000037241	714.268	0.594845	0.204371	2.91061	0.00360723	0.0434929	RPL26L1
ENSG00000037280	24.0178	-0.809379	0.494977	-1.63518	0.10201	0.278132	FLT4
ENSG00000037474	97.9386	-0.241407	0.256327	-0.941791	0.3463	0.557692	NSUN2
ENSG00000037637	489.869	-0.121495	0.181606	-0.669005	0.503492	0.689389	FBXO42
ENSG00000037749	167.847	-0.329075	0.317603	-1.03612	0.300146	0.511721	MFAP3
ENSG00000037757	50.1739	0.266342	0.38152	0.698108	0.48511	0.675043	MRI1
ENSG00000037897	32.3693	0.35896	0.566943	0.633151	0.526635	0.70839	METTL1
ENSG00000037965	4.02651	1.19063	1.23181	0.966572	0.333758		HOXC8
ENSG00000038002	33.9068	-0.4302	0.368557	-1.16725	0.243108	0.452584	AGA
ENSG00000038210	31.373	-0.514959	0.447517	-1.1507	0.249854	0.460415	PI4K2B
ENSG00000038219	140.228	-0.385584	0.23099	-1.66927	0.0950639	0.267862	BOD1L1
ENSG00000038274	262.255	0.129871	0.195318	0.664918	0.506103	0.691954	MAT2B
ENSG00000038295	92.2202	-0.445089	0.344687	-1.29129	0.196604	0.401228	TLL1
ENSG00000038358	20.7685	0.52615	0.607064	0.866713	0.386099	0.591911	EDC4
ENSG00000038382	840.95	-0.576219	0.225759	-2.55237	0.0106994	0.081085	TRIO
ENSG00000038427	606.163	-0.824535	0.226491	-3.64048	0.00027213	0.00759305	VCAN
ENSG00000038532	312.647	-0.301412	0.232308	-1.29747	0.194471	0.39877	CLEC16A
ENSG00000038945	164.953	-0.659518	0.29966	-2.20088	0.0277442	0.134968	MSR1
ENSG00000039068	160.273	-0.472233	0.253983	-1.85931	0.0629835	0.21254	CDH1
ENSG00000039123	193.464	-0.484775	0.23611	-2.05317	0.0400557	0.165889	MTREX
ENSG00000039139	88.8598	-0.922219	0.348478	-2.64642	0.00813482	0.0698606	DNAH5
ENSG00000039319	157.617	0.0286587	0.246249	0.116381	0.90735	0.954743	ZFYVE16
ENSG00000039523	137.642	0.199257	0.264463	0.753441	0.451185	0.648398	RIPOR1
ENSG00000039537	73.0424	-0.894755	0.394885	-2.26586	0.0234599	0.121946	C6
ENSG00000039560	296.641	-0.704311	0.189239	-3.72181	0.000197798	0.00600409	RAI14
ENSG00000039600	31.143	0.0371854	0.395827	0.0939436	0.925154	0.96462	SOX30
ENSG00000039650	63.2022	0.355223	0.404367	0.878468	0.37969	0.586819	PNKP
ENSG00000039987	7.90228	0.181482	0.710571	0.255403	0.798412		BEST2
ENSG00000040199	169.02	-0.252056	0.222706	-1.13178	0.257725	0.467992	PHLPP2
ENSG00000040275	110.901	-0.131947	0.244031	-0.540697	0.588717	0.753352	SPDL1
ENSG00000040341	463.667	-0.06944	0.191994	-0.361678	0.717593	0.840983	STAU2
ENSG00000040487	131.325	0.763955	0.254518	3.00157	0.00268588	0.0364584	PQLC2
ENSG00000040531	95.4527	0.650171	0.25612	2.53854	0.0111315	0.0822715	CTNS
ENSG00000040608	89.5102	0.573267	0.307289	1.86557	0.0621022	0.211225	RTN4R
ENSG00000040633	117.635	0.613413	0.267581	2.29244	0.0218802	0.117596	PHF23
ENSG00000040731	93.4749	-0.078551	0.259293	-0.302943	0.761933	0.87067	CDH10
ENSG00000040933	221.274	0.163199	0.242733	0.672338	0.501369	0.6876	INPP4A
ENSG00000041353	138.278	-0.683488	0.296883	-2.30222	0.0213229	0.116596	RAB27B
ENSG00000041357	686.021	0.481907	0.191814	2.51237	0.0119924	0.085604	PSMA4
ENSG00000041515	232.184	-0.480018	0.232504	-2.06456	0.0389649	0.163299	MYO16
ENSG00000041802	62.172	0.0766167	0.316819	0.241831	0.808911	0.897711	LSG1
ENSG00000041880	19.7347	0.524191	0.542575	0.966116	0.333986	0.545104	PARP3
ENSG00000041982	24.7671	-0.0766145	0.530696	-0.144366	0.885211	0.942203	TNC
ENSG00000041988	231.757	0.407585	0.271847	1.49931	0.133792	0.324378	THAP3
ENSG00000042062	148.806	-0.401191	0.25839	-1.55266	0.120505	0.305374	RIPOR3
ENSG00000042088	132.933	0.0209706	0.254667	0.0823451	0.934372	0.970041	TDP1
ENSG00000042286	20.8996	0.415956	0.462361	0.899634	0.368315	0.576813	AIFM2
ENSG00000042304	24.3967	-0.860155	0.451056	-1.90698	0.0565233	0.199736	C2orf83
ENSG00000042317	176.492	0.0604242	0.213349	0.283218	0.77701	0.879652	SPATA7
ENSG00000042429	108.16	-0.0719392	0.278943	-0.257899	0.796485	0.890363	MED17
ENSG00000042445	29.4133	0.0263376	0.386701	0.0681084	0.945699	0.975173	RETSAT
ENSG00000042493	66.9296	0.0665688	0.297155	0.22402	0.822742	0.905488	CAPG
ENSG00000042753	1446.04	0.549227	0.188043	2.92076	0.00349184	0.0428103	AP2S1
ENSG00000042781	277.369	-0.624243	0.248863	-2.50838	0.0121287	0.0860544	USH2A
ENSG00000042813	47.0165	-0.332975	0.390376	-0.85296	0.393682	0.599161	ZPBP
ENSG00000042832	56.4141	-1.34769	0.364785	-3.69446	0.000220351	0.00653647	TG
ENSG00000042980	5.21657	-0.82917	0.872999	-0.949794	0.342217		ADAM28
ENSG00000043039	49.7912	-0.776393	0.34342	-2.26077	0.0237736	0.122744	BARX2
ENSG00000043093	168.535	-0.0624372	0.212291	-0.294112	0.768673	0.874448	DCUN1D1
ENSG00000043143	67.0639	-0.503994	0.336385	-1.49827	0.134064	0.324474	JADE2
ENSG00000043355	144.728	0.737356	0.297497	2.47854	0.0131923	0.0903787	ZIC2
ENSG00000043462	14.8412	-0.31063	0.59498	-0.522086	0.601611		LCP2
ENSG00000043514	276.156	0.136165	0.202725	0.671676	0.50179	0.687865	TRIT1
ENSG00000043591	6.73442	-0.928446	0.871151	-1.06577	0.286528		ADRB1
ENSG00000044090	56.7108	-0.107356	0.315562	-0.340206	0.733701	0.854045	CUL7
ENSG00000044115	584.591	-0.197466	0.174232	-1.13335	0.257065	0.46726	CTNNA1
ENSG00000044446	84.0726	-0.292717	0.28744	-1.01836	0.308508	0.51917	PHKA2
ENSG00000044459	256.081	-0.447163	0.239968	-1.86343	0.0624017	0.211811	CNTLN
ENSG00000044524	529.679	-0.328648	0.186762	-1.75971	0.0784561	0.240431	EPHA3
ENSG00000044574	504.541	0.509278	0.213008	2.39088	0.0168079	0.103415	HSPA5
ENSG00000046604	43.4277	-0.314463	0.427339	-0.735863	0.461814	0.658286	DSG2
ENSG00000046647	95.4743	0.22398	0.273259	0.819663	0.412408	0.615443	GEMIN8
ENSG00000046651	134.128	0.120529	0.230777	0.522277	0.601478	0.761774	OFD1
ENSG00000046653	1300.62	0.665013	0.160065	4.15464	3.25801e-05	0.00160314	GPM6B
ENSG00000046889	147.102	-0.0446692	0.395879	-0.112835	0.910161	0.956526	PREX2
ENSG00000047056	221.072	0.10496	0.2085	0.503406	0.614679	0.771992	WDR37
ENSG00000047188	136.665	-0.0914562	0.232797	-0.392859	0.694424	0.826871	YTHDC2
ENSG00000047230	333.552	-0.43195	0.190214	-2.27086	0.0231557	0.121187	CTPS2
ENSG00000047249	247.04	0.307856	0.201175	1.53029	0.125946	0.314026	ATP6V1H
ENSG00000047315	254.93	-0.100698	0.203541	-0.494729	0.620791	0.775923	POLR2B
ENSG00000047346	328.074	-0.389496	0.345844	-1.12622	0.260073	0.470263	FAM214A
ENSG00000047365	121.933	-0.567396	0.300038	-1.89108	0.0586139	0.203815	ARAP2
ENSG00000047410	219.473	-0.312826	0.257386	-1.21539	0.224216	0.432368	TPR
ENSG00000047457	35.8039	-0.351984	0.480334	-0.73279	0.463686	0.659853	CP
ENSG00000047578	297.911	-0.419081	0.220771	-1.89826	0.0576617	0.202037	KIAA0556
ENSG00000047579	192.844	0.434167	0.207771	2.08964	0.0366501	0.158072	DTNBP1
ENSG00000047597	9.35919	1.35879	0.749927	1.8119	0.0700022		XK
ENSG00000047617	148.559	-0.612672	0.303038	-2.02177	0.0432006	0.172794	ANO2
ENSG00000047621	87.6044	0.361046	0.272471	1.32508	0.185144	0.387882	C12orf4
ENSG00000047634	109.824	0.613184	0.257034	2.38561	0.0170507	0.10427	SCML1
ENSG00000047644	196.314	-0.122626	0.202983	-0.604118	0.545765	0.722511	WWC3
ENSG00000047648	128.369	-0.46318	0.287186	-1.61282	0.106783	0.284905	ARHGAP6
ENSG00000047662	155.042	-0.198304	0.237191	-0.836052	0.403125	0.607001	FAM184B
ENSG00000047849	1218.07	0.35053	0.149638	2.34252	0.019154	0.110726	MAP4
ENSG00000047932	132.416	0.426104	0.260286	1.63706	0.101618	0.277322	GOPC
ENSG00000047936	14.7975	-0.878227	0.587497	-1.49486	0.13495		ROS1
ENSG00000048028	139.766	-0.186597	0.231336	-0.806607	0.419893	0.620963	USP28
ENSG00000048052	494.659	-0.372466	0.201318	-1.85014	0.0642934	0.215013	HDAC9
ENSG00000048140	161.773	0.734918	0.372193	1.97456	0.0483179	0.183066	TSPAN17
ENSG00000048162	378.243	0.154019	0.183582	0.838967	0.401488	0.605474	NOP16
ENSG00000048342	200.856	0.177133	0.219089	0.808496	0.418805	0.620254	CC2D2A
ENSG00000048392	77.2915	0.243099	0.298484	0.814448	0.415388	0.61755	RRM2B
ENSG00000048405	56.5858	-0.090426	0.353481	-0.255815	0.798093	0.891346	ZNF800
ENSG00000048471	580.087	-0.584386	0.208096	-2.80826	0.00498104	0.0530328	SNX29
ENSG00000048540	282.753	1.4603	0.306389	4.76618	1.87756e-06	0.000158992	LMO3
ENSG00000048544	241.398	0.446419	0.294301	1.51688	0.129297	0.318284	MRPS10
ENSG00000048545	80.6178	1.01941	0.311166	3.27611	0.00105248	0.0196398	GUCA1A
ENSG00000048649	748.934	-0.242594	0.167954	-1.44441	0.148623	0.344533	RSF1
ENSG00000048707	351.393	-0.466862	0.218409	-2.13756	0.0325521	0.147197	VPS13D
ENSG00000048740	805.509	0.0767115	0.15894	0.482646	0.629347	0.782988	CELF2
ENSG00000048828	120.328	-0.29347	0.242307	-1.21115	0.225838	0.433781	FAM120A
ENSG00000048991	455.456	-0.098942	0.199769	-0.495283	0.6204	0.7755	R3HDM1
ENSG00000049089	33.4013	0.288417	0.422449	0.682726	0.49478	0.682847	COL9A2
ENSG00000049130	76.4734	0.306663	0.329008	0.932083	0.351294	0.562238	KITLG
ENSG00000049167	190.874	0.345241	0.257899	1.33867	0.180679	0.382591	ERCC8
ENSG00000049192	212.975	-0.631597	0.264139	-2.39116	0.0167954	0.103415	ADAMTS6
ENSG00000049239	73.014	-0.262604	0.286933	-0.915213	0.36008	0.569723	H6PD
ENSG00000049245	153.872	0.934582	0.280155	3.33595	0.000850096	0.0170312	VAMP3
ENSG00000049246	67.7459	0.100381	0.322911	0.310862	0.755906	0.8669	PER3
ENSG00000049247	15.8826	-0.121588	0.589911	-0.206113	0.836703		UTS2
ENSG00000049249	44.732	-1.15456	0.480959	-2.40054	0.0163708	0.102291	TNFRSF9
ENSG00000049283	1.80799	0.756458	1.49	0.507688	0.611672		EPN3
ENSG00000049323	415.541	-0.0708642	0.231644	-0.305919	0.759667	0.869307	LTBP1
ENSG00000049449	317.709	-0.123877	0.193763	-0.639319	0.522615	0.705523	RCN1
ENSG00000049540	49.925	-0.430033	0.337816	-1.27298	0.203025	0.409169	ELN
ENSG00000049541	270.946	-0.0764831	0.224459	-0.340744	0.733296	0.853822	RFC2
ENSG00000049618	621.432	-0.389356	0.180688	-2.15485	0.0311737	0.143926	ARID1B
ENSG00000049656	246.53	0.13803	0.226192	0.610231	0.541709	0.719824	CLPTM1L
ENSG00000049759	776.236	-0.34701	0.214674	-1.61645	0.105997	0.283941	NEDD4L
ENSG00000049768	7.61128	0.106995	0.72185	0.148223	0.882167		FOXP3
ENSG00000049769	110.495	-0.00670679	0.259971	-0.0257983	0.979418	0.990456	PPP1R3F
ENSG00000049860	158.55	0.332668	0.265775	1.25169	0.210683	0.417974	HEXB
ENSG00000049883	70.6514	-0.511628	0.278317	-1.83829	0.066019	0.218033	PTCD2
ENSG00000050030	49.3279	-0.350536	0.326258	-1.07441	0.282637	0.4937	NEXMIF
ENSG00000050130	255.224	0.773613	0.291722	2.65188	0.0080044	0.069248	JKAMP
ENSG00000050165	227.425	0.797827	0.231775	3.44225	0.000576892	0.0130473	DKK3
ENSG00000050327	10.8234	-0.46396	0.695739	-0.666859	0.504862		ARHGEF5
ENSG00000050344	28.2401	-0.604294	0.404283	-1.49473	0.134985	0.325721	NFE2L3
ENSG00000050393	259.059	0.743432	0.259429	2.86565	0.00416154	0.0474279	MCUR1
ENSG00000050405	344.863	-0.530206	0.230979	-2.29547	0.021706	0.11721	LIMA1
ENSG00000050426	181.936	0.101636	0.276327	0.367811	0.713014	0.83818	LETMD1
ENSG00000050438	215.816	0.21061	0.208298	1.0111	0.311967	0.522877	SLC4A8
ENSG00000050555	95.5488	-0.876276	0.301974	-2.90182	0.00370999	0.0442193	LAMC3
ENSG00000050628	70.2668	-0.814282	0.363305	-2.24132	0.0250056	0.126636	PTGER3
ENSG00000050730	35.6556	-0.070756	0.367631	-0.192465	0.847378	0.919559	TNIP3
ENSG00000050748	159.769	0.398508	0.276966	1.43883	0.150197	0.346637	MAPK9
ENSG00000050767	217.878	-0.690997	0.296523	-2.33033	0.0197888	0.112323	COL23A1
ENSG00000050820	117.39	0.146652	0.288651	0.50806	0.611412	0.769524	BCAR1
ENSG00000051009	38.2653	-0.0903621	0.418716	-0.215808	0.829138	0.909709	FAM160A2
ENSG00000051108	271.563	1.09397	0.307596	3.55653	0.000375779	0.00973388	HERPUD1
ENSG00000051128	228.523	0.340964	0.293237	1.16276	0.244927	0.454731	HOMER3
ENSG00000051180	12.4166	-0.38382	0.570667	-0.672581	0.501214		RAD51
ENSG00000051341	148.218	-0.633768	0.273866	-2.31415	0.0206592	0.114455	POLQ
ENSG00000051382	391.584	-0.469807	0.218622	-2.14894	0.0316388	0.145302	PIK3CB
ENSG00000051523	28.9512	0.218741	0.535767	0.408277	0.68307	0.818787	CYBA
ENSG00000051596	312.603	0.290174	0.215275	1.34792	0.177683	0.379387	THOC3
ENSG00000051620	145.918	0.369291	0.234779	1.57293	0.115735	0.299342	HEBP2
ENSG00000051825	279.102	-0.384039	0.25627	-1.49857	0.133985	0.324474	MPHOSPH9
ENSG00000052126	647.358	-0.402237	0.186458	-2.15725	0.0309862	0.143782	PLEKHA5
ENSG00000052344	8.26701	-0.237479	0.779299	-0.304735	0.760568		PRSS8
[truncated: 17,391 more rows]

## Sheet: DEG clusters_Lowpoly
	row	gene_id	TSC2_LowPolysome.196462	TSC2_LowPolysome.196454	TSC2_LowPolysome.196446	WT_LowPolysome.196458	WT_LowPolysome.196450	WT_LowPolysome.196442	ct	rank	cluster
[truncated: 2,287 more rows]

[truncated: 4 more sheets: DGE Mono TSC2--.vs.TSC2++, DEG clusters_Monosome, DGE TSC2++ High.poly.vsMono, DGE TSC2-- High.poly.vsMono]
